# Supplementary material for: BAP1 Loss Is Associated with Higher ASS1 Expression in Epithelioid Mesothelioma: Implications for Therapeutic Stratification
Source: PubMed Central journal article supplement (PMC10150242; doi:10.1158/1541-7786.mcr-22-0635), 2023-01-20
Supplement: mcr-22-0635_supplementary_figures_s1_to_s16_suppsf1-16.pdf [file mcr-22-0635_supplementary_figures_s1_to_s16_suppsf1-16.pdf]

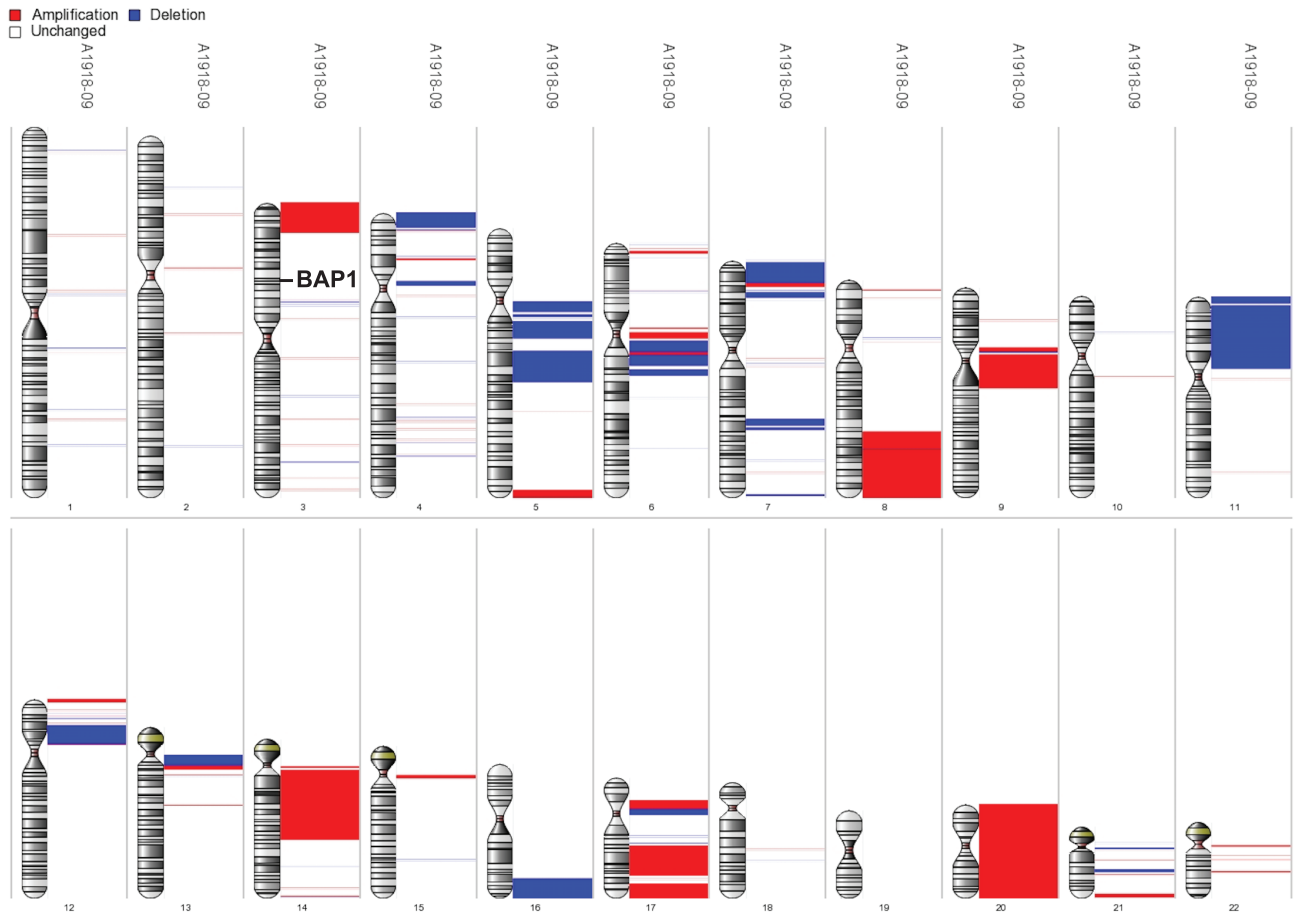

**Supplementary Figure S1. SNP6.0 analysis of parental MeT5A-*BAP1*<sup>+/+</sup> cells.**  
 The clonal parental cells are mainly diploid with some regions of amplification (red) or deletion (blue). Importantly, they are diploid around the *BAP1* locus at 3p21.

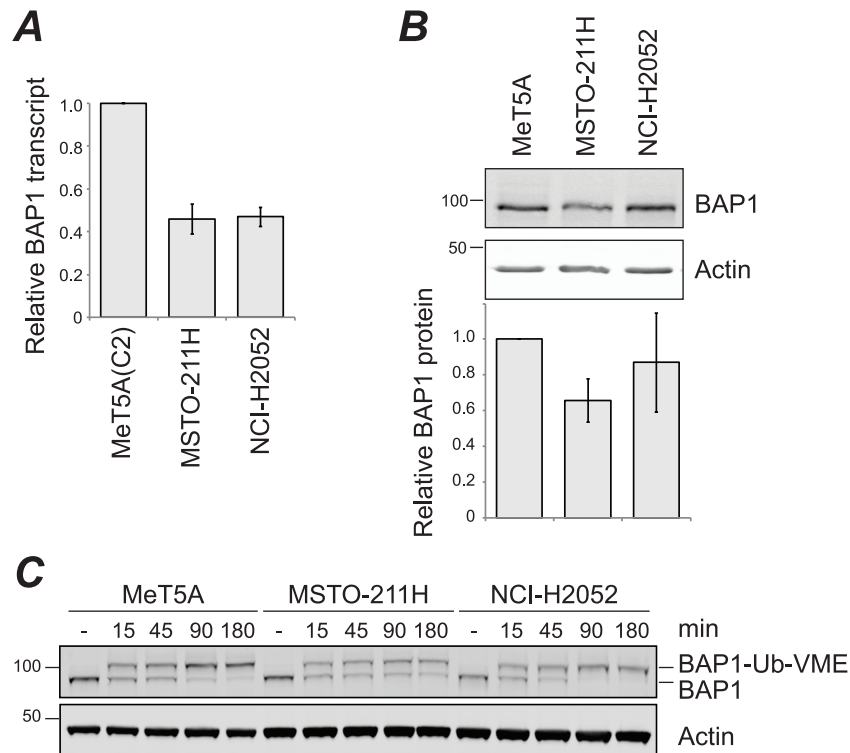

**Supplementary Figure S2. Expression of catalytically active BAP1 in parental MeT5A.**

Comparison of the clonal parental MeT5A-*BAP1*<sup>+/+</sup> line and two MPM cell lines with verified wild-type *BAP1* (15) (Suppl. ref 4): MSTO-211H (biphasic, from pleural effusion) (Suppl. ref 5) and NCI-H2052 (sarcomatoid, from a metastatic lymph node) (Suppl. ref 6). **A**, qRT-PCR analysis of BAP1 mRNA expression (exons 3-to-4) normalised to actin; mean values from 3 independent experiments; error bars SD. **B**, Representative immunoblot (top) and quantification (below) showing mean values normalised to actin from 3 independent experiments; error bars SD. **C**, Ub-VME probe binding assay to demonstrate BAP1 catalytic activity. Non-denaturing cell lysates (15µg protein) were incubated with HA-Ub-VME as indicated at 1:200 probe:protein. Endogenous BAP1 protein bound to the active site-directed probe ubiquitin-VME results in a 10kDa mobility shift. BAP1 reactivity is reduced in MSTO-211H relative to MeT5A.

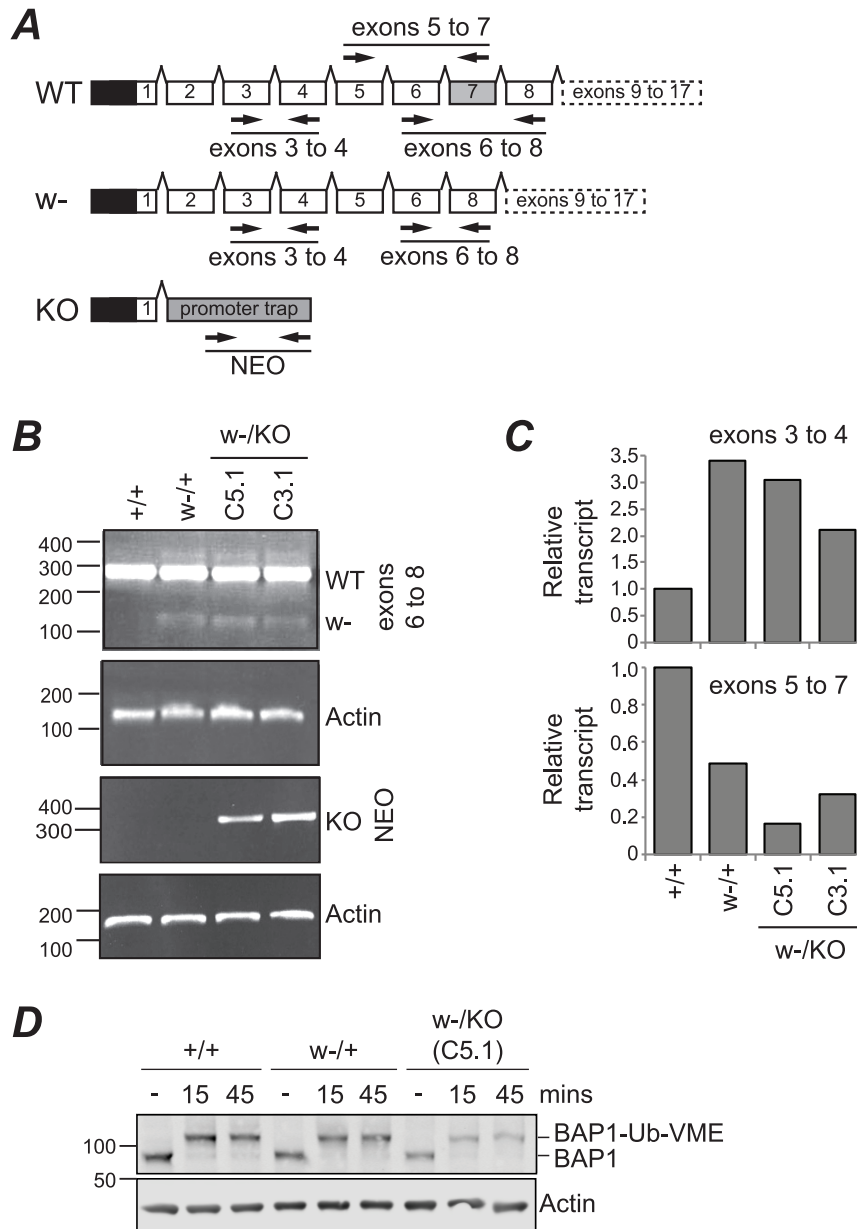

**Supplementary Figure S3. Characterisation of BAP1 expression in gene-edited MeT5A.**

**A**, Schematic of RT-PCR primers used to characterise transcription, illustrating amplicons for wild type (WT) alleles or after successful w- or KO genome-editing. **B**, End-point RT-PCR across exons 6-to-8 shows WT transcript (258bp) and the w-allele splice variant (115bp) and across the NEO transcript sequence confirms the presence of the promoter trap in *BAP1<sup>w-/KO</sup>* clones. **C**, qRT-PCR shows that the w-mutation increases overall BAP1 locus transcription (exons 3-to-4) but confirms reduced WT transcript expression (exons 5-to-7); some WT transcript is detected in *BAP1<sup>w-/KO</sup>* through incomplete mis-splicing of the w-allele. **D**, Residual BAP1 in gene-edited MeT5A cells is catalytically active. Non-denaturing cell lysates (15µg protein) were incubated with HA-Ub-VME as indicated at 1:200 probe:protein.

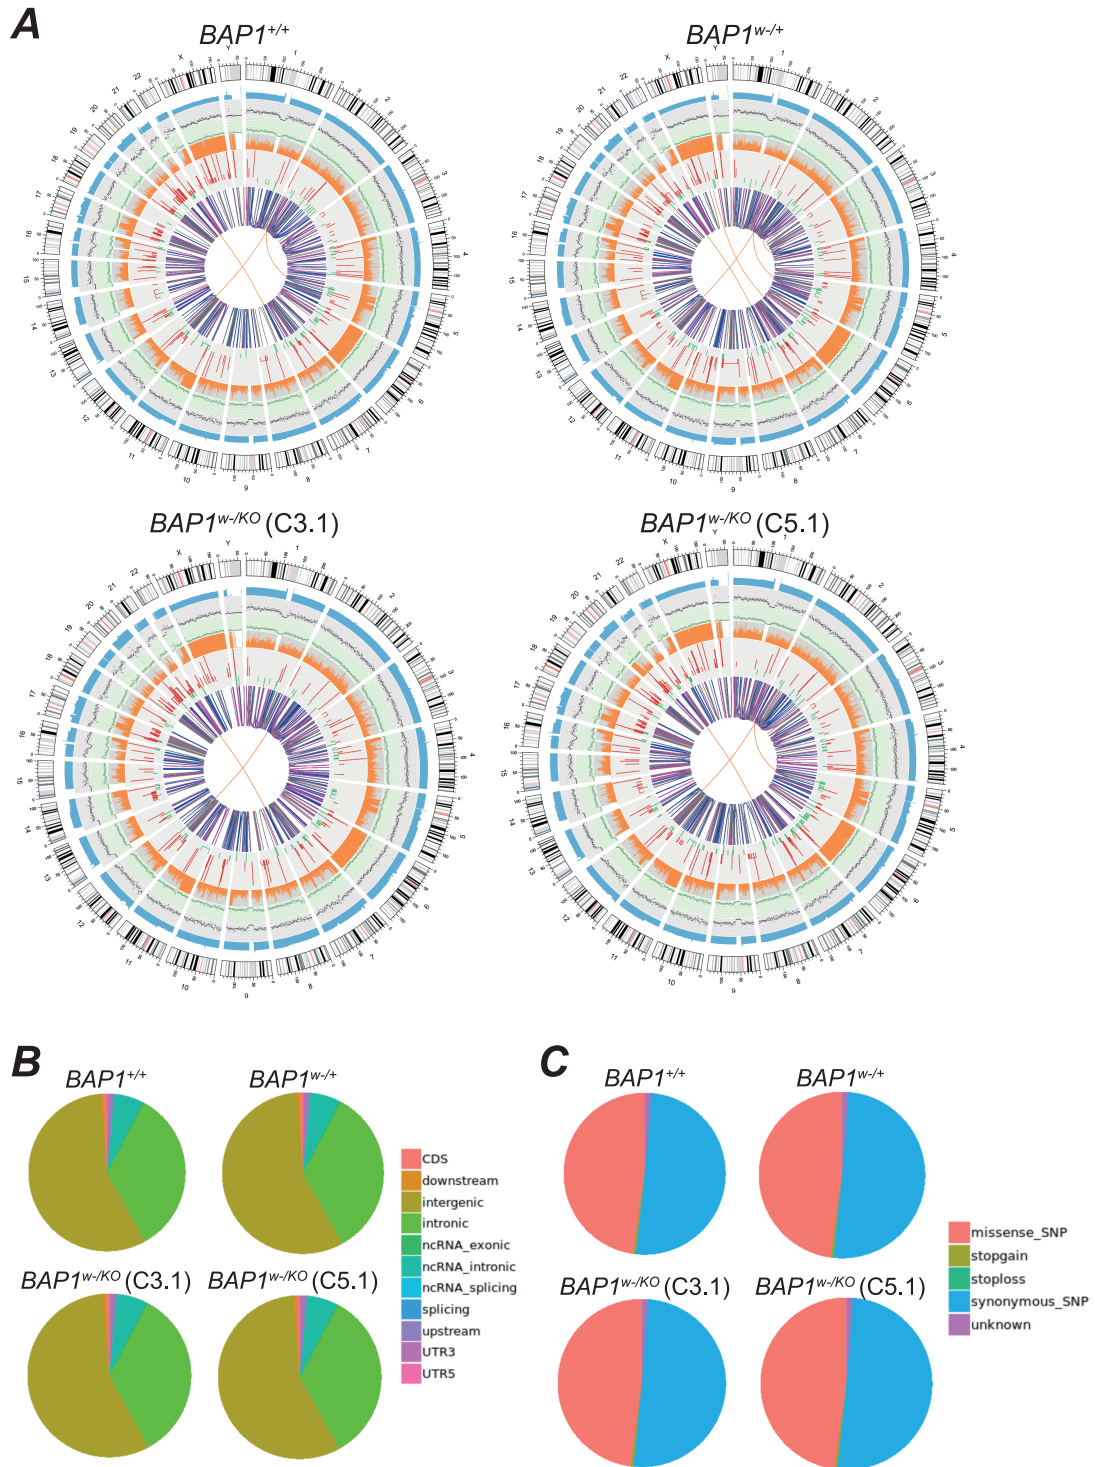

**Supplementary Figure S4. Whole genome sequencing (WGS) of gene-edited MeT5A.** WGS was compared for the parental MeT5A-*BAP1*<sup>+/+</sup> cells, the haplo-insufficient *BAP1*<sup>w/+</sup> clone and the two double-mutant *BAP1*<sup>w/KO</sup> clones C3.1 and C5.1. **A**, Circos plots for each cell line summarising from the outside ring inwards: chromosome information; read coverage (blue bars, 0.5Mbp); InDel density (black dots, 1Mbp); SNP density (green dots, 1Mbp); proportion homozygous SNP (orange bars, 1Mbp) or heterozygous SNP (grey); CNV inference (gain red, loss green); SV inference in exonic and splicing regions (BND orange, INS green, DEL grey, DUP pink, INV blue). **B & C**, Number of SNPs in different genomic regions (**B**) and number of different types of SNPs within coding regions (**C**).

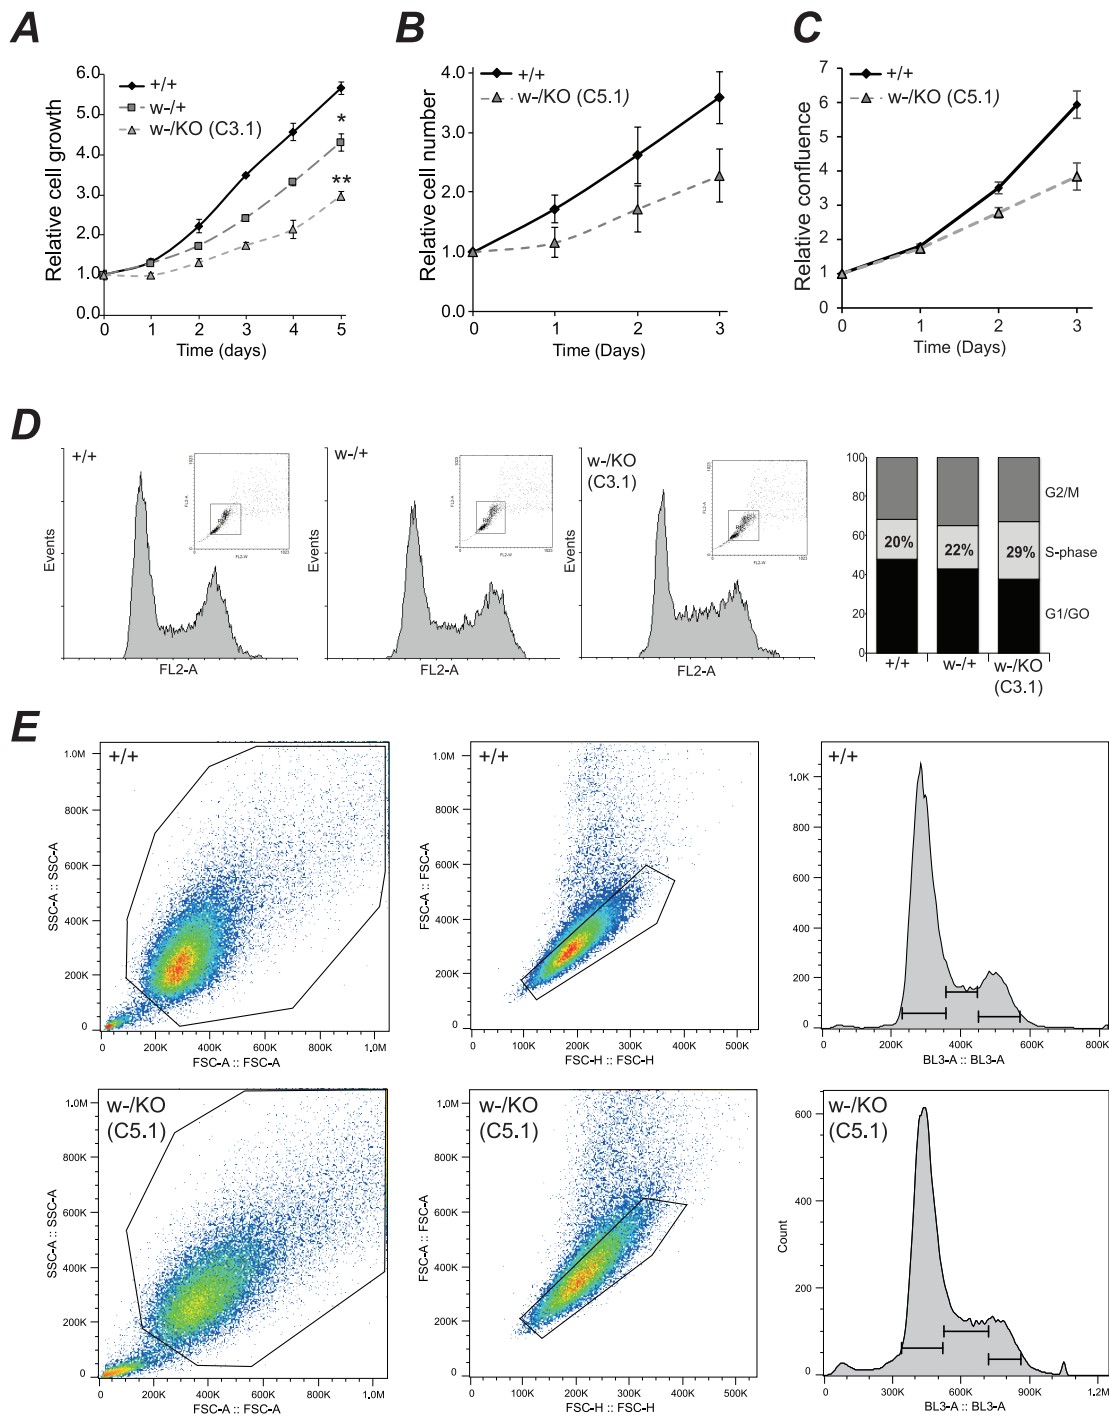

### Supplementary Figure S5. Proliferative profiles for gene-edited MeT5A.

**A-C**, BAP1-deficiency slows proliferation of MeT5A cells. **A**, ATP-based luciferase assay for MeT5A-*BAP1*<sup>w-/+</sup> and *BAP1*<sup>w-/KO</sup> clone C3.1; mean data from 3 independent experiments, error bars SD, \**P*<0.05 or \*\**P*<0.01 compared to MeT5A-*BAP1*<sup>+/+</sup> by one-way ANOVA and Dunnett post-hoc test. **B & C**, Proliferation of *BAP1*<sup>w-/KO</sup> C5.1 was assessed by direct cell counts (**B**) and live imaging of cell confluence (**C**). **D & E**, BAP1-deficiency causes MeT5A cells to accumulate in S-phase. Representative flow cytometry for MeT5A-*BAP1*<sup>w-/+</sup> and *BAP1*<sup>w-/KO</sup> clone C3.1 (**D**) and supporting data for *BAP1*<sup>w-/KO</sup> clone C5.1 (**E**).

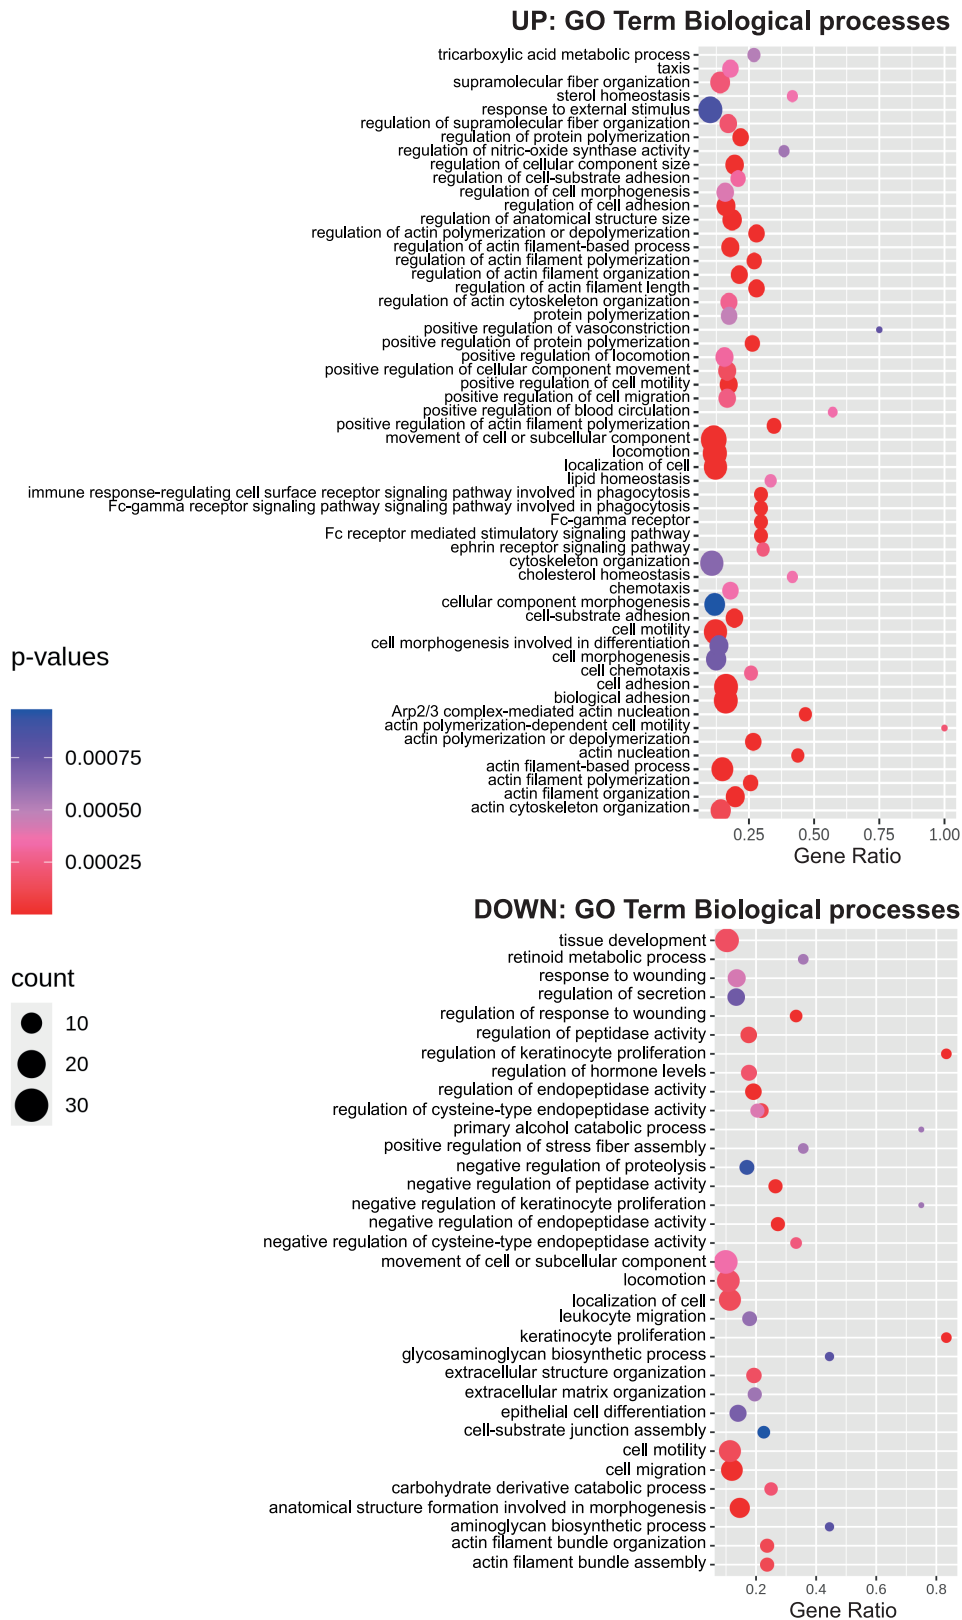

**Supplementary Figure S6. Enriched GO terms in gene-edited MeT5A SILAC-MS.** Proteins with differential expression of >1.5-fold between MeT5A-*BAP1*<sup>W/-KO</sup> C5.1 and parental *BAP1*<sup>+/+</sup> was analysed and visualised separately for the upregulated or down-regulated proteins using ProteoRE. Enrichment of Biological Process GO Terms is shown relative to all proteins identified in the SILAC-MS experiments, using Fisher's exact test with Benjamini-Hochberg correction. Significance of pathway enrichment is indicated by the colour scale, enrichment on the x-axis, and number of differentially expressed proteins within the enriched pathway by bubble size (count).

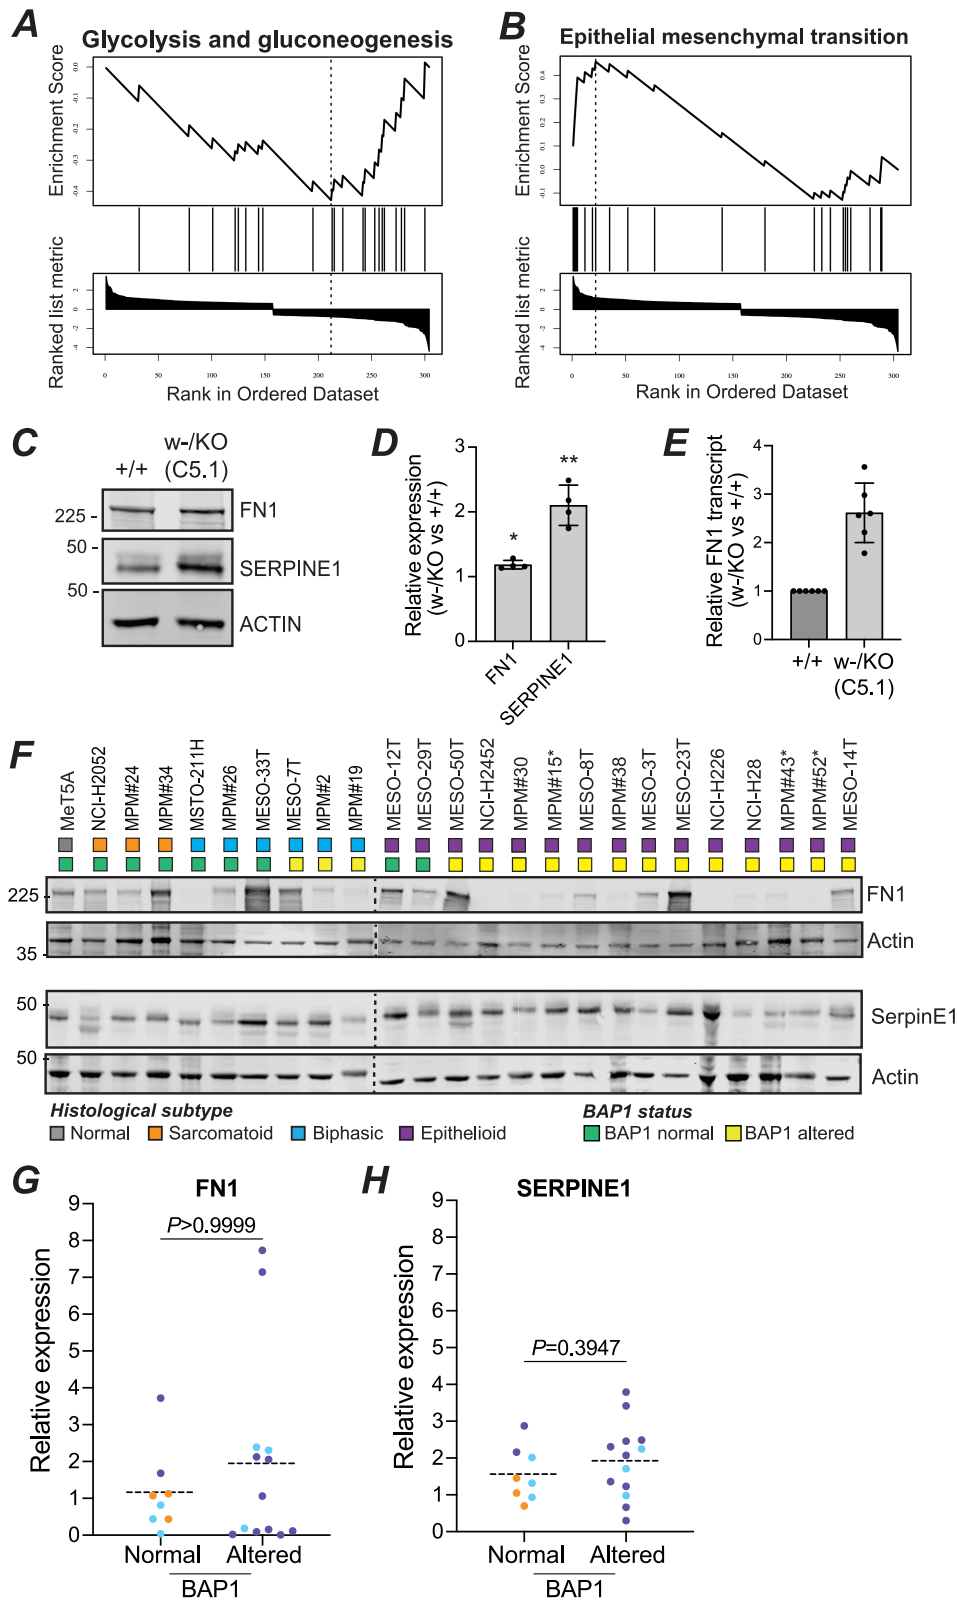

**Supplementary Figure S7. Enriched KEGG pathways in gene-edited Met5A SILAC-MS include EMT.**

**A-B**, Gene Set Enrichment Analysis of KEGG pathways highlights glycolysis/gluconeogenesis (**A**) and epithelial mesenchymal transition (**B**) in gene-edited Met5A. **C-E**, Selected EMT markers are increased in *BAP1*<sup>w-/KO</sup> C5.1 cells. Representative immunoblot (**C**) and protein expression relative to *BAP1*<sup>+/+</sup> Met5A (**D**); mean of 4 independent experiments, error bars SD, one sample t-test \**P* = 0.0118, \*\**P* = 0.0058. Relative FN1 mRNA expression (**E**); mean of 6 independent experiments, error bars SD, one sample t-test \*\**P* = 0.0013. **F-H**, FN1 and SERPINE1 protein levels do not stratify by BAP1 status in an MPM cell panel. Representative immunoblot (**F**) and BAP1-stratified protein expression for FN1 (**G**) and SERPINE1 (**H**); bar indicates mean, statistical analyses unpaired t-test. Key indicates histological subtype and BAP1-status. Note: \*MPM#15, MPM#43 and MPM#52 cell lines were excluded from the study after issues revealed by STR profiling. Supporting data, Supplementary Fig. S10.

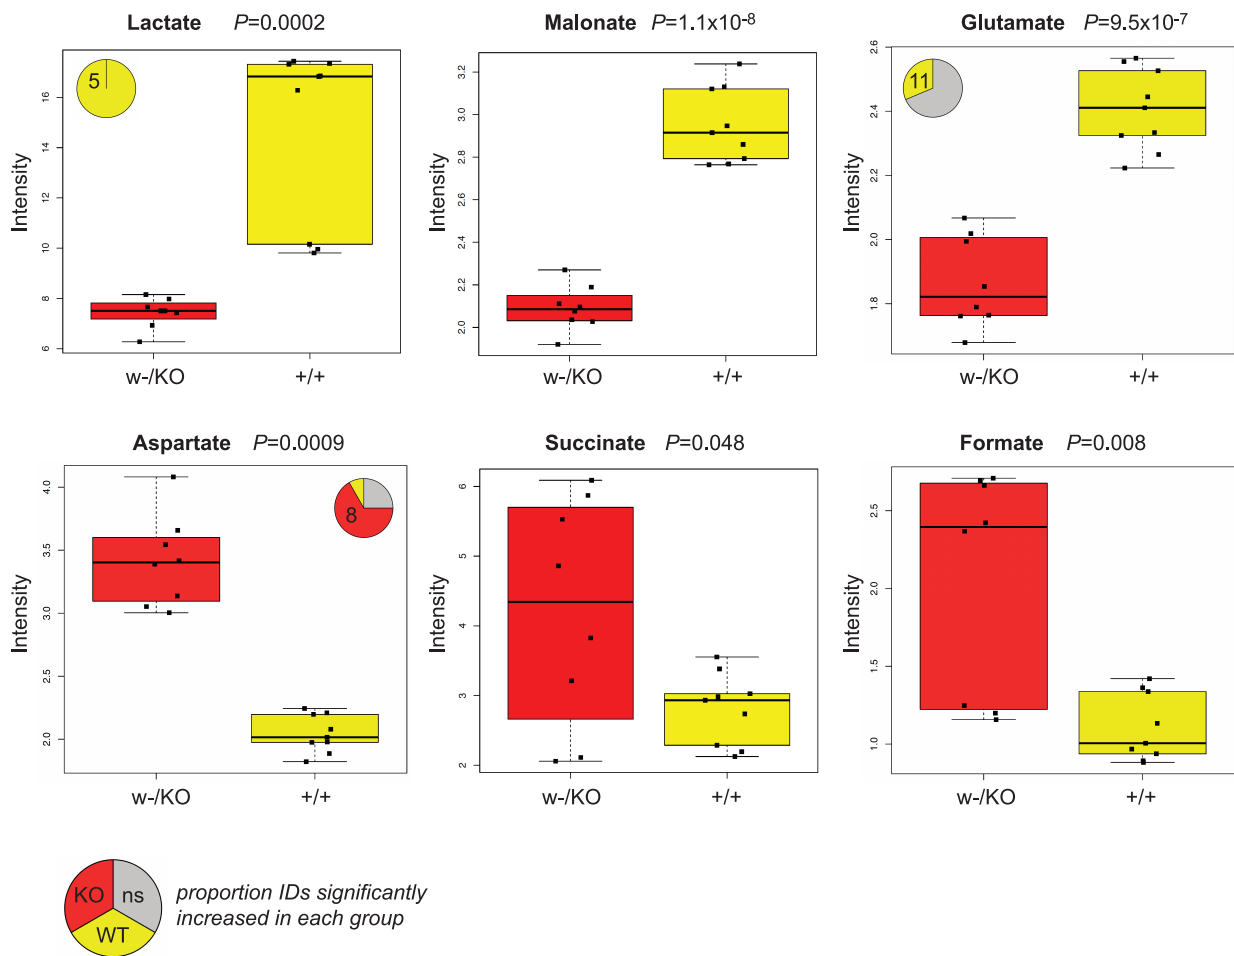

**Supplementary Figure S8. Metabolite responses to BAP1 mutation in isogenic MeT5A.** Box plots for named metabolites identified by NMR that were significantly modulated in MeT5A-*BAP1*<sup>w-/KO</sup> C5.1 relative to *BAP1*<sup>+/+</sup> cells. Data represent 3 technical replicates for 3 independent extracts of each cell line. Statistical analysis by t-test. Where metabolites were identified more than once, pie charts summarise the proportion of IDs with significant upregulation in *BAP1*<sup>w-/KO</sup> C5.1 or *BAP1*<sup>+/+</sup> MeT5A, or no significant difference (ns).



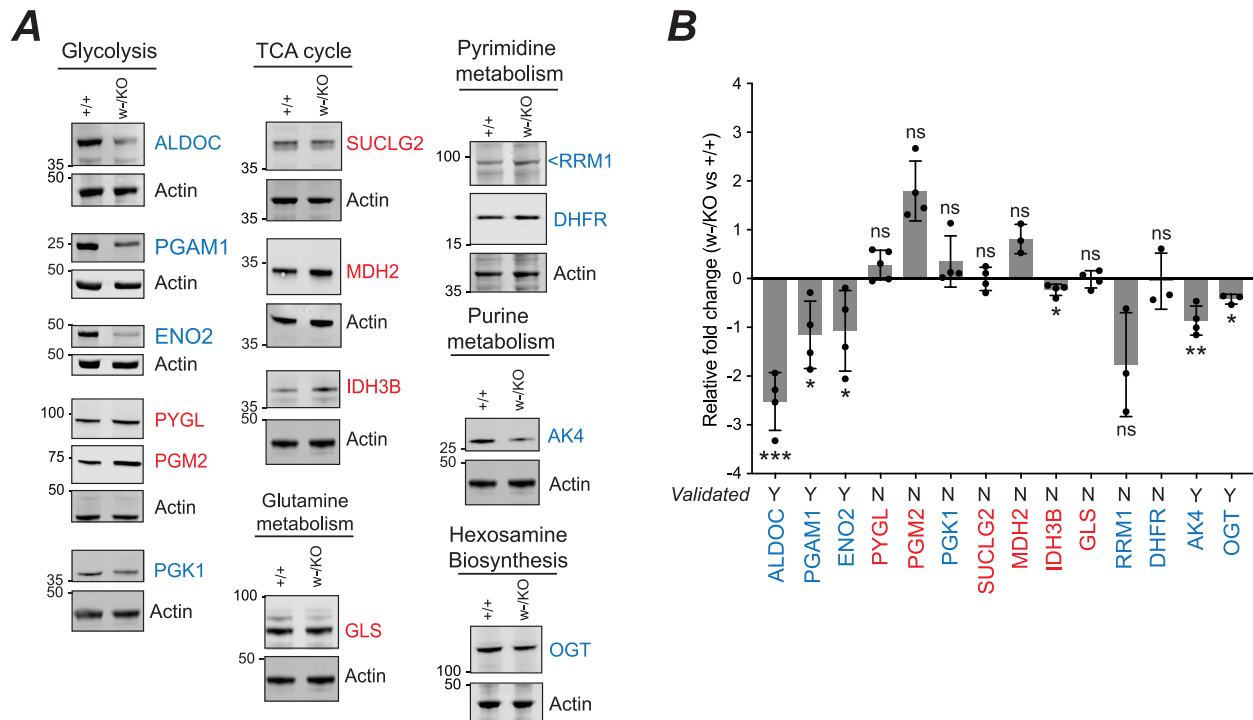

**Supplementary Figure S9. Immunoblotting for differentially expressed metabolic enzymes identified by SILAC-MS in isogenic MeT5A cell lines.**

Representative blots (**A**) and mean values (**B**) for 3 independent lysates from unlabelled MeT5A cells; error bars SD, one sample t-test on non-log transformed data. Colour coding indicates proteins that were up-regulated (red) or down-regulated (blue) by SILAC-MS in MeT5A-*BAP1*<sup>w-/KO</sup> C5.1 relative to *BAP1*<sup>+/+</sup> cells. Responses identified by MS and validated by immunoblotting are indicated in panel **B**.

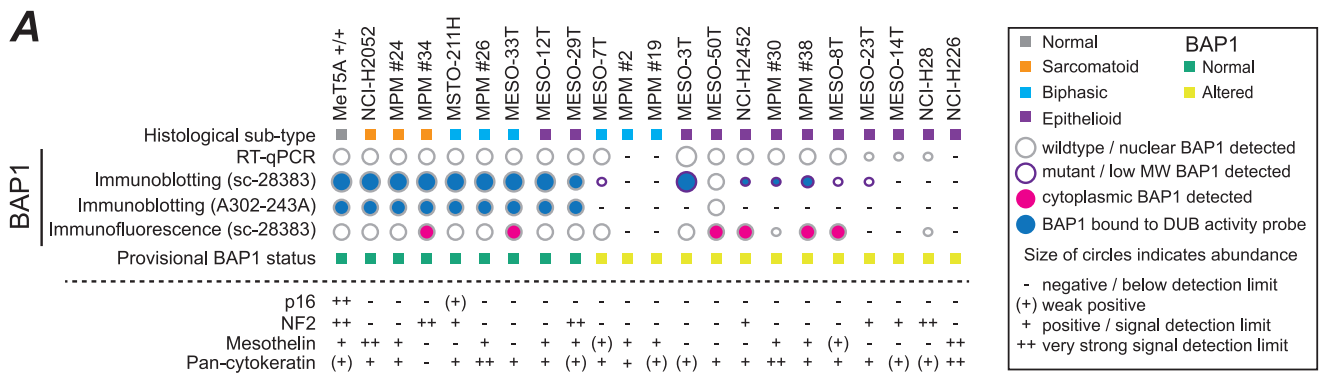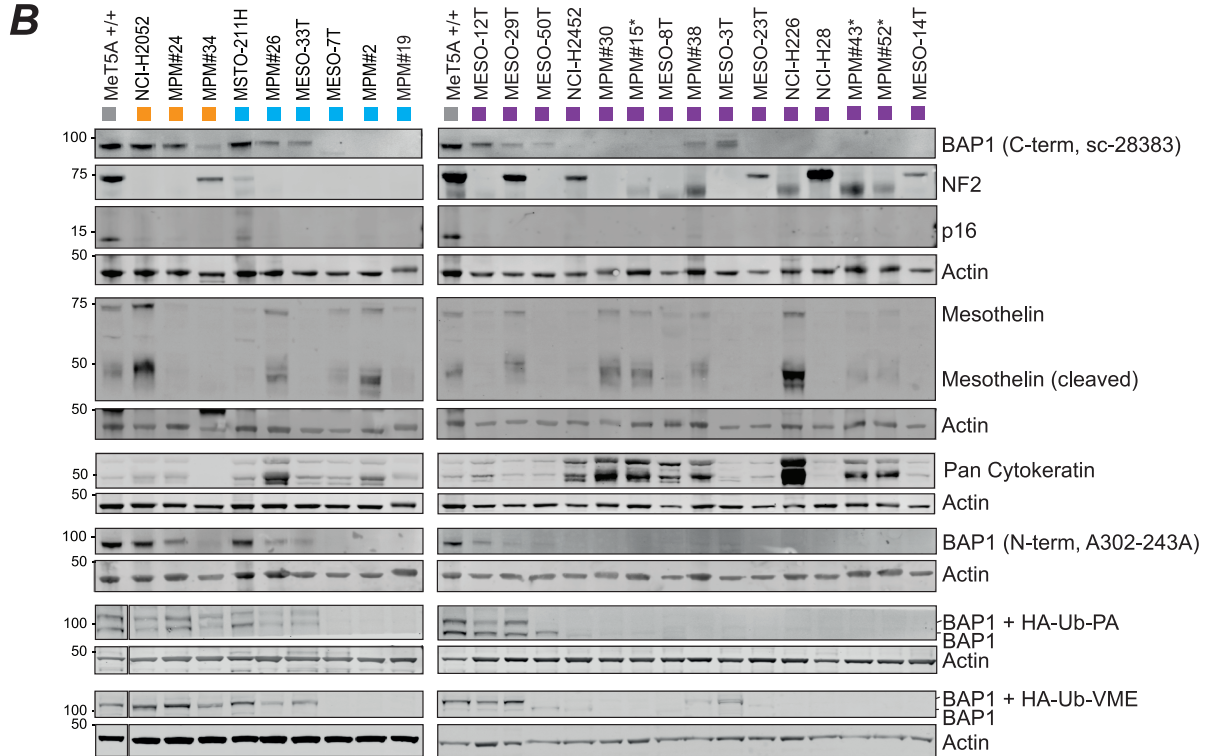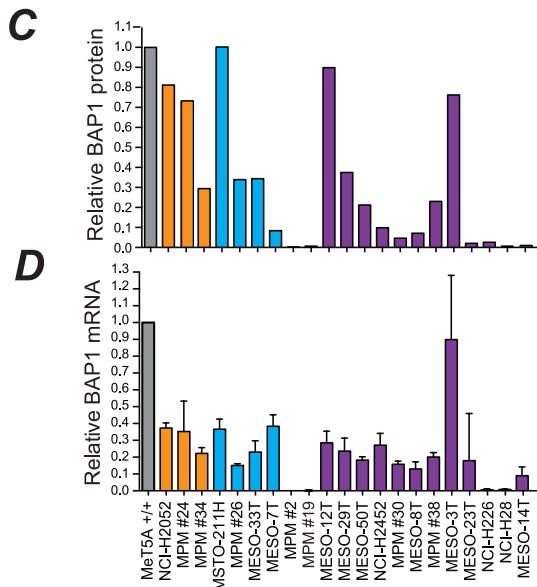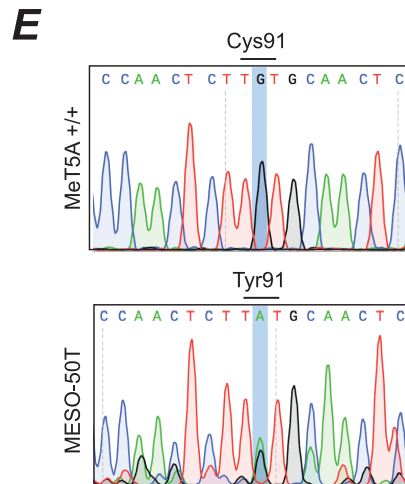

**Supplementary Figure S10. Characterisation of BAP1-status for MPM cell panel.**

**A**, Quilt map summarizing characterisation of MPM cell line. Provisional BAP1 status determined by multiple methods as summarised in key, and expression of other MPM markers screened; supporting data in subsequent panels. **B-C**, Immunoblotting for BAP1 and other MPM markers. Representative blots (**B**) and quantification of BAP1 (**C**). Interaction of catalytic competent BAP1 with HA-Ub-PA or -VME produces 10kDa shift in BAP1 immunoreactive band; ubiquitin activity probes incubated with non-denaturing cell lysates (15µg protein, 45 min, 1:100 probe:protein). **D**, Mean BAP1 mRNA expression determined by qRT-PCR; normalised to actin relative to MetT5A-BAP1<sup>+/+</sup> from 3 independent experiments, error bars SD. **E**, BAP1 in MESO-50T did not react with the ubiquitin activity probes (panel B) and sequencing of *BAP1* identified a G to A point substitution at CDS 272 (NM\_004656) that converts the catalytic cysteine to a tyrosine (C91Y), a somatic mutation that has been reported in both MPM and renal clear cell carcinoma tissues (COSMIC). Note: \*MPM#15, MPM#43 and MPM#52 cell lines were excluded from the study as issues revealed by STR profiling.

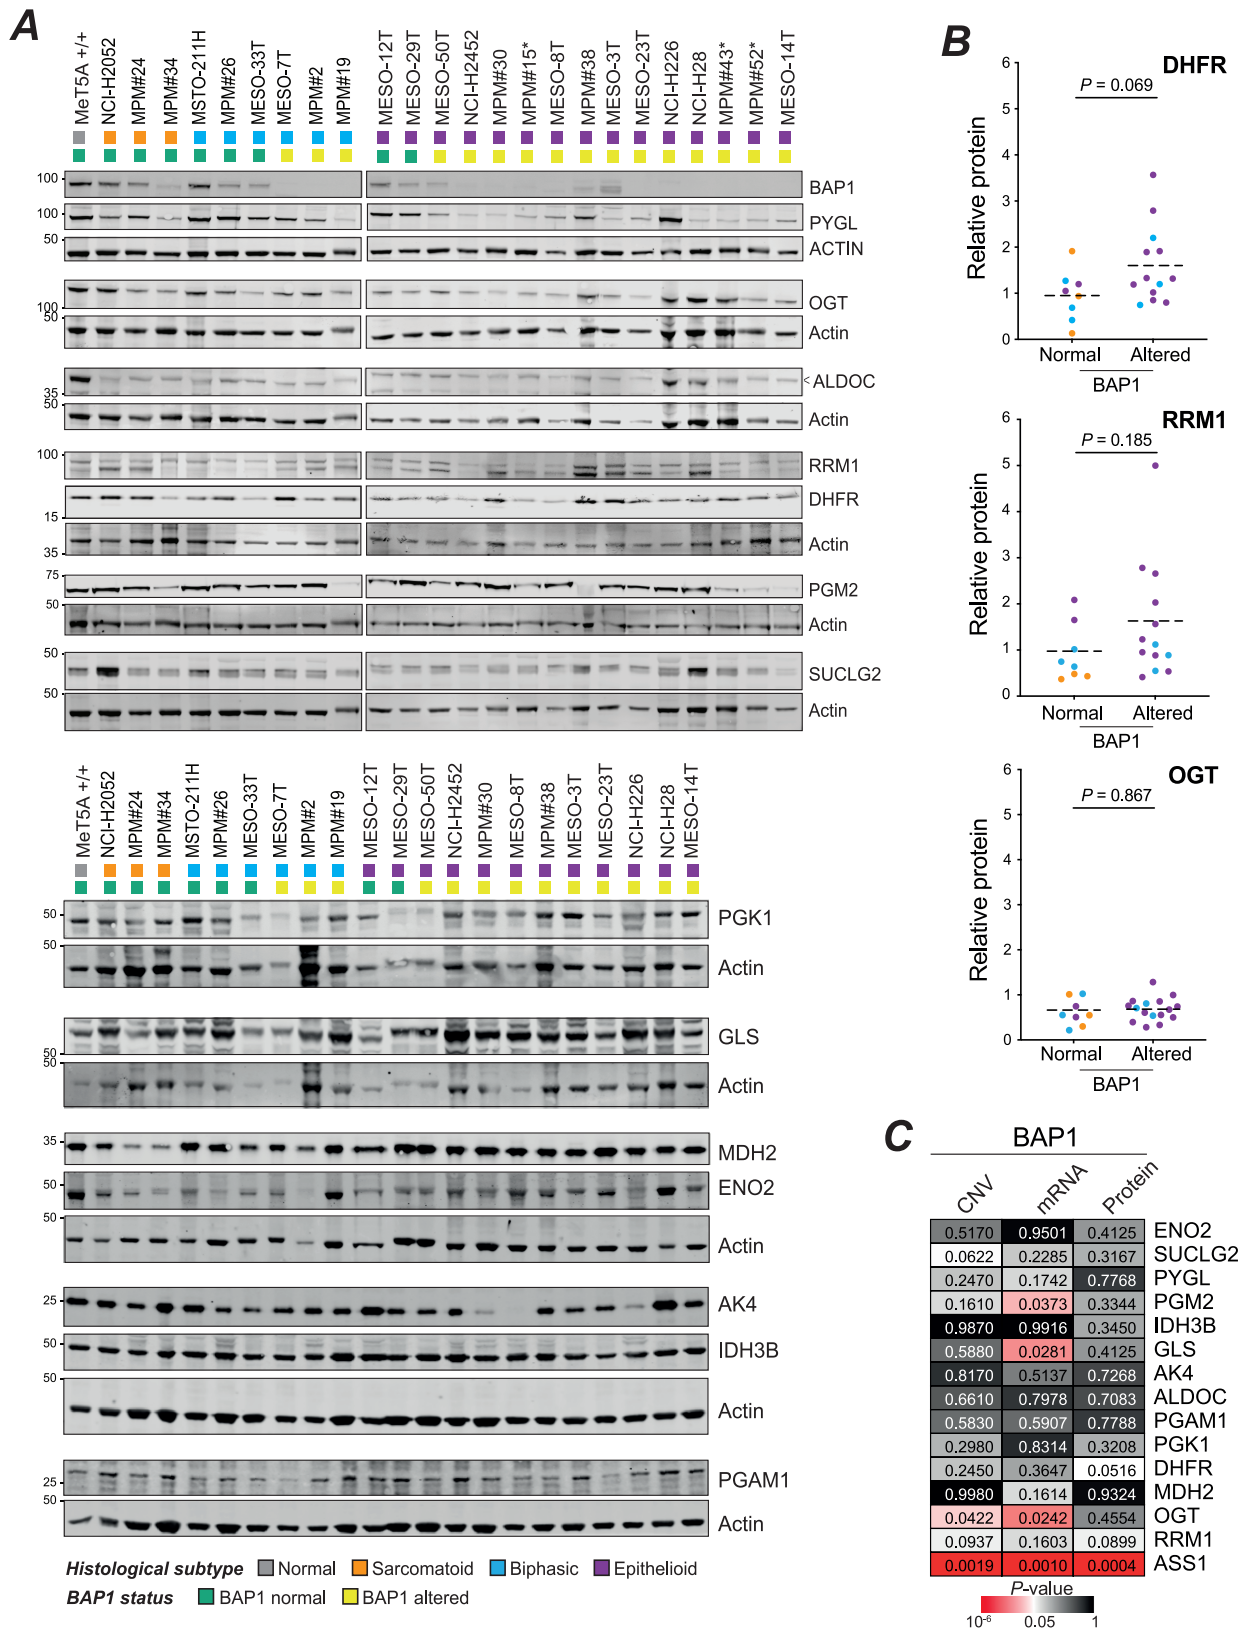

**Supplementary Figure S11. Evaluating correlation between BAP1 and selected metabolic enzymes in a panel of MPM cell lines and the TCGA MESO pan-cancer dataset.**

**A-B**, Immunoblotting of MPM cell lines for metabolic enzymes identified by SILAC-MS in isogenic MeT5A cells. Representative blots (**A**) and plots illustrating BAP1-stratification for selected enzymes (**B**). Statistical analyses: DHFR & OGT, unpaired t-test; RRM1 Mann-Whitney. Key indicates histological subtype and BAP1-status. Note: \*MPM#15, MPM#43 and MPM#52 cell lines were excluded from the study as issues revealed by STR profiling.

**C**, ASS1 correlates most strongly with BAP1-status in the TCGA MESO cohort. Heatmap of Spearman correlation *P*-values between mRNA expression for metabolic enzymes of interest and ++ copy number variation (CNV; n=87), mRNA (n=87) and protein (RPPA, n=63) within the TCGA pan-cancer dataset for all MPM cases. The results in **C** are based upon data generated by the TCGA Research Network: <https://www.cancer.gov/tcga>.

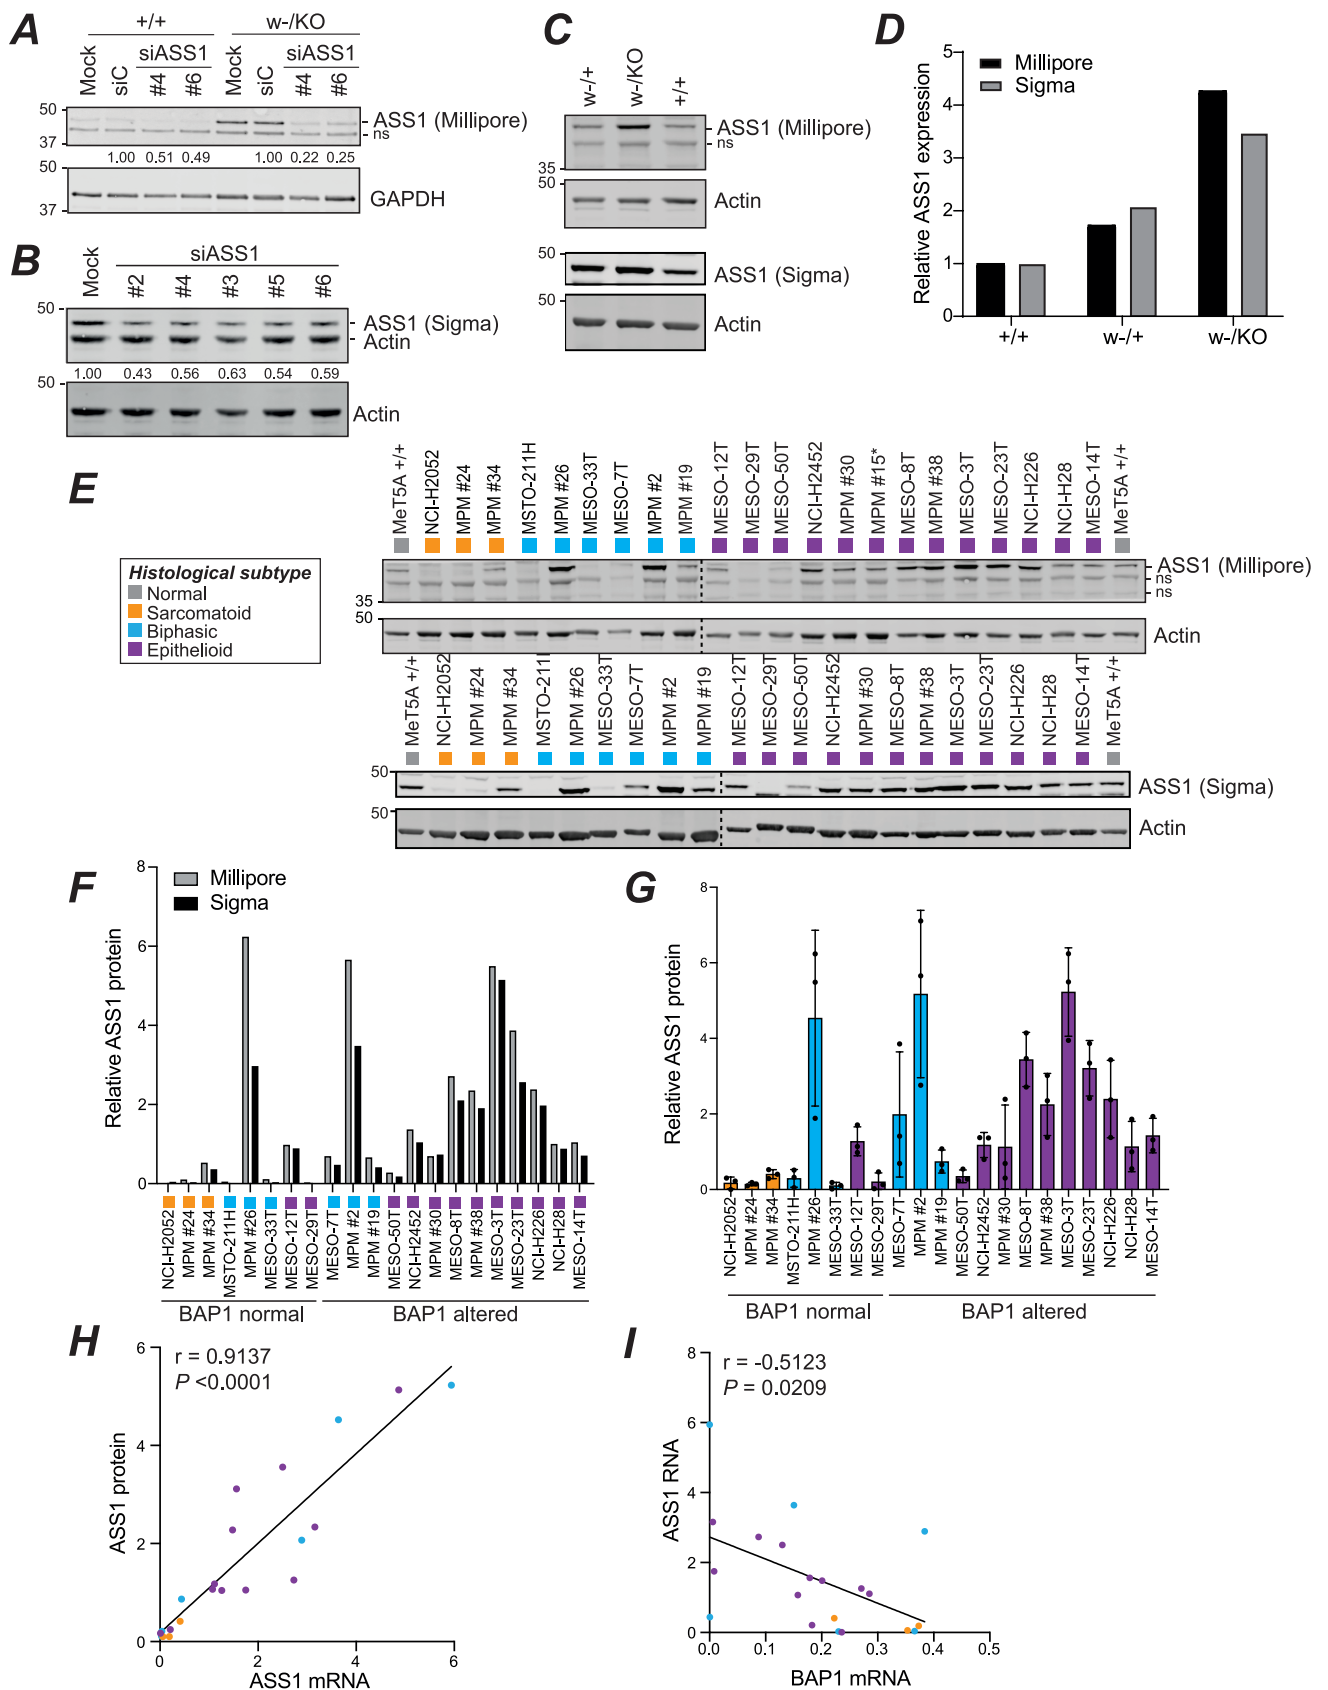

**Supplementary Figure S12. Validation of ASS1 response to BAP1 alteration.**

**A-B**, Validation of antibodies for immunoblotting by ASS1 knockdown in isogenic MeT5A cell lines: mouse anti-ASS1 (MABN704, Millipore; immunoblots Fig. 4) **(A)** and rabbit anti-ASS1 (HPA020934; Sigma Merck; IHC Fig. 5) **(B)**. **C-D**, ASS1 protein levels increase with sequential BAP1 mutation in isogenic MeT5A cells, by immunoblotting with either antibody. Representative blots **(C)** and quantification ( $n=1$ , **D**). **E-G**, Immunoblotting for ASS1 protein levels using either ASS1 antibody confirms higher expression in BAP1-altered MPM cell lines. Representative blots **(E)**, comparison of quantification for the two antibodies from these blots **(F)**, and mean values for detection of ASS1 (Millipore antibody) from 3 independent experiments, error bars SD, corresponding with data in Figure 4F-4H **(G)**. Colour coding indicates histological subtypes. Note: \*MPM#15 cell line excluded from study as issues revealed on STR profiling. **H**, ASS1 mRNA and protein expression (Millipore antibody) are positively correlated across the MPM cell panel. **I**, BAP1 and ASS1 mRNA expression are inversely correlated for the MPM cell panel. For F-I, histological subtype is indicated in panel E.

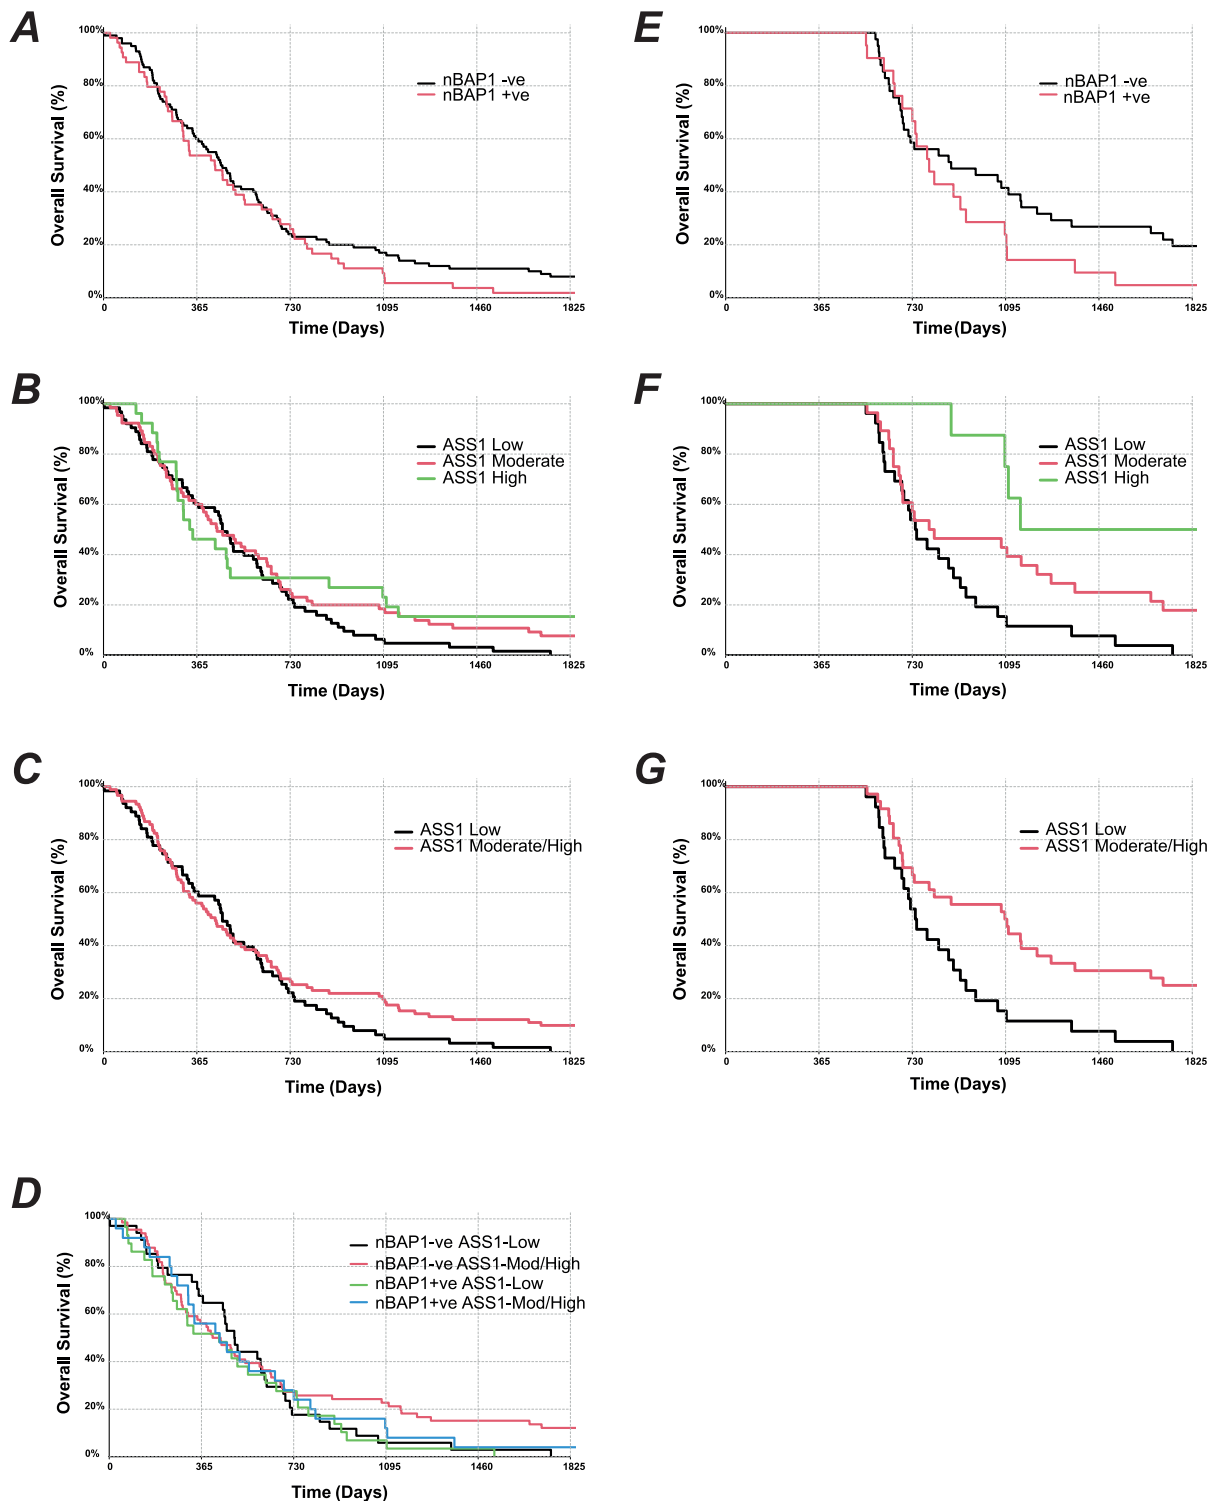

**Supplementary Figure S13. Improved prognosis for epithelioid MPM patients with loss of nBAP1 and increased expression of ASS1.**

**A-D**, Kaplan-Meier curves for all patients where overall survival data were available (n=154).

**E-G**, Kaplan-Meier curves for landmark analysis at 18 months (n=62). Patient samples are stratified as nBAP1-negative versus nBAP1-positive (**A, E**); ASS1 H-score categorised as ASS1<sub>L</sub>, ASS1<sub>M</sub> and ASS1<sub>H</sub> (**B, F**) or as ASS1<sub>L</sub> and ASS1<sub>M/H</sub> (**C, G**); and nBAP1-negative versus nBAP1-positive categorised by ASS1<sub>L</sub> and ASS1<sub>M/H</sub> (**D**). Supporting statistics for Cox models are in Supplementary Table S5.

**A**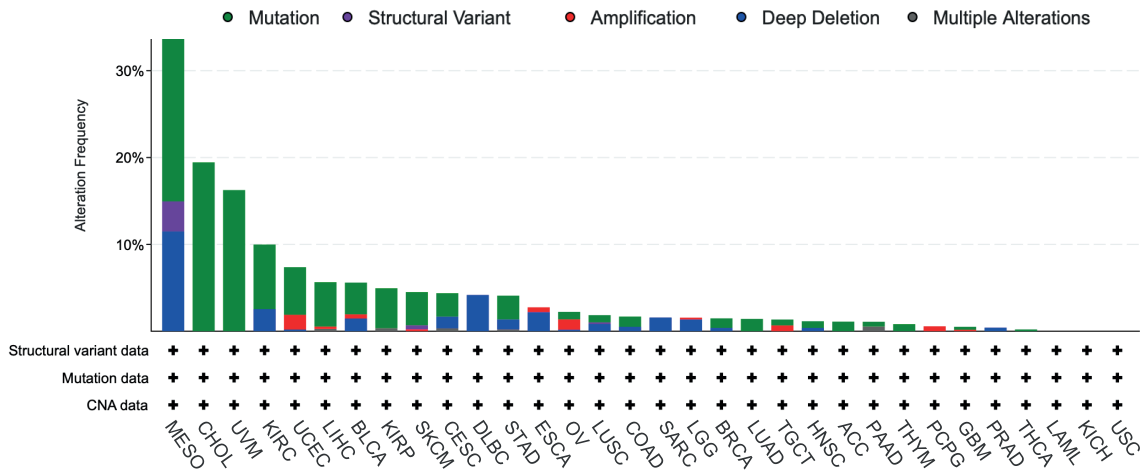**B**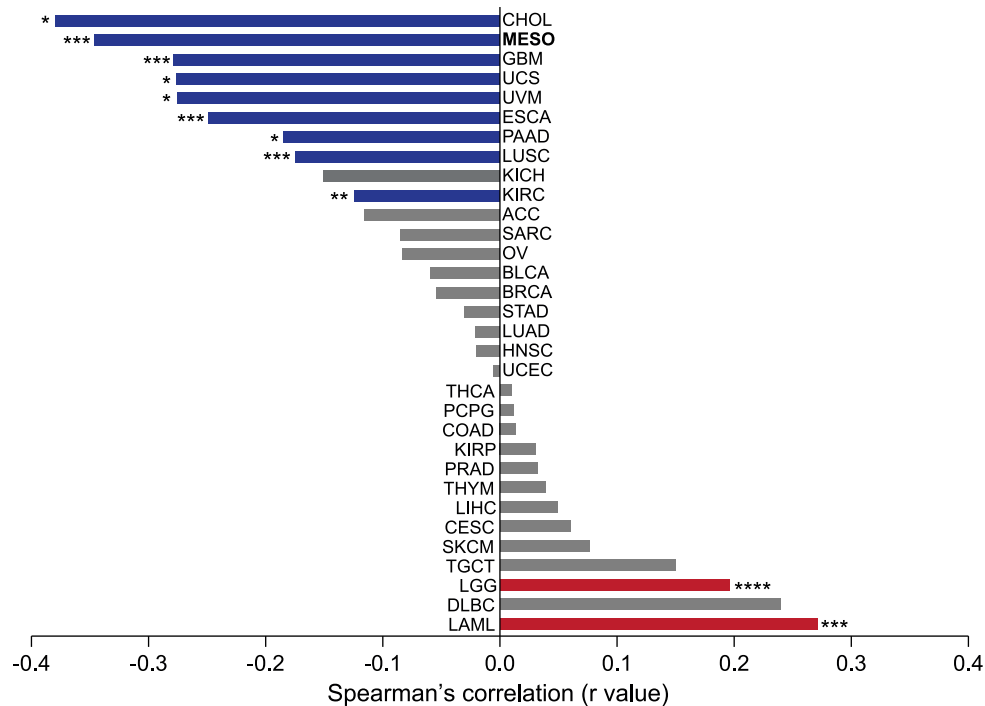

### Supplementary Figure S14. Relationship between *BAP1* and *ASS1* transcripts in the TCGA Pan-Cancer datasets for other cancer types.

**A**, *BAP1* is most frequently altered in mesothelioma (MESO), cholangiocarcinoma (CHOL), uveal melanoma (UVM) and kidney renal clear cell carcinoma (KIRC). Summary of the frequency of *BAP1* genetic alteration within the TCGA pan-cancer data from 32 cancer types exported from cBioportal. The TCGA study abbreviations are available at <https://gdc.cancer.gov/resources-tcga-users/tcga-code-tables/tcga-study-abbreviations>. **B**, Inverse correlation of *ASS1* and *BAP1* transcripts is evident in the cancers where *BAP1* is most frequently mutated. Butterfly plot illustrating Spearman's correlation between *ASS1* and *BAP1* transcripts in each cancer type. Studies with significant inverse (blue) or positive (red) correlations are indicated; \* $P < 0.05$ , \*\* $P = 0.01$ , \*\*\* $P = 0.005$ , \*\*\*\* $P = 0.001$ . Results are based upon data generated by the TCGA Research Network: <https://www.cancer.gov/tcga>.

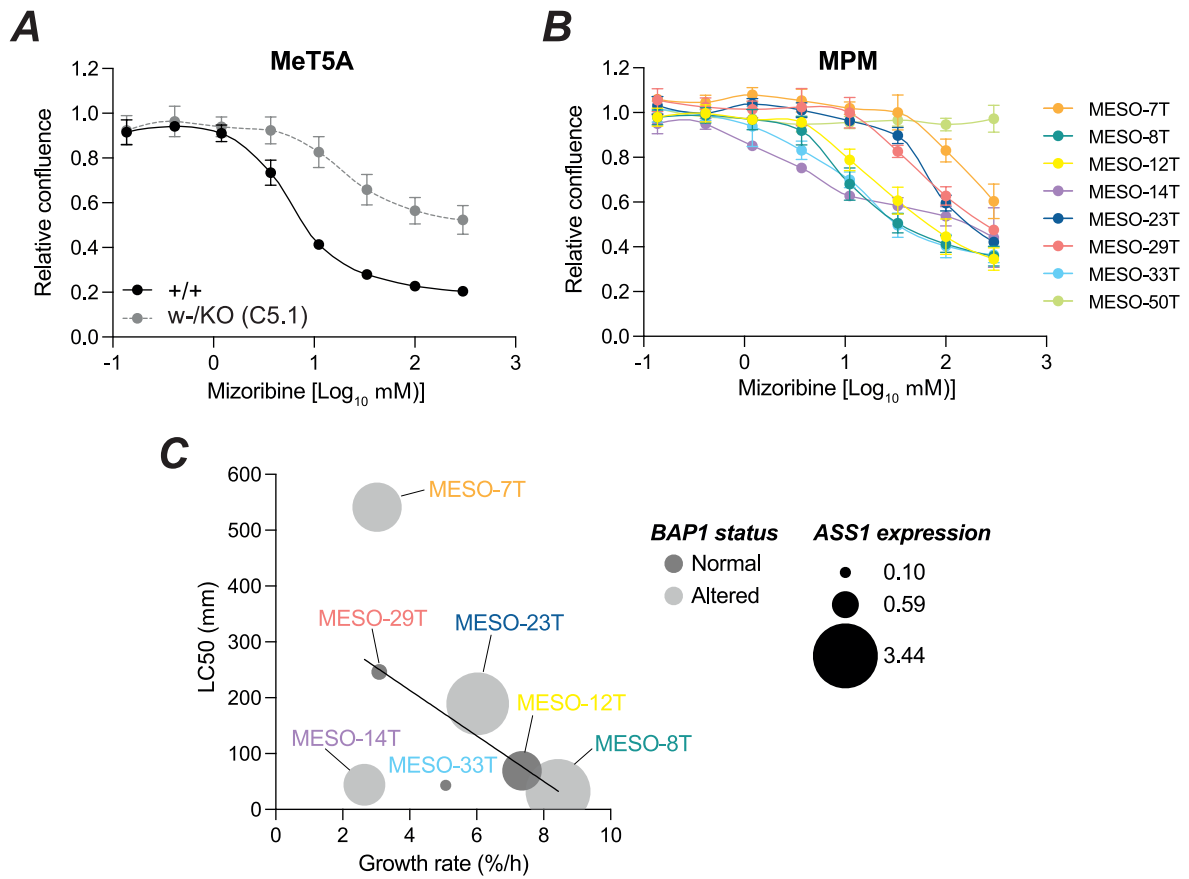

**Supplementary Figure S15. The influence of BAP1-status on response to inhibition of purine metabolism.**

**A-C**, Proliferative capacity rather than ASS1 or BAP1-status is more closely related to response to mizoribine. Relative confluence assessed by live imaging, mean of 3 independent experiments, error bars SD. Dose response curves for *BAP1*<sup>+/+</sup> and *BAP1*<sup>w-/KO</sup> MeT5A cells (**A**) or a panel of MPM cell lines (**B**) treated for 72h with mizoribine. Bubble plot shows the relationship between sensitivity to mizoribine and ASS1 level, BAP1-status, or growth rate (**C**).

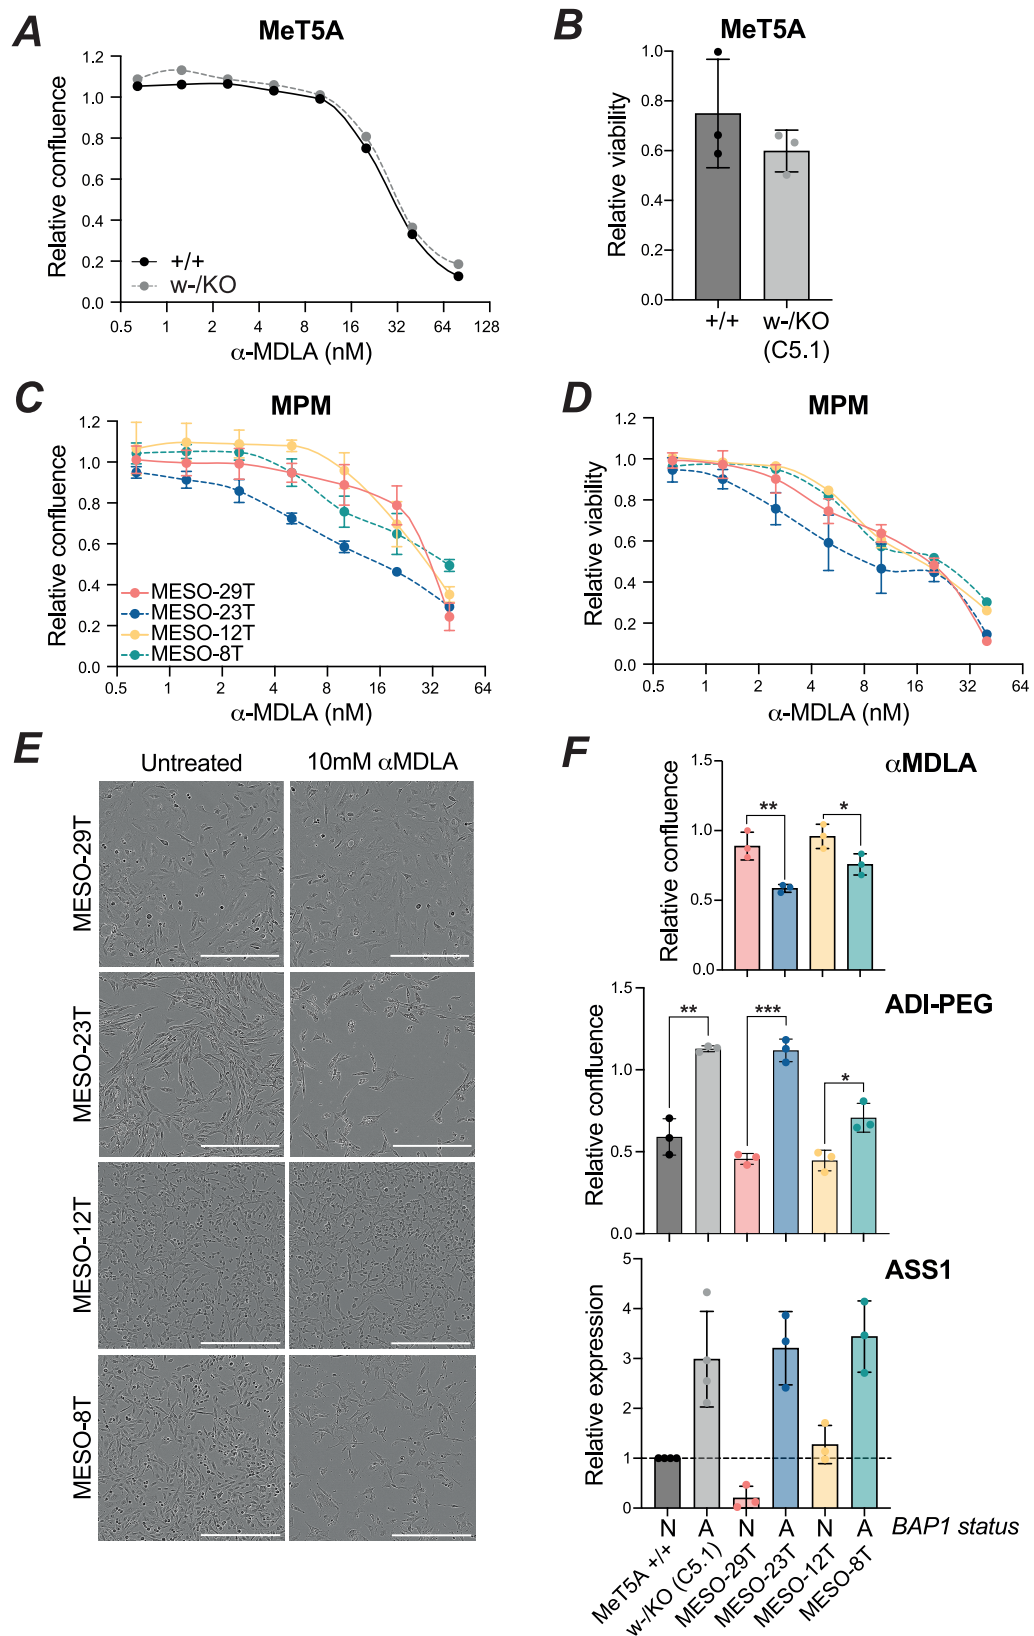

**Supplementary Figure S16. The influence of BAP1-status on response to ASS1 inhibition.**

**A-B**, MeT5A  $BAP1^{+/+}$  and  $BAP1^{w-/KO}$  cells were treated with the ASS1 inhibitor  $\alpha$ MDLA. Dose response for relative confluence assessed by live imaging at 72h (**A**),  $n=1$ . Cell viability assessed by ATP-based luciferase assay at 72h for 10mM  $\alpha$ MDLA (**B**), mean of 3 independent experiments, relative to vehicle control, error bars SD, unpaired t-test,  $P=0.327$  (n.s.). **C-E**, Dose response for 72h  $\alpha$ MDLA treatment in MPM cell lines: BAP1-normal, solid lines; BAP1-altered, dashed lines. Relative confluence assessed by live imaging (**C**) and relative viability assessed by ATP-based luciferase assay (**D**); mean of 3 independent experiments (2 for MESO-12T/8T viability), relative to vehicle control, error bars SD. Representative cell images at 72h for 10mM  $\alpha$ MDLA (**E**). **F**, MPM cells exhibit inverse sensitivity to  $\alpha$ MDLA and ADI-PEG20 that is related to ASS1 protein expression and BAP1-status. Bar charts show mean of 3 independent experiments, error bars SD, unpaired t-test.  $\alpha$ MDLA: 10mM at 72h; \* $P=0.039$ , \*\* $P=0.007$ . ADI-PEG20: 1000ng/mL at 72h; \* $P=0.014$ , \*\* $P=0.0012$ , \*\*\* $P=0.0001$ .
