# Supplementary material for: BAP1 Loss Is Associated with Higher ASS1 Expression in Epithelioid Mesothelioma: Implications for Therapeutic Stratification
Source: Mol Cancer Res. 2023 Jan 20;21(5):411–27. doi: 10.1158/1541-7786.MCR-22-0635 (PMC10150242; doi:10.1158/1541-7786.MCR-22-0635)
Supplement: Supplementary Table S2 — WGS MeT5A isogenics [file mcr-22-0635_supplementary_table_s2_suppst2.xlsx]

## Sheet: Info
Cell Line	BAP1 genotype	Name	WGS File Name	Worksheet differential SNPs versus BAP1wt_C2
MeT5A	+/+	Parental	BAP1wt_C2
MeT5A	w-/+	Haplo	BAP1haplo_C5	BAP1haplo_C5.strelka_muTect.som
MeT5A	w-/KO	C3.1	BAP1mut_C3_1	BAP1mut_C3_1.strelka_muTect.som
MeT5A	w-/KO	C5.1	BAP1mut_C5_1	BAP1mut_C5_1.strelka_muTect.som
				Key
				Mutation Assessor - normal (<1.95,N)
				Mutation Assessor - medium (>1.95,N)
				Mutation Assessor - high (>3.5H)

## Sheet: WGC qc.summary
Sample name	Raw Reads	Raw data(G)	Effective(%)	Error(%)	Q20(%)	Q30(%)	GC(%)
BAP1wt_C2	361553986	108.47	99.87	0.03	96.11	89.52	40.79
BAP1haplo_C5	336114444	100.83	99.88	0.03	95.68	89.29	40.73
BAP1mut_C3_1	277765982	83.33	99.88	0.03	96.04	90	40.76
BAP1mut_C3_1	39370491	11.81	99.86	0.03	97.38	92.69	41.19
BAP1mut_C5_1	331880602	99.56	99.86	0.03	96.12	89.52	40.79

## Sheet: WGS Mapping_summary
Sample	BAP1wt_C2	BAP1haplo_C5	BAP1mut_C3_1	BAP1mut_C5_1
Total	722183414 (100%)	671403022 (100%)	633520784 (100%)	662826032 (100%)
Duplicate	183055961 (25.41%)	123154972 (18.39%)	122100066 (19.31%)	166024117 (25.10%)
Mapped	720436270 (99.76%)	669715791 (99.75%)	632182105 (99.79%)	661413552 (99.79%)
Properly mapped	711408766 (98.51%)	660838522 (98.43%)	623846402 (98.47%)	649641526 (98.01%)
PE mapped	719738380 (99.66%)	669061382 (99.65%)	631682622 (99.71%)	660809142 (99.70%)
SE mapped	1395780 (0.19%)	1308818 (0.19%)	998966 (0.16%)	1208820 (0.18%)
With mate mapped to a different chr	5289646 (0.73%)	5424196 (0.81%)	5145178 (0.81%)	8149836 (1.23%)
With mate mapped to a different chr ((mapQ>=5))	2595949 (0.36%)	2784199 (0.41%)	2903493 (0.46%)	5376438 (0.81%)
Average_sequencing_depth	36.15	33.62	31.77	33.15
Coverage	0.9969	0.9968	0.9913	0.9966
Coverage_at_least_4X	0.9937	0.9934	0.9877	0.9927
Coverage_at_least_10X	0.9801	0.978	0.9694	0.9754
Coverage_at_least_20X	0.8849	0.8688	0.8414	0.8467

## Sheet: BAP1 genotype SNP
Variant type	Sample	CHROM	POS	ID	REF	ALT	QUAL	FILTER	GeneName	Func	Gene	GeneDetail	ExonicFunc	AAChange	Gencode	cytoBand	wgRna	genomicSuperDups	Repeat	avsnp150	cosmic70	CLNALLELEID	CLNDN	CLNDISDB	CLNREVSTAT	CLNSIG	gwasCatalog	1000g2015aug_eas	1000g2015aug_sas	1000g2015aug_eur	1000g2015aug_afr	1000g2015aug_amr	1000g2015aug_all	esp6500siv2_all	ExAC_ALL	ExAC_AFR	ExAC_AMR	ExAC_EAS	ExAC_FIN	ExAC_NFE	ExAC_OTH	ExAC_SAS	gnomad_exome_AF	gnomad_exome_AF_raw	gnomad_exome_AF_afr	gnomad_exome_AF_sas	gnomad_exome_AF_amr	gnomad_exome_AF_eas	gnomad_exome_AF_nfe
SNP	C2 WT
	C5 haplo	chr3	52407318	rs587776879	T	C	443.77	PASS	BAP1	splicing	NM_004656	NM_004656:exon8:c.438-2A>G	.	.	ENST00000460680.5,ENST00000296288.9	3p21.1	.	.	.	rs587776879	.	39257	Tumor_susceptibility_linked_to_germline_BAP1_mutations	MedGen:C3280492,OMIM:614327,Orphanet:ORPHA289539	no_assertion_criteria_provided	Pathogenic	.	0	0	0	0	0	0	0	0	0	0	0	0	0	0	0	0	0	0	0	0	0	0
	C3.1 mutant	chr3	52407318	rs587776879	T	C	664.77	PASS	BAP1	splicing	NM_004656	NM_004656:exon8:c.438-2A>G	.	.	ENST00000296288.9,ENST00000460680.5	3p21.1	0	.	.	rs587776879	.	39257	Tumor_susceptibility_linked_to_germline_BAP1_mutations	MedGen:C3280492,OMIM:614327,Orphanet:ORPHA289539	no_assertion_criteria_provided	Pathogenic	.	0	0	0	0	0	0	0	0	0	0	0	0	0	0	0	0	0	0	0	0	0	0
	C5.1 mutant	chr3	52407318	rs587776879	T	C	312.77	PASS	BAP1	splicing	NM_004656	NM_004656:exon8:c.438-2A>G	.	.	ENST00000296288.9,ENST00000460680.5	3p21.1	.	.	.	rs587776879	.	39257	Tumor_susceptibility_linked_to_germline_BAP1_mutations	MedGen:C3280492,OMIM:614327,Orphanet:ORPHA289539	no_assertion_criteria_provided	Pathogenic	.	.	.	.	.	.	.	.	.	.	.	.	.	.	.	.	.	.	.	.	.	.	.
[truncated: 41 more columns]

## Sheet: BAP1 genotype SV
		Chr	Start	End	Ref	Alt	GeneName	Func	Gene	GeneDetail	ExonicFunc	AAChange	Gencode	cpgIslandExt	cytoBand	genomicSuperDups	Repeat	dgvMerged	RESOLUTION	CIEND	CIPOS	CT	INSLEN	PE	SR	SRQ	MAPQ	GT	GL	GQ	FT	RCL	CONSENSUS	CE	RC	RCR	RDCN	DR	DV	RR	RV	SVID	TCHR	TSTART	SVType
SV	C2 WT
	C5 haplo
	C3.1 mutant	chr3	52408262	52409272	0	0	BAP1	exonic	NM_004656	.	0	0	ENST00000296288.9,ENST00000460680.5	.	3p21.1	.	.	nsv834696,nsv834697,nsv954859	IMPRECISE	-410410	-410410	5to5	0	4	0	0	60	0/1	-14.9691,0,-146.969	150	PASS	44	na	na	142	56	3	26	4	0	0	INV00002231	na	na	INV
		chr3	52408262	52408262	0	0	BAP1	intronic	NM_004656	.	0	0	ENST00000460680.5,ENST00000296288.9	.	3p21.1	.	.	nsv834696,nsv954859,nsv834697	IMPRECISE	-410410	-410410	5to5	0	4	0	0	60	0/1	-14.9691,0,-146.969	150	PASS	44	na	na	142	56	3	26	4	0	0	INV00002231	na	na	breakpoint
		chr3	52409272	52409272	0	0	BAP1	intronic	NM_004656	.	0	0	ENST00000460680.5,ENST00000296288.9	.	3p21.1	.	.	nsv834696,nsv834697,nsv954859	IMPRECISE	-410410	-410410	5to5	0	4	0	0	60	0/1	-14.9691,0,-146.969	150	PASS	44	na	na	142	56	3	26	4	0	0	INV00002231	na	na	breakpoint
	C5.1 mutant	chr3	52409220	52410100	0	0	BAP1	exonic	NM_004656	.	0	0	ENST00000460680.5,ENST00000296288.9	CpG: 43	3p21.1	.	.	nsv834697,dgv2525n106,nsv834696,nsv954859,nsv1073643	PRECISE	-5,5	-5,5	3to3	0	6	8	0.964072	60	0/1	-34.6745,0,-44.6737	10000	PASS	45	AAGAAAATATACTCTAAGTGTGGGCACCCAGGAGGGGCCTTGTCACCCCAACCAATCAATACAGGATGACTTTGTGTCAGGATTAAAGCCAAGGACACATGCCCGCATCTGCTGTCCGACAGGCGGAAGACGAGCCCAGAGGCGGAGCAGGGCCGTCGCGCCTTG	1.96798	81	19	3	13	6	15	12	INV00002049	na	na	INV
		chr3	52409220	52409220	0	0	BAP1	intronic	NM_004656	.	0	0	ENST00000296288.9,ENST00000460680.5	.	3p21.1	.	.	nsv834697,nsv954859,nsv834696	PRECISE	-5,5	-5,5	3to3	0	6	8	0.964072	60	0/1	-34.6745,0,-44.6737	10000	PASS	45	AAGAAAATATACTCTAAGTGTGGGCACCCAGGAGGGGCCTTGTCACCCCAACCAATCAATACAGGATGACTTTGTGTCAGGATTAAAGCCAAGGACACATGCCCGCATCTGCTGTCCGACAGGCGGAAGACGAGCCCAGAGGCGGAGCAGGGCCGTCGCGCCTTG	1.96798	81	19	3	13	6	15	12	INV00002049	na	na	breakpoint
		chr3	52410100	52410100	0	0	BAP1	UTR5	NM_004656	NM_004656:c.-2220>0	0	0	ENST00000460680.5	CpG: 43	3p21.1	.	.	dgv2525n106,nsv834697,nsv1073643,nsv834696,nsv954859	PRECISE	-5,5	-5,5	3to3	0	6	8	0.964072	60	0/1	-34.6745,0,-44.6737	10000	PASS	45	AAGAAAATATACTCTAAGTGTGGGCACCCAGGAGGGGCCTTGTCACCCCAACCAATCAATACAGGATGACTTTGTGTCAGGATTAAAGCCAAGGACACATGCCCGCATCTGCTGTCCGACAGGCGGAAGACGAGCCCAGAGGCGGAGCAGGGCCGTCGCGCCTTG	1.96798	81	19	3	13	6	15	12	INV00002049	na	na	breakpoint

## Sheet: BAP1haplo_C5.strelka_muTect.som
CHROM	POS	ID	REF	ALT	QUAL	FILTER	GeneName	Func	Gene	GeneDetail	ExonicFunc	AAChange	Gencode	cytoBand	wgRna	genomicSuperDups	Repeat	avsnp150	cosmic70	CLNALLELEID	CLNDN	CLNDISDB	CLNREVSTAT	CLNSIG	gwasCatalog	1000g2015aug_eas	1000g2015aug_sas	1000g2015aug_eur	1000g2015aug_afr	1000g2015aug_amr	1000g2015aug_all	esp6500siv2_all	ExAC_ALL	ExAC_AFR	ExAC_AMR	ExAC_EAS	ExAC_FIN	ExAC_NFE	ExAC_OTH	ExAC_SAS	gnomad_exome_AF	gnomad_exome_AF_raw	gnomad_exome_AF_afr	gnomad_exome_AF_sas	gnomad_exome_AF_amr	gnomad_exome_AF_eas	gnomad_exome_AF_nfe	gnomad_exome_AF_fin	gnomad_exome_AF_asj
chr1	180832	.	T	C	.	PASS	.	intergenic	NR_039983,NR_128720	dist=40266;dist=7059	.	.	.	1p36.33	.	Score=0.988896;Name=chr1:10169	Score=528;Name="327:(ACCCTA)n(Simple_repeat)"	.	.	.	.	.	.	.	.	.	.	.	.	.	.	.	.	.	.	.	.	.	.	.	.	.	.	.	.	.	.	.	.
chr1	181351	.	C	T	.	PASS	.	intergenic	NR_039983,NR_128720	dist=40785;dist=6540	.	.	.	1p36.33	.	Score=0.988896;Name=chr1:10169	Score=3686;Name="328:TAR1(Satellite)"	.	.	.	.	.	.	.	.	.	.	.	.	.	.	.	.	.	.	.	.	.	.	.	.	.	.	.	.	.	.	.	.
chr1	269190	rs78787808	T	C	.	PASS	.	intergenic	NR_026823,NM_001005221	dist=62593;dist=181550	.	.	ENST00000424587.6	1p36.33	.	Score=0.992727;Name=chr1:88000	Score=695;Name="397:MIR(SINE)"	rs78787808	.	.	.	.	.	.	.	.	.	.	.	.	.	.	.	.	.	.	.	.	.	.	.	.	.	.	.	.	.	.	.
chr1	297053	.	G	C	.	PASS	.	intergenic	NR_026823,NM_001005221	dist=90456;dist=153687	.	.	ENST00000424587.6	1p36.33	.	Score=0.995559;Name=chr5:181341522,chr1:466590	.	.	.	.	.	.	.	.	.	.	.	.	.	.	.	.	.	.	.	.	.	.	.	.	.	.	.	.	.	.	.	.	.
chr1	297363	.	C	A	.	PASS	.	intergenic	NR_026823,NM_001005221	dist=90766;dist=153377	.	.	ENST00000424587.6	1p36.33	.	Score=0.995559;Name=chr1:466590,chr5:181341522	.	.	.	.	.	.	.	.	.	.	.	.	.	.	.	.	.	.	.	.	.	.	.	.	.	.	.	.	.	.	.	.	.
chr1	1137251	.	T	G	.	PASS	LINC01342	ncRNA_intronic	NR_038869	.	.	.	ENST00000416774.1	1p36.33	.	.	.	.	.	.	.	.	.	.	.	.	.	.	.	.	.	.	.	.	.	.	.	.	.	.	.	.	.	.	.	.	.	.	.
chr1	1212954	.	G	T	.	PASS	TNFRSF4	intronic	NM_003327	.	.	.	ENST00000379236.3	1p36.33	.	.	.	.	.	.	.	.	.	.	.	.	.	.	.	.	.	.	.	.	.	.	.	.	.	.	.	.	.	.	.	.	.	.	.
chr1	1213111	rs749945507	G	A	.	PASS	TNFRSF4	intronic	NM_003327	.	.	.	ENST00000379236.3	1p36.33	.	.	.	rs749945507	.	.	.	.	.	.	.	.	.	.	.	.	.	.	0.0001	0	0.0002	0	0	0.0001	0	9.203e-05	7.963e-05	7.193e-05	0	0.0001	3.111e-05	0	0.0001	0	0
chr1	1656921	.	G	A	.	PASS	CDK11B	intronic	NM_001291345,NM_001787,NM_033486,NM_033487,NM_033489,NM_033490	.	.	.	ENST00000629289.2,ENST00000340677.9,ENST00000629312.2,ENST00000317673.8,ENST00000407249.7,ENST00000341832.10,ENST00000626918.2,ENST00000618459.4,ENST00000412810.6	1p36.33	.	Score=0.971027;Name=chr1:1699616	.	.	.	.	.	.	.	.	.	.	.	.	.	.	.	.	.	.	.	.	.	.	.	.	.	.	.	.	.	.	.	.	.
chr1	2280618	.	A	C	.	PASS	SKI	intronic	NM_003036	.	.	.	ENST00000378536.4	1p36.33	.	.	.	.	.	.	.	.	.	.	.	.	.	.	.	.	.	.	.	.	.	.	.	.	.	.	.	.	.	.	.	.	.	.	.
chr1	2436087	.	T	C	.	PASS	.	intergenic	NM_002617,NM_001303012	dist=23516;dist=31372	.	.	.	1p36.32	.	.	.	.	.	.	.	.	.	.	.	.	.	.	.	.	.	.	.	.	.	.	.	.	.	.	.	.	.	.	.	.	.	.	.
chr1	2675168	.	G	A	.	PASS	TTC34	intronic	NM_001242672	.	.	.	ENST00000401095.6	1p36.32	.	Score=0.965704;Name=chr1:2658411	.	.	.	.	.	.	.	.	.	.	.	.	.	.	.	.	.	.	.	.	.	.	.	.	.	.	.	.	.	.	.	.	.
chr1	2990883	.	T	G	.	PASS	.	intergenic	NM_001242672,NM_080431	dist=201218;dist=30599	.	.	.	1p36.32	.	.	.	.	.	.	.	.	.	.	.	.	.	.	.	.	.	.	.	.	.	.	.	.	.	.	.	.	.	.	.	.	.	.	.
chr1	3052486	.	C	G	.	PASS	.	intergenic	NM_080431,NR_015440	dist=29583;dist=7131	.	.	.	1p36.32	.	.	.	.	.	.	.	.	.	.	.	.	.	.	.	.	.	.	.	.	.	.	.	.	.	.	.	.	.	.	.	.	.	.	.
chr1	3073823	.	G	C	.	PASS	PRDM16	intronic	NM_022114,NM_199454	.	.	.	ENST00000270722.9,ENST00000514189.5,ENST00000511072.5,ENST00000378391.6	1p36.32	.	.	.	.	.	.	.	.	.	.	.	.	.	.	.	.	.	.	.	.	.	.	.	.	.	.	.	.	.	.	.	.	.	.	.
chr1	3197534	.	G	A	.	PASS	PRDM16	intronic	NM_022114,NM_199454	.	.	.	ENST00000270722.9,ENST00000511072.5,ENST00000378391.6,ENST00000514189.5	1p36.32	.	.	.	.	.	.	.	.	.	.	.	.	.	.	.	.	.	.	.	.	.	.	.	.	.	.	.	.	.	.	.	.	.	.	.
chr1	3250281	.	T	G	.	PASS	PRDM16	intronic	NM_022114,NM_199454	.	.	.	ENST00000514189.5,ENST00000511072.5,ENST00000378391.6,ENST00000270722.9	1p36.32	.	.	.	.	.	.	.	.	.	.	.	.	.	.	.	.	.	.	.	.	.	.	.	.	.	.	.	.	.	.	.	.	.	.	.
chr1	3555607	.	A	C	.	PASS	MEGF6	intronic	NM_001409	.	.	.	ENST00000356575.8	1p36.32	.	.	.	.	.	.	.	.	.	.	.	.	.	.	.	.	.	.	.	.	.	.	.	.	.	.	.	.	.	.	.	.	.	.	.
chr1	4774721	.	T	G	.	PASS	AJAP1	intronic	NM_001042478,NM_018836	.	.	.	ENST00000378191.4,ENST00000378190.7	1p36.32	.	.	.	.	.	.	.	.	.	.	.	.	.	.	.	.	.	.	.	.	.	.	.	.	.	.	.	.	.	.	.	.	.	.	.
chr1	5004694	.	C	A	.	PASS	.	intergenic	NM_018836,NR_039612	dist=220903;dist=559377	.	.	.	1p36.32	.	.	Score=2259;Name="7308:THE1B(LTR)"	.	.	.	.	.	.	.	.	.	.	.	.	.	.	.	.	.	.	.	.	.	.	.	.	.	.	.	.	.	.	.	.
chr1	5004752	rs530567144	A	G	.	PASS	.	intergenic	NM_018836,NR_039612	dist=220961;dist=559319	.	.	.	1p36.32	.	.	Score=993;Name="7309:L2a(LINE)"	rs530567144	.	.	.	.	.	.	.	0.004	.	.	.	.	0.000798722	.	.	.	.	.	.	.	.	.	.	.	.	.	.	.	.	.	.
chr1	5081716	.	C	T	.	PASS	.	intergenic	NM_018836,NR_039612	dist=297925;dist=482355	.	.	.	1p36.32	.	.	.	.	.	.	.	.	.	.	.	.	.	.	.	.	.	.	.	.	.	.	.	.	.	.	.	.	.	.	.	.	.	.	.
chr1	5370759	.	G	A	.	PASS	.	intergenic	NM_018836,NR_039612	dist=586968;dist=193312	.	.	.	1p36.31	.	.	Score=2199;Name="8010:MLT2B3(LTR)"	.	.	.	.	.	.	.	.	.	.	.	.	.	.	.	.	.	.	.	.	.	.	.	.	.	.	.	.	.	.	.	.
chr1	5608592	.	G	C	.	PASS	.	intergenic	NR_039612,NR_039838	dist=44449;dist=254080	.	.	ENST00000413887.1	1p36.31	.	.	Score=4218;Name="8412:L1ME2(LINE)"	.	.	.	.	.	.	.	.	.	.	.	.	.	.	.	.	.	.	.	.	.	.	.	.	.	.	.	.	.	.	.	.
chr1	8875278	.	C	A	.	PASS	ENO1	intronic	NM_001428	.	.	.	ENST00000234590.8	1p36.23	.	.	.	.	.	.	.	.	.	.	.	.	.	.	.	.	.	.	.	.	.	.	.	.	.	.	.	.	.	.	.	.	.	.	.
chr1	9022670	.	A	C	.	PASS	SLC2A7	intronic	NM_207420	.	.	.	ENST00000400906.1	1p36.23	.	.	Score=292;Name="15296:MIRb(SINE)"	.	.	.	.	.	.	.	.	.	.	.	.	.	.	.	.	.	.	.	.	.	.	.	.	.	.	.	.	.	.	.	.
chr1	9264051	.	T	G	.	PASS	H6PD	exonic	NM_001282587,NM_004285	.	missense SNV	H6PD:NM_001282587:exon5:c.T1591G:p.L531V,H6PD:NM_004285:exon5:c.T1558G:p.L520V	ENST00000377403.6,ENST00000602477.1	1p36.22	.	.	.	.	.	.	.	.	.	.	.	.	.	.	.	.	.	.	.	.	.	.	.	.	.	.	.	.	.	.	.	.	.	.	.
chr1	9583231	.	T	A	.	PASS	.	downstream	NM_032315	.	.	.	ENST00000302692.6	1p36.22	.	.	.	.	.	.	.	.	.	.	.	.	.	.	.	.	.	.	.	.	.	.	.	.	.	.	.	.	.	.	.	.	.	.	.
chr1	9738843	.	T	G	.	PASS	CLSTN1	intronic	NM_001009566,NM_001302883,NM_014944	.	.	.	ENST00000361311.4,ENST00000377298.8	1p36.22	.	.	Score=2214;Name="17055:AluSz(SINE)"	.	.	.	.	.	.	.	.	.	.	.	.	.	.	.	.	.	.	.	.	.	.	.	.	.	.	.	.	.	.	.	.
chr1	10027419	rs569766498	A	G	.	PASS	.	intergenic	NM_052960,NM_006048	dist=11399;dist=5564	.	.	.	1p36.22	.	.	Score=765;Name="17843:L1MB7(LINE)"	rs569766498	.	.	.	.	.	.	.	.	0.001	.	.	.	0.000199681	.	.	.	.	.	.	.	.	.	.	.	.	.	.	.	.	.	.
chr1	10658014	.	A	T	.	PASS	CASZ1	intronic	NM_001079843,NM_017766	.	.	.	ENST00000344008.5,ENST00000377022.7	1p36.22	.	.	Score=961;Name="19332:FLAM_C(SINE)"	.	.	.	.	.	.	.	.	.	.	.	.	.	.	.	.	.	.	.	.	.	.	.	.	.	.	.	.	.	.	.	.
chr1	10922500	.	A	G	.	PASS	.	intergenic	NM_001079843,NM_001170754	dist=125824;dist=23973	.	.	.	1p36.22	.	.	Score=1588;Name="19818:L1MD(LINE)"	.	.	.	.	.	.	.	.	.	.	.	.	.	.	.	.	.	.	.	.	.	.	.	.	.	.	.	.	.	.	.	.
chr1	11980181	.	A	C	.	PASS	MFN2	UTR5	NM_001127660,NM_014874	NM_001127660:c.-8988A>C;NM_014874:c.-8988A>C	.	.	ENST00000444836.5	1p36.22	.	.	.	.	.	.	.	.	.	.	.	.	.	.	.	.	.	.	.	.	.	.	.	.	.	.	.	.	.	.	.	.	.	.	.
chr1	12135223	.	T	G	.	PASS	TNFRSF8	intronic	NM_001243,NM_001281430	.	.	.	ENST00000417814.3,ENST00000413146.6,ENST00000263932.6	1p36.22	.	.	Score=2270;Name="22875:AluSx3(SINE)"	.	.	.	.	.	.	.	.	.	.	.	.	.	.	.	.	.	.	.	.	.	.	.	.	.	.	.	.	.	.	.	.
chr1	12153397	.	G	T	.	PASS	.	intergenic	NM_001281430,NR_107000	dist=9190;dist=13546	.	.	.	1p36.22	.	.	.	.	.	.	.	.	.	.	.	.	.	.	.	.	.	.	.	.	.	.	.	.	.	.	.	.	.	.	.	.	.	.	.
chr1	12801720	rs56735913	C	T	.	PASS	.	intergenic	NM_023013,NR_146629	dist=5092;dist=20966	.	.	.	1p36.21	.	.	Score=27;Name="24278:(TCCCC)n(Simple_repeat)"	rs56735913	.	.	.	.	.	.	.	.	.	.	.	.	.	.	.	.	.	.	.	.	.	.	.	.	.	.	.	.	.	.	.
chr1	12881716	rs1736781	C	A	.	PASS	PRAMEF4	intronic	NM_001009611	.	.	.	ENST00000617044.1,ENST00000235349.5	1p36.21	.	Score=0.990208;Name=chr1:13247407	.	rs1736781	.	.	.	.	.	.	.	0.0992	0.0521	0.0875	0.1112	0.0692	0.0866613	.	.	.	.	.	.	.	.	.	.	.	.	.	.	.	.	.	.
chr1	12902127	rs2797705	C	T	.	PASS	.	intergenic	NM_001039361,NM_001012277	dist=3857;dist=14520	.	.	ENST00000617044.1	1p36.21	.	Score=0.990208;Name=chr1:13247407	Score=1966;Name="24448:AluSx4(SINE)"	rs2797705	.	.	.	.	.	.	.	.	.	.	.	.	.	.	.	.	.	.	.	.	.	.	.	.	.	.	.	.	.	.	.
chr1	12910980	rs879328698	G	A	.	PASS	.	intergenic	NM_001039361,NM_001012277	dist=12710;dist=5667	.	.	ENST00000617044.1	1p36.21	.	Score=0.990208;Name=chr1:13247407	.	rs879328698	.	.	.	.	.	.	.	.	.	.	.	.	.	.	.	.	.	.	.	.	.	.	.	.	.	.	.	.	.	.	.
chr1	13234159	rs77654535	A	G	.	PASS	.	intergenic	NM_001099850,NM_001013407	dist=8005;dist=20039	.	.	.	1p36.21	.	Score=0.97426;Name=chr1:13315267	.	rs77654535	.	.	.	.	.	.	.	.	.	.	.	.	.	.	.	.	.	.	.	.	.	.	.	.	.	.	.	.	.	.	.
chr1	13299425	.	C	T	.	PASS	.	intergenic	NM_001012276,NM_001291381	dist=14288;dist=4114	.	.	.	1p36.21	.	Score=0.990208;Name=chr1:12855323	Score=10281;Name="25084:SVA_D(Retroposon)"	.	.	.	.	.	.	.	.	.	.	.	.	.	.	.	.	.	.	.	.	.	.	.	.	.	.	.	.	.	.	.	.
chr1	13315626	.	G	A	.	PASS	PRAMEF15	UTR5	NM_001098376	NM_001098376:c.-2782G>A	.	.	ENST00000376152.2,ENST00000613530.4	1p36.21	.	Score=0.990208;Name=chr1:12855323	.	.	.	.	.	.	.	.	.	.	.	.	.	.	.	.	.	.	.	.	.	.	.	.	.	.	.	.	.	.	.	.	.
chr1	13542348	.	C	G	.	PASS	.	intergenic	NM_001010847,NM_006474	dist=28601;dist=41409	.	.	.	1p36.21	.	.	Score=363;Name="25684:MER45A(DNA)"	.	.	.	.	.	.	.	.	.	.	.	.	.	.	.	.	.	.	.	.	.	.	.	.	.	.	.	.	.	.	.	.
chr1	14237031	.	G	A	.	PASS	.	intergenic	NM_001135610,NM_015209	dist=411952;dist=361686	.	.	.	1p36.21	.	.	.	.	.	.	.	.	.	.	.	.	.	.	.	.	.	.	.	.	.	.	.	.	.	.	.	.	.	.	.	.	.	.	.
chr1	14838732	.	A	C	.	PASS	KAZN	intronic	NM_015209,NM_201628	.	.	.	ENST00000503743.5,ENST00000376030.6	1p36.21	.	.	Score=1979;Name="28461:AluSz(SINE)"	.	.	.	.	.	.	.	.	.	.	.	.	.	.	.	.	.	.	.	.	.	.	.	.	.	.	.	.	.	.	.	.
chr1	14913007	.	T	G	.	PASS	KAZN	intronic	NM_015209,NM_201628	.	.	.	ENST00000503743.5,ENST00000376030.6	1p36.21	.	.	.	.	.	.	.	.	.	.	.	.	.	.	.	.	.	.	.	.	.	.	.	.	.	.	.	.	.	.	.	.	.	.	.
chr1	15437820	.	C	A	.	PASS	.	upstream	NM_007272	.	.	.	.	1p36.21	.	.	Score=1675;Name="29933:AluSx(SINE)"	.	.	.	.	.	.	.	.	.	.	.	.	.	.	.	.	.	.	.	.	.	.	.	.	.	.	.	.	.	.	.	.
chr1	15790503	rs868552427	A	C	.	PASS	.	intergenic	NM_001350151,NM_001089591	dist=3909;dist=16659	.	.	.	1p36.21	.	.	Score=2186;Name="30859:AluSz(SINE)"	rs868552427	.	.	.	.	.	.	.	.	.	.	.	.	.	.	.	.	.	.	.	.	.	.	.	.	.	.	.	.	.	.	.
chr1	16538556	rs199857564	G	A	.	PASS	.	upstream	NM_001310155	.	.	.	.	1p36.13	.	Score=0.974351;Name=chr1:16849163	.	rs199857564	.	.	.	.	.	.	.	.	.	.	.	.	.	.	.	.	.	.	.	.	.	.	.	.	.	.	.	.	.	.	.
chr1	16577665	rs61772346	C	G	.	PASS	NBPF1	intronic	NM_017940	.	.	.	ENST00000430580.6,ENST00000432949.5	1p36.13	.	Score=0.984241;Name=chr1:16583866	.	rs61772346	.	.	.	.	.	.	.	.	.	.	.	.	.	.	.	.	.	.	.	.	.	.	.	.	.	.	.	.	.	.	.
chr1	16681169	rs189136990	T	C	.	PASS	.	upstream	NR_037446	.	.	.	.	1p36.13	.	Score=0.993135;Name=chr1_KI270714v1_random:9895	.	rs189136990	.	.	.	.	.	.	.	.	.	.	.	.	.	.	.	.	.	.	.	.	.	.	.	.	.	.	.	.	.	.	.
chr1	16732617	.	T	A	.	PASS	.	intergenic	NR_026567,NM_001310138	dist=12460;dist=1190	.	.	.	1p36.13	.	Score=0.990257;Name=chr1_KI270713v1_random:0	Score=4760;Name="33109:MER49(LTR)"	.	.	.	.	.	.	.	.	.	.	.	.	.	.	.	.	.	.	.	.	.	.	.	.	.	.	.	.	.	.	.	.
chr1	16765520	rs367704809	T	G	.	PASS	.	intergenic	NM_001271733,NR_037446	dist=1040;dist=93429	.	.	.	1p36.13	.	Score=0.992611;Name=chr1:234783386	.	rs367704809	.	.	.	.	.	.	.	.	.	.	.	.	.	.	.	.	.	.	.	.	.	.	.	.	.	.	.	.	.	.	.
chr1	17277443	.	C	T	.	PASS	PADI3	intronic	NM_016233	.	.	.	ENST00000375460.3	1p36.13	.	.	Score=2497;Name="34310:AluSp(SINE)"	.	.	.	.	.	.	.	.	.	.	.	.	.	.	.	.	.	.	.	.	.	.	.	.	.	.	.	.	.	.	.	.
chr1	17657315	.	A	G	.	PASS	ARHGEF10L	intronic	NM_001011722,NM_001319837,NM_001319838,NM_001328124,NM_018125	.	.	.	ENST00000375408.7,ENST00000361221.7,ENST00000375415.5	1p36.13	.	.	.	.	.	.	.	.	.	.	.	.	.	.	.	.	.	.	.	.	.	.	.	.	.	.	.	.	.	.	.	.	.	.	.
chr1	17914032	.	T	C	.	PASS	.	intergenic	NM_030812,NR_125946	dist=86969;dist=151625	.	.	.	1p36.13	.	.	.	.	.	.	.	.	.	.	.	.	.	.	.	.	.	.	.	.	.	.	.	.	.	.	.	.	.	.	.	.	.	.	.
chr1	17976626	.	C	A	.	PASS	.	intergenic	NM_030812,NR_125946	dist=149563;dist=89031	.	.	.	1p36.13	.	.	.	.	.	.	.	.	.	.	.	.	.	.	.	.	.	.	.	.	.	.	.	.	.	.	.	.	.	.	.	.	.	.	.
chr1	17976627	rs754903366	C	T	.	PASS	.	intergenic	NM_030812,NR_125946	dist=149564;dist=89030	.	.	.	1p36.13	.	.	.	rs754903366	.	.	.	.	.	.	.	.	.	.	.	.	.	.	.	.	.	.	.	.	.	.	.	.	.	.	.	.	.	.	.
chr1	18124825	.	C	T	.	PASS	IGSF21	intronic	NM_032880	.	.	.	ENST00000251296.3	1p36.13	.	.	.	.	.	.	.	.	.	.	.	.	.	.	.	.	.	.	.	.	.	.	.	.	.	.	.	.	.	.	.	.	.	.	.
chr1	18604925	.	C	T	.	PASS	.	intergenic	NM_152375,NM_013945	dist=118939;dist=26081	.	.	.	1p36.13	.	.	.	.	.	.	.	.	.	.	.	.	.	.	.	.	.	.	.	.	.	.	.	.	.	.	.	.	.	.	.	.	.	.	.
chr1	20384839	.	A	C	.	PASS	LINC01141	ncRNA_intronic	NR_033887	.	.	.	ENST00000426428.5	1p36.12	.	.	Score=571;Name="41992:L2c(LINE)"	.	.	.	.	.	.	.	.	.	.	.	.	.	.	.	.	.	.	.	.	.	.	.	.	.	.	.	.	.	.	.	.
chr1	21221280	.	A	C	.	PASS	ECE1	intronic	NM_001113347,NM_001113348,NM_001113349,NM_001397	.	.	.	ENST00000264205.10,ENST00000415912.6,ENST00000357071.8,ENST00000436918.6,ENST00000374893.10	1p36.12	.	.	Score=1920;Name="44050:AluSx1(SINE)"	.	.	.	.	.	.	.	.	.	.	.	.	.	.	.	.	.	.	.	.	.	.	.	.	.	.	.	.	.	.	.	.
chr1	21877816	.	G	A	.	PASS	HSPG2	intronic	NM_001291860,NM_005529	.	.	.	ENST00000374695.7	1p36.12	.	.	Score=314;Name="45755:MIRb(SINE)"	.	.	.	.	.	.	.	.	.	.	.	.	.	.	.	.	.	.	.	.	.	.	.	.	.	.	.	.	.	.	.	.
chr1	22564196	.	A	C	.	PASS	EPHA8	intronic	NM_001006943,NM_020526	.	.	.	ENST00000166244.7,ENST00000374644.8,ENST00000538803.1	1p36.12	.	.	.	.	.	.	.	.	.	.	.	.	.	.	.	.	.	.	.	.	.	.	.	.	.	.	.	.	.	.	.	.	.	.	.
chr1	22627342	.	G	A	.	PASS	.	intergenic	NM_020526,NR_106742	dist=23748;dist=5916	.	.	.	1p36.12	.	.	.	.	.	.	.	.	.	.	.	.	.	.	.	.	.	.	.	.	.	.	.	.	.	.	.	.	.	.	.	.	.	.	.
chr1	22689171	.	G	A	.	PASS	.	intergenic	NM_000491,NM_001309193	dist=27535;dist=21667	.	.	.	1p36.12	.	.	Score=2420;Name="47820:AluY(SINE)"	.	.	.	.	.	.	.	.	.	.	.	.	.	.	.	.	.	.	.	.	.	.	.	.	.	.	.	.	.	.	.	.
chr1	22693296	.	T	G	.	PASS	.	intergenic	NM_000491,NM_001309193	dist=31660;dist=17542	.	.	.	1p36.12	.	.	Score=1368;Name="47839:AluSx(SINE)"	.	.	.	.	.	.	.	.	.	.	.	.	.	.	.	.	.	.	.	.	.	.	.	.	.	.	.	.	.	.	.	.
chr1	22988872	.	G	T	.	PASS	.	intergenic	NM_001289974,NM_001242521	dist=23442;dist=21962	.	.	.	1p36.12	.	.	Score=1562;Name="48645:MER4-int(LTR)"	.	.	.	.	.	.	.	.	.	.	.	.	.	.	.	.	.	.	.	.	.	.	.	.	.	.	.	.	.	.	.	.
chr1	23760138	.	A	C	.	PASS	TCEB3	UTR3	NM_003198	NM_003198:c.*565A>C	.	.	ENST00000613537.4,ENST00000418390.6	1p36.11	.	.	.	.	.	.	.	.	.	.	.	.	.	.	.	.	.	.	.	.	.	.	.	.	.	.	.	.	.	.	.	.	.	.	.
chr1	26250939	.	T	C	.	PASS	CEP85	intronic	NM_001281517,NM_001319944,NM_022778	.	.	.	ENST00000252992.8,ENST00000451429.6	1p36.11	.	.	Score=2109;Name="57448:AluSx1(SINE)"	.	.	.	.	.	.	.	.	.	.	.	.	.	.	.	.	.	.	.	.	.	.	.	.	.	.	.	.	.	.	.	.
chr1	26250942	.	T	C	.	PASS	CEP85	intronic	NM_001281517,NM_001319944,NM_022778	.	.	.	ENST00000252992.8,ENST00000451429.6	1p36.11	.	.	Score=2109;Name="57448:AluSx1(SINE)"	.	.	.	.	.	.	.	.	.	.	.	.	.	.	.	.	.	.	.	.	.	.	.	.	.	.	.	.	.	.	.	.
chr1	26662697	.	G	T	.	PASS	.	intergenic	NM_002953,NR_135804	dist=87668;dist=29213	.	.	.	1p36.11	.	.	Score=1299;Name="58648:L1ME4b(LINE)"	.	.	.	.	.	.	.	.	.	.	.	.	.	.	.	.	.	.	.	.	.	.	.	.	.	.	.	.	.	.	.	.
chr1	27258542	rs72653277	G	A	.	PASS	WDTC1	intronic	NM_001276252,NM_015023	.	.	.	ENST00000319394.7,ENST00000361771.7	1p36.11	.	.	Score=2327;Name="60407:AluSx1(SINE)"	rs72653277	.	.	.	.	.	.	.	.	.	.	.	.	.	.	.	.	.	.	.	.	.	.	.	.	.	.	.	.	.	.	.
chr1	27948644	.	T	G	.	PASS	SMPDL3B	intronic	NM_001009568,NM_001304579,NM_014474	.	.	.	ENST00000448015.1,ENST00000549094.1,ENST00000373894.7,ENST00000373888.8	1p35.3	.	.	.	.	.	.	.	.	.	.	.	.	.	.	.	.	.	.	.	.	.	.	.	.	.	.	.	.	.	.	.	.	.	.	.
chr1	28768208	.	A	G	.	PASS	YTHDF2	intronic	NM_001172828,NM_001173128,NM_016258	.	.	.	ENST00000542507.5,ENST00000373812.7,ENST00000541996.5,ENST00000621244.1	1p35.3	.	.	Score=2339;Name="64800:AluSx3(SINE)"	.	.	.	.	.	.	.	.	.	.	.	.	.	.	.	.	.	.	.	.	.	.	.	.	.	.	.	.	.	.	.	.
chr1	28828821	.	C	G	.	PASS	OPRD1	intronic	NM_000911	.	.	.	ENST00000621425.1,ENST00000234961.6	1p35.3	.	.	Score=2293;Name="64992:AluSx(SINE)"	.	.	.	.	.	.	.	.	.	.	.	.	.	.	.	.	.	.	.	.	.	.	.	.	.	.	.	.	.	.	.	.
chr1	31237610	.	A	C	.	PASS	NKAIN1	intronic	NM_024522	.	.	.	ENST00000373736.6	1p35.2	.	.	Score=2112;Name="70761:AluSx(SINE)"	.	.	.	.	.	.	.	.	.	.	.	.	.	.	.	.	.	.	.	.	.	.	.	.	.	.	.	.	.	.	.	.
chr1	32785899	.	T	C	.	PASS	YARS	intronic	NM_003680	.	.	.	ENST00000373477.8,ENST00000616261.1	1p35.1	.	.	Score=16;Name="74996:(T)n(Simple_repeat)"	.	.	.	.	.	.	.	.	.	.	.	.	.	.	.	.	.	.	.	.	.	.	.	.	.	.	.	.	.	.	.	.
chr1	33726479	.	T	G	.	PASS	CSMD2	intronic	NM_001281956,NM_052896	.	.	.	ENST00000373388.6,ENST00000373381.8,ENST00000619121.4	1p35.1	.	.	.	.	.	.	.	.	.	.	.	.	.	.	.	.	.	.	.	.	.	.	.	.	.	.	.	.	.	.	.	.	.	.	.
chr1	33954730	.	T	A	.	PASS	CSMD2	intronic	NM_001281956,NM_052896	.	.	.	ENST00000619121.4,ENST00000373381.8,ENST00000373388.6	1p35.1	.	.	Score=2713;Name="77626:L1MB3(LINE)"	.	.	.	.	.	.	.	.	.	.	.	.	.	.	.	.	.	.	.	.	.	.	.	.	.	.	.	.	.	.	.	.
chr1	34080019	.	C	A	.	PASS	CSMD2	intronic	NM_001281956,NM_052896	.	.	.	ENST00000373388.6,ENST00000373381.8,ENST00000619121.4	1p35.1	.	.	Score=302;Name="77918:L1MEj(LINE)"	.	.	.	.	.	.	.	.	.	.	.	.	.	.	.	.	.	.	.	.	.	.	.	.	.	.	.	.	.	.	.	.
chr1	34440991	.	G	A	.	PASS	.	intergenic	NM_032884,NR_030278	dist=221861;dist=228608	.	.	.	1p34.3	.	.	.	.	.	.	.	.	.	.	.	.	.	.	.	.	.	.	.	.	.	.	.	.	.	.	.	.	.	.	.	.	.	.	.
chr1	34890775	.	T	G	.	PASS	DLGAP3	intronic	NM_001080418	.	.	.	ENST00000235180.4,ENST00000373347.5	1p34.3	.	.	Score=2766;Name="79688:MLT1F2(LTR)"	.	.	.	.	.	.	.	.	.	.	.	.	.	.	.	.	.	.	.	.	.	.	.	.	.	.	.	.	.	.	.	.
chr1	36720052	.	G	T	.	PASS	.	intergenic	NM_156039,NM_000831	dist=236738;dist=75475	.	.	.	1p34.3	.	.	Score=2138;Name="84328:L1ME1(LINE)"	.	.	.	.	.	.	.	.	.	.	.	.	.	.	.	.	.	.	.	.	.	.	.	.	.	.	.	.	.	.	.	.
chr1	37008173	.	A	C	.	PASS	GRIK3	intronic	NM_000831	.	.	.	ENST00000373091.7,ENST00000373093.4	1p34.3	.	.	Score=604;Name="84893:MIRb(SINE)"	.	.	.	.	.	.	.	.	.	.	.	.	.	.	.	.	.	.	.	.	.	.	.	.	.	.	.	.	.	.	.	.
chr1	37315142	.	A	C	.	PASS	.	intergenic	NR_036217,NR_038842	dist=153508;dist=139737	.	.	ENST00000413901.1	1p34.3	.	.	.	.	.	.	.	.	.	.	.	.	.	.	.	.	.	.	.	.	.	.	.	.	.	.	.	.	.	.	.	.	.	.	.
chr1	37880859	.	G	C	.	PASS	INPP5B	intronic	NM_001297434,NM_001350227,NM_001350228,NM_005540	.	.	.	ENST00000373027.5,ENST00000373024.7,ENST00000458109.6,ENST00000373023.6,ENST00000373026.5	1p34.3	.	.	Score=1653;Name="86902:AluJr(SINE)"	.	.	.	.	.	.	.	.	.	.	.	.	.	.	.	.	.	.	.	.	.	.	.	.	.	.	.	.	.	.	.	.
chr1	38980421	.	G	T	.	PASS	.	intergenic	NM_017821,NM_024595	dist=38591;dist=10823	.	.	.	1p34.3	.	.	Score=2262;Name="89458:AluSx(SINE)"	.	.	.	.	.	.	.	.	.	.	.	.	.	.	.	.	.	.	.	.	.	.	.	.	.	.	.	.	.	.	.	.
chr1	40100071	.	G	C	.	PASS	.	intergenic	NM_001142604,NM_012421	dist=2601;dist=61298	.	.	.	1p34.2	.	.	Score=2698;Name="92286:L1PA15(LINE)"	.	.	.	.	.	.	.	.	.	.	.	.	.	.	.	.	.	.	.	.	.	.	.	.	.	.	.	.	.	.	.	.
chr1	40328677	.	T	G	.	PASS	.	intergenic	NM_001852,NM_022733	dist=11410;dist=45029	.	.	.	1p34.2	.	.	Score=2203;Name="92901:AluSx(SINE)"	.	.	.	.	.	.	.	.	.	.	.	.	.	.	.	.	.	.	.	.	.	.	.	.	.	.	.	.	.	.	.	.
chr1	40827580	.	A	C	.	PASS	KCNQ4	intronic	NM_004700,NM_172163	.	.	.	ENST00000509682.6,ENST00000347132.9	1p34.2	.	.	.	.	.	.	.	.	.	.	.	.	.	.	.	.	.	.	.	.	.	.	.	.	.	.	.	.	.	.	.	.	.	.	.
chr1	41607861	.	G	C	.	PASS	HIVEP3	intronic	NM_001127714,NM_024503	.	.	.	ENST00000372583.5,ENST00000372584.5,ENST00000247584.6	1p34.2	.	.	Score=372;Name="95929:MLT1J(LTR)"	.	.	.	.	.	.	.	.	.	.	.	.	.	.	.	.	.	.	.	.	.	.	.	.	.	.	.	.	.	.	.	.
chr1	42320447	.	C	A	.	PASS	FOXJ3	intronic	NM_001198850,NM_001198851,NM_001198852,NM_014947	.	.	.	ENST00000361346.5,ENST00000372573.5,ENST00000372572.5,ENST00000361776.5	1p34.2	.	.	.	.	.	.	.	.	.	.	.	.	.	.	.	.	.	.	.	.	.	.	.	.	.	.	.	.	.	.	.	.	.	.	.
chr1	42373925	rs1018147879	C	T	.	PASS	.	intergenic	NM_001198850,NM_173642	dist=38048;dist=6872	.	.	.	1p34.2	.	.	Score=2321;Name="97530:AluSx1(SINE)"	rs1018147879	.	.	.	.	.	.	.	.	.	.	.	.	.	.	.	.	.	.	.	.	.	.	.	.	.	.	.	.	.	.	.
chr1	42828498	.	A	T	.	PASS	ERMAP	intronic	NM_001017922,NM_018538	.	.	.	ENST00000372517.6,ENST00000372514.7	1p34.2	.	.	Score=2073;Name="98599:AluJb(SINE)"	.	.	.	.	.	.	.	.	.	.	.	.	.	.	.	.	.	.	.	.	.	.	.	.	.	.	.	.	.	.	.	.
chr1	43904985	.	A	C	.	PASS	ST3GAL3	intronic	NM_001270459,NM_001270460,NM_001270461,NM_001270462,NM_001270463,NM_001270464,NM_001270465,NM_001270466,NM_001350619,NM_001350620,NM_001350621,NM_006279,NM_174963,NM_174964,NM_174965,NM_174966,NM_174967,NM_174968,NM_174969,NM_174970,NM_174971	.	.	.	ENST00000372372.6,ENST00000332628.10,ENST00000361392.8,ENST00000545417.5,ENST00000361812.8,ENST00000372362.6,ENST00000372368.6,ENST00000533933.5,ENST00000330208.6,ENST00000372367.5,ENST00000262915.7,ENST00000351035.7,ENST00000528371.5,ENST00000372366.5,ENST00000372365.5,ENST00000335430.10,ENST00000531451.5,ENST00000347631.6,ENST00000353126.7,ENST00000372369.5,ENST00000361400.8,ENST00000531816.1,E…	1p34.1	.	.	.	.	.	.	.	.	.	.	.	.	.	.	.	.	.	.	.	.	.	.	.	.	.	.	.	.	.	.	.	.	.	.	.
chr1	44520130	rs111671325	A	T	.	PASS	RNF220	intronic	NM_001319956,NM_001319957,NM_018150	.	.	.	ENST00000361799.6,ENST00000372247.6,ENST00000355387.6	1p34.1	.	.	Score=200;Name="102333:L3b(LINE)"	rs111671325	.	.	.	.	.	.	.	.	.	.	.	.	.	.	.	.	.	.	.	.	.	.	.	.	.	.	.	.	.	.	.
chr1	44887903	rs558358727	A	C	.	PASS	EIF2B3	intronic	NM_001166588,NM_001261418,NM_020365	.	.	.	ENST00000372183.7,ENST00000360403.6,ENST00000620860.4	1p34.1	.	.	Score=1627;Name="103198:AluSg(SINE)"	rs558358727	.	.	.	.	.	.	.	.	0.002	0.001	0.028	.	0.00798722	.	.	.	.	.	.	.	.	.	.	.	.	.	.	.	.	.	.
chr1	45178341	.	T	G	.	PASS	ZSWIM5	intronic	NM_020883	.	.	.	ENST00000359600.5	1p34.1	.	.	Score=1882;Name="103915:AluSx(SINE)"	.	.	.	.	.	.	.	.	.	.	.	.	.	.	.	.	.	.	.	.	.	.	.	.	.	.	.	.	.	.	.	.
chr1	45186806	.	G	C	.	PASS	ZSWIM5	intronic	NM_020883	.	.	.	ENST00000359600.5	1p34.1	.	.	Score=1859;Name="103924:AluSz6(SINE)"	.	.	.	.	.	.	.	.	.	.	.	.	.	.	.	.	.	.	.	.	.	.	.	.	.	.	.	.	.	.	.	.
chr1	45803929	.	C	T	.	PASS	MAST2	exonic	NM_001319245,NM_001324320,NM_015112	.	missense SNV	MAST2:NM_001319245:exon1:c.C34T:p.P12S,MAST2:NM_001324320:exon1:c.C34T:p.P12S,MAST2:NM_015112:exon1:c.C34T:p.P12S	ENST00000361297.6	1p34.1	.	.	Score=18;Name="105578:(GCC)n(Simple_repeat)"	.	.	.	.	.	.	.	.	.	.	.	.	.	.	.	.	.	.	.	.	.	.	.	.	.	.	.	.	.	.	.	.
chr1	46242066	rs866476719	C	T	.	PASS	.	intergenic	NM_001013615,NM_001142548	dist=20810;dist=5629	.	.	.	1p34.1	.	Score=0.990223;Name=chr9:120494812	Score=6343;Name="106641:SVA_F(Retroposon)"	rs866476719	.	.	.	.	.	.	.	.	.	.	.	.	.	.	.	.	.	.	.	.	.	.	.	.	.	.	.	.	.	.	.
chr1	47330304	.	G	T	.	PASS	.	intergenic	NM_001282936,NM_016308	dist=16157;dist=3493	.	.	.	1p33	.	.	.	.	.	.	.	.	.	.	.	.	.	.	.	.	.	.	.	.	.	.	.	.	.	.	.	.	.	.	.	.	.	.	.
chr1	47513289	.	C	G	.	PASS	.	intergenic	NM_004474,NM_001194986	dist=72598;dist=247239	.	.	.	1p33	.	.	.	.	.	.	.	.	.	.	.	.	.	.	.	.	.	.	.	.	.	.	.	.	.	.	.	.	.	.	.	.	.	.	.
chr1	47578116	.	A	T	.	PASS	.	intergenic	NM_004474,NM_001194986	dist=137425;dist=182412	.	.	.	1p33	.	.	Score=199;Name="109392:AmnSINE1(SINE)"	.	.	.	.	.	.	.	.	.	.	.	.	.	.	.	.	.	.	.	.	.	.	.	.	.	.	.	.	.	.	.	.
chr1	48248932	.	A	C	.	PASS	.	downstream	NM_001011547,NM_001135181	.	.	.	.	1p33	.	.	.	.	.	.	.	.	.	.	.	.	.	.	.	.	.	.	.	.	.	.	.	.	.	.	.	.	.	.	.	.	.	.	.
chr1	49123954	.	G	T	.	PASS	AGBL4	intronic	NM_001323573,NM_001323574,NM_001323575,NM_032785	.	.	.	ENST00000371836.1,ENST00000371838.5,ENST00000456002.1,ENST00000371839.5	1p33	.	.	.	.	.	.	.	.	.	.	.	.	.	.	.	.	.	.	.	.	.	.	.	.	.	.	.	.	.	.	.	.	.	.	.
chr1	49788142	.	T	A	.	PASS	AGBL4	intronic	NM_001323573,NM_001323574,NM_001323575,NM_032785	.	.	.	ENST00000371839.5,ENST00000371838.5,ENST00000371836.1	1p33	.	.	Score=295;Name="113852:MER77(LTR)"	.	.	.	.	.	.	.	.	.	.	.	.	.	.	.	.	.	.	.	.	.	.	.	.	.	.	.	.	.	.	.	.
chr1	49830355	.	C	G	.	PASS	AGBL4	intronic	NM_001323573,NM_001323574,NM_001323575,NM_032785	.	.	.	ENST00000371836.1,ENST00000371838.5,ENST00000371839.5	1p33	.	.	Score=11441;Name="113946:L1PA7(LINE)"	.	.	.	.	.	.	.	.	.	.	.	.	.	.	.	.	.	.	.	.	.	.	.	.	.	.	.	.	.	.	.	.
chr1	49952834	.	A	T	.	PASS	AGBL4	intronic	NM_001323573,NM_001323574,NM_001323575,NM_032785	.	.	.	ENST00000371839.5,ENST00000371836.1,ENST00000371838.5	1p33	.	.	.	.	.	.	.	.	.	.	.	.	.	.	.	.	.	.	.	.	.	.	.	.	.	.	.	.	.	.	.	.	.	.	.
chr1	50028155	.	T	G	.	PASS	.	intergenic	NM_032785,NM_001324208	dist=4201;dist=19859	.	.	.	1p33	.	.	Score=2647;Name="114257:LTR53(LTR)"	.	.	.	.	.	.	.	.	.	.	.	.	.	.	.	.	.	.	.	.	.	.	.	.	.	.	.	.	.	.	.	.
chr1	50508812	.	T	G	.	PASS	FAF1	intronic	NM_007051	.	.	.	ENST00000396153.6,ENST00000371778.5	1p32.3	.	.	Score=2247;Name="115324:AluSx(SINE)"	.	.	.	.	.	.	.	.	.	.	.	.	.	.	.	.	.	.	.	.	.	.	.	.	.	.	.	.	.	.	.	.
chr1	50549803	.	A	C	.	PASS	FAF1	intronic	NM_007051	.	.	.	ENST00000371778.5,ENST00000396153.6	1p32.3	.	.	Score=1644;Name="115419:AluJo(SINE)"	.	.	.	.	.	.	.	.	.	.	.	.	.	.	.	.	.	.	.	.	.	.	.	.	.	.	.	.	.	.	.	.
chr1	50666736	.	A	T	.	PASS	FAF1	intronic	NM_007051	.	.	.	ENST00000396153.6,ENST00000371778.5	1p32.3	.	.	Score=2288;Name="115676:AluSx(SINE)"	.	.	.	.	.	.	.	.	.	.	.	.	.	.	.	.	.	.	.	.	.	.	.	.	.	.	.	.	.	.	.	.
chr1	51416011	.	C	G	.	PASS	EPS15	intronic	NM_001159969,NM_001981	.	.	.	ENST00000371733.7,ENST00000371730.6	1p32.3	.	.	.	.	.	.	.	.	.	.	.	.	.	.	.	.	.	.	.	.	.	.	.	.	.	.	.	.	.	.	.	.	.	.	.
chr1	52124474	.	T	G	.	PASS	.	intergenic	NM_152265,NM_004799	dist=33758;dist=17620	.	.	.	1p32.3	.	.	Score=2224;Name="119421:AluSq2(SINE)"	.	.	.	.	.	.	.	.	.	.	.	.	.	.	.	.	.	.	.	.	.	.	.	.	.	.	.	.	.	.	.	.
chr1	52132442	.	A	C	.	PASS	.	intergenic	NM_152265,NM_004799	dist=41726;dist=9652	.	.	.	1p32.3	.	.	Score=2521;Name="119444:AluSx(SINE)"	.	.	.	.	.	.	.	.	.	.	.	.	.	.	.	.	.	.	.	.	.	.	.	.	.	.	.	.	.	.	.	.
chr1	52228907	.	A	T	.	PASS	ZFYVE9	intronic	NM_004799,NM_007324	.	.	.	ENST00000287727.7,ENST00000357206.6,ENST00000371591.1	1p32.3	.	.	Score=1694;Name="119670:AluJr4(SINE)"	.	.	.	.	.	.	.	.	.	.	.	.	.	.	.	.	.	.	.	.	.	.	.	.	.	.	.	.	.	.	.	.
chr1	52444113	.	G	C	.	PASS	ZCCHC11	intronic	NM_001009881,NM_015269	.	.	.	ENST00000257177.8,ENST00000371544.7	1p32.3	.	.	Score=2292;Name="120191:AluSc(SINE)"	.	.	.	.	.	.	.	.	.	.	.	.	.	.	.	.	.	.	.	.	.	.	.	.	.	.	.	.	.	.	.	.
chr1	53427219	rs932112581	T	C	.	PASS	.	intergenic	NR_131923,NR_002314	dist=90710;dist=11151	.	.	.	1p32.3	.	.	Score=15840;Name="122813:HERVH-int(LTR)"	rs932112581	.	.	.	.	.	.	.	.	.	.	.	.	.	.	.	.	.	.	.	.	.	.	.	.	.	.	.	.	.	.	.
chr1	54387000	.	T	G	.	PASS	SSBP3	intronic	NM_001009955,NM_018070,NM_145716	.	.	.	ENST00000371320.7,ENST00000357475.8,ENST00000610401.4,ENST00000417664.6,ENST00000371319.7	1p32.3	.	.	.	.	.	.	.	.	.	.	.	.	.	.	.	.	.	.	.	.	.	.	.	.	.	.	.	.	.	.	.	.	.	.	.
chr1	55836053	rs941945829	T	C	.	PASS	.	intergenic	NR_146283,NR_147162	dist=601876;dist=79556	.	.	ENST00000424357.1	1p32.2	.	.	Score=32;Name="128405:(CTTCCACG)n(Simple_repeat)"	rs941945829	.	.	.	.	.	.	.	.	.	.	.	.	.	.	.	.	.	.	.	.	.	.	.	.	.	.	.	.	.	.	.
chr1	57447009	.	T	G	.	PASS	DAB1	intronic	NM_021080	.	.	.	.	1p32.2	.	.	Score=275;Name="131938:L2b(LINE)"	.	.	.	.	.	.	.	.	.	.	.	.	.	.	.	.	.	.	.	.	.	.	.	.	.	.	.	.	.	.	.	.
chr1	57551639	.	C	G	.	PASS	DAB1	intronic	NM_021080	.	.	.	.	1p32.2	.	.	.	.	.	.	.	.	.	.	.	.	.	.	.	.	.	.	.	.	.	.	.	.	.	.	.	.	.	.	.	.	.	.	.
chr1	58277212	.	G	C	.	PASS	.	intergenic	NM_021080,NM_145243	dist=26673;dist=203507	.	.	.	1p32.2	.	.	Score=2342;Name="133862:AluSx(SINE)"	.	.	.	.	.	.	.	.	.	.	.	.	.	.	.	.	.	.	.	.	.	.	.	.	.	.	.	.	.	.	.	.
chr1	58471211	.	C	T	.	PASS	.	intergenic	NM_021080,NM_145243	dist=220672;dist=9508	.	.	.	1p32.2	.	.	.	.	.	.	.	.	.	.	.	.	.	.	.	.	.	.	.	.	.	.	.	.	.	.	.	.	.	.	.	.	.	.	.
chr1	58784131	.	T	G	.	PASS	.	upstream	NM_002228	.	.	.	ENST00000371222.3	1p32.1	.	.	.	.	.	.	.	.	.	.	.	.	.	.	.	.	.	.	.	.	.	.	.	.	.	.	.	.	.	.	.	.	.	.	.
chr1	60183344	.	A	T	.	PASS	.	intergenic	NM_152377,NR_146508	dist=109574;dist=332372	.	.	.	1p32.1	.	.	.	.	.	.	.	.	.	.	.	.	.	.	.	.	.	.	.	.	.	.	.	.	.	.	.	.	.	.	.	.	.	.	.
chr1	61250653	.	G	C	.	PASS	NFIA-AS1	ncRNA_intronic	NR_104180	.	.	.	ENST00000407417.7,ENST00000485903.6,ENST00000442027.5,ENST00000630199.2,ENST00000371185.6,ENST00000371189.8,ENST00000403491.7,ENST00000371184.6,ENST00000371187.7,ENST00000371191.5	1p31.3	.	.	.	.	.	.	.	.	.	.	.	.	.	.	.	.	.	.	.	.	.	.	.	.	.	.	.	.	.	.	.	.	.	.	.
chr1	62098502	rs984860876	T	G	.	PASS	INADL	intronic	NM_001350145,NM_176877	.	.	.	ENST00000371158.6,ENST00000613764.4,ENST00000316485.10	1p31.3	.	.	Score=2174;Name="141899:AluSz6(SINE)"	rs984860876	.	.	.	.	.	.	.	.	.	.	.	.	.	.	.	.	.	.	.	.	.	.	.	.	.	.	.	.	.	.	.
chr1	62276109	.	C	T	.	PASS	KANK4	intronic	NM_001320269,NM_181712	.	.	.	ENST00000354381.3,ENST00000371153.8	1p31.3	.	.	Score=311;Name="142357:L3(LINE)"	.	.	.	.	.	.	.	.	.	.	.	.	.	.	.	.	.	.	.	.	.	.	.	.	.	.	.	.	.	.	.	.
chr1	62831166	.	C	T	.	PASS	ATG4C	intronic	NM_032852,NM_178221	.	.	.	ENST00000371120.7,ENST00000317868.8	1p31.3	.	.	.	.	.	.	.	.	.	.	.	.	.	.	.	.	.	.	.	.	.	.	.	.	.	.	.	.	.	.	.	.	.	.	.
chr1	63482764	.	T	G	.	PASS	ITGB3BP	intronic	NM_001206739,NM_001347145,NM_001347147,NM_001347148,NM_014288	.	.	.	ENST00000371092.7,ENST00000271002.14	1p31.3	.	.	Score=2355;Name="145043:AluSz6(SINE)"	.	.	.	.	.	.	.	.	.	.	.	.	.	.	.	.	.	.	.	.	.	.	.	.	.	.	.	.	.	.	.	.
chr1	64197892	rs4017242	C	T	.	PASS	.	intergenic	NM_005012,NM_152489	dist=16396;dist=5726	.	.	.	1p31.3	.	.	Score=43;Name="146583:(AC)n(Simple_repeat)"	rs4017242	.	.	.	.	.	.	.	.	.	.	.	.	.	.	.	.	.	.	.	.	.	.	.	.	.	.	.	.	.	.	.
chr1	64744015	rs369265525	G	T	.	PASS	.	intergenic	NM_020925,NM_018211	dist=50957;dist=1080	.	.	.	1p31.3	.	.	.	rs369265525	.	.	.	.	.	.	.	.	.	.	.	.	.	.	.	.	.	.	.	.	.	.	.	.	.	.	.	.	.	.	.
chr1	65399245	.	T	C	.	PASS	DNAJC6	intronic	NM_001256864,NM_001256865,NM_014787	.	.	.	ENST00000395325.7,ENST00000371069.4,ENST00000263441.11	1p31.3	.	.	Score=382;Name="149234:MIRb(SINE)"	.	.	.	.	.	.	.	.	.	.	.	.	.	.	.	.	.	.	.	.	.	.	.	.	.	.	.	.	.	.	.	.
chr1	65436140	.	A	T	.	PASS	LEPR	intronic	NM_001003679,NM_001003680,NM_002303	.	.	.	ENST00000349533.10,ENST00000371060.7,ENST00000371059.7,ENST00000406510.7	1p31.3	.	.	.	.	.	.	.	.	.	.	.	.	.	.	.	.	.	.	.	.	.	.	.	.	.	.	.	.	.	.	.	.	.	.	.
chr1	66344190	.	A	G	.	PASS	PDE4B	intronic	NM_001037339,NM_001037340,NM_001037341,NM_001297440,NM_001297441,NM_002600	.	.	.	ENST00000371045.9,ENST00000329654.8,ENST00000423207.6	1p31.3	.	.	.	.	.	.	.	.	.	.	.	.	.	.	.	.	.	.	.	.	.	.	.	.	.	.	.	.	.	.	.	.	.	.	.
chr1	66915665	.	T	C	.	PASS	WDR78	intronic	NM_024763,NM_207014	.	.	.	ENST00000371026.7,ENST00000371022.3,ENST00000371023.7	1p31.3	.	.	Score=2425;Name="151925:MER4-int(LTR)"	.	.	.	.	.	.	.	.	.	.	.	.	.	.	.	.	.	.	.	.	.	.	.	.	.	.	.	.	.	.	.	.
chr1	68526764	.	C	A	.	PASS	DEPDC1-AS1	ncRNA_intronic	NR_110671	.	.	.	ENST00000428732.1	1p31.2	.	.	.	.	.	.	.	.	.	.	.	.	.	.	.	.	.	.	.	.	.	.	.	.	.	.	.	.	.	.	.	.	.	.	.
chr1	68680679	.	T	G	.	PASS	.	intergenic	NR_110671,NR_146608	dist=142052;dist=375219	.	.	.	1p31.2	.	.	Score=1344;Name="155553:L1MEd(LINE)"	.	.	.	.	.	.	.	.	.	.	.	.	.	.	.	.	.	.	.	.	.	.	.	.	.	.	.	.	.	.	.	.
chr1	68896670	.	A	G	.	PASS	.	intergenic	NR_110671,NR_146608	dist=358043;dist=159228	.	.	.	1p31.2	.	.	Score=669;Name="155896:L2a(LINE)"	.	.	.	.	.	.	.	.	.	.	.	.	.	.	.	.	.	.	.	.	.	.	.	.	.	.	.	.	.	.	.	.
chr1	70117330	.	C	T	.	PASS	LRRC7	intronic	NM_001330635,NM_001350216,NM_020794	.	.	.	ENST00000415775.2,ENST00000310961.9,ENST00000035383.9	1p31.1	.	.	.	.	.	.	.	.	.	.	.	.	.	.	.	.	.	.	.	.	.	.	.	.	.	.	.	.	.	.	.	.	.	.	.
chr1	70599506	.	G	A	.	PASS	.	intergenic	NM_001902,NR_125938	dist=159655;dist=106947	.	.	.	1p31.1	.	.	Score=26189;Name="158860:L1PA3(LINE)"	.	.	.	.	.	.	.	.	.	.	.	.	.	.	.	.	.	.	.	.	.	.	.	.	.	.	.	.	.	.	.	.
chr1	70961259	.	G	A	.	PASS	PTGER3	intronic	NM_001126044,NM_198714,NM_198716,NM_198717,NM_198718	.	.	.	ENST00000356595.8,ENST00000460330.5,ENST00000628037.2,ENST00000370931.7,ENST00000370932.6	1p31.1	.	.	.	.	.	.	.	.	.	.	.	.	.	.	.	.	.	.	.	.	.	.	.	.	.	.	.	.	.	.	.	.	.	.	.
chr1	71764557	.	T	C	.	PASS	NEGR1	intronic	NM_173808	.	.	.	ENST00000357731.9,ENST00000306821.3,ENST00000434200.5	1p31.1	.	.	Score=9197;Name="160807:HSMAR1(DNA)"	.	.	.	.	.	.	.	.	.	.	.	.	.	.	.	.	.	.	.	.	.	.	.	.	.	.	.	.	.	.	.	.
chr1	71992264	.	G	T	.	PASS	NEGR1	intronic	NM_173808	.	.	.	ENST00000306821.3,ENST00000357731.9	1p31.1	.	.	Score=14;Name="161156:A-rich(Low_complexity)"	.	.	.	.	.	.	.	.	.	.	.	.	.	.	.	.	.	.	.	.	.	.	.	.	.	.	.	.	.	.	.	.
chr1	72174989	.	T	A	.	PASS	NEGR1	intronic	NM_173808	.	.	.	ENST00000357731.9	1p31.1	.	.	Score=1255;Name="161435:L1PA3(LINE)"	.	.	.	.	.	.	.	.	.	.	.	.	.	.	.	.	.	.	.	.	.	.	.	.	.	.	.	.	.	.	.	.
chr1	72378720	.	T	A	.	PASS	.	intergenic	NM_173808,NR_110677	dist=96126;dist=927450	.	.	.	1p31.1	.	.	Score=2222;Name="161737:AluSc8(SINE)"	.	.	.	.	.	.	.	.	.	.	.	.	.	.	.	.	.	.	.	.	.	.	.	.	.	.	.	.	.	.	.	.
chr1	72400588	.	C	A	.	PASS	.	intergenic	NM_173808,NR_110677	dist=117994;dist=905582	.	.	.	1p31.1	.	.	Score=2994;Name="161779:L1MEg(LINE)"	.	.	.	.	.	.	.	.	.	.	.	.	.	.	.	.	.	.	.	.	.	.	.	.	.	.	.	.	.	.	.	.
chr1	72569646	.	T	C	.	PASS	.	intergenic	NM_173808,NR_110677	dist=287052;dist=736524	.	.	.	1p31.1	.	.	.	.	.	.	.	.	.	.	.	.	.	.	.	.	.	.	.	.	.	.	.	.	.	.	.	.	.	.	.	.	.	.	.
chr1	72874653	.	A	G	.	PASS	.	intergenic	NM_173808,NR_110677	dist=592059;dist=431517	.	.	ENST00000445976.1	1p31.1	.	.	Score=2627;Name="162494:AluY(SINE)"	.	.	.	.	.	.	.	.	.	.	.	.	.	.	.	.	.	.	.	.	.	.	.	.	.	.	.	.	.	.	.	.
chr1	72916924	.	A	G	.	PASS	.	intergenic	NM_173808,NR_110677	dist=634330;dist=389246	.	.	.	1p31.1	.	.	.	.	.	.	.	.	.	.	.	.	.	.	.	.	.	.	.	.	.	.	.	.	.	.	.	.	.	.	.	.	.	.	.
chr1	72941286	rs998345217	T	C	.	PASS	.	intergenic	NM_173808,NR_110677	dist=658692;dist=364884	.	.	.	1p31.1	.	.	Score=59;Name="162597:(TCTA)n(Simple_repeat)"	rs998345217	.	.	.	.	.	.	.	.	.	.	.	.	.	.	.	.	.	.	.	.	.	.	.	.	.	.	.	.	.	.	.
chr1	73377484	.	C	A	.	PASS	.	intergenic	NR_110676,NR_146300	dist=38607;dist=297195	.	.	.	1p31.1	.	.	.	.	.	.	.	.	.	.	.	.	.	.	.	.	.	.	.	.	.	.	.	.	.	.	.	.	.	.	.	.	.	.	.
chr1	73699403	.	A	C	.	PASS	.	ncRNA_intronic	NR_146300	.	.	.	ENST00000424953.1	1p31.1	.	.	.	.	.	.	.	.	.	.	.	.	.	.	.	.	.	.	.	.	.	.	.	.	.	.	.	.	.	.	.	.	.	.	.
chr1	73823382	.	C	A	.	PASS	.	intergenic	NR_146300,NM_001322315	dist=84740;dist=202636	.	.	.	1p31.1	.	.	Score=1772;Name="163930:Kanga1(DNA)"	.	.	.	.	.	.	.	.	.	.	.	.	.	.	.	.	.	.	.	.	.	.	.	.	.	.	.	.	.	.	.	.
chr1	74005889	.	G	T	.	PASS	.	intergenic	NR_146300,NM_001322315	dist=267247;dist=20129	.	.	.	1p31.1	.	.	.	.	.	.	.	.	.	.	.	.	.	.	.	.	.	.	.	.	.	.	.	.	.	.	.	.	.	.	.	.	.	.	.
chr1	74125019	.	C	A	.	PASS	LRRIQ3	intronic	NM_001105659,NM_001322315	.	.	.	ENST00000354431.8,ENST00000395089.5,ENST00000370909.6	1p31.1	.	.	Score=19206;Name="164420:L1MA3(LINE)"	.	.	.	.	.	.	.	.	.	.	.	.	.	.	.	.	.	.	.	.	.	.	.	.	.	.	.	.	.	.	.	.
chr1	74798357	.	A	T	.	PASS	.	intergenic	NM_001162916,NM_001001933	dist=31681;dist=330077	.	.	.	1p31.1	.	.	Score=2356;Name="165501:MSTB(LTR)"	.	.	.	.	.	.	.	.	.	.	.	.	.	.	.	.	.	.	.	.	.	.	.	.	.	.	.	.	.	.	.	.
chr1	75840165	.	C	G	.	PASS	MSH4	intronic	NM_002440	.	.	.	ENST00000263187.3	1p31.1	.	.	Score=7754;Name="167241:L1PA3(LINE)"	.	.	.	.	.	.	.	.	.	.	.	.	.	.	.	.	.	.	.	.	.	.	.	.	.	.	.	.	.	.	.	.
chr1	75840408	.	C	T	.	PASS	MSH4	intronic	NM_002440	.	.	.	ENST00000263187.3	1p31.1	.	.	Score=7754;Name="167241:L1PA3(LINE)"	.	.	.	.	.	.	.	.	.	.	.	.	.	.	.	.	.	.	.	.	.	.	.	.	.	.	.	.	.	.	.	.
chr1	76137980	.	C	G	.	PASS	ST6GALNAC3	intronic	NM_001160011,NM_001349105,NM_001349106,NM_001349107,NM_001349108,NM_001349109,NM_001349110,NM_001349111,NM_152996	.	.	.	ENST00000328299.3	1p31.1	.	.	.	.	.	.	.	.	.	.	.	.	.	.	.	.	.	.	.	.	.	.	.	.	.	.	.	.	.	.	.	.	.	.	.
chr1	76439385	rs936719697	A	T	.	PASS	ST6GALNAC3	intronic	NM_001160011,NM_001349105,NM_001349106,NM_001349107,NM_001349108,NM_001349109,NM_001349110,NM_001349111,NM_152996	.	.	.	ENST00000328299.3	1p31.1	.	.	.	rs936719697	.	.	.	.	.	.	.	.	.	.	.	.	.	.	.	.	.	.	.	.	.	.	.	.	.	.	.	.	.	.	.
chr1	76504479	.	G	T	.	PASS	ST6GALNAC3	intronic	NM_001160011,NM_001349105,NM_001349106,NM_001349107,NM_001349108,NM_001349109,NM_001349110,NM_001349111,NM_152996	.	.	.	ENST00000328299.3	1p31.1	.	.	.	.	.	.	.	.	.	.	.	.	.	.	.	.	.	.	.	.	.	.	.	.	.	.	.	.	.	.	.	.	.	.	.
chr1	77536510	.	T	C	.	PASS	AK5	intronic	NM_012093,NM_174858	.	.	.	ENST00000478255.1,ENST00000354567.6,ENST00000344720.9	1p31.1	.	.	.	.	.	.	.	.	.	.	.	.	.	.	.	.	.	.	.	.	.	.	.	.	.	.	.	.	.	.	.	.	.	.	.
chr1	78926503	.	T	C	.	PASS	ADGRL4	intronic	NM_022159	.	.	.	ENST00000370742.3	1p31.1	.	.	.	.	.	.	.	.	.	.	.	.	.	.	.	.	.	.	.	.	.	.	.	.	.	.	.	.	.	.	.	.	.	.	.
chr1	79220488	.	C	A	.	PASS	.	intergenic	NM_022159,NR_125941	dist=213678;dist=1315267	.	.	.	1p31.1	.	.	Score=10579;Name="173326:THE1B-int(LTR)"	.	.	.	.	.	.	.	.	.	.	.	.	.	.	.	.	.	.	.	.	.	.	.	.	.	.	.	.	.	.	.	.
chr1	79897568	.	C	T	.	PASS	.	intergenic	NM_022159,NR_125941	dist=890758;dist=638187	.	.	.	1p31.1	.	.	.	.	.	.	.	.	.	.	.	.	.	.	.	.	.	.	.	.	.	.	.	.	.	.	.	.	.	.	.	.	.	.	.
chr1	80038345	.	T	C	.	PASS	.	intergenic	NM_022159,NR_125941	dist=1031535;dist=497410	.	.	.	1p31.1	.	.	.	.	.	.	.	.	.	.	.	.	.	.	.	.	.	.	.	.	.	.	.	.	.	.	.	.	.	.	.	.	.	.	.
chr1	80115118	.	C	A	.	PASS	.	intergenic	NM_022159,NR_125941	dist=1108308;dist=420637	.	.	ENST00000567886.1	1p31.1	.	.	.	.	.	.	.	.	.	.	.	.	.	.	.	.	.	.	.	.	.	.	.	.	.	.	.	.	.	.	.	.	.	.	.
chr1	80584507	.	C	G	.	PASS	LOC101927412	ncRNA_intronic	NR_125940,NR_125941	.	.	.	ENST00000443104.5	1p31.1	.	.	.	.	.	.	.	.	.	.	.	.	.	.	.	.	.	.	.	.	.	.	.	.	.	.	.	.	.	.	.	.	.	.	.
chr1	80637005	.	A	C	.	PASS	LOC101927412	ncRNA_intronic	NR_125940,NR_125941	.	.	.	ENST00000443104.5	1p31.1	.	.	Score=24300;Name="175591:MER61-int(LTR)"	.	.	.	.	.	.	.	.	.	.	.	.	.	.	.	.	.	.	.	.	.	.	.	.	.	.	.	.	.	.	.	.
chr1	80937332	.	T	G	.	PASS	.	intergenic	NR_125941,NR_125943	dist=290544;dist=576548	.	.	.	1p31.1	.	.	Score=7118;Name="176011:L1MB7(LINE)"	.	.	.	.	.	.	.	.	.	.	.	.	.	.	.	.	.	.	.	.	.	.	.	.	.	.	.	.	.	.	.	.
chr1	81963083	.	G	A	.	PASS	ADGRL2	intronic	NM_001297704,NM_001297705,NM_001297706,NM_001330645,NM_001350698,NM_001350699,NM_012302	.	.	.	ENST00000370727.5,ENST00000370728.5,ENST00000370715.5,ENST00000370723.5,ENST00000359929.7,ENST00000370717.6,ENST00000370725.5,ENST00000370713.5,ENST00000319517.10,ENST00000370721.5,ENST00000627151.2,ENST00000370730.5	1p31.1	.	.	Score=1168;Name="177635:L1M5(LINE)"	.	.	.	.	.	.	.	.	.	.	.	.	.	.	.	.	.	.	.	.	.	.	.	.	.	.	.	.	.	.	.	.
chr1	82002295	.	G	A	.	PASS	.	intergenic	NM_001297704,NR_147074	dist=8363;dist=900888	.	.	.	1p31.1	.	.	Score=2304;Name="177671:AluSc(SINE)"	.	.	.	.	.	.	.	.	.	.	.	.	.	.	.	.	.	.	.	.	.	.	.	.	.	.	.	.	.	.	.	.
chr1	82023220	.	A	G	.	PASS	.	intergenic	NM_001297704,NR_147074	dist=29288;dist=879963	.	.	.	1p31.1	.	.	.	.	.	.	.	.	.	.	.	.	.	.	.	.	.	.	.	.	.	.	.	.	.	.	.	.	.	.	.	.	.	.	.
chr1	82115341	.	C	T	.	PASS	.	intergenic	NM_001297704,NR_147074	dist=121409;dist=787842	.	.	.	1p31.1	.	.	Score=343;Name="177861:L2a(LINE)"	.	.	.	.	.	.	.	.	.	.	.	.	.	.	.	.	.	.	.	.	.	.	.	.	.	.	.	.	.	.	.	.
chr1	82941262	.	C	G	.	PASS	.	ncRNA_intronic	NR_147074	.	.	.	ENST00000452901.5,ENST00000419658.1	1p31.1	.	.	.	.	.	.	.	.	.	.	.	.	.	.	.	.	.	.	.	.	.	.	.	.	.	.	.	.	.	.	.	.	.	.	.
chr1	83211004	.	T	G	.	PASS	.	intergenic	NR_147074,NR_146478	dist=44189;dist=235050	.	.	.	1p31.1	.	Score=0.984668;Name=chr7:76651384	Score=248;Name="179664:L1ME4a(LINE)"	.	.	.	.	.	.	.	.	.	.	.	.	.	.	.	.	.	.	.	.	.	.	.	.	.	.	.	.	.	.	.	.
chr1	83220237	rs2538501	T	C	.	PASS	.	intergenic	NR_147074,NR_146478	dist=53422;dist=225817	.	.	.	1p31.1	.	Score=0.984668;Name=chr7:76651384	Score=979;Name="179676:MLT1F-int(LTR)"	rs2538501	.	.	.	.	.	.	.	.	.	.	.	.	.	.	.	.	.	.	.	.	.	.	.	.	.	.	.	.	.	.	.
chr1	83423310	rs2786351	T	C	.	PASS	.	intergenic	NR_147074,NR_146478	dist=256495;dist=22744	.	.	.	1p31.1	.	Score=0.984668;Name=chr7:76651384	.	rs2786351	.	.	.	.	.	.	.	0.7004	0.6462	0.501	0.584	0.5432	0.597244	.	.	.	.	.	.	.	.	.	.	.	.	.	.	.	.	.	.
chr1	83504280	.	T	G	.	PASS	.	intergenic	NR_146478,NR_119375	dist=49509;dist=71509	.	.	.	1p31.1	.	.	.	.	.	.	.	.	.	.	.	.	.	.	.	.	.	.	.	.	.	.	.	.	.	.	.	.	.	.	.	.	.	.	.
chr1	83720278	.	A	T	.	PASS	LOC101927587	ncRNA_intronic	NR_119375	.	.	.	ENST00000417975.1	1p31.1	.	.	Score=1202;Name="180479:L1ME3(LINE)"	.	.	.	.	.	.	.	.	.	.	.	.	.	.	.	.	.	.	.	.	.	.	.	.	.	.	.	.	.	.	.	.
chr1	83864582	.	A	C	.	PASS	.	downstream	NM_001350214,NM_001350215,NM_024686	.	.	.	.	1p31.1	.	.	.	.	.	.	.	.	.	.	.	.	.	.	.	.	.	.	.	.	.	.	.	.	.	.	.	.	.	.	.	.	.	.	.
chr1	85727110	.	A	C	.	PASS	.	intergenic	NM_001170670,NM_152890	dist=18677;dist=2123	.	.	.	1p22.3	.	.	Score=3197;Name="184189:L1MB4(LINE)"	.	.	.	.	.	.	.	.	.	.	.	.	.	.	.	.	.	.	.	.	.	.	.	.	.	.	.	.	.	.	.	.
chr1	85727112	.	A	C	.	PASS	.	intergenic	NM_001170670,NM_152890	dist=18679;dist=2121	.	.	.	1p22.3	.	.	Score=3197;Name="184189:L1MB4(LINE)"	.	.	.	.	.	.	.	.	.	.	.	.	.	.	.	.	.	.	.	.	.	.	.	.	.	.	.	.	.	.	.	.
chr1	86490273	.	A	C	.	PASS	CLCA1	intronic	NM_001285	.	.	.	ENST00000394711.1,ENST00000234701.7	1p22.3	.	.	Score=1192;Name="185434:LTR16A1(LTR)"	.	.	.	.	.	.	.	.	.	.	.	.	.	.	.	.	.	.	.	.	.	.	.	.	.	.	.	.	.	.	.	.
chr1	87033572	.	T	A	.	PASS	HS2ST1	intronic	NM_001134492,NM_012262	.	.	.	ENST00000370551.8,ENST00000370548.3,ENST00000370550.9	1p22.3	.	.	Score=2367;Name="186422:AluSq2(SINE)"	.	.	.	.	.	.	.	.	.	.	.	.	.	.	.	.	.	.	.	.	.	.	.	.	.	.	.	.	.	.	.	.
chr1	87788364	.	C	A	.	PASS	.	intergenic	NR_038324,NR_110682	dist=416709;dist=749149	.	.	.	1p22.3	.	.	.	.	.	.	.	.	.	.	.	.	.	.	.	.	.	.	.	.	.	.	.	.	.	.	.	.	.	.	.	.	.	.	.
chr1	88239861	.	A	C	.	PASS	.	intergenic	NR_038324,NR_110682	dist=868206;dist=297652	.	.	.	1p22.2	.	.	.	.	.	.	.	.	.	.	.	.	.	.	.	.	.	.	.	.	.	.	.	.	.	.	.	.	.	.	.	.	.	.	.
chr1	88702256	.	G	T	.	PASS	PKN2	intronic	NM_001320707,NM_001320708,NM_001320709,NM_006256	.	.	.	ENST00000370521.7,ENST00000316005.11,ENST00000370505.7,ENST00000370513.9	1p22.2	.	.	Score=2146;Name="189177:AluSx(SINE)"	.	.	.	.	.	.	.	.	.	.	.	.	.	.	.	.	.	.	.	.	.	.	.	.	.	.	.	.	.	.	.	.
chr1	89051560	.	T	A	.	PASS	.	downstream	NM_002053	.	.	.	.	1p22.2	.	Score=0.925615;Name=chr1:89399224	.	.	.	.	.	.	.	.	.	.	.	.	.	.	.	.	.	.	.	.	.	.	.	.	.	.	.	.	.	.	.	.	.
chr1	89421708	.	A	G	.	PASS	GBP1P1	ncRNA_intronic	NR_003133	.	.	.	.	1p22.2	.	Score=0.925615;Name=chr1:89043831	Score=252;Name="190385:L2c(LINE)"	.	.	.	.	.	.	.	.	.	.	.	.	.	.	.	.	.	.	.	.	.	.	.	.	.	.	.	.	.	.	.	.
chr1	89964555	.	T	G	.	PASS	.	intergenic	NM_001134479,NR_002830	dist=28125;dist=28710	.	.	.	1p22.2	.	.	Score=2374;Name="191331:AluSz(SINE)"	.	.	.	.	.	.	.	.	.	.	.	.	.	.	.	.	.	.	.	.	.	.	.	.	.	.	.	.	.	.	.	.
chr1	90504011	.	C	G	.	PASS	.	intergenic	NM_181781,NR_145742	dist=468481;dist=153739	.	.	.	1p22.2	.	.	.	.	.	.	.	.	.	.	.	.	.	.	.	.	.	.	.	.	.	.	.	.	.	.	.	.	.	.	.	.	.	.	.
chr1	90648661	.	C	G	.	PASS	.	intergenic	NM_181781,NR_145742	dist=613131;dist=9089	.	.	.	1p22.2	.	.	.	.	.	.	.	.	.	.	.	.	.	.	.	.	.	.	.	.	.	.	.	.	.	.	.	.	.	.	.	.	.	.	.
chr1	91605291	.	T	G	.	PASS	.	intergenic	NM_001134419,NM_003243	dist=79527;dist=75052	.	.	.	1p22.1	.	.	Score=914;Name="194216:AluSx3(SINE)"	.	.	.	.	.	.	.	.	.	.	.	.	.	.	.	.	.	.	.	.	.	.	.	.	.	.	.	.	.	.	.	.
chr1	91821237	.	T	G	.	PASS	TGFBR3	intronic	NM_001195683,NM_001195684,NM_003243	.	.	.	ENST00000465892.6,ENST00000370399.6,ENST00000212355.8,ENST00000525962.5	1p22.1	.	.	Score=2198;Name="194611:AluSx(SINE)"	.	.	.	.	.	.	.	.	.	.	.	.	.	.	.	.	.	.	.	.	.	.	.	.	.	.	.	.	.	.	.	.
chr1	92396997	.	A	C	.	PASS	.	intergenic	NM_024813,NM_005263	dist=8822;dist=77764	.	.	ENST00000610020.1	1p22.1	.	.	Score=957;Name="195943:L1MB8(LINE)"	.	.	.	.	.	.	.	.	.	.	.	.	.	.	.	.	.	.	.	.	.	.	.	.	.	.	.	.	.	.	.	.
chr1	92989526	.	T	G	.	PASS	.	intergenic	NM_001252273,NM_001164391	dist=28004;dist=89709	.	.	.	1p22.1	.	.	Score=786;Name="197302:AluJr4(SINE)"	.	.	.	.	.	.	.	.	.	.	.	.	.	.	.	.	.	.	.	.	.	.	.	.	.	.	.	.	.	.	.	.
chr1	93581426	.	T	A	.	PASS	BCAR3	intronic	NM_001261408,NM_001261409,NM_001261410,NM_001308251,NM_003567	.	.	.	ENST00000539242.5,ENST00000370244.5,ENST00000370247.7,ENST00000260502.10,ENST00000370243.1	1p22.1	.	.	Score=2122;Name="198603:AluSp(SINE)"	.	.	.	.	.	.	.	.	.	.	.	.	.	.	.	.	.	.	.	.	.	.	.	.	.	.	.	.	.	.	.	.
chr1	94198520	.	T	C	.	PASS	ARHGAP29	intronic	NM_001328664,NM_001328665,NM_001328666,NM_001328667,NM_004815	.	.	.	ENST00000260526.10	1p22.1	.	.	Score=7535;Name="199650:L1MEf(LINE)"	.	.	.	.	.	.	.	.	.	.	.	.	.	.	.	.	.	.	.	.	.	.	.	.	.	.	.	.	.	.	.	.
chr1	96062174	.	T	G	.	PASS	.	intergenic	NR_125991,NR_110693	dist=39294;dist=191895	.	.	.	1p21.3	.	.	.	.	.	.	.	.	.	.	.	.	.	.	.	.	.	.	.	.	.	.	.	.	.	.	.	.	.	.	.	.	.	.	.
chr1	96539956	.	T	C	.	PASS	.	intergenic	NR_110693,NM_001300987	dist=165831;dist=181649	.	.	.	1p21.3	.	.	.	.	.	.	.	.	.	.	.	.	.	.	.	.	.	.	.	.	.	.	.	.	.	.	.	.	.	.	.	.	.	.	.
chr1	96611083	.	T	G	.	PASS	.	intergenic	NR_110693,NM_001300987	dist=236958;dist=110522	.	.	.	1p21.3	.	.	.	.	.	.	.	.	.	.	.	.	.	.	.	.	.	.	.	.	.	.	.	.	.	.	.	.	.	.	.	.	.	.	.
chr1	96763011	.	T	G	.	PASS	PTBP2	intronic	NM_001300985,NM_001300986,NM_001300987,NM_001300988,NM_001300989,NM_001300990,NM_021190	.	.	.	ENST00000426398.2,ENST00000609116.5,ENST00000370198.5,ENST00000370197.5	1p21.3	.	.	Score=6048;Name="204157:SVA_D(Retroposon)"	.	.	.	.	.	.	.	.	.	.	.	.	.	.	.	.	.	.	.	.	.	.	.	.	.	.	.	.	.	.	.	.
chr1	98665445	.	A	G	.	PASS	SNX7	intronic	NM_015976,NM_152238	.	.	.	ENST00000306121.7,ENST00000529992.5	1p21.3	.	.	Score=616;Name="207236:L3(LINE)"	.	.	.	.	.	.	.	.	.	.	.	.	.	.	.	.	.	.	.	.	.	.	.	.	.	.	.	.	.	.	.	.
chr1	99291083	.	A	T	.	PASS	PLPPR4	intronic	NM_001166252,NM_014839	.	.	.	ENST00000457765.5,ENST00000370185.7	1p21.3	.	.	Score=10103;Name="208302:L1PA12(LINE)"	.	.	.	.	.	.	.	.	.	.	.	.	.	.	.	.	.	.	.	.	.	.	.	.	.	.	.	.	.	.	.	.
chr1	99868000	.	T	A	.	PASS	AGL	intronic	NM_000028,NM_000642,NM_000643,NM_000644,NM_000646	.	.	.	ENST00000294724.8,ENST00000361302.7,ENST00000370161.6,ENST00000361915.7,ENST00000370163.7,ENST00000370165.7,ENST00000361522.4	1p21.2	.	.	Score=827;Name="209365:L1M4b(LINE)"	.	.	.	.	.	.	.	.	.	.	.	.	.	.	.	.	.	.	.	.	.	.	.	.	.	.	.	.	.	.	.	.
chr1	100058953	.	T	C	.	PASS	MFSD14A	intronic	NM_033055	.	.	.	ENST00000432294.1,ENST00000370152.7	1p21.2	.	.	.	.	.	.	.	.	.	.	.	.	.	.	.	.	.	.	.	.	.	.	.	.	.	.	.	.	.	.	.	.	.	.	.
chr1	100120975	rs551154670	G	A	.	PASS	SASS6	intronic	NM_001304829,NM_194292	.	.	.	ENST00000287482.5	1p21.2	.	.	Score=2871;Name="209951:AluYa5(SINE)"	rs551154670	.	.	.	.	.	.	.	.	.	.	.	0.0014	0.000199681	.	.	.	.	.	.	.	.	.	.	.	.	.	.	.	.	.	.
chr1	101587510	.	A	C	.	PASS	.	intergenic	NR_126402,NM_058170	dist=210197;dist=215057	.	.	.	1p21.2	.	.	.	.	.	.	.	.	.	.	.	.	.	.	.	.	.	.	.	.	.	.	.	.	.	.	.	.	.	.	.	.	.	.	.
chr1	101799149	rs555265720	C	T	.	PASS	.	intergenic	NR_126402,NM_058170	dist=421836;dist=3418	.	.	.	1p21.2	.	.	.	rs555265720	.	.	.	.	.	.	.	.	.	.	0.0008	.	0.000199681	.	.	.	.	.	.	.	.	.	.	.	.	.	.	.	.	.	.
chr1	101875897	.	A	T	.	PASS	DNAJA1P5	ncRNA_intronic	NR_033424	.	.	.	ENST00000370103.8	1p21.1	.	.	.	.	.	.	.	.	.	.	.	.	.	.	.	.	.	.	.	.	.	.	.	.	.	.	.	.	.	.	.	.	.	.	.
chr1	102237004	.	A	T	.	PASS	.	intergenic	NM_058170,NM_080630	dist=239770;dist=639463	.	.	ENST00000447916.1	1p21.1	.	.	Score=573;Name="213722:L1ME3A(LINE)"	.	.	.	.	.	.	.	.	.	.	.	.	.	.	.	.	.	.	.	.	.	.	.	.	.	.	.	.	.	.	.	.
chr1	102698147	.	T	A	.	PASS	.	intergenic	NM_058170,NM_080630	dist=700913;dist=178320	.	.	.	1p21.1	.	.	.	.	.	.	.	.	.	.	.	.	.	.	.	.	.	.	.	.	.	.	.	.	.	.	.	.	.	.	.	.	.	.	.
chr1	102836922	.	T	A	.	PASS	.	intergenic	NM_058170,NM_080630	dist=839688;dist=39545	.	.	ENST00000414418.1	1p21.1	.	.	Score=2670;Name="214739:HERVK3-int(LTR)"	.	.	.	.	.	.	.	.	.	.	.	.	.	.	.	.	.	.	.	.	.	.	.	.	.	.	.	.	.	.	.	.
chr1	103468823	.	G	A	.	PASS	LOC101928436	intronic	NM_001286997,NM_001347929,NM_001347930	.	.	.	ENST00000447322.2,ENST00000444810.5	1p21.1	.	.	.	.	.	.	.	.	.	.	.	.	.	.	.	.	.	.	.	.	.	.	.	.	.	.	.	.	.	.	.	.	.	.	.
chr1	103929110	.	C	G	.	PASS	.	intergenic	NM_001346780,NR_033990	dist=170418;dist=143913	.	.	.	1p21.1	.	.	.	.	.	.	.	.	.	.	.	.	.	.	.	.	.	.	.	.	.	.	.	.	.	.	.	.	.	.	.	.	.	.	.
chr1	103932173	.	A	C	.	PASS	.	intergenic	NM_001346780,NR_033990	dist=173481;dist=140850	.	.	.	1p21.1	.	.	Score=469;Name="216306:L2a(LINE)"	.	.	.	.	.	.	.	.	.	.	.	.	.	.	.	.	.	.	.	.	.	.	.	.	.	.	.	.	.	.	.	.
chr1	104159378	.	A	C	.	PASS	.	intergenic	NR_033990,NR_125955	dist=82307;dist=1430316	.	.	.	1p21.1	.	.	Score=9664;Name="216650:L1MA2(LINE)"	.	.	.	.	.	.	.	.	.	.	.	.	.	.	.	.	.	.	.	.	.	.	.	.	.	.	.	.	.	.	.	.
chr1	104225185	.	T	A	.	PASS	.	intergenic	NR_033990,NR_125955	dist=148114;dist=1364509	.	.	.	1p21.1	.	.	.	.	.	.	.	.	.	.	.	.	.	.	.	.	.	.	.	.	.	.	.	.	.	.	.	.	.	.	.	.	.	.	.
chr1	104278544	.	C	A	.	PASS	.	intergenic	NR_033990,NR_125955	dist=201473;dist=1311150	.	.	.	1p21.1	.	.	.	.	.	.	.	.	.	.	.	.	.	.	.	.	.	.	.	.	.	.	.	.	.	.	.	.	.	.	.	.	.	.	.
chr1	104393543	.	C	G	.	PASS	.	intergenic	NR_033990,NR_125955	dist=316472;dist=1196151	.	.	.	1p21.1	.	.	Score=1081;Name="217002:L1MA3(LINE)"	.	.	.	.	.	.	.	.	.	.	.	.	.	.	.	.	.	.	.	.	.	.	.	.	.	.	.	.	.	.	.	.
chr1	104442635	.	T	C	.	PASS	.	intergenic	NR_033990,NR_125955	dist=365564;dist=1147059	.	.	.	1p21.1	.	.	Score=2175;Name="217080:AluY(SINE)"	.	.	.	.	.	.	.	.	.	.	.	.	.	.	.	.	.	.	.	.	.	.	.	.	.	.	.	.	.	.	.	.
chr1	104759669	.	C	T	.	PASS	.	intergenic	NR_033990,NR_125955	dist=682598;dist=830025	.	.	.	1p21.1	.	.	.	.	.	.	.	.	.	.	.	.	.	.	.	.	.	.	.	.	.	.	.	.	.	.	.	.	.	.	.	.	.	.	.
chr1	104759670	.	T	C	.	PASS	.	intergenic	NR_033990,NR_125955	dist=682599;dist=830024	.	.	.	1p21.1	.	.	.	.	.	.	.	.	.	.	.	.	.	.	.	.	.	.	.	.	.	.	.	.	.	.	.	.	.	.	.	.	.	.	.
chr1	104768939	.	C	A	.	PASS	.	intergenic	NR_033990,NR_125955	dist=691868;dist=820755	.	.	.	1p21.1	.	.	.	.	.	.	.	.	.	.	.	.	.	.	.	.	.	.	.	.	.	.	.	.	.	.	.	.	.	.	.	.	.	.	.
chr1	104954311	.	A	G	.	PASS	.	intergenic	NR_033990,NR_125955	dist=877240;dist=635383	.	.	.	1p21.1	.	.	.	.	.	.	.	.	.	.	.	.	.	.	.	.	.	.	.	.	.	.	.	.	.	.	.	.	.	.	.	.	.	.	.
chr1	105023028	.	A	C	.	PASS	.	intergenic	NR_033990,NR_125955	dist=945957;dist=566666	.	.	.	1p21.1	.	.	.	.	.	.	.	.	.	.	.	.	.	.	.	.	.	.	.	.	.	.	.	.	.	.	.	.	.	.	.	.	.	.	.
chr1	105327645	.	T	A	.	PASS	.	intergenic	NR_033990,NR_125955	dist=1250574;dist=262049	.	.	.	1p21.1	.	.	Score=1204;Name="218413:BLACKJACK(DNA)"	.	.	.	.	.	.	.	.	.	.	.	.	.	.	.	.	.	.	.	.	.	.	.	.	.	.	.	.	.	.	.	.
chr1	105430045	.	A	C	.	PASS	.	intergenic	NR_033990,NR_125955	dist=1352974;dist=159649	.	.	.	1p21.1	.	.	.	.	.	.	.	.	.	.	.	.	.	.	.	.	.	.	.	.	.	.	.	.	.	.	.	.	.	.	.	.	.	.	.
chr1	105650439	.	C	G	.	PASS	.	intergenic	NR_125955,NR_146609	dist=31504;dist=277185	.	.	.	1p21.1	.	.	.	.	.	.	.	.	.	.	.	.	.	.	.	.	.	.	.	.	.	.	.	.	.	.	.	.	.	.	.	.	.	.	.
chr1	105847859	.	T	A	.	PASS	.	intergenic	NR_125955,NR_146609	dist=228924;dist=79765	.	.	.	1p21.1	.	.	Score=1226;Name="219230:L2(LINE)"	.	.	.	.	.	.	.	.	.	.	.	.	.	.	.	.	.	.	.	.	.	.	.	.	.	.	.	.	.	.	.	.
chr1	106362581	.	A	C	.	PASS	.	intergenic	NR_146609,NR_147165	dist=334328;dist=455658	.	.	.	1p21.1	.	.	Score=1064;Name="220003:L1MD2(LINE)"	.	.	.	.	.	.	.	.	.	.	.	.	.	.	.	.	.	.	.	.	.	.	.	.	.	.	.	.	.	.	.	.
chr1	106529740	.	A	T	.	PASS	.	intergenic	NR_146609,NR_147165	dist=501487;dist=288499	.	.	.	1p21.1	.	.	Score=5428;Name="220266:L1PA15(LINE)"	.	.	.	.	.	.	.	.	.	.	.	.	.	.	.	.	.	.	.	.	.	.	.	.	.	.	.	.	.	.	.	.
chr1	106765922	.	G	T	.	PASS	.	intergenic	NR_146609,NR_147165	dist=737669;dist=52317	.	.	.	1p13.3	.	.	.	.	.	.	.	.	.	.	.	.	.	.	.	.	.	.	.	.	.	.	.	.	.	.	.	.	.	.	.	.	.	.	.
chr1	106930234	.	A	C	.	PASS	.	intergenic	NR_147165,NM_018137	dist=92041;dist=126411	.	.	.	1p13.3	.	.	Score=25646;Name="220900:L1PA5(LINE)"	.	.	.	.	.	.	.	.	.	.	.	.	.	.	.	.	.	.	.	.	.	.	.	.	.	.	.	.	.	.	.	.
chr1	106975067	.	T	G	.	PASS	.	intergenic	NR_147165,NM_018137	dist=136874;dist=81578	.	.	.	1p13.3	.	.	.	.	.	.	.	.	.	.	.	.	.	.	.	.	.	.	.	.	.	.	.	.	.	.	.	.	.	.	.	.	.	.	.
chr1	107637124	.	G	T	.	PASS	VAV3	intronic	NM_001079874,NM_006113	.	.	.	ENST00000527011.5,ENST00000370056.8,ENST00000415432.6	1p13.3	.	.	Score=5946;Name="222112:L1ME1(LINE)"	.	.	.	.	.	.	.	.	.	.	.	.	.	.	.	.	.	.	.	.	.	.	.	.	.	.	.	.	.	.	.	.
chr1	108126102	.	A	T	.	PASS	.	intergenic	NR_046653,NM_013386	dist=131495;dist=8620	.	.	.	1p13.3	.	.	.	.	.	.	.	.	.	.	.	.	.	.	.	.	.	.	.	.	.	.	.	.	.	.	.	.	.	.	.	.	.	.	.
chr1	108348813	.	C	G	.	PASS	.	intergenic	NM_001143989,NM_001143988	dist=104732;dist=101469	.	.	.	1p13.3	.	.	Score=2601;Name="223250:AluY(SINE)"	.	.	.	.	.	.	.	.	.	.	.	.	.	.	.	.	.	.	.	.	.	.	.	.	.	.	.	.	.	.	.	.
chr1	109076006	.	T	G	.	PASS	.	upstream	NM_005645	.	.	.	.	1p13.3	.	.	.	.	.	.	.	.	.	.	.	.	.	.	.	.	.	.	.	.	.	.	.	.	.	.	.	.	.	.	.	.	.	.	.
chr1	109763766	rs900452103	T	G	.	PASS	EPS8L3	intronic	NM_001319952,NM_024526,NM_133181,NM_139053	.	.	.	ENST00000431955.1,ENST00000361852.8,ENST00000361965.8,ENST00000369805.7	1p13.3	.	.	.	rs900452103	.	.	.	.	.	.	.	.	.	.	.	.	.	.	.	.	.	.	.	.	.	.	.	.	.	.	.	.	.	.	.
chr1	110162543	.	T	G	.	PASS	SLC6A17	intronic	NM_001010898	.	.	.	ENST00000331565.4	1p13.3	.	.	.	.	.	.	.	.	.	.	.	.	.	.	.	.	.	.	.	.	.	.	.	.	.	.	.	.	.	.	.	.	.	.	.
chr1	110763583	.	C	G	.	PASS	.	intergenic	NM_002232,NM_001040033	dist=88550;dist=107616	.	.	.	1p13.3	.	Score=0.944172;Name=chr5:40158167	Score=2169;Name="227971:HAL1(LINE)"	.	.	.	.	.	.	.	.	.	.	.	.	.	.	.	.	.	.	.	.	.	.	.	.	.	.	.	.	.	.	.	.
chr1	111341220	.	A	C	.	PASS	.	intergenic	NM_021797,NM_181643	dist=20654;dist=5340	.	.	.	1p13.2	.	.	Score=27646;Name="228873:L1PA3(LINE)"	.	.	.	.	.	.	.	.	.	.	.	.	.	.	.	.	.	.	.	.	.	.	.	.	.	.	.	.	.	.	.	.
chr1	111560258	.	A	G	.	PASS	TMIGD3	intronic	NM_001081976,NM_001302680	.	.	.	ENST00000369717.8,ENST00000356415.5	1p13.2	.	.	.	.	.	.	.	.	.	.	.	.	.	.	.	.	.	.	.	.	.	.	.	.	.	.	.	.	.	.	.	.	.	.	.
chr1	111779677	.	T	G	.	PASS	KCND3	intronic	NM_004980,NM_172198	.	.	.	ENST00000369697.5,ENST00000315987.6,ENST00000302127.4	1p13.2	.	.	Score=185;Name="229685:AmnSINE2(SINE)"	.	.	.	.	.	.	.	.	.	.	.	.	.	.	.	.	.	.	.	.	.	.	.	.	.	.	.	.	.	.	.	.
chr1	111989347	.	A	G	.	PASS	.	upstream	NM_004980,NM_172198	.	.	.	.	1p13.2	.	.	.	.	.	.	.	.	.	.	.	.	.	.	.	.	.	.	.	.	.	.	.	.	.	.	.	.	.	.	.	.	.	.	.
chr1	112518739	.	C	G	.	PASS	WNT2B	intronic	NM_001291880,NM_004185,NM_024494	.	.	.	ENST00000369686.9,ENST00000256640.9,ENST00000369684.4	1p13.2	.	.	.	.	.	.	.	.	.	.	.	.	.	.	.	.	.	.	.	.	.	.	.	.	.	.	.	.	.	.	.	.	.	.	.
chr1	112767940	.	A	C	.	PASS	.	intergenic	NM_001004440,NR_103746	dist=40706;dist=52229	.	.	.	1p13.2	.	.	Score=418;Name="231687:MLT1J(LTR)"	.	.	.	.	.	.	.	.	.	.	.	.	.	.	.	.	.	.	.	.	.	.	.	.	.	.	.	.	.	.	.	.
chr1	112773857	.	G	A	.	PASS	.	intergenic	NM_001004440,NR_103746	dist=46623;dist=46312	.	.	.	1p13.2	.	.	Score=1385;Name="231707:SVA_F(Retroposon)"	.	.	.	.	.	.	.	.	.	.	.	.	.	.	.	.	.	.	.	.	.	.	.	.	.	.	.	.	.	.	.	.
chr1	113141159	.	T	G	.	PASS	.	intergenic	NM_014813,NR_038846	dist=15957;dist=55622	.	.	.	1p13.2	.	.	.	.	.	.	.	.	.	.	.	.	.	.	.	.	.	.	.	.	.	.	.	.	.	.	.	.	.	.	.	.	.	.	.
chr1	113236270	.	C	G	.	PASS	.	intergenic	NR_038846,NM_001142782	dist=30017;dist=154583	.	.	.	1p13.2	.	.	Score=2391;Name="232900:L1MC5(LINE)"	.	.	.	.	.	.	.	.	.	.	.	.	.	.	.	.	.	.	.	.	.	.	.	.	.	.	.	.	.	.	.	.
chr1	114027827	.	C	G	.	PASS	.	intergenic	NM_020190,NM_205848	dist=45573;dist=61465	.	.	.	1p13.2	.	.	.	.	.	.	.	.	.	.	.	.	.	.	.	.	.	.	.	.	.	.	.	.	.	.	.	.	.	.	.	.	.	.	.
chr1	114129673	.	C	A	.	PASS	SYT6	intronic	NM_001270805,NM_205848	.	.	.	ENST00000609117.5,ENST00000369547.5,ENST00000610222.1,ENST00000607941.5	1p13.2	.	.	Score=135;Name="234561:(TTCT)n(Simple_repeat)"	.	.	.	.	.	.	.	.	.	.	.	.	.	.	.	.	.	.	.	.	.	.	.	.	.	.	.	.	.	.	.	.
chr1	114346264	.	T	G	.	PASS	.	intergenic	NM_001270805,NM_015906	dist=192414;dist=46513	.	.	.	1p13.2	.	.	.	.	.	.	.	.	.	.	.	.	.	.	.	.	.	.	.	.	.	.	.	.	.	.	.	.	.	.	.	.	.	.	.
chr1	115805134	.	G	T	.	PASS	.	intergenic	NM_001232,NM_005599	dist=36329;dist=31244	.	.	.	1p13.1	.	.	.	.	.	.	.	.	.	.	.	.	.	.	.	.	.	.	.	.	.	.	.	.	.	.	.	.	.	.	.	.	.	.	.
chr1	115971023	.	T	G	.	PASS	LOC101928977	ncRNA_intronic	NR_125970	.	.	.	.	1p13.1	.	.	Score=2287;Name="238164:AluSx(SINE)"	.	.	.	.	.	.	.	.	.	.	.	.	.	.	.	.	.	.	.	.	.	.	.	.	.	.	.	.	.	.	.	.
chr1	116696763	.	G	C	.	PASS	C1orf137	intronic	NM_001013643	.	.	.	ENST00000624685.1	1p13.1	.	.	.	.	.	.	.	.	.	.	.	.	.	.	.	.	.	.	.	.	.	.	.	.	.	.	.	.	.	.	.	.	.	.	.
chr1	117051152	.	G	T	.	PASS	LOC101929099	ncRNA_intronic	NR_110786	.	.	.	ENST00000445523.1	1p13.1	.	.	Score=360;Name="240169:L3(LINE)"	.	.	.	.	.	.	.	.	.	.	.	.	.	.	.	.	.	.	.	.	.	.	.	.	.	.	.	.	.	.	.	.
chr1	118366900	.	T	A	.	PASS	.	intergenic	NM_206996,NM_152380	dist=181631;dist=516143	.	.	.	1p12	.	.	Score=322;Name="242552:MIRb(SINE)"	.	.	.	.	.	.	.	.	.	.	.	.	.	.	.	.	.	.	.	.	.	.	.	.	.	.	.	.	.	.	.	.
chr1	118421756	.	T	A	.	PASS	.	intergenic	NM_206996,NM_152380	dist=236487;dist=461287	.	.	.	1p12	.	.	.	.	.	.	.	.	.	.	.	.	.	.	.	.	.	.	.	.	.	.	.	.	.	.	.	.	.	.	.	.	.	.	.
chr1	118618633	.	T	C	.	PASS	.	intergenic	NM_206996,NM_152380	dist=433364;dist=264410	.	.	.	1p12	.	.	Score=20921;Name="242946:L1MA2(LINE)"	.	.	.	.	.	.	.	.	.	.	.	.	.	.	.	.	.	.	.	.	.	.	.	.	.	.	.	.	.	.	.	.
chr1	118646692	.	A	C	.	PASS	.	intergenic	NM_206996,NM_152380	dist=461423;dist=236351	.	.	.	1p12	.	.	Score=17;Name="242976:(TAGA)n(Simple_repeat)"	.	.	.	.	.	.	.	.	.	.	.	.	.	.	.	.	.	.	.	.	.	.	.	.	.	.	.	.	.	.	.	.
chr1	119177957	.	G	T	.	PASS	LOC101929147	ncRNA_intronic	NR_125974,NR_125975,NR_125976	.	.	.	ENST00000440150.5,ENST00000418015.1	1p12	.	.	Score=52458;Name="243828:HERV9NC-int(LTR)"	.	.	.	.	.	.	.	.	.	.	.	.	.	.	.	.	.	.	.	.	.	.	.	.	.	.	.	.	.	.	.	.
chr1	119612414	rs4659213	A	G	.	PASS	.	intergenic	NR_036540,NM_001080470	dist=13123;dist=6963	.	.	.	1p12	.	Score=0.926446;Name=chr1:119555953	Score=259;Name="244513:L1ME3Cz(LINE)"	rs4659213	.	.	.	.	.	.	.	0.2143	0.2863	0.3668	0.702	0.3473	0.40615	.	.	.	.	.	.	.	.	.	.	.	.	.	.	.	.	.	.
chr1	119982785	.	G	C	.	PASS	NOTCH2	intronic	NM_001200001,NM_024408	.	.	.	ENST00000579475.7,ENST00000256646.6	1p12	.	.	.	.	.	.	.	.	.	.	.	.	.	.	.	.	.	.	.	.	.	.	.	.	.	.	.	.	.	.	.	.	.	.	.
chr1	120344663	.	C	T	.	PASS	.	intergenic	NM_004892,NM_001037501	dist=168142;dist=70364	.	.	.	1p12	.	Score=0.991183;Name=chr1:120907518	Score=9283;Name="245796:MER31-int(LTR)"	.	.	.	.	.	.	.	.	.	.	.	.	.	.	.	.	.	.	.	.	.	.	.	.	.	.	.	.	.	.	.	.
chr1	120625177	.	T	C	.	PASS	.	ncRNA_intronic	NR_144516,NR_144517	.	.	.	.	1p11.2	.	Score=0.996667;Name=chr1:120192772	Score=1505;Name="246302:L2a(LINE)"	.	.	.	.	.	.	.	.	.	.	.	.	.	.	.	.	.	.	.	.	.	.	.	.	.	.	.	.	.	.	.	.
chr1	120808143	.	A	T	.	PASS	.	intronic	NM_001351372	.	.	.	ENST00000611287.4,ENST00000620612.4,ENST00000617913.4,ENST00000615145.4,ENST00000611702.4,ENST00000615219.4,ENST00000619748.4	1p11.2	.	Score=0.990403;Name=chr1:149372304	.	.	.	.	.	.	.	.	.	.	.	.	.	.	.	.	.	.	.	.	.	.	.	.	.	.	.	.	.	.	.	.	.
chr1	121537956	.	G	T	.	PASS	EMBP1	ncRNA_intronic	NR_003955	.	.	.	.	1p11.2	.	.	Score=27375;Name="247919:L1HS(LINE)"	.	.	.	.	.	.	.	.	.	.	.	.	.	.	.	.	.	.	.	.	.	.	.	.	.	.	.	.	.	.	.	.
chr1	121695816	.	G	T	.	PASS	.	intergenic	NR_003955,NONE	dist=123928;dist=NONE	.	.	.	1p11.2	.	Score=0.961184;Name=chr1:121619373	Score=1255;Name="248012:ALR/Alpha(Satellite)"	.	.	.	.	.	.	.	.	.	.	.	.	.	.	.	.	.	.	.	.	.	.	.	.	.	.	.	.	.	.	.	.
chr1	121747332	.	T	G	.	PASS	.	intergenic	NR_003955,NONE	dist=175444;dist=NONE	.	.	.	1p11.1	.	.	Score=1315;Name="248014:ALR/Alpha(Satellite)"	.	.	.	.	.	.	.	.	.	.	.	.	.	.	.	.	.	.	.	.	.	.	.	.	.	.	.	.	.	.	.	.
chr1	121822818	.	T	C	.	PASS	.	intergenic	NR_003955,NONE	dist=250930;dist=NONE	.	.	.	1p11.1	.	.	Score=1179;Name="248027:ALR/Alpha(Satellite)"	.	.	.	.	.	.	.	.	.	.	.	.	.	.	.	.	.	.	.	.	.	.	.	.	.	.	.	.	.	.	.	.
chr1	121884777	.	C	A	.	PASS	.	intergenic	NR_003955,NONE	dist=312889;dist=NONE	.	.	.	1p11.1	.	.	Score=1237;Name="248051:ALR/Alpha(Satellite)"	.	.	.	.	.	.	.	.	.	.	.	.	.	.	.	.	.	.	.	.	.	.	.	.	.	.	.	.	.	.	.	.
chr1	121885431	.	C	G	.	PASS	.	intergenic	NR_003955,NONE	dist=313543;dist=NONE	.	.	.	1p11.1	.	.	Score=1237;Name="248051:ALR/Alpha(Satellite)"	.	.	.	.	.	.	.	.	.	.	.	.	.	.	.	.	.	.	.	.	.	.	.	.	.	.	.	.	.	.	.	.
chr1	121888288	.	T	A	.	PASS	.	intergenic	NR_003955,NONE	dist=316400;dist=NONE	.	.	.	1p11.1	.	.	Score=1237;Name="248051:ALR/Alpha(Satellite)"	.	.	.	.	.	.	.	.	.	.	.	.	.	.	.	.	.	.	.	.	.	.	.	.	.	.	.	.	.	.	.	.
chr1	121971921	.	A	T	.	PASS	.	intergenic	NR_003955,NONE	dist=400033;dist=NONE	.	.	.	1p11.1	.	.	Score=1173;Name="248075:ALR/Alpha(Satellite)"	.	.	.	.	.	.	.	.	.	.	.	.	.	.	.	.	.	.	.	.	.	.	.	.	.	.	.	.	.	.	.	.
chr1	122164226	.	T	A	.	PASS	.	intergenic	NR_003955,NONE	dist=592338;dist=NONE	.	.	.	1p11.1	.	Score=0.966033;Name=chr1:122170371	Score=1216;Name="248093:ALR/Alpha(Satellite)"	.	.	.	.	.	.	.	.	.	.	.	.	.	.	.	.	.	.	.	.	.	.	.	.	.	.	.	.	.	.	.	.
chr1	122211242	.	G	A	.	PASS	.	intergenic	NR_003955,NONE	dist=639354;dist=NONE	.	.	.	1p11.1	.	Score=0.966033;Name=chr1:122110312	Score=1302;Name="248096:ALR/Alpha(Satellite)"	.	.	.	.	.	.	.	.	.	.	.	.	.	.	.	.	.	.	.	.	.	.	.	.	.	.	.	.	.	.	.	.
chr1	122230133	.	G	T	.	PASS	.	intergenic	NR_003955,NONE	dist=658245;dist=NONE	.	.	.	1p11.1	.	.	Score=1262;Name="248100:ALR/Alpha(Satellite)"	.	.	.	.	.	.	.	.	.	.	.	.	.	.	.	.	.	.	.	.	.	.	.	.	.	.	.	.	.	.	.	.
chr1	122510208	.	A	C	.	PASS	.	intergenic	NR_003955,NONE	dist=938320;dist=NONE	.	.	.	1p11.1	.	.	Score=1363;Name="248104:ALR/Alpha(Satellite)"	.	.	.	.	.	.	.	.	.	.	.	.	.	.	.	.	.	.	.	.	.	.	.	.	.	.	.	.	.	.	.	.
chr1	122517253	.	T	C	.	PASS	.	intergenic	NR_003955,NONE	dist=945365;dist=NONE	.	.	.	1p11.1	.	.	Score=1363;Name="248104:ALR/Alpha(Satellite)"	.	.	.	.	.	.	.	.	.	.	.	.	.	.	.	.	.	.	.	.	.	.	.	.	.	.	.	.	.	.	.	.
chr1	122517269	.	G	C	.	PASS	.	intergenic	NR_003955,NONE	dist=945381;dist=NONE	.	.	.	1p11.1	.	.	Score=1363;Name="248104:ALR/Alpha(Satellite)"	.	.	.	.	.	.	.	.	.	.	.	.	.	.	.	.	.	.	.	.	.	.	.	.	.	.	.	.	.	.	.	.
chr1	122517419	.	C	T	.	PASS	.	intergenic	NR_003955,NONE	dist=945531;dist=NONE	.	.	.	1p11.1	.	.	Score=1363;Name="248104:ALR/Alpha(Satellite)"	.	.	.	.	.	.	.	.	.	.	.	.	.	.	.	.	.	.	.	.	.	.	.	.	.	.	.	.	.	.	.	.
chr1	122530757	.	T	C	.	PASS	.	intergenic	NR_003955,NONE	dist=958869;dist=NONE	.	.	.	1p11.1	.	.	Score=1363;Name="248104:ALR/Alpha(Satellite)"	.	.	.	.	.	.	.	.	.	.	.	.	.	.	.	.	.	.	.	.	.	.	.	.	.	.	.	.	.	.	.	.
chr1	122536204	.	G	C	.	PASS	.	intergenic	NR_003955,NONE	dist=964316;dist=NONE	.	.	.	1p11.1	.	.	Score=1363;Name="248104:ALR/Alpha(Satellite)"	.	.	.	.	.	.	.	.	.	.	.	.	.	.	.	.	.	.	.	.	.	.	.	.	.	.	.	.	.	.	.	.
chr1	122548926	.	C	T	.	PASS	.	intergenic	NR_003955,NONE	dist=977038;dist=NONE	.	.	.	1p11.1	.	.	Score=1363;Name="248104:ALR/Alpha(Satellite)"	.	.	.	.	.	.	.	.	.	.	.	.	.	.	.	.	.	.	.	.	.	.	.	.	.	.	.	.	.	.	.	.
chr1	122561037	.	G	A	.	PASS	.	intergenic	NR_003955,NONE	dist=989149;dist=NONE	.	.	.	1p11.1	.	.	Score=1363;Name="248104:ALR/Alpha(Satellite)"	.	.	.	.	.	.	.	.	.	.	.	.	.	.	.	.	.	.	.	.	.	.	.	.	.	.	.	.	.	.	.	.
chr1	122581591	.	C	T	.	PASS	.	intergenic	NR_003955,NONE	dist=1009703;dist=NONE	.	.	.	1p11.1	.	.	Score=1363;Name="248104:ALR/Alpha(Satellite)"	.	.	.	.	.	.	.	.	.	.	.	.	.	.	.	.	.	.	.	.	.	.	.	.	.	.	.	.	.	.	.	.
chr1	122588241	.	C	T	.	PASS	.	intergenic	NR_003955,NONE	dist=1016353;dist=NONE	.	.	.	1p11.1	.	.	Score=1363;Name="248104:ALR/Alpha(Satellite)"	.	.	.	.	.	.	.	.	.	.	.	.	.	.	.	.	.	.	.	.	.	.	.	.	.	.	.	.	.	.	.	.
chr1	122618603	.	G	A	.	PASS	.	intergenic	NR_003955,NONE	dist=1046715;dist=NONE	.	.	.	1p11.1	.	.	Score=1363;Name="248104:ALR/Alpha(Satellite)"	.	.	.	.	.	.	.	.	.	.	.	.	.	.	.	.	.	.	.	.	.	.	.	.	.	.	.	.	.	.	.	.
chr1	122622215	.	G	A	.	PASS	.	intergenic	NR_003955,NONE	dist=1050327;dist=NONE	.	.	.	1p11.1	.	.	Score=1363;Name="248104:ALR/Alpha(Satellite)"	.	.	.	.	.	.	.	.	.	.	.	.	.	.	.	.	.	.	.	.	.	.	.	.	.	.	.	.	.	.	.	.
chr1	122640460	.	C	G	.	PASS	.	intergenic	NR_003955,NONE	dist=1068572;dist=NONE	.	.	.	1p11.1	.	.	Score=1363;Name="248104:ALR/Alpha(Satellite)"	.	.	.	.	.	.	.	.	.	.	.	.	.	.	.	.	.	.	.	.	.	.	.	.	.	.	.	.	.	.	.	.
chr1	122663511	.	T	C	.	PASS	.	intergenic	NR_003955,NONE	dist=1091623;dist=NONE	.	.	.	1p11.1	.	.	Score=1363;Name="248104:ALR/Alpha(Satellite)"	.	.	.	.	.	.	.	.	.	.	.	.	.	.	.	.	.	.	.	.	.	.	.	.	.	.	.	.	.	.	.	.
chr1	122773983	.	G	C	.	PASS	.	intergenic	NR_003955,NONE	dist=1202095;dist=NONE	.	.	.	1p11.1	.	.	Score=1363;Name="248104:ALR/Alpha(Satellite)"	.	.	.	.	.	.	.	.	.	.	.	.	.	.	.	.	.	.	.	.	.	.	.	.	.	.	.	.	.	.	.	.
chr1	122782487	.	T	C	.	PASS	.	intergenic	NR_003955,NONE	dist=1210599;dist=NONE	.	.	.	1p11.1	.	.	Score=1363;Name="248104:ALR/Alpha(Satellite)"	.	.	.	.	.	.	.	.	.	.	.	.	.	.	.	.	.	.	.	.	.	.	.	.	.	.	.	.	.	.	.	.
chr1	122824400	.	G	C	.	PASS	.	intergenic	NR_003955,NONE	dist=1252512;dist=NONE	.	.	.	1p11.1	.	.	Score=1363;Name="248104:ALR/Alpha(Satellite)"	.	.	.	.	.	.	.	.	.	.	.	.	.	.	.	.	.	.	.	.	.	.	.	.	.	.	.	.	.	.	.	.
chr1	122824410	.	A	C	.	PASS	.	intergenic	NR_003955,NONE	dist=1252522;dist=NONE	.	.	.	1p11.1	.	.	Score=1363;Name="248104:ALR/Alpha(Satellite)"	.	.	.	.	.	.	.	.	.	.	.	.	.	.	.	.	.	.	.	.	.	.	.	.	.	.	.	.	.	.	.	.
chr1	122847485	.	T	A	.	PASS	.	intergenic	NR_003955,NONE	dist=1275597;dist=NONE	.	.	.	1p11.1	.	.	Score=1363;Name="248104:ALR/Alpha(Satellite)"	.	.	.	.	.	.	.	.	.	.	.	.	.	.	.	.	.	.	.	.	.	.	.	.	.	.	.	.	.	.	.	.
chr1	122847487	.	G	A	.	PASS	.	intergenic	NR_003955,NONE	dist=1275599;dist=NONE	.	.	.	1p11.1	.	.	Score=1363;Name="248104:ALR/Alpha(Satellite)"	.	.	.	.	.	.	.	.	.	.	.	.	.	.	.	.	.	.	.	.	.	.	.	.	.	.	.	.	.	.	.	.
chr1	122850086	.	G	T	.	PASS	.	intergenic	NR_003955,NONE	dist=1278198;dist=NONE	.	.	.	1p11.1	.	.	Score=1363;Name="248104:ALR/Alpha(Satellite)"	.	.	.	.	.	.	.	.	.	.	.	.	.	.	.	.	.	.	.	.	.	.	.	.	.	.	.	.	.	.	.	.
chr1	122852833	.	G	A	.	PASS	.	intergenic	NR_003955,NONE	dist=1280945;dist=NONE	.	.	.	1p11.1	.	.	Score=1363;Name="248104:ALR/Alpha(Satellite)"	.	.	.	.	.	.	.	.	.	.	.	.	.	.	.	.	.	.	.	.	.	.	.	.	.	.	.	.	.	.	.	.
chr1	122861536	.	G	A	.	PASS	.	intergenic	NR_003955,NONE	dist=1289648;dist=NONE	.	.	.	1p11.1	.	.	Score=1363;Name="248104:ALR/Alpha(Satellite)"	.	.	.	.	.	.	.	.	.	.	.	.	.	.	.	.	.	.	.	.	.	.	.	.	.	.	.	.	.	.	.	.
chr1	122867333	.	G	A	.	PASS	.	intergenic	NR_003955,NONE	dist=1295445;dist=NONE	.	.	.	1p11.1	.	.	Score=1363;Name="248104:ALR/Alpha(Satellite)"	.	.	.	.	.	.	.	.	.	.	.	.	.	.	.	.	.	.	.	.	.	.	.	.	.	.	.	.	.	.	.	.
chr1	122867837	.	T	A	.	PASS	.	intergenic	NR_003955,NONE	dist=1295949;dist=NONE	.	.	.	1p11.1	.	.	Score=1363;Name="248104:ALR/Alpha(Satellite)"	.	.	.	.	.	.	.	.	.	.	.	.	.	.	.	.	.	.	.	.	.	.	.	.	.	.	.	.	.	.	.	.
chr1	122870361	.	C	G	.	PASS	.	intergenic	NR_003955,NONE	dist=1298473;dist=NONE	.	.	.	1p11.1	.	.	Score=1363;Name="248104:ALR/Alpha(Satellite)"	.	.	.	.	.	.	.	.	.	.	.	.	.	.	.	.	.	.	.	.	.	.	.	.	.	.	.	.	.	.	.	.
chr1	122940218	.	T	G	.	PASS	.	intergenic	NR_003955,NONE	dist=1368330;dist=NONE	.	.	.	1p11.1	.	.	Score=1363;Name="248104:ALR/Alpha(Satellite)"	.	.	.	.	.	.	.	.	.	.	.	.	.	.	.	.	.	.	.	.	.	.	.	.	.	.	.	.	.	.	.	.
chr1	122960018	.	C	A	.	PASS	.	intergenic	NR_003955,NONE	dist=1388130;dist=NONE	.	.	.	1p11.1	.	.	Score=1363;Name="248104:ALR/Alpha(Satellite)"	.	.	.	.	.	.	.	.	.	.	.	.	.	.	.	.	.	.	.	.	.	.	.	.	.	.	.	.	.	.	.	.
chr1	122964576	.	T	G	.	PASS	.	intergenic	NR_003955,NONE	dist=1392688;dist=NONE	.	.	.	1p11.1	.	.	Score=1363;Name="248104:ALR/Alpha(Satellite)"	.	.	.	.	.	.	.	.	.	.	.	.	.	.	.	.	.	.	.	.	.	.	.	.	.	.	.	.	.	.	.	.
chr1	122981964	.	T	A	.	PASS	.	intergenic	NR_003955,NONE	dist=1410076;dist=NONE	.	.	.	1p11.1	.	.	Score=1363;Name="248104:ALR/Alpha(Satellite)"	.	.	.	.	.	.	.	.	.	.	.	.	.	.	.	.	.	.	.	.	.	.	.	.	.	.	.	.	.	.	.	.
chr1	122989977	.	T	C	.	PASS	.	intergenic	NR_003955,NONE	dist=1418089;dist=NONE	.	.	.	1p11.1	.	.	Score=1363;Name="248104:ALR/Alpha(Satellite)"	.	.	.	.	.	.	.	.	.	.	.	.	.	.	.	.	.	.	.	.	.	.	.	.	.	.	.	.	.	.	.	.
chr1	122999032	.	T	C	.	PASS	.	intergenic	NR_003955,NONE	dist=1427144;dist=NONE	.	.	.	1p11.1	.	.	Score=1363;Name="248104:ALR/Alpha(Satellite)"	.	.	.	.	.	.	.	.	.	.	.	.	.	.	.	.	.	.	.	.	.	.	.	.	.	.	.	.	.	.	.	.
chr1	123023752	.	A	G	.	PASS	.	intergenic	NR_003955,NONE	dist=1451864;dist=NONE	.	.	.	1p11.1	.	.	Score=1366;Name="248105:ALR/Alpha(Satellite)"	.	.	.	.	.	.	.	.	.	.	.	.	.	.	.	.	.	.	.	.	.	.	.	.	.	.	.	.	.	.	.	.
chr1	123060105	.	A	G	.	PASS	.	intergenic	NR_003955,NONE	dist=1488217;dist=NONE	.	.	.	1p11.1	.	.	Score=1366;Name="248105:ALR/Alpha(Satellite)"	.	.	.	.	.	.	.	.	.	.	.	.	.	.	.	.	.	.	.	.	.	.	.	.	.	.	.	.	.	.	.	.
chr1	123064838	.	A	G	.	PASS	.	intergenic	NR_003955,NONE	dist=1492950;dist=NONE	.	.	.	1p11.1	.	.	Score=1366;Name="248105:ALR/Alpha(Satellite)"	.	.	.	.	.	.	.	.	.	.	.	.	.	.	.	.	.	.	.	.	.	.	.	.	.	.	.	.	.	.	.	.
chr1	123071403	.	T	G	.	PASS	.	intergenic	NR_003955,NONE	dist=1499515;dist=NONE	.	.	.	1p11.1	.	.	Score=1366;Name="248105:ALR/Alpha(Satellite)"	.	.	.	.	.	.	.	.	.	.	.	.	.	.	.	.	.	.	.	.	.	.	.	.	.	.	.	.	.	.	.	.
chr1	123090978	.	G	A	.	PASS	.	intergenic	NR_003955,NONE	dist=1519090;dist=NONE	.	.	.	1p11.1	.	.	Score=1366;Name="248105:ALR/Alpha(Satellite)"	.	.	.	.	.	.	.	.	.	.	.	.	.	.	.	.	.	.	.	.	.	.	.	.	.	.	.	.	.	.	.	.
chr1	123099861	.	T	A	.	PASS	.	intergenic	NR_003955,NONE	dist=1527973;dist=NONE	.	.	.	1p11.1	.	.	Score=1366;Name="248105:ALR/Alpha(Satellite)"	.	.	.	.	.	.	.	.	.	.	.	.	.	.	.	.	.	.	.	.	.	.	.	.	.	.	.	.	.	.	.	.
chr1	123104920	.	A	G	.	PASS	.	intergenic	NR_003955,NONE	dist=1533032;dist=NONE	.	.	.	1p11.1	.	.	Score=1366;Name="248105:ALR/Alpha(Satellite)"	.	.	.	.	.	.	.	.	.	.	.	.	.	.	.	.	.	.	.	.	.	.	.	.	.	.	.	.	.	.	.	.
chr1	123130973	.	T	A	.	PASS	.	intergenic	NR_003955,NONE	dist=1559085;dist=NONE	.	.	.	1p11.1	.	.	Score=1366;Name="248105:ALR/Alpha(Satellite)"	.	.	.	.	.	.	.	.	.	.	.	.	.	.	.	.	.	.	.	.	.	.	.	.	.	.	.	.	.	.	.	.
chr1	123131002	.	G	T	.	PASS	.	intergenic	NR_003955,NONE	dist=1559114;dist=NONE	.	.	.	1p11.1	.	.	Score=1366;Name="248105:ALR/Alpha(Satellite)"	.	.	.	.	.	.	.	.	.	.	.	.	.	.	.	.	.	.	.	.	.	.	.	.	.	.	.	.	.	.	.	.
chr1	123140055	.	A	G	.	PASS	.	intergenic	NR_003955,NONE	dist=1568167;dist=NONE	.	.	.	1p11.1	.	.	Score=1366;Name="248105:ALR/Alpha(Satellite)"	.	.	.	.	.	.	.	.	.	.	.	.	.	.	.	.	.	.	.	.	.	.	.	.	.	.	.	.	.	.	.	.
chr1	123140276	.	T	A	.	PASS	.	intergenic	NR_003955,NONE	dist=1568388;dist=NONE	.	.	.	1p11.1	.	.	Score=1366;Name="248105:ALR/Alpha(Satellite)"	.	.	.	.	.	.	.	.	.	.	.	.	.	.	.	.	.	.	.	.	.	.	.	.	.	.	.	.	.	.	.	.
chr1	123148808	.	T	C	.	PASS	.	intergenic	NR_003955,NONE	dist=1576920;dist=NONE	.	.	.	1p11.1	.	.	Score=1366;Name="248105:ALR/Alpha(Satellite)"	.	.	.	.	.	.	.	.	.	.	.	.	.	.	.	.	.	.	.	.	.	.	.	.	.	.	.	.	.	.	.	.
chr1	123165920	.	G	C	.	PASS	.	intergenic	NR_003955,NONE	dist=1594032;dist=NONE	.	.	.	1p11.1	.	.	Score=1366;Name="248105:ALR/Alpha(Satellite)"	.	.	.	.	.	.	.	.	.	.	.	.	.	.	.	.	.	.	.	.	.	.	.	.	.	.	.	.	.	.	.	.
chr1	123175909	.	A	C	.	PASS	.	intergenic	NR_003955,NONE	dist=1604021;dist=NONE	.	.	.	1p11.1	.	.	Score=1366;Name="248105:ALR/Alpha(Satellite)"	.	.	.	.	.	.	.	.	.	.	.	.	.	.	.	.	.	.	.	.	.	.	.	.	.	.	.	.	.	.	.	.
chr1	123187945	.	T	A	.	PASS	.	intergenic	NR_003955,NONE	dist=1616057;dist=NONE	.	.	.	1p11.1	.	.	Score=1366;Name="248105:ALR/Alpha(Satellite)"	.	.	.	.	.	.	.	.	.	.	.	.	.	.	.	.	.	.	.	.	.	.	.	.	.	.	.	.	.	.	.	.
chr1	123211777	.	T	C	.	PASS	.	intergenic	NR_003955,NONE	dist=1639889;dist=NONE	.	.	.	1p11.1	.	.	Score=1366;Name="248105:ALR/Alpha(Satellite)"	.	.	.	.	.	.	.	.	.	.	.	.	.	.	.	.	.	.	.	.	.	.	.	.	.	.	.	.	.	.	.	.
chr1	123245389	.	C	G	.	PASS	.	intergenic	NR_003955,NONE	dist=1673501;dist=NONE	.	.	.	1p11.1	.	.	Score=1366;Name="248105:ALR/Alpha(Satellite)"	.	.	.	.	.	.	.	.	.	.	.	.	.	.	.	.	.	.	.	.	.	.	.	.	.	.	.	.	.	.	.	.
chr1	123268105	.	C	G	.	PASS	.	intergenic	NR_003955,NONE	dist=1696217;dist=NONE	.	.	.	1p11.1	.	.	Score=1366;Name="248105:ALR/Alpha(Satellite)"	.	.	.	.	.	.	.	.	.	.	.	.	.	.	.	.	.	.	.	.	.	.	.	.	.	.	.	.	.	.	.	.
chr1	123269596	.	T	A	.	PASS	.	intergenic	NR_003955,NONE	dist=1697708;dist=NONE	.	.	.	1p11.1	.	.	Score=1366;Name="248105:ALR/Alpha(Satellite)"	.	.	.	.	.	.	.	.	.	.	.	.	.	.	.	.	.	.	.	.	.	.	.	.	.	.	.	.	.	.	.	.
chr1	123289222	.	G	C	.	PASS	.	intergenic	NR_003955,NONE	dist=1717334;dist=NONE	.	.	.	1p11.1	.	.	Score=1366;Name="248105:ALR/Alpha(Satellite)"	.	.	.	.	.	.	.	.	.	.	.	.	.	.	.	.	.	.	.	.	.	.	.	.	.	.	.	.	.	.	.	.
chr1	123323258	.	T	C	.	PASS	.	intergenic	NR_003955,NONE	dist=1751370;dist=NONE	.	.	.	1p11.1	.	.	Score=1366;Name="248105:ALR/Alpha(Satellite)"	.	.	.	.	.	.	.	.	.	.	.	.	.	.	.	.	.	.	.	.	.	.	.	.	.	.	.	.	.	.	.	.
chr1	123330222	.	T	G	.	PASS	.	intergenic	NR_003955,NONE	dist=1758334;dist=NONE	.	.	.	1p11.1	.	.	Score=1366;Name="248105:ALR/Alpha(Satellite)"	.	.	.	.	.	.	.	.	.	.	.	.	.	.	.	.	.	.	.	.	.	.	.	.	.	.	.	.	.	.	.	.
chr1	123330285	.	A	T	.	PASS	.	intergenic	NR_003955,NONE	dist=1758397;dist=NONE	.	.	.	1p11.1	.	.	Score=1366;Name="248105:ALR/Alpha(Satellite)"	.	.	.	.	.	.	.	.	.	.	.	.	.	.	.	.	.	.	.	.	.	.	.	.	.	.	.	.	.	.	.	.
chr1	123332347	.	A	T	.	PASS	.	intergenic	NR_003955,NONE	dist=1760459;dist=NONE	.	.	.	1p11.1	.	.	Score=1366;Name="248105:ALR/Alpha(Satellite)"	.	.	.	.	.	.	.	.	.	.	.	.	.	.	.	.	.	.	.	.	.	.	.	.	.	.	.	.	.	.	.	.
chr1	123339977	.	C	T	.	PASS	.	intergenic	NR_003955,NONE	dist=1768089;dist=NONE	.	.	.	1p11.1	.	.	Score=1366;Name="248105:ALR/Alpha(Satellite)"	.	.	.	.	.	.	.	.	.	.	.	.	.	.	.	.	.	.	.	.	.	.	.	.	.	.	.	.	.	.	.	.
chr1	123354773	.	C	T	.	PASS	.	intergenic	NR_003955,NONE	dist=1782885;dist=NONE	.	.	.	1p11.1	.	.	Score=1366;Name="248105:ALR/Alpha(Satellite)"	.	.	.	.	.	.	.	.	.	.	.	.	.	.	.	.	.	.	.	.	.	.	.	.	.	.	.	.	.	.	.	.
chr1	123354930	.	T	C	.	PASS	.	intergenic	NR_003955,NONE	dist=1783042;dist=NONE	.	.	.	1p11.1	.	.	Score=1366;Name="248105:ALR/Alpha(Satellite)"	.	.	.	.	.	.	.	.	.	.	.	.	.	.	.	.	.	.	.	.	.	.	.	.	.	.	.	.	.	.	.	.
chr1	123354983	.	G	A	.	PASS	.	intergenic	NR_003955,NONE	dist=1783095;dist=NONE	.	.	.	1p11.1	.	.	Score=1366;Name="248105:ALR/Alpha(Satellite)"	.	.	.	.	.	.	.	.	.	.	.	.	.	.	.	.	.	.	.	.	.	.	.	.	.	.	.	.	.	.	.	.
chr1	123377885	.	A	G	.	PASS	.	intergenic	NR_003955,NONE	dist=1805997;dist=NONE	.	.	.	1p11.1	.	.	Score=1366;Name="248105:ALR/Alpha(Satellite)"	.	.	.	.	.	.	.	.	.	.	.	.	.	.	.	.	.	.	.	.	.	.	.	.	.	.	.	.	.	.	.	.
chr1	123386178	.	T	A	.	PASS	.	intergenic	NR_003955,NONE	dist=1814290;dist=NONE	.	.	.	1p11.1	.	.	Score=1366;Name="248105:ALR/Alpha(Satellite)"	.	.	.	.	.	.	.	.	.	.	.	.	.	.	.	.	.	.	.	.	.	.	.	.	.	.	.	.	.	.	.	.
chr1	123386319	.	G	C	.	PASS	.	intergenic	NR_003955,NONE	dist=1814431;dist=NONE	.	.	.	1p11.1	.	.	Score=1366;Name="248105:ALR/Alpha(Satellite)"	.	.	.	.	.	.	.	.	.	.	.	.	.	.	.	.	.	.	.	.	.	.	.	.	.	.	.	.	.	.	.	.
chr1	123387810	.	G	C	.	PASS	.	intergenic	NR_003955,NONE	dist=1815922;dist=NONE	.	.	.	1p11.1	.	.	Score=1366;Name="248105:ALR/Alpha(Satellite)"	.	.	.	.	.	.	.	.	.	.	.	.	.	.	.	.	.	.	.	.	.	.	.	.	.	.	.	.	.	.	.	.
chr1	123406501	.	G	T	.	PASS	.	intergenic	NR_003955,NONE	dist=1834613;dist=NONE	.	.	.	1q11	.	.	Score=1366;Name="248105:ALR/Alpha(Satellite)"	.	.	.	.	.	.	.	.	.	.	.	.	.	.	.	.	.	.	.	.	.	.	.	.	.	.	.	.	.	.	.	.
chr1	123425345	.	A	C	.	PASS	.	intergenic	NR_003955,NONE	dist=1853457;dist=NONE	.	.	.	1q11	.	.	Score=1366;Name="248105:ALR/Alpha(Satellite)"	.	.	.	.	.	.	.	.	.	.	.	.	.	.	.	.	.	.	.	.	.	.	.	.	.	.	.	.	.	.	.	.
chr1	123443485	.	C	T	.	PASS	.	intergenic	NR_003955,NONE	dist=1871597;dist=NONE	.	.	.	1q11	.	.	Score=1366;Name="248105:ALR/Alpha(Satellite)"	.	.	.	.	.	.	.	.	.	.	.	.	.	.	.	.	.	.	.	.	.	.	.	.	.	.	.	.	.	.	.	.
chr1	123454476	.	T	A	.	PASS	.	intergenic	NR_003955,NONE	dist=1882588;dist=NONE	.	.	.	1q11	.	.	Score=1366;Name="248105:ALR/Alpha(Satellite)"	.	.	.	.	.	.	.	.	.	.	.	.	.	.	.	.	.	.	.	.	.	.	.	.	.	.	.	.	.	.	.	.
chr1	123493300	.	C	G	.	PASS	.	intergenic	NR_003955,NONE	dist=1921412;dist=NONE	.	.	.	1q11	.	.	Score=1366;Name="248105:ALR/Alpha(Satellite)"	.	.	.	.	.	.	.	.	.	.	.	.	.	.	.	.	.	.	.	.	.	.	.	.	.	.	.	.	.	.	.	.
chr1	123506427	.	T	A	.	PASS	.	intergenic	NR_003955,NONE	dist=1934539;dist=NONE	.	.	.	1q11	.	.	Score=1356;Name="248106:ALR/Alpha(Satellite)"	.	.	.	.	.	.	.	.	.	.	.	.	.	.	.	.	.	.	.	.	.	.	.	.	.	.	.	.	.	.	.	.
chr1	123554977	.	T	C	.	PASS	.	intergenic	NR_003955,NONE	dist=1983089;dist=NONE	.	.	.	1q11	.	.	Score=1356;Name="248106:ALR/Alpha(Satellite)"	.	.	.	.	.	.	.	.	.	.	.	.	.	.	.	.	.	.	.	.	.	.	.	.	.	.	.	.	.	.	.	.
chr1	123583208	.	G	A	.	PASS	.	intergenic	NR_003955,NONE	dist=2011320;dist=NONE	.	.	.	1q11	.	.	Score=1356;Name="248106:ALR/Alpha(Satellite)"	.	.	.	.	.	.	.	.	.	.	.	.	.	.	.	.	.	.	.	.	.	.	.	.	.	.	.	.	.	.	.	.
chr1	123605488	.	A	T	.	PASS	.	intergenic	NONE,NONE	dist=NONE;dist=NONE	.	.	.	1q11	.	.	Score=1356;Name="248106:ALR/Alpha(Satellite)"	.	.	.	.	.	.	.	.	.	.	.	.	.	.	.	.	.	.	.	.	.	.	.	.	.	.	.	.	.	.	.	.
chr1	123612492	.	T	A	.	PASS	.	intergenic	NONE,NONE	dist=NONE;dist=NONE	.	.	.	1q11	.	.	Score=1356;Name="248106:ALR/Alpha(Satellite)"	.	.	.	.	.	.	.	.	.	.	.	.	.	.	.	.	.	.	.	.	.	.	.	.	.	.	.	.	.	.	.	.
chr1	123627986	.	G	A	.	PASS	.	intergenic	NONE,NONE	dist=NONE;dist=NONE	.	.	.	1q11	.	.	Score=1356;Name="248106:ALR/Alpha(Satellite)"	.	.	.	.	.	.	.	.	.	.	.	.	.	.	.	.	.	.	.	.	.	.	.	.	.	.	.	.	.	.	.	.
chr1	123629739	.	A	T	.	PASS	.	intergenic	NONE,NONE	dist=NONE;dist=NONE	.	.	.	1q11	.	.	Score=1356;Name="248106:ALR/Alpha(Satellite)"	.	.	.	.	.	.	.	.	.	.	.	.	.	.	.	.	.	.	.	.	.	.	.	.	.	.	.	.	.	.	.	.
chr1	123635424	.	T	G	.	PASS	.	intergenic	NONE,NONE	dist=NONE;dist=NONE	.	.	.	1q11	.	.	Score=1356;Name="248106:ALR/Alpha(Satellite)"	.	.	.	.	.	.	.	.	.	.	.	.	.	.	.	.	.	.	.	.	.	.	.	.	.	.	.	.	.	.	.	.
chr1	123635466	.	T	A	.	PASS	.	intergenic	NONE,NONE	dist=NONE;dist=NONE	.	.	.	1q11	.	.	Score=1356;Name="248106:ALR/Alpha(Satellite)"	.	.	.	.	.	.	.	.	.	.	.	.	.	.	.	.	.	.	.	.	.	.	.	.	.	.	.	.	.	.	.	.
chr1	123648259	.	A	T	.	PASS	.	intergenic	NONE,NONE	dist=NONE;dist=NONE	.	.	.	1q11	.	.	Score=1356;Name="248106:ALR/Alpha(Satellite)"	.	.	.	.	.	.	.	.	.	.	.	.	.	.	.	.	.	.	.	.	.	.	.	.	.	.	.	.	.	.	.	.
chr1	123669864	.	C	A	.	PASS	.	intergenic	NONE,NONE	dist=NONE;dist=NONE	.	.	.	1q11	.	.	Score=1356;Name="248106:ALR/Alpha(Satellite)"	.	.	.	.	.	.	.	.	.	.	.	.	.	.	.	.	.	.	.	.	.	.	.	.	.	.	.	.	.	.	.	.
chr1	123670058	.	A	T	.	PASS	.	intergenic	NONE,NONE	dist=NONE;dist=NONE	.	.	.	1q11	.	.	Score=1356;Name="248106:ALR/Alpha(Satellite)"	.	.	.	.	.	.	.	.	.	.	.	.	.	.	.	.	.	.	.	.	.	.	.	.	.	.	.	.	.	.	.	.
chr1	123670121	.	G	C	.	PASS	.	intergenic	NONE,NONE	dist=NONE;dist=NONE	.	.	.	1q11	.	.	Score=1356;Name="248106:ALR/Alpha(Satellite)"	.	.	.	.	.	.	.	.	.	.	.	.	.	.	.	.	.	.	.	.	.	.	.	.	.	.	.	.	.	.	.	.
chr1	123692691	.	G	T	.	PASS	.	intergenic	NONE,NONE	dist=NONE;dist=NONE	.	.	.	1q11	.	.	Score=1356;Name="248106:ALR/Alpha(Satellite)"	.	.	.	.	.	.	.	.	.	.	.	.	.	.	.	.	.	.	.	.	.	.	.	.	.	.	.	.	.	.	.	.
chr1	123692746	.	G	T	.	PASS	.	intergenic	NONE,NONE	dist=NONE;dist=NONE	.	.	.	1q11	.	.	Score=1356;Name="248106:ALR/Alpha(Satellite)"	.	.	.	.	.	.	.	.	.	.	.	.	.	.	.	.	.	.	.	.	.	.	.	.	.	.	.	.	.	.	.	.
chr1	123696035	.	T	G	.	PASS	.	intergenic	NONE,NONE	dist=NONE;dist=NONE	.	.	.	1q11	.	.	Score=1356;Name="248106:ALR/Alpha(Satellite)"	.	.	.	.	.	.	.	.	.	.	.	.	.	.	.	.	.	.	.	.	.	.	.	.	.	.	.	.	.	.	.	.
chr1	123708180	.	C	A	.	PASS	.	intergenic	NONE,NONE	dist=NONE;dist=NONE	.	.	.	1q11	.	.	Score=1356;Name="248106:ALR/Alpha(Satellite)"	.	.	.	.	.	.	.	.	.	.	.	.	.	.	.	.	.	.	.	.	.	.	.	.	.	.	.	.	.	.	.	.
chr1	123729482	.	C	T	.	PASS	.	intergenic	NONE,NONE	dist=NONE;dist=NONE	.	.	.	1q11	.	.	Score=1356;Name="248106:ALR/Alpha(Satellite)"	.	.	.	.	.	.	.	.	.	.	.	.	.	.	.	.	.	.	.	.	.	.	.	.	.	.	.	.	.	.	.	.
chr1	123730884	.	G	A	.	PASS	.	intergenic	NONE,NONE	dist=NONE;dist=NONE	.	.	.	1q11	.	.	Score=1356;Name="248106:ALR/Alpha(Satellite)"	.	.	.	.	.	.	.	.	.	.	.	.	.	.	.	.	.	.	.	.	.	.	.	.	.	.	.	.	.	.	.	.
chr1	123748217	.	C	T	.	PASS	.	intergenic	NONE,NONE	dist=NONE;dist=NONE	.	.	.	1q11	.	.	Score=1356;Name="248106:ALR/Alpha(Satellite)"	.	.	.	.	.	.	.	.	.	.	.	.	.	.	.	.	.	.	.	.	.	.	.	.	.	.	.	.	.	.	.	.
chr1	123753000	.	C	G	.	PASS	.	intergenic	NONE,NONE	dist=NONE;dist=NONE	.	.	.	1q11	.	.	Score=1356;Name="248106:ALR/Alpha(Satellite)"	.	.	.	.	.	.	.	.	.	.	.	.	.	.	.	.	.	.	.	.	.	.	.	.	.	.	.	.	.	.	.	.
chr1	123755936	.	A	G	.	PASS	.	intergenic	NONE,NONE	dist=NONE;dist=NONE	.	.	.	1q11	.	.	Score=1356;Name="248106:ALR/Alpha(Satellite)"	.	.	.	.	.	.	.	.	.	.	.	.	.	.	.	.	.	.	.	.	.	.	.	.	.	.	.	.	.	.	.	.
chr1	123759639	.	C	G	.	PASS	.	intergenic	NONE,NONE	dist=NONE;dist=NONE	.	.	.	1q11	.	.	Score=1356;Name="248106:ALR/Alpha(Satellite)"	.	.	.	.	.	.	.	.	.	.	.	.	.	.	.	.	.	.	.	.	.	.	.	.	.	.	.	.	.	.	.	.
chr1	123779899	.	G	T	.	PASS	.	intergenic	NONE,NONE	dist=NONE;dist=NONE	.	.	.	1q11	.	.	Score=1356;Name="248106:ALR/Alpha(Satellite)"	.	.	.	.	.	.	.	.	.	.	.	.	.	.	.	.	.	.	.	.	.	.	.	.	.	.	.	.	.	.	.	.
chr1	123789978	.	G	A	.	PASS	.	intergenic	NONE,NONE	dist=NONE;dist=NONE	.	.	.	1q11	.	.	Score=1356;Name="248106:ALR/Alpha(Satellite)"	.	.	.	.	.	.	.	.	.	.	.	.	.	.	.	.	.	.	.	.	.	.	.	.	.	.	.	.	.	.	.	.
chr1	123796168	.	A	T	.	PASS	.	intergenic	NONE,NONE	dist=NONE;dist=NONE	.	.	.	1q11	.	.	Score=1356;Name="248106:ALR/Alpha(Satellite)"	.	.	.	.	.	.	.	.	.	.	.	.	.	.	.	.	.	.	.	.	.	.	.	.	.	.	.	.	.	.	.	.
chr1	123818942	.	T	A	.	PASS	.	intergenic	NONE,NONE	dist=NONE;dist=NONE	.	.	.	1q11	.	.	Score=1356;Name="248106:ALR/Alpha(Satellite)"	.	.	.	.	.	.	.	.	.	.	.	.	.	.	.	.	.	.	.	.	.	.	.	.	.	.	.	.	.	.	.	.
chr1	123818956	.	G	T	.	PASS	.	intergenic	NONE,NONE	dist=NONE;dist=NONE	.	.	.	1q11	.	.	Score=1356;Name="248106:ALR/Alpha(Satellite)"	.	.	.	.	.	.	.	.	.	.	.	.	.	.	.	.	.	.	.	.	.	.	.	.	.	.	.	.	.	.	.	.
chr1	123831542	.	C	G	.	PASS	.	intergenic	NONE,NONE	dist=NONE;dist=NONE	.	.	.	1q11	.	.	Score=1356;Name="248106:ALR/Alpha(Satellite)"	.	.	.	.	.	.	.	.	.	.	.	.	.	.	.	.	.	.	.	.	.	.	.	.	.	.	.	.	.	.	.	.
chr1	123840296	.	A	G	.	PASS	.	intergenic	NONE,NONE	dist=NONE;dist=NONE	.	.	.	1q11	.	.	Score=1356;Name="248106:ALR/Alpha(Satellite)"	.	.	.	.	.	.	.	.	.	.	.	.	.	.	.	.	.	.	.	.	.	.	.	.	.	.	.	.	.	.	.	.
chr1	123860844	.	C	T	.	PASS	.	intergenic	NONE,NONE	dist=NONE;dist=NONE	.	.	.	1q11	.	.	Score=1356;Name="248106:ALR/Alpha(Satellite)"	.	.	.	.	.	.	.	.	.	.	.	.	.	.	.	.	.	.	.	.	.	.	.	.	.	.	.	.	.	.	.	.
chr1	123881806	.	A	G	.	PASS	.	intergenic	NONE,NONE	dist=NONE;dist=NONE	.	.	.	1q11	.	.	Score=1356;Name="248106:ALR/Alpha(Satellite)"	.	.	.	.	.	.	.	.	.	.	.	.	.	.	.	.	.	.	.	.	.	.	.	.	.	.	.	.	.	.	.	.
chr1	123896082	.	A	G	.	PASS	.	intergenic	NONE,NONE	dist=NONE;dist=NONE	.	.	.	1q11	.	.	Score=1356;Name="248106:ALR/Alpha(Satellite)"	.	.	.	.	.	.	.	.	.	.	.	.	.	.	.	.	.	.	.	.	.	.	.	.	.	.	.	.	.	.	.	.
chr1	123897765	.	G	A	.	PASS	.	intergenic	NONE,NONE	dist=NONE;dist=NONE	.	.	.	1q11	.	.	Score=1356;Name="248106:ALR/Alpha(Satellite)"	.	.	.	.	.	.	.	.	.	.	.	.	.	.	.	.	.	.	.	.	.	.	.	.	.	.	.	.	.	.	.	.
chr1	123900319	.	C	G	.	PASS	.	intergenic	NONE,NONE	dist=NONE;dist=NONE	.	.	.	1q11	.	.	Score=1356;Name="248106:ALR/Alpha(Satellite)"	.	.	.	.	.	.	.	.	.	.	.	.	.	.	.	.	.	.	.	.	.	.	.	.	.	.	.	.	.	.	.	.
chr1	123904297	.	T	A	.	PASS	.	intergenic	NONE,NONE	dist=NONE;dist=NONE	.	.	.	1q11	.	.	Score=1356;Name="248106:ALR/Alpha(Satellite)"	.	.	.	.	.	.	.	.	.	.	.	.	.	.	.	.	.	.	.	.	.	.	.	.	.	.	.	.	.	.	.	.
chr1	123907656	.	C	T	.	PASS	.	intergenic	NONE,NONE	dist=NONE;dist=NONE	.	.	.	1q11	.	.	Score=1356;Name="248106:ALR/Alpha(Satellite)"	.	.	.	.	.	.	.	.	.	.	.	.	.	.	.	.	.	.	.	.	.	.	.	.	.	.	.	.	.	.	.	.
chr1	123924954	.	C	A	.	PASS	.	intergenic	NONE,NONE	dist=NONE;dist=NONE	.	.	.	1q11	.	.	Score=1356;Name="248106:ALR/Alpha(Satellite)"	.	.	.	.	.	.	.	.	.	.	.	.	.	.	.	.	.	.	.	.	.	.	.	.	.	.	.	.	.	.	.	.
chr1	123933435	.	T	C	.	PASS	.	intergenic	NONE,NONE	dist=NONE;dist=NONE	.	.	.	1q11	.	.	Score=1356;Name="248106:ALR/Alpha(Satellite)"	.	.	.	.	.	.	.	.	.	.	.	.	.	.	.	.	.	.	.	.	.	.	.	.	.	.	.	.	.	.	.	.
chr1	123960246	.	T	C	.	PASS	.	intergenic	NONE,NONE	dist=NONE;dist=NONE	.	.	.	1q11	.	.	Score=1356;Name="248106:ALR/Alpha(Satellite)"	.	.	.	.	.	.	.	.	.	.	.	.	.	.	.	.	.	.	.	.	.	.	.	.	.	.	.	.	.	.	.	.
chr1	123968835	.	G	C	.	PASS	.	intergenic	NONE,NONE	dist=NONE;dist=NONE	.	.	.	1q11	.	.	Score=1356;Name="248106:ALR/Alpha(Satellite)"	.	.	.	.	.	.	.	.	.	.	.	.	.	.	.	.	.	.	.	.	.	.	.	.	.	.	.	.	.	.	.	.
chr1	123979813	.	T	A	.	PASS	.	intergenic	NONE,NONE	dist=NONE;dist=NONE	.	.	.	1q11	.	.	Score=1356;Name="248106:ALR/Alpha(Satellite)"	.	.	.	.	.	.	.	.	.	.	.	.	.	.	.	.	.	.	.	.	.	.	.	.	.	.	.	.	.	.	.	.
chr1	124020033	.	T	A	.	PASS	.	intergenic	NONE,NONE	dist=NONE;dist=NONE	.	.	.	1q11	.	.	Score=1356;Name="248107:ALR/Alpha(Satellite)"	.	.	.	.	.	.	.	.	.	.	.	.	.	.	.	.	.	.	.	.	.	.	.	.	.	.	.	.	.	.	.	.
chr1	124022135	.	T	A	.	PASS	.	intergenic	NONE,NONE	dist=NONE;dist=NONE	.	.	.	1q11	.	.	Score=1356;Name="248107:ALR/Alpha(Satellite)"	.	.	.	.	.	.	.	.	.	.	.	.	.	.	.	.	.	.	.	.	.	.	.	.	.	.	.	.	.	.	.	.
chr1	124073342	.	T	C	.	PASS	.	intergenic	NONE,NONE	dist=NONE;dist=NONE	.	.	.	1q11	.	.	Score=1356;Name="248107:ALR/Alpha(Satellite)"	.	.	.	.	.	.	.	.	.	.	.	.	.	.	.	.	.	.	.	.	.	.	.	.	.	.	.	.	.	.	.	.
chr1	124082764	.	G	A	.	PASS	.	intergenic	NONE,NONE	dist=NONE;dist=NONE	.	.	.	1q11	.	.	Score=1356;Name="248107:ALR/Alpha(Satellite)"	.	.	.	.	.	.	.	.	.	.	.	.	.	.	.	.	.	.	.	.	.	.	.	.	.	.	.	.	.	.	.	.
chr1	124106377	.	G	T	.	PASS	.	intergenic	NONE,NONE	dist=NONE;dist=NONE	.	.	.	1q11	.	.	Score=1356;Name="248107:ALR/Alpha(Satellite)"	.	.	.	.	.	.	.	.	.	.	.	.	.	.	.	.	.	.	.	.	.	.	.	.	.	.	.	.	.	.	.	.
chr1	124107569	.	A	T	.	PASS	.	intergenic	NONE,NONE	dist=NONE;dist=NONE	.	.	.	1q11	.	.	Score=1356;Name="248107:ALR/Alpha(Satellite)"	.	.	.	.	.	.	.	.	.	.	.	.	.	.	.	.	.	.	.	.	.	.	.	.	.	.	.	.	.	.	.	.
chr1	124119152	.	G	A	.	PASS	.	intergenic	NONE,NONE	dist=NONE;dist=NONE	.	.	.	1q11	.	.	Score=1356;Name="248107:ALR/Alpha(Satellite)"	.	.	.	.	.	.	.	.	.	.	.	.	.	.	.	.	.	.	.	.	.	.	.	.	.	.	.	.	.	.	.	.
chr1	124126164	.	T	C	.	PASS	.	intergenic	NONE,NONE	dist=NONE;dist=NONE	.	.	.	1q11	.	.	Score=1356;Name="248107:ALR/Alpha(Satellite)"	.	.	.	.	.	.	.	.	.	.	.	.	.	.	.	.	.	.	.	.	.	.	.	.	.	.	.	.	.	.	.	.
chr1	124134566	.	T	C	.	PASS	.	intergenic	NONE,NONE	dist=NONE;dist=NONE	.	.	.	1q11	.	.	Score=1356;Name="248107:ALR/Alpha(Satellite)"	.	.	.	.	.	.	.	.	.	.	.	.	.	.	.	.	.	.	.	.	.	.	.	.	.	.	.	.	.	.	.	.
chr1	124155643	.	A	T	.	PASS	.	intergenic	NONE,NONE	dist=NONE;dist=NONE	.	.	.	1q11	.	.	Score=1356;Name="248107:ALR/Alpha(Satellite)"	.	.	.	.	.	.	.	.	.	.	.	.	.	.	.	.	.	.	.	.	.	.	.	.	.	.	.	.	.	.	.	.
chr1	124172782	.	T	G	.	PASS	.	intergenic	NONE,NONE	dist=NONE;dist=NONE	.	.	.	1q11	.	.	Score=1356;Name="248107:ALR/Alpha(Satellite)"	.	.	.	.	.	.	.	.	.	.	.	.	.	.	.	.	.	.	.	.	.	.	.	.	.	.	.	.	.	.	.	.
chr1	124204270	.	A	C	.	PASS	.	intergenic	NONE,NONE	dist=NONE;dist=NONE	.	.	.	1q11	.	.	Score=1356;Name="248107:ALR/Alpha(Satellite)"	.	.	.	.	.	.	.	.	.	.	.	.	.	.	.	.	.	.	.	.	.	.	.	.	.	.	.	.	.	.	.	.
chr1	124228594	.	C	T	.	PASS	.	intergenic	NONE,NONE	dist=NONE;dist=NONE	.	.	.	1q11	.	.	Score=1356;Name="248107:ALR/Alpha(Satellite)"	.	.	.	.	.	.	.	.	.	.	.	.	.	.	.	.	.	.	.	.	.	.	.	.	.	.	.	.	.	.	.	.
chr1	124240549	.	A	T	.	PASS	.	intergenic	NONE,NONE	dist=NONE;dist=NONE	.	.	.	1q11	.	.	Score=1356;Name="248107:ALR/Alpha(Satellite)"	.	.	.	.	.	.	.	.	.	.	.	.	.	.	.	.	.	.	.	.	.	.	.	.	.	.	.	.	.	.	.	.
chr1	124299262	.	A	T	.	PASS	.	intergenic	NONE,NONE	dist=NONE;dist=NONE	.	.	.	1q11	.	.	Score=1356;Name="248107:ALR/Alpha(Satellite)"	.	.	.	.	.	.	.	.	.	.	.	.	.	.	.	.	.	.	.	.	.	.	.	.	.	.	.	.	.	.	.	.
chr1	124363689	.	C	G	.	PASS	.	intergenic	NONE,NONE	dist=NONE;dist=NONE	.	.	.	1q11	.	.	Score=1356;Name="248107:ALR/Alpha(Satellite)"	.	.	.	.	.	.	.	.	.	.	.	.	.	.	.	.	.	.	.	.	.	.	.	.	.	.	.	.	.	.	.	.
chr1	124381855	.	A	G	.	PASS	.	intergenic	NONE,NONE	dist=NONE;dist=NONE	.	.	.	1q11	.	.	Score=1356;Name="248107:ALR/Alpha(Satellite)"	.	.	.	.	.	.	.	.	.	.	.	.	.	.	.	.	.	.	.	.	.	.	.	.	.	.	.	.	.	.	.	.
chr1	124382732	.	T	C	.	PASS	.	intergenic	NONE,NONE	dist=NONE;dist=NONE	.	.	.	1q11	.	.	Score=1356;Name="248107:ALR/Alpha(Satellite)"	.	.	.	.	.	.	.	.	.	.	.	.	.	.	.	.	.	.	.	.	.	.	.	.	.	.	.	.	.	.	.	.
chr1	124404871	.	G	A	.	PASS	.	intergenic	NONE,NONE	dist=NONE;dist=NONE	.	.	.	1q11	.	.	Score=1356;Name="248107:ALR/Alpha(Satellite)"	.	.	.	.	.	.	.	.	.	.	.	.	.	.	.	.	.	.	.	.	.	.	.	.	.	.	.	.	.	.	.	.
chr1	124414150	.	T	C	.	PASS	.	intergenic	NONE,NONE	dist=NONE;dist=NONE	.	.	.	1q11	.	.	Score=1356;Name="248107:ALR/Alpha(Satellite)"	.	.	.	.	.	.	.	.	.	.	.	.	.	.	.	.	.	.	.	.	.	.	.	.	.	.	.	.	.	.	.	.
chr1	124431557	.	A	T	.	PASS	.	intergenic	NONE,NONE	dist=NONE;dist=NONE	.	.	.	1q11	.	.	Score=1356;Name="248107:ALR/Alpha(Satellite)"	.	.	.	.	.	.	.	.	.	.	.	.	.	.	.	.	.	.	.	.	.	.	.	.	.	.	.	.	.	.	.	.
chr1	124453737	.	G	C	.	PASS	.	intergenic	NONE,NONE	dist=NONE;dist=NONE	.	.	.	1q11	.	.	Score=1356;Name="248107:ALR/Alpha(Satellite)"	.	.	.	.	.	.	.	.	.	.	.	.	.	.	.	.	.	.	.	.	.	.	.	.	.	.	.	.	.	.	.	.
chr1	124454235	.	C	T	.	PASS	.	intergenic	NONE,NONE	dist=NONE;dist=NONE	.	.	.	1q11	.	.	Score=1356;Name="248107:ALR/Alpha(Satellite)"	.	.	.	.	.	.	.	.	.	.	.	.	.	.	.	.	.	.	.	.	.	.	.	.	.	.	.	.	.	.	.	.
chr1	124455501	.	T	A	.	PASS	.	intergenic	NONE,NONE	dist=NONE;dist=NONE	.	.	.	1q11	.	.	Score=1356;Name="248107:ALR/Alpha(Satellite)"	.	.	.	.	.	.	.	.	.	.	.	.	.	.	.	.	.	.	.	.	.	.	.	.	.	.	.	.	.	.	.	.
chr1	124455545	.	A	G	.	PASS	.	intergenic	NONE,NONE	dist=NONE;dist=NONE	.	.	.	1q11	.	.	Score=1356;Name="248107:ALR/Alpha(Satellite)"	.	.	.	.	.	.	.	.	.	.	.	.	.	.	.	.	.	.	.	.	.	.	.	.	.	.	.	.	.	.	.	.
chr1	124464194	.	T	C	.	PASS	.	intergenic	NONE,NONE	dist=NONE;dist=NONE	.	.	.	1q11	.	.	Score=1356;Name="248107:ALR/Alpha(Satellite)"	.	.	.	.	.	.	.	.	.	.	.	.	.	.	.	.	.	.	.	.	.	.	.	.	.	.	.	.	.	.	.	.
chr1	124514412	.	G	A	.	PASS	.	intergenic	NONE,NONE	dist=NONE;dist=NONE	.	.	.	1q11	.	.	Score=1422;Name="248108:ALR/Alpha(Satellite)"	.	.	.	.	.	.	.	.	.	.	.	.	.	.	.	.	.	.	.	.	.	.	.	.	.	.	.	.	.	.	.	.
chr1	124514491	.	T	G	.	PASS	.	intergenic	NONE,NONE	dist=NONE;dist=NONE	.	.	.	1q11	.	.	Score=1422;Name="248108:ALR/Alpha(Satellite)"	.	.	.	.	.	.	.	.	.	.	.	.	.	.	.	.	.	.	.	.	.	.	.	.	.	.	.	.	.	.	.	.
chr1	124514969	.	C	T	.	PASS	.	intergenic	NONE,NONE	dist=NONE;dist=NONE	.	.	.	1q11	.	.	Score=1422;Name="248108:ALR/Alpha(Satellite)"	.	.	.	.	.	.	.	.	.	.	.	.	.	.	.	.	.	.	.	.	.	.	.	.	.	.	.	.	.	.	.	.
chr1	124527897	.	A	G	.	PASS	.	intergenic	NONE,NONE	dist=NONE;dist=NONE	.	.	.	1q11	.	.	Score=1422;Name="248108:ALR/Alpha(Satellite)"	.	.	.	.	.	.	.	.	.	.	.	.	.	.	.	.	.	.	.	.	.	.	.	.	.	.	.	.	.	.	.	.
chr1	124534103	.	G	C	.	PASS	.	intergenic	NONE,NONE	dist=NONE;dist=NONE	.	.	.	1q11	.	.	Score=1422;Name="248108:ALR/Alpha(Satellite)"	.	.	.	.	.	.	.	.	.	.	.	.	.	.	.	.	.	.	.	.	.	.	.	.	.	.	.	.	.	.	.	.
chr1	124534681	.	G	C	.	PASS	.	intergenic	NONE,NONE	dist=NONE;dist=NONE	.	.	.	1q11	.	.	Score=1422;Name="248108:ALR/Alpha(Satellite)"	.	.	.	.	.	.	.	.	.	.	.	.	.	.	.	.	.	.	.	.	.	.	.	.	.	.	.	.	.	.	.	.
chr1	124569210	.	G	T	.	PASS	.	intergenic	NONE,NONE	dist=NONE;dist=NONE	.	.	.	1q11	.	.	Score=1422;Name="248108:ALR/Alpha(Satellite)"	.	.	.	.	.	.	.	.	.	.	.	.	.	.	.	.	.	.	.	.	.	.	.	.	.	.	.	.	.	.	.	.
chr1	124583415	.	T	G	.	PASS	.	intergenic	NONE,NONE	dist=NONE;dist=NONE	.	.	.	1q11	.	.	Score=1422;Name="248108:ALR/Alpha(Satellite)"	.	.	.	.	.	.	.	.	.	.	.	.	.	.	.	.	.	.	.	.	.	.	.	.	.	.	.	.	.	.	.	.
chr1	124589817	.	G	C	.	PASS	.	intergenic	NONE,NONE	dist=NONE;dist=NONE	.	.	.	1q11	.	.	Score=1422;Name="248108:ALR/Alpha(Satellite)"	.	.	.	.	.	.	.	.	.	.	.	.	.	.	.	.	.	.	.	.	.	.	.	.	.	.	.	.	.	.	.	.
chr1	124613961	.	A	G	.	PASS	.	intergenic	NONE,NONE	dist=NONE;dist=NONE	.	.	.	1q11	.	.	Score=1422;Name="248108:ALR/Alpha(Satellite)"	.	.	.	.	.	.	.	.	.	.	.	.	.	.	.	.	.	.	.	.	.	.	.	.	.	.	.	.	.	.	.	.
chr1	124639058	.	A	T	.	PASS	.	intergenic	NONE,NONE	dist=NONE;dist=NONE	.	.	.	1q11	.	.	Score=1422;Name="248108:ALR/Alpha(Satellite)"	.	.	.	.	.	.	.	.	.	.	.	.	.	.	.	.	.	.	.	.	.	.	.	.	.	.	.	.	.	.	.	.
chr1	124644684	.	C	T	.	PASS	.	intergenic	NONE,NONE	dist=NONE;dist=NONE	.	.	.	1q11	.	.	Score=1422;Name="248108:ALR/Alpha(Satellite)"	.	.	.	.	.	.	.	.	.	.	.	.	.	.	.	.	.	.	.	.	.	.	.	.	.	.	.	.	.	.	.	.
chr1	124648616	.	T	C	.	PASS	.	intergenic	NONE,NONE	dist=NONE;dist=NONE	.	.	.	1q11	.	.	Score=1422;Name="248108:ALR/Alpha(Satellite)"	.	.	.	.	.	.	.	.	.	.	.	.	.	.	.	.	.	.	.	.	.	.	.	.	.	.	.	.	.	.	.	.
chr1	124655208	.	A	G	.	PASS	.	intergenic	NONE,NONE	dist=NONE;dist=NONE	.	.	.	1q11	.	.	Score=1422;Name="248108:ALR/Alpha(Satellite)"	.	.	.	.	.	.	.	.	.	.	.	.	.	.	.	.	.	.	.	.	.	.	.	.	.	.	.	.	.	.	.	.
chr1	124673728	.	A	T	.	PASS	.	intergenic	NONE,NONE	dist=NONE;dist=NONE	.	.	.	1q11	.	.	Score=1422;Name="248108:ALR/Alpha(Satellite)"	.	.	.	.	.	.	.	.	.	.	.	.	.	.	.	.	.	.	.	.	.	.	.	.	.	.	.	.	.	.	.	.
chr1	124707500	.	T	G	.	PASS	.	intergenic	NONE,NONE	dist=NONE;dist=NONE	.	.	.	1q11	.	.	Score=1422;Name="248108:ALR/Alpha(Satellite)"	.	.	.	.	.	.	.	.	.	.	.	.	.	.	.	.	.	.	.	.	.	.	.	.	.	.	.	.	.	.	.	.
chr1	124717596	.	A	T	.	PASS	.	intergenic	NONE,NONE	dist=NONE;dist=NONE	.	.	.	1q11	.	.	Score=1422;Name="248108:ALR/Alpha(Satellite)"	.	.	.	.	.	.	.	.	.	.	.	.	.	.	.	.	.	.	.	.	.	.	.	.	.	.	.	.	.	.	.	.
chr1	124741926	.	G	T	.	PASS	.	intergenic	NONE,NONE	dist=NONE;dist=NONE	.	.	.	1q11	.	.	Score=1422;Name="248108:ALR/Alpha(Satellite)"	.	.	.	.	.	.	.	.	.	.	.	.	.	.	.	.	.	.	.	.	.	.	.	.	.	.	.	.	.	.	.	.
chr1	124749984	.	T	C	.	PASS	.	intergenic	NONE,NONE	dist=NONE;dist=NONE	.	.	.	1q11	.	.	Score=1422;Name="248108:ALR/Alpha(Satellite)"	.	.	.	.	.	.	.	.	.	.	.	.	.	.	.	.	.	.	.	.	.	.	.	.	.	.	.	.	.	.	.	.
chr1	124751328	.	A	G	.	PASS	.	intergenic	NONE,NONE	dist=NONE;dist=NONE	.	.	.	1q11	.	.	Score=1422;Name="248108:ALR/Alpha(Satellite)"	.	.	.	.	.	.	.	.	.	.	.	.	.	.	.	.	.	.	.	.	.	.	.	.	.	.	.	.	.	.	.	.
chr1	124759227	.	C	T	.	PASS	.	intergenic	NONE,NONE	dist=NONE;dist=NONE	.	.	.	1q11	.	.	Score=1422;Name="248108:ALR/Alpha(Satellite)"	.	.	.	.	.	.	.	.	.	.	.	.	.	.	.	.	.	.	.	.	.	.	.	.	.	.	.	.	.	.	.	.
chr1	124776380	.	T	A	.	PASS	.	intergenic	NONE,NONE	dist=NONE;dist=NONE	.	.	.	1q11	.	.	Score=1422;Name="248108:ALR/Alpha(Satellite)"	.	.	.	.	.	.	.	.	.	.	.	.	.	.	.	.	.	.	.	.	.	.	.	.	.	.	.	.	.	.	.	.
chr1	124776390	.	A	C	.	PASS	.	intergenic	NONE,NONE	dist=NONE;dist=NONE	.	.	.	1q11	.	.	Score=1422;Name="248108:ALR/Alpha(Satellite)"	.	.	.	.	.	.	.	.	.	.	.	.	.	.	.	.	.	.	.	.	.	.	.	.	.	.	.	.	.	.	.	.
chr1	124804680	.	G	C	.	PASS	.	intergenic	NONE,NONE	dist=NONE;dist=NONE	.	.	.	1q11	.	.	Score=1201;Name="248109:ALR/Alpha(Satellite)"	.	.	.	.	.	.	.	.	.	.	.	.	.	.	.	.	.	.	.	.	.	.	.	.	.	.	.	.	.	.	.	.
chr1	124805878	.	A	C	.	PASS	.	intergenic	NONE,NONE	dist=NONE;dist=NONE	.	.	.	1q11	.	.	Score=1201;Name="248109:ALR/Alpha(Satellite)"	.	.	.	.	.	.	.	.	.	.	.	.	.	.	.	.	.	.	.	.	.	.	.	.	.	.	.	.	.	.	.	.
chr1	124818871	.	C	A	.	PASS	.	intergenic	NONE,NONE	dist=NONE;dist=NONE	.	.	.	1q11	.	.	Score=1201;Name="248109:ALR/Alpha(Satellite)"	.	.	.	.	.	.	.	.	.	.	.	.	.	.	.	.	.	.	.	.	.	.	.	.	.	.	.	.	.	.	.	.
chr1	124879451	.	T	C	.	PASS	.	intergenic	NONE,NONE	dist=NONE;dist=NONE	.	.	.	1q11	.	.	Score=1262;Name="248110:ALR/Alpha(Satellite)"	.	.	.	.	.	.	.	.	.	.	.	.	.	.	.	.	.	.	.	.	.	.	.	.	.	.	.	.	.	.	.	.
chr1	124906306	.	C	A	.	PASS	.	intergenic	NONE,NONE	dist=NONE;dist=NONE	.	.	.	1q11	.	.	Score=1262;Name="248110:ALR/Alpha(Satellite)"	.	.	.	.	.	.	.	.	.	.	.	.	.	.	.	.	.	.	.	.	.	.	.	.	.	.	.	.	.	.	.	.
chr1	124911021	.	G	T	.	PASS	.	intergenic	NONE,NONE	dist=NONE;dist=NONE	.	.	.	1q11	.	.	Score=1262;Name="248110:ALR/Alpha(Satellite)"	.	.	.	.	.	.	.	.	.	.	.	.	.	.	.	.	.	.	.	.	.	.	.	.	.	.	.	.	.	.	.	.
chr1	124919333	.	A	T	.	PASS	.	intergenic	NONE,NONE	dist=NONE;dist=NONE	.	.	.	1q11	.	.	Score=1262;Name="248110:ALR/Alpha(Satellite)"	.	.	.	.	.	.	.	.	.	.	.	.	.	.	.	.	.	.	.	.	.	.	.	.	.	.	.	.	.	.	.	.
chr1	125117393	.	C	T	.	PASS	.	intergenic	NONE,NONE	dist=NONE;dist=NONE	.	.	.	1q12	.	Score=0.968561;Name=chr16:32081722	Score=327;Name="248194:L1M5(LINE)"	.	.	.	.	.	.	.	.	.	.	.	.	.	.	.	.	.	.	.	.	.	.	.	.	.	.	.	.	.	.	.	.
chr1	125117669	.	A	T	.	PASS	.	intergenic	NONE,NONE	dist=NONE;dist=NONE	.	.	.	1q12	.	Score=0.968561;Name=chr16:32081722	Score=288;Name="248195:L1ME3A(LINE)"	.	.	.	.	.	.	.	.	.	.	.	.	.	.	.	.	.	.	.	.	.	.	.	.	.	.	.	.	.	.	.	.
chr1	143265092	.	G	C	.	PASS	.	intergenic	NONE,NR_027354	dist=NONE;dist=134879	.	.	.	1q21.1	.	Score=0.963376;Name=chr1:143200060	.	.	.	.	.	.	.	.	.	.	.	.	.	.	.	.	.	.	.	.	.	.	.	.	.	.	.	.	.	.	.	.	.
chr1	143577688	.	T	C	.	PASS	.	intergenic	NR_027355,NR_104078	dist=153004;dist=121768	.	.	.	1q21.1	.	Score=0.922111;Name=chr1:149006729	Score=23973;Name="248867:L1PA6(LINE)"	.	.	.	.	.	.	.	.	.	.	.	.	.	.	.	.	.	.	.	.	.	.	.	.	.	.	.	.	.	.	.	.
chr1	143638280	.	G	A	.	PASS	.	intergenic	NR_027355,NR_104078	dist=213596;dist=61176	.	.	.	1q21.1	.	Score=0.930041;Name=chr1:146932467	Score=5550;Name="248960:SVA_E(Retroposon)"	.	.	.	.	.	.	.	.	.	.	.	.	.	.	.	.	.	.	.	.	.	.	.	.	.	.	.	.	.	.	.	.
chr1	143638288	.	C	A	.	PASS	.	intergenic	NR_027355,NR_104078	dist=213604;dist=61168	.	.	.	1q21.1	.	Score=0.930041;Name=chr1:146932467	Score=5550;Name="248960:SVA_E(Retroposon)"	.	.	.	.	.	.	.	.	.	.	.	.	.	.	.	.	.	.	.	.	.	.	.	.	.	.	.	.	.	.	.	.
chr1	143663223	.	T	C	.	PASS	.	intergenic	NR_027355,NR_104078	dist=238539;dist=36233	.	.	.	1q21.1	.	Score=0.913798;Name=chr1:148278112	Score=2461;Name="249009:L1MEc(LINE)"	.	.	.	.	.	.	.	.	.	.	.	.	.	.	.	.	.	.	.	.	.	.	.	.	.	.	.	.	.	.	.	.
chr1	144101161	.	C	T	.	PASS	.	intergenic	NR_120535,NR_027354	dist=31457;dist=124409	.	.	.	1q21.1	.	Score=0.996291;Name=chr1:144825166	.	.	.	.	.	.	.	.	.	.	.	.	.	.	.	.	.	.	.	.	.	.	.	.	.	.	.	.	.	.	.	.	.
chr1	144431365	.	T	C	.	PASS	NBPF15	intronic	NM_001170755,NM_173638	.	.	.	ENST00000581897.6,ENST00000577412.5,ENST00000488031.6	1q21.1	.	Score=0.98411;Name=chr1:120449114	Score=10764;Name="250509:L1P2(LINE)"	.	.	.	.	.	.	.	.	.	.	.	.	.	.	.	.	.	.	.	.	.	.	.	.	.	.	.	.	.	.	.	.
chr1	145230228	.	T	C	.	PASS	.	intergenic	NR_111954,NM_001164261	dist=14157;dist=11187	.	.	.	1q21.1	.	Score=0.992065;Name=chr1:144572473	Score=788;Name="252054:AluSg4(SINE)"	.	.	.	.	.	.	.	.	.	.	.	.	.	.	.	.	.	.	.	.	.	.	.	.	.	.	.	.	.	.	.	.
chr1	145230457	.	A	C	.	PASS	.	intergenic	NR_111954,NM_001164261	dist=14386;dist=10958	.	.	.	1q21.1	.	Score=0.992065;Name=chr1:144572473	.	.	.	.	.	.	.	.	.	.	.	.	.	.	.	.	.	.	.	.	.	.	.	.	.	.	.	.	.	.	.	.	.
chr1	145309469	.	C	G	.	PASS	NBPF20	intronic	NM_001278267	.	.	.	ENST00000622803.4,ENST00000369373.9,ENST00000392971.6,ENST00000594479.7,ENST00000620821.1	1q21.1	.	Score=0.996861;Name=chr1:145350725	Score=57;Name="252182:(AC)n(Simple_repeat)"	.	.	.	.	.	.	.	.	.	.	.	.	.	.	.	.	.	.	.	.	.	.	.	.	.	.	.	.	.	.	.	.
chr1	145828412	.	T	G	.	PASS	POLR3C	intronic	NM_001303456,NM_006468	.	.	.	ENST00000369294.5,ENST00000334163.3	1q21.1	.	.	Score=365;Name="253132:L2c(LINE)"	.	.	.	.	.	.	.	.	.	.	.	.	.	.	.	.	.	.	.	.	.	.	.	.	.	.	.	.	.	.	.	.
chr1	146056342	.	C	G	.	PASS	LOC101928979	ncRNA_intronic	NR_125967,NR_125968	.	.	.	ENST00000611275.4	1q21.1	.	Score=0.978045;Name=chr1:146984320	.	.	.	.	.	.	.	.	.	.	.	.	.	.	.	.	.	.	.	.	.	.	.	.	.	.	.	.	.	.	.	.	.
chr1	146399260	.	T	G	.	PASS	.	intergenic	NR_004400,NR_103556	dist=22290;dist=87072	.	.	.	1q21.1	.	Score=0.989496;Name=chr1:144457971	Score=2067;Name="254256:AluSx1(SINE)"	.	.	.	.	.	.	.	.	.	.	.	.	.	.	.	.	.	.	.	.	.	.	.	.	.	.	.	.	.	.	.	.
chr1	146418616	.	C	A	.	PASS	.	intergenic	NR_004400,NR_103556	dist=41646;dist=67716	.	.	.	1q21.1	.	Score=0.99067;Name=chr1:149099866	Score=1689;Name="254300:L1MEc(LINE)"	.	.	.	.	.	.	.	.	.	.	.	.	.	.	.	.	.	.	.	.	.	.	.	.	.	.	.	.	.	.	.	.
chr1	146867026	.	G	C	.	PASS	.	intergenic	NR_103556,NM_001278141	dist=44992;dist=71519	.	.	.	1q21.1	.	Score=0.993476;Name=chr16:70811383	Score=10471;Name="255163:L1M4(LINE)"	.	.	.	.	.	.	.	.	.	.	.	.	.	.	.	.	.	.	.	.	.	.	.	.	.	.	.	.	.	.	.	.
chr1	146981256	.	G	C	.	PASS	NBPF12	intronic	NM_001278141	.	.	.	ENST00000617931.4,ENST00000613714.2,ENST00000617864.3,ENST00000579935.8,ENST00000611443.4,ENST00000439206.6,ENST00000617614.4,ENST00000617844.4	1q21.1	.	Score=0.978844;Name=chr1:148103790	Score=5439;Name="255377:L1PA4(LINE)"	.	.	.	.	.	.	.	.	.	.	.	.	.	.	.	.	.	.	.	.	.	.	.	.	.	.	.	.	.	.	.	.
chr1	146986415	.	T	G	.	PASS	NBPF12	exonic	NM_001278141	.	missense SNV	NBPF12:NM_001278141:exon27:c.T2955G:p.C985W	ENST00000611443.4,ENST00000439206.6,ENST00000617614.4,ENST00000617844.4,ENST00000617931.4,ENST00000613714.2,ENST00000617864.3,ENST00000579935.8	1q21.1	.	Score=0.994885;Name=chr1:146989566	.	.	.	.	.	.	.	.	.	.	.	.	.	.	.	.	.	.	.	.	.	.	.	.	.	.	.	.	.	.	.	.	.
chr1	147044991	.	G	T	.	PASS	.	intergenic	NR_024442,NR_121645	dist=1952;dist=39625	.	.	.	1q21.1	.	Score=0.953772;Name=chr1:148968012	.	.	.	.	.	.	.	.	.	.	.	.	.	.	.	.	.	.	.	.	.	.	.	.	.	.	.	.	.	.	.	.	.
chr1	147113516	.	C	T	.	PASS	NBPF13P	ncRNA_exonic	NR_103466	.	.	.	.	1q21.1	.	.	.	.	.	.	.	.	.	.	.	.	.	.	.	.	.	.	.	.	.	.	.	.	.	.	.	.	.	.	.	.	.	.	.
chr1	147180159	.	A	T	.	PASS	.	intronic	NM_001348451	.	.	.	ENST00000606856.1,ENST00000607149.1,ENST00000606757.1	1q21.1	.	.	.	.	.	.	.	.	.	.	.	.	.	.	.	.	.	.	.	.	.	.	.	.	.	.	.	.	.	.	.	.	.	.	.
chr1	147232666	.	T	G	.	PASS	.	intronic	NM_001348451	.	.	.	ENST00000606856.1	1q21.1	.	.	Score=7071;Name="255751:SVA_D(Retroposon)"	.	.	.	.	.	.	.	.	.	.	.	.	.	.	.	.	.	.	.	.	.	.	.	.	.	.	.	.	.	.	.	.
chr1	147517256	rs797039837	T	C	.	PASS	LINC00624	ncRNA_intronic	NR_038423	.	.	.	ENST00000621316.1,ENST00000619867.4	1q21.2	.	.	Score=342;Name="256218:MIRb(SINE)"	rs797039837	.	.	.	.	.	.	.	.	.	.	.	.	.	.	.	.	.	.	.	.	.	.	.	.	.	.	.	.	.	.	.
chr1	148010315	.	T	G	.	PASS	PDZK1P1	ncRNA_intronic	NR_111936	.	.	.	ENST00000401008.6	1q21.2	.	.	.	.	.	.	.	.	.	.	.	.	.	.	.	.	.	.	.	.	.	.	.	.	.	.	.	.	.	.	.	.	.	.	.
chr1	148127977	.	T	A	.	PASS	NBPF11	intronic	NM_001101663,NM_183372	.	.	.	ENST00000615281.4,ENST00000580077.5	1q21.2	.	Score=0.97318;Name=chr1:149058694	Score=896;Name="257374:L1ME2(LINE)"	.	.	.	.	.	.	.	.	.	.	.	.	.	.	.	.	.	.	.	.	.	.	.	.	.	.	.	.	.	.	.	.
chr1	148557253	.	A	G	.	PASS	NBPF14	intronic	NM_015383	.	.	.	ENST00000620240.1,ENST00000621070.4,ENST00000614329.4,ENST00000616120.4,ENST00000614999.4,ENST00000611826.4,ENST00000581201.5,ENST00000621066.4	1q21.2	.	Score=0.996949;Name=chr1:146081966	.	.	.	.	.	.	.	.	.	.	.	.	.	.	.	.	.	.	.	.	.	.	.	.	.	.	.	.	.	.	.	.	.
chr1	148829048	.	T	A	.	PASS	PDE4DIP	intronic	NM_001350521,NM_022359	.	.	.	ENST00000530472.5,ENST00000620605.4,ENST00000524974.5,ENST00000585156.5	1q21.2	.	Score=0.997406;Name=chr1:149194882	Score=46;Name="258711:(AC)n(Simple_repeat)"	.	.	.	.	.	.	.	.	.	.	.	.	.	.	.	.	.	.	.	.	.	.	.	.	.	.	.	.	.	.	.	.
chr1	148903159	rs58159184	C	T	.	PASS	PDE4DIP	intronic	NM_001002810,NM_001002812,NM_001195260,NM_001195261,NM_001198832,NM_001198834,NM_001350521,NM_001350522,NM_001350523,NM_014644,NM_022359	.	.	.	ENST00000524974.5,ENST00000369351.7,ENST00000620605.4,ENST00000530472.5,ENST00000369354.7,ENST00000369356.8,ENST00000369349.7,ENST00000618462.4,ENST00000585156.5,ENST00000369347.8,ENST00000464103.5	1q21.2	.	Score=0.997406;Name=chr1:149194882	Score=15571;Name="258848:L1PB1(LINE)"	rs58159184	.	.	.	.	.	.	.	.	.	.	.	.	.	.	.	.	.	.	.	.	.	.	.	.	.	.	.	.	.	.	.
chr1	149021674	.	G	A	.	PASS	PDE4DIP	intronic	NM_001198832,NM_001198834,NM_001350520,NM_001350521,NM_001350522,NM_001350523,NM_014644	.	.	.	ENST00000532137.1,ENST00000585156.5,ENST00000618462.4,ENST00000369354.7,ENST00000369356.8,ENST00000524974.5	1q21.2	.	Score=0.98869;Name=chr1:120460759	.	.	.	.	.	.	.	.	.	.	.	.	.	.	.	.	.	.	.	.	.	.	.	.	.	.	.	.	.	.	.	.	.
chr1	149054684	.	C	A	.	PASS	NBPF9	UTR3	NM_001037675,NM_001277444	NM_001037675:c.*972G>T;NM_001277444:c.*972G>T	.	.	ENST00000613969.4,ENST00000613595.4,ENST00000621074.4,ENST00000615421.4,ENST00000584027.8,ENST00000621645.4	1q21.2	.	Score=0.98869;Name=chr1:120460759	Score=561;Name="259080:L1MC4(LINE)"	.	.	.	.	.	.	.	.	.	.	.	.	.	.	.	.	.	.	.	.	.	.	.	.	.	.	.	.	.	.	.	.
chr1	149203276	rs148662694	C	T	.	PASS	.	intergenic	NM_001277444,NM_001351365	dist=120965;dist=272622	.	.	ENST00000611769.4	1q21.2	.	Score=0.997406;Name=chr1:148763714	Score=751;Name="259342:MER53(DNA)"	rs148662694	.	.	.	.	.	.	.	.	.	.	.	.	.	.	.	.	.	.	.	.	.	.	.	.	.	.	.	.	.	.	.
chr1	149301447	rs1613572	A	G	.	PASS	.	intergenic	NM_001277444,NM_001351365	dist=219136;dist=174451	.	.	.	1q21.2	.	Score=0.997406;Name=chr1:148763714	.	rs1613572	.	.	.	.	.	.	.	.	.	.	.	.	.	.	.	.	.	.	.	.	.	.	.	.	.	.	.	.	.	.	.
chr1	149627962	rs202181095	T	C	.	PASS	LINC00869	ncRNA_intronic	NR_111950,NR_111951,NR_111952,NR_111953	.	.	.	ENST00000610578.4,ENST00000621156.1	1q21.2	.	Score=0.990232;Name=chr1:145187963	Score=1605;Name="260069:AluJb(SINE)"	rs202181095	.	.	.	.	.	.	.	.	.	.	.	.	.	.	.	.	.	.	.	.	.	.	.	.	.	.	.	.	.	.	.
chr1	149645124	.	A	C	.	PASS	LINC00869	ncRNA_intronic	NR_111950,NR_111951,NR_111952,NR_111953	.	.	.	ENST00000430442.2,ENST00000621156.1,ENST00000610578.4	1q21.2	.	Score=0.987695;Name=chr1:143733607	Score=3004;Name="260140:MER51D(LTR)"	.	.	.	.	.	.	.	.	.	.	.	.	.	.	.	.	.	.	.	.	.	.	.	.	.	.	.	.	.	.	.	.
chr1	149733199	rs2319287	A	G	.	PASS	.	intergenic	NM_001348152,NM_001161334	dist=27482;dist=49490	.	.	ENST00000617878.1	1q21.2	.	Score=0.992976;Name=chr1:145129135	Score=2426;Name="260293:AluSx1(SINE)"	rs2319287	.	.	.	.	.	.	.	.	.	.	.	.	.	.	.	.	.	.	.	.	.	.	.	.	.	.	.	.	.	.	.
chr1	150364682	.	A	C	.	PASS	RPRD2	UTR5	NM_001297673,NM_001297674,NM_015203	NM_001297673:c.-33A>C;NM_001297674:c.-33A>C;NM_015203:c.-33A>C	.	.	ENST00000401000.8	1q21.2	.	.	.	.	.	.	.	.	.	.	.	.	.	.	.	.	.	.	.	.	.	.	.	.	.	.	.	.	.	.	.	.	.	.	.
chr1	150728464	.	A	C	.	PASS	.	intergenic	NM_001199829,NM_001199739	dist=7576;dist=1732	.	.	.	1q21.3	.	.	Score=6457;Name="262710:SVA_F(Retroposon)"	.	.	.	.	.	.	.	.	.	.	.	.	.	.	.	.	.	.	.	.	.	.	.	.	.	.	.	.	.	.	.	.
chr1	150911800	.	T	G	.	PASS	.	intergenic	NM_001350226,NM_001243491	dist=35032;dist=14539	.	.	.	1q21.3	.	.	.	.	.	.	.	.	.	.	.	.	.	.	.	.	.	.	.	.	.	.	.	.	.	.	.	.	.	.	.	.	.	.	.
chr1	151117694	.	A	C	.	PASS	GABPB2	intronic	NM_001323906,NM_001323907,NM_001323908,NM_001323909,NM_001323910,NM_001323911,NM_001323912,NM_001323913,NM_144618	.	.	.	ENST00000368918.7,ENST00000368916.1	1q21.3	.	.	Score=2157;Name="263725:AluSx1(SINE)"	.	.	.	.	.	.	.	.	.	.	.	.	.	.	.	.	.	.	.	.	.	.	.	.	.	.	.	.	.	.	.	.
chr1	152212878	.	A	G	.	PASS	HRNR	UTR3	NM_001009931	NM_001009931:c.*198T>C	.	.	ENST00000420707.5,ENST00000368801.2	1q21.3	.	.	.	.	.	.	.	.	.	.	.	.	.	.	.	.	.	.	.	.	.	.	.	.	.	.	.	.	.	.	.	.	.	.	.
chr1	152915473	rs1004023634	C	T	.	PASS	.	intergenic	NM_005547,NM_173080	dist=3587;dist=55180	.	.	.	1q21.3	.	.	Score=1978;Name="267091:L1M3f(LINE)"	rs1004023634	.	.	.	.	.	.	.	.	.	.	.	.	.	.	.	.	.	.	.	.	.	.	.	.	.	.	.	.	.	.	.
chr1	153039812	.	G	C	.	PASS	SPRR2D	UTR3	NM_006945	NM_006945:c.*316C>G	.	.	ENST00000368758.3,ENST00000360379.3	1q21.3	.	.	.	.	.	.	.	.	.	.	.	.	.	.	.	.	.	.	.	.	.	.	.	.	.	.	.	.	.	.	.	.	.	.	.
chr1	153120676	.	C	G	.	PASS	.	intergenic	NM_001014450,NR_003062	dist=7161;dist=19442	.	.	.	1q21.3	.	.	Score=4875;Name="267382:L1M4(LINE)"	.	.	.	.	.	.	.	.	.	.	.	.	.	.	.	.	.	.	.	.	.	.	.	.	.	.	.	.	.	.	.	.
chr1	153419020	.	A	C	.	PASS	S100A7A	intronic	NM_001319198,NM_176823	.	.	.	ENST00000329256.2,ENST00000368729.8,ENST00000368728.2	1q21.3	.	Score=0.926545;Name=chr1:153444663	.	.	.	.	.	.	.	.	.	.	.	.	.	.	.	.	.	.	.	.	.	.	.	.	.	.	.	.	.	.	.	.	.
chr1	153762838	.	A	C	.	PASS	INTS3	exonic	NM_001324475,NM_023015	.	missense SNV	INTS3:NM_023015:exon15:c.A1627C:p.N543H,INTS3:NM_001324475:exon16:c.A1627C:p.N543H	ENST00000435409.6,ENST00000318967.6,ENST00000512605.4	1q21.3	.	.	.	.	.	.	.	.	.	.	.	.	.	.	.	.	.	.	.	.	.	.	.	.	.	.	.	.	.	.	.	.	.	.	.
chr1	154365207	.	T	G	.	PASS	.	intergenic	NM_020452,NM_000565	dist=13903;dist=39986	.	.	.	1q21.3	.	.	Score=2075;Name="270221:AluSz(SINE)"	.	.	.	.	.	.	.	.	.	.	.	.	.	.	.	.	.	.	.	.	.	.	.	.	.	.	.	.	.	.	.	.
chr1	154604403	.	A	C	.	PASS	ADAR	intronic	NM_001025107,NM_001111,NM_001193495,NM_015840,NM_015841	.	.	.	ENST00000368474.8,ENST00000368471.7	1q21.3	.	.	.	.	.	.	.	.	.	.	.	.	.	.	.	.	.	.	.	.	.	.	.	.	.	.	.	.	.	.	.	.	.	.	.
chr1	154946073	.	T	G	.	PASS	PBXIP1	exonic	NM_001317734,NM_001317735,NM_020524	.	missense SNV	PBXIP1:NM_001317735:exon7:c.A1136C:p.K379T,PBXIP1:NM_001317734:exon9:c.A1514C:p.K505T,PBXIP1:NM_020524:exon10:c.A1601C:p.K534T	ENST00000368463.7,ENST00000368465.5	1q21.3	.	.	.	.	.	.	.	.	.	.	.	.	.	.	.	.	.	.	.	.	.	.	.	.	.	.	.	.	.	.	.	.	.	.	.
chr1	155031393	.	A	C	.	PASS	DCST2	intronic	NM_144622	.	.	.	ENST00000368424.3	1q21.3	.	.	Score=11;Name="271722:(CCCACC)n(Simple_repeat)"	.	.	.	.	.	.	.	.	.	.	.	.	.	.	.	.	.	.	.	.	.	.	.	.	.	.	.	.	.	.	.	.
chr1	155562942	.	A	C	.	PASS	ASH1L-AS1	ncRNA_exonic	NR_027023	.	.	.	ENST00000456633.1	1q22	.	Score=0.945187;Name=chr1:155685013	.	.	.	.	.	.	.	.	.	.	.	.	.	.	.	.	.	.	.	.	.	.	.	.	.	.	.	.	.	.	.	.	.
chr1	156339219	rs200153582	G	A	.	PASS	TSACC	intronic	NM_001304817,NM_001304818,NM_001304819,NM_001304820,NM_001304821,NM_001304822,NM_001304823,NM_001304824,NM_001304825,NM_001304826,NM_144627	.	.	.	ENST00000481479.5,ENST00000368253.6,ENST00000368252.5,ENST00000466306.5,ENST00000470342.5,ENST00000368251.1,ENST00000368255.7,ENST00000368254.5	1q22	.	.	Score=2441;Name="274956:AluSx(SINE)"	rs200153582	.	.	.	.	.	.	.	.	.	.	.	.	.	.	.	.	.	.	.	.	.	.	.	.	.	.	.	.	.	.	.
chr1	156910473	.	A	C	.	PASS	PEAR1	intronic	NM_001080471	.	.	.	ENST00000292357.7,ENST00000338302.7	1q23.1	.	.	Score=11;Name="276111:(CCCCTCC)n(Simple_repeat)"	.	.	.	.	.	.	.	.	.	.	.	.	.	.	.	.	.	.	.	.	.	.	.	.	.	.	.	.	.	.	.	.
chr1	157072139	.	G	A	.	PASS	.	intergenic	NM_014784,NM_001004341	dist=26769;dist=19904	.	.	.	1q23.1	.	.	.	.	.	.	.	.	.	.	.	.	.	.	.	.	.	.	.	.	.	.	.	.	.	.	.	.	.	.	.	.	.	.	.
chr1	157074269	.	G	C	.	PASS	.	intergenic	NM_014784,NM_001004341	dist=28899;dist=17774	.	.	.	1q23.1	.	Score=0.946023;Name=chr8:61578141	.	.	.	.	.	.	.	.	.	.	.	.	.	.	.	.	.	.	.	.	.	.	.	.	.	.	.	.	.	.	.	.	.
chr1	157188405	.	T	G	.	PASS	.	intergenic	NM_001145312,NM_001195388	dist=49814;dist=324972	.	.	.	1q23.1	.	.	Score=596;Name="276615:HAL1(LINE)"	.	.	.	.	.	.	.	.	.	.	.	.	.	.	.	.	.	.	.	.	.	.	.	.	.	.	.	.	.	.	.	.
chr1	157835076	.	A	C	.	PASS	CD5L	intronic	NM_001347698,NM_005894	.	.	.	ENST00000368174.4	1q23.1	.	.	.	.	.	.	.	.	.	.	.	.	.	.	.	.	.	.	.	.	.	.	.	.	.	.	.	.	.	.	.	.	.	.	.
chr1	158410835	.	C	G	.	PASS	.	intergenic	NM_001004475,NM_001004476	dist=11369;dist=9093	.	.	.	1q23.1	.	.	.	.	.	.	.	.	.	.	.	.	.	.	.	.	.	.	.	.	.	.	.	.	.	.	.	.	.	.	.	.	.	.	.
chr1	158412886	.	G	T	.	PASS	.	intergenic	NM_001004475,NM_001004476	dist=13420;dist=7042	.	.	.	1q23.1	.	.	Score=1866;Name="278654:MER68B(LTR)"	.	.	.	.	.	.	.	.	.	.	.	.	.	.	.	.	.	.	.	.	.	.	.	.	.	.	.	.	.	.	.	.
chr1	158697565	.	A	C	.	PASS	.	intergenic	NM_003126,NM_001005279	dist=10849;dist=2014	.	.	.	1q23.1	.	.	Score=2952;Name="279096:MLT2A2(LTR)"	.	.	.	.	.	.	.	.	.	.	.	.	.	.	.	.	.	.	.	.	.	.	.	.	.	.	.	.	.	.	.	.
chr1	159062425	.	T	C	.	PASS	.	downstream	NM_001348247,NM_004833	.	.	.	.	1q23.1	.	.	Score=529;Name="279632:L1MEc(LINE)"	.	.	.	.	.	.	.	.	.	.	.	.	.	.	.	.	.	.	.	.	.	.	.	.	.	.	.	.	.	.	.	.
chr1	159872976	.	A	C	.	PASS	CFAP45	exonic	NM_012337	.	missense SNV	CFAP45:NM_012337:exon11:c.T1545G:p.D515E	ENST00000544342.1,ENST00000426543.6,ENST00000368099.8	1q23.2	.	.	.	.	.	.	.	.	.	.	.	.	.	.	.	.	.	.	.	.	.	.	.	.	.	.	.	.	.	.	.	.	.	.	.
chr1	160693797	.	T	C	.	PASS	CD48	intronic	NM_001256030,NM_001778	.	.	.	ENST00000368046.7,ENST00000613788.1,ENST00000368045.3	1q23.3	.	.	Score=32110;Name="282399:HERVK-int(LTR)"	.	.	.	.	.	.	.	.	.	.	.	.	.	.	.	.	.	.	.	.	.	.	.	.	.	.	.	.	.	.	.	.
chr1	161031995	.	A	C	.	PASS	.	intergenic	NM_001348091,NM_001113207	dist=10652;dist=5637	.	.	ENST00000289779.7	1q23.3	.	.	Score=851;Name="283172:L1M5(LINE)"	.	.	.	.	.	.	.	.	.	.	.	.	.	.	.	.	.	.	.	.	.	.	.	.	.	.	.	.	.	.	.	.
chr1	161391735	.	G	T	.	PASS	.	intergenic	NM_001013625,NM_001136219	dist=23852;dist=113680	.	.	.	1q23.3	.	.	Score=1947;Name="283997:AluSz(SINE)"	.	.	.	.	.	.	.	.	.	.	.	.	.	.	.	.	.	.	.	.	.	.	.	.	.	.	.	.	.	.	.	.
chr1	161558618	rs2499425	T	G	.	PASS	.	intergenic	NM_001329120,NM_201563	dist=7881;dist=22721	.	.	ENST00000537821.2	1q23.3	.	Score=0.982978;Name=chr1:161600000	Score=664;Name="284317:MLT1G(LTR)"	rs2499425	.	.	.	.	.	.	.	.	.	.	.	.	.	.	.	.	.	.	.	.	.	.	.	.	.	.	.	.	.	.	.
chr1	163317570	.	C	G	.	PASS	RGS5	intronic	NM_001254748	.	.	.	ENST00000429865.5,ENST00000618415.4,ENST00000449680.5,ENST00000439699.1,ENST00000528689.5,ENST00000528019.5	1q23.3	.	.	Score=457;Name="287683:L2a(LINE)"	.	.	.	.	.	.	.	.	.	.	.	.	.	.	.	.	.	.	.	.	.	.	.	.	.	.	.	.	.	.	.	.
chr1	163693667	.	T	G	.	PASS	.	intergenic	NR_104294,NM_001204963	dist=270476;dist=865693	.	.	.	1q23.3	.	.	.	.	.	.	.	.	.	.	.	.	.	.	.	.	.	.	.	.	.	.	.	.	.	.	.	.	.	.	.	.	.	.	.
chr1	163800355	.	C	T	.	PASS	.	intergenic	NR_104294,NM_001204963	dist=377164;dist=759005	.	.	.	1q23.3	.	.	Score=1376;Name="288533:L1MC5a(LINE)"	.	.	.	.	.	.	.	.	.	.	.	.	.	.	.	.	.	.	.	.	.	.	.	.	.	.	.	.	.	.	.	.
chr1	164829442	.	C	G	.	PASS	PBX1	intronic	NM_001204961,NM_001204963,NM_002585	.	.	.	ENST00000560641.5,ENST00000607752.1,ENST00000540236.3,ENST00000559240.5,ENST00000367897.5,ENST00000627490.2,ENST00000612123.3,ENST00000420696.6	1q23.3	.	.	Score=616;Name="290190:MER3(DNA)"	.	.	.	.	.	.	.	.	.	.	.	.	.	.	.	.	.	.	.	.	.	.	.	.	.	.	.	.	.	.	.	.
chr1	165057063	.	T	G	.	PASS	.	intergenic	NM_001204963,NM_177398	dist=205240;dist=144804	.	.	.	1q23.3	.	.	.	.	.	.	.	.	.	.	.	.	.	.	.	.	.	.	.	.	.	.	.	.	.	.	.	.	.	.	.	.	.	.	.
chr1	165228308	.	C	G	.	PASS	LMX1A	intronic	NM_001174069,NM_177398	.	.	.	ENST00000294816.6,ENST00000367893.4,ENST00000342310.7	1q23.3	.	.	Score=832;Name="290918:LTR33A_(LTR)"	.	.	.	.	.	.	.	.	.	.	.	.	.	.	.	.	.	.	.	.	.	.	.	.	.	.	.	.	.	.	.	.
chr1	165733104	.	A	G	.	PASS	TMCO1	intronic	NM_001256164,NM_001256165,NM_019026	.	.	.	ENST00000612311.4,ENST00000580248.5,ENST00000367881.9,ENST00000392129.10,ENST00000464650.5	1q24.1	.	.	Score=493;Name="291937:MIR(SINE)"	.	.	.	.	.	.	.	.	.	.	.	.	.	.	.	.	.	.	.	.	.	.	.	.	.	.	.	.	.	.	.	.
chr1	166046895	.	G	T	.	PASS	.	intergenic	NM_012474,NM_001320302	dist=135277;dist=9023	.	.	.	1q24.1	.	.	.	.	.	.	.	.	.	.	.	.	.	.	.	.	.	.	.	.	.	.	.	.	.	.	.	.	.	.	.	.	.	.	.
chr1	167031098	.	C	A	.	PASS	.	intergenic	NM_001286378,NM_005814	dist=8886;dist=21738	.	.	.	1q24.1	.	.	Score=1604;Name="294202:L1MEd(LINE)"	.	.	.	.	.	.	.	.	.	.	.	.	.	.	.	.	.	.	.	.	.	.	.	.	.	.	.	.	.	.	.	.
chr1	168307596	.	T	C	.	PASS	TBX19	intronic	NM_005149	.	.	.	ENST00000367821.7	1q24.2	.	.	.	.	.	.	.	.	.	.	.	.	.	.	.	.	.	.	.	.	.	.	.	.	.	.	.	.	.	.	.	.	.	.	.
chr1	168575826	rs368124811	G	A	.	PASS	.	upstream	NM_002995	.	.	.	.	1q24.2	.	Score=0.972542;Name=chr1:168540478	.	rs368124811	.	.	.	.	.	.	.	.	.	.	.	.	.	.	.	.	.	.	.	.	.	.	.	.	.	.	.	.	.	.	.
chr1	169252130	.	C	T	.	PASS	NME7	intronic	NM_013330,NM_197972	.	.	.	ENST00000472647.5,ENST00000367811.7	1q24.2	.	.	Score=27558;Name="298529:L1PA2(LINE)"	.	.	.	.	.	.	.	.	.	.	.	.	.	.	.	.	.	.	.	.	.	.	.	.	.	.	.	.	.	.	.	.
chr1	169291131	.	A	C	.	PASS	NME7	intronic	NM_013330,NM_197972	.	.	.	ENST00000367811.7,ENST00000472647.5	1q24.2	.	.	Score=6788;Name="298575:L1PA7(LINE)"	.	.	.	.	.	.	.	.	.	.	.	.	.	.	.	.	.	.	.	.	.	.	.	.	.	.	.	.	.	.	.	.
chr1	169621821	.	G	C	.	PASS	SELP	intronic	NM_003005	.	.	.	ENST00000367786.6,ENST00000367788.6,ENST00000263686.10,ENST00000458599.6	1q24.2	.	.	.	.	.	.	.	.	.	.	.	.	.	.	.	.	.	.	.	.	.	.	.	.	.	.	.	.	.	.	.	.	.	.	.
chr1	170322250	.	G	C	.	PASS	.	intergenic	NR_026957,NR_125958	dist=38042;dist=139067	.	.	.	1q24.2	.	.	Score=7721;Name="300281:L1PA15(LINE)"	.	.	.	.	.	.	.	.	.	.	.	.	.	.	.	.	.	.	.	.	.	.	.	.	.	.	.	.	.	.	.	.
chr1	170427438	.	T	G	.	PASS	.	intergenic	NR_026957,NR_125958	dist=143230;dist=33879	.	.	.	1q24.2	.	.	Score=22484;Name="300432:L1PA8(LINE)"	.	.	.	.	.	.	.	.	.	.	.	.	.	.	.	.	.	.	.	.	.	.	.	.	.	.	.	.	.	.	.	.
chr1	170613847	.	C	G	.	PASS	.	intergenic	NM_001320252,NM_022716	dist=60014;dist=50325	.	.	ENST00000413005.1	1q24.2	.	.	Score=12576;Name="300715:L1PA7(LINE)"	.	.	.	.	.	.	.	.	.	.	.	.	.	.	.	.	.	.	.	.	.	.	.	.	.	.	.	.	.	.	.	.
chr1	170653736	.	A	C	.	PASS	.	intergenic	NM_001320252,NM_022716	dist=99903;dist=10436	.	.	.	1q24.2	.	.	Score=2535;Name="300789:AluSx1(SINE)"	.	.	.	.	.	.	.	.	.	.	.	.	.	.	.	.	.	.	.	.	.	.	.	.	.	.	.	.	.	.	.	.
chr1	171046448	.	T	A	.	PASS	MROH9	intronic	NM_001163629	.	.	.	ENST00000367759.8	1q24.3	.	.	Score=21725;Name="301422:L1MA1(LINE)"	.	.	.	.	.	.	.	.	.	.	.	.	.	.	.	.	.	.	.	.	.	.	.	.	.	.	.	.	.	.	.	.
chr1	171523952	.	C	G	.	PASS	PRRC2C	intronic	NM_015172	.	.	.	ENST00000392078.7,ENST00000338920.8,ENST00000426496.6,ENST00000367742.7	1q24.3	.	.	Score=2447;Name="302385:AluSz(SINE)"	.	.	.	.	.	.	.	.	.	.	.	.	.	.	.	.	.	.	.	.	.	.	.	.	.	.	.	.	.	.	.	.
chr1	171680847	.	C	T	.	PASS	.	intergenic	NM_000261,NM_003762	dist=28214;dist=19309	.	.	.	1q24.3	.	.	Score=2210;Name="302703:AluSz6(SINE)"	.	.	.	.	.	.	.	.	.	.	.	.	.	.	.	.	.	.	.	.	.	.	.	.	.	.	.	.	.	.	.	.
chr1	171848523	.	A	T	.	PASS	DNM3	intronic	NM_001136127,NM_001278252,NM_001350204,NM_001350205,NM_001350206,NM_015569	.	.	.	ENST00000355305.9,ENST00000367733.6,ENST00000627582.2,ENST00000520906.5,ENST00000367731.5	1q24.3	.	.	.	.	.	.	.	.	.	.	.	.	.	.	.	.	.	.	.	.	.	.	.	.	.	.	.	.	.	.	.	.	.	.	.
chr1	172086824	.	G	T	.	PASS	DNM3	intronic	NM_001136127,NM_001278252,NM_001350204,NM_001350205,NM_001350206,NM_015569	.	.	.	ENST00000627582.2,ENST00000367731.5,ENST00000520906.5,ENST00000367733.6,ENST00000355305.9	1q24.3	.	.	Score=542;Name="303450:MER3(DNA)"	.	.	.	.	.	.	.	.	.	.	.	.	.	.	.	.	.	.	.	.	.	.	.	.	.	.	.	.	.	.	.	.
chr1	172821867	.	G	T	.	PASS	.	intergenic	NM_001302746,NM_005092	dist=154995;dist=219353	.	.	ENST00000432694.2	1q24.3	.	.	.	.	.	.	.	.	.	.	.	.	.	.	.	.	.	.	.	.	.	.	.	.	.	.	.	.	.	.	.	.	.	.	.
chr1	173075974	rs995496865	A	C	.	PASS	.	intergenic	NM_005092,NM_001297562	dist=25011;dist=107757	.	.	.	1q25.1	.	.	Score=17612;Name="305027:L1P1(LINE)"	rs995496865	.	.	.	.	.	.	.	.	.	.	.	.	.	.	.	.	.	.	.	.	.	.	.	.	.	.	.	.	.	.	.
chr1	173334954	.	T	C	.	PASS	LOC100506023	ncRNA_intronic	NR_037845	.	.	.	.	1q25.1	.	.	Score=29262;Name="305482:ERVL-B4-int(LTR)"	.	.	.	.	.	.	.	.	.	.	.	.	.	.	.	.	.	.	.	.	.	.	.	.	.	.	.	.	.	.	.	.
chr1	173779369	rs928440646	G	T	.	PASS	KLHL20	intronic	NM_014458	.	.	.	ENST00000209884.4	1q25.1	.	.	Score=2354;Name="306298:AluSx(SINE)"	rs928440646	.	.	.	.	.	.	.	.	.	.	.	.	.	.	.	.	.	.	.	.	.	.	.	.	.	.	.	.	.	.	.
chr1	173802022	.	C	A	.	PASS	CENPL	intronic	NM_001127181,NM_001171182,NM_033319	.	.	.	ENST00000345664.10,ENST00000367710.7,ENST00000356198.6	1q25.1	.	.	Score=1269;Name="306365:AluSz6(SINE)"	.	.	.	.	.	.	.	.	.	.	.	.	.	.	.	.	.	.	.	.	.	.	.	.	.	.	.	.	.	.	.	.
chr1	173918940	.	T	G	.	PASS	.	intergenic	NM_000488,NM_001300851	dist=1562;dist=12144	.	.	.	1q25.1	.	.	Score=624;Name="306578:L2a(LINE)"	.	.	.	.	.	.	.	.	.	.	.	.	.	.	.	.	.	.	.	.	.	.	.	.	.	.	.	.	.	.	.	.
chr1	174173729	.	G	C	.	PASS	RABGAP1L	intronic	NM_014857	.	.	.	ENST00000251507.8,ENST00000357444.10	1q25.1	.	.	Score=197;Name="307229:L2b(LINE)"	.	.	.	.	.	.	.	.	.	.	.	.	.	.	.	.	.	.	.	.	.	.	.	.	.	.	.	.	.	.	.	.
chr1	174471515	.	C	G	.	PASS	RABGAP1L	intronic	NM_014857	.	.	.	ENST00000357444.10,ENST00000251507.8	1q25.1	.	.	.	.	.	.	.	.	.	.	.	.	.	.	.	.	.	.	.	.	.	.	.	.	.	.	.	.	.	.	.	.	.	.	.
chr1	174558644	.	T	C	.	PASS	RABGAP1L	intronic	NM_014857	.	.	.	ENST00000251507.8	1q25.1	.	.	.	.	.	.	.	.	.	.	.	.	.	.	.	.	.	.	.	.	.	.	.	.	.	.	.	.	.	.	.	.	.	.	.
chr1	174573685	.	A	T	.	PASS	RABGAP1L	intronic	NM_014857	.	.	.	ENST00000251507.8	1q25.1	.	.	.	.	.	.	.	.	.	.	.	.	.	.	.	.	.	.	.	.	.	.	.	.	.	.	.	.	.	.	.	.	.	.	.
chr1	174667265	.	C	A	.	PASS	RABGAP1L	intronic	NM_014857	.	.	.	ENST00000251507.8	1q25.1	.	.	.	.	.	.	.	.	.	.	.	.	.	.	.	.	.	.	.	.	.	.	.	.	.	.	.	.	.	.	.	.	.	.	.
chr1	174667727	.	T	A	.	PASS	RABGAP1L	intronic	NM_014857	.	.	.	ENST00000251507.8	1q25.1	.	.	Score=349;Name="308054:L2b(LINE)"	.	.	.	.	.	.	.	.	.	.	.	.	.	.	.	.	.	.	.	.	.	.	.	.	.	.	.	.	.	.	.	.
chr1	174704494	.	C	A	.	PASS	RABGAP1L	intronic	NM_014857	.	.	.	ENST00000325589.9,ENST00000251507.8,ENST00000347255.6,ENST00000367687.5	1q25.1	.	.	.	.	.	.	.	.	.	.	.	.	.	.	.	.	.	.	.	.	.	.	.	.	.	.	.	.	.	.	.	.	.	.	.
chr1	174974931	.	G	T	.	PASS	RABGAP1L	intronic	NM_001243764,NM_001243765,NM_001330989	.	.	.	ENST00000325589.9,ENST00000367688.3,ENST00000489615.5,ENST00000347255.6,ENST00000367687.5,ENST00000392064.6	1q25.1	.	.	.	.	.	.	.	.	.	.	.	.	.	.	.	.	.	.	.	.	.	.	.	.	.	.	.	.	.	.	.	.	.	.	.
chr1	175558072	.	T	G	.	PASS	TNR	intronic	NM_001328635,NM_003285	.	.	.	ENST00000367674.6,ENST00000263525.6	1q25.1	.	.	Score=6460;Name="309668:L1PA2(LINE)"	.	.	.	.	.	.	.	.	.	.	.	.	.	.	.	.	.	.	.	.	.	.	.	.	.	.	.	.	.	.	.	.
chr1	175905749	.	A	G	.	PASS	.	intergenic	NR_125964,NM_022457	dist=25285;dist=39077	.	.	ENST00000426575.1	1q25.1	.	.	.	.	.	.	.	.	.	.	.	.	.	.	.	.	.	.	.	.	.	.	.	.	.	.	.	.	.	.	.	.	.	.	.
chr1	176789416	.	T	G	.	PASS	PAPPA2	intronic	NM_020318	.	.	.	ENST00000367662.4	1q25.2	.	.	Score=3438;Name="311915:L1PA4(LINE)"	.	.	.	.	.	.	.	.	.	.	.	.	.	.	.	.	.	.	.	.	.	.	.	.	.	.	.	.	.	.	.	.
chr1	178358931	.	T	A	.	PASS	RASAL2	intronic	NM_004841,NM_170692	.	.	.	ENST00000367649.7,ENST00000462775.5	1q25.2	.	.	Score=1188;Name="314599:L1ME3F(LINE)"	.	.	.	.	.	.	.	.	.	.	.	.	.	.	.	.	.	.	.	.	.	.	.	.	.	.	.	.	.	.	.	.
chr1	178734488	.	C	A	.	PASS	RALGPS2	intronic	NM_001286247,NM_152663	.	.	.	ENST00000367634.6,ENST00000367635.7	1q25.2	.	.	Score=1034;Name="315336:L1MB8(LINE)"	.	.	.	.	.	.	.	.	.	.	.	.	.	.	.	.	.	.	.	.	.	.	.	.	.	.	.	.	.	.	.	.
chr1	178738298	.	T	A	.	PASS	RALGPS2	intronic	NM_001286247,NM_152663	.	.	.	ENST00000367635.7,ENST00000367634.6	1q25.2	.	.	Score=2186;Name="315349:AluSx(SINE)"	.	.	.	.	.	.	.	.	.	.	.	.	.	.	.	.	.	.	.	.	.	.	.	.	.	.	.	.	.	.	.	.
chr1	179236450	.	T	A	.	PASS	.	intergenic	NM_001168236,NM_001252512	dist=6766;dist=57264	.	.	.	1q25.2	.	.	Score=1213;Name="316332:Tigger9a(DNA)"	.	.	.	.	.	.	.	.	.	.	.	.	.	.	.	.	.	.	.	.	.	.	.	.	.	.	.	.	.	.	.	.
chr1	179450907	.	G	C	.	PASS	AXDND1	intronic	NM_144696	.	.	.	ENST00000617277.4,ENST00000367618.7,ENST00000457238.6	1q25.2	.	.	Score=1384;Name="316865:AluJr(SINE)"	.	.	.	.	.	.	.	.	.	.	.	.	.	.	.	.	.	.	.	.	.	.	.	.	.	.	.	.	.	.	.	.
chr1	180246618	.	A	C	.	PASS	LHX4	intronic	NM_033343	.	.	.	ENST00000263726.3	1q25.2	.	.	Score=2381;Name="318378:AluSx(SINE)"	.	.	.	.	.	.	.	.	.	.	.	.	.	.	.	.	.	.	.	.	.	.	.	.	.	.	.	.	.	.	.	.
chr1	181193236	.	A	C	.	PASS	.	intergenic	NR_125966,NR_046249	dist=11030;dist=43152	.	.	.	1q25.3	.	.	.	.	.	.	.	.	.	.	.	.	.	.	.	.	.	.	.	.	.	.	.	.	.	.	.	.	.	.	.	.	.	.	.
chr1	181673783	.	A	C	.	PASS	CACNA1E	intronic	NM_000721,NM_001205293,NM_001205294	.	.	.	ENST00000357570.9,ENST00000367567.8,ENST00000367570.5,ENST00000358338.7,ENST00000621551.3,ENST00000367573.6,ENST00000621791.4,ENST00000360108.7	1q25.3	.	.	.	.	.	.	.	.	.	.	.	.	.	.	.	.	.	.	.	.	.	.	.	.	.	.	.	.	.	.	.	.	.	.	.
chr1	182326810	.	T	G	.	PASS	.	intergenic	NR_104175,NM_002065	dist=12749;dist=51283	.	.	.	1q25.3	.	.	Score=2358;Name="322165:AluSx(SINE)"	.	.	.	.	.	.	.	.	.	.	.	.	.	.	.	.	.	.	.	.	.	.	.	.	.	.	.	.	.	.	.	.
chr1	182455515	.	G	A	.	PASS	RGSL1	intronic	NM_001137669	.	.	.	ENST00000294854.12	1q25.3	.	.	Score=2398;Name="322446:AluSx1(SINE)"	.	.	.	.	.	.	.	.	.	.	.	.	.	.	.	.	.	.	.	.	.	.	.	.	.	.	.	.	.	.	.	.
chr1	182521998	.	T	C	.	PASS	RGSL1	intronic	NM_001137669	.	.	.	ENST00000294854.12	1q25.3	.	.	.	.	.	.	.	.	.	.	.	.	.	.	.	.	.	.	.	.	.	.	.	.	.	.	.	.	.	.	.	.	.	.	.
chr1	182859966	.	G	A	.	PASS	DHX9	intronic	NM_001357	.	.	.	ENST00000367549.3	1q25.3	.	.	.	.	.	.	.	.	.	.	.	.	.	.	.	.	.	.	.	.	.	.	.	.	.	.	.	.	.	.	.	.	.	.	.
chr1	183340330	rs906986895	T	C	.	PASS	NMNAT2	intronic	NM_015039	.	.	.	ENST00000287713.6	1q25.3	.	.	Score=2353;Name="324192:AluSx(SINE)"	rs906986895	.	.	.	.	.	.	.	.	.	.	.	.	.	.	.	.	.	.	.	.	.	.	.	.	.	.	.	.	.	.	.
chr1	183401865	.	T	G	.	PASS	NMNAT2	intronic	NM_015039	.	.	.	ENST00000287713.6	1q25.3	.	.	Score=26023;Name="324321:L1PA5(LINE)"	.	.	.	.	.	.	.	.	.	.	.	.	.	.	.	.	.	.	.	.	.	.	.	.	.	.	.	.	.	.	.	.
chr1	183613512	.	A	C	.	PASS	.	intergenic	NM_001127651,NM_005717	dist=22591;dist=12681	.	.	.	1q25.3	.	.	Score=2647;Name="324740:LTR7(LTR)"	.	.	.	.	.	.	.	.	.	.	.	.	.	.	.	.	.	.	.	.	.	.	.	.	.	.	.	.	.	.	.	.
chr1	183945294	.	C	G	.	PASS	COLGALT2	intronic	NM_001303420,NM_001303421,NM_015101	.	.	.	ENST00000367521.5,ENST00000367520.3,ENST00000361927.8	1q25.3	.	.	.	.	.	.	.	.	.	.	.	.	.	.	.	.	.	.	.	.	.	.	.	.	.	.	.	.	.	.	.	.	.	.	.
chr1	184246791	.	A	C	.	PASS	.	intergenic	NM_052965,NM_030806	dist=172581;dist=140225	.	.	.	1q25.3	.	.	Score=637;Name="325843:L1ME2z(LINE)"	.	.	.	.	.	.	.	.	.	.	.	.	.	.	.	.	.	.	.	.	.	.	.	.	.	.	.	.	.	.	.	.
chr1	184273492	.	C	A	.	PASS	.	intergenic	NM_052965,NM_030806	dist=199282;dist=113524	.	.	.	1q25.3	.	.	.	.	.	.	.	.	.	.	.	.	.	.	.	.	.	.	.	.	.	.	.	.	.	.	.	.	.	.	.	.	.	.	.
chr1	184354147	.	T	C	.	PASS	.	intergenic	NM_052965,NM_030806	dist=279937;dist=32869	.	.	.	1q25.3	.	.	.	.	.	.	.	.	.	.	.	.	.	.	.	.	.	.	.	.	.	.	.	.	.	.	.	.	.	.	.	.	.	.	.
chr1	184775143	.	C	T	.	PASS	.	intergenic	NM_025191,NM_052966	dist=20236;dist=15882	.	.	.	1q25.3	.	.	Score=2442;Name="326865:AluY(SINE)"	.	.	.	.	.	.	.	.	.	.	.	.	.	.	.	.	.	.	.	.	.	.	.	.	.	.	.	.	.	.	.	.
chr1	184993781	.	G	T	.	PASS	.	intergenic	NM_052966,NR_146489	dist=19195;dist=7746	.	.	.	1q25.3	.	.	Score=1668;Name="327287:AluJb(SINE)"	.	.	.	.	.	.	.	.	.	.	.	.	.	.	.	.	.	.	.	.	.	.	.	.	.	.	.	.	.	.	.	.
chr1	185056325	.	T	A	.	PASS	RNF2	intronic	NM_007212	.	.	.	ENST00000367509.8,ENST00000367510.7	1q25.3	.	.	.	.	.	.	.	.	.	.	.	.	.	.	.	.	.	.	.	.	.	.	.	.	.	.	.	.	.	.	.	.	.	.	.
chr1	185253153	.	G	C	.	PASS	SWT1	intronic	NM_001105518,NM_017673	.	.	.	ENST00000367500.8,ENST00000367501.7	1q25.3	.	.	Score=27581;Name="327807:L1PA2(LINE)"	.	.	.	.	.	.	.	.	.	.	.	.	.	.	.	.	.	.	.	.	.	.	.	.	.	.	.	.	.	.	.	.
chr1	185253160	.	G	A	.	PASS	SWT1	intronic	NM_001105518,NM_017673	.	.	.	ENST00000367500.8,ENST00000367501.7	1q25.3	.	.	Score=27581;Name="327807:L1PA2(LINE)"	.	.	.	.	.	.	.	.	.	.	.	.	.	.	.	.	.	.	.	.	.	.	.	.	.	.	.	.	.	.	.	.
chr1	185400555	.	A	C	.	PASS	.	intergenic	NR_038424,NR_110793	dist=65516;dist=157825	.	.	.	1q25.3	.	.	Score=1966;Name="328060:AluJb(SINE)"	.	.	.	.	.	.	.	.	.	.	.	.	.	.	.	.	.	.	.	.	.	.	.	.	.	.	.	.	.	.	.	.
chr1	185470652	rs906180286	C	A	.	PASS	.	intergenic	NR_038424,NR_110793	dist=135613;dist=87728	.	.	.	1q25.3	.	.	.	rs906180286	.	.	.	.	.	.	.	.	.	.	.	.	.	.	.	.	.	.	.	.	.	.	.	.	.	.	.	.	.	.	.
chr1	185498951	.	T	C	.	PASS	.	intergenic	NR_038424,NR_110793	dist=163912;dist=59429	.	.	.	1q25.3	.	.	Score=339;Name="328243:L1M5(LINE)"	.	.	.	.	.	.	.	.	.	.	.	.	.	.	.	.	.	.	.	.	.	.	.	.	.	.	.	.	.	.	.	.
chr1	185637308	.	G	C	.	PASS	.	intergenic	NR_110793,NM_031935	dist=8820;dist=97243	.	.	.	1q25.3	.	.	Score=4121;Name="328494:MER72B(LTR)"	.	.	.	.	.	.	.	.	.	.	.	.	.	.	.	.	.	.	.	.	.	.	.	.	.	.	.	.	.	.	.	.
chr1	187449391	.	T	G	.	PASS	LINC01037	ncRNA_intronic	NR_132374	.	.	.	ENST00000427337.1	1q31.1	.	.	.	.	.	.	.	.	.	.	.	.	.	.	.	.	.	.	.	.	.	.	.	.	.	.	.	.	.	.	.	.	.	.	.
chr1	188046018	.	C	G	.	PASS	.	intergenic	NR_132374,NM_001317188	dist=568796;dist=2051649	.	.	.	1q31.1	.	.	.	.	.	.	.	.	.	.	.	.	.	.	.	.	.	.	.	.	.	.	.	.	.	.	.	.	.	.	.	.	.	.	.
chr1	188131353	.	C	G	.	PASS	.	intergenic	NR_132374,NM_001317188	dist=654131;dist=1966314	.	.	.	1q31.1	.	.	Score=2103;Name="332556:AluSp(SINE)"	.	.	.	.	.	.	.	.	.	.	.	.	.	.	.	.	.	.	.	.	.	.	.	.	.	.	.	.	.	.	.	.
chr1	188232386	.	T	G	.	PASS	.	intergenic	NR_132374,NM_001317188	dist=755164;dist=1865281	.	.	.	1q31.1	.	.	.	.	.	.	.	.	.	.	.	.	.	.	.	.	.	.	.	.	.	.	.	.	.	.	.	.	.	.	.	.	.	.	.
chr1	188561032	.	C	A	.	PASS	.	intergenic	NR_132374,NM_001317188	dist=1083810;dist=1536635	.	.	.	1q31.1	.	.	.	.	.	.	.	.	.	.	.	.	.	.	.	.	.	.	.	.	.	.	.	.	.	.	.	.	.	.	.	.	.	.	.
chr1	188677167	.	T	G	.	PASS	.	intergenic	NR_132374,NM_001317188	dist=1199945;dist=1420500	.	.	.	1q31.1	.	.	.	.	.	.	.	.	.	.	.	.	.	.	.	.	.	.	.	.	.	.	.	.	.	.	.	.	.	.	.	.	.	.	.
chr1	188756553	rs200130854	C	T	.	PASS	.	intergenic	NR_132374,NM_001317188	dist=1279331;dist=1341114	.	.	.	1q31.1	.	.	Score=27367;Name="333499:L1PA2(LINE)"	rs200130854	.	.	.	.	.	.	.	.	.	.	.	.	.	.	.	.	.	.	.	.	.	.	.	.	.	.	.	.	.	.	.
chr1	189313057	.	T	G	.	PASS	.	intergenic	NR_132374,NM_001317188	dist=1835835;dist=784610	.	.	.	1q31.1	.	.	Score=16369;Name="334370:MER34-int(LTR)"	.	.	.	.	.	.	.	.	.	.	.	.	.	.	.	.	.	.	.	.	.	.	.	.	.	.	.	.	.	.	.	.
chr1	189345894	.	G	T	.	PASS	.	intergenic	NR_132374,NM_001317188	dist=1868672;dist=751773	.	.	.	1q31.1	.	.	Score=253;Name="334412:L1M5(LINE)"	.	.	.	.	.	.	.	.	.	.	.	.	.	.	.	.	.	.	.	.	.	.	.	.	.	.	.	.	.	.	.	.
chr1	189364243	.	G	C	.	PASS	.	intergenic	NR_132374,NM_001317188	dist=1887021;dist=733424	.	.	.	1q31.1	.	.	Score=7638;Name="334447:L1PA3(LINE)"	.	.	.	.	.	.	.	.	.	.	.	.	.	.	.	.	.	.	.	.	.	.	.	.	.	.	.	.	.	.	.	.
chr1	189885113	.	A	C	.	PASS	.	intergenic	NONE,NM_001317188	dist=NONE;dist=212554	.	.	.	1q31.1	.	.	Score=5276;Name="335312:L1PA16(LINE)"	.	.	.	.	.	.	.	.	.	.	.	.	.	.	.	.	.	.	.	.	.	.	.	.	.	.	.	.	.	.	.	.
chr1	189960118	.	T	A	.	PASS	.	intergenic	NONE,NM_001317188	dist=NONE;dist=137549	.	.	.	1q31.1	.	.	.	.	.	.	.	.	.	.	.	.	.	.	.	.	.	.	.	.	.	.	.	.	.	.	.	.	.	.	.	.	.	.	.
chr1	190020027	.	G	T	.	PASS	.	intergenic	NONE,NM_001317188	dist=NONE;dist=77640	.	.	.	1q31.1	.	.	Score=3158;Name="335522:MER6A(DNA)"	.	.	.	.	.	.	.	.	.	.	.	.	.	.	.	.	.	.	.	.	.	.	.	.	.	.	.	.	.	.	.	.
chr1	190240893	rs895788148	A	T	.	PASS	BRINP3	intronic	NM_001317188,NM_199051	.	.	.	ENST00000367462.4	1q31.1	.	.	Score=2274;Name="335888:AluSq2(SINE)"	rs895788148	.	.	.	.	.	.	.	.	.	.	.	.	.	.	.	.	.	.	.	.	.	.	.	.	.	.	.	.	.	.	.
chr1	190247052	rs1034195424	T	A	.	PASS	BRINP3	intronic	NM_001317188,NM_199051	.	.	.	ENST00000367462.4	1q31.1	.	.	.	rs1034195424	.	.	.	.	.	.	.	.	.	.	.	.	.	.	.	.	.	.	.	.	.	.	.	.	.	.	.	.	.	.	.
chr1	190380093	.	C	T	.	PASS	BRINP3	intronic	NM_001317188,NM_199051	.	.	.	ENST00000367462.4	1q31.1	.	.	Score=670;Name="336102:L2a(LINE)"	.	.	.	.	.	.	.	.	.	.	.	.	.	.	.	.	.	.	.	.	.	.	.	.	.	.	.	.	.	.	.	.
chr1	190865316	.	A	C	.	PASS	.	intergenic	NR_033922,NR_146892	dist=63658;dist=355843	.	.	.	1q31.2	.	.	Score=2479;Name="336844:L1PA17(LINE)"	.	.	.	.	.	.	.	.	.	.	.	.	.	.	.	.	.	.	.	.	.	.	.	.	.	.	.	.	.	.	.	.
chr1	190899702	.	G	T	.	PASS	.	intergenic	NR_033922,NR_146892	dist=98044;dist=321457	.	.	.	1q31.2	.	.	Score=3182;Name="336899:L1M3b(LINE)"	.	.	.	.	.	.	.	.	.	.	.	.	.	.	.	.	.	.	.	.	.	.	.	.	.	.	.	.	.	.	.	.
chr1	191101015	.	C	A	.	PASS	.	intergenic	NR_033922,NR_146892	dist=299357;dist=120144	.	.	.	1q31.2	.	.	Score=3211;Name="337224:L1MC3(LINE)"	.	.	.	.	.	.	.	.	.	.	.	.	.	.	.	.	.	.	.	.	.	.	.	.	.	.	.	.	.	.	.	.
chr1	191116120	rs74129867	A	T	.	PASS	.	intergenic	NR_033922,NR_146892	dist=314462;dist=105039	.	.	.	1q31.2	.	.	Score=3822;Name="337237:L1PA15(LINE)"	rs74129867	.	.	.	.	.	.	.	0.1468	0.0562	0.0179	0.0779	0.0216	0.0676917	.	.	.	.	.	.	.	.	.	.	.	.	.	.	.	.	.	.
chr1	191367677	.	T	C	.	PASS	.	intergenic	NR_146892,NM_130782	dist=139179;dist=790785	.	.	.	1q31.2	.	.	.	.	.	.	.	.	.	.	.	.	.	.	.	.	.	.	.	.	.	.	.	.	.	.	.	.	.	.	.	.	.	.	.
chr1	191963874	.	G	C	.	PASS	.	intergenic	NR_146892,NM_130782	dist=735376;dist=194588	.	.	ENST00000430776.2	1q31.2	.	.	.	.	.	.	.	.	.	.	.	.	.	.	.	.	.	.	.	.	.	.	.	.	.	.	.	.	.	.	.	.	.	.	.
chr1	193102529	.	T	A	.	PASS	GLRX2	intronic	NM_001243399,NM_001319291,NM_016066,NM_197962	.	.	.	ENST00000367440.3,ENST00000367439.7	1q31.2	.	.	Score=2169;Name="340417:AluSx3(SINE)"	.	.	.	.	.	.	.	.	.	.	.	.	.	.	.	.	.	.	.	.	.	.	.	.	.	.	.	.	.	.	.	.
chr1	193914040	.	G	A	.	PASS	.	intergenic	NR_125789,NONE	dist=548087;dist=NONE	.	.	.	1q31.3	.	.	.	.	.	.	.	.	.	.	.	.	.	.	.	.	.	.	.	.	.	.	.	.	.	.	.	.	.	.	.	.	.	.	.
chr1	194094669	.	T	A	.	PASS	.	intergenic	NR_125789,NR_146895	dist=728716;dist=1950211	.	.	.	1q31.3	.	.	.	.	.	.	.	.	.	.	.	.	.	.	.	.	.	.	.	.	.	.	.	.	.	.	.	.	.	.	.	.	.	.	.
chr1	194448602	.	G	A	.	PASS	.	intergenic	NR_125789,NR_146895	dist=1082649;dist=1596278	.	.	.	1q31.3	.	.	.	.	.	.	.	.	.	.	.	.	.	.	.	.	.	.	.	.	.	.	.	.	.	.	.	.	.	.	.	.	.	.	.
chr1	194467825	.	T	C	.	PASS	.	intergenic	NR_125789,NR_146895	dist=1101872;dist=1577055	.	.	.	1q31.3	.	.	.	.	.	.	.	.	.	.	.	.	.	.	.	.	.	.	.	.	.	.	.	.	.	.	.	.	.	.	.	.	.	.	.
chr1	194622166	.	G	A	.	PASS	.	intergenic	NR_125789,NR_146895	dist=1256213;dist=1422714	.	.	.	1q31.3	.	.	Score=1340;Name="342915:ERVL-E-int(LTR)"	.	.	.	.	.	.	.	.	.	.	.	.	.	.	.	.	.	.	.	.	.	.	.	.	.	.	.	.	.	.	.	.
chr1	194706349	.	T	G	.	PASS	.	intergenic	NR_125789,NR_146895	dist=1340396;dist=1338531	.	.	.	1q31.3	.	.	.	.	.	.	.	.	.	.	.	.	.	.	.	.	.	.	.	.	.	.	.	.	.	.	.	.	.	.	.	.	.	.	.
chr1	194714574	.	G	T	.	PASS	.	intergenic	NR_125789,NR_146895	dist=1348621;dist=1330306	.	.	.	1q31.3	.	.	.	.	.	.	.	.	.	.	.	.	.	.	.	.	.	.	.	.	.	.	.	.	.	.	.	.	.	.	.	.	.	.	.
chr1	194857855	.	G	C	.	PASS	.	intergenic	NR_125789,NR_146895	dist=1491902;dist=1187025	.	.	.	1q31.3	.	.	.	.	.	.	.	.	.	.	.	.	.	.	.	.	.	.	.	.	.	.	.	.	.	.	.	.	.	.	.	.	.	.	.
chr1	194957356	.	G	C	.	PASS	.	intergenic	NR_125789,NR_146895	dist=1591403;dist=1087524	.	.	.	1q31.3	.	.	Score=2257;Name="343460:L1M2(LINE)"	.	.	.	.	.	.	.	.	.	.	.	.	.	.	.	.	.	.	.	.	.	.	.	.	.	.	.	.	.	.	.	.
chr1	195057731	.	A	G	.	PASS	.	intergenic	NR_125789,NR_146895	dist=1691778;dist=987149	.	.	.	1q31.3	.	.	.	.	.	.	.	.	.	.	.	.	.	.	.	.	.	.	.	.	.	.	.	.	.	.	.	.	.	.	.	.	.	.	.
chr1	195274828	rs56318014	G	A	.	PASS	.	intergenic	NR_125789,NR_146895	dist=1908875;dist=770052	.	.	.	1q31.3	.	.	Score=26;Name="343981:(AG)n(Simple_repeat)"	rs56318014	.	.	.	.	.	.	.	.	.	.	.	.	.	.	.	.	.	.	.	.	.	.	.	.	.	.	.	.	.	.	.
chr1	195632137	.	T	C	.	PASS	.	intergenic	NONE,NR_146895	dist=NONE;dist=412743	.	.	.	1q31.3	.	.	Score=9867;Name="344498:L1MA7(LINE)"	.	.	.	.	.	.	.	.	.	.	.	.	.	.	.	.	.	.	.	.	.	.	.	.	.	.	.	.	.	.	.	.
chr1	195771569	.	A	G	.	PASS	.	intergenic	NONE,NR_146895	dist=NONE;dist=273311	.	.	.	1q31.3	.	.	.	.	.	.	.	.	.	.	.	.	.	.	.	.	.	.	.	.	.	.	.	.	.	.	.	.	.	.	.	.	.	.	.
chr1	196010636	.	C	G	.	PASS	.	intergenic	NONE,NR_146895	dist=NONE;dist=34244	.	.	.	1q31.3	.	.	.	.	.	.	.	.	.	.	.	.	.	.	.	.	.	.	.	.	.	.	.	.	.	.	.	.	.	.	.	.	.	.	.
chr1	196352370	.	C	A	.	PASS	KCNT2	intronic	NM_001287819,NM_001287820,NM_198503	.	.	.	ENST00000294725.13,ENST00000609185.5,ENST00000451324.6,ENST00000367433.9	1q31.3	.	.	Score=21290;Name="345607:L1PA3(LINE)"	.	.	.	.	.	.	.	.	.	.	.	.	.	.	.	.	.	.	.	.	.	.	.	.	.	.	.	.	.	.	.	.
chr1	196599412	rs950588763	A	G	.	PASS	KCNT2	intronic	NM_001287819,NM_001287820,NM_198503	.	.	.	ENST00000294725.13,ENST00000609185.5,ENST00000451324.6,ENST00000367433.9	1q31.3	.	.	.	rs950588763	.	.	.	.	.	.	.	.	.	.	.	.	.	.	.	.	.	.	.	.	.	.	.	.	.	.	.	.	.	.	.
chr1	196750999	rs61822184	T	C	.	PASS	.	intergenic	NM_000186,NM_001166624	dist=3495;dist=23801	.	.	.	1q31.3	.	Score=0.977966;Name=chr1:196827189	Score=9551;Name="346229:L1MA9(LINE)"	rs61822184	.	.	.	.	.	.	.	.	.	.	.	.	.	.	.	.	.	.	.	.	.	.	.	.	.	.	.	.	.	.	.
chr1	197014465	.	G	T	.	PASS	.	intergenic	NM_030787,NM_001994	dist=4792;dist=24726	.	.	.	1q31.3	.	.	Score=2353;Name="346595:AluY(SINE)"	.	.	.	.	.	.	.	.	.	.	.	.	.	.	.	.	.	.	.	.	.	.	.	.	.	.	.	.	.	.	.	.
chr1	197190029	.	T	G	.	PASS	ZBTB41	intronic	NM_194314	.	.	.	ENST00000367405.4	1q31.3	.	.	Score=2202;Name="346895:AluSx(SINE)"	.	.	.	.	.	.	.	.	.	.	.	.	.	.	.	.	.	.	.	.	.	.	.	.	.	.	.	.	.	.	.	.
chr1	198409848	.	G	C	.	PASS	.	intergenic	NM_133494,NM_133326	dist=87430;dist=113374	.	.	.	1q31.3	.	.	.	.	.	.	.	.	.	.	.	.	.	.	.	.	.	.	.	.	.	.	.	.	.	.	.	.	.	.	.	.	.	.	.
chr1	199162838	.	A	C	.	PASS	.	intergenic	NR_126351,NM_003822	dist=86103;dist=864764	.	.	ENST00000452199.1	1q32.1	.	.	Score=655;Name="349943:L2c(LINE)"	.	.	.	.	.	.	.	.	.	.	.	.	.	.	.	.	.	.	.	.	.	.	.	.	.	.	.	.	.	.	.	.
chr1	199239348	.	G	C	.	PASS	.	intergenic	NR_126351,NM_003822	dist=162613;dist=788254	.	.	ENST00000452199.1	1q32.1	.	.	Score=3010;Name="350071:L1M8(LINE)"	.	.	.	.	.	.	.	.	.	.	.	.	.	.	.	.	.	.	.	.	.	.	.	.	.	.	.	.	.	.	.	.
chr1	199772418	.	T	G	.	PASS	.	intergenic	NR_126351,NM_003822	dist=695683;dist=255184	.	.	.	1q32.1	.	.	Score=1066;Name="350959:L2(LINE)"	.	.	.	.	.	.	.	.	.	.	.	.	.	.	.	.	.	.	.	.	.	.	.	.	.	.	.	.	.	.	.	.
chr1	200319578	.	T	C	.	PASS	.	intergenic	NM_003822,NR_040064	dist=142156;dist=22966	.	.	.	1q32.1	.	.	.	.	.	.	.	.	.	.	.	.	.	.	.	.	.	.	.	.	.	.	.	.	.	.	.	.	.	.	.	.	.	.	.
chr1	200509570	.	T	G	.	PASS	.	intergenic	NM_001281293,NM_001305792	dist=99512;dist=41927	.	.	.	1q32.1	.	.	.	.	.	.	.	.	.	.	.	.	.	.	.	.	.	.	.	.	.	.	.	.	.	.	.	.	.	.	.	.	.	.	.
chr1	200926925	.	A	T	.	PASS	.	intergenic	NM_018265,NR_147176	dist=11189;dist=2019	.	.	.	1q32.1	.	.	Score=2674;Name="353557:L1ME1(LINE)"	.	.	.	.	.	.	.	.	.	.	.	.	.	.	.	.	.	.	.	.	.	.	.	.	.	.	.	.	.	.	.	.
chr1	200977355	.	T	G	.	PASS	KIF21B	exonic	NM_001252100,NM_001252102,NM_001252103,NM_017596	.	synonymous SNV	KIF21B:NM_001252103:exon30:c.A4143C:p.S1381S,KIF21B:NM_017596:exon30:c.A4143C:p.S1381S,KIF21B:NM_001252100:exon31:c.A4182C:p.S1394S,KIF21B:NM_001252102:exon31:c.A4182C:p.S1394S	ENST00000422435.2,ENST00000332129.6,ENST00000360529.9,ENST00000461742.6	1q32.1	.	.	.	.	.	.	.	.	.	.	.	.	.	.	.	.	.	.	.	.	.	.	.	.	.	.	.	.	.	.	.	.	.	.	.
chr1	201394008	.	T	G	.	PASS	LAD1	intronic	NM_005558	.	.	.	ENST00000367313.4,ENST00000391967.6	1q32.1	.	.	Score=915;Name="354375:AluJo(SINE)"	.	.	.	.	.	.	.	.	.	.	.	.	.	.	.	.	.	.	.	.	.	.	.	.	.	.	.	.	.	.	.	.
chr1	201539858	.	T	G	.	PASS	.	intergenic	NR_026667,NM_020443	dist=19266;dist=108464	.	.	.	1q32.1	.	.	.	.	.	.	.	.	.	.	.	.	.	.	.	.	.	.	.	.	.	.	.	.	.	.	.	.	.	.	.	.	.	.	.
chr1	202351257	.	C	A	.	PASS	PPP1R12B	intronic	NM_001167857,NM_001167858,NM_001331029,NM_002481	.	.	.	ENST00000356764.6,ENST00000480184.5,ENST00000608999.5	1q32.1	.	.	Score=2162;Name="356474:AluSz6(SINE)"	.	.	.	.	.	.	.	.	.	.	.	.	.	.	.	.	.	.	.	.	.	.	.	.	.	.	.	.	.	.	.	.
chr1	202800154	.	A	C	.	PASS	KDM5B	intronic	NM_001314042,NM_001347591,NM_006618	.	.	.	ENST00000367265.7,ENST00000367264.6	1q32.1	.	.	Score=2357;Name="357350:AluSc(SINE)"	.	.	.	.	.	.	.	.	.	.	.	.	.	.	.	.	.	.	.	.	.	.	.	.	.	.	.	.	.	.	.	.
chr1	206268084	.	T	A	.	PASS	SRGAP2	intronic	NM_001170637,NM_001300952,NM_015326	.	.	.	ENST00000419187.6,ENST00000624873.3,ENST00000605610.5,ENST00000573034.7	1q32.1	.	Score=0.993485;Name=chr1:144888776	Score=2716;Name="364796:L1PA5(LINE)"	.	.	.	.	.	.	.	.	.	.	.	.	.	.	.	.	.	.	.	.	.	.	.	.	.	.	.	.	.	.	.	.
chr1	206268086	.	T	A	.	PASS	SRGAP2	intronic	NM_001170637,NM_001300952,NM_015326	.	.	.	ENST00000573034.7,ENST00000605610.5,ENST00000624873.3,ENST00000419187.6	1q32.1	.	Score=0.993485;Name=chr1:144888776	Score=2716;Name="364796:L1PA5(LINE)"	.	.	.	.	.	.	.	.	.	.	.	.	.	.	.	.	.	.	.	.	.	.	.	.	.	.	.	.	.	.	.	.
chr1	206328751	.	T	C	.	PASS	SRGAP2	intronic	NM_001170637,NM_001300952,NM_015326	.	.	.	ENST00000573034.7,ENST00000605610.5,ENST00000624873.3,ENST00000419187.6	1q32.1	.	Score=0.993485;Name=chr1:144888776	Score=29070;Name="364909:L1PA2(LINE)"	.	.	.	.	.	.	.	.	.	.	.	.	.	.	.	.	.	.	.	.	.	.	.	.	.	.	.	.	.	.	.	.
chr1	207782667	.	G	T	.	PASS	CD46	intronic	NM_002389,NM_153826,NM_172350,NM_172351,NM_172352,NM_172353,NM_172359,NM_172361	.	.	.	ENST00000358170.6,ENST00000357714.5,ENST00000480003.5,ENST00000360212.6,ENST00000322918.9,ENST00000322875.8,ENST00000354848.5,ENST00000367047.5,ENST00000367042.5,ENST00000367041.5	1q32.2	.	.	Score=2214;Name="367513:AluSg(SINE)"	.	.	.	.	.	.	.	.	.	.	.	.	.	.	.	.	.	.	.	.	.	.	.	.	.	.	.	.	.	.	.	.
chr1	208225650	.	T	G	.	PASS	PLXNA2	intronic	NM_025179	.	.	.	ENST00000367033.3	1q32.2	.	.	Score=1671;Name="368282:MLT1B(LTR)"	.	.	.	.	.	.	.	.	.	.	.	.	.	.	.	.	.	.	.	.	.	.	.	.	.	.	.	.	.	.	.	.
chr1	210735820	rs11119586	C	G	.	PASS	KCNH1	intronic	NM_002238,NM_172362	.	.	.	ENST00000271751.8,ENST00000367007.4	1q32.2	.	.	Score=23;Name="372820:(AG)n(Simple_repeat)"	rs11119586	.	.	.	.	.	.	.	.	.	.	.	.	.	.	.	.	.	.	.	.	.	.	.	.	.	.	.	.	.	.	.
chr1	210742937	.	G	C	.	PASS	KCNH1	intronic	NM_002238,NM_172362	.	.	.	ENST00000367007.4,ENST00000271751.8	1q32.2	.	.	.	.	.	.	.	.	.	.	.	.	.	.	.	.	.	.	.	.	.	.	.	.	.	.	.	.	.	.	.	.	.	.	.
chr1	211100044	.	T	G	.	PASS	KCNH1	intronic	NM_002238,NM_172362	.	.	.	ENST00000271751.8,ENST00000367007.4	1q32.2	.	.	Score=668;Name="373424:FLAM_C(SINE)"	.	.	.	.	.	.	.	.	.	.	.	.	.	.	.	.	.	.	.	.	.	.	.	.	.	.	.	.	.	.	.	.
chr1	211983051	.	A	T	.	PASS	INTS7	intronic	NM_001199809,NM_001199811,NM_001199812,NM_015434	.	.	.	ENST00000366993.7,ENST00000440600.6,ENST00000366992.7,ENST00000366994.7	1q32.3	.	.	.	.	.	.	.	.	.	.	.	.	.	.	.	.	.	.	.	.	.	.	.	.	.	.	.	.	.	.	.	.	.	.	.
chr1	212229379	.	C	A	.	PASS	LOC101929541	ncRNA_intronic	NR_125982,NR_125983,NR_125984	.	.	.	ENST00000431307.1	1q32.3	.	.	Score=2404;Name="375970:AluY(SINE)"	.	.	.	.	.	.	.	.	.	.	.	.	.	.	.	.	.	.	.	.	.	.	.	.	.	.	.	.	.	.	.	.
chr1	212436380	.	A	C	.	PASS	NENF	intronic	NM_013349	.	.	.	ENST00000366988.4	1q32.3	.	.	Score=2424;Name="376393:AluSg7(SINE)"	.	.	.	.	.	.	.	.	.	.	.	.	.	.	.	.	.	.	.	.	.	.	.	.	.	.	.	.	.	.	.	.
chr1	212616407	rs974005446	A	C	.	PASS	ATF3	intronic	NM_001030287,NM_001040619,NM_001206484,NM_001206486,NM_001206488,NM_001674	.	.	.	ENST00000613954.4,ENST00000336937.8,ENST00000366983.5,ENST00000341491.8,ENST00000366987.6,ENST00000613104.1	1q32.3	.	.	Score=2309;Name="376795:AluSx1(SINE)"	rs974005446	.	.	.	.	.	.	.	.	.	.	.	.	.	.	.	.	.	.	.	.	.	.	.	.	.	.	.	.	.	.	.
chr1	213933319	.	G	C	.	PASS	PROX1-AS1	ncRNA_intronic	NR_037850	.	.	.	ENST00000433082.6,ENST00000601335.5,ENST00000413560.5,ENST00000615085.3,ENST00000601854.5,ENST00000630355.2	1q32.3	.	.	.	.	.	.	.	.	.	.	.	.	.	.	.	.	.	.	.	.	.	.	.	.	.	.	.	.	.	.	.	.	.	.	.
chr1	214243090	.	T	G	.	PASS	.	intergenic	NM_001270616,NM_020197	dist=201586;dist=38132	.	.	.	1q32.3	.	.	Score=1977;Name="379860:AluSz(SINE)"	.	.	.	.	.	.	.	.	.	.	.	.	.	.	.	.	.	.	.	.	.	.	.	.	.	.	.	.	.	.	.	.
chr1	214759725	.	T	G	.	PASS	.	intergenic	NM_016343,NM_001017424	dist=95154;dist=245817	.	.	.	1q41	.	.	.	.	.	.	.	.	.	.	.	.	.	.	.	.	.	.	.	.	.	.	.	.	.	.	.	.	.	.	.	.	.	.	.
chr1	215730055	.	G	C	.	PASS	USH2A	intronic	NM_206933	.	.	.	ENST00000307340.7	1q41	.	.	.	.	.	.	.	.	.	.	.	.	.	.	.	.	.	.	.	.	.	.	.	.	.	.	.	.	.	.	.	.	.	.	.
chr1	215891243	.	C	T	.	PASS	USH2A	intronic	NM_206933	.	.	.	ENST00000307340.7,ENST00000414995.1	1q41	.	.	.	.	.	.	.	.	.	.	.	.	.	.	.	.	.	.	.	.	.	.	.	.	.	.	.	.	.	.	.	.	.	.	.
chr1	216201326	rs1014031566	G	T	.	PASS	USH2A	intronic	NM_007123,NM_206933	.	.	.	ENST00000307340.7,ENST00000420867.1,ENST00000366942.3	1q41	.	.	Score=2191;Name="382994:AluJb(SINE)"	rs1014031566	.	.	.	.	.	.	.	.	.	.	.	.	.	.	.	.	.	.	.	.	.	.	.	.	.	.	.	.	.	.	.
chr1	216249714	.	T	C	.	PASS	USH2A	intronic	NM_007123,NM_206933	.	.	.	ENST00000366942.3,ENST00000307340.7	1q41	.	.	.	.	.	.	.	.	.	.	.	.	.	.	.	.	.	.	.	.	.	.	.	.	.	.	.	.	.	.	.	.	.	.	.
chr1	216349895	.	C	T	.	PASS	USH2A	intronic	NM_007123,NM_206933	.	.	.	ENST00000307340.7,ENST00000366942.3	1q41	.	.	Score=2235;Name="383216:MSTA(LTR)"	.	.	.	.	.	.	.	.	.	.	.	.	.	.	.	.	.	.	.	.	.	.	.	.	.	.	.	.	.	.	.	.
chr1	216765189	.	G	C	.	PASS	ESRRG	intronic	NM_001134285,NM_001243505,NM_001243506,NM_001243507,NM_001243509,NM_001243510,NM_001243511,NM_001243512,NM_001243513,NM_001243514,NM_001350122,NM_001350123,NM_001350124,NM_001350125,NM_206594,NM_206595	.	.	.	ENST00000487276.5,ENST00000359162.6,ENST00000360012.7,ENST00000361395.6,ENST00000493603.5,ENST00000493748.5,ENST00000366938.6,ENST00000463665.5,ENST00000361525.7,ENST00000366940.6	1q41	.	.	.	.	.	.	.	.	.	.	.	.	.	.	.	.	.	.	.	.	.	.	.	.	.	.	.	.	.	.	.	.	.	.	.
chr1	216873235	.	G	C	.	PASS	ESRRG	intronic	NM_001134285,NM_001243505,NM_001243506,NM_001243507,NM_001243509,NM_001243510,NM_001243511,NM_001243512,NM_001243513,NM_001350122,NM_001350123,NM_001350124,NM_001350125,NM_206594,NM_206595	.	.	.	ENST00000366940.6,ENST00000366938.6,ENST00000493748.5,ENST00000361525.7,ENST00000463665.5,ENST00000493603.5,ENST00000359162.6,ENST00000487276.5,ENST00000361395.6	1q41	.	.	Score=2391;Name="383959:AluSq2(SINE)"	.	.	.	.	.	.	.	.	.	.	.	.	.	.	.	.	.	.	.	.	.	.	.	.	.	.	.	.	.	.	.	.
chr1	217072343	.	A	C	.	PASS	ESRRG	intronic	NM_001134285,NM_001243505,NM_001243506,NM_001243507,NM_001243509,NM_001243510,NM_001243511,NM_001350122,NM_001350123,NM_001350124,NM_001350125,NM_206594,NM_206595	.	.	.	ENST00000493748.5,ENST00000463665.5,ENST00000361525.7,ENST00000366940.6,ENST00000359162.6,ENST00000493603.5	1q41	.	.	.	.	.	.	.	.	.	.	.	.	.	.	.	.	.	.	.	.	.	.	.	.	.	.	.	.	.	.	.	.	.	.	.
chr1	217557449	.	G	T	.	PASS	GPATCH2	intronic	NM_018040	.	.	.	ENST00000366935.7	1q41	.	.	Score=1057;Name="385103:L1ME3E(LINE)"	.	.	.	.	.	.	.	.	.	.	.	.	.	.	.	.	.	.	.	.	.	.	.	.	.	.	.	.	.	.	.	.
chr1	217994892	.	T	A	.	PASS	.	intergenic	NR_048550,NR_110794	dist=74088;dist=48613	.	.	.	1q41	.	.	.	.	.	.	.	.	.	.	.	.	.	.	.	.	.	.	.	.	.	.	.	.	.	.	.	.	.	.	.	.	.	.	.
chr1	218028142	.	C	T	.	PASS	.	intergenic	NR_048550,NR_110794	dist=107338;dist=15363	.	.	.	1q41	.	.	.	.	.	.	.	.	.	.	.	.	.	.	.	.	.	.	.	.	.	.	.	.	.	.	.	.	.	.	.	.	.	.	.
chr1	219206991	.	T	C	.	PASS	LYPLAL1	intronic	NM_001300769,NM_001300770,NM_001300771,NM_001300772,NM_001350628,NM_001350629,NM_138794	.	.	.	ENST00000366927.3,ENST00000366928.9	1q41	.	.	.	.	.	.	.	.	.	.	.	.	.	.	.	.	.	.	.	.	.	.	.	.	.	.	.	.	.	.	.	.	.	.	.
chr1	219658306	.	T	A	.	PASS	.	intergenic	NR_135822,NM_018713	dist=100982;dist=255958	.	.	.	1q41	.	.	.	.	.	.	.	.	.	.	.	.	.	.	.	.	.	.	.	.	.	.	.	.	.	.	.	.	.	.	.	.	.	.	.
chr1	219980971	.	C	G	.	PASS	EPRS	intronic	NM_004446	.	.	.	ENST00000366923.7	1q41	.	.	Score=1997;Name="389283:AluJb(SINE)"	.	.	.	.	.	.	.	.	.	.	.	.	.	.	.	.	.	.	.	.	.	.	.	.	.	.	.	.	.	.	.	.
chr1	220134138	.	A	C	.	PASS	IARS2	intronic	NM_018060	.	.	.	ENST00000366922.2	1q41	.	.	Score=2016;Name="389662:L1MC4(LINE)"	.	.	.	.	.	.	.	.	.	.	.	.	.	.	.	.	.	.	.	.	.	.	.	.	.	.	.	.	.	.	.	.
chr1	221123462	.	T	C	.	PASS	.	intergenic	NM_021958,NR_024236	dist=238404;dist=206466	.	.	.	1q41	.	.	.	.	.	.	.	.	.	.	.	.	.	.	.	.	.	.	.	.	.	.	.	.	.	.	.	.	.	.	.	.	.	.	.
chr1	223744952	.	A	C	.	PASS	CAPN2	intronic	NM_001146068,NM_001748	.	.	.	ENST00000433674.6,ENST00000295006.5	1q41	.	.	Score=1793;Name="396099:AluSz(SINE)"	.	.	.	.	.	.	.	.	.	.	.	.	.	.	.	.	.	.	.	.	.	.	.	.	.	.	.	.	.	.	.	.
chr1	223912368	rs76982470	G	A	.	PASS	.	intergenic	NM_001031685,NR_132119	dist=66396;dist=38898	.	.	.	1q42.11	.	Score=0.985722;Name=chr2:242119885	.	rs76982470	.	.	.	.	.	.	.	.	.	.	.	.	.	.	.	.	.	.	.	.	.	.	.	.	.	.	.	.	.	.	.
chr1	223965868	.	T	C	.	PASS	GTF2IP20	ncRNA_intronic	NR_132119	.	.	.	.	1q42.11	.	Score=0.984851;Name=chr3:198177842	Score=1700;Name="396556:AluJb(SINE)"	.	.	.	.	.	.	.	.	.	.	.	.	.	.	.	.	.	.	.	.	.	.	.	.	.	.	.	.	.	.	.	.
chr1	224101083	.	G	A	.	PASS	.	intergenic	NR_136593,NM_001136115	dist=67224;dist=13004	.	.	.	1q42.11	.	.	Score=7634;Name="396857:SVA_D(Retroposon)"	.	.	.	.	.	.	.	.	.	.	.	.	.	.	.	.	.	.	.	.	.	.	.	.	.	.	.	.	.	.	.	.
chr1	225480044	.	A	C	.	PASS	.	intergenic	NM_194442,NM_018212	dist=51189;dist=6786	.	.	.	1q42.12	.	.	Score=2314;Name="399639:AluSp(SINE)"	.	.	.	.	.	.	.	.	.	.	.	.	.	.	.	.	.	.	.	.	.	.	.	.	.	.	.	.	.	.	.	.
chr1	227651111	.	T	G	.	PASS	ZNF678	intronic	NM_178549	.	.	.	ENST00000343776.9,ENST00000608949.5,ENST00000397097.4	1q42.13	.	.	Score=1047;Name="404166:L1M3a(LINE)"	.	.	.	.	.	.	.	.	.	.	.	.	.	.	.	.	.	.	.	.	.	.	.	.	.	.	.	.	.	.	.	.
chr1	227978452	.	G	A	.	PASS	.	intergenic	NM_003395,NM_033131	dist=30477;dist=28570	.	.	.	1q42.13	.	Score=0.982531;Name=chr2:242119885	Score=1003;Name="404674:AluSq(SINE)"	.	.	.	.	.	.	.	.	.	.	.	.	.	.	.	.	.	.	.	.	.	.	.	.	.	.	.	.	.	.	.	.
chr1	228276256	.	T	G	.	PASS	OBSCN	intronic	NM_001098623,NM_001271223,NM_052843	.	.	.	ENST00000422127.5,ENST00000284548.15,ENST00000570156.6,ENST00000366707.8	1q42.13	.	.	.	.	.	.	.	.	.	.	.	.	.	.	.	.	.	.	.	.	.	.	.	.	.	.	.	.	.	.	.	.	.	.	.
chr1	228948197	.	C	A	.	PASS	.	intergenic	NM_021205,NR_039659	dist=201528;dist=226486	.	.	.	1q42.13	.	.	Score=10815;Name="406266:HERVH-int(LTR)"	.	.	.	.	.	.	.	.	.	.	.	.	.	.	.	.	.	.	.	.	.	.	.	.	.	.	.	.	.	.	.	.
chr1	229601418	.	C	G	.	PASS	TAF5L	UTR3	NM_001025247	NM_001025247:c.*771G>C	.	.	ENST00000258281.6,ENST00000366675.3,ENST00000366676.5	1q42.13	.	.	.	.	.	.	.	.	.	.	.	.	.	.	.	.	.	.	.	.	.	.	.	.	.	.	.	.	.	.	.	.	.	.	.
chr1	229703667	.	C	A	.	PASS	.	intergenic	NM_014777,NR_146476	dist=43467;dist=171883	.	.	.	1q42.13	.	.	.	.	.	.	.	.	.	.	.	.	.	.	.	.	.	.	.	.	.	.	.	.	.	.	.	.	.	.	.	.	.	.	.
chr1	230003800	.	C	A	.	PASS	.	ncRNA_intronic	NR_135116	.	.	.	ENST00000445339.1	1q42.13	.	.	.	.	.	.	.	.	.	.	.	.	.	.	.	.	.	.	.	.	.	.	.	.	.	.	.	.	.	.	.	.	.	.	.
chr1	230139737	.	G	C	.	PASS	GALNT2	intronic	NM_001291866,NM_004481	.	.	.	ENST00000366672.4	1q42.13	.	.	.	.	.	.	.	.	.	.	.	.	.	.	.	.	.	.	.	.	.	.	.	.	.	.	.	.	.	.	.	.	.	.	.
chr1	230347485	.	T	C	.	PASS	PGBD5	intronic	NM_001258311	.	.	.	ENST00000525115.1,ENST00000391860.5	1q42.13	.	.	Score=1496;Name="409010:AluSq(SINE)"	.	.	.	.	.	.	.	.	.	.	.	.	.	.	.	.	.	.	.	.	.	.	.	.	.	.	.	.	.	.	.	.
chr1	231004558	rs914290987	C	A	.	PASS	.	intergenic	NM_022786,NM_198552	dist=3825;dist=14400	.	.	.	1q42.2	.	.	Score=39;Name="410238:(AC)n(Simple_repeat)"	rs914290987	.	.	.	.	.	.	.	.	.	.	.	.	.	.	.	.	.	.	.	.	.	.	.	.	.	.	.	.	.	.	.
chr1	231172884	.	G	C	.	PASS	TRIM67	intronic	NM_001004342,NM_001300889	.	.	.	ENST00000444294.7,ENST00000366653.5,ENST00000449018.7	1q42.2	.	.	.	.	.	.	.	.	.	.	.	.	.	.	.	.	.	.	.	.	.	.	.	.	.	.	.	.	.	.	.	.	.	.	.
chr1	231334551	.	A	C	.	PASS	EXOC8	UTR3	NM_175876	NM_175876:c.*1017T>G	.	.	ENST00000366645.1	1q42.2	.	.	.	.	.	.	.	.	.	.	.	.	.	.	.	.	.	.	.	.	.	.	.	.	.	.	.	.	.	.	.	.	.	.	.
chr1	233950200	.	C	G	.	PASS	SLC35F3	intronic	NM_173508	.	.	.	ENST00000366618.7	1q42.2	.	.	Score=2294;Name="415529:AluY(SINE)"	.	.	.	.	.	.	.	.	.	.	.	.	.	.	.	.	.	.	.	.	.	.	.	.	.	.	.	.	.	.	.	.
chr1	234209796	.	G	C	.	PASS	SLC35F3	intronic	NM_173508	.	.	.	ENST00000366618.7	1q42.2	.	.	.	.	.	.	.	.	.	.	.	.	.	.	.	.	.	.	.	.	.	.	.	.	.	.	.	.	.	.	.	.	.	.	.
chr1	234267280	.	A	T	.	PASS	SLC35F3	intronic	NM_001300845,NM_173508	.	.	.	ENST00000456078.1,ENST00000366618.7,ENST00000366617.3	1q42.2	.	.	Score=7299;Name="416096:SVA_E(Retroposon)"	.	.	.	.	.	.	.	.	.	.	.	.	.	.	.	.	.	.	.	.	.	.	.	.	.	.	.	.	.	.	.	.
chr1	234267283	.	C	T	.	PASS	SLC35F3	intronic	NM_001300845,NM_173508	.	.	.	ENST00000456078.1,ENST00000366617.3,ENST00000366618.7	1q42.2	.	.	Score=7299;Name="416096:SVA_E(Retroposon)"	.	.	.	.	.	.	.	.	.	.	.	.	.	.	.	.	.	.	.	.	.	.	.	.	.	.	.	.	.	.	.	.
chr1	234663373	.	C	T	.	PASS	.	intergenic	NR_125944,NR_038856	dist=2449;dist=60669	.	.	ENST00000441360.1	1q42.3	.	.	.	.	.	.	.	.	.	.	.	.	.	.	.	.	.	.	.	.	.	.	.	.	.	.	.	.	.	.	.	.	.	.	.
chr1	236367599	.	A	C	.	PASS	.	intergenic	NM_019891,NM_145861	dist=85560;dist=26781	.	.	.	1q42.3	.	.	Score=935;Name="420695:AluJo(SINE)"	.	.	.	.	.	.	.	.	.	.	.	.	.	.	.	.	.	.	.	.	.	.	.	.	.	.	.	.	.	.	.	.
chr1	236657620	.	G	T	.	PASS	.	intergenic	NM_018072,NM_001103	dist=53079;dist=28834	.	.	.	1q43	.	.	.	.	.	.	.	.	.	.	.	.	.	.	.	.	.	.	.	.	.	.	.	.	.	.	.	.	.	.	.	.	.	.	.
chr1	237715238	.	G	A	.	PASS	RYR2	intronic	NM_001035	.	.	.	ENST00000366574.6,ENST00000360064.7	1q43	.	.	Score=288;Name="423319:L2a(LINE)"	.	.	.	.	.	.	.	.	.	.	.	.	.	.	.	.	.	.	.	.	.	.	.	.	.	.	.	.	.	.	.	.
chr1	238424263	.	C	T	.	PASS	.	intergenic	NR_027247,NR_015407	dist=495944;dist=56121	.	.	.	1q43	.	.	Score=21;Name="424520:(AC)n(Simple_repeat)"	.	.	.	.	.	.	.	.	.	.	.	.	.	.	.	.	.	.	.	.	.	.	.	.	.	.	.	.	.	.	.	.
chr1	238825287	.	C	G	.	PASS	.	intergenic	NR_015407,NM_001347716	dist=339270;dist=561643	.	.	.	1q43	.	.	Score=1348;Name="425215:AluSx(SINE)"	.	.	.	.	.	.	.	.	.	.	.	.	.	.	.	.	.	.	.	.	.	.	.	.	.	.	.	.	.	.	.	.
chr1	238896564	.	G	T	.	PASS	.	intergenic	NR_015407,NM_001347716	dist=410547;dist=490366	.	.	.	1q43	.	.	Score=389;Name="425353:L1MEd(LINE)"	.	.	.	.	.	.	.	.	.	.	.	.	.	.	.	.	.	.	.	.	.	.	.	.	.	.	.	.	.	.	.	.
chr1	239543541	.	T	G	.	PASS	.	intronic	NM_001347716	.	.	.	.	1q43	.	.	Score=2524;Name="426512:AluY(SINE)"	.	.	.	.	.	.	.	.	.	.	.	.	.	.	.	.	.	.	.	.	.	.	.	.	.	.	.	.	.	.	.	.
chr1	239979047	.	G	C	.	PASS	.	intergenic	NM_001347716,NR_036695	dist=63598;dist=28477	.	.	.	1q43	.	.	Score=12061;Name="427231:THE1B-int(LTR)"	.	.	.	.	.	.	.	.	.	.	.	.	.	.	.	.	.	.	.	.	.	.	.	.	.	.	.	.	.	.	.	.
chr1	240021759	.	T	C	.	PASS	.	intergenic	NR_036695,NM_020066	dist=8499;dist=70126	.	.	.	1q43	.	.	.	.	.	.	.	.	.	.	.	.	.	.	.	.	.	.	.	.	.	.	.	.	.	.	.	.	.	.	.	.	.	.	.
chr1	240398040	.	G	C	.	PASS	FMN2	intronic	NM_001305424,NM_001348094,NM_020066	.	.	.	ENST00000319653.13,ENST00000545751.2	1q43	.	.	Score=2039;Name="427976:AluSz6(SINE)"	.	.	.	.	.	.	.	.	.	.	.	.	.	.	.	.	.	.	.	.	.	.	.	.	.	.	.	.	.	.	.	.
chr1	241135945	.	G	T	.	PASS	RGS7	intronic	NM_001282773,NM_001282775,NM_001282778,NM_001350113,NM_001350114,NM_001350115,NM_001350116,NM_002924	.	.	.	ENST00000366563.5,ENST00000348120.6,ENST00000366565.5,ENST00000366564.5	1q43	.	.	.	.	.	.	.	.	.	.	.	.	.	.	.	.	.	.	.	.	.	.	.	.	.	.	.	.	.	.	.	.	.	.	.
chr1	241157178	.	C	T	.	PASS	RGS7	intronic	NM_001282773,NM_001282775,NM_001282778,NM_001350113,NM_001350114,NM_001350115,NM_001350116,NM_002924	.	.	.	ENST00000366563.5,ENST00000348120.6,ENST00000366564.5,ENST00000366565.5	1q43	.	.	.	.	.	.	.	.	.	.	.	.	.	.	.	.	.	.	.	.	.	.	.	.	.	.	.	.	.	.	.	.	.	.	.
chr1	242778558	.	A	G	.	PASS	.	intergenic	NM_001320272,NR_029401	dist=253862;dist=277756	.	.	.	1q43	.	.	.	.	.	.	.	.	.	.	.	.	.	.	.	.	.	.	.	.	.	.	.	.	.	.	.	.	.	.	.	.	.	.	.
chr1	242805766	.	G	C	.	PASS	.	intergenic	NM_001320272,NR_029401	dist=281070;dist=250548	.	.	.	1q43	.	Score=0.970949;Name=chrY:11757891	.	.	.	.	.	.	.	.	.	.	.	.	.	.	.	.	.	.	.	.	.	.	.	.	.	.	.	.	.	.	.	.	.
chr1	242851081	.	A	C	.	PASS	.	intergenic	NM_001320272,NR_029401	dist=326385;dist=205233	.	.	.	1q43	.	.	Score=23869;Name="432794:L1PB1(LINE)"	.	.	.	.	.	.	.	.	.	.	.	.	.	.	.	.	.	.	.	.	.	.	.	.	.	.	.	.	.	.	.	.
chr1	243068137	.	A	G	.	PASS	LINC01347	ncRNA_intronic	NR_029401	.	.	.	.	1q43	.	Score=0.982023;Name=chr3:198177842	Score=386;Name="433252:LTR41(LTR)"	.	.	.	.	.	.	.	.	.	.	.	.	.	.	.	.	.	.	.	.	.	.	.	.	.	.	.	.	.	.	.	.
chr1	243098075	.	C	A	.	PASS	LINC01347	ncRNA_intronic	NR_029401	.	.	.	.	1q43	.	Score=0.982023;Name=chr3:198177842	Score=2350;Name="433327:AluSp(SINE)"	.	.	.	.	.	.	.	.	.	.	.	.	.	.	.	.	.	.	.	.	.	.	.	.	.	.	.	.	.	.	.	.
chr1	243133221	.	A	G	.	PASS	CEP170	intronic	NM_001042404,NM_001042405,NM_014812	.	.	.	ENST00000481987.5,ENST00000366543.5,ENST00000366544.5,ENST00000366542.5,ENST00000490813.5	1q43	.	Score=0.98294;Name=chr4:118467376	Score=418;Name="433411:L2c(LINE)"	.	.	.	.	.	.	.	.	.	.	.	.	.	.	.	.	.	.	.	.	.	.	.	.	.	.	.	.	.	.	.	.
chr1	244518319	.	A	C	.	PASS	C1orf101	intronic	NM_001130957,NM_001242340,NM_173807	.	.	.	ENST00000366534.8,ENST00000366533.8,ENST00000366531.7	1q44	.	.	.	.	.	.	.	.	.	.	.	.	.	.	.	.	.	.	.	.	.	.	.	.	.	.	.	.	.	.	.	.	.	.	.
chr1	244746746	.	C	T	.	PASS	.	intergenic	NM_001297746,NM_001312871	dist=37712;dist=88560	.	.	.	1q44	.	.	.	.	.	.	.	.	.	.	.	.	.	.	.	.	.	.	.	.	.	.	.	.	.	.	.	.	.	.	.	.	.	.	.
chr1	244926521	.	T	G	.	PASS	.	intergenic	NM_031844,NR_111907	dist=61996;dist=38683	.	.	.	1q44	.	.	Score=2075;Name="436980:AluSz6(SINE)"	.	.	.	.	.	.	.	.	.	.	.	.	.	.	.	.	.	.	.	.	.	.	.	.	.	.	.	.	.	.	.	.
chr1	245203195	.	C	A	.	PASS	KIF26B	intronic	NM_018012	.	.	.	ENST00000407071.6	1q44	.	.	Score=2193;Name="437669:AluSg(SINE)"	.	.	.	.	.	.	.	.	.	.	.	.	.	.	.	.	.	.	.	.	.	.	.	.	.	.	.	.	.	.	.	.
chr1	245510616	.	T	G	.	PASS	KIF26B	intronic	NM_018012	.	.	.	ENST00000407071.6	1q44	.	.	.	.	.	.	.	.	.	.	.	.	.	.	.	.	.	.	.	.	.	.	.	.	.	.	.	.	.	.	.	.	.	.	.
chr1	246030921	.	A	C	.	PASS	SMYD3	intronic	NM_001167740,NM_022743	.	.	.	ENST00000426386.2,ENST00000630181.2,ENST00000490107.5	1q44	.	.	.	.	.	.	.	.	.	.	.	.	.	.	.	.	.	.	.	.	.	.	.	.	.	.	.	.	.	.	.	.	.	.	.
chr1	246215109	.	T	G	.	PASS	SMYD3	intronic	NM_001167740,NM_022743	.	.	.	ENST00000630181.2,ENST00000490107.5	1q44	.	.	.	.	.	.	.	.	.	.	.	.	.	.	.	.	.	.	.	.	.	.	.	.	.	.	.	.	.	.	.	.	.	.	.
chr1	246388225	.	T	G	.	PASS	SMYD3	intronic	NM_001167740,NM_022743	.	.	.	ENST00000403792.7,ENST00000630181.2,ENST00000490107.5	1q44	.	.	.	.	.	.	.	.	.	.	.	.	.	.	.	.	.	.	.	.	.	.	.	.	.	.	.	.	.	.	.	.	.	.	.
chr1	247140479	.	T	G	.	PASS	ZNF124	intronic	NM_001243740,NM_001297567	.	.	.	ENST00000491356.5,ENST00000472531.5	1q44	.	.	Score=16067;Name="441302:L1PREC2(LINE)"	.	.	.	.	.	.	.	.	.	.	.	.	.	.	.	.	.	.	.	.	.	.	.	.	.	.	.	.	.	.	.	.
chr1	247329158	.	T	G	.	PASS	ZNF496	intronic	NM_001329733,NM_032752	.	.	.	ENST00000294753.8	1q44	.	.	.	.	.	.	.	.	.	.	.	.	.	.	.	.	.	.	.	.	.	.	.	.	.	.	.	.	.	.	.	.	.	.	.
chr1	247799637	.	C	G	.	PASS	.	intergenic	NM_012353,NM_001001966	dist=41231;dist=15163	.	.	.	1q44	.	.	Score=1562;Name="442509:L1PA16(LINE)"	.	.	.	.	.	.	.	.	.	.	.	.	.	.	.	.	.	.	.	.	.	.	.	.	.	.	.	.	.	.	.	.
chr1	248003179	.	T	A	.	PASS	OR2L13	intronic	NM_001304535,NM_175911	.	.	.	ENST00000366478.2	1q44	.	.	.	.	.	.	.	.	.	.	.	.	.	.	.	.	.	.	.	.	.	.	.	.	.	.	.	.	.	.	.	.	.	.	.
chr1	248169183	.	T	G	.	PASS	.	intergenic	NM_001004690,NM_001004688	dist=23097;dist=10803	.	.	.	1q44	.	.	Score=28322;Name="443081:L1PA2(LINE)"	.	.	.	.	.	.	.	.	.	.	.	.	.	.	.	.	.	.	.	.	.	.	.	.	.	.	.	.	.	.	.	.
chr1	248183936	.	T	C	.	PASS	.	intergenic	NM_001004688,NM_001004689	dist=2907;dist=19132	.	.	.	1q44	.	.	Score=19896;Name="443092:L1PB1(LINE)"	.	.	.	.	.	.	.	.	.	.	.	.	.	.	.	.	.	.	.	.	.	.	.	.	.	.	.	.	.	.	.	.
chr1	248333455	.	G	A	.	PASS	.	intergenic	NM_001004691,NM_001001918	dist=8887;dist=15320	.	.	.	1q44	.	.	Score=3319;Name="443264:LTR9A1(LTR)"	.	.	.	.	.	.	.	.	.	.	.	.	.	.	.	.	.	.	.	.	.	.	.	.	.	.	.	.	.	.	.	.
chr1	248432833	rs112024104	A	C	.	PASS	.	intergenic	NM_030904,NM_001004136	dist=25729;dist=19965	.	.	.	1q44	.	Score=0.979034;Name=chr1:248632254	Score=2771;Name="443419:HERVK3-int(LTR)"	rs112024104	.	.	.	.	.	.	.	.	.	.	.	.	.	.	.	.	.	.	.	.	.	.	.	.	.	.	.	.	.	.	.
chr1	248432851	rs766068649	G	A	.	PASS	.	intergenic	NM_030904,NM_001004136	dist=25747;dist=19947	.	.	.	1q44	.	Score=0.979034;Name=chr1:248632254	Score=2771;Name="443419:HERVK3-int(LTR)"	rs766068649	.	.	.	.	.	.	.	.	.	.	.	.	.	.	.	.	.	.	.	.	.	.	.	.	.	.	.	.	.	.	.
chr1	248457486	rs28415992	C	T	.	PASS	.	intergenic	NM_001004136,NM_001005495	dist=3714;dist=15865	.	.	.	1q44	.	Score=0.979034;Name=chr1:248632254	.	rs28415992	.	.	.	.	.	.	.	.	.	.	.	.	.	.	.	.	.	.	.	.	.	.	.	.	.	.	.	.	.	.	.
chr1	248933677	.	A	C	.	PASS	.	intergenic	NM_001017434,NONE	dist=14531;dist=NONE	.	.	.	1q44	.	Score=0.985044;Name=chr21:46680533	Score=1781;Name="444174:MSTA1(LTR)"	.	.	.	.	.	.	.	.	.	.	.	.	.	.	.	.	.	.	.	.	.	.	.	.	.	.	.	.	.	.	.	.
chr10	359412	.	T	C	.	PASS	DIP2C	intronic	NM_014974	.	.	.	ENST00000381496.7,ENST00000280886.10	10p15.3	.	.	.	.	.	.	.	.	.	.	.	.	.	.	.	.	.	.	.	.	.	.	.	.	.	.	.	.	.	.	.	.	.	.	.
chr10	1211491	.	C	A	.	PASS	ADARB2	intronic	NM_018702	.	.	.	ENST00000381312.5	10p15.3	.	.	Score=254;Name="445859:L2c(LINE)"	.	.	.	.	.	.	.	.	.	.	.	.	.	.	.	.	.	.	.	.	.	.	.	.	.	.	.	.	.	.	.	.
chr10	1304191	.	A	C	.	PASS	ADARB2	intronic	NM_018702	.	.	.	ENST00000381312.5	10p15.3	.	.	Score=26255;Name="445940:L1PA2(LINE)"	.	.	.	.	.	.	.	.	.	.	.	.	.	.	.	.	.	.	.	.	.	.	.	.	.	.	.	.	.	.	.	.
chr10	1728721	.	G	C	.	PASS	ADARB2	intronic	NM_018702	.	.	.	ENST00000381312.5	10p15.3	.	.	.	.	.	.	.	.	.	.	.	.	.	.	.	.	.	.	.	.	.	.	.	.	.	.	.	.	.	.	.	.	.	.	.
chr10	1734316	.	T	A	.	PASS	ADARB2	intronic	NM_018702	.	.	.	ENST00000381312.5	10p15.3	.	.	Score=18;Name="446393:(T)n(Simple_repeat)"	.	.	.	.	.	.	.	.	.	.	.	.	.	.	.	.	.	.	.	.	.	.	.	.	.	.	.	.	.	.	.	.
chr10	1974415	.	G	C	.	PASS	.	intergenic	NM_018702,NR_040253	dist=236939;dist=31058	.	.	.	10p15.3	.	.	.	.	.	.	.	.	.	.	.	.	.	.	.	.	.	.	.	.	.	.	.	.	.	.	.	.	.	.	.	.	.	.	.
chr10	2230851	.	T	G	.	PASS	.	intergenic	NR_106720,NR_038884	dist=154762;dist=69468	.	.	.	10p15.3	.	.	Score=240;Name="447104:L2c(LINE)"	.	.	.	.	.	.	.	.	.	.	.	.	.	.	.	.	.	.	.	.	.	.	.	.	.	.	.	.	.	.	.	.
chr10	2982496	.	G	C	.	PASS	.	intergenic	NR_136146,NM_001323069	dist=481034;dist=85024	.	.	.	10p15.3	.	.	Score=598;Name="448254:Tigger13a(DNA)"	.	.	.	.	.	.	.	.	.	.	.	.	.	.	.	.	.	.	.	.	.	.	.	.	.	.	.	.	.	.	.	.
chr10	4497377	rs571617476	C	T	.	PASS	.	intergenic	NR_108054,NR_024475	dist=86765;dist=152808	.	.	.	10p15.1	.	.	.	rs571617476	.	.	.	.	.	.	.	.	0.001	.	.	.	0.000199681	.	.	.	.	.	.	.	.	.	.	.	.	.	.	.	.	.	.
chr10	4791469	.	G	T	.	PASS	.	intergenic	NR_024475,NM_001271021	dist=113399;dist=34708	.	.	.	10p15.1	.	.	Score=2685;Name="451073:AluY(SINE)"	.	.	.	.	.	.	.	.	.	.	.	.	.	.	.	.	.	.	.	.	.	.	.	.	.	.	.	.	.	.	.	.
chr10	4955236	.	G	T	.	PASS	.	intergenic	NR_026743,NM_001353	dist=38963;dist=8026	.	.	ENST00000407674.5	10p15.1	.	Score=0.947809;Name=chr10:4984361	Score=420;Name="451342:L1PA15-16(LINE)"	.	.	.	.	.	.	.	.	.	.	.	.	.	.	.	.	.	.	.	.	.	.	.	.	.	.	.	.	.	.	.	.
chr10	7059857	rs200503431	G	C	.	PASS	.	intergenic	NR_038291,NM_001018039	dist=216951;dist=98767	.	.	.	10p14	.	.	Score=28805;Name="455331:L1PA2(LINE)"	rs200503431	.	.	.	.	.	.	.	.	.	.	.	.	.	.	.	.	.	.	.	.	.	.	.	.	.	.	.	.	.	.	.
chr10	7177313	.	T	G	.	PASS	SFMBT2	intronic	NM_001018039,NM_001029880	.	.	.	ENST00000397167.5,ENST00000361972.8	10p14	.	.	.	.	.	.	.	.	.	.	.	.	.	.	.	.	.	.	.	.	.	.	.	.	.	.	.	.	.	.	.	.	.	.	.
chr10	7813377	.	A	C	.	PASS	.	intergenic	NM_001320886,NM_031923	dist=5578;dist=5127	.	.	.	10p14	.	.	Score=19;Name="456660:(CCCCAT)n(Simple_repeat)"	.	.	.	.	.	.	.	.	.	.	.	.	.	.	.	.	.	.	.	.	.	.	.	.	.	.	.	.	.	.	.	.
chr10	8539236	.	T	G	.	PASS	.	intergenic	NR_108058,NR_134492	dist=270931;dist=33511	.	.	.	10p14	.	.	Score=1984;Name="458088:L1MA9(LINE)"	.	.	.	.	.	.	.	.	.	.	.	.	.	.	.	.	.	.	.	.	.	.	.	.	.	.	.	.	.	.	.	.
chr10	8582257	rs10905410	A	C	.	PASS	.	ncRNA_intronic	NR_134492	.	.	.	.	10p14	.	.	Score=31;Name="458175:(AC)n(Simple_repeat)"	rs10905410	.	.	.	.	.	.	.	.	.	.	.	.	.	.	.	.	.	.	.	.	.	.	.	.	.	.	.	.	.	.	.
chr10	9024175	.	G	C	.	PASS	.	intergenic	NR_131944,NR_120635	dist=109579;dist=173191	.	.	.	10p14	.	.	.	.	.	.	.	.	.	.	.	.	.	.	.	.	.	.	.	.	.	.	.	.	.	.	.	.	.	.	.	.	.	.	.
chr10	9400086	.	T	G	.	PASS	.	intergenic	NR_120635,NR_120636	dist=104493;dist=658636	.	.	.	10p14	.	.	.	.	.	.	.	.	.	.	.	.	.	.	.	.	.	.	.	.	.	.	.	.	.	.	.	.	.	.	.	.	.	.	.
chr10	9696629	.	C	T	.	PASS	.	intergenic	NR_120635,NR_120636	dist=401036;dist=362093	.	.	.	10p14	.	.	Score=300;Name="460054:ERVL-E-int(LTR)"	.	.	.	.	.	.	.	.	.	.	.	.	.	.	.	.	.	.	.	.	.	.	.	.	.	.	.	.	.	.	.	.
chr10	10073835	.	T	C	.	PASS	.	intergenic	NR_120636,NR_120637	dist=10333;dist=345703	.	.	.	10p14	.	.	Score=26370;Name="460723:L1PA4(LINE)"	.	.	.	.	.	.	.	.	.	.	.	.	.	.	.	.	.	.	.	.	.	.	.	.	.	.	.	.	.	.	.	.
chr10	10151626	.	C	T	.	PASS	.	intergenic	NR_120636,NR_120637	dist=88124;dist=267912	.	.	.	10p14	.	.	.	.	.	.	.	.	.	.	.	.	.	.	.	.	.	.	.	.	.	.	.	.	.	.	.	.	.	.	.	.	.	.	.
chr10	10418062	.	A	T	.	PASS	.	intergenic	NR_120636,NR_120637	dist=354560;dist=1476	.	.	.	10p14	.	.	Score=295;Name="461332:L2c(LINE)"	.	.	.	.	.	.	.	.	.	.	.	.	.	.	.	.	.	.	.	.	.	.	.	.	.	.	.	.	.	.	.	.
chr10	10458753	.	T	G	.	PASS	LOC101928322	ncRNA_intronic	NR_120637	.	.	.	ENST00000602311.1	10p14	.	.	.	.	.	.	.	.	.	.	.	.	.	.	.	.	.	.	.	.	.	.	.	.	.	.	.	.	.	.	.	.	.	.	.
chr10	10499491	.	T	A	.	PASS	.	intronic	NM_001326317,NM_001326318,NM_001326319,NM_001326320,NM_001326321,NM_001326323	.	.	.	.	10p14	.	.	.	.	.	.	.	.	.	.	.	.	.	.	.	.	.	.	.	.	.	.	.	.	.	.	.	.	.	.	.	.	.	.	.
chr10	10882459	.	C	G	.	PASS	.	intronic	NM_001326317,NM_001326318,NM_001326319,NM_001326320,NM_001326321,NM_001326323,NM_001326324,NM_001326325,NM_001326326,NM_001326327,NM_001326328	.	.	.	.	10p14	.	.	.	.	.	.	.	.	.	.	.	.	.	.	.	.	.	.	.	.	.	.	.	.	.	.	.	.	.	.	.	.	.	.	.
chr10	10884571	.	A	T	.	PASS	.	intronic	NM_001326317,NM_001326318,NM_001326319,NM_001326320,NM_001326321,NM_001326323,NM_001326324,NM_001326325,NM_001326326,NM_001326327,NM_001326328	.	.	.	.	10p14	.	.	.	.	.	.	.	.	.	.	.	.	.	.	.	.	.	.	.	.	.	.	.	.	.	.	.	.	.	.	.	.	.	.	.
chr10	10988298	rs199976487	G	T	.	PASS	.	intronic	NM_001326317,NM_001326318,NM_001326319,NM_001326320,NM_001326321,NM_001326323,NM_001326324,NM_001326325,NM_001326326,NM_001326327,NM_001326328	.	.	.	.	10p14	.	.	Score=5753;Name="462221:L1PB2(LINE)"	rs199976487	.	.	.	.	.	.	.	0.0784	0.0481	0.0179	0.0734	0.0922	0.0609026	.	.	.	.	.	.	.	.	.	.	.	.	.	.	.	.	.	.
chr10	12029971	rs565486647	C	A	.	PASS	UPF2	intronic	NM_015542,NM_080599	.	.	.	ENST00000356352.6,ENST00000357604.9,ENST00000397053.6	10p14	.	.	Score=2209;Name="464066:AluSx(SINE)"	rs565486647	.	.	.	.	.	.	.	0.001	.	.	0.0008	.	0.000399361	.	.	.	.	.	.	.	.	.	.	.	.	.	.	.	.	.	.
chr10	12174102	.	A	C	.	PASS	NUDT5	intronic	NM_001321647,NM_001321648,NM_014142	.	.	.	ENST00000378927.7,ENST00000491614.5,ENST00000378940.7,ENST00000537776.5,ENST00000378937.7	10p14	.	.	Score=2334;Name="464469:AluSg7(SINE)"	.	.	.	.	.	.	.	.	.	.	.	.	.	.	.	.	.	.	.	.	.	.	.	.	.	.	.	.	.	.	.	.
chr10	12349260	.	T	G	.	PASS	.	upstream	NM_020397,NM_153498	.	.	.	.	10p13	.	.	.	.	.	.	.	.	.	.	.	.	.	.	.	.	.	.	.	.	.	.	.	.	.	.	.	.	.	.	.	.	.	.	.
chr10	13034292	.	T	G	.	PASS	CCDC3	intronic	NM_001282658	.	.	.	ENST00000378839.1	10p13	.	.	Score=25785;Name="466385:L1PA5(LINE)"	.	.	.	.	.	.	.	.	.	.	.	.	.	.	.	.	.	.	.	.	.	.	.	.	.	.	.	.	.	.	.	.
chr10	13570613	.	T	A	.	PASS	.	intergenic	NM_152751,NM_003675	dist=67637;dist=16326	.	.	.	10p13	.	.	Score=5429;Name="467605:L1PB3(LINE)"	.	.	.	.	.	.	.	.	.	.	.	.	.	.	.	.	.	.	.	.	.	.	.	.	.	.	.	.	.	.	.	.
chr10	13689570	.	G	T	.	PASS	FRMD4A	intronic	NM_001318336,NM_001318337,NM_001318338,NM_018027	.	.	.	ENST00000358621.8,ENST00000357447.6	10p13	.	.	Score=1596;Name="467806:AluJr(SINE)"	.	.	.	.	.	.	.	.	.	.	.	.	.	.	.	.	.	.	.	.	.	.	.	.	.	.	.	.	.	.	.	.
chr10	14622959	.	G	A	.	PASS	FAM107B	intronic	NM_001282695,NM_031453	.	.	.	ENST00000181796.6	10p13	.	.	Score=1316;Name="469590:Tigger13a(DNA)"	.	.	.	.	.	.	.	.	.	.	.	.	.	.	.	.	.	.	.	.	.	.	.	.	.	.	.	.	.	.	.	.
chr10	14623001	.	C	T	.	PASS	FAM107B	intronic	NM_001282695,NM_031453	.	.	.	ENST00000181796.6	10p13	.	.	Score=1316;Name="469590:Tigger13a(DNA)"	.	.	.	.	.	.	.	.	.	.	.	.	.	.	.	.	.	.	.	.	.	.	.	.	.	.	.	.	.	.	.	.
chr10	14632154	.	C	T	.	PASS	FAM107B	intronic	NM_001282695,NM_031453	.	.	.	ENST00000181796.6	10p13	.	.	Score=2304;Name="469608:AluSx(SINE)"	.	.	.	.	.	.	.	.	.	.	.	.	.	.	.	.	.	.	.	.	.	.	.	.	.	.	.	.	.	.	.	.
chr10	14968436	.	T	G	.	PASS	MEIG1	intronic	NM_001080836	.	.	.	ENST00000407572.5,ENST00000378240.1	10p13	.	.	Score=2148;Name="470325:AluSz(SINE)"	.	.	.	.	.	.	.	.	.	.	.	.	.	.	.	.	.	.	.	.	.	.	.	.	.	.	.	.	.	.	.	.
chr10	15916966	.	C	G	.	PASS	.	intergenic	NM_024948,NM_001261838	dist=56433;dist=519977	.	.	.	10p13	.	.	Score=28679;Name="472165:L1PA2(LINE)"	.	.	.	.	.	.	.	.	.	.	.	.	.	.	.	.	.	.	.	.	.	.	.	.	.	.	.	.	.	.	.	.
chr10	16775419	.	G	T	.	PASS	RSU1	intronic	NM_012425,NM_152724	.	.	.	ENST00000377921.7,ENST00000602389.1,ENST00000345264.9	10p13	.	Score=0.908674;Name=chr10:45114364	.	.	.	.	.	.	.	.	.	.	.	.	.	.	.	.	.	.	.	.	.	.	.	.	.	.	.	.	.	.	.	.	.
chr10	17815417	.	T	C	.	PASS	MRC1	intronic	NM_002438	.	.	.	ENST00000569591.2	10p12.33	.	.	.	.	.	.	.	.	.	.	.	.	.	.	.	.	.	.	.	.	.	.	.	.	.	.	.	.	.	.	.	.	.	.	.
chr10	18962914	rs866535011	G	T	.	PASS	.	intergenic	NM_178815,NM_001142308	dist=284903;dist=85857	.	.	.	10p12.31	.	.	Score=2291;Name="478003:AluSg(SINE)"	rs866535011	.	.	.	.	.	.	.	.	.	.	.	.	.	.	.	.	.	.	.	.	.	.	.	.	.	.	.	.	.	.	.
chr10	19686038	.	C	T	.	PASS	MALRD1	intronic	NM_001142308	.	.	.	ENST00000454679.6	10p12.31	.	.	Score=3830;Name="479240:MER50(LTR)"	.	.	.	.	.	.	.	.	.	.	.	.	.	.	.	.	.	.	.	.	.	.	.	.	.	.	.	.	.	.	.	.
chr10	19891779	.	C	G	.	PASS	PLXDC2	intronic	NM_001282736,NM_032812	.	.	.	ENST00000377242.7,ENST00000377252.4	10p12.31	.	.	.	.	.	.	.	.	.	.	.	.	.	.	.	.	.	.	.	.	.	.	.	.	.	.	.	.	.	.	.	.	.	.	.
chr10	20217747	.	A	G	.	PASS	PLXDC2	intronic	NM_001282736,NM_032812	.	.	.	ENST00000377252.4,ENST00000377242.7	10p12.31	.	.	.	.	.	.	.	.	.	.	.	.	.	.	.	.	.	.	.	.	.	.	.	.	.	.	.	.	.	.	.	.	.	.	.
chr10	20553500	.	A	T	.	PASS	.	intergenic	NR_039822,NM_213569	dist=1454;dist=226474	.	.	.	10p12.31	.	.	Score=847;Name="480730:MLT1L(LTR)"	.	.	.	.	.	.	.	.	.	.	.	.	.	.	.	.	.	.	.	.	.	.	.	.	.	.	.	.	.	.	.	.
chr10	21838333	.	G	C	.	PASS	DNAJC1	intronic	NM_022365	.	.	.	ENST00000376980.7	10p12.31	.	.	Score=9522;Name="483359:SVA_C(Retroposon)"	.	.	.	.	.	.	.	.	.	.	.	.	.	.	.	.	.	.	.	.	.	.	.	.	.	.	.	.	.	.	.	.
chr10	22128292	.	C	G	.	PASS	.	intergenic	NM_022365,NM_001199938	dist=124571;dist=80522	.	.	.	10p12.31	.	.	Score=28596;Name="483917:L1PA2(LINE)"	.	.	.	.	.	.	.	.	.	.	.	.	.	.	.	.	.	.	.	.	.	.	.	.	.	.	.	.	.	.	.	.
chr10	22128315	.	A	G	.	PASS	.	intergenic	NM_022365,NM_001199938	dist=124594;dist=80499	.	.	.	10p12.31	.	.	Score=28596;Name="483917:L1PA2(LINE)"	.	.	.	.	.	.	.	.	.	.	.	.	.	.	.	.	.	.	.	.	.	.	.	.	.	.	.	.	.	.	.	.
chr10	23085057	.	A	C	.	PASS	.	intergenic	NM_173081,NM_012228	dist=46534;dist=10441	.	.	.	10p12.2	.	.	Score=3555;Name="485626:L1MA7(LINE)"	.	.	.	.	.	.	.	.	.	.	.	.	.	.	.	.	.	.	.	.	.	.	.	.	.	.	.	.	.	.	.	.
chr10	23567246	.	T	G	.	PASS	.	intergenic	NM_001145373,NM_001098500	dist=124865;dist=127500	.	.	.	10p12.2	.	.	.	.	.	.	.	.	.	.	.	.	.	.	.	.	.	.	.	.	.	.	.	.	.	.	.	.	.	.	.	.	.	.	.
chr10	23722860	.	C	T	.	PASS	KIAA1217	intronic	NM_001098500	.	.	.	ENST00000376462.5	10p12.2	.	.	.	.	.	.	.	.	.	.	.	.	.	.	.	.	.	.	.	.	.	.	.	.	.	.	.	.	.	.	.	.	.	.	.
chr10	23793306	.	T	G	.	PASS	KIAA1217	intronic	NM_001098500	.	.	.	ENST00000376462.5	10p12.2	.	.	.	.	.	.	.	.	.	.	.	.	.	.	.	.	.	.	.	.	.	.	.	.	.	.	.	.	.	.	.	.	.	.	.
chr10	23839469	.	C	A	.	PASS	KIAA1217	intronic	NM_001098500	.	.	.	ENST00000376462.5	10p12.2	.	.	Score=614;Name="487190:L1M6(LINE)"	.	.	.	.	.	.	.	.	.	.	.	.	.	.	.	.	.	.	.	.	.	.	.	.	.	.	.	.	.	.	.	.
chr10	24438070	rs534669946	A	T	.	PASS	KIAA1217	intronic	NM_001098500,NM_001282767,NM_001282768,NM_019590	.	.	.	ENST00000376462.5,ENST00000430453.6,ENST00000376454.7,ENST00000376452.7,ENST00000458595.5	10p12.1	.	.	.	rs534669946	.	.	.	.	.	.	.	.	.	.	0.0008	0.0014	0.000399361	.	.	.	.	.	.	.	.	.	.	.	.	.	.	.	.	.	.
chr10	24762157	rs188045199	A	T	.	PASS	.	intergenic	NM_020824,NM_020200	dist=38489;dist=86450	.	.	.	10p12.1	.	.	.	rs188045199	.	.	.	.	.	.	.	0.003	0.0041	0.003	0.0053	0.0043	0.00399361	.	.	.	.	.	.	.	.	.	.	.	.	.	.	.	.	.	.
chr10	25023365	.	T	G	.	PASS	THNSL1	exonic	NM_024838	.	missense SNV	THNSL1:NM_024838:exon3:c.T142G:p.S48A	ENST00000615958.4,ENST00000524413.5,ENST00000376356.4	10p12.1	.	.	.	.	.	.	.	.	.	.	.	.	.	.	.	.	.	.	.	.	.	.	.	.	.	.	.	.	.	.	.	.	.	.	.
chr10	25482577	.	T	C	.	PASS	GPR158	intronic	NM_020752	.	.	.	ENST00000376351.3	10p12.1	.	.	.	.	.	.	.	.	.	.	.	.	.	.	.	.	.	.	.	.	.	.	.	.	.	.	.	.	.	.	.	.	.	.	.
chr10	25531081	.	T	G	.	PASS	GPR158	intronic	NM_020752	.	.	.	ENST00000376351.3	10p12.1	.	.	.	.	.	.	.	.	.	.	.	.	.	.	.	.	.	.	.	.	.	.	.	.	.	.	.	.	.	.	.	.	.	.	.
chr10	25653396	.	T	A	.	PASS	LINC00836	ncRNA_intronic	NR_108067,NR_108068,NR_108069	.	.	.	ENST00000628620.1,ENST00000626230.2,ENST00000625325.2	10p12.1	.	.	Score=2015;Name="490672:L1ME1(LINE)"	.	.	.	.	.	.	.	.	.	.	.	.	.	.	.	.	.	.	.	.	.	.	.	.	.	.	.	.	.	.	.	.
chr10	25723860	.	A	C	.	PASS	LINC00836	ncRNA_intronic	NR_108067,NR_108068	.	.	.	ENST00000625325.2,ENST00000626230.2	10p12.1	.	.	.	.	.	.	.	.	.	.	.	.	.	.	.	.	.	.	.	.	.	.	.	.	.	.	.	.	.	.	.	.	.	.	.
chr10	25812559	.	A	G	.	PASS	.	intergenic	NR_108067,NR_120650	dist=79624;dist=111819	.	.	.	10p12.1	.	.	.	.	.	.	.	.	.	.	.	.	.	.	.	.	.	.	.	.	.	.	.	.	.	.	.	.	.	.	.	.	.	.	.
chr10	25892622	.	T	C	.	PASS	.	intergenic	NR_108067,NR_120650	dist=159687;dist=31756	.	.	.	10p12.1	.	.	.	.	.	.	.	.	.	.	.	.	.	.	.	.	.	.	.	.	.	.	.	.	.	.	.	.	.	.	.	.	.	.	.
chr10	25923209	.	G	A	.	PASS	.	intergenic	NR_108067,NR_120650	dist=190274;dist=1169	.	.	.	10p12.1	.	.	.	.	.	.	.	.	.	.	.	.	.	.	.	.	.	.	.	.	.	.	.	.	.	.	.	.	.	.	.	.	.	.	.
chr10	26250949	.	A	C	.	PASS	GAD2	intronic	NM_000818,NM_001134366	.	.	.	ENST00000259271.7,ENST00000376261.7	10p12.1	.	.	Score=2274;Name="491722:AluY(SINE)"	.	.	.	.	.	.	.	.	.	.	.	.	.	.	.	.	.	.	.	.	.	.	.	.	.	.	.	.	.	.	.	.
chr10	26251965	rs577424603	A	C	.	PASS	GAD2	intronic	NM_000818,NM_001134366	.	.	.	ENST00000376261.7,ENST00000259271.7	10p12.1	.	.	.	rs577424603	.	.	.	.	.	.	.	.	.	0.001	.	.	0.000199681	.	.	.	.	.	.	.	.	.	.	.	.	.	.	.	.	.	.
chr10	26882391	.	G	T	.	PASS	.	intergenic	NM_005470,NR_026795	dist=21304;dist=48815	.	.	.	10p12.1	.	Score=0.907636;Name=chr10:36878336	Score=2596;Name="493113:AluY(SINE)"	.	.	.	.	.	.	.	.	.	.	.	.	.	.	.	.	.	.	.	.	.	.	.	.	.	.	.	.	.	.	.	.
chr10	28157715	.	C	T	.	PASS	MPP7	intronic	NM_001318170,NM_173496	.	.	.	ENST00000375732.5,ENST00000337532.9,ENST00000375719.7	10p12.1	.	.	Score=284;Name="495570:L2a(LINE)"	.	.	.	.	.	.	.	.	.	.	.	.	.	.	.	.	.	.	.	.	.	.	.	.	.	.	.	.	.	.	.	.
chr10	28959819	.	A	G	.	PASS	.	intergenic	NM_001278522,NM_032517	dist=77922;dist=329242	.	.	.	10p12.1	.	.	.	.	.	.	.	.	.	.	.	.	.	.	.	.	.	.	.	.	.	.	.	.	.	.	.	.	.	.	.	.	.	.	.
chr10	30193405	.	T	A	.	PASS	.	intergenic	NM_001350022,NR_120653	dist=77911;dist=18447	.	.	.	10p11.23	.	.	Score=14852;Name="499843:Tigger1(DNA)"	.	.	.	.	.	.	.	.	.	.	.	.	.	.	.	.	.	.	.	.	.	.	.	.	.	.	.	.	.	.	.	.
chr10	30699896	.	A	G	.	PASS	SVILP1	ncRNA_intronic	NR_036438	.	.	.	.	10p11.23	.	Score=0.91997;Name=chr10:29478975	.	.	.	.	.	.	.	.	.	.	.	.	.	.	.	.	.	.	.	.	.	.	.	.	.	.	.	.	.	.	.	.	.
chr10	31652148	.	T	C	.	PASS	.	intergenic	NM_001323643,NM_001270699	dist=122334;dist=153250	.	.	.	10p11.22	.	.	Score=1165;Name="502670:L1ME3Cz(LINE)"	.	.	.	.	.	.	.	.	.	.	.	.	.	.	.	.	.	.	.	.	.	.	.	.	.	.	.	.	.	.	.	.
chr10	31721726	.	C	T	.	PASS	.	intergenic	NM_001323643,NM_001270699	dist=191912;dist=83672	.	.	.	10p11.22	.	.	.	.	.	.	.	.	.	.	.	.	.	.	.	.	.	.	.	.	.	.	.	.	.	.	.	.	.	.	.	.	.	.	.
chr10	31777256	.	C	T	.	PASS	.	intergenic	NM_001323643,NM_001270699	dist=247442;dist=28142	.	.	.	10p11.22	.	.	Score=1512;Name="502914:AluJb(SINE)"	.	.	.	.	.	.	.	.	.	.	.	.	.	.	.	.	.	.	.	.	.	.	.	.	.	.	.	.	.	.	.	.
chr10	32250849	.	A	C	.	PASS	.	intergenic	NM_004521,NM_001272019	dist=194406;dist=16867	.	.	.	10p11.22	.	.	Score=1501;Name="504033:L1MB3(LINE)"	.	.	.	.	.	.	.	.	.	.	.	.	.	.	.	.	.	.	.	.	.	.	.	.	.	.	.	.	.	.	.	.
chr10	32554586	.	T	C	.	PASS	CCDC7	intronic	NM_001026383,NM_001321115,NM_145023	.	.	.	ENST00000277657.10,ENST00000572165.3,ENST00000362006.9	10p11.22	.	.	Score=23491;Name="504611:L1PB1(LINE)"	.	.	.	.	.	.	.	.	.	.	.	.	.	.	.	.	.	.	.	.	.	.	.	.	.	.	.	.	.	.	.	.
chr10	32845796	rs181166524	T	C	.	PASS	CCDC7	intronic	NM_001321115	.	.	.	ENST00000375030.6,ENST00000375028.6,ENST00000375025.8	10p11.22	.	.	Score=44;Name="505012:(AC)n(Simple_repeat)"	rs181166524	.	.	.	.	.	.	.	.	.	.	.	.	.	.	.	.	.	.	.	.	.	.	.	.	.	.	.	.	.	.	.
chr10	32958194	.	T	G	.	PASS	ITGB1	UTR5	NM_002211	NM_002211:c.-22636A>C	.	.	ENST00000302278.7	10p11.22	.	.	.	.	.	.	.	.	.	.	.	.	.	.	.	.	.	.	.	.	.	.	.	.	.	.	.	.	.	.	.	.	.	.	.
chr10	35097866	.	T	G	.	PASS	.	intergenic	NM_001198777,NM_001267562	dist=7224;dist=28975	.	.	.	10p11.21	.	.	Score=1910;Name="509149:AluSz6(SINE)"	.	.	.	.	.	.	.	.	.	.	.	.	.	.	.	.	.	.	.	.	.	.	.	.	.	.	.	.	.	.	.	.
chr10	36584043	rs200259015	C	T	.	PASS	.	intergenic	NR_110138,NM_052997	dist=783123;dist=541814	.	.	.	10p11.21	.	.	Score=145;Name="511872:(TTCC)n(Simple_repeat)"	rs200259015	.	.	.	.	.	.	.	.	.	.	.	.	.	.	.	.	.	.	.	.	.	.	.	.	.	.	.	.	.	.	.
chr10	37160301	.	T	A	.	PASS	ANKRD30A	intronic	NM_052997	.	.	.	ENST00000611781.4,ENST00000361713.1,ENST00000602533.5,ENST00000374660.5	10p11.21	.	Score=0.960377;Name=chr10:37174603	.	.	.	.	.	.	.	.	.	.	.	.	.	.	.	.	.	.	.	.	.	.	.	.	.	.	.	.	.	.	.	.	.
chr10	37316669	.	C	A	.	PASS	LINC00993	ncRNA_intronic	NR_104061	.	.	.	ENST00000602533.5,ENST00000426471.5	10p11.21	.	.	Score=4991;Name="513211:LTR14C(LTR)"	.	.	.	.	.	.	.	.	.	.	.	.	.	.	.	.	.	.	.	.	.	.	.	.	.	.	.	.	.	.	.	.
chr10	37899393	.	T	C	.	PASS	.	intergenic	NM_001267597,NM_001329652	dist=41309;dist=50179	.	.	.	10p11.21	.	.	Score=27859;Name="514277:L1PA2(LINE)"	.	.	.	.	.	.	.	.	.	.	.	.	.	.	.	.	.	.	.	.	.	.	.	.	.	.	.	.	.	.	.	.
chr10	38642062	rs375532027	T	C	.	PASS	.	intergenic	NR_024497,NR_045000	dist=189909;dist=54534	.	.	.	10p11.1	.	Score=0.977607;Name=chr10:42244266	.	rs375532027	.	.	.	.	.	.	.	.	.	.	.	.	.	.	.	.	.	.	.	.	.	.	.	.	.	.	.	.	.	.	.
chr10	38658950	.	T	C	.	PASS	.	intergenic	NR_024497,NR_045000	dist=206797;dist=37646	.	.	.	10p11.1	.	Score=0.977607;Name=chr10:42244266	Score=3121;Name="515545:THE1D-int(LTR)"	.	.	.	.	.	.	.	.	.	.	.	.	.	.	.	.	.	.	.	.	.	.	.	.	.	.	.	.	.	.	.	.
chr10	38922694	.	T	A	.	PASS	.	intergenic	NR_045000,NONE	dist=224454;dist=NONE	.	.	.	10p11.1	.	Score=0.960001;Name=chr17:26936758	.	.	.	.	.	.	.	.	.	.	.	.	.	.	.	.	.	.	.	.	.	.	.	.	.	.	.	.	.	.	.	.	.
chr10	38952017	.	G	A	.	PASS	.	intergenic	NR_045000,NONE	dist=253777;dist=NONE	.	.	.	10p11.1	.	Score=0.960001;Name=chr17:26936758	.	.	.	.	.	.	.	.	.	.	.	.	.	.	.	.	.	.	.	.	.	.	.	.	.	.	.	.	.	.	.	.	.
chr10	39070626	.	T	A	.	PASS	.	intergenic	NR_045000,NONE	dist=372386;dist=NONE	.	.	.	10p11.1	.	.	Score=1182;Name="515911:ALR/Alpha(Satellite)"	.	.	.	.	.	.	.	.	.	.	.	.	.	.	.	.	.	.	.	.	.	.	.	.	.	.	.	.	.	.	.	.
chr10	39268216	.	T	C	.	PASS	.	intergenic	NR_045000,NONE	dist=569976;dist=NONE	.	.	.	10p11.1	.	.	Score=1215;Name="515972:ALR/Alpha(Satellite)"	.	.	.	.	.	.	.	.	.	.	.	.	.	.	.	.	.	.	.	.	.	.	.	.	.	.	.	.	.	.	.	.
chr10	39453052	.	C	A	.	PASS	.	intergenic	NR_045000,NONE	dist=754812;dist=NONE	.	.	.	10p11.1	.	.	Score=1143;Name="515999:ALR/Alpha(Satellite)"	.	.	.	.	.	.	.	.	.	.	.	.	.	.	.	.	.	.	.	.	.	.	.	.	.	.	.	.	.	.	.	.
chr10	40000200	.	G	A	.	PASS	.	intergenic	NR_045000,NONE	dist=1301960;dist=NONE	.	.	.	10q11.1	.	.	Score=1496;Name="516044:ALR/Alpha(Satellite)"	.	.	.	.	.	.	.	.	.	.	.	.	.	.	.	.	.	.	.	.	.	.	.	.	.	.	.	.	.	.	.	.
chr10	40024293	.	C	G	.	PASS	.	intergenic	NR_045000,NONE	dist=1326053;dist=NONE	.	.	.	10q11.1	.	.	Score=1496;Name="516044:ALR/Alpha(Satellite)"	.	.	.	.	.	.	.	.	.	.	.	.	.	.	.	.	.	.	.	.	.	.	.	.	.	.	.	.	.	.	.	.
chr10	40099742	.	T	G	.	PASS	.	intergenic	NR_045000,NONE	dist=1401502;dist=NONE	.	.	.	10q11.1	.	.	Score=1496;Name="516044:ALR/Alpha(Satellite)"	.	.	.	.	.	.	.	.	.	.	.	.	.	.	.	.	.	.	.	.	.	.	.	.	.	.	.	.	.	.	.	.
chr10	40278252	.	A	G	.	PASS	.	intergenic	NR_045000,NONE	dist=1580012;dist=NONE	.	.	.	10q11.1	.	.	Score=1496;Name="516044:ALR/Alpha(Satellite)"	.	.	.	.	.	.	.	.	.	.	.	.	.	.	.	.	.	.	.	.	.	.	.	.	.	.	.	.	.	.	.	.
chr10	40798916	.	G	A	.	PASS	.	intergenic	NONE,NR_024380	dist=NONE;dist=1532950	.	.	.	10q11.1	.	.	Score=1460;Name="516056:ALR/Alpha(Satellite)"	.	.	.	.	.	.	.	.	.	.	.	.	.	.	.	.	.	.	.	.	.	.	.	.	.	.	.	.	.	.	.	.
chr10	40798954	.	T	G	.	PASS	.	intergenic	NONE,NR_024380	dist=NONE;dist=1532912	.	.	.	10q11.1	.	.	Score=1460;Name="516056:ALR/Alpha(Satellite)"	.	.	.	.	.	.	.	.	.	.	.	.	.	.	.	.	.	.	.	.	.	.	.	.	.	.	.	.	.	.	.	.
chr10	40827974	.	T	C	.	PASS	.	intergenic	NONE,NR_024380	dist=NONE;dist=1503892	.	.	.	10q11.1	.	.	Score=1460;Name="516056:ALR/Alpha(Satellite)"	.	.	.	.	.	.	.	.	.	.	.	.	.	.	.	.	.	.	.	.	.	.	.	.	.	.	.	.	.	.	.	.
chr10	40879168	.	C	A	.	PASS	.	intergenic	NONE,NR_024380	dist=NONE;dist=1452698	.	.	.	10q11.1	.	.	Score=1460;Name="516056:ALR/Alpha(Satellite)"	.	.	.	.	.	.	.	.	.	.	.	.	.	.	.	.	.	.	.	.	.	.	.	.	.	.	.	.	.	.	.	.
chr10	40955629	.	C	G	.	PASS	.	intergenic	NONE,NR_024380	dist=NONE;dist=1376237	.	.	.	10q11.1	.	.	Score=1460;Name="516058:ALR/Alpha(Satellite)"	.	.	.	.	.	.	.	.	.	.	.	.	.	.	.	.	.	.	.	.	.	.	.	.	.	.	.	.	.	.	.	.
chr10	41460998	.	A	C	.	PASS	.	intergenic	NONE,NR_024380	dist=NONE;dist=870868	.	.	.	10q11.1	.	.	Score=1485;Name="516059:ALR/Alpha(Satellite)"	.	.	.	.	.	.	.	.	.	.	.	.	.	.	.	.	.	.	.	.	.	.	.	.	.	.	.	.	.	.	.	.
chr10	41528973	.	G	A	.	PASS	.	intergenic	NONE,NR_024380	dist=NONE;dist=802893	.	.	.	10q11.1	.	.	Score=1422;Name="516061:ALR/Alpha(Satellite)"	.	.	.	.	.	.	.	.	.	.	.	.	.	.	.	.	.	.	.	.	.	.	.	.	.	.	.	.	.	.	.	.
chr10	41540283	.	C	G	.	PASS	.	intergenic	NONE,NR_024380	dist=NONE;dist=791583	.	.	.	10q11.1	.	.	Score=1422;Name="516061:ALR/Alpha(Satellite)"	.	.	.	.	.	.	.	.	.	.	.	.	.	.	.	.	.	.	.	.	.	.	.	.	.	.	.	.	.	.	.	.
chr10	41540346	.	T	C	.	PASS	.	intergenic	NONE,NR_024380	dist=NONE;dist=791520	.	.	.	10q11.1	.	.	Score=1422;Name="516061:ALR/Alpha(Satellite)"	.	.	.	.	.	.	.	.	.	.	.	.	.	.	.	.	.	.	.	.	.	.	.	.	.	.	.	.	.	.	.	.
chr10	41571910	.	C	A	.	PASS	.	intergenic	NONE,NR_024380	dist=NONE;dist=759956	.	.	.	10q11.1	.	.	Score=1436;Name="516062:ALR/Alpha(Satellite)"	.	.	.	.	.	.	.	.	.	.	.	.	.	.	.	.	.	.	.	.	.	.	.	.	.	.	.	.	.	.	.	.
chr10	41730885	.	A	G	.	PASS	.	intergenic	NONE,NR_024380	dist=NONE;dist=600981	.	.	.	10q11.21	.	.	Score=1219;Name="516068:ALR/Alpha(Satellite)"	.	.	.	.	.	.	.	.	.	.	.	.	.	.	.	.	.	.	.	.	.	.	.	.	.	.	.	.	.	.	.	.
chr10	42176705	rs201537071	C	G	.	PASS	.	intergenic	NONE,NR_024380	dist=NONE;dist=155161	.	.	.	10q11.21	.	Score=0.965878;Name=chr16:32478736	.	rs201537071	.	.	.	.	.	.	.	.	.	.	.	.	.	.	.	.	.	.	.	.	.	.	.	.	.	.	.	.	.	.	.
chr10	42267076	.	C	T	.	PASS	.	intergenic	NONE,NR_024380	dist=NONE;dist=64790	.	.	.	10q11.21	.	Score=0.977607;Name=chr10:38622992	Score=4722;Name="516339:L1M4c(LINE)"	.	.	.	.	.	.	.	.	.	.	.	.	.	.	.	.	.	.	.	.	.	.	.	.	.	.	.	.	.	.	.	.
chr10	42690907	rs879278999	T	C	.	PASS	LINC01518	ncRNA_intronic	NR_120656,NR_120657,NR_120658,NR_120659	.	.	.	ENST00000411439.1	10q11.21	.	.	.	rs879278999	.	.	.	.	.	.	.	.	.	.	.	.	.	.	.	.	.	.	.	.	.	.	.	.	.	.	.	.	.	.	.
chr10	43751010	.	C	A	.	PASS	.	intergenic	NR_038867,NR_134483	dist=76311;dist=26556	.	.	.	10q11.21	.	.	.	.	.	.	.	.	.	.	.	.	.	.	.	.	.	.	.	.	.	.	.	.	.	.	.	.	.	.	.	.	.	.	.
chr10	43976881	.	C	A	.	PASS	.	ncRNA_intronic	NR_136147	.	.	.	.	10q11.21	.	.	.	.	.	.	.	.	.	.	.	.	.	.	.	.	.	.	.	.	.	.	.	.	.	.	.	.	.	.	.	.	.	.	.
chr10	45011002	.	T	C	.	PASS	.	intergenic	NM_006963,NR_024472	dist=5673;dist=88474	.	.	.	10q11.21	.	.	Score=27380;Name="520883:L1PA3(LINE)"	.	.	.	.	.	.	.	.	.	.	.	.	.	.	.	.	.	.	.	.	.	.	.	.	.	.	.	.	.	.	.	.
chr10	45045268	rs891731381	C	A	.	PASS	.	intergenic	NM_006963,NR_024472	dist=39939;dist=54208	.	.	ENST00000599308.3	10q11.21	.	.	Score=768;Name="520943:L1MCa(LINE)"	rs891731381	.	.	.	.	.	.	.	.	.	.	.	.	.	.	.	.	.	.	.	.	.	.	.	.	.	.	.	.	.	.	.
chr10	45402825	.	C	G	.	PASS	ALOX5	intronic	NM_000698,NM_001256153,NM_001256154,NM_001320861,NM_001320862	.	.	.	ENST00000374391.6,ENST00000542434.5,ENST00000612635.4	10q11.21	.	.	Score=1225;Name="521493:L1ME3B(LINE)"	.	.	.	.	.	.	.	.	.	.	.	.	.	.	.	.	.	.	.	.	.	.	.	.	.	.	.	.	.	.	.	.
chr10	45680655	rs778384318	T	A	.	PASS	.	intergenic	NM_001282906,NM_001330074	dist=7842;dist=46545	.	.	.	10q11.22	.	Score=0.986965;Name=chr10:46108290	.	rs778384318	.	.	.	.	.	.	.	.	.	.	.	.	.	.	.	.	.	.	.	.	.	.	.	.	.	.	.	.	.	.	.
chr10	45784319	.	C	T	.	PASS	FAM21C	intronic	NM_001169106,NM_001169107,NM_001330074,NM_015262	.	.	.	ENST00000537517.5,ENST00000540872.5,ENST00000336378.8,ENST00000623400.3,ENST00000374362.6,ENST00000359860.7	10q11.22	.	Score=0.984665;Name=chr10:50047154	Score=63;Name="522225:(TA)n(Simple_repeat)"	.	.	.	.	.	.	.	.	.	.	.	.	.	.	.	.	.	.	.	.	.	.	.	.	.	.	.	.	.	.	.	.
chr10	46155601	rs2611443	T	C	.	PASS	.	intergenic	NR_126580,NR_103827	dist=23923;dist=63424	.	.	.	10q11.22	.	Score=0.990982;Name=chr10:46815166	Score=2784;Name="523019:MLT1F-int(LTR)"	rs2611443	.	.	.	.	.	.	.	.	.	.	.	.	.	.	.	.	.	.	.	.	.	.	.	.	.	.	.	.	.	.	.
chr10	46229321	.	C	G	.	PASS	ANTXRLP1	ncRNA_intronic	NR_103827,NR_103828	.	.	.	.	10q11.22	.	.	Score=546;Name="523152:L1PB4(LINE)"	.	.	.	.	.	.	.	.	.	.	.	.	.	.	.	.	.	.	.	.	.	.	.	.	.	.	.	.	.	.	.	.
chr10	46766024	.	C	T	.	PASS	GLUD1P7	ncRNA_intronic	NR_111968	.	.	.	.	10q11.22	.	Score=0.992011;Name=chr10:47500009	Score=2496;Name="524176:AluSg4(SINE)"	.	.	.	.	.	.	.	.	.	.	.	.	.	.	.	.	.	.	.	.	.	.	.	.	.	.	.	.	.	.	.	.
chr10	46803373	rs78820995	A	G	.	PASS	BMS1P5	ncRNA_intronic	NR_003611	.	.	.	.	10q11.22	.	Score=0.992011;Name=chr10:47500009	.	rs78820995	.	.	.	.	.	.	.	.	.	.	.	.	.	.	.	.	.	.	.	.	.	.	.	.	.	.	.	.	.	.	.
chr10	47524164	.	G	A	.	PASS	.	upstream	NM_001190810	.	.	.	ENST00000413193.2,ENST00000605970.5	10q11.22	.	Score=0.99423;Name=chr10:47988908	.	.	.	.	.	.	.	.	.	.	.	.	.	.	.	.	.	.	.	.	.	.	.	.	.	.	.	.	.	.	.	.	.
chr10	47576331	.	G	A	.	PASS	.	intergenic	NR_024495,NR_033407	dist=22808;dist=4340	.	.	.	10q11.22	.	Score=0.992011;Name=chr10:46561416	Score=923;Name="525563:L1M4(LINE)"	.	.	.	.	.	.	.	.	.	.	.	.	.	.	.	.	.	.	.	.	.	.	.	.	.	.	.	.	.	.	.	.
chr10	47613810	rs61844782	G	C	.	PASS	.	intergenic	NR_033407,NR_027634	dist=30391;dist=75890	.	.	.	10q11.22	.	Score=0.992011;Name=chr10:46561416	Score=1924;Name="525625:MER1B(DNA)"	rs61844782	.	.	.	.	.	.	.	.	.	.	.	.	.	.	.	.	.	.	.	.	.	.	.	.	.	.	.	.	.	.	.
chr10	47733974	rs374963304	C	G	.	PASS	.	intergenic	NR_027634,NR_134489	dist=2756;dist=9725	.	.	.	10q11.22	.	Score=0.992011;Name=chr10:46561416	.	rs374963304	.	.	.	.	.	.	.	.	.	.	.	.	.	.	.	.	.	.	.	.	.	.	.	.	.	.	.	.	.	.	.
chr10	48031373	rs782112615	T	C	.	PASS	AGAP12P	ncRNA_intronic	NR_029396	.	.	.	.	10q11.22	.	Score=0.99423;Name=chr10:47481141	.	rs782112615	.	.	.	.	.	.	.	.	.	.	.	.	.	.	0.1826	0.1146	0.1212	0.041	0.1934	0.2267	0.2221	0.1555	0.1172	0.134	0.0743	0.1117	0.0659	0.0208	0.153	0.1484	0.1594
chr10	48170016	.	G	C	.	PASS	FRMPD2	intronic	NM_001018071,NM_001042512,NM_001318191	.	.	.	ENST00000305531.3,ENST00000474573.5,ENST00000374201.7	10q11.22	.	Score=0.996117;Name=chr10:46870207	.	.	.	.	.	.	.	.	.	.	.	.	.	.	.	.	.	.	.	.	.	.	.	.	.	.	.	.	.	.	.	.	.
chr10	49042125	.	A	C	.	PASS	VSTM4	intronic	NM_001031746	.	.	.	ENST00000332853.8	10q11.23	.	.	.	.	.	.	.	.	.	.	.	.	.	.	.	.	.	.	.	.	.	.	.	.	.	.	.	.	.	.	.	.	.	.	.
chr10	50167464	rs2137566	T	C	.	PASS	.	intergenic	NM_001291398,NM_001143974	dist=33955;dist=19776	.	.	.	10q11.23	.	Score=0.988537;Name=chr10:50741163	.	rs2137566	.	.	.	.	.	.	.	.	.	.	.	.	.	.	.	.	.	.	.	.	.	.	.	.	.	.	.	.	.	.	.
chr10	51696814	.	C	T	.	PASS	CSTF2T	UTR3	NM_015235	NM_015235:c.*885G>A	.	.	ENST00000331173.5,ENST00000373980.8,ENST00000373985.5	10q21.1	.	.	.	.	.	.	.	.	.	.	.	.	.	.	.	.	.	.	.	.	.	.	.	.	.	.	.	.	.	.	.	.	.	.	.
chr10	52356225	rs11001749	T	A	.	PASS	.	intergenic	NM_012242,NR_120641	dist=38568;dist=94652	.	.	.	10q21.1	.	.	Score=29;Name="533509:(TC)n(Simple_repeat)"	rs11001749	.	.	.	.	.	.	.	0.4722	0.3108	0.0994	0.4138	0.2032	0.313099	.	.	.	.	.	.	.	.	.	.	.	.	.	.	.	.	.	.
chr10	52835194	rs11003200	T	A	.	PASS	.	intergenic	NM_000242,NM_001142772	dist=63494;dist=967577	.	.	.	10q21.1	.	.	Score=581;Name="534276:(AT)n(Simple_repeat)"	rs11003200	.	.	.	.	.	.	.	.	.	.	.	.	.	.	.	.	.	.	.	.	.	.	.	.	.	.	.	.	.	.	.
chr10	52964424	.	T	G	.	PASS	.	intergenic	NM_000242,NM_001142772	dist=192724;dist=838347	.	.	.	10q21.1	.	.	Score=7410;Name="534476:MER52A(LTR)"	.	.	.	.	.	.	.	.	.	.	.	.	.	.	.	.	.	.	.	.	.	.	.	.	.	.	.	.	.	.	.	.
chr10	53165974	.	G	C	.	PASS	.	intergenic	NM_000242,NM_001142772	dist=394274;dist=636797	.	.	.	10q21.1	.	.	.	.	.	.	.	.	.	.	.	.	.	.	.	.	.	.	.	.	.	.	.	.	.	.	.	.	.	.	.	.	.	.	.
chr10	53199803	.	A	C	.	PASS	.	intergenic	NM_000242,NM_001142772	dist=428103;dist=602968	.	.	.	10q21.1	.	.	Score=4627;Name="534866:L1P1(LINE)"	.	.	.	.	.	.	.	.	.	.	.	.	.	.	.	.	.	.	.	.	.	.	.	.	.	.	.	.	.	.	.	.
chr10	53199806	.	C	T	.	PASS	.	intergenic	NM_000242,NM_001142772	dist=428106;dist=602965	.	.	.	10q21.1	.	.	Score=4627;Name="534866:L1P1(LINE)"	.	.	.	.	.	.	.	.	.	.	.	.	.	.	.	.	.	.	.	.	.	.	.	.	.	.	.	.	.	.	.	.
chr10	53244314	.	C	T	.	PASS	.	intergenic	NM_000242,NM_001142772	dist=472614;dist=558457	.	.	.	10q21.1	.	.	Score=12;Name="534932:(ACATAA)n(Simple_repeat)"	.	.	.	.	.	.	.	.	.	.	.	.	.	.	.	.	.	.	.	.	.	.	.	.	.	.	.	.	.	.	.	.
chr10	54543901	.	G	C	.	PASS	PCDH15	ncRNA_intronic	NR_134503	.	.	.	ENST00000395433.5,ENST00000437009.5,ENST00000395445.5,ENST00000614895.4,ENST00000617271.4,ENST00000621708.4,ENST00000395438.5,ENST00000622048.4,ENST00000495484.5,ENST00000414778.5,ENST00000361849.7,ENST00000617051.4,ENST00000373957.7,ENST00000612394.4,ENST00000422842.1,ENST00000395446.5,ENST00000395432.6,ENST00000409834.5,ENST00000613657.4,ENST00000395442.5,ENST00000320301.10,ENST00000373955.5,EN…	10q21.1	.	.	Score=2232;Name="536958:MER65C(LTR)"	.	.	.	.	.	.	.	.	.	.	.	.	.	.	.	.	.	.	.	.	.	.	.	.	.	.	.	.	.	.	.	.
chr10	55255404	.	A	G	.	PASS	.	intergenic	NM_001142772,NM_001190478	dist=454113;dist=343586	.	.	ENST00000457975.2	10q21.1	.	.	Score=7445;Name="538025:L1PA4(LINE)"	.	.	.	.	.	.	.	.	.	.	.	.	.	.	.	.	.	.	.	.	.	.	.	.	.	.	.	.	.	.	.	.
chr10	55255437	.	G	A	.	PASS	.	intergenic	NM_001142772,NM_001190478	dist=454146;dist=343553	.	.	ENST00000457975.2	10q21.1	.	.	Score=7445;Name="538025:L1PA4(LINE)"	.	.	.	.	.	.	.	.	.	.	.	.	.	.	.	.	.	.	.	.	.	.	.	.	.	.	.	.	.	.	.	.
chr10	55379958	.	A	C	.	PASS	.	intergenic	NM_001142772,NM_001190478	dist=578667;dist=219032	.	.	ENST00000457975.2	10q21.1	.	.	.	.	.	.	.	.	.	.	.	.	.	.	.	.	.	.	.	.	.	.	.	.	.	.	.	.	.	.	.	.	.	.	.
chr10	55709132	.	A	G	.	PASS	.	intergenic	NM_001190478,NM_007057	dist=108405;dist=648306	.	.	.	10q21.1	.	.	.	.	.	.	.	.	.	.	.	.	.	.	.	.	.	.	.	.	.	.	.	.	.	.	.	.	.	.	.	.	.	.	.
chr10	55824777	.	C	A	.	PASS	.	intergenic	NM_001190478,NM_007057	dist=224050;dist=532661	.	.	.	10q21.1	.	.	Score=15137;Name="538907:HERVL74-int(LTR)"	.	.	.	.	.	.	.	.	.	.	.	.	.	.	.	.	.	.	.	.	.	.	.	.	.	.	.	.	.	.	.	.
chr10	56134843	.	T	A	.	PASS	.	intergenic	NM_001190478,NM_007057	dist=534116;dist=222595	.	.	.	10q21.1	.	.	.	.	.	.	.	.	.	.	.	.	.	.	.	.	.	.	.	.	.	.	.	.	.	.	.	.	.	.	.	.	.	.	.
chr10	56442484	.	G	C	.	PASS	.	intergenic	NM_007057,NR_037490	dist=81211;dist=861995	.	.	.	10q21.1	.	Score=0.924263;Name=chr10:79912273	Score=26676;Name="539886:L1PA3(LINE)"	.	.	.	.	.	.	.	.	.	.	.	.	.	.	.	.	.	.	.	.	.	.	.	.	.	.	.	.	.	.	.	.
chr10	57432677	.	T	G	.	PASS	.	intergenic	NR_037490,NM_152230	dist=128118;dist=758840	.	.	.	10q21.1	.	.	.	.	.	.	.	.	.	.	.	.	.	.	.	.	.	.	.	.	.	.	.	.	.	.	.	.	.	.	.	.	.	.	.
chr10	57560802	.	T	C	.	PASS	.	intergenic	NR_037490,NM_152230	dist=256243;dist=630715	.	.	.	10q21.1	.	.	Score=7536;Name="541642:L1MA2(LINE)"	.	.	.	.	.	.	.	.	.	.	.	.	.	.	.	.	.	.	.	.	.	.	.	.	.	.	.	.	.	.	.	.
chr10	57901903	.	A	T	.	PASS	.	intergenic	NR_037490,NM_152230	dist=597344;dist=289614	.	.	.	10q21.1	.	.	Score=5213;Name="542163:L1MD2(LINE)"	.	.	.	.	.	.	.	.	.	.	.	.	.	.	.	.	.	.	.	.	.	.	.	.	.	.	.	.	.	.	.	.
chr10	57927928	.	T	C	.	PASS	.	intergenic	NR_037490,NM_152230	dist=623369;dist=263589	.	.	.	10q21.1	.	.	.	.	.	.	.	.	.	.	.	.	.	.	.	.	.	.	.	.	.	.	.	.	.	.	.	.	.	.	.	.	.	.	.
chr10	59163512	.	T	G	.	PASS	.	intergenic	NR_108046,NR_131782	dist=161895;dist=10451	.	.	.	10q21.1	.	.	Score=4271;Name="544364:L1PB4(LINE)"	.	.	.	.	.	.	.	.	.	.	.	.	.	.	.	.	.	.	.	.	.	.	.	.	.	.	.	.	.	.	.	.
chr10	59436519	.	G	C	.	PASS	.	intergenic	NM_001347842,NM_194298	dist=73338;dist=214245	.	.	.	10q21.2	.	.	.	.	.	.	.	.	.	.	.	.	.	.	.	.	.	.	.	.	.	.	.	.	.	.	.	.	.	.	.	.	.	.	.
chr10	59723923	.	T	A	.	PASS	.	intergenic	NM_001323977,NM_001304731	dist=13844;dist=13067	.	.	ENST00000395347.1	10q21.2	.	.	Score=765;Name="545330:L2a(LINE)"	.	.	.	.	.	.	.	.	.	.	.	.	.	.	.	.	.	.	.	.	.	.	.	.	.	.	.	.	.	.	.	.
chr10	59723925	.	T	A	.	PASS	.	intergenic	NM_001323977,NM_001304731	dist=13846;dist=13065	.	.	ENST00000395347.1	10q21.2	.	.	Score=765;Name="545330:L2a(LINE)"	.	.	.	.	.	.	.	.	.	.	.	.	.	.	.	.	.	.	.	.	.	.	.	.	.	.	.	.	.	.	.	.
chr10	59788102	.	C	G	.	PASS	.	downstream	NM_005436	.	.	.	.	10q21.2	.	.	Score=466;Name="545455:L1ME3A(LINE)"	.	.	.	.	.	.	.	.	.	.	.	.	.	.	.	.	.	.	.	.	.	.	.	.	.	.	.	.	.	.	.	.
chr10	59968017	.	G	T	.	PASS	.	intergenic	NR_024340,NM_001149	dist=7104;dist=58281	.	.	.	10q21.2	.	.	.	.	.	.	.	.	.	.	.	.	.	.	.	.	.	.	.	.	.	.	.	.	.	.	.	.	.	.	.	.	.	.	.
chr10	60529705	.	G	C	.	PASS	ANK3	intronic	NM_001204403,NM_001204404	.	.	.	ENST00000503366.5,ENST00000373827.6	10q21.2	.	.	.	.	.	.	.	.	.	.	.	.	.	.	.	.	.	.	.	.	.	.	.	.	.	.	.	.	.	.	.	.	.	.	.
chr10	62367871	.	T	A	.	PASS	LOC283045	ncRNA_intronic	NR_104162	.	.	.	.	10q21.2	.	.	Score=2165;Name="549973:AluSz(SINE)"	.	.	.	.	.	.	.	.	.	.	.	.	.	.	.	.	.	.	.	.	.	.	.	.	.	.	.	.	.	.	.	.
chr10	62698503	.	A	T	.	PASS	.	intergenic	NM_199451,NM_032804	dist=26492;dist=106253	.	.	.	10q21.2	.	.	.	.	.	.	.	.	.	.	.	.	.	.	.	.	.	.	.	.	.	.	.	.	.	.	.	.	.	.	.	.	.	.	.
chr10	64779957	.	G	T	.	PASS	.	intergenic	NM_001001330,NR_001446	dist=1154834;dist=45571	.	.	.	10q21.3	.	.	Score=36385;Name="554655:HERV9-int(LTR)"	.	.	.	.	.	.	.	.	.	.	.	.	.	.	.	.	.	.	.	.	.	.	.	.	.	.	.	.	.	.	.	.
chr10	65019101	.	T	G	.	PASS	.	intergenic	NR_134456,NR_120647	dist=94583;dist=552324	.	.	.	10q21.3	.	.	Score=14249;Name="555000:L1PA15(LINE)"	.	.	.	.	.	.	.	.	.	.	.	.	.	.	.	.	.	.	.	.	.	.	.	.	.	.	.	.	.	.	.	.
chr10	65310240	.	A	C	.	PASS	.	intergenic	NR_134456,NR_120647	dist=385722;dist=261185	.	.	.	10q21.3	.	.	Score=1723;Name="555490:THE1C(LTR)"	.	.	.	.	.	.	.	.	.	.	.	.	.	.	.	.	.	.	.	.	.	.	.	.	.	.	.	.	.	.	.	.
chr10	67592491	.	C	A	.	PASS	CTNNA3	intronic	NM_001127384,NM_001291133,NM_013266	.	.	.	ENST00000433211.6	10q21.3	.	.	Score=1881;Name="559164:L1MEg(LINE)"	.	.	.	.	.	.	.	.	.	.	.	.	.	.	.	.	.	.	.	.	.	.	.	.	.	.	.	.	.	.	.	.
chr10	68441997	.	A	C	.	PASS	DNA2	intronic	NM_001080449	.	.	.	ENST00000551118.6,ENST00000358410.7,ENST00000399180.3	10q21.3	.	.	Score=1677;Name="561076:AluJb(SINE)"	.	.	.	.	.	.	.	.	.	.	.	.	.	.	.	.	.	.	.	.	.	.	.	.	.	.	.	.	.	.	.	.
chr10	68714470	.	T	A	.	PASS	.	intergenic	NM_030625,NM_018237	dist=19988;dist=6674	.	.	.	10q21.3	.	.	Score=2855;Name="561894:AluYi6(SINE)"	.	.	.	.	.	.	.	.	.	.	.	.	.	.	.	.	.	.	.	.	.	.	.	.	.	.	.	.	.	.	.	.
chr10	69201553	.	G	T	.	PASS	SUPV3L1	intronic	NM_001301683,NM_001323584,NM_001323585,NM_001323586,NM_001323587,NM_001323588,NM_003171	.	.	.	ENST00000359655.8	10q22.1	.	.	Score=1792;Name="563251:AluJr4(SINE)"	.	.	.	.	.	.	.	.	.	.	.	.	.	.	.	.	.	.	.	.	.	.	.	.	.	.	.	.	.	.	.	.
chr10	69270215	.	A	C	.	PASS	HK1	intronic	NM_001322364,NM_001322365,NM_033497,NM_033498,NM_033500	.	.	.	ENST00000448642.6,ENST00000360289.6	10q22.1	.	.	Score=877;Name="563411:FLAM_A(SINE)"	.	.	.	.	.	.	.	.	.	.	.	.	.	.	.	.	.	.	.	.	.	.	.	.	.	.	.	.	.	.	.	.
chr10	69574293	.	T	G	.	PASS	.	upstream	NM_020999	.	.	.	.	10q22.1	.	.	.	.	.	.	.	.	.	.	.	.	.	.	.	.	.	.	.	.	.	.	.	.	.	.	.	.	.	.	.	.	.	.	.
chr10	69988914	.	C	G	.	PASS	.	intergenic	NM_080805,NM_018649	dist=29766;dist=63687	.	.	.	10q22.1	.	.	Score=4951;Name="564956:L1MEf(LINE)"	.	.	.	.	.	.	.	.	.	.	.	.	.	.	.	.	.	.	.	.	.	.	.	.	.	.	.	.	.	.	.	.
chr10	70007923	.	A	C	.	PASS	.	intergenic	NM_080805,NM_018649	dist=48775;dist=44678	.	.	.	10q22.1	.	.	.	.	.	.	.	.	.	.	.	.	.	.	.	.	.	.	.	.	.	.	.	.	.	.	.	.	.	.	.	.	.	.	.
chr10	70687042	.	T	G	.	PASS	ADAMTS14	intronic	NM_080722,NM_139155	.	.	.	ENST00000373207.1,ENST00000373208.5	10q22.1	.	.	Score=5942;Name="566599:SVA_F(Retroposon)"	.	.	.	.	.	.	.	.	.	.	.	.	.	.	.	.	.	.	.	.	.	.	.	.	.	.	.	.	.	.	.	.
chr10	70974950	.	C	G	.	PASS	.	intergenic	NR_134313,NM_001244889	dist=19309;dist=237585	.	.	.	10q22.1	.	.	Score=228;Name="567147:L2(LINE)"	.	.	.	.	.	.	.	.	.	.	.	.	.	.	.	.	.	.	.	.	.	.	.	.	.	.	.	.	.	.	.	.
chr10	71714152	.	T	G	.	PASS	C10orf105	UTR3	NM_001164375,NM_001168390	NM_001164375:c.*1784A>C;NM_001168390:c.*1784A>C	.	.	ENST00000441508.2,ENST00000622827.4,ENST00000224721.10,ENST00000398809.8,ENST00000616684.4,ENST00000398786.2	10q22.1	.	.	.	.	.	.	.	.	.	.	.	.	.	.	.	.	.	.	.	.	.	.	.	.	.	.	.	.	.	.	.	.	.	.	.
chr10	71853077	.	G	A	.	PASS	.	intergenic	NM_002778,NM_004273	dist=1702;dist=111285	.	.	.	10q22.1	.	.	Score=2477;Name="568918:AluYf1(SINE)"	.	.	.	.	.	.	.	.	.	.	.	.	.	.	.	.	.	.	.	.	.	.	.	.	.	.	.	.	.	.	.	.
chr10	71983689	.	G	T	.	PASS	CHST3	intronic	NM_004273	.	.	.	ENST00000373115.4	10q22.1	.	.	Score=2030;Name="569262:AluSz(SINE)"	.	.	.	.	.	.	.	.	.	.	.	.	.	.	.	.	.	.	.	.	.	.	.	.	.	.	.	.	.	.	.	.
chr10	73670624	rs3998285	G	A	.	PASS	.	intergenic	NM_001114133,NM_001144000	dist=14519;dist=3651	.	.	ENST00000607450.1	10q22.2	.	Score=0.978372;Name=chr10:46332689	Score=3174;Name="573412:L1MB2(LINE)"	rs3998285	.	.	.	.	.	.	.	.	.	.	.	.	.	.	.	.	.	.	.	.	.	.	.	.	.	.	.	.	.	.	.
chr10	73989755	.	A	C	.	PASS	.	intergenic	NM_001001791,NM_014000	dist=66978;dist=8359	.	.	.	10q22.2	.	.	.	.	.	.	.	.	.	.	.	.	.	.	.	.	.	.	.	.	.	.	.	.	.	.	.	.	.	.	.	.	.	.	.
chr10	74771380	.	C	A	.	PASS	.	intergenic	NM_001202450,NM_012330	dist=62077;dist=55033	.	.	.	10q22.2	.	.	Score=1164;Name="575872:AluJr(SINE)"	.	.	.	.	.	.	.	.	.	.	.	.	.	.	.	.	.	.	.	.	.	.	.	.	.	.	.	.	.	.	.	.
chr10	75045253	.	C	T	.	PASS	DUPD1	intronic	NM_001003892	.	.	.	ENST00000338487.5	10q22.2	.	.	Score=1994;Name="576475:AluSz6(SINE)"	.	.	.	.	.	.	.	.	.	.	.	.	.	.	.	.	.	.	.	.	.	.	.	.	.	.	.	.	.	.	.	.
chr10	75859616	rs2181442	C	A	.	PASS	C10orf11	intronic	NM_001305581,NM_032024	.	.	.	ENST00000372499.5,ENST00000611255.4	10q22.2	.	.	Score=55;Name="578124:(AC)n(Simple_repeat)"	rs2181442	.	.	.	.	.	.	.	.	.	.	.	.	.	.	.	.	.	.	.	.	.	.	.	.	.	.	.	.	.	.	.
chr10	77170555	rs11002061	G	C	.	PASS	KCNMA1	intronic	NM_001014797,NM_001161352,NM_001161353,NM_001271518,NM_001271519,NM_001322829,NM_001322830,NM_001322832,NM_001322835,NM_001322836,NM_001322837,NM_001322838,NM_002247	.	.	.	ENST00000626620.2,ENST00000354353.9,ENST00000286628.12,ENST00000404771.7,ENST00000286627.9,ENST00000372443.5,ENST00000406533.7,ENST00000404857.5,ENST00000372440.5	10q22.3	.	.	.	rs11002061	.	.	.	.	.	.	.	.	.	.	.	.	.	.	.	.	.	.	.	.	.	.	.	.	.	.	.	.	.	.	.
chr10	77387560	rs199590840	T	C	.	PASS	KCNMA1	intronic	NM_001014797,NM_001161352,NM_001161353,NM_001271518,NM_001271519,NM_001322829,NM_001322830,NM_001322832,NM_001322835,NM_001322836,NM_001322837,NM_002247	.	.	.	ENST00000404857.5,ENST00000406533.7,ENST00000372440.5,ENST00000354353.9,ENST00000626620.2,ENST00000404771.7,ENST00000286628.12,ENST00000372443.5,ENST00000286627.9	10q22.3	.	.	Score=100;Name="580522:(TTCTT)n(Simple_repeat)"	rs199590840	.	.	.	.	.	.	.	.	.	.	.	.	.	.	.	.	.	.	.	.	.	.	.	.	.	.	.	.	.	.	.
chr10	77387561	rs200212198	C	T	.	PASS	KCNMA1	intronic	NM_001014797,NM_001161352,NM_001161353,NM_001271518,NM_001271519,NM_001322829,NM_001322830,NM_001322832,NM_001322835,NM_001322836,NM_001322837,NM_002247	.	.	.	ENST00000372443.5,ENST00000286627.9,ENST00000354353.9,ENST00000626620.2,ENST00000404771.7,ENST00000286628.12,ENST00000404857.5,ENST00000406533.7,ENST00000372440.5	10q22.3	.	.	Score=100;Name="580522:(TTCTT)n(Simple_repeat)"	rs200212198	.	.	.	.	.	.	.	.	.	.	.	.	.	.	.	.	.	.	.	.	.	.	.	.	.	.	.	.	.	.	.
chr10	77906693	.	T	G	.	PASS	DLG5	intronic	NM_004747	.	.	.	ENST00000372391.6	10q22.3	.	.	Score=2069;Name="581629:AluSx(SINE)"	.	.	.	.	.	.	.	.	.	.	.	.	.	.	.	.	.	.	.	.	.	.	.	.	.	.	.	.	.	.	.	.
chr10	78791831	.	G	T	.	PASS	.	intergenic	NR_073447,NR_015429	dist=511618;dist=151495	.	.	.	10q22.3	.	.	Score=1890;Name="583569:Tigger3a(DNA)"	.	.	.	.	.	.	.	.	.	.	.	.	.	.	.	.	.	.	.	.	.	.	.	.	.	.	.	.	.	.	.	.
chr10	79682134	.	A	C	.	PASS	.	upstream	NR_027512	.	.	.	ENST00000596088.5,ENST00000623504.1	10q22.3	.	Score=0.975468;Name=chr10:50655358	Score=1143;Name="585330:L1M5(LINE)"	.	.	.	.	.	.	.	.	.	.	.	.	.	.	.	.	.	.	.	.	.	.	.	.	.	.	.	.	.	.	.	.
chr10	80073318	.	T	G	.	PASS	TMEM254-AS1	ncRNA_intronic	NR_027428,NR_027429,NR_027430,NR_027431,NR_027432	.	.	.	ENST00000412298.5	10q22.3	.	.	Score=2401;Name="586029:AluSc(SINE)"	.	.	.	.	.	.	.	.	.	.	.	.	.	.	.	.	.	.	.	.	.	.	.	.	.	.	.	.	.	.	.	.
chr10	80233654	rs2945446	T	C	.	PASS	.	intergenic	NR_038464,NR_136612	dist=13997;dist=14104	.	.	.	10q22.3	.	Score=0.976616;Name=chr10:79500987	.	rs2945446	.	.	.	.	.	.	.	.	.	.	.	.	.	.	.	.	.	.	.	.	.	.	.	.	.	.	.	.	.	.	.
chr10	80727874	.	C	T	.	PASS	.	intergenic	NM_207372,NM_001165972	dist=81314;dist=1147440	.	.	.	10q23.1	.	.	Score=28340;Name="587356:L1PA2(LINE)"	.	.	.	.	.	.	.	.	.	.	.	.	.	.	.	.	.	.	.	.	.	.	.	.	.	.	.	.	.	.	.	.
chr10	80746975	.	T	C	.	PASS	.	intergenic	NM_207372,NM_001165972	dist=100415;dist=1128339	.	.	.	10q23.1	.	.	Score=37533;Name="587380:HERVI-int(LTR)"	.	.	.	.	.	.	.	.	.	.	.	.	.	.	.	.	.	.	.	.	.	.	.	.	.	.	.	.	.	.	.	.
chr10	80825424	.	T	A	.	PASS	.	intergenic	NM_207372,NM_001165972	dist=178864;dist=1049890	.	.	.	10q23.1	.	.	Score=2164;Name="587528:AluSx(SINE)"	.	.	.	.	.	.	.	.	.	.	.	.	.	.	.	.	.	.	.	.	.	.	.	.	.	.	.	.	.	.	.	.
chr10	81106220	.	T	C	.	PASS	.	intergenic	NM_207372,NM_001165972	dist=459660;dist=769094	.	.	.	10q23.1	.	.	Score=212;Name="587952:MIRc(SINE)"	.	.	.	.	.	.	.	.	.	.	.	.	.	.	.	.	.	.	.	.	.	.	.	.	.	.	.	.	.	.	.	.
chr10	81703287	.	A	C	.	PASS	.	intergenic	NM_207372,NM_001165972	dist=1056727;dist=172027	.	.	.	10q23.1	.	.	.	.	.	.	.	.	.	.	.	.	.	.	.	.	.	.	.	.	.	.	.	.	.	.	.	.	.	.	.	.	.	.	.
chr10	82558768	.	G	C	.	PASS	NRG3	intronic	NM_001010848,NM_001165972,NM_001165973	.	.	.	ENST00000372142.6,ENST00000404547.5,ENST00000556918.5,ENST00000404576.6,ENST00000372141.6	10q23.1	.	.	.	.	.	.	.	.	.	.	.	.	.	.	.	.	.	.	.	.	.	.	.	.	.	.	.	.	.	.	.	.	.	.	.
chr10	82630626	.	T	G	.	PASS	NRG3	intronic	NM_001010848,NM_001165972,NM_001165973	.	.	.	ENST00000372142.6,ENST00000556918.5,ENST00000404547.5,ENST00000404576.6,ENST00000372141.6	10q23.1	.	.	Score=1216;Name="590488:AluSq2(SINE)"	.	.	.	.	.	.	.	.	.	.	.	.	.	.	.	.	.	.	.	.	.	.	.	.	.	.	.	.	.	.	.	.
chr10	83013578	.	G	C	.	PASS	.	intergenic	NM_001165972,NR_134317	dist=26399;dist=658828	.	.	.	10q23.1	.	.	Score=918;Name="591149:Arthur1C(DNA)"	.	.	.	.	.	.	.	.	.	.	.	.	.	.	.	.	.	.	.	.	.	.	.	.	.	.	.	.	.	.	.	.
chr10	83190011	.	A	T	.	PASS	.	intergenic	NM_001165972,NR_134317	dist=202832;dist=482395	.	.	.	10q23.1	.	.	Score=351;Name="591465:HAL1ME(LINE)"	.	.	.	.	.	.	.	.	.	.	.	.	.	.	.	.	.	.	.	.	.	.	.	.	.	.	.	.	.	.	.	.
chr10	83548556	.	A	C	.	PASS	.	intergenic	NM_001165972,NR_134317	dist=561377;dist=123850	.	.	.	10q23.1	.	.	Score=3961;Name="592053:L1MB7(LINE)"	.	.	.	.	.	.	.	.	.	.	.	.	.	.	.	.	.	.	.	.	.	.	.	.	.	.	.	.	.	.	.	.
chr10	83598153	.	T	G	.	PASS	.	intergenic	NM_001165972,NR_134317	dist=610974;dist=74253	.	.	.	10q23.1	.	.	Score=1080;Name="592150:L1MC1(LINE)"	.	.	.	.	.	.	.	.	.	.	.	.	.	.	.	.	.	.	.	.	.	.	.	.	.	.	.	.	.	.	.	.
chr10	83887534	.	A	T	.	PASS	.	intergenic	NR_134317,NM_014394	dist=210445;dist=251895	.	.	.	10q23.1	.	.	.	.	.	.	.	.	.	.	.	.	.	.	.	.	.	.	.	.	.	.	.	.	.	.	.	.	.	.	.	.	.	.	.
chr10	84183654	rs796338395	A	T	.	PASS	C10orf99	intronic	NM_207373	.	.	.	ENST00000372126.3	10q23.1	.	.	Score=1895;Name="593206:AluJb(SINE)"	rs796338395	.	.	.	.	.	.	.	.	.	.	.	.	.	.	.	.	.	.	.	.	.	.	.	.	.	.	.	.	.	.	.
chr10	84764782	.	G	C	.	PASS	.	intergenic	NM_001284240,NR_120668	dist=246261;dist=428639	.	.	.	10q23.1	.	.	.	.	.	.	.	.	.	.	.	.	.	.	.	.	.	.	.	.	.	.	.	.	.	.	.	.	.	.	.	.	.	.	.
chr10	85105736	.	G	A	.	PASS	.	intergenic	NM_001284240,NR_120668	dist=587215;dist=87685	.	.	.	10q23.1	.	.	Score=843;Name="594781:L2(LINE)"	.	.	.	.	.	.	.	.	.	.	.	.	.	.	.	.	.	.	.	.	.	.	.	.	.	.	.	.	.	.	.	.
chr10	85155505	.	T	G	.	PASS	.	intergenic	NM_001284240,NR_120668	dist=636984;dist=37916	.	.	.	10q23.1	.	.	Score=7065;Name="594845:LTR49-int(LTR)"	.	.	.	.	.	.	.	.	.	.	.	.	.	.	.	.	.	.	.	.	.	.	.	.	.	.	.	.	.	.	.	.
chr10	85318769	.	A	T	.	PASS	.	intergenic	NR_120667,NR_120669	dist=119831;dist=113174	.	.	.	10q23.1	.	.	.	.	.	.	.	.	.	.	.	.	.	.	.	.	.	.	.	.	.	.	.	.	.	.	.	.	.	.	.	.	.	.	.
chr10	85815663	.	T	G	.	PASS	GRID1	intronic	NM_017551	.	.	.	ENST00000536331.5,ENST00000327946.11	10q23.1	.	.	Score=567;Name="595898:L1MD3(LINE)"	.	.	.	.	.	.	.	.	.	.	.	.	.	.	.	.	.	.	.	.	.	.	.	.	.	.	.	.	.	.	.	.
chr10	85910709	.	T	G	.	PASS	GRID1	intronic	NM_017551	.	.	.	ENST00000327946.11,ENST00000536331.5	10q23.1	.	.	.	.	.	.	.	.	.	.	.	.	.	.	.	.	.	.	.	.	.	.	.	.	.	.	.	.	.	.	.	.	.	.	.
chr10	87251555	.	T	C	.	PASS	NUTM2A-AS1	ncRNA_intronic	NR_024397	.	.	.	ENST00000446751.5,ENST00000447424.5	10q23.2	.	Score=0.99392;Name=chr10:87429953	.	.	.	.	.	.	.	.	.	.	.	.	.	.	.	.	.	.	.	.	.	.	.	.	.	.	.	.	.	.	.	.	.
chr10	87282546	.	T	G	.	PASS	NUTM2A-AS1	ncRNA_intronic	NR_024397	.	.	.	ENST00000446751.5,ENST00000447424.5	10q23.2	.	Score=0.99392;Name=chr10:87429953	.	.	.	.	.	.	.	.	.	.	.	.	.	.	.	.	.	.	.	.	.	.	.	.	.	.	.	.	.	.	.	.	.
chr10	87588179	.	C	T	.	PASS	.	intergenic	NM_004897,NM_004670	dist=34718;dist=71540	.	.	.	10q23.2	.	.	Score=335;Name="599381:L1M6(LINE)"	.	.	.	.	.	.	.	.	.	.	.	.	.	.	.	.	.	.	.	.	.	.	.	.	.	.	.	.	.	.	.	.
chr10	88079491	.	G	C	.	PASS	.	intergenic	NM_001304717,NM_018363	dist=107561;dist=194373	.	.	.	10q23.31	.	.	Score=767;Name="600334:MLT1H(LTR)"	.	.	.	.	.	.	.	.	.	.	.	.	.	.	.	.	.	.	.	.	.	.	.	.	.	.	.	.	.	.	.	.
chr10	88963906	.	G	C	.	PASS	ACTA2	intronic	NM_001141945,NM_001320855	.	.	.	ENST00000371927.7,ENST00000458208.5	10q23.31	.	.	.	.	.	.	.	.	.	.	.	.	.	.	.	.	.	.	.	.	.	.	.	.	.	.	.	.	.	.	.	.	.	.	.
chr10	90582481	.	C	T	.	PASS	.	intergenic	NR_110657,NM_019859	dist=41676;dist=158338	.	.	.	10q23.31	.	.	.	.	.	.	.	.	.	.	.	.	.	.	.	.	.	.	.	.	.	.	.	.	.	.	.	.	.	.	.	.	.	.	.
chr10	91434873	.	G	A	.	PASS	HECTD2-AS1	ncRNA_intronic	NR_024467	.	.	.	ENST00000298068.9,ENST00000371681.8,ENST00000446394.5	10q23.32	.	.	Score=576;Name="606316:MIR(SINE)"	.	.	.	.	.	.	.	.	.	.	.	.	.	.	.	.	.	.	.	.	.	.	.	.	.	.	.	.	.	.	.	.
chr10	91732017	.	A	C	.	PASS	.	intergenic	NM_005398,NR_108070	dist=98916;dist=50822	.	.	.	10q23.32	.	.	Score=21280;Name="606881:L1PA5(LINE)"	.	.	.	.	.	.	.	.	.	.	.	.	.	.	.	.	.	.	.	.	.	.	.	.	.	.	.	.	.	.	.	.
chr10	91799079	.	T	G	.	PASS	TNKS2	intronic	NM_025235	.	.	.	ENST00000371627.4	10q23.32	.	.	Score=19;Name="607012:(TTTTGG)n(Simple_repeat)"	.	.	.	.	.	.	.	.	.	.	.	.	.	.	.	.	.	.	.	.	.	.	.	.	.	.	.	.	.	.	.	.
chr10	92410183	.	T	G	.	PASS	.	intergenic	NM_017824,NR_038243	dist=56219;dist=8478	.	.	.	10q23.33	.	.	Score=2277;Name="608449:AluSx(SINE)"	.	.	.	.	.	.	.	.	.	.	.	.	.	.	.	.	.	.	.	.	.	.	.	.	.	.	.	.	.	.	.	.
chr10	93415269	.	A	C	.	PASS	MYOF	intronic	NM_013451,NM_133337	.	.	.	ENST00000359263.8,ENST00000358334.9,ENST00000371489.5	10q23.33	.	.	Score=2249;Name="610836:L2c(LINE)"	.	.	.	.	.	.	.	.	.	.	.	.	.	.	.	.	.	.	.	.	.	.	.	.	.	.	.	.	.	.	.	.
chr10	93601194	.	A	C	.	PASS	RBP4	UTR5	NM_006744	NM_006744:c.-166T>G	.	.	ENST00000629763.2,ENST00000371469.2,ENST00000371464.7,ENST00000615669.4,ENST00000371467.5,ENST00000604414.1	10q23.33	.	.	.	.	.	.	.	.	.	.	.	.	.	.	.	.	.	.	.	.	.	.	.	.	.	.	.	.	.	.	.	.	.	.	.
chr10	94716683	.	G	C	.	PASS	CYP2C18	intronic	NM_000772,NM_001128925	.	.	.	ENST00000339022.6,ENST00000464755.1,ENST00000285979.10	10q23.33	.	.	Score=23631;Name="613699:L1PA5(LINE)"	.	.	.	.	.	.	.	.	.	.	.	.	.	.	.	.	.	.	.	.	.	.	.	.	.	.	.	.	.	.	.	.
chr10	94793492	.	T	C	.	PASS	CYP2C19	intronic	NM_000769	.	.	.	ENST00000371321.7,ENST00000464755.1	10q23.33	.	.	Score=23258;Name="613788:L1PA7(LINE)"	.	.	.	.	.	.	.	.	.	.	.	.	.	.	.	.	.	.	.	.	.	.	.	.	.	.	.	.	.	.	.	.
chr10	94797935	.	A	T	.	PASS	CYP2C19	intronic	NM_000769	.	.	.	ENST00000464755.1,ENST00000371321.7	10q23.33	.	.	Score=22923;Name="613790:L1PA5(LINE)"	.	.	.	.	.	.	.	.	.	.	.	.	.	.	.	.	.	.	.	.	.	.	.	.	.	.	.	.	.	.	.	.
chr10	94974525	.	G	T	.	PASS	CYP2C9	intronic	NM_000771	.	.	.	ENST00000260682.6	10q23.33	.	.	Score=4987;Name="613996:L1PA16(LINE)"	.	.	.	.	.	.	.	.	.	.	.	.	.	.	.	.	.	.	.	.	.	.	.	.	.	.	.	.	.	.	.	.
chr10	95152098	.	A	G	.	PASS	.	intergenic	NM_000770,NM_207321	dist=82601;dist=42102	.	.	ENST00000422744.2	10q23.33	.	.	Score=25694;Name="614200:L1PA3(LINE)"	.	.	.	.	.	.	.	.	.	.	.	.	.	.	.	.	.	.	.	.	.	.	.	.	.	.	.	.	.	.	.	.
chr10	95152985	.	A	C	.	PASS	.	intergenic	NM_000770,NM_207321	dist=83488;dist=41215	.	.	ENST00000422744.2	10q23.33	.	.	Score=25694;Name="614200:L1PA3(LINE)"	.	.	.	.	.	.	.	.	.	.	.	.	.	.	.	.	.	.	.	.	.	.	.	.	.	.	.	.	.	.	.	.
chr10	95166476	.	A	C	.	PASS	.	intergenic	NM_000770,NM_207321	dist=96979;dist=27724	.	.	ENST00000422744.2	10q23.33	.	.	Score=9918;Name="614211:L1PA7(LINE)"	.	.	.	.	.	.	.	.	.	.	.	.	.	.	.	.	.	.	.	.	.	.	.	.	.	.	.	.	.	.	.	.
chr10	95588737	.	A	C	.	PASS	.	intergenic	NM_001290295,NM_001323412	dist=27317;dist=17192	.	.	.	10q24.1	.	.	.	.	.	.	.	.	.	.	.	.	.	.	.	.	.	.	.	.	.	.	.	.	.	.	.	.	.	.	.	.	.	.	.
chr10	96037326	.	G	C	.	PASS	ENTPD1-AS1	ncRNA_intronic	NR_038444,NR_134320,NR_134321,NR_134322	.	.	.	ENST00000416301.5,ENST00000458228.5,ENST00000449197.1,ENST00000452728.5,ENST00000454638.5	10q24.1	.	.	Score=2261;Name="615963:L1PA16(LINE)"	.	.	.	.	.	.	.	.	.	.	.	.	.	.	.	.	.	.	.	.	.	.	.	.	.	.	.	.	.	.	.	.
chr10	97037094	.	G	A	.	PASS	SLIT1	intronic	NM_003061	.	.	.	ENST00000371070.8,ENST00000266058.8	10q24.1	.	.	Score=72;Name="618100:(TG)n(Simple_repeat)"	.	.	.	.	.	.	.	.	.	.	.	.	.	.	.	.	.	.	.	.	.	.	.	.	.	.	.	.	.	.	.	.
chr10	97064669	.	C	A	.	PASS	SLIT1	intronic	NM_003061	.	.	.	ENST00000266058.8,ENST00000371070.8,ENST00000371041.3	10q24.1	.	.	.	.	.	.	.	.	.	.	.	.	.	.	.	.	.	.	.	.	.	.	.	.	.	.	.	.	.	.	.	.	.	.	.
chr10	97147237	.	G	C	.	PASS	SLIT1	intronic	NM_003061	.	.	.	ENST00000266058.8,ENST00000371041.3,ENST00000371070.8	10q24.1	.	.	Score=2052;Name="618324:L1MB4(LINE)"	.	.	.	.	.	.	.	.	.	.	.	.	.	.	.	.	.	.	.	.	.	.	.	.	.	.	.	.	.	.	.	.
chr10	97935896	.	T	G	.	PASS	CRTAC1	intronic	NM_001206528,NM_018058	.	.	.	ENST00000370591.6,ENST00000309155.3,ENST00000370597.7	10q24.2	.	.	.	.	.	.	.	.	.	.	.	.	.	.	.	.	.	.	.	.	.	.	.	.	.	.	.	.	.	.	.	.	.	.	.
chr10	97935899	.	T	G	.	PASS	CRTAC1	intronic	NM_001206528,NM_018058	.	.	.	ENST00000370591.6,ENST00000309155.3,ENST00000370597.7	10q24.2	.	.	.	.	.	.	.	.	.	.	.	.	.	.	.	.	.	.	.	.	.	.	.	.	.	.	.	.	.	.	.	.	.	.	.
chr10	97966488	.	G	C	.	PASS	CRTAC1	intronic	NM_001206528,NM_018058	.	.	.	ENST00000370597.7,ENST00000370591.6,ENST00000309155.3	10q24.2	.	.	Score=7623;Name="620360:L1MC3(LINE)"	.	.	.	.	.	.	.	.	.	.	.	.	.	.	.	.	.	.	.	.	.	.	.	.	.	.	.	.	.	.	.	.
chr10	98936698	.	T	A	.	PASS	HPSE2	intronic	NM_001166244,NM_001166245,NM_001166246,NM_021828	.	.	.	ENST00000370546.5,ENST00000628193.2,ENST00000370552.7,ENST00000370549.5	10q24.2	.	.	Score=2295;Name="622261:AluSg(SINE)"	.	.	.	.	.	.	.	.	.	.	.	.	.	.	.	.	.	.	.	.	.	.	.	.	.	.	.	.	.	.	.	.
chr10	99138137	.	A	C	.	PASS	HPSE2	intronic	NM_001166244,NM_001166245,NM_001166246,NM_021828	.	.	.	ENST00000628193.2,ENST00000370546.5,ENST00000370549.5,ENST00000370552.7	10q24.2	.	.	Score=21412;Name="622567:L1PA7(LINE)"	.	.	.	.	.	.	.	.	.	.	.	.	.	.	.	.	.	.	.	.	.	.	.	.	.	.	.	.	.	.	.	.
chr10	101805655	.	C	A	.	PASS	MGEA5	intronic	NM_001142434,NM_012215	.	.	.	ENST00000357797.9,ENST00000439817.5,ENST00000361464.7,ENST00000370094.7	10q24.32	.	.	Score=2341;Name="628205:AluSp(SINE)"	.	.	.	.	.	.	.	.	.	.	.	.	.	.	.	.	.	.	.	.	.	.	.	.	.	.	.	.	.	.	.	.
chr10	102657027	.	A	C	.	PASS	TRIM8	exonic	NM_001345950,NM_030912	.	synonymous SNV	TRIM8:NM_001345950:exon5:c.A1233C:p.P411P,TRIM8:NM_030912:exon6:c.A1329C:p.P443P	ENST00000302424.11	10q24.32	.	.	.	.	.	.	.	.	.	.	.	.	.	.	.	.	.	.	.	.	.	.	.	.	.	.	.	.	.	.	.	.	.	.	.
chr10	103229045	.	T	G	.	PASS	.	intergenic	NM_001351195,NM_001143909	dist=35739;dist=16842	.	.	.	10q24.33	.	.	Score=2184;Name="631487:AluSq(SINE)"	.	.	.	.	.	.	.	.	.	.	.	.	.	.	.	.	.	.	.	.	.	.	.	.	.	.	.	.	.	.	.	.
chr10	103349592	.	T	G	.	PASS	PCGF6	intronic	NM_001011663,NM_032154	.	.	.	ENST00000337211.8,ENST00000369847.3	10q24.33	.	.	Score=2207;Name="631860:AluSg(SINE)"	.	.	.	.	.	.	.	.	.	.	.	.	.	.	.	.	.	.	.	.	.	.	.	.	.	.	.	.	.	.	.	.
chr10	103458266	.	A	C	.	PASS	CALHM1	exonic	NM_001001412	.	synonymous SNV	CALHM1:NM_001001412:exon1:c.T486G:p.P162P	ENST00000411906.1,ENST00000329905.5	10q24.33	.	.	.	.	.	.	.	.	.	.	.	.	.	.	.	.	.	.	.	.	.	.	.	.	.	.	.	.	.	.	.	.	.	.	.
chr10	103918450	.	A	C	.	PASS	.	upstream	NM_024928	.	.	.	.	10q24.33	.	.	.	.	.	.	.	.	.	.	.	.	.	.	.	.	.	.	.	.	.	.	.	.	.	.	.	.	.	.	.	.	.	.	.
chr10	104580695	rs925394477	A	T	.	PASS	.	intergenic	NR_120624,NM_014978	dist=100420;dist=60406	.	.	.	10q25.1	.	.	.	rs925394477	.	.	.	.	.	.	.	.	.	.	.	.	.	.	.	.	.	.	.	.	.	.	.	.	.	.	.	.	.	.	.
chr10	104605919	.	A	G	.	PASS	.	intergenic	NR_120624,NM_014978	dist=125644;dist=35182	.	.	.	10q25.1	.	.	Score=293;Name="634417:L1ME4a(LINE)"	.	.	.	.	.	.	.	.	.	.	.	.	.	.	.	.	.	.	.	.	.	.	.	.	.	.	.	.	.	.	.	.
chr10	105408543	.	A	G	.	PASS	.	intergenic	NM_014978,NR_120625	dist=143301;dist=265067	.	.	.	10q25.1	.	.	.	.	.	.	.	.	.	.	.	.	.	.	.	.	.	.	.	.	.	.	.	.	.	.	.	.	.	.	.	.	.	.	.
chr10	105976084	.	A	T	.	PASS	.	intergenic	NR_120625,NR_134329	dist=155751;dist=164081	.	.	.	10q25.1	.	.	.	.	.	.	.	.	.	.	.	.	.	.	.	.	.	.	.	.	.	.	.	.	.	.	.	.	.	.	.	.	.	.	.
chr10	106647350	.	G	C	.	PASS	SORCS1	intronic	NM_001013031,NM_001206569,NM_001206570,NM_001206571,NM_001206572,NM_052918	.	.	.	ENST00000612154.4,ENST00000622431.4,ENST00000263054.10,ENST00000344440.7,ENST00000369698.5	10q25.1	.	.	Score=1274;Name="637984:L1ME3A(LINE)"	.	.	.	.	.	.	.	.	.	.	.	.	.	.	.	.	.	.	.	.	.	.	.	.	.	.	.	.	.	.	.	.
chr10	107233879	rs10884445	A	C	.	PASS	.	intergenic	NM_052918,NR_125760	dist=69171;dist=637697	.	.	.	10q25.1	.	.	Score=2361;Name="639061:AluSx1(SINE)"	rs10884445	.	.	.	.	.	.	.	.	.	.	.	.	.	.	.	.	.	.	.	.	.	.	.	.	.	.	.	.	.	.	.
chr10	107342941	.	A	C	.	PASS	.	intergenic	NM_052918,NR_125760	dist=178233;dist=528635	.	.	.	10q25.1	.	.	Score=735;Name="639239:L1MC5a(LINE)"	.	.	.	.	.	.	.	.	.	.	.	.	.	.	.	.	.	.	.	.	.	.	.	.	.	.	.	.	.	.	.	.
chr10	107414907	.	A	C	.	PASS	.	intergenic	NM_052918,NR_125760	dist=250199;dist=456669	.	.	.	10q25.1	.	.	.	.	.	.	.	.	.	.	.	.	.	.	.	.	.	.	.	.	.	.	.	.	.	.	.	.	.	.	.	.	.	.	.
chr10	107849391	.	T	G	.	PASS	.	intergenic	NM_052918,NR_125760	dist=684683;dist=22185	.	.	ENST00000630847.2	10q25.1	.	.	.	.	.	.	.	.	.	.	.	.	.	.	.	.	.	.	.	.	.	.	.	.	.	.	.	.	.	.	.	.	.	.	.
chr10	108350952	.	T	C	.	PASS	.	intergenic	NR_125760,NM_001324134	dist=281659;dist=1513814	.	.	.	10q25.1	.	.	.	.	.	.	.	.	.	.	.	.	.	.	.	.	.	.	.	.	.	.	.	.	.	.	.	.	.	.	.	.	.	.	.
chr10	108518509	.	G	C	.	PASS	.	intergenic	NR_125760,NM_001324134	dist=449216;dist=1346257	.	.	.	10q25.1	.	.	Score=1274;Name="641187:THE1D(LTR)"	.	.	.	.	.	.	.	.	.	.	.	.	.	.	.	.	.	.	.	.	.	.	.	.	.	.	.	.	.	.	.	.
chr10	108550500	.	T	C	.	PASS	.	intergenic	NR_125760,NM_001324134	dist=481207;dist=1314266	.	.	ENST00000366253.2	10q25.1	.	.	.	.	.	.	.	.	.	.	.	.	.	.	.	.	.	.	.	.	.	.	.	.	.	.	.	.	.	.	.	.	.	.	.
chr10	108856802	.	G	C	.	PASS	.	intergenic	NR_125760,NM_001324134	dist=787509;dist=1007964	.	.	.	10q25.1	.	.	Score=3966;Name="641736:L1MC3(LINE)"	.	.	.	.	.	.	.	.	.	.	.	.	.	.	.	.	.	.	.	.	.	.	.	.	.	.	.	.	.	.	.	.
chr10	109414917	.	G	C	.	PASS	.	intergenic	NR_125760,NM_001324134	dist=1345624;dist=449849	.	.	.	10q25.1	.	.	Score=5751;Name="642649:L1PA3(LINE)"	.	.	.	.	.	.	.	.	.	.	.	.	.	.	.	.	.	.	.	.	.	.	.	.	.	.	.	.	.	.	.	.
chr10	111032031	.	A	C	.	PASS	.	intergenic	NM_001324336,NM_000681	dist=18364;dist=45001	.	.	.	10q25.2	.	.	Score=2668;Name="645616:THE1A(LTR)"	.	.	.	.	.	.	.	.	.	.	.	.	.	.	.	.	.	.	.	.	.	.	.	.	.	.	.	.	.	.	.	.
chr10	111197695	rs12412191	G	T	.	PASS	.	intergenic	NM_000681,NM_001244949	dist=116791;dist=952169	.	.	.	10q25.2	.	.	Score=64;Name="645897:(AT)n(Simple_repeat)"	rs12412191	.	.	.	.	.	.	.	.	.	.	.	.	.	.	.	.	.	.	.	.	.	.	.	.	.	.	.	.	.	.	.
chr10	111357643	.	T	G	.	PASS	.	intergenic	NM_000681,NM_001244949	dist=276739;dist=792221	.	.	.	10q25.2	.	.	Score=254;Name="646180:MIRb(SINE)"	.	.	.	.	.	.	.	.	.	.	.	.	.	.	.	.	.	.	.	.	.	.	.	.	.	.	.	.	.	.	.	.
chr10	111987604	.	G	A	.	PASS	.	intergenic	NM_000681,NM_001244949	dist=906700;dist=162260	.	.	.	10q25.2	.	.	.	.	.	.	.	.	.	.	.	.	.	.	.	.	.	.	.	.	.	.	.	.	.	.	.	.	.	.	.	.	.	.	.
chr10	112120398	.	A	G	.	PASS	.	intergenic	NM_000681,NM_001244949	dist=1039494;dist=29466	.	.	.	10q25.2	.	.	.	.	.	.	.	.	.	.	.	.	.	.	.	.	.	.	.	.	.	.	.	.	.	.	.	.	.	.	.	.	.	.	.
chr10	115350365	rs782797486	G	A	.	PASS	ATRNL1	intronic	NM_207303	.	.	.	ENST00000355044.7	10q25.3	.	.	Score=14443;Name="653561:L1MA4(LINE)"	rs782797486	.	.	.	.	.	.	.	.	.	.	.	.	.	.	.	.	.	.	.	.	.	.	.	.	.	.	.	.	.	.	.
chr10	115544214	.	T	C	.	PASS	ATRNL1	intronic	NM_207303	.	.	.	ENST00000355044.7	10q25.3	.	.	.	.	.	.	.	.	.	.	.	.	.	.	.	.	.	.	.	.	.	.	.	.	.	.	.	.	.	.	.	.	.	.	.
chr10	115811519	.	T	A	.	PASS	ATRNL1	intronic	NM_207303	.	.	.	ENST00000355044.7	10q25.3	.	.	Score=5903;Name="654306:L1MEc(LINE)"	.	.	.	.	.	.	.	.	.	.	.	.	.	.	.	.	.	.	.	.	.	.	.	.	.	.	.	.	.	.	.	.
chr10	116488698	.	C	G	.	PASS	.	intergenic	NM_001011709,NM_000936	dist=10742;dist=57226	.	.	.	10q25.3	.	.	.	.	.	.	.	.	.	.	.	.	.	.	.	.	.	.	.	.	.	.	.	.	.	.	.	.	.	.	.	.	.	.	.
chr10	116870173	.	G	C	.	PASS	ENO4	intronic	NM_001242699	.	.	.	ENST00000622726.4,ENST00000409522.5,ENST00000369207.2,ENST00000341276.9	10q25.3	.	.	.	.	.	.	.	.	.	.	.	.	.	.	.	.	.	.	.	.	.	.	.	.	.	.	.	.	.	.	.	.	.	.	.
chr10	118203031	.	C	T	.	PASS	CASC2	ncRNA_intronic	NR_026939,NR_026940	.	.	.	ENST00000435944.5	10q26.11	.	.	.	.	.	.	.	.	.	.	.	.	.	.	.	.	.	.	.	.	.	.	.	.	.	.	.	.	.	.	.	.	.	.	.
chr10	120011626	rs1031622976	C	G	.	PASS	.	intergenic	NR_039830,NM_000982	dist=53034;dist=343035	.	.	.	10q26.12	.	.	.	rs1031622976	.	.	.	.	.	.	.	.	.	.	.	.	.	.	.	.	.	.	.	.	.	.	.	.	.	.	.	.	.	.	.
chr10	120026750	.	G	C	.	PASS	.	intergenic	NR_039830,NM_000982	dist=68158;dist=327911	.	.	.	10q26.12	.	.	Score=1342;Name="662547:L4_A_Mam(LINE)"	.	.	.	.	.	.	.	.	.	.	.	.	.	.	.	.	.	.	.	.	.	.	.	.	.	.	.	.	.	.	.	.
chr10	121025049	.	G	T	.	PASS	.	intergenic	NM_018117,NM_001144914	dist=115523;dist=453281	.	.	.	10q26.12	.	.	.	.	.	.	.	.	.	.	.	.	.	.	.	.	.	.	.	.	.	.	.	.	.	.	.	.	.	.	.	.	.	.	.
chr10	122164053	.	T	G	.	PASS	TACC2	intronic	NM_001291876,NM_001291877,NM_001291878,NM_001291879,NM_006997,NM_206860,NM_206861,NM_206862	.	.	.	ENST00000368999.5,ENST00000360561.7,ENST00000334433.7,ENST00000260733.7,ENST00000513429.5,ENST00000453444.6,ENST00000369001.5,ENST00000515273.5,ENST00000369004.7,ENST00000515603.5,ENST00000358010.5,ENST00000369000.5,ENST00000369005.5	10q26.13	.	.	.	.	.	.	.	.	.	.	.	.	.	.	.	.	.	.	.	.	.	.	.	.	.	.	.	.	.	.	.	.	.	.	.
chr10	122387102	.	T	C	.	PASS	PLEKHA1	intronic	NM_001001974,NM_001195608,NM_001330178	.	.	.	ENST00000368990.7,ENST00000368989.6,ENST00000392799.7	10q26.13	.	.	Score=1920;Name="667001:L1ME1(LINE)"	.	.	.	.	.	.	.	.	.	.	.	.	.	.	.	.	.	.	.	.	.	.	.	.	.	.	.	.	.	.	.	.
chr10	122773957	rs10902936	A	T	.	PASS	DMBT1P1	ncRNA_intronic	NR_003570	.	.	.	.	10q26.13	.	.	Score=29;Name="667604:(GA)n(Simple_repeat)"	rs10902936	.	.	.	.	.	.	.	0.1409	0.0194	0.0129	0.0862	0.0274	0.0613019	.	.	.	.	.	.	.	.	.	.	.	.	.	.	.	.	.	.
chr10	123751715	.	A	G	.	PASS	CPXM2	intronic	NM_198148	.	.	.	ENST00000615851.4,ENST00000241305.3	10q26.13	.	.	.	.	.	.	.	.	.	.	.	.	.	.	.	.	.	.	.	.	.	.	.	.	.	.	.	.	.	.	.	.	.	.	.
chr10	125894156	rs79189818	C	T	.	PASS	.	intergenic	NM_018180,NM_001350939	dist=12841;dist=2379	.	.	.	10q26.2	.	Score=0.962343;Name=chr22:10731599	.	rs79189818	.	.	.	.	.	.	.	.	.	.	.	.	.	.	.	.	.	.	.	.	.	.	.	.	.	.	.	.	.	.	.
chr10	125899909	.	G	T	.	PASS	FANK1	intronic	NM_001350939,NM_145235	.	.	.	ENST00000368693.5,ENST00000368695.5	10q26.2	.	Score=0.962343;Name=chr22:10731599	.	.	.	.	.	.	.	.	.	.	.	.	.	.	.	.	.	.	.	.	.	.	.	.	.	.	.	.	.	.	.	.	.
chr10	127220372	.	G	T	.	PASS	DOCK1	intronic	NM_001290223,NM_001380	.	.	.	ENST00000623213.1,ENST00000280333.9	10q26.2	.	.	.	.	.	.	.	.	.	.	.	.	.	.	.	.	.	.	.	.	.	.	.	.	.	.	.	.	.	.	.	.	.	.	.
chr10	127588940	.	A	G	.	PASS	.	intergenic	NM_001030013,NM_207426	dist=36269;dist=148334	.	.	.	10q26.2	.	.	.	.	.	.	.	.	.	.	.	.	.	.	.	.	.	.	.	.	.	.	.	.	.	.	.	.	.	.	.	.	.	.	.
chr10	128069512	.	T	G	.	PASS	PTPRE	intronic	NM_001316676,NM_001316677,NM_001323354,NM_001323355,NM_001323356,NM_001323357,NM_006504,NM_130435	.	.	.	ENST00000306042.9,ENST00000254667.7	10q26.2	.	.	.	.	.	.	.	.	.	.	.	.	.	.	.	.	.	.	.	.	.	.	.	.	.	.	.	.	.	.	.	.	.	.	.
chr10	128109008	.	C	A	.	PASS	MKI67	exonic	NM_001145966,NM_002417	.	missense SNV	MKI67:NM_001145966:exon12:c.G1752T:p.K584N,MKI67:NM_002417:exon13:c.G2832T:p.K944N	ENST00000368653.7,ENST00000368654.7,ENST00000617118.1	10q26.2	.	.	.	.	.	.	.	.	.	.	.	.	.	.	.	.	.	.	.	.	.	.	.	.	.	.	.	.	.	.	.	.	.	.	.
chr10	128239663	rs143333081	A	C	.	PASS	.	intergenic	NM_002417,NR_120619	dist=113459;dist=46287	.	.	ENST00000630252.1	10q26.2	.	.	Score=65;Name="676795:(TC)n(Simple_repeat)"	rs143333081	.	.	.	.	.	.	.	.	.	.	.	.	.	.	.	.	.	.	.	.	.	.	.	.	.	.	.	.	.	.	.
chr10	128837071	.	T	G	.	PASS	.	intergenic	NR_120619,NM_002412	dist=519345;dist=630113	.	.	.	10q26.3	.	.	.	.	.	.	.	.	.	.	.	.	.	.	.	.	.	.	.	.	.	.	.	.	.	.	.	.	.	.	.	.	.	.	.
chr10	128905808	.	C	T	.	PASS	.	intergenic	NR_120619,NM_002412	dist=588082;dist=561376	.	.	.	10q26.3	.	.	.	.	.	.	.	.	.	.	.	.	.	.	.	.	.	.	.	.	.	.	.	.	.	.	.	.	.	.	.	.	.	.	.
chr10	129286292	.	T	C	.	PASS	.	intergenic	NR_120619,NM_002412	dist=968566;dist=180892	.	.	ENST00000414581.1	10q26.3	.	.	Score=2106;Name="678100:L1ME2(LINE)"	.	.	.	.	.	.	.	.	.	.	.	.	.	.	.	.	.	.	.	.	.	.	.	.	.	.	.	.	.	.	.	.
chr10	129286688	.	C	T	.	PASS	.	intergenic	NR_120619,NM_002412	dist=968962;dist=180496	.	.	ENST00000414581.1	10q26.3	.	.	Score=2106;Name="678100:L1ME2(LINE)"	.	.	.	.	.	.	.	.	.	.	.	.	.	.	.	.	.	.	.	.	.	.	.	.	.	.	.	.	.	.	.	.
chr10	129577312	.	A	G	.	PASS	MGMT	intronic	NM_002412	.	.	.	ENST00000306010.7	10q26.3	.	.	Score=23985;Name="678442:L1PA4(LINE)"	.	.	.	.	.	.	.	.	.	.	.	.	.	.	.	.	.	.	.	.	.	.	.	.	.	.	.	.	.	.	.	.
chr10	130399120	rs956994744	A	G	.	PASS	.	intergenic	NM_001199868,NR_036180	dist=218738;dist=563468	.	.	.	10q26.3	.	.	Score=1531;Name="679484:MER4D(LTR)"	rs956994744	.	.	.	.	.	.	.	.	.	.	.	.	.	.	.	.	.	.	.	.	.	.	.	.	.	.	.	.	.	.	.
chr10	130415843	.	T	C	.	PASS	.	intergenic	NM_001199868,NR_036180	dist=235461;dist=546745	.	.	.	10q26.3	.	.	Score=1396;Name="679514:L1MEc(LINE)"	.	.	.	.	.	.	.	.	.	.	.	.	.	.	.	.	.	.	.	.	.	.	.	.	.	.	.	.	.	.	.	.
chr10	130825729	.	G	C	.	PASS	.	intergenic	NM_001199868,NR_036180	dist=645347;dist=136859	.	.	.	10q26.3	.	.	.	.	.	.	.	.	.	.	.	.	.	.	.	.	.	.	.	.	.	.	.	.	.	.	.	.	.	.	.	.	.	.	.
chr10	131197199	.	A	G	.	PASS	TCERG1L	intronic	NM_174937	.	.	.	ENST00000368642.4	10q26.3	.	.	Score=2157;Name="680501:AluY(SINE)"	.	.	.	.	.	.	.	.	.	.	.	.	.	.	.	.	.	.	.	.	.	.	.	.	.	.	.	.	.	.	.	.
chr10	131246912	rs113895350	G	A	.	PASS	TCERG1L	intronic	NM_174937	.	.	.	ENST00000368642.4	10q26.3	.	.	.	rs113895350	.	.	.	.	.	.	.	.	.	.	.	.	.	.	.	.	.	.	.	.	.	.	.	.	.	.	.	.	.	.	.
chr10	131617068	rs10782373	A	C	.	PASS	.	intergenic	NM_174937,NR_038365	dist=305347;dist=155330	.	.	.	10q26.3	.	.	Score=2779;Name="681032:AluYb8(SINE)"	rs10782373	.	.	.	.	.	.	.	.	.	.	.	.	.	.	.	.	.	.	.	.	.	.	.	.	.	.	.	.	.	.	.
chr10	132454465	.	G	T	.	PASS	.	intergenic	NM_173541,NM_005539	dist=6144;dist=83314	.	.	.	10q26.3	.	.	.	.	.	.	.	.	.	.	.	.	.	.	.	.	.	.	.	.	.	.	.	.	.	.	.	.	.	.	.	.	.	.	.
chr10	132553204	.	T	G	.	PASS	INPP5A	intronic	NM_005539	.	.	.	ENST00000368593.7,ENST00000368594.7	10q26.3	.	.	.	.	.	.	.	.	.	.	.	.	.	.	.	.	.	.	.	.	.	.	.	.	.	.	.	.	.	.	.	.	.	.	.
chr10	133011007	rs111200341	G	A	.	PASS	.	intergenic	NR_046231,NR_111905	dist=34510;dist=74242	.	.	.	10q26.3	.	.	.	rs111200341	.	.	.	.	.	.	.	.	.	.	.	.	.	.	.	.	.	.	.	.	.	.	.	.	.	.	.	.	.	.	.
chr10	133011687	rs1027892773	G	T	.	PASS	.	intergenic	NR_046231,NR_111905	dist=35190;dist=73562	.	.	.	10q26.3	.	.	.	rs1027892773	.	.	.	.	.	.	.	.	.	.	.	.	.	.	.	.	.	.	.	.	.	.	.	.	.	.	.	.	.	.	.
chr10	133478189	.	G	C	.	PASS	.	intergenic	NR_002934,NM_000773	dist=9744;dist=49174	.	.	.	10q26.3	.	Score=0.965251;Name=chr10:133478997	.	.	.	.	.	.	.	.	.	.	.	.	.	.	.	.	.	.	.	.	.	.	.	.	.	.	.	.	.	.	.	.	.
chr11	1087248	.	G	A	.	PASS	MUC2	intronic	NM_002457	.	.	.	.	11p15.5	.	.	.	.	.	.	.	.	.	.	.	.	.	.	.	.	.	.	.	.	.	.	.	.	.	.	.	.	.	.	.	.	.	.	.
chr11	1087272	.	G	A	.	PASS	MUC2	intronic	NM_002457	.	.	.	.	11p15.5	.	.	.	.	.	.	.	.	.	.	.	.	.	.	.	.	.	.	.	.	.	.	.	.	.	.	.	.	.	.	.	.	.	.	.
chr11	1600268	.	C	A	.	PASS	.	intergenic	NR_021489,NM_001012708	dist=1084;dist=7297	.	.	.	11p15.5	.	Score=0.930476;Name=chr11:71554455	Score=3526;Name="687389:L1M4(LINE)"	.	.	.	.	.	.	.	.	.	.	.	.	.	.	.	.	.	.	.	.	.	.	.	.	.	.	.	.	.	.	.	.
chr11	2648989	.	T	C	.	PASS	KCNQ1OT1	ncRNA_exonic	NR_002728	.	.	.	ENST00000155840.9,ENST00000335475.5,ENST00000597346.1	11p15.5	.	.	Score=28;Name="688950:(T)n(Simple_repeat)"	.	.	.	.	.	.	.	.	.	.	.	.	.	.	.	.	.	.	.	.	.	.	.	.	.	.	.	.	.	.	.	.
chr11	3028055	rs918760830	A	G	.	PASS	CARS	intronic	NM_001014437,NM_001194997,NM_001751,NM_139273	.	.	.	ENST00000380525.8,ENST00000397111.9,ENST00000529772.5,ENST00000278224.13	11p15.4	.	.	Score=8717;Name="689455:LTR13(LTR)"	rs918760830	.	.	.	.	.	.	.	.	.	.	.	.	.	.	.	.	.	.	.	.	.	.	.	.	.	.	.	.	.	.	.
chr11	3028079	.	T	C	.	PASS	CARS	intronic	NM_001014437,NM_001194997,NM_001751,NM_139273	.	.	.	ENST00000380525.8,ENST00000529772.5,ENST00000278224.13,ENST00000397111.9	11p15.4	.	.	Score=8717;Name="689455:LTR13(LTR)"	.	.	.	.	.	.	.	.	.	.	.	.	.	.	.	.	.	.	.	.	.	.	.	.	.	.	.	.	.	.	.	.
chr11	3583636	rs61879938	T	C	.	PASS	.	intergenic	NR_126335,NR_002720	dist=11649;dist=42824	.	.	.	11p15.4	.	Score=0.959317;Name=chr11:71616982	.	rs61879938	.	.	.	.	.	.	.	.	.	.	.	.	.	.	.	.	.	.	.	.	.	.	.	.	.	.	.	.	.	.	.
chr11	5285305	.	T	C	.	PASS	.	intergenic	NM_005330,NM_033179	dist=15162;dist=15709	.	.	ENST00000380237.5,ENST00000380252.5,ENST00000380259.6	11p15.4	.	.	.	.	.	.	.	.	.	.	.	.	.	.	.	.	.	.	.	.	.	.	.	.	.	.	.	.	.	.	.	.	.	.	.
chr11	5703103	.	G	T	.	PASS	TRIM22	intronic	NM_001199573,NM_006074	.	.	.	ENST00000380027.5,ENST00000379965.7	11p15.4	.	.	Score=2705;Name="694154:L1PA16(LINE)"	.	.	.	.	.	.	.	.	.	.	.	.	.	.	.	.	.	.	.	.	.	.	.	.	.	.	.	.	.	.	.	.
chr11	5834455	.	C	G	.	PASS	.	intergenic	NM_001005174,NM_001005167	dist=13154;dist=6501	.	.	ENST00000380027.5	11p15.4	.	.	Score=1312;Name="694348:L1M3c(LINE)"	.	.	.	.	.	.	.	.	.	.	.	.	.	.	.	.	.	.	.	.	.	.	.	.	.	.	.	.	.	.	.	.
chr11	5996526	.	C	G	.	PASS	.	intergenic	NM_001005173,NM_001005179	dist=9541;dist=5525	.	.	.	11p15.4	.	.	.	.	.	.	.	.	.	.	.	.	.	.	.	.	.	.	.	.	.	.	.	.	.	.	.	.	.	.	.	.	.	.	.
chr11	6146931	.	A	G	.	PASS	.	intergenic	NM_001005181,NM_001004052	dist=38096;dist=22424	.	.	ENST00000529961.1	11p15.4	.	.	Score=27202;Name="694787:L1PA3(LINE)"	.	.	.	.	.	.	.	.	.	.	.	.	.	.	.	.	.	.	.	.	.	.	.	.	.	.	.	.	.	.	.	.
chr11	6916400	.	A	T	.	PASS	.	intergenic	NM_003700,NM_001004684	dist=23900;dist=4602	.	.	.	11p15.4	.	.	Score=2227;Name="696182:L1MEc(LINE)"	.	.	.	.	.	.	.	.	.	.	.	.	.	.	.	.	.	.	.	.	.	.	.	.	.	.	.	.	.	.	.	.
chr11	10161118	.	G	C	.	PASS	SBF2	intronic	NM_030962	.	.	.	ENST00000256190.12,ENST00000532735.1	11p15.4	.	.	Score=2189;Name="702456:AluSz(SINE)"	.	.	.	.	.	.	.	.	.	.	.	.	.	.	.	.	.	.	.	.	.	.	.	.	.	.	.	.	.	.	.	.
chr11	10407925	.	T	G	.	PASS	CAND1.11	ncRNA_intronic	NR_103765	.	.	.	.	11p15.4	.	.	.	.	.	.	.	.	.	.	.	.	.	.	.	.	.	.	.	.	.	.	.	.	.	.	.	.	.	.	.	.	.	.	.
chr11	10680408	rs879655380	A	G	.	PASS	MRVI1	intronic	NM_001100163,NM_001100167,NM_001206880,NM_001206881,NM_130385	.	.	.	ENST00000527509.6,ENST00000423302.6,ENST00000547195.5,ENST00000541483.5,ENST00000558540.5	11p15.4	.	.	Score=124;Name="703414:GA-rich(Low_complexity)"	rs879655380	.	.	.	.	.	.	.	.	.	.	.	.	.	.	.	.	.	.	.	.	.	.	.	.	.	.	.	.	.	.	.
chr11	12672201	.	C	T	.	PASS	.	intergenic	NM_018222,NM_021961	dist=136845;dist=2221	.	.	.	11p15.3	.	.	.	.	.	.	.	.	.	.	.	.	.	.	.	.	.	.	.	.	.	.	.	.	.	.	.	.	.	.	.	.	.	.	.
chr11	14171702	.	C	T	.	PASS	SPON1	intronic	NM_006108	.	.	.	ENST00000576479.3	11p15.2	.	.	Score=26847;Name="709960:L1PA4(LINE)"	.	.	.	.	.	.	.	.	.	.	.	.	.	.	.	.	.	.	.	.	.	.	.	.	.	.	.	.	.	.	.	.
chr11	14171720	.	T	C	.	PASS	SPON1	intronic	NM_006108	.	.	.	ENST00000576479.3	11p15.2	.	.	Score=26847;Name="709960:L1PA4(LINE)"	.	.	.	.	.	.	.	.	.	.	.	.	.	.	.	.	.	.	.	.	.	.	.	.	.	.	.	.	.	.	.	.
chr11	14295241	.	A	C	.	PASS	RRAS2	intronic	NM_001102669,NM_001177314,NM_001177315,NM_012250	.	.	.	ENST00000537760.5,ENST00000256196.8,ENST00000529237.5,ENST00000545643.5,ENST00000532814.5,ENST00000534746.5,ENST00000526063.5,ENST00000414023.6	11p15.2	.	.	.	.	.	.	.	.	.	.	.	.	.	.	.	.	.	.	.	.	.	.	.	.	.	.	.	.	.	.	.	.	.	.	.
chr11	14831114	.	C	A	.	PASS	PDE3B	intronic	NM_000922	.	.	.	ENST00000282096.8,ENST00000455098.2	11p15.2	.	.	.	.	.	.	.	.	.	.	.	.	.	.	.	.	.	.	.	.	.	.	.	.	.	.	.	.	.	.	.	.	.	.	.
chr11	16907042	rs7938050	T	C	.	PASS	PLEKHA7	intronic	NM_001329630,NM_001329631,NM_175058	.	.	.	ENST00000531066.5,ENST00000355661.7,ENST00000532079.1	11p15.1	.	.	Score=6706;Name="715003:SVA_D(Retroposon)"	rs7938050	.	.	.	.	.	.	.	0.8085	0.8517	0.7863	0.7133	0.7507	0.779353	.	.	.	.	.	.	.	.	.	.	.	.	.	.	.	.	.	.
chr11	18331705	rs184788097	G	T	.	PASS	GTF2H1	intronic	NM_001142307,NM_005316	.	.	.	ENST00000265963.8,ENST00000534641.5,ENST00000453096.6	11p15.1	.	.	.	rs184788097	.	.	.	.	.	.	.	.	.	.	.	.	.	.	.	.	.	.	.	.	.	.	.	.	.	.	.	.	.	.	.
chr11	19133152	.	C	G	.	PASS	ZDHHC13	intronic	NM_001001483,NM_019028	.	.	.	ENST00000399351.7,ENST00000446113.6	11p15.1	.	.	Score=2514;Name="719709:L1ME3B(LINE)"	.	.	.	.	.	.	.	.	.	.	.	.	.	.	.	.	.	.	.	.	.	.	.	.	.	.	.	.	.	.	.	.
chr11	19802870	.	A	G	.	PASS	NAV2	intronic	NM_001111018,NM_001244963,NM_145117,NM_182964	.	.	.	ENST00000527559.6,ENST00000349880.8,ENST00000396085.5,ENST00000360655.8,ENST00000396087.7,ENST00000540292.5	11p15.1	.	.	.	.	.	.	.	.	.	.	.	.	.	.	.	.	.	.	.	.	.	.	.	.	.	.	.	.	.	.	.	.	.	.	.
chr11	20491148	.	T	G	.	PASS	PRMT3	intronic	NM_001145166,NM_001145167,NM_005788	.	.	.	ENST00000331079.10,ENST00000437750.2	11p15.1	.	.	Score=2309;Name="722322:L1MEf(LINE)"	.	.	.	.	.	.	.	.	.	.	.	.	.	.	.	.	.	.	.	.	.	.	.	.	.	.	.	.	.	.	.	.
chr11	21912059	.	A	G	.	PASS	.	intergenic	NM_001288714,NM_001142649	dist=336376;dist=281117	.	.	.	11p15.1	.	.	Score=307;Name="724976:L2a(LINE)"	.	.	.	.	.	.	.	.	.	.	.	.	.	.	.	.	.	.	.	.	.	.	.	.	.	.	.	.	.	.	.	.
chr11	22344129	.	T	C	.	PASS	SLC17A6	intronic	NM_020346	.	.	.	ENST00000263160.3	11p14.3	.	.	.	.	.	.	.	.	.	.	.	.	.	.	.	.	.	.	.	.	.	.	.	.	.	.	.	.	.	.	.	.	.	.	.
chr11	23619719	.	T	G	.	PASS	.	intergenic	NR_107021,NM_001252008	dist=200529;dist=877251	.	.	.	11p14.3	.	.	Score=24;Name="727881:(TCCC)n(Simple_repeat)"	.	.	.	.	.	.	.	.	.	.	.	.	.	.	.	.	.	.	.	.	.	.	.	.	.	.	.	.	.	.	.	.
chr11	23809361	.	C	T	.	PASS	.	intergenic	NR_107021,NM_001252008	dist=390171;dist=687609	.	.	.	11p14.3	.	.	Score=3622;Name="728154:L1MC4a(LINE)"	.	.	.	.	.	.	.	.	.	.	.	.	.	.	.	.	.	.	.	.	.	.	.	.	.	.	.	.	.	.	.	.
chr11	24166107	.	G	C	.	PASS	.	intergenic	NR_107021,NM_001252008	dist=746917;dist=330863	.	.	.	11p14.3	.	.	.	.	.	.	.	.	.	.	.	.	.	.	.	.	.	.	.	.	.	.	.	.	.	.	.	.	.	.	.	.	.	.	.
chr11	25593892	.	T	C	.	PASS	.	intergenic	NM_001252008,NM_001313726	dist=511252;dist=595231	.	.	.	11p14.3	.	.	Score=442;Name="731082:MER45R(DNA)"	.	.	.	.	.	.	.	.	.	.	.	.	.	.	.	.	.	.	.	.	.	.	.	.	.	.	.	.	.	.	.	.
chr11	26118829	.	G	T	.	PASS	.	intergenic	NM_001252008,NM_001313726	dist=1036189;dist=70294	.	.	.	11p14.3	.	.	Score=26271;Name="731914:L1PA3(LINE)"	.	.	.	.	.	.	.	.	.	.	.	.	.	.	.	.	.	.	.	.	.	.	.	.	.	.	.	.	.	.	.	.
chr11	26490189	.	T	G	.	PASS	ANO3	intronic	NM_001313726,NM_001313727,NM_031418	.	.	.	ENST00000256737.7,ENST00000531568.1,ENST00000531646.1,ENST00000525139.5	11p14.2	.	.	Score=2521;Name="732549:THE1A(LTR)"	.	.	.	.	.	.	.	.	.	.	.	.	.	.	.	.	.	.	.	.	.	.	.	.	.	.	.	.	.	.	.	.
chr11	27187453	.	G	A	.	PASS	BBOX1-AS1	ncRNA_intronic	NR_125766,NR_125767,NR_125768	.	.	.	ENST00000530430.1	11p14.2	.	.	Score=626;Name="733740:MER63A(DNA)"	.	.	.	.	.	.	.	.	.	.	.	.	.	.	.	.	.	.	.	.	.	.	.	.	.	.	.	.	.	.	.	.
chr11	29809602	.	A	G	.	PASS	.	intergenic	NR_107035,NR_132652	dist=1332054;dist=170519	.	.	ENST00000530249.1	11p14.1	.	.	Score=311;Name="738470:MIRb(SINE)"	.	.	.	.	.	.	.	.	.	.	.	.	.	.	.	.	.	.	.	.	.	.	.	.	.	.	.	.	.	.	.	.
chr11	30255342	.	G	C	.	PASS	.	intergenic	NM_000510,NM_152316	dist=20065;dist=67757	.	.	.	11p14.1	.	.	.	.	.	.	.	.	.	.	.	.	.	.	.	.	.	.	.	.	.	.	.	.	.	.	.	.	.	.	.	.	.	.	.
chr11	31298726	.	T	A	.	PASS	DCDC1	intronic	NM_001350255,NM_181807	.	.	.	ENST00000597505.5,ENST00000452803.1	11p13	.	.	.	.	.	.	.	.	.	.	.	.	.	.	.	.	.	.	.	.	.	.	.	.	.	.	.	.	.	.	.	.	.	.	.
chr11	31628193	.	G	C	.	PASS	ELP4	intronic	NM_001288725,NM_001288726,NM_019040	.	.	.	ENST00000395934.2,ENST00000379163.9,ENST00000350638.9	11p13	.	.	.	.	.	.	.	.	.	.	.	.	.	.	.	.	.	.	.	.	.	.	.	.	.	.	.	.	.	.	.	.	.	.	.
chr11	31725625	.	T	A	.	PASS	ELP4	intronic	NM_001288725,NM_001288726,NM_019040	.	.	.	ENST00000350638.9,ENST00000379163.9,ENST00000454509.5,ENST00000395934.2,ENST00000429821.5	11p13	.	.	.	.	.	.	.	.	.	.	.	.	.	.	.	.	.	.	.	.	.	.	.	.	.	.	.	.	.	.	.	.	.	.	.
chr11	31730970	.	G	A	.	PASS	ELP4	intronic	NM_001288725,NM_001288726,NM_019040	.	.	.	ENST00000350638.9,ENST00000454509.5,ENST00000379163.9,ENST00000429821.5,ENST00000395934.2	11p13	.	.	.	.	.	.	.	.	.	.	.	.	.	.	.	.	.	.	.	.	.	.	.	.	.	.	.	.	.	.	.	.	.	.	.
chr11	32535499	.	T	A	.	PASS	.	intergenic	NR_120548,NM_001307929	dist=76730;dist=48268	.	.	.	11p13	.	.	Score=1656;Name="743468:AluJb(SINE)"	.	.	.	.	.	.	.	.	.	.	.	.	.	.	.	.	.	.	.	.	.	.	.	.	.	.	.	.	.	.	.	.
chr11	32535505	.	T	A	.	PASS	.	intergenic	NR_120548,NM_001307929	dist=76736;dist=48262	.	.	.	11p13	.	.	Score=1656;Name="743468:AluJb(SINE)"	.	.	.	.	.	.	.	.	.	.	.	.	.	.	.	.	.	.	.	.	.	.	.	.	.	.	.	.	.	.	.	.
chr11	34158659	.	T	G	.	PASS	ABTB2	intronic	NM_145804	.	.	.	ENST00000435224.2	11p13	.	.	.	.	.	.	.	.	.	.	.	.	.	.	.	.	.	.	.	.	.	.	.	.	.	.	.	.	.	.	.	.	.	.	.
chr11	34412942	.	A	T	.	PASS	.	intergenic	NM_145804,NM_001752	dist=54934;dist=25983	.	.	.	11p13	.	.	Score=672;Name="747523:LTR78(LTR)"	.	.	.	.	.	.	.	.	.	.	.	.	.	.	.	.	.	.	.	.	.	.	.	.	.	.	.	.	.	.	.	.
chr11	35434920	rs969891984	C	A	.	PASS	PAMR1	intronic	NM_001001991,NM_001282675,NM_001282676,NM_015430	.	.	.	ENST00000622144.4,ENST00000615849.4,ENST00000621476.4,ENST00000611014.4,ENST00000619888.4	11p13	.	.	.	rs969891984	.	.	.	.	.	.	.	.	.	.	.	.	.	.	.	.	.	.	.	.	.	.	.	.	.	.	.	.	.	.	.
chr11	36580617	.	A	C	.	PASS	.	downstream	NM_000448	.	.	.	.	11p12	.	.	Score=2123;Name="751476:MSTB(LTR)"	.	.	.	.	.	.	.	.	.	.	.	.	.	.	.	.	.	.	.	.	.	.	.	.	.	.	.	.	.	.	.	.
chr11	36702805	.	T	C	.	PASS	.	intergenic	NM_001276726,NR_135110	dist=43514;dist=1235796	.	.	.	11p12	.	.	.	.	.	.	.	.	.	.	.	.	.	.	.	.	.	.	.	.	.	.	.	.	.	.	.	.	.	.	.	.	.	.	.
chr11	37244736	.	C	T	.	PASS	.	intergenic	NM_001276726,NR_135110	dist=585445;dist=693865	.	.	.	11p12	.	.	Score=27439;Name="752627:L1PA2(LINE)"	.	.	.	.	.	.	.	.	.	.	.	.	.	.	.	.	.	.	.	.	.	.	.	.	.	.	.	.	.	.	.	.
chr11	38609993	.	G	A	.	PASS	.	intergenic	NR_135110,NR_120555	dist=655330;dist=8271	.	.	.	11p12	.	.	Score=900;Name="754863:L1MEg(LINE)"	.	.	.	.	.	.	.	.	.	.	.	.	.	.	.	.	.	.	.	.	.	.	.	.	.	.	.	.	.	.	.	.
chr11	38866896	.	T	C	.	PASS	.	intergenic	NR_120553,NM_001258419	dist=211647;dist=1247305	.	.	.	11p12	.	.	Score=11226;Name="755237:L1PB1(LINE)"	.	.	.	.	.	.	.	.	.	.	.	.	.	.	.	.	.	.	.	.	.	.	.	.	.	.	.	.	.	.	.	.
chr11	39314288	.	T	G	.	PASS	.	intergenic	NR_120553,NM_001258419	dist=659039;dist=799913	.	.	.	11p12	.	.	.	.	.	.	.	.	.	.	.	.	.	.	.	.	.	.	.	.	.	.	.	.	.	.	.	.	.	.	.	.	.	.	.
chr11	39729055	.	G	C	.	PASS	.	intergenic	NR_120553,NM_001258419	dist=1073806;dist=385146	.	.	.	11p12	.	.	Score=3210;Name="756729:MER39B(LTR)"	.	.	.	.	.	.	.	.	.	.	.	.	.	.	.	.	.	.	.	.	.	.	.	.	.	.	.	.	.	.	.	.
chr11	40148494	.	C	A	.	PASS	LRRC4C	intronic	NM_001258419,NM_020929	.	.	.	ENST00000278198.2,ENST00000619527.4,ENST00000528697.5,ENST00000530763.5,ENST00000527150.5	11p12	.	.	Score=8122;Name="757376:L1PA6(LINE)"	.	.	.	.	.	.	.	.	.	.	.	.	.	.	.	.	.	.	.	.	.	.	.	.	.	.	.	.	.	.	.	.
chr11	40414926	.	A	T	.	PASS	LRRC4C	intronic	NM_001258419,NM_020929	.	.	.	ENST00000530763.5,ENST00000528697.5	11p12	.	.	.	.	.	.	.	.	.	.	.	.	.	.	.	.	.	.	.	.	.	.	.	.	.	.	.	.	.	.	.	.	.	.	.
chr11	40679144	.	T	C	.	PASS	LRRC4C	intronic	NM_001258419,NM_020929	.	.	.	ENST00000528697.5,ENST00000530763.5	11p12	.	.	Score=10728;Name="758313:THE1B-int(LTR)"	.	.	.	.	.	.	.	.	.	.	.	.	.	.	.	.	.	.	.	.	.	.	.	.	.	.	.	.	.	.	.	.
chr11	40843928	.	C	T	.	PASS	LRRC4C	intronic	NM_001258419,NM_020929	.	.	.	ENST00000528697.5,ENST00000530763.5	11p12	.	.	.	.	.	.	.	.	.	.	.	.	.	.	.	.	.	.	.	.	.	.	.	.	.	.	.	.	.	.	.	.	.	.	.
chr11	41304353	.	G	A	.	PASS	LRRC4C	intronic	NM_001258419,NM_020929	.	.	.	ENST00000528697.5,ENST00000530763.5	11p12	.	.	Score=6772;Name="759385:SVA_F(Retroposon)"	.	.	.	.	.	.	.	.	.	.	.	.	.	.	.	.	.	.	.	.	.	.	.	.	.	.	.	.	.	.	.	.
chr11	41988885	.	G	A	.	PASS	.	intergenic	NR_120584,NR_135065	dist=152443;dist=12837	.	.	.	11p12	.	.	Score=91;Name="760638:A-rich(Low_complexity)"	.	.	.	.	.	.	.	.	.	.	.	.	.	.	.	.	.	.	.	.	.	.	.	.	.	.	.	.	.	.	.	.
chr11	41988889	.	G	A	.	PASS	.	intergenic	NR_120584,NR_135065	dist=152447;dist=12833	.	.	.	11p12	.	.	Score=91;Name="760638:A-rich(Low_complexity)"	.	.	.	.	.	.	.	.	.	.	.	.	.	.	.	.	.	.	.	.	.	.	.	.	.	.	.	.	.	.	.	.
chr11	45557284	.	G	C	.	PASS	.	intergenic	NR_122071,NM_003654	dist=168776;dist=90405	.	.	.	11p11.2	.	.	Score=1430;Name="767864:MLT1L(LTR)"	.	.	.	.	.	.	.	.	.	.	.	.	.	.	.	.	.	.	.	.	.	.	.	.	.	.	.	.	.	.	.	.
chr11	46752089	.	T	G	.	PASS	CKAP5	intronic	NM_001008938,NM_014756	.	.	.	ENST00000312055.9,ENST00000529230.5,ENST00000354558.7	11p11.2	.	.	.	.	.	.	.	.	.	.	.	.	.	.	.	.	.	.	.	.	.	.	.	.	.	.	.	.	.	.	.	.	.	.	.
chr11	47761511	.	T	C	.	PASS	FNBP4	intronic	NM_001318339,NM_015308	.	.	.	ENST00000263773.9	11p11.2	.	.	Score=2074;Name="772903:AluSg4(SINE)"	.	.	.	.	.	.	.	.	.	.	.	.	.	.	.	.	.	.	.	.	.	.	.	.	.	.	.	.	.	.	.	.
chr11	49035113	.	C	A	.	PASS	TRIM49B	exonic	NM_001206626	.	missense SNV	TRIM49B:NM_001206626:exon4:c.C757A:p.H253N	ENST00000332682.8,ENST00000622138.4	11p11.12	.	Score=0.965647;Name=chr11:89700751	.	.	.	.	.	.	.	.	.	.	.	.	.	.	.	.	.	.	.	.	.	.	.	.	.	.	.	.	.	.	.	.	.
chr11	49572842	.	T	G	.	PASS	LOC440040	ncRNA_intronic	NR_027044	.	.	.	.	11p11.12	.	Score=0.967637;Name=chr11:88842206	Score=2309;Name="775967:AluSz(SINE)"	.	.	.	.	.	.	.	.	.	.	.	.	.	.	.	.	.	.	.	.	.	.	.	.	.	.	.	.	.	.	.	.
chr11	50417339	.	C	A	.	PASS	LOC646813	ncRNA_intronic	NR_024504	.	.	.	.	11p11.12	.	Score=0.90837;Name=chr1:182865480	Score=2064;Name="777345:AluSg(SINE)"	.	.	.	.	.	.	.	.	.	.	.	.	.	.	.	.	.	.	.	.	.	.	.	.	.	.	.	.	.	.	.	.
chr11	50420959	.	C	A	.	PASS	.	downstream	NR_024504	.	.	.	.	11p11.12	.	Score=0.90837;Name=chr1:182865480	.	.	.	.	.	.	.	.	.	.	.	.	.	.	.	.	.	.	.	.	.	.	.	.	.	.	.	.	.	.	.	.	.
chr11	50510258	.	A	C	.	PASS	.	intergenic	NR_024504,NONE	dist=89627;dist=NONE	.	.	.	11p11.12	.	.	Score=13325;Name="777387:HERVK9-int(LTR)"	.	.	.	.	.	.	.	.	.	.	.	.	.	.	.	.	.	.	.	.	.	.	.	.	.	.	.	.	.	.	.	.
chr11	51199237	.	T	C	.	PASS	.	intergenic	NR_024504,NONE	dist=778606;dist=NONE	.	.	.	11p11.11	.	.	Score=1098;Name="777436:ALR/Alpha(Satellite)"	.	.	.	.	.	.	.	.	.	.	.	.	.	.	.	.	.	.	.	.	.	.	.	.	.	.	.	.	.	.	.	.
chr11	51558638	.	G	A	.	PASS	.	intergenic	NR_024504,NONE	dist=1138007;dist=NONE	.	.	.	11p11.11	.	.	Score=1114;Name="777437:ALR/Alpha(Satellite)"	.	.	.	.	.	.	.	.	.	.	.	.	.	.	.	.	.	.	.	.	.	.	.	.	.	.	.	.	.	.	.	.
chr11	51727248	.	G	A	.	PASS	.	intergenic	NR_024504,NONE	dist=1306617;dist=NONE	.	.	.	11p11.11	.	.	Score=1115;Name="777439:ALR/Alpha(Satellite)"	.	.	.	.	.	.	.	.	.	.	.	.	.	.	.	.	.	.	.	.	.	.	.	.	.	.	.	.	.	.	.	.
chr11	51839445	.	T	A	.	PASS	.	intergenic	NR_024504,NONE	dist=1418814;dist=NONE	.	.	.	11p11.11	.	.	Score=1115;Name="777439:ALR/Alpha(Satellite)"	.	.	.	.	.	.	.	.	.	.	.	.	.	.	.	.	.	.	.	.	.	.	.	.	.	.	.	.	.	.	.	.
chr11	51847156	.	T	A	.	PASS	.	intergenic	NR_024504,NONE	dist=1426525;dist=NONE	.	.	.	11p11.11	.	.	Score=1115;Name="777439:ALR/Alpha(Satellite)"	.	.	.	.	.	.	.	.	.	.	.	.	.	.	.	.	.	.	.	.	.	.	.	.	.	.	.	.	.	.	.	.
chr11	51898562	.	C	T	.	PASS	.	intergenic	NR_024504,NONE	dist=1477931;dist=NONE	.	.	.	11p11.11	.	.	Score=1115;Name="777439:ALR/Alpha(Satellite)"	.	.	.	.	.	.	.	.	.	.	.	.	.	.	.	.	.	.	.	.	.	.	.	.	.	.	.	.	.	.	.	.
chr11	51899780	.	C	A	.	PASS	.	intergenic	NR_024504,NONE	dist=1479149;dist=NONE	.	.	.	11p11.11	.	.	Score=1115;Name="777439:ALR/Alpha(Satellite)"	.	.	.	.	.	.	.	.	.	.	.	.	.	.	.	.	.	.	.	.	.	.	.	.	.	.	.	.	.	.	.	.
chr11	51926971	.	G	T	.	PASS	.	intergenic	NR_024504,NONE	dist=1506340;dist=NONE	.	.	.	11p11.11	.	.	Score=1115;Name="777439:ALR/Alpha(Satellite)"	.	.	.	.	.	.	.	.	.	.	.	.	.	.	.	.	.	.	.	.	.	.	.	.	.	.	.	.	.	.	.	.
chr11	51944156	.	C	G	.	PASS	.	intergenic	NR_024504,NONE	dist=1523525;dist=NONE	.	.	.	11p11.11	.	.	Score=1115;Name="777439:ALR/Alpha(Satellite)"	.	.	.	.	.	.	.	.	.	.	.	.	.	.	.	.	.	.	.	.	.	.	.	.	.	.	.	.	.	.	.	.
chr11	51993259	.	C	G	.	PASS	.	intergenic	NR_024504,NONE	dist=1572628;dist=NONE	.	.	.	11p11.11	.	.	Score=1088;Name="777442:ALR/Alpha(Satellite)"	.	.	.	.	.	.	.	.	.	.	.	.	.	.	.	.	.	.	.	.	.	.	.	.	.	.	.	.	.	.	.	.
chr11	52045693	.	T	G	.	PASS	.	intergenic	NR_024504,NONE	dist=1625062;dist=NONE	.	.	.	11p11.11	.	.	Score=1115;Name="777443:ALR/Alpha(Satellite)"	.	.	.	.	.	.	.	.	.	.	.	.	.	.	.	.	.	.	.	.	.	.	.	.	.	.	.	.	.	.	.	.
chr11	52053175	.	C	T	.	PASS	.	intergenic	NR_024504,NONE	dist=1632544;dist=NONE	.	.	.	11p11.11	.	.	Score=1115;Name="777443:ALR/Alpha(Satellite)"	.	.	.	.	.	.	.	.	.	.	.	.	.	.	.	.	.	.	.	.	.	.	.	.	.	.	.	.	.	.	.	.
chr11	52053183	.	T	G	.	PASS	.	intergenic	NR_024504,NONE	dist=1632552;dist=NONE	.	.	.	11p11.11	.	.	Score=1115;Name="777443:ALR/Alpha(Satellite)"	.	.	.	.	.	.	.	.	.	.	.	.	.	.	.	.	.	.	.	.	.	.	.	.	.	.	.	.	.	.	.	.
chr11	52118026	.	C	G	.	PASS	.	intergenic	NR_024504,NONE	dist=1697395;dist=NONE	.	.	.	11p11.11	.	.	Score=1115;Name="777443:ALR/Alpha(Satellite)"	.	.	.	.	.	.	.	.	.	.	.	.	.	.	.	.	.	.	.	.	.	.	.	.	.	.	.	.	.	.	.	.
chr11	52271447	.	G	A	.	PASS	.	intergenic	NR_024504,NONE	dist=1850816;dist=NONE	.	.	.	11p11.11	.	.	Score=1101;Name="777446:ALR/Alpha(Satellite)"	.	.	.	.	.	.	.	.	.	.	.	.	.	.	.	.	.	.	.	.	.	.	.	.	.	.	.	.	.	.	.	.
chr11	52287043	.	T	G	.	PASS	.	intergenic	NR_024504,NONE	dist=1866412;dist=NONE	.	.	.	11p11.11	.	.	Score=1101;Name="777446:ALR/Alpha(Satellite)"	.	.	.	.	.	.	.	.	.	.	.	.	.	.	.	.	.	.	.	.	.	.	.	.	.	.	.	.	.	.	.	.
chr11	52324364	.	C	G	.	PASS	.	intergenic	NR_024504,NONE	dist=1903733;dist=NONE	.	.	.	11p11.11	.	.	Score=1101;Name="777446:ALR/Alpha(Satellite)"	.	.	.	.	.	.	.	.	.	.	.	.	.	.	.	.	.	.	.	.	.	.	.	.	.	.	.	.	.	.	.	.
chr11	52363465	.	C	G	.	PASS	.	intergenic	NR_024504,NONE	dist=1942834;dist=NONE	.	.	.	11p11.11	.	.	Score=1101;Name="777446:ALR/Alpha(Satellite)"	.	.	.	.	.	.	.	.	.	.	.	.	.	.	.	.	.	.	.	.	.	.	.	.	.	.	.	.	.	.	.	.
chr11	52385975	.	T	G	.	PASS	.	intergenic	NR_024504,NONE	dist=1965344;dist=NONE	.	.	.	11p11.11	.	.	Score=1108;Name="777448:ALR/Alpha(Satellite)"	.	.	.	.	.	.	.	.	.	.	.	.	.	.	.	.	.	.	.	.	.	.	.	.	.	.	.	.	.	.	.	.
chr11	52472182	.	C	A	.	PASS	.	intergenic	NR_024504,NONE	dist=2051551;dist=NONE	.	.	.	11p11.11	.	.	Score=1108;Name="777448:ALR/Alpha(Satellite)"	.	.	.	.	.	.	.	.	.	.	.	.	.	.	.	.	.	.	.	.	.	.	.	.	.	.	.	.	.	.	.	.
chr11	52686167	.	C	A	.	PASS	.	intergenic	NONE,NM_001004703	dist=NONE;dist=1916902	.	.	.	11p11.11	.	.	Score=1115;Name="777449:ALR/Alpha(Satellite)"	.	.	.	.	.	.	.	.	.	.	.	.	.	.	.	.	.	.	.	.	.	.	.	.	.	.	.	.	.	.	.	.
chr11	52736871	.	G	C	.	PASS	.	intergenic	NONE,NM_001004703	dist=NONE;dist=1866198	.	.	.	11p11.11	.	.	Score=1115;Name="777449:ALR/Alpha(Satellite)"	.	.	.	.	.	.	.	.	.	.	.	.	.	.	.	.	.	.	.	.	.	.	.	.	.	.	.	.	.	.	.	.
chr11	52737077	.	C	T	.	PASS	.	intergenic	NONE,NM_001004703	dist=NONE;dist=1865992	.	.	.	11p11.11	.	.	Score=1115;Name="777449:ALR/Alpha(Satellite)"	.	.	.	.	.	.	.	.	.	.	.	.	.	.	.	.	.	.	.	.	.	.	.	.	.	.	.	.	.	.	.	.
chr11	52757666	.	G	C	.	PASS	.	intergenic	NONE,NM_001004703	dist=NONE;dist=1845403	.	.	.	11p11.11	.	.	Score=1115;Name="777449:ALR/Alpha(Satellite)"	.	.	.	.	.	.	.	.	.	.	.	.	.	.	.	.	.	.	.	.	.	.	.	.	.	.	.	.	.	.	.	.
chr11	52872451	.	G	T	.	PASS	.	intergenic	NONE,NM_001004703	dist=NONE;dist=1730618	.	.	.	11p11.11	.	.	Score=1115;Name="777449:ALR/Alpha(Satellite)"	.	.	.	.	.	.	.	.	.	.	.	.	.	.	.	.	.	.	.	.	.	.	.	.	.	.	.	.	.	.	.	.
chr11	53120653	.	C	T	.	PASS	.	intergenic	NONE,NM_001004703	dist=NONE;dist=1482416	.	.	.	11p11.11	.	.	Score=1114;Name="777450:ALR/Alpha(Satellite)"	.	.	.	.	.	.	.	.	.	.	.	.	.	.	.	.	.	.	.	.	.	.	.	.	.	.	.	.	.	.	.	.
chr11	53350164	.	G	C	.	PASS	.	intergenic	NONE,NM_001004703	dist=NONE;dist=1252905	.	.	.	11p11.11	.	.	Score=1104;Name="777453:ALR/Alpha(Satellite)"	.	.	.	.	.	.	.	.	.	.	.	.	.	.	.	.	.	.	.	.	.	.	.	.	.	.	.	.	.	.	.	.
chr11	53355592	.	A	G	.	PASS	.	intergenic	NONE,NM_001004703	dist=NONE;dist=1247477	.	.	.	11p11.11	.	.	Score=1104;Name="777453:ALR/Alpha(Satellite)"	.	.	.	.	.	.	.	.	.	.	.	.	.	.	.	.	.	.	.	.	.	.	.	.	.	.	.	.	.	.	.	.
chr11	53481473	.	T	G	.	PASS	.	intergenic	NONE,NM_001004703	dist=NONE;dist=1121596	.	.	.	11q11	.	.	Score=1104;Name="777453:ALR/Alpha(Satellite)"	.	.	.	.	.	.	.	.	.	.	.	.	.	.	.	.	.	.	.	.	.	.	.	.	.	.	.	.	.	.	.	.
chr11	53485569	.	G	A	.	PASS	.	intergenic	NONE,NM_001004703	dist=NONE;dist=1117500	.	.	.	11q11	.	.	Score=1104;Name="777453:ALR/Alpha(Satellite)"	.	.	.	.	.	.	.	.	.	.	.	.	.	.	.	.	.	.	.	.	.	.	.	.	.	.	.	.	.	.	.	.
chr11	53485617	.	G	C	.	PASS	.	intergenic	NONE,NM_001004703	dist=NONE;dist=1117452	.	.	.	11q11	.	.	Score=1104;Name="777453:ALR/Alpha(Satellite)"	.	.	.	.	.	.	.	.	.	.	.	.	.	.	.	.	.	.	.	.	.	.	.	.	.	.	.	.	.	.	.	.
chr11	53501334	.	A	C	.	PASS	.	intergenic	NONE,NM_001004703	dist=NONE;dist=1101735	.	.	.	11q11	.	.	Score=1091;Name="777454:ALR/Alpha(Satellite)"	.	.	.	.	.	.	.	.	.	.	.	.	.	.	.	.	.	.	.	.	.	.	.	.	.	.	.	.	.	.	.	.
chr11	53618037	.	T	A	.	PASS	.	intergenic	NONE,NM_001004703	dist=NONE;dist=985032	.	.	.	11q11	.	.	Score=1108;Name="777456:ALR/Alpha(Satellite)"	.	.	.	.	.	.	.	.	.	.	.	.	.	.	.	.	.	.	.	.	.	.	.	.	.	.	.	.	.	.	.	.
chr11	53785976	.	A	T	.	PASS	.	intergenic	NONE,NM_001004703	dist=NONE;dist=817093	.	.	.	11q11	.	.	Score=1108;Name="777456:ALR/Alpha(Satellite)"	.	.	.	.	.	.	.	.	.	.	.	.	.	.	.	.	.	.	.	.	.	.	.	.	.	.	.	.	.	.	.	.
chr11	53881068	.	G	C	.	PASS	.	intergenic	NONE,NM_001004703	dist=NONE;dist=722001	.	.	.	11q11	.	.	Score=1108;Name="777456:ALR/Alpha(Satellite)"	.	.	.	.	.	.	.	.	.	.	.	.	.	.	.	.	.	.	.	.	.	.	.	.	.	.	.	.	.	.	.	.
chr11	53935464	.	G	C	.	PASS	.	intergenic	NONE,NM_001004703	dist=NONE;dist=667605	.	.	.	11q11	.	.	Score=1108;Name="777456:ALR/Alpha(Satellite)"	.	.	.	.	.	.	.	.	.	.	.	.	.	.	.	.	.	.	.	.	.	.	.	.	.	.	.	.	.	.	.	.
chr11	54262882	.	A	T	.	PASS	.	intergenic	NONE,NM_001004703	dist=NONE;dist=340187	.	.	.	11q11	.	.	Score=1181;Name="777460:ALR/Alpha(Satellite)"	.	.	.	.	.	.	.	.	.	.	.	.	.	.	.	.	.	.	.	.	.	.	.	.	.	.	.	.	.	.	.	.
chr11	54300541	.	G	C	.	PASS	.	intergenic	NONE,NM_001004703	dist=NONE;dist=302528	.	.	.	11q11	.	.	Score=1181;Name="777460:ALR/Alpha(Satellite)"	.	.	.	.	.	.	.	.	.	.	.	.	.	.	.	.	.	.	.	.	.	.	.	.	.	.	.	.	.	.	.	.
chr11	54409162	.	G	T	.	PASS	.	intergenic	NONE,NM_001004703	dist=NONE;dist=193907	.	.	.	11q11	.	.	Score=1201;Name="777461:ALR/Alpha(Satellite)"	.	.	.	.	.	.	.	.	.	.	.	.	.	.	.	.	.	.	.	.	.	.	.	.	.	.	.	.	.	.	.	.
chr11	54416042	.	C	A	.	PASS	.	intergenic	NONE,NM_001004703	dist=NONE;dist=187027	.	.	.	11q11	.	.	Score=1201;Name="777461:ALR/Alpha(Satellite)"	.	.	.	.	.	.	.	.	.	.	.	.	.	.	.	.	.	.	.	.	.	.	.	.	.	.	.	.	.	.	.	.
chr11	55241659	.	C	T	.	PASS	.	intergenic	NM_001005272,NM_024114	dist=533757;dist=20523	.	.	.	11q11	.	.	Score=1335;Name="777834:ALR/Alpha(Satellite)"	.	.	.	.	.	.	.	.	.	.	.	.	.	.	.	.	.	.	.	.	.	.	.	.	.	.	.	.	.	.	.	.
chr11	55245699	.	T	A	.	PASS	.	intergenic	NM_001005272,NM_024114	dist=537797;dist=16483	.	.	.	11q11	.	.	Score=1335;Name="777834:ALR/Alpha(Satellite)"	.	.	.	.	.	.	.	.	.	.	.	.	.	.	.	.	.	.	.	.	.	.	.	.	.	.	.	.	.	.	.	.
chr11	55279622	.	G	T	.	PASS	.	intergenic	NM_024114,NR_038174	dist=8503;dist=14081	.	.	.	11q11	.	Score=0.955823;Name=chr11:55860245	.	.	.	.	.	.	.	.	.	.	.	.	.	.	.	.	.	.	.	.	.	.	.	.	.	.	.	.	.	.	.	.	.
chr11	55298271	.	T	C	.	PASS	.	upstream	NR_038174	.	.	.	.	11q11	.	Score=0.959561;Name=chr11:55874634	.	.	.	.	.	.	.	.	.	.	.	.	.	.	.	.	.	.	.	.	.	.	.	.	.	.	.	.	.	.	.	.	.
chr11	55333615	.	T	C	.	PASS	.	intergenic	NR_038174,NM_001005274	dist=35383;dist=9586	.	.	.	11q11	.	.	Score=24240;Name="777929:L1PA6(LINE)"	.	.	.	.	.	.	.	.	.	.	.	.	.	.	.	.	.	.	.	.	.	.	.	.	.	.	.	.	.	.	.	.
chr11	55902689	.	T	A	.	PASS	.	intergenic	NM_032681,NM_001001960	dist=10881;dist=10961	.	.	.	11q12.1	.	.	.	.	.	.	.	.	.	.	.	.	.	.	.	.	.	.	.	.	.	.	.	.	.	.	.	.	.	.	.	.	.	.	.
chr11	56005749	.	G	C	.	PASS	.	intergenic	NM_003697,NM_001001921	dist=11124;dist=24670	.	.	.	11q12.1	.	.	Score=16929;Name="778871:L1PA3(LINE)"	.	.	.	.	.	.	.	.	.	.	.	.	.	.	.	.	.	.	.	.	.	.	.	.	.	.	.	.	.	.	.	.
chr11	56239876	.	A	G	.	PASS	.	intergenic	NM_001004746,NM_001004747	dist=6691;dist=12324	.	.	.	11q12.1	.	.	Score=2721;Name="779202:L1PA13(LINE)"	.	.	.	.	.	.	.	.	.	.	.	.	.	.	.	.	.	.	.	.	.	.	.	.	.	.	.	.	.	.	.	.
chr11	56456672	.	A	C	.	PASS	.	intergenic	NM_001004744,NM_001004743	dist=38440;dist=5797	.	.	.	11q12.1	.	.	Score=10041;Name="779545:L1P4(LINE)"	.	.	.	.	.	.	.	.	.	.	.	.	.	.	.	.	.	.	.	.	.	.	.	.	.	.	.	.	.	.	.	.
chr11	56651142	.	A	C	.	PASS	.	intergenic	NM_001002925,NM_001004730	dist=8703;dist=12544	.	.	.	11q12.1	.	.	.	.	.	.	.	.	.	.	.	.	.	.	.	.	.	.	.	.	.	.	.	.	.	.	.	.	.	.	.	.	.	.	.
chr11	56919913	.	A	C	.	PASS	.	intergenic	NR_110137,NM_001005323	dist=41835;dist=69001	.	.	.	11q12.1	.	.	Score=11010;Name="780288:L1PA7(LINE)"	.	.	.	.	.	.	.	.	.	.	.	.	.	.	.	.	.	.	.	.	.	.	.	.	.	.	.	.	.	.	.	.
chr11	57405915	.	T	G	.	PASS	.	intergenic	NM_002728,NM_199329	dist=15258;dist=1039	.	.	ENST00000529411.1	11q12.1	.	.	Score=228;Name="781294:L2b(LINE)"	.	.	.	.	.	.	.	.	.	.	.	.	.	.	.	.	.	.	.	.	.	.	.	.	.	.	.	.	.	.	.	.
chr11	57448191	rs12422213	G	A	.	PASS	.	intergenic	NM_017611,NM_178570	dist=20611;dist=12346	.	.	.	11q12.1	.	.	Score=154;Name="781400:(AGAA)n(Simple_repeat)"	rs12422213	.	.	.	.	.	.	.	0.4583	0.4499	0.4384	0.4281	0.4352	0.441494	.	.	.	.	.	.	.	.	.	.	.	.	.	.	.	.	.	.
chr11	58129403	.	A	T	.	PASS	OR9Q1	intronic	NM_001005212	.	.	.	ENST00000335397.3	11q12.1	.	.	Score=939;Name="782991:L2a(LINE)"	.	.	.	.	.	.	.	.	.	.	.	.	.	.	.	.	.	.	.	.	.	.	.	.	.	.	.	.	.	.	.	.
chr11	58337756	.	A	C	.	PASS	.	intergenic	NM_207374,NM_001005489	dist=69496;dist=20369	.	.	.	11q12.1	.	.	Score=1331;Name="783351:MSTD(LTR)"	.	.	.	.	.	.	.	.	.	.	.	.	.	.	.	.	.	.	.	.	.	.	.	.	.	.	.	.	.	.	.	.
chr11	58370258	.	A	C	.	PASS	.	intergenic	NM_001005489,NM_001005469	dist=11189;dist=32207	.	.	.	11q12.1	.	.	Score=1277;Name="783409:L1ME1(LINE)"	.	.	.	.	.	.	.	.	.	.	.	.	.	.	.	.	.	.	.	.	.	.	.	.	.	.	.	.	.	.	.	.
chr11	58864421	.	T	G	.	PASS	.	intergenic	NM_145016,NM_001220494	dist=19897;dist=63208	.	.	.	11q12.1	.	.	Score=10041;Name="784256:L1MA8(LINE)"	.	.	.	.	.	.	.	.	.	.	.	.	.	.	.	.	.	.	.	.	.	.	.	.	.	.	.	.	.	.	.	.
chr11	58984161	.	A	C	.	PASS	LOC283194	ncRNA_intronic	NR_033853	.	.	.	ENST00000533954.5	11q12.1	.	.	Score=20772;Name="784460:L1PA6(LINE)"	.	.	.	.	.	.	.	.	.	.	.	.	.	.	.	.	.	.	.	.	.	.	.	.	.	.	.	.	.	.	.	.
chr11	59248106	.	T	G	.	PASS	.	intergenic	NM_001039396,NM_001004729	dist=35085;dist=116353	.	.	.	11q12.1	.	.	.	.	.	.	.	.	.	.	.	.	.	.	.	.	.	.	.	.	.	.	.	.	.	.	.	.	.	.	.	.	.	.	.
chr11	60650452	.	G	A	.	PASS	LINC00301	ncRNA_intronic	NR_026946	.	.	.	ENST00000527161.5,ENST00000412599.5,ENST00000320202.8	11q12.2	.	.	Score=2159;Name="787386:AluSz(SINE)"	.	.	.	.	.	.	.	.	.	.	.	.	.	.	.	.	.	.	.	.	.	.	.	.	.	.	.	.	.	.	.	.
chr11	61509764	.	T	G	.	PASS	LRRC10B	exonic	NM_001145077	.	missense SNV	LRRC10B:NM_001145077:exon1:c.T766G:p.F256V	ENST00000378075.3	11q12.2	.	.	.	.	.	.	.	.	.	.	.	.	.	.	.	.	.	.	.	.	.	.	.	.	.	.	.	.	.	.	.	.	.	.	.
chr11	61820046	.	A	C	.	PASS	FADS2	intronic	NM_001281501,NM_001281502	.	.	.	ENST00000517839.1,ENST00000257261.10,ENST00000522639.1,ENST00000522056.5,ENST00000574708.5	11q12.2	.	.	Score=1308;Name="790032:AluSx(SINE)"	.	.	.	.	.	.	.	.	.	.	.	.	.	.	.	.	.	.	.	.	.	.	.	.	.	.	.	.	.	.	.	.
chr11	61875394	.	T	G	.	PASS	FADS3	intronic	NM_021727	.	.	.	ENST00000278829.6,ENST00000527697.5,ENST00000525588.5	11q12.2	.	.	Score=37;Name="790149:(T)n(Simple_repeat)"	.	.	.	.	.	.	.	.	.	.	.	.	.	.	.	.	.	.	.	.	.	.	.	.	.	.	.	.	.	.	.	.
chr11	62317171	.	G	A	.	PASS	.	intergenic	NM_206998,NM_001083926	dist=18107;dist=20131	.	.	.	11q12.3	.	.	Score=2161;Name="791180:AluSz(SINE)"	.	.	.	.	.	.	.	.	.	.	.	.	.	.	.	.	.	.	.	.	.	.	.	.	.	.	.	.	.	.	.	.
chr11	63037162	.	G	A	.	PASS	.	intergenic	NM_004254,NM_001136506	dist=21317;dist=42778	.	.	.	11q12.3	.	.	Score=25693;Name="792956:L1PA5(LINE)"	.	.	.	.	.	.	.	.	.	.	.	.	.	.	.	.	.	.	.	.	.	.	.	.	.	.	.	.	.	.	.	.
chr11	64194933	.	G	C	.	PASS	STIP1	intronic	NM_001282652,NM_001282653,NM_006819	.	.	.	ENST00000538945.5,ENST00000305218.8,ENST00000358794.9,ENST00000543847.1	11q13.1	.	.	.	.	.	.	.	.	.	.	.	.	.	.	.	.	.	.	.	.	.	.	.	.	.	.	.	.	.	.	.	.	.	.	.
chr11	64964138	.	T	G	.	PASS	C11orf85	intronic	NM_001037225,NM_001300803,NM_001318808	.	.	.	ENST00000530444.5,ENST00000301896.5	11q13.1	.	.	Score=2155;Name="796753:AluSx(SINE)"	.	.	.	.	.	.	.	.	.	.	.	.	.	.	.	.	.	.	.	.	.	.	.	.	.	.	.	.	.	.	.	.
chr11	65622521	.	C	G	.	PASS	PCNXL3	intronic	NM_032223	.	.	.	ENST00000355703.3,ENST00000394227.7,ENST00000628801.2	11q13.1	.	.	.	.	.	.	.	.	.	.	.	.	.	.	.	.	.	.	.	.	.	.	.	.	.	.	.	.	.	.	.	.	.	.	.
chr11	65801917	.	A	C	.	PASS	.	intergenic	NM_004561,NM_152760	dist=4698;dist=32022	.	.	.	11q13.1	.	.	.	.	.	.	.	.	.	.	.	.	.	.	.	.	.	.	.	.	.	.	.	.	.	.	.	.	.	.	.	.	.	.	.
chr11	66027243	.	C	A	.	PASS	.	upstream	NM_053054	.	.	.	.	11q13.1	.	.	Score=2406;Name="799377:AluY(SINE)"	.	.	.	.	.	.	.	.	.	.	.	.	.	.	.	.	.	.	.	.	.	.	.	.	.	.	.	.	.	.	.	.
chr11	66587164	.	T	G	.	PASS	.	intergenic	NM_003793,NM_018219	dist=18588;dist=3005	.	.	.	11q13.2	.	.	Score=6391;Name="800819:SVA_F(Retroposon)"	.	.	.	.	.	.	.	.	.	.	.	.	.	.	.	.	.	.	.	.	.	.	.	.	.	.	.	.	.	.	.	.
chr11	67415902	.	T	G	.	PASS	CARNS1	intronic	NM_001166222,NM_020811	.	.	.	ENST00000307823.7,ENST00000531040.5	11q13.2	.	.	.	.	.	.	.	.	.	.	.	.	.	.	.	.	.	.	.	.	.	.	.	.	.	.	.	.	.	.	.	.	.	.	.
chr11	67707121	.	T	A	.	PASS	.	intergenic	NM_001031615,NR_024249	dist=25907;dist=84646	.	.	.	11q13.2	.	Score=0.969985;Name=chr11:67986482	Score=2219;Name="803592:AluSx1(SINE)"	.	.	.	.	.	.	.	.	.	.	.	.	.	.	.	.	.	.	.	.	.	.	.	.	.	.	.	.	.	.	.	.
chr11	67805448	.	T	G	.	PASS	.	upstream	NR_024249	.	.	.	.	11q13.2	.	Score=0.958415;Name=chr11:3400406	.	.	.	.	.	.	.	.	.	.	.	.	.	.	.	.	.	.	.	.	.	.	.	.	.	.	.	.	.	.	.	.	.
chr11	67922938	rs1814236	T	C	.	PASS	.	intergenic	NR_024249,NM_030930	dist=117602;dist=68162	.	.	.	11q13.2	.	Score=0.96866;Name=chr3:15122610	.	rs1814236	.	.	.	.	.	.	.	.	.	.	.	.	.	.	.	.	.	.	.	.	.	.	.	.	.	.	.	.	.	.	.
chr11	68046257	.	A	C	.	PASS	TCIRG1	intronic	NM_001351059,NM_006019,NM_006053	.	.	.	ENST00000265686.7,ENST00000532635.5	11q13.2	.	.	Score=813;Name="804259:FLAM_C(SINE)"	.	.	.	.	.	.	.	.	.	.	.	.	.	.	.	.	.	.	.	.	.	.	.	.	.	.	.	.	.	.	.	.
chr11	69635855	.	C	T	.	PASS	.	intergenic	NR_120542,NM_053056	dist=142312;dist=5250	.	.	.	11q13.3	.	.	.	.	.	.	.	.	.	.	.	.	.	.	.	.	.	.	.	.	.	.	.	.	.	.	.	.	.	.	.	.	.	.	.
chr11	69658421	.	T	G	.	PASS	.	intergenic	NM_053056,NM_153451	dist=3947;dist=7143	.	.	ENST00000538554.6	11q13.3	.	.	.	.	.	.	.	.	.	.	.	.	.	.	.	.	.	.	.	.	.	.	.	.	.	.	.	.	.	.	.	.	.	.	.
chr11	69972927	.	G	T	.	PASS	.	intergenic	NM_005247,NR_120530	dist=153503;dist=83303	.	.	.	11q13.3	.	.	Score=2464;Name="808355:AluSp(SINE)"	.	.	.	.	.	.	.	.	.	.	.	.	.	.	.	.	.	.	.	.	.	.	.	.	.	.	.	.	.	.	.	.
chr11	70582483	.	C	T	.	PASS	SHANK2	intronic	NM_012309,NM_133266	.	.	.	ENST00000423696.6,ENST00000357171.7,ENST00000409161.5,ENST00000449833.6,ENST00000338508.8,ENST00000601538.5,ENST00000409530.5,ENST00000449116.6	11q13.4	.	.	.	.	.	.	.	.	.	.	.	.	.	.	.	.	.	.	.	.	.	.	.	.	.	.	.	.	.	.	.	.	.	.	.
chr11	70690590	.	G	C	.	PASS	SHANK2	intronic	NM_012309	.	.	.	ENST00000423696.6,ENST00000601538.5	11q13.4	.	.	Score=576;Name="809747:AluJo(SINE)"	.	.	.	.	.	.	.	.	.	.	.	.	.	.	.	.	.	.	.	.	.	.	.	.	.	.	.	.	.	.	.	.
chr11	71417436	.	C	G	.	PASS	FLJ42102	ncRNA_intronic	NR_038862	.	.	.	.	11q13.4	.	.	Score=2391;Name="810947:AluSc8(SINE)"	.	.	.	.	.	.	.	.	.	.	.	.	.	.	.	.	.	.	.	.	.	.	.	.	.	.	.	.	.	.	.	.
chr11	71549341	.	C	T	.	PASS	KRTAP5-9	UTR3	NM_005553	NM_005553:c.*174C>T	.	.	ENST00000619191.1,ENST00000528743.3,ENST00000630219.1	11q13.4	.	.	.	.	.	.	.	.	.	.	.	.	.	.	.	.	.	.	.	.	.	.	.	.	.	.	.	.	.	.	.	.	.	.	.
chr11	71644137	.	G	C	.	PASS	.	intergenic	NM_001005405,NM_001099653	dist=61262;dist=143374	.	.	.	11q13.4	.	Score=0.962532;Name=chr3:15122610	.	.	.	.	.	.	.	.	.	.	.	.	.	.	.	.	.	.	.	.	.	.	.	.	.	.	.	.	.	.	.	.	.
chr11	72546353	.	T	A	.	PASS	.	intergenic	NM_001258394,NR_126364	dist=111669;dist=24303	.	.	.	11q13.4	.	.	.	.	.	.	.	.	.	.	.	.	.	.	.	.	.	.	.	.	.	.	.	.	.	.	.	.	.	.	.	.	.	.	.
chr11	73538606	.	G	A	.	PASS	FAM168A	intronic	NM_001286050,NM_001286051,NM_015159	.	.	.	ENST00000450446.6,ENST00000356467.4,ENST00000064778.8	11q13.4	.	.	.	.	.	.	.	.	.	.	.	.	.	.	.	.	.	.	.	.	.	.	.	.	.	.	.	.	.	.	.	.	.	.	.
chr11	73538608	.	A	T	.	PASS	FAM168A	intronic	NM_001286050,NM_001286051,NM_015159	.	.	.	ENST00000064778.8,ENST00000356467.4,ENST00000450446.6	11q13.4	.	.	.	.	.	.	.	.	.	.	.	.	.	.	.	.	.	.	.	.	.	.	.	.	.	.	.	.	.	.	.	.	.	.	.
chr11	74791500	.	A	C	.	PASS	RNF169	intronic	NM_001098638	.	.	.	ENST00000299563.4	11q13.4	.	.	Score=7198;Name="818813:MER52A(LTR)"	.	.	.	.	.	.	.	.	.	.	.	.	.	.	.	.	.	.	.	.	.	.	.	.	.	.	.	.	.	.	.	.
chr11	75150414	.	T	G	.	PASS	.	upstream	NM_001145212,NM_007256	.	.	.	.	11q13.4	.	.	Score=462;Name="819563:MIRb(SINE)"	.	.	.	.	.	.	.	.	.	.	.	.	.	.	.	.	.	.	.	.	.	.	.	.	.	.	.	.	.	.	.	.
chr11	75409720	rs370261145	C	G	.	PASS	RPS3	intronic	NM_001256802	.	.	.	ENST00000527446.5	11q13.4	.	.	Score=6324;Name="820236:SVA_E(Retroposon)"	rs370261145	.	.	.	.	.	.	.	.	.	.	.	.	.	.	.	.	.	.	.	.	.	.	.	.	.	.	.	.	.	.	.
chr11	76212805	.	C	T	.	PASS	.	intergenic	NM_004626,NM_004705	dist=6275;dist=137152	.	.	ENST00000531538.1	11q13.5	.	.	.	.	.	.	.	.	.	.	.	.	.	.	.	.	.	.	.	.	.	.	.	.	.	.	.	.	.	.	.	.	.	.	.
chr11	76280486	.	C	A	.	PASS	.	intergenic	NM_004626,NM_004705	dist=73956;dist=69471	.	.	.	11q13.5	.	.	Score=423;Name="822222:MIR(SINE)"	.	.	.	.	.	.	.	.	.	.	.	.	.	.	.	.	.	.	.	.	.	.	.	.	.	.	.	.	.	.	.	.
chr11	77447426	.	A	C	.	PASS	PAK1	intronic	NM_001128620,NM_002576	.	.	.	ENST00000356341.7,ENST00000278568.8	11q14.1	.	.	.	.	.	.	.	.	.	.	.	.	.	.	.	.	.	.	.	.	.	.	.	.	.	.	.	.	.	.	.	.	.	.	.
chr11	78030666	.	C	A	.	PASS	NDUFC2-KCTD14,KCTD14	intronic	NM_001203260,NM_001203261,NM_001203262,NM_001282406	.	.	.	ENST00000530054.1,ENST00000612612.4,ENST00000533144.1,ENST00000614236.1,ENST00000528251.1	11q14.1	.	.	.	.	.	.	.	.	.	.	.	.	.	.	.	.	.	.	.	.	.	.	.	.	.	.	.	.	.	.	.	.	.	.	.
chr11	78696954	.	C	T	.	PASS	TENM4	intronic	NM_001098816	.	.	.	ENST00000612046.4,ENST00000278550.11	11q14.1	.	.	.	.	.	.	.	.	.	.	.	.	.	.	.	.	.	.	.	.	.	.	.	.	.	.	.	.	.	.	.	.	.	.	.
chr11	80300623	.	T	C	.	PASS	.	intergenic	NM_001098816,NR_120570	dist=859972;dist=450578	.	.	.	11q14.1	.	.	.	.	.	.	.	.	.	.	.	.	.	.	.	.	.	.	.	.	.	.	.	.	.	.	.	.	.	.	.	.	.	.	.
chr11	80720882	.	T	G	.	PASS	.	intergenic	NM_001098816,NR_120570	dist=1280231;dist=30319	.	.	.	11q14.1	.	Score=0.907876;Name=chr10:36900869	.	.	.	.	.	.	.	.	.	.	.	.	.	.	.	.	.	.	.	.	.	.	.	.	.	.	.	.	.	.	.	.	.
chr11	81075773	.	T	G	.	PASS	.	intergenic	NR_120570,NR_120571	dist=312970;dist=804078	.	.	.	11q14.1	.	.	Score=3043;Name="832991:L1MA9(LINE)"	.	.	.	.	.	.	.	.	.	.	.	.	.	.	.	.	.	.	.	.	.	.	.	.	.	.	.	.	.	.	.	.
chr11	81399061	.	C	G	.	PASS	.	intergenic	NR_120570,NR_120571	dist=636258;dist=480790	.	.	.	11q14.1	.	.	.	.	.	.	.	.	.	.	.	.	.	.	.	.	.	.	.	.	.	.	.	.	.	.	.	.	.	.	.	.	.	.	.
chr11	81518689	rs74606158	C	T	.	PASS	.	intergenic	NR_120570,NR_120571	dist=755886;dist=361162	.	.	.	11q14.1	.	.	Score=29;Name="833831:(TG)n(Simple_repeat)"	rs74606158	.	.	.	.	.	.	.	.	.	.	.	.	.	.	.	.	.	.	.	.	.	.	.	.	.	.	.	.	.	.	.
chr11	81561080	.	T	G	.	PASS	.	intergenic	NR_120570,NR_120571	dist=798277;dist=318771	.	.	.	11q14.1	.	.	Score=1004;Name="833886:MLT1A0(LTR)"	.	.	.	.	.	.	.	.	.	.	.	.	.	.	.	.	.	.	.	.	.	.	.	.	.	.	.	.	.	.	.	.
chr11	81774237	.	C	A	.	PASS	.	intergenic	NR_120570,NR_120571	dist=1011434;dist=105614	.	.	.	11q14.1	.	.	Score=2193;Name="834205:AluSg4(SINE)"	.	.	.	.	.	.	.	.	.	.	.	.	.	.	.	.	.	.	.	.	.	.	.	.	.	.	.	.	.	.	.	.
chr11	81974928	.	T	A	.	PASS	MIR4300HG	ncRNA_intronic	NR_120571	.	.	.	ENST00000526154.1,ENST00000500502.5	11q14.1	.	.	Score=827;Name="834559:MER39(LTR)"	.	.	.	.	.	.	.	.	.	.	.	.	.	.	.	.	.	.	.	.	.	.	.	.	.	.	.	.	.	.	.	.
chr11	83723096	.	A	C	.	PASS	DLG2	intronic	NM_001142699,NM_001142700,NM_001206769,NM_001300983,NM_001351274,NM_001351275,NM_001351276,NM_001364	.	.	.	ENST00000376104.6,ENST00000532653.5,ENST00000524982.5,ENST00000531015.5,ENST00000533669.5,ENST00000280241.12,ENST00000398309.6,ENST00000330014.10,ENST00000418306.6,ENST00000530800.5	11q14.1	.	.	.	.	.	.	.	.	.	.	.	.	.	.	.	.	.	.	.	.	.	.	.	.	.	.	.	.	.	.	.	.	.	.	.
chr11	83873385	.	A	C	.	PASS	DLG2	intronic	NM_001142699,NM_001142700,NM_001206769,NM_001300983,NM_001351274,NM_001351275,NM_001351276,NM_001364	.	.	.	ENST00000280241.12,ENST00000531015.5,ENST00000524982.5,ENST00000398301.6,ENST00000532653.5,ENST00000376104.6,ENST00000418306.6,ENST00000330014.10,ENST00000398309.6	11q14.1	.	.	Score=1929;Name="838335:THE1B(LTR)"	.	.	.	.	.	.	.	.	.	.	.	.	.	.	.	.	.	.	.	.	.	.	.	.	.	.	.	.	.	.	.	.
chr11	84000379	.	A	G	.	PASS	DLG2	intronic	NM_001142699,NM_001142700,NM_001206769,NM_001300983,NM_001351274,NM_001351275,NM_001351276,NM_001364	.	.	.	ENST00000532653.5,ENST00000376104.6,ENST00000398301.6,ENST00000524982.5,ENST00000531015.5,ENST00000280241.12,ENST00000398309.6,ENST00000330014.10,ENST00000418306.6	11q14.1	.	.	Score=5884;Name="838545:L1MA4A(LINE)"	.	.	.	.	.	.	.	.	.	.	.	.	.	.	.	.	.	.	.	.	.	.	.	.	.	.	.	.	.	.	.	.
chr11	84038282	.	A	G	.	PASS	DLG2	intronic	NM_001142699,NM_001142700,NM_001206769,NM_001300983,NM_001351274,NM_001351275,NM_001351276,NM_001364	.	.	.	ENST00000280241.12,ENST00000531015.5,ENST00000524982.5,ENST00000532653.5,ENST00000376104.6,ENST00000398301.6,ENST00000418306.6,ENST00000330014.10,ENST00000398309.6	11q14.1	.	.	Score=1576;Name="838604:L1PREC2(LINE)"	.	.	.	.	.	.	.	.	.	.	.	.	.	.	.	.	.	.	.	.	.	.	.	.	.	.	.	.	.	.	.	.
chr11	84107898	.	G	T	.	PASS	DLG2	intronic	NM_001142699,NM_001142700,NM_001206769,NM_001300983,NM_001351274,NM_001351275,NM_001351276,NM_001364	.	.	.	ENST00000280241.12,ENST00000531015.5,ENST00000524982.5,ENST00000398301.6,ENST00000376104.6,ENST00000532653.5,ENST00000418306.6,ENST00000398309.6,ENST00000330014.10	11q14.1	.	.	.	.	.	.	.	.	.	.	.	.	.	.	.	.	.	.	.	.	.	.	.	.	.	.	.	.	.	.	.	.	.	.	.
chr11	84364440	.	A	G	.	PASS	DLG2	intronic	NM_001142699,NM_001300983,NM_001351274,NM_001351275,NM_001351276,NM_001364	.	.	.	ENST00000398309.6,ENST00000376104.6,ENST00000532653.5,ENST00000524982.5	11q14.1	.	.	Score=21050;Name="839228:L1PA3(LINE)"	.	.	.	.	.	.	.	.	.	.	.	.	.	.	.	.	.	.	.	.	.	.	.	.	.	.	.	.	.	.	.	.
chr11	84482335	.	C	G	.	PASS	DLG2	intronic	NM_001142699,NM_001300983,NM_001351274,NM_001351275,NM_001351276,NM_001364	.	.	.	ENST00000398309.6,ENST00000376104.6,ENST00000532653.5,ENST00000524982.5	11q14.1	.	.	.	.	.	.	.	.	.	.	.	.	.	.	.	.	.	.	.	.	.	.	.	.	.	.	.	.	.	.	.	.	.	.	.
chr11	84811522	.	T	G	.	PASS	DLG2	intronic	NM_001142699,NM_001300983,NM_001351274,NM_001351275,NM_001364	.	.	.	ENST00000398309.6,ENST00000376104.6,ENST00000532653.5,ENST00000524982.5	11q14.1	.	.	.	.	.	.	.	.	.	.	.	.	.	.	.	.	.	.	.	.	.	.	.	.	.	.	.	.	.	.	.	.	.	.	.
chr11	84919090	.	T	G	.	PASS	DLG2	intronic	NM_001142699,NM_001300983,NM_001351274,NM_001351275,NM_001364	.	.	.	ENST00000524982.5,ENST00000532653.5,ENST00000376104.6,ENST00000398309.6	11q14.1	.	.	.	.	.	.	.	.	.	.	.	.	.	.	.	.	.	.	.	.	.	.	.	.	.	.	.	.	.	.	.	.	.	.	.
chr11	85793037	rs201265409	A	G	.	PASS	SYTL2	intronic	NM_001289608,NM_032943	.	.	.	ENST00000527523.5,ENST00000389960.8,ENST00000316356.8	11q14.1	.	.	Score=6767;Name="841793:L1PA3(LINE)"	rs201265409	.	.	.	.	.	.	.	.	.	.	.	.	.	.	.	.	.	.	.	.	.	.	.	.	.	.	.	.	.	.	.
chr11	86164651	.	G	C	.	PASS	.	intergenic	NM_001206947,NM_003797	dist=94770;dist=79733	.	.	.	11q14.2	.	.	Score=550;Name="842573:L2c(LINE)"	.	.	.	.	.	.	.	.	.	.	.	.	.	.	.	.	.	.	.	.	.	.	.	.	.	.	.	.	.	.	.	.
chr11	86245121	.	T	G	.	PASS	EED	UTR5	NM_001308007,NM_001330334,NM_003797	NM_001308007:c.-109T>G;NM_001330334:c.-109T>G;NM_003797:c.-109T>G	.	.	ENST00000263360.10,ENST00000528180.5	11q14.2	.	.	Score=15;Name="842766:(CGG)n(Simple_repeat)"	.	.	.	.	.	.	.	.	.	.	.	.	.	.	.	.	.	.	.	.	.	.	.	.	.	.	.	.	.	.	.	.
chr11	86600922	.	A	G	.	PASS	ME3	intronic	NM_001014811,NM_001161586,NM_006680	.	.	.	ENST00000393324.7,ENST00000524610.1,ENST00000323418.10,ENST00000543262.5	11q14.2	.	.	Score=27647;Name="843483:L1PA3(LINE)"	.	.	.	.	.	.	.	.	.	.	.	.	.	.	.	.	.	.	.	.	.	.	.	.	.	.	.	.	.	.	.	.
chr11	86616321	.	T	C	.	PASS	ME3	intronic	NM_001014811,NM_001161586,NM_006680	.	.	.	ENST00000393324.7,ENST00000524610.1,ENST00000543262.5,ENST00000323418.10	11q14.2	.	.	Score=366;Name="843509:L1ME4c(LINE)"	.	.	.	.	.	.	.	.	.	.	.	.	.	.	.	.	.	.	.	.	.	.	.	.	.	.	.	.	.	.	.	.
chr11	87277201	.	A	C	.	PASS	TMEM135	intronic	NM_001168724,NM_022918	.	.	.	ENST00000532959.5,ENST00000340353.11,ENST00000305494.5	11q14.2	.	.	Score=2166;Name="844800:AluSz6(SINE)"	.	.	.	.	.	.	.	.	.	.	.	.	.	.	.	.	.	.	.	.	.	.	.	.	.	.	.	.	.	.	.	.
chr11	87556789	.	G	C	.	PASS	.	intergenic	NM_001168724,NR_135090	dist=227955;dist=161565	.	.	.	11q14.2	.	.	.	.	.	.	.	.	.	.	.	.	.	.	.	.	.	.	.	.	.	.	.	.	.	.	.	.	.	.	.	.	.	.	.
chr11	87705593	rs200466563	T	G	.	PASS	.	intergenic	NM_001168724,NR_135090	dist=376759;dist=12761	.	.	.	11q14.2	.	.	Score=2030;Name="845547:AluSz(SINE)"	rs200466563	.	.	.	.	.	.	.	0.999	0.9806	0.9851	0.9576	0.9712	0.977835	.	.	.	.	.	.	.	.	.	.	.	.	.	.	.	.	.	.
chr11	88788948	.	A	T	.	PASS	GRM5	intronic	NM_000842,NM_001143831	.	.	.	ENST00000305447.4,ENST00000305432.9,ENST00000455756.6	11q14.3	.	.	.	.	.	.	.	.	.	.	.	.	.	.	.	.	.	.	.	.	.	.	.	.	.	.	.	.	.	.	.	.	.	.	.
chr11	88941360	.	C	A	.	PASS	GRM5	intronic	NM_000842,NM_001143831	.	.	.	ENST00000455756.6,ENST00000305432.9,ENST00000305447.4	11q14.3	.	Score=0.967637;Name=chr11:49465497	Score=957;Name="847660:L1MC4(LINE)"	.	.	.	.	.	.	.	.	.	.	.	.	.	.	.	.	.	.	.	.	.	.	.	.	.	.	.	.	.	.	.	.
chr11	89463517	.	A	C	.	PASS	NOX4	intronic	NM_001143836,NM_001143837,NM_001291926,NM_001291927,NM_001291929,NM_001300995,NM_016931	.	.	.	ENST00000263317.8,ENST00000525196.5,ENST00000527626.5,ENST00000527956.5,ENST00000532825.5,ENST00000375979.7,ENST00000343727.9,ENST00000534731.5,ENST00000531342.5,ENST00000528341.5,ENST00000424319.5	11q14.3	.	.	.	.	.	.	.	.	.	.	.	.	.	.	.	.	.	.	.	.	.	.	.	.	.	.	.	.	.	.	.	.	.	.	.
chr11	89644258	.	T	G	.	PASS	.	intergenic	NM_001143837,NM_153696	dist=54647;dist=15039	.	.	.	11q14.3	.	Score=0.971253;Name=chr11:49144623	.	.	.	.	.	.	.	.	.	.	.	.	.	.	.	.	.	.	.	.	.	.	.	.	.	.	.	.	.	.	.	.	.
chr11	89752380	.	C	A	.	PASS	.	intergenic	NM_001146162,NM_020358	dist=34508;dist=45275	.	.	.	11q14.3	.	Score=0.996016;Name=chr11:89923848	.	.	.	.	.	.	.	.	.	.	.	.	.	.	.	.	.	.	.	.	.	.	.	.	.	.	.	.	.	.	.	.	.
chr11	90118716	.	G	C	.	PASS	.	intergenic	NM_001143975,NM_001300930	dist=31585;dist=15934	.	.	.	11q14.3	.	.	.	.	.	.	.	.	.	.	.	.	.	.	.	.	.	.	.	.	.	.	.	.	.	.	.	.	.	.	.	.	.	.	.
chr11	90399177	.	C	T	.	PASS	DISC1FP1	ncRNA_intronic	NR_104190	.	.	.	ENST00000562245.5,ENST00000561596.5	11q14.3	.	.	Score=8483;Name="850142:L1P1(LINE)"	.	.	.	.	.	.	.	.	.	.	.	.	.	.	.	.	.	.	.	.	.	.	.	.	.	.	.	.	.	.	.	.
chr11	91039955	.	G	C	.	PASS	.	intergenic	NR_104190,NM_001008781	dist=124903;dist=1312141	.	.	.	11q14.3	.	.	Score=2211;Name="851190:AluSc5(SINE)"	.	.	.	.	.	.	.	.	.	.	.	.	.	.	.	.	.	.	.	.	.	.	.	.	.	.	.	.	.	.	.	.
chr11	91664404	.	A	C	.	PASS	.	intergenic	NR_104190,NM_001008781	dist=749352;dist=687692	.	.	.	11q14.3	.	.	Score=524;Name="852191:MIR(SINE)"	.	.	.	.	.	.	.	.	.	.	.	.	.	.	.	.	.	.	.	.	.	.	.	.	.	.	.	.	.	.	.	.
chr11	91733640	.	G	T	.	PASS	.	intergenic	NR_104190,NM_001008781	dist=818588;dist=618456	.	.	.	11q14.3	.	.	Score=2185;Name="852306:THE1B(LTR)"	.	.	.	.	.	.	.	.	.	.	.	.	.	.	.	.	.	.	.	.	.	.	.	.	.	.	.	.	.	.	.	.
chr11	91921119	.	C	A	.	PASS	.	intergenic	NR_104190,NM_001008781	dist=1006067;dist=430977	.	.	.	11q14.3	.	.	Score=2226;Name="852638:AluSx1(SINE)"	.	.	.	.	.	.	.	.	.	.	.	.	.	.	.	.	.	.	.	.	.	.	.	.	.	.	.	.	.	.	.	.
chr11	92382134	.	T	G	.	PASS	FAT3	intronic	NM_001008781	.	.	.	ENST00000409404.6,ENST00000525166.5	11q14.3	.	.	.	.	.	.	.	.	.	.	.	.	.	.	.	.	.	.	.	.	.	.	.	.	.	.	.	.	.	.	.	.	.	.	.
chr11	92436946	.	G	C	.	PASS	FAT3	intronic	NM_001008781	.	.	.	ENST00000525166.5,ENST00000409404.6	11q14.3	.	.	.	.	.	.	.	.	.	.	.	.	.	.	.	.	.	.	.	.	.	.	.	.	.	.	.	.	.	.	.	.	.	.	.
chr11	92651354	.	T	C	.	PASS	FAT3	intronic	NM_001008781	.	.	.	ENST00000525166.5,ENST00000409404.6	11q14.3	.	.	.	.	.	.	.	.	.	.	.	.	.	.	.	.	.	.	.	.	.	.	.	.	.	.	.	.	.	.	.	.	.	.	.
chr11	94820041	.	A	T	.	PASS	AMOTL1	intronic	NM_001301007,NM_130847	.	.	.	ENST00000317829.12,ENST00000433060.2	11q21	.	.	Score=231;Name="857737:L2a(LINE)"	.	.	.	.	.	.	.	.	.	.	.	.	.	.	.	.	.	.	.	.	.	.	.	.	.	.	.	.	.	.	.	.
chr11	94861889	.	A	G	.	PASS	AMOTL1	intronic	NM_001301007,NM_130847	.	.	.	ENST00000433060.2,ENST00000317829.12	11q21	.	.	.	.	.	.	.	.	.	.	.	.	.	.	.	.	.	.	.	.	.	.	.	.	.	.	.	.	.	.	.	.	.	.	.
chr11	95540815	.	A	C	.	PASS	.	intergenic	NR_110295,NM_144664	dist=306411;dist=228127	.	.	.	11q21	.	.	Score=3622;Name="858978:L1PA16(LINE)"	.	.	.	.	.	.	.	.	.	.	.	.	.	.	.	.	.	.	.	.	.	.	.	.	.	.	.	.	.	.	.	.
chr11	96342219	.	A	C	.	PASS	MAML2	UTR5	NM_032427	NM_032427:c.-324T>G	.	.	ENST00000524717.5	11q21	.	.	.	.	.	.	.	.	.	.	.	.	.	.	.	.	.	.	.	.	.	.	.	.	.	.	.	.	.	.	.	.	.	.	.
chr11	96487424	rs188180415	T	G	.	PASS	JRKL-AS1	ncRNA_intronic	NR_047481	.	.	.	ENST00000511243.2	11q21	.	.	Score=22053;Name="860614:L1PA6(LINE)"	rs188180415	.	.	.	.	.	.	.	.	0.0082	0.003	.	0.0014	0.00239617	.	.	.	.	.	.	.	.	.	.	.	.	.	.	.	.	.	.
chr11	96704219	.	G	T	.	PASS	.	intergenic	NR_135097,NONE	dist=189469;dist=NONE	.	.	ENST00000527528.1	11q21	.	.	Score=310;Name="860909:MIR(SINE)"	.	.	.	.	.	.	.	.	.	.	.	.	.	.	.	.	.	.	.	.	.	.	.	.	.	.	.	.	.	.	.	.
chr11	97246218	.	C	A	.	PASS	.	intergenic	NR_135097,NM_001243271	dist=731468;dist=1774758	.	.	ENST00000529088.1	11q21	.	.	Score=12198;Name="861672:L1PB4(LINE)"	.	.	.	.	.	.	.	.	.	.	.	.	.	.	.	.	.	.	.	.	.	.	.	.	.	.	.	.	.	.	.	.
chr11	97259547	.	A	G	.	PASS	.	intergenic	NR_135097,NM_001243271	dist=744797;dist=1761429	.	.	ENST00000529088.1	11q21	.	.	Score=2038;Name="861690:FordPrefect(DNA)"	.	.	.	.	.	.	.	.	.	.	.	.	.	.	.	.	.	.	.	.	.	.	.	.	.	.	.	.	.	.	.	.
chr11	97932314	.	A	G	.	PASS	.	intergenic	NR_135097,NM_001243271	dist=1417564;dist=1088662	.	.	ENST00000526385.5,ENST00000527281.1	11q22.1	.	.	.	.	.	.	.	.	.	.	.	.	.	.	.	.	.	.	.	.	.	.	.	.	.	.	.	.	.	.	.	.	.	.	.
chr11	98043008	.	A	T	.	PASS	.	intergenic	NR_135097,NM_001243271	dist=1528258;dist=977968	.	.	.	11q22.1	.	.	Score=1215;Name="862891:AluJb(SINE)"	.	.	.	.	.	.	.	.	.	.	.	.	.	.	.	.	.	.	.	.	.	.	.	.	.	.	.	.	.	.	.	.
chr11	98169592	.	A	C	.	PASS	.	intergenic	NR_135097,NM_001243271	dist=1654842;dist=851384	.	.	.	11q22.1	.	.	Score=8130;Name="863132:L1PA16(LINE)"	.	.	.	.	.	.	.	.	.	.	.	.	.	.	.	.	.	.	.	.	.	.	.	.	.	.	.	.	.	.	.	.
chr11	98271773	.	C	G	.	PASS	.	intergenic	NR_135097,NM_001243271	dist=1757023;dist=749203	.	.	.	11q22.1	.	.	Score=2649;Name="863320:L1MB8(LINE)"	.	.	.	.	.	.	.	.	.	.	.	.	.	.	.	.	.	.	.	.	.	.	.	.	.	.	.	.	.	.	.	.
chr11	98928012	.	T	A	.	PASS	.	intergenic	NONE,NM_001243271	dist=NONE;dist=92964	.	.	.	11q22.1	.	.	Score=301;Name="864426:L1MCc(LINE)"	.	.	.	.	.	.	.	.	.	.	.	.	.	.	.	.	.	.	.	.	.	.	.	.	.	.	.	.	.	.	.	.
chr11	99196785	.	A	C	.	PASS	CNTN5	intronic	NM_001243270,NM_001243271,NM_014361	.	.	.	ENST00000524871.5,ENST00000527185.5,ENST00000528682.5	11q22.1	.	.	.	.	.	.	.	.	.	.	.	.	.	.	.	.	.	.	.	.	.	.	.	.	.	.	.	.	.	.	.	.	.	.	.
chr11	99399757	.	A	C	.	PASS	CNTN5	intronic	NM_001243270,NM_001243271,NM_014361	.	.	.	ENST00000524871.5,ENST00000527185.5,ENST00000528682.5	11q22.1	.	.	.	.	.	.	.	.	.	.	.	.	.	.	.	.	.	.	.	.	.	.	.	.	.	.	.	.	.	.	.	.	.	.	.
chr11	99903202	.	A	G	.	PASS	CNTN5	intronic	NM_001243270,NM_001243271,NM_014361,NM_175566	.	.	.	ENST00000418526.6,ENST00000279463.7,ENST00000528682.5,ENST00000619298.1,ENST00000527185.5,ENST00000524871.5	11q22.1	.	.	.	.	.	.	.	.	.	.	.	.	.	.	.	.	.	.	.	.	.	.	.	.	.	.	.	.	.	.	.	.	.	.	.
chr11	100903045	rs975907149	T	G	.	PASS	ARHGAP42	intronic	NM_152432	.	.	.	ENST00000524892.6,ENST00000298815.12	11q22.1	.	.	Score=413;Name="867431:LTR16D(LTR)"	rs975907149	.	.	.	.	.	.	.	.	.	.	.	.	.	.	.	.	.	.	.	.	.	.	.	.	.	.	.	.	.	.	.
chr11	101469138	.	T	G	.	PASS	TRPC6	intronic	NM_004621	.	.	.	ENST00000344327.7,ENST00000532133.5,ENST00000348423.8,ENST00000360497.4	11q22.1	.	.	.	.	.	.	.	.	.	.	.	.	.	.	.	.	.	.	.	.	.	.	.	.	.	.	.	.	.	.	.	.	.	.	.
chr11	101679829	.	G	C	.	PASS	.	intergenic	NM_004621,NM_178127	dist=95901;dist=210845	.	.	.	11q22.1	.	.	Score=25610;Name="868675:L1PA3(LINE)"	.	.	.	.	.	.	.	.	.	.	.	.	.	.	.	.	.	.	.	.	.	.	.	.	.	.	.	.	.	.	.	.
chr11	103130187	rs1004537132	G	A	.	PASS	DYNC2H1	intronic	NM_001080463,NM_001377	.	.	.	ENST00000398093.7,ENST00000334267.11,ENST00000375735.6	11q22.3	.	.	Score=2719;Name="871506:MER68(LTR)"	rs1004537132	.	.	.	.	.	.	.	.	.	.	.	.	.	.	.	.	.	.	.	.	.	.	.	.	.	.	.	.	.	.	.
chr11	104147884	.	G	A	.	PASS	PDGFD	intronic	NM_025208,NM_033135	.	.	.	ENST00000302251.9,ENST00000393158.6	11q22.3	.	.	.	.	.	.	.	.	.	.	.	.	.	.	.	.	.	.	.	.	.	.	.	.	.	.	.	.	.	.	.	.	.	.	.
chr11	104237935	.	A	C	.	PASS	.	intergenic	NM_033135,NR_106987	dist=73636;dist=14656	.	.	.	11q22.3	.	.	.	.	.	.	.	.	.	.	.	.	.	.	.	.	.	.	.	.	.	.	.	.	.	.	.	.	.	.	.	.	.	.	.
chr11	104313292	.	A	C	.	PASS	.	intergenic	NR_106987,NR_120585	dist=60641;dist=255197	.	.	.	11q22.3	.	.	Score=3067;Name="873437:L1PREC2(LINE)"	.	.	.	.	.	.	.	.	.	.	.	.	.	.	.	.	.	.	.	.	.	.	.	.	.	.	.	.	.	.	.	.
chr11	104598109	.	G	A	.	PASS	LOC102723895	ncRNA_intronic	NR_120585	.	.	.	ENST00000536529.5,ENST00000545630.1	11q22.3	.	.	Score=4876;Name="873947:L1MC(LINE)"	.	.	.	.	.	.	.	.	.	.	.	.	.	.	.	.	.	.	.	.	.	.	.	.	.	.	.	.	.	.	.	.
chr11	105559886	.	C	A	.	PASS	.	intergenic	NM_021571,NM_000829	dist=420152;dist=50187	.	.	.	11q22.3	.	.	Score=245;Name="875480:L3(LINE)"	.	.	.	.	.	.	.	.	.	.	.	.	.	.	.	.	.	.	.	.	.	.	.	.	.	.	.	.	.	.	.	.
chr11	106427533	.	A	C	.	PASS	.	intergenic	NR_120551,NM_000855	dist=162628;dist=246479	.	.	.	11q22.3	.	.	.	.	.	.	.	.	.	.	.	.	.	.	.	.	.	.	.	.	.	.	.	.	.	.	.	.	.	.	.	.	.	.	.
chr11	106458711	.	G	C	.	PASS	.	intergenic	NR_120551,NM_000855	dist=193806;dist=215301	.	.	.	11q22.3	.	.	.	.	.	.	.	.	.	.	.	.	.	.	.	.	.	.	.	.	.	.	.	.	.	.	.	.	.	.	.	.	.	.	.
chr11	107231944	.	A	G	.	PASS	.	intergenic	NM_000855,NM_152434	dist=213499;dist=94402	.	.	.	11q22.3	.	.	Score=3361;Name="878210:MLT2A1(LTR)"	.	.	.	.	.	.	.	.	.	.	.	.	.	.	.	.	.	.	.	.	.	.	.	.	.	.	.	.	.	.	.	.
chr11	109261849	.	T	A	.	PASS	.	intergenic	NM_004398,NM_207645	dist=320919;dist=160271	.	.	.	11q22.3	.	.	Score=8261;Name="882479:L1MA10(LINE)"	.	.	.	.	.	.	.	.	.	.	.	.	.	.	.	.	.	.	.	.	.	.	.	.	.	.	.	.	.	.	.	.
chr11	109550237	.	T	G	.	PASS	.	intergenic	NM_207645,NM_033390	dist=121070;dist=543124	.	.	ENST00000532992.5,ENST00000532929.1	11q22.3	.	.	Score=2320;Name="882982:AluY(SINE)"	.	.	.	.	.	.	.	.	.	.	.	.	.	.	.	.	.	.	.	.	.	.	.	.	.	.	.	.	.	.	.	.
chr11	109760107	rs938888636	T	A	.	PASS	.	intergenic	NM_207645,NM_033390	dist=330940;dist=333254	.	.	ENST00000534252.2	11q22.3	.	.	.	rs938888636	.	.	.	.	.	.	.	.	.	.	.	.	.	.	.	.	.	.	.	.	.	.	.	.	.	.	.	.	.	.	.
chr11	110509519	.	C	G	.	PASS	.	intergenic	NM_004109,NM_001258415	dist=44635;dist=67516	.	.	.	11q22.3	.	.	.	.	.	.	.	.	.	.	.	.	.	.	.	.	.	.	.	.	.	.	.	.	.	.	.	.	.	.	.	.	.	.	.
chr11	110622275	.	A	C	.	PASS	ARHGAP20	intronic	NM_001258415,NM_001258416,NM_001258417,NM_001258418,NM_020809	.	.	.	ENST00000533353.5,ENST00000527598.1,ENST00000260283.8,ENST00000524756.5,ENST00000528829.5	11q23.1	.	.	Score=3973;Name="884929:L1MEf(LINE)"	.	.	.	.	.	.	.	.	.	.	.	.	.	.	.	.	.	.	.	.	.	.	.	.	.	.	.	.	.	.	.	.
chr11	110769709	.	T	C	.	PASS	.	intergenic	NM_001258418,NM_198498	dist=56520;dist=486273	.	.	.	11q23.1	.	.	Score=8058;Name="885203:L1PA11(LINE)"	.	.	.	.	.	.	.	.	.	.	.	.	.	.	.	.	.	.	.	.	.	.	.	.	.	.	.	.	.	.	.	.
chr11	112182651	.	T	G	.	PASS	BCO2	intronic	NM_001037290,NM_001256397,NM_001256398,NM_001256400,NM_031938	.	.	.	ENST00000532699.1,ENST00000526088.5,ENST00000532593.5,ENST00000438022.5,ENST00000361053.8,ENST00000357685.9,ENST00000531169.5	11q23.1	.	Score=0.950605;Name=chrX:105405512	Score=6939;Name="888006:L1PA5(LINE)"	.	.	.	.	.	.	.	.	.	.	.	.	.	.	.	.	.	.	.	.	.	.	.	.	.	.	.	.	.	.	.	.
chr11	112215532	.	A	C	.	PASS	BCO2	intronic	NM_001037290,NM_001256397,NM_001256398,NM_001256400,NM_031938	.	.	.	ENST00000532593.5,ENST00000438022.5,ENST00000526088.5,ENST00000357685.9,ENST00000531169.5,ENST00000361053.8	11q23.1	.	.	Score=2326;Name="888094:AluSc5(SINE)"	.	.	.	.	.	.	.	.	.	.	.	.	.	.	.	.	.	.	.	.	.	.	.	.	.	.	.	.	.	.	.	.
chr11	113448695	.	C	G	.	PASS	DRD2	intronic	NM_000795,NM_016574	.	.	.	ENST00000362072.7,ENST00000346454.7	11q23.2	.	.	.	.	.	.	.	.	.	.	.	.	.	.	.	.	.	.	.	.	.	.	.	.	.	.	.	.	.	.	.	.	.	.	.
chr11	114000432	.	T	G	.	PASS	.	intergenic	NM_000869,NM_006006	dist=10120;dist=59277	.	.	.	11q23.2	.	.	.	.	.	.	.	.	.	.	.	.	.	.	.	.	.	.	.	.	.	.	.	.	.	.	.	.	.	.	.	.	.	.	.
chr11	114060613	.	T	G	.	PASS	ZBTB16	intronic	NM_001018011,NM_006006	.	.	.	ENST00000335953.8,ENST00000392996.2	11q23.2	.	.	.	.	.	.	.	.	.	.	.	.	.	.	.	.	.	.	.	.	.	.	.	.	.	.	.	.	.	.	.	.	.	.	.
chr11	114267172	.	A	C	.	PASS	.	intergenic	NM_006006,NM_006169	dist=16497;dist=28641	.	.	ENST00000535401.5,ENST00000544925.1	11q23.2	.	.	Score=2304;Name="891847:AluSx(SINE)"	.	.	.	.	.	.	.	.	.	.	.	.	.	.	.	.	.	.	.	.	.	.	.	.	.	.	.	.	.	.	.	.
chr11	114366398	rs1036333125	G	A	.	PASS	LOC101928940	ncRNA_intronic	NR_120567	.	.	.	ENST00000534904.2	11q23.2	.	.	.	rs1036333125	.	.	.	.	.	.	.	.	.	.	.	.	.	.	.	.	.	.	.	.	.	.	.	.	.	.	.	.	.	.	.
chr11	115491969	.	A	G	.	PASS	CADM1	intronic	NM_001098517,NM_001301043,NM_001301044,NM_001301045,NM_014333	.	.	.	ENST00000331581.10,ENST00000542447.6,ENST00000537058.5,ENST00000452722.7,ENST00000536727.5	11q23.3	.	.	Score=3235;Name="893905:L1PA6(LINE)"	.	.	.	.	.	.	.	.	.	.	.	.	.	.	.	.	.	.	.	.	.	.	.	.	.	.	.	.	.	.	.	.
chr11	115829985	.	T	A	.	PASS	.	intergenic	NR_034148,NR_135069	dist=69785;dist=809437	.	.	ENST00000539305.1	11q23.3	.	.	Score=4675;Name="894585:L1MD2(LINE)"	.	.	.	.	.	.	.	.	.	.	.	.	.	.	.	.	.	.	.	.	.	.	.	.	.	.	.	.	.	.	.	.
chr11	115859672	.	C	A	.	PASS	.	intergenic	NR_034148,NR_135069	dist=99472;dist=779750	.	.	.	11q23.3	.	.	Score=4122;Name="894640:L1ME3(LINE)"	.	.	.	.	.	.	.	.	.	.	.	.	.	.	.	.	.	.	.	.	.	.	.	.	.	.	.	.	.	.	.	.
chr11	116569576	.	G	C	.	PASS	.	intergenic	NR_034148,NR_135069	dist=809376;dist=69846	.	.	.	11q23.3	.	.	.	.	.	.	.	.	.	.	.	.	.	.	.	.	.	.	.	.	.	.	.	.	.	.	.	.	.	.	.	.	.	.	.
chr11	116692514	.	A	C	.	PASS	.	intergenic	NR_135069,NM_001159736	dist=34262;dist=55656	.	.	.	11q23.3	.	.	.	.	.	.	.	.	.	.	.	.	.	.	.	.	.	.	.	.	.	.	.	.	.	.	.	.	.	.	.	.	.	.	.
chr11	117405612	.	C	G	.	PASS	CEP164	intronic	NM_001271933,NM_014956	.	.	.	ENST00000278935.7	11q23.3	.	.	Score=21405;Name="897892:L1PA7(LINE)"	.	.	.	.	.	.	.	.	.	.	.	.	.	.	.	.	.	.	.	.	.	.	.	.	.	.	.	.	.	.	.	.
chr11	118420879	.	T	G	.	PASS	.	intergenic	NR_046369,NM_001197104	dist=2064;dist=15611	.	.	ENST00000524422.1	11q23.3	.	.	Score=2321;Name="899949:AluSx(SINE)"	.	.	.	.	.	.	.	.	.	.	.	.	.	.	.	.	.	.	.	.	.	.	.	.	.	.	.	.	.	.	.	.
chr11	118762183	.	T	G	.	PASS	DDX6	intronic	NM_001257191,NM_004397	.	.	.	ENST00000617381.4,ENST00000534980.5,ENST00000526070.2,ENST00000620157.4	11q23.3	.	.	Score=2099;Name="900715:AluSz6(SINE)"	.	.	.	.	.	.	.	.	.	.	.	.	.	.	.	.	.	.	.	.	.	.	.	.	.	.	.	.	.	.	.	.
chr11	119512734	.	T	G	.	PASS	.	intergenic	NR_034160,NM_203285	dist=13501;dist=125364	.	.	ENST00000500970.5	11q23.3	.	.	Score=473;Name="902515:L2b(LINE)"	.	.	.	.	.	.	.	.	.	.	.	.	.	.	.	.	.	.	.	.	.	.	.	.	.	.	.	.	.	.	.	.
chr11	119729491	.	A	C	.	PASS	.	upstream	NM_002855,NM_203285,NM_203286,NR_120587	.	.	.	.	11q23.3	.	.	.	.	.	.	.	.	.	.	.	.	.	.	.	.	.	.	.	.	.	.	.	.	.	.	.	.	.	.	.	.	.	.	.
chr11	121276874	.	T	G	.	PASS	.	intergenic	NM_005422,NM_006918	dist=86068;dist=15805	.	.	.	11q23.3	.	.	Score=19607;Name="905879:L1PB2(LINE)"	.	.	.	.	.	.	.	.	.	.	.	.	.	.	.	.	.	.	.	.	.	.	.	.	.	.	.	.	.	.	.	.
chr11	121387863	.	G	C	.	PASS	.	intergenic	NM_006918,NM_003105	dist=74453;dist=64340	.	.	.	11q24.1	.	.	Score=4381;Name="906078:L1PB1(LINE)"	.	.	.	.	.	.	.	.	.	.	.	.	.	.	.	.	.	.	.	.	.	.	.	.	.	.	.	.	.	.	.	.
chr11	122778059	.	A	G	.	PASS	UBASH3B	intronic	NM_032873	.	.	.	ENST00000284273.5	11q24.1	.	.	.	.	.	.	.	.	.	.	.	.	.	.	.	.	.	.	.	.	.	.	.	.	.	.	.	.	.	.	.	.	.	.	.
chr11	124802443	.	A	C	.	PASS	LOC100507283	ncRNA_intronic	NR_103862	.	.	.	ENST00000529392.1,ENST00000499143.6	11q24.2	.	.	Score=2050;Name="912630:AluJb(SINE)"	.	.	.	.	.	.	.	.	.	.	.	.	.	.	.	.	.	.	.	.	.	.	.	.	.	.	.	.	.	.	.	.
chr11	125278216	.	C	A	.	PASS	PKNOX2	intronic	NM_022062	.	.	.	ENST00000298282.13	11q24.2	.	.	Score=2070;Name="913431:AluJb(SINE)"	.	.	.	.	.	.	.	.	.	.	.	.	.	.	.	.	.	.	.	.	.	.	.	.	.	.	.	.	.	.	.	.
chr11	125864145	.	C	T	.	PASS	.	intergenic	NM_001144874,NM_145014	dist=24073;dist=19469	.	.	.	11q24.2	.	.	Score=6546;Name="914540:SVA_F(Retroposon)"	.	.	.	.	.	.	.	.	.	.	.	.	.	.	.	.	.	.	.	.	.	.	.	.	.	.	.	.	.	.	.	.
chr11	125899338	.	T	G	.	PASS	HYLS1,PUS3	intronic	NM_001134793,NM_001271985,NM_031307,NM_145014	.	.	.	ENST00000526028.1,ENST00000356438.7,ENST00000425380.6,ENST00000613398.4,ENST00000227474.7	11q24.2	.	.	.	.	.	.	.	.	.	.	.	.	.	.	.	.	.	.	.	.	.	.	.	.	.	.	.	.	.	.	.	.	.	.	.
chr11	126392446	.	A	C	.	PASS	ST3GAL4	intronic	NM_001254757,NM_001348396,NM_001348397,NM_001348398,NM_001348399,NM_001348400,NM_006278	.	.	.	ENST00000444328.6,ENST00000534083.5,ENST00000530591.5,ENST00000227495.10	11q24.2	.	.	.	.	.	.	.	.	.	.	.	.	.	.	.	.	.	.	.	.	.	.	.	.	.	.	.	.	.	.	.	.	.	.	.
chr11	127291988	.	A	C	.	PASS	LOC101929497	ncRNA_intronic	NR_120580	.	.	.	ENST00000608214.1	11q24.2	.	.	Score=10928;Name="917014:L1PB4(LINE)"	.	.	.	.	.	.	.	.	.	.	.	.	.	.	.	.	.	.	.	.	.	.	.	.	.	.	.	.	.	.	.	.
chr11	127291998	.	G	T	.	PASS	LOC101929497	ncRNA_intronic	NR_120580	.	.	.	ENST00000608214.1	11q24.2	.	.	Score=10928;Name="917014:L1PB4(LINE)"	.	.	.	.	.	.	.	.	.	.	.	.	.	.	.	.	.	.	.	.	.	.	.	.	.	.	.	.	.	.	.	.
chr11	127343712	.	C	A	.	PASS	.	intergenic	NR_120580,NR_146647	dist=6679;dist=865054	.	.	.	11q24.2	.	.	Score=2392;Name="917116:L1MD2(LINE)"	.	.	.	.	.	.	.	.	.	.	.	.	.	.	.	.	.	.	.	.	.	.	.	.	.	.	.	.	.	.	.	.
chr11	127566548	.	G	T	.	PASS	.	intergenic	NR_120580,NR_146647	dist=229515;dist=642218	.	.	.	11q24.2	.	.	.	.	.	.	.	.	.	.	.	.	.	.	.	.	.	.	.	.	.	.	.	.	.	.	.	.	.	.	.	.	.	.	.
chr11	127644616	.	A	G	.	PASS	.	intergenic	NR_120580,NR_146647	dist=307583;dist=564150	.	.	.	11q24.2	.	.	.	.	.	.	.	.	.	.	.	.	.	.	.	.	.	.	.	.	.	.	.	.	.	.	.	.	.	.	.	.	.	.	.
chr11	127645681	.	C	G	.	PASS	.	intergenic	NR_120580,NR_146647	dist=308648;dist=563085	.	.	.	11q24.2	.	.	Score=2229;Name="917606:AluSx1(SINE)"	.	.	.	.	.	.	.	.	.	.	.	.	.	.	.	.	.	.	.	.	.	.	.	.	.	.	.	.	.	.	.	.
chr11	127734076	rs941876283	G	T	.	PASS	.	intergenic	NR_120580,NR_146647	dist=397043;dist=474690	.	.	.	11q24.2	.	.	.	rs941876283	.	.	.	.	.	.	.	.	.	.	.	.	.	.	.	.	.	.	.	.	.	.	.	.	.	.	.	.	.	.	.
chr11	128504183	.	C	T	.	PASS	ETS1	intronic	NM_001143820,NM_001162422,NM_001330451,NM_005238	.	.	.	ENST00000526145.6,ENST00000531611.5,ENST00000535549.5,ENST00000392668.8,ENST00000319397.6	11q24.3	.	.	.	.	.	.	.	.	.	.	.	.	.	.	.	.	.	.	.	.	.	.	.	.	.	.	.	.	.	.	.	.	.	.	.
chr11	128716853	.	T	C	.	PASS	FLI1	intronic	NM_001167681,NM_001271010,NM_001271012,NM_002017	.	.	.	ENST00000281428.12,ENST00000527786.6,ENST00000534087.3,ENST00000344954.10	11q24.3	.	.	.	.	.	.	.	.	.	.	.	.	.	.	.	.	.	.	.	.	.	.	.	.	.	.	.	.	.	.	.	.	.	.	.
chr11	129344110	.	G	C	.	PASS	.	intergenic	NR_145484,NM_003658	dist=60946;dist=31876	.	.	.	11q24.3	.	.	Score=27994;Name="920382:L1PA3(LINE)"	.	.	.	.	.	.	.	.	.	.	.	.	.	.	.	.	.	.	.	.	.	.	.	.	.	.	.	.	.	.	.	.
chr11	129919315	.	T	G	.	PASS	PRDM10	intronic	NM_020228,NM_199437,NM_199438,NM_199439	.	.	.	ENST00000304538.10,ENST00000528746.5,ENST00000526082.5,ENST00000423662.6,ENST00000360871.7,ENST00000358825.9	11q24.3	.	.	Score=2140;Name="921411:AluSx(SINE)"	.	.	.	.	.	.	.	.	.	.	.	.	.	.	.	.	.	.	.	.	.	.	.	.	.	.	.	.	.	.	.	.
chr11	130279767	.	C	G	.	PASS	ZBTB44	intronic	NM_001301098,NM_001301099,NM_014155	.	.	.	ENST00000525842.5,ENST00000615689.1,ENST00000357899.8,ENST00000397753.5	11q24.3	.	.	Score=3492;Name="922152:L1MB8(LINE)"	.	.	.	.	.	.	.	.	.	.	.	.	.	.	.	.	.	.	.	.	.	.	.	.	.	.	.	.	.	.	.	.
chr11	130561303	.	T	G	.	PASS	.	intergenic	NM_139055,NR_107019	dist=84658;dist=105432	.	.	.	11q24.3	.	.	.	.	.	.	.	.	.	.	.	.	.	.	.	.	.	.	.	.	.	.	.	.	.	.	.	.	.	.	.	.	.	.	.
chr11	131961814	.	A	C	.	PASS	NTM	intronic	NM_001048209,NM_001144058,NM_001144059,NM_016522	.	.	.	ENST00000374791.7,ENST00000425719.6,ENST00000374784.5,ENST00000374786.5	11q25	.	.	Score=1783;Name="925031:HERVL40-int(LTR)"	.	.	.	.	.	.	.	.	.	.	.	.	.	.	.	.	.	.	.	.	.	.	.	.	.	.	.	.	.	.	.	.
chr11	132022944	.	A	C	.	PASS	NTM	intronic	NM_001048209,NM_001144058,NM_001144059,NM_016522	.	.	.	ENST00000374791.7,ENST00000374786.5,ENST00000374784.5,ENST00000425719.6	11q25	.	.	.	.	.	.	.	.	.	.	.	.	.	.	.	.	.	.	.	.	.	.	.	.	.	.	.	.	.	.	.	.	.	.	.
chr11	132073634	.	C	G	.	PASS	NTM	intronic	NM_001048209,NM_001144058,NM_001144059,NM_016522	.	.	.	ENST00000374784.5,ENST00000425719.6,ENST00000374786.5,ENST00000374791.7	11q25	.	.	.	.	.	.	.	.	.	.	.	.	.	.	.	.	.	.	.	.	.	.	.	.	.	.	.	.	.	.	.	.	.	.	.
chr11	132257269	.	G	T	.	PASS	NTM	intronic	NM_001048209,NM_001144058,NM_001144059,NM_016522	.	.	.	ENST00000427481.6,ENST00000374791.7,ENST00000374786.5,ENST00000374784.5,ENST00000539799.5,ENST00000425719.6	11q25	.	.	.	.	.	.	.	.	.	.	.	.	.	.	.	.	.	.	.	.	.	.	.	.	.	.	.	.	.	.	.	.	.	.	.
chr11	132324268	.	T	C	.	PASS	NTM	intronic	NM_001048209,NM_001144058,NM_016522	.	.	.	ENST00000425719.6,ENST00000539799.5,ENST00000374786.5,ENST00000374791.7,ENST00000427481.6	11q25	.	.	Score=28046;Name="925548:L1PA4(LINE)"	.	.	.	.	.	.	.	.	.	.	.	.	.	.	.	.	.	.	.	.	.	.	.	.	.	.	.	.	.	.	.	.
chr11	132325999	.	A	G	.	PASS	NTM	intronic	NM_001048209,NM_001144058,NM_016522	.	.	.	ENST00000427481.6,ENST00000374791.7,ENST00000374786.5,ENST00000425719.6,ENST00000539799.5	11q25	.	.	Score=28046;Name="925548:L1PA4(LINE)"	.	.	.	.	.	.	.	.	.	.	.	.	.	.	.	.	.	.	.	.	.	.	.	.	.	.	.	.	.	.	.	.
chr11	132379460	.	C	G	.	PASS	.	intergenic	NM_001048209,NM_001319103	dist=42638;dist=35205	.	.	.	11q25	.	.	Score=44377;Name="925609:HERVL-int(LTR)"	.	.	.	.	.	.	.	.	.	.	.	.	.	.	.	.	.	.	.	.	.	.	.	.	.	.	.	.	.	.	.	.
chr11	132572528	.	T	C	.	PASS	OPCML	intronic	NM_001012393,NM_001319103,NM_001319104,NM_001319105,NM_001319106,NM_002545	.	.	.	ENST00000331898.11,ENST00000374778.4,ENST00000612177.4,ENST00000524381.5,ENST00000541867.5	11q25	.	.	Score=13557;Name="925881:L1MB1(LINE)"	.	.	.	.	.	.	.	.	.	.	.	.	.	.	.	.	.	.	.	.	.	.	.	.	.	.	.	.	.	.	.	.
chr11	132628944	.	A	C	.	PASS	OPCML	intronic	NM_001012393,NM_001319103,NM_001319104,NM_001319105,NM_001319106,NM_002545	.	.	.	ENST00000541867.5,ENST00000524381.5,ENST00000612177.4,ENST00000374778.4,ENST00000331898.11	11q25	.	.	Score=2543;Name="925963:THE1C(LTR)"	.	.	.	.	.	.	.	.	.	.	.	.	.	.	.	.	.	.	.	.	.	.	.	.	.	.	.	.	.	.	.	.
chr11	132795068	.	A	C	.	PASS	OPCML	intronic	NM_001012393,NM_001319103,NM_001319104,NM_001319105,NM_001319106,NM_002545	.	.	.	ENST00000374778.4,ENST00000331898.11,ENST00000612177.4,ENST00000541867.5,ENST00000524381.5	11q25	.	.	.	.	.	.	.	.	.	.	.	.	.	.	.	.	.	.	.	.	.	.	.	.	.	.	.	.	.	.	.	.	.	.	.
chr11	134174421	.	C	A	.	PASS	NCAPD3	intronic	NM_015261	.	.	.	ENST00000534548.6	11q25	.	.	.	.	.	.	.	.	.	.	.	.	.	.	.	.	.	.	.	.	.	.	.	.	.	.	.	.	.	.	.	.	.	.	.
chr11	134342159	.	C	G	.	PASS	GLB1L2	intronic	NM_138342	.	.	.	ENST00000535456.6,ENST00000339772.9	11q25	.	.	.	.	.	.	.	.	.	.	.	.	.	.	.	.	.	.	.	.	.	.	.	.	.	.	.	.	.	.	.	.	.	.	.
chr11	134579561	.	T	C	.	PASS	.	intergenic	NR_033852,NR_135050	dist=73900;dist=405791	.	.	.	11q25	.	.	.	.	.	.	.	.	.	.	.	.	.	.	.	.	.	.	.	.	.	.	.	.	.	.	.	.	.	.	.	.	.	.	.
chr11	134936003	rs12365799	T	G	.	PASS	.	intergenic	NR_033852,NR_135050	dist=430342;dist=49349	.	.	.	11q25	.	.	.	rs12365799	.	.	.	.	.	.	.	.	.	.	.	.	.	.	.	.	.	.	.	.	.	.	.	.	.	.	.	.	.	.	.
chr12	253435	rs763991752	C	T	.	PASS	SLC6A13	intronic	NM_001190997,NM_016615	.	.	.	ENST00000343164.8,ENST00000445055.6	12p13.33	.	.	.	rs763991752	.	.	.	.	.	.	.	.	.	.	.	.	.	.	.	.	.	.	.	.	.	.	.	.	.	.	.	.	.	.	.
chr12	311627	rs545859448	G	A	.	PASS	KDM5A	intronic	NM_001042603	.	.	.	ENST00000399788.6,ENST00000382815.8	12p13.33	.	.	Score=451;Name="933956:HAL1ME(LINE)"	rs545859448	.	.	.	.	.	.	.	.	0.0072	.	0.0008	.	0.00159744	.	.	.	.	.	.	.	.	.	.	.	.	.	.	.	.	.	.
chr12	2198728	.	A	C	.	PASS	CACNA1C	intronic	NM_000719,NM_001129827,NM_001129829,NM_001129830,NM_001129831,NM_001129832,NM_001129833,NM_001129834,NM_001129835,NM_001129836,NM_001129837,NM_001129838,NM_001129839,NM_001129840,NM_001129841,NM_001129842,NM_001129843,NM_001129844,NM_001129846,NM_001167623,NM_001167624,NM_001167625,NM_199460	.	.	.	ENST00000406454.7,ENST00000399638.5,ENST00000399641.5,ENST00000399617.5,ENST00000399634.5,ENST00000399591.5,ENST00000399629.5,ENST00000327702.11,ENST00000347598.8,ENST00000402845.7,ENST00000399595.5,ENST00000399601.5,ENST00000399649.5,ENST00000399606.5,ENST00000344100.7,ENST00000335762.9,ENST00000399621.5,ENST00000399603.5,ENST00000399655.5,ENST00000399637.5,ENST00000399644.5,ENST00000399597.5,EN…	12p13.33	.	.	.	.	.	.	.	.	.	.	.	.	.	.	.	.	.	.	.	.	.	.	.	.	.	.	.	.	.	.	.	.	.	.	.
chr12	2229448	.	C	G	.	PASS	CACNA1C	intronic	NM_000719,NM_001129827,NM_001129829,NM_001129830,NM_001129831,NM_001129832,NM_001129833,NM_001129834,NM_001129835,NM_001129836,NM_001129837,NM_001129838,NM_001129839,NM_001129840,NM_001129841,NM_001129842,NM_001129843,NM_001129844,NM_001129846,NM_001167623,NM_001167624,NM_001167625,NM_199460	.	.	.	ENST00000399644.5,ENST00000399597.5,ENST00000480911.5,ENST00000399649.5,ENST00000399601.5,ENST00000399595.5,ENST00000399655.5,ENST00000399603.5,ENST00000399621.5,ENST00000399637.5,ENST00000399606.5,ENST00000335762.9,ENST00000344100.7,ENST00000399629.5,ENST00000399634.5,ENST00000399591.5,ENST00000402845.7,ENST00000327702.11,ENST00000347598.8,ENST00000406454.7,ENST00000399617.5,ENST00000399638.5,EN…	12p13.33	.	.	Score=1052;Name="938010:L2a(LINE)"	.	.	.	.	.	.	.	.	.	.	.	.	.	.	.	.	.	.	.	.	.	.	.	.	.	.	.	.	.	.	.	.
chr12	2314661	.	T	G	.	PASS	CACNA1C	intronic	NM_000719,NM_001129827,NM_001129829,NM_001129830,NM_001129831,NM_001129832,NM_001129833,NM_001129834,NM_001129835,NM_001129836,NM_001129837,NM_001129838,NM_001129839,NM_001129840,NM_001129841,NM_001129842,NM_001129843,NM_001129844,NM_001129846,NM_001167623,NM_001167624,NM_001167625,NM_199460	.	.	.	ENST00000399637.5,ENST00000399621.5,ENST00000399603.5,ENST00000399655.5,ENST00000335762.9,ENST00000344100.7,ENST00000399606.5,ENST00000399649.5,ENST00000399601.5,ENST00000399595.5,ENST00000480911.5,ENST00000399597.5,ENST00000399644.5,ENST00000399617.5,ENST00000399641.5,ENST00000399638.5,ENST00000406454.7,ENST00000402845.7,ENST00000347598.8,ENST00000327702.11,ENST00000399629.5,ENST00000399591.5,EN…	12p13.33	.	.	Score=1287;Name="938159:L1ME3A(LINE)"	.	.	.	.	.	.	.	.	.	.	.	.	.	.	.	.	.	.	.	.	.	.	.	.	.	.	.	.	.	.	.	.
chr12	2697041	.	A	C	.	PASS	CACNA1C	UTR3	NM_000719,NM_001129827,NM_001129829,NM_001129830,NM_001129831,NM_001129832,NM_001129833,NM_001129834,NM_001129835,NM_001129836,NM_001129837,NM_001129838,NM_001129839,NM_001129840,NM_001129841,NM_001129842,NM_001129843,NM_001129844,NM_001129846,NM_001167623,NM_001167624,NM_001167625,NM_199460	NM_000719:c.*5842A>C;NM_001129827:c.*5842A>C;NM_001129829:c.*5842A>C;NM_001129830:c.*5842A>C;NM_001129831:c.*5842A>C;NM_001129832:c.*5842A>C;NM_001129833:c.*5842A>C;NM_001129834:c.*5842A>C;NM_001129835:c.*5842A>C;NM_001129836:c.*5842A>C;NM_001129837:c.*5842A>C;NM_001129838:c.*5842A>C;NM_001129839:c.*5842A>C;NM_001129840:c.*5842A>C;NM_001129841:c.*5842A>C;NM_001129842:c.*5842A>C;NM_001129843:c.*58…	.	.	ENST00000613940.4,ENST00000615303.4,ENST00000399655.5,ENST00000620878.4,ENST00000621625.4,ENST00000615400.4	12p13.33	.	.	.	.	.	.	.	.	.	.	.	.	.	.	.	.	.	.	.	.	.	.	.	.	.	.	.	.	.	.	.	.	.	.	.
chr12	3396692	.	T	C	.	PASS	PRMT8	intronic	NM_001256536	.	.	.	ENST00000452611.6	12p13.32	.	.	Score=28250;Name="940207:L1PA3(LINE)"	.	.	.	.	.	.	.	.	.	.	.	.	.	.	.	.	.	.	.	.	.	.	.	.	.	.	.	.	.	.	.	.
chr12	4443662	.	C	G	.	PASS	FGF6	intronic	NM_020996	.	.	.	ENST00000228837.2	12p13.32	.	.	.	.	.	.	.	.	.	.	.	.	.	.	.	.	.	.	.	.	.	.	.	.	.	.	.	.	.	.	.	.	.	.	.
chr12	5082511	rs113015330	A	T	.	PASS	.	intergenic	NM_002234,NR_120476	dist=35723;dist=151485	.	.	.	12p13.32	.	.	Score=43;Name="943451:(AC)n(Simple_repeat)"	rs113015330	.	.	.	.	.	.	.	0.001	0.001	0.001	0.003	.	0.00139776	.	.	.	.	.	.	.	.	.	.	.	.	.	.	.	.	.	.
chr12	5224877	.	T	C	.	PASS	.	intergenic	NM_002234,NR_120476	dist=178089;dist=9119	.	.	.	12p13.32	.	.	.	.	.	.	.	.	.	.	.	.	.	.	.	.	.	.	.	.	.	.	.	.	.	.	.	.	.	.	.	.	.	.	.
chr12	5929989	.	G	C	.	PASS	ANO2	intronic	NM_001278596,NM_001278597	.	.	.	ENST00000327087.12,ENST00000546188.5,ENST00000356134.9	12p13.31	.	.	.	.	.	.	.	.	.	.	.	.	.	.	.	.	.	.	.	.	.	.	.	.	.	.	.	.	.	.	.	.	.	.	.
chr12	6294279	.	A	C	.	PASS	.	intergenic	NM_001330312,NM_018173	dist=56008;dist=16157	.	.	.	12p13.31	.	.	Score=59;Name="945659:(GAAG)n(Simple_repeat)"	.	.	.	.	.	.	.	.	.	.	.	.	.	.	.	.	.	.	.	.	.	.	.	.	.	.	.	.	.	.	.	.
chr12	6444440	.	C	A	.	PASS	CD27-AS1	ncRNA_intronic	NR_015382	.	.	.	ENST00000545339.5,ENST00000399492.6	12p13.31	.	.	Score=792;Name="946056:MER46C(DNA)"	.	.	.	.	.	.	.	.	.	.	.	.	.	.	.	.	.	.	.	.	.	.	.	.	.	.	.	.	.	.	.	.
chr12	6925141	rs782720259	T	A	.	PASS	ATN1	intronic	NM_001007026	.	.	.	ENST00000356654.8	12p13.31	.	.	Score=38;Name="947115:(TG)n(Simple_repeat)"	rs782720259	.	.	.	.	.	.	.	0.0149	0.0102	0.0239	0.1324	0.0274	0.0485224	.	.	.	.	.	.	.	.	.	.	.	.	.	.	.	.	.	.
chr12	7360188	.	G	C	.	PASS	CD163L1	intronic	NM_001297650,NM_174941	.	.	.	ENST00000416109.2,ENST00000313599.7	12p13.31	.	.	Score=2244;Name="947902:AluSq2(SINE)"	.	.	.	.	.	.	.	.	.	.	.	.	.	.	.	.	.	.	.	.	.	.	.	.	.	.	.	.	.	.	.	.
chr12	7408093	rs200750971	A	C	.	PASS	CD163L1	intronic	NM_001297650,NM_174941	.	.	.	ENST00000416109.2,ENST00000313599.7	12p13.31	.	.	Score=22;Name="947969:(TA)n(Simple_repeat)"	rs200750971	.	.	.	.	.	.	.	.	.	.	.	.	.	.	.	.	.	.	.	.	.	.	.	.	.	.	.	.	.	.	.
chr12	7638869	.	A	C	.	PASS	.	intergenic	NM_004244,NM_001644	dist=135051;dist=10531	.	.	.	12p13.31	.	.	Score=5775;Name="948291:HUERS-P3-int(LTR)"	.	.	.	.	.	.	.	.	.	.	.	.	.	.	.	.	.	.	.	.	.	.	.	.	.	.	.	.	.	.	.	.
chr12	7942467	.	G	C	.	PASS	.	intergenic	NM_006931,NM_018416	dist=6171;dist=90296	.	.	.	12p13.31	.	.	Score=2177;Name="949261:AluSx(SINE)"	.	.	.	.	.	.	.	.	.	.	.	.	.	.	.	.	.	.	.	.	.	.	.	.	.	.	.	.	.	.	.	.
chr12	8381735	.	C	A	.	PASS	LINC00937	ncRNA_intronic	NR_024420	.	.	.	ENST00000544461.1	12p13.31	.	Score=0.956972;Name=chr11:71636599	.	.	.	.	.	.	.	.	.	.	.	.	.	.	.	.	.	.	.	.	.	.	.	.	.	.	.	.	.	.	.	.	.
chr12	8381961	rs371244031	G	C	.	PASS	LINC00937	ncRNA_intronic	NR_024420	.	.	.	ENST00000544461.1	12p13.31	.	Score=0.956972;Name=chr11:71636599	.	rs371244031	.	.	.	.	.	.	.	.	.	.	.	.	.	.	.	.	.	.	.	.	.	.	.	.	.	.	.	.	.	.	.
chr12	8391244	rs9706192	C	T	.	PASS	.	upstream	NR_024420	.	.	.	ENST00000538304.1,ENST00000544461.1	12p13.31	.	Score=0.963759;Name=chr12:8393269	Score=461;Name="950226:L2b(LINE)"	rs9706192	.	.	.	.	.	.	.	.	.	.	.	.	.	.	.	.	.	.	.	.	.	.	.	.	.	.	.	.	.	.	.
chr12	9435896	rs146135367	G	C	.	PASS	DDX12P	ncRNA_intronic	NR_033399	.	.	.	.	12p13.31	.	Score=0.985117;Name=chr12:9283607	Score=247;Name="952234:L2c(LINE)"	rs146135367	.	.	.	.	.	.	.	.	.	.	.	.	.	.	.	.	.	.	.	.	.	.	.	.	.	.	.	.	.	.	.
chr12	9952304	.	G	C	.	PASS	CLEC12A	ncRNA_intronic	NR_135047	.	.	.	ENST00000420905.1,ENST00000355690.8	12p13.31	.	.	Score=5088;Name="953103:SVA_F(Retroposon)"	.	.	.	.	.	.	.	.	.	.	.	.	.	.	.	.	.	.	.	.	.	.	.	.	.	.	.	.	.	.	.	.
chr12	10673835	.	T	G	.	PASS	STYK1	intronic	NM_018423	.	.	.	ENST00000075503.7	12p13.2	.	.	.	.	.	.	.	.	.	.	.	.	.	.	.	.	.	.	.	.	.	.	.	.	.	.	.	.	.	.	.	.	.	.	.
chr12	10729204	.	T	G	.	PASS	.	intergenic	NM_003651,NR_120463	dist=5850;dist=21030	.	.	.	12p13.2	.	.	Score=13;Name="954425:(TTTCT)n(Simple_repeat)"	.	.	.	.	.	.	.	.	.	.	.	.	.	.	.	.	.	.	.	.	.	.	.	.	.	.	.	.	.	.	.	.
chr12	12062223	.	C	G	.	PASS	.	intergenic	NM_001987,NM_138723	dist=166832;dist=8721	.	.	ENST00000589718.5,ENST00000586576.5	12p13.2	.	.	Score=3512;Name="956664:HERVH-int(LTR)"	.	.	.	.	.	.	.	.	.	.	.	.	.	.	.	.	.	.	.	.	.	.	.	.	.	.	.	.	.	.	.	.
chr12	12596273	rs921049951	C	T	.	PASS	.	intergenic	NM_030640,NM_001310	dist=33759;dist=15560	.	.	.	12p13.2	.	.	Score=469;Name="957837:LTR10F(LTR)"	rs921049951	.	.	.	.	.	.	.	.	.	.	.	.	.	.	.	.	.	.	.	.	.	.	.	.	.	.	.	.	.	.	.
chr12	12651133	.	A	C	.	PASS	.	intergenic	NM_001310,NM_006143	dist=6025;dist=9928	.	.	.	12p13.1	.	.	Score=2390;Name="957950:AluSx1(SINE)"	.	.	.	.	.	.	.	.	.	.	.	.	.	.	.	.	.	.	.	.	.	.	.	.	.	.	.	.	.	.	.	.
chr12	13541483	.	A	C	.	PASS	.	intergenic	NR_036555,NM_000834	dist=164738;dist=19993	.	.	ENST00000621825.1,ENST00000543347.1,ENST00000609686.3	12p13.1	.	.	.	.	.	.	.	.	.	.	.	.	.	.	.	.	.	.	.	.	.	.	.	.	.	.	.	.	.	.	.	.	.	.	.
chr12	14707788	.	T	C	.	PASS	.	intergenic	NM_004963,NM_175054	dist=11203;dist=62932	.	.	ENST00000501178.2	12p12.3	.	.	Score=20819;Name="961901:HERVH-int(LTR)"	.	.	.	.	.	.	.	.	.	.	.	.	.	.	.	.	.	.	.	.	.	.	.	.	.	.	.	.	.	.	.	.
chr12	14707877	.	A	C	.	PASS	.	intergenic	NM_004963,NM_175054	dist=11292;dist=62843	.	.	ENST00000501178.2	12p12.3	.	.	Score=20819;Name="961901:HERVH-int(LTR)"	.	.	.	.	.	.	.	.	.	.	.	.	.	.	.	.	.	.	.	.	.	.	.	.	.	.	.	.	.	.	.	.
chr12	16029410	.	G	C	.	PASS	DERA	intronic	NM_001300779,NM_015954	.	.	.	ENST00000532964.5,ENST00000526530.1,ENST00000428559.6	12p12.3	.	.	Score=2435;Name="964121:AluYc(SINE)"	.	.	.	.	.	.	.	.	.	.	.	.	.	.	.	.	.	.	.	.	.	.	.	.	.	.	.	.	.	.	.	.
chr12	16153861	.	G	T	.	PASS	.	intergenic	NM_015954,NM_001170798	dist=116480;dist=34624	.	.	.	12p12.3	.	.	.	.	.	.	.	.	.	.	.	.	.	.	.	.	.	.	.	.	.	.	.	.	.	.	.	.	.	.	.	.	.	.	.
chr12	16337705	.	G	C	.	PASS	.	intergenic	NM_001170798,NM_145792	dist=60020;dist=9437	.	.	.	12p12.3	.	.	.	.	.	.	.	.	.	.	.	.	.	.	.	.	.	.	.	.	.	.	.	.	.	.	.	.	.	.	.	.	.	.	.
chr12	16967077	.	T	A	.	PASS	.	intergenic	NM_001243609,NR_036619	dist=358863;dist=21670	.	.	.	12p12.3	.	.	Score=2441;Name="965662:AluY(SINE)"	.	.	.	.	.	.	.	.	.	.	.	.	.	.	.	.	.	.	.	.	.	.	.	.	.	.	.	.	.	.	.	.
chr12	17371780	rs1019809673	T	A	.	PASS	.	intergenic	NR_036619,NR_146522	dist=381152;dist=210043	.	.	.	12p12.3	.	.	Score=67;Name="966302:(TCCT)n(Simple_repeat)"	rs1019809673	.	.	.	.	.	.	.	.	.	.	.	.	.	.	.	.	.	.	.	.	.	.	.	.	.	.	.	.	.	.	.
chr12	17378990	.	G	A	.	PASS	.	intergenic	NR_036619,NR_146522	dist=388362;dist=202833	.	.	.	12p12.3	.	.	.	.	.	.	.	.	.	.	.	.	.	.	.	.	.	.	.	.	.	.	.	.	.	.	.	.	.	.	.	.	.	.	.
chr12	17598222	.	G	C	.	PASS	.	intergenic	NR_146522,NR_039770	dist=9144;dist=75077	.	.	ENST00000539105.1	12p12.3	.	.	Score=1393;Name="966633:AluSq(SINE)"	.	.	.	.	.	.	.	.	.	.	.	.	.	.	.	.	.	.	.	.	.	.	.	.	.	.	.	.	.	.	.	.
chr12	17915674	.	T	A	.	PASS	.	intergenic	NR_039770,NM_001286201	dist=242280;dist=165195	.	.	.	12p12.3	.	.	.	.	.	.	.	.	.	.	.	.	.	.	.	.	.	.	.	.	.	.	.	.	.	.	.	.	.	.	.	.	.	.	.
chr12	18129650	.	C	G	.	PASS	.	intergenic	NM_001286201,NM_004570	dist=39457;dist=131890	.	.	.	12p12.3	.	.	.	.	.	.	.	.	.	.	.	.	.	.	.	.	.	.	.	.	.	.	.	.	.	.	.	.	.	.	.	.	.	.	.
chr12	18136373	.	G	C	.	PASS	.	intergenic	NM_001286201,NM_004570	dist=46180;dist=125167	.	.	.	12p12.3	.	.	.	.	.	.	.	.	.	.	.	.	.	.	.	.	.	.	.	.	.	.	.	.	.	.	.	.	.	.	.	.	.	.	.
chr12	20094275	.	G	A	.	PASS	LOC100506393	ncRNA_intronic	NR_040098	.	.	.	ENST00000536666.1	12p12.2	.	.	Score=823;Name="970925:L1PB1(LINE)"	.	.	.	.	.	.	.	.	.	.	.	.	.	.	.	.	.	.	.	.	.	.	.	.	.	.	.	.	.	.	.	.
chr12	21858061	.	T	A	.	PASS	ABCC9	intronic	NM_005691,NM_020297	.	.	.	ENST00000261200.8,ENST00000539874.1,ENST00000261201.8	12p12.1	.	.	Score=337;Name="973558:L3(LINE)"	.	.	.	.	.	.	.	.	.	.	.	.	.	.	.	.	.	.	.	.	.	.	.	.	.	.	.	.	.	.	.	.
chr12	24234707	rs944206322	T	C	.	PASS	LOC101928471	ncRNA_intronic	NR_120472	.	.	.	ENST00000539583.1,ENST00000540811.5	12p12.1	.	.	.	rs944206322	.	.	.	.	.	.	.	.	.	.	.	.	.	.	.	.	.	.	.	.	.	.	.	.	.	.	.	.	.	.	.
chr12	24383293	.	C	G	.	PASS	SOX5	intronic	NM_001261414,NM_152989	.	.	.	ENST00000538905.1,ENST00000540811.5,ENST00000456299.2	12p12.1	.	.	.	.	.	.	.	.	.	.	.	.	.	.	.	.	.	.	.	.	.	.	.	.	.	.	.	.	.	.	.	.	.	.	.
chr12	25411259	rs369593520	C	A	.	PASS	.	intergenic	NM_004985,NM_001256266	dist=160328;dist=64823	.	.	.	12p12.1	.	.	Score=37;Name="979756:(A)n(Simple_repeat)"	rs369593520	.	.	.	.	.	.	.	.	.	.	.	.	.	.	.	.	.	.	.	.	.	.	.	.	.	.	.	.	.	.	.
chr12	26203057	.	A	C	.	PASS	SSPN	intronic	NM_001135823,NM_005086	.	.	.	ENST00000535504.1,ENST00000242729.6,ENST00000540266.5,ENST00000422622.3	12p12.1	.	.	Score=1912;Name="981188:THE1D(LTR)"	.	.	.	.	.	.	.	.	.	.	.	.	.	.	.	.	.	.	.	.	.	.	.	.	.	.	.	.	.	.	.	.
chr12	26323500	.	G	C	.	PASS	.	intergenic	NM_001135823,NM_002223	dist=88725;dist=11837	.	.	ENST00000535324.1,ENST00000540392.1	12p11.23	.	.	.	.	.	.	.	.	.	.	.	.	.	.	.	.	.	.	.	.	.	.	.	.	.	.	.	.	.	.	.	.	.	.	.
chr12	26373410	.	G	T	.	PASS	ITPR2	intronic	NM_002223	.	.	.	ENST00000381340.7,ENST00000535324.1	12p11.23	.	.	.	.	.	.	.	.	.	.	.	.	.	.	.	.	.	.	.	.	.	.	.	.	.	.	.	.	.	.	.	.	.	.	.
chr12	26566516	.	A	C	.	PASS	ITPR2	intronic	NM_002223	.	.	.	ENST00000381340.7	12p11.23	.	.	Score=393;Name="981765:GA-rich(Low_complexity)"	.	.	.	.	.	.	.	.	.	.	.	.	.	.	.	.	.	.	.	.	.	.	.	.	.	.	.	.	.	.	.	.
chr12	28043481	.	A	G	.	PASS	.	intergenic	NM_198965,NM_018318	dist=71498;dist=146946	.	.	.	12p11.22	.	.	Score=69;Name="984539:(AC)n(Simple_repeat)"	.	.	.	.	.	.	.	.	.	.	.	.	.	.	.	.	.	.	.	.	.	.	.	.	.	.	.	.	.	.	.	.
chr12	30403713	.	G	C	.	PASS	.	intergenic	NM_175861,NM_006390	dist=618954;dist=225268	.	.	.	12p11.22	.	.	Score=758;Name="988339:L1PA16(LINE)"	.	.	.	.	.	.	.	.	.	.	.	.	.	.	.	.	.	.	.	.	.	.	.	.	.	.	.	.	.	.	.	.
chr12	30405614	.	T	C	.	PASS	.	intergenic	NM_175861,NM_006390	dist=620855;dist=223367	.	.	.	12p11.22	.	.	Score=12125;Name="988342:L1PA16(LINE)"	.	.	.	.	.	.	.	.	.	.	.	.	.	.	.	.	.	.	.	.	.	.	.	.	.	.	.	.	.	.	.	.
chr12	31058187	rs74087903	C	T	.	PASS	DDX11-AS1	ncRNA_intronic	NR_038927	.	.	.	ENST00000500527.1	12p11.21	.	Score=0.978916;Name=chr12:9414548	.	rs74087903	.	.	.	.	.	.	.	0.1835	0.2771	0.2495	0.2368	0.2363	0.236422	.	.	.	.	.	.	.	.	.	.	.	.	.	.	.	.	.	.
chr12	31143635	.	G	T	.	PASS	.	intergenic	NM_001257145,NM_001135811	dist=38844;dist=136951	.	.	ENST00000398963.8,ENST00000632817.1	12p11.21	.	Score=0.978778;Name=chr12:9510411	.	.	.	.	.	.	.	.	.	.	.	.	.	.	.	.	.	.	.	.	.	.	.	.	.	.	.	.	.	.	.	.	.
chr12	31322246	.	A	G	.	PASS	FAM60A	intronic	NM_001135811,NM_001135812,NM_021238	.	.	.	ENST00000337682.8,ENST00000542983.1,ENST00000539409.5,ENST00000454658.6	12p11.21	.	.	.	.	.	.	.	.	.	.	.	.	.	.	.	.	.	.	.	.	.	.	.	.	.	.	.	.	.	.	.	.	.	.	.
chr12	33659844	.	C	G	.	PASS	.	intergenic	NM_198992,NM_032834	dist=220025;dist=362437	.	.	.	12p11.1	.	.	Score=458;Name="995123:MER34B-int(LTR)"	.	.	.	.	.	.	.	.	.	.	.	.	.	.	.	.	.	.	.	.	.	.	.	.	.	.	.	.	.	.	.	.
chr12	33840710	rs11052956	C	G	.	PASS	.	intergenic	NM_198992,NM_032834	dist=400891;dist=181571	.	.	.	12p11.1	.	.	Score=34;Name="995412:(TC)n(Simple_repeat)"	rs11052956	.	.	.	.	.	.	.	.	.	.	.	.	.	.	.	.	.	.	.	.	.	.	.	.	.	.	.	.	.	.	.
chr12	33881462	.	A	C	.	PASS	.	intergenic	NM_198992,NM_032834	dist=441643;dist=140819	.	.	.	12p11.1	.	.	Score=15542;Name="995466:L1PA10(LINE)"	.	.	.	.	.	.	.	.	.	.	.	.	.	.	.	.	.	.	.	.	.	.	.	.	.	.	.	.	.	.	.	.
chr12	34204087	.	C	T	.	PASS	.	intergenic	NM_032834,NONE	dist=175786;dist=NONE	.	.	ENST00000545923.2	12p11.1	.	Score=0.904857;Name=chr12:38160963	.	.	.	.	.	.	.	.	.	.	.	.	.	.	.	.	.	.	.	.	.	.	.	.	.	.	.	.	.	.	.	.	.
chr12	34804752	.	T	G	.	PASS	.	intergenic	NM_032834,NONE	dist=776451;dist=NONE	.	.	.	12p11.1	.	.	Score=1420;Name="996248:ALR/Alpha(Satellite)"	.	.	.	.	.	.	.	.	.	.	.	.	.	.	.	.	.	.	.	.	.	.	.	.	.	.	.	.	.	.	.	.
chr12	34881686	.	T	G	.	PASS	.	intergenic	NM_032834,NONE	dist=853385;dist=NONE	.	.	.	12p11.1	.	.	Score=1421;Name="996256:ALR/Alpha(Satellite)"	.	.	.	.	.	.	.	.	.	.	.	.	.	.	.	.	.	.	.	.	.	.	.	.	.	.	.	.	.	.	.	.
chr12	35013222	.	A	C	.	PASS	.	intergenic	NM_032834,NONE	dist=984921;dist=NONE	.	.	.	12p11.1	.	.	Score=1358;Name="996257:ALR/Alpha(Satellite)"	.	.	.	.	.	.	.	.	.	.	.	.	.	.	.	.	.	.	.	.	.	.	.	.	.	.	.	.	.	.	.	.
chr12	35190703	.	A	T	.	PASS	.	intergenic	NM_032834,NONE	dist=1162402;dist=NONE	.	.	.	12p11.1	.	.	Score=1358;Name="996257:ALR/Alpha(Satellite)"	.	.	.	.	.	.	.	.	.	.	.	.	.	.	.	.	.	.	.	.	.	.	.	.	.	.	.	.	.	.	.	.
chr12	35235810	.	G	C	.	PASS	.	intergenic	NM_032834,NONE	dist=1207509;dist=NONE	.	.	.	12p11.1	.	.	Score=1358;Name="996257:ALR/Alpha(Satellite)"	.	.	.	.	.	.	.	.	.	.	.	.	.	.	.	.	.	.	.	.	.	.	.	.	.	.	.	.	.	.	.	.
chr12	35331148	.	C	A	.	PASS	.	intergenic	NM_032834,NONE	dist=1302847;dist=NONE	.	.	.	12p11.1	.	.	Score=1358;Name="996257:ALR/Alpha(Satellite)"	.	.	.	.	.	.	.	.	.	.	.	.	.	.	.	.	.	.	.	.	.	.	.	.	.	.	.	.	.	.	.	.
chr12	35333790	.	T	C	.	PASS	.	intergenic	NM_032834,NONE	dist=1305489;dist=NONE	.	.	.	12p11.1	.	.	Score=1358;Name="996257:ALR/Alpha(Satellite)"	.	.	.	.	.	.	.	.	.	.	.	.	.	.	.	.	.	.	.	.	.	.	.	.	.	.	.	.	.	.	.	.
chr12	35482124	.	C	A	.	PASS	.	intergenic	NM_032834,NONE	dist=1453823;dist=NONE	.	.	.	12p11.1	.	.	Score=1358;Name="996257:ALR/Alpha(Satellite)"	.	.	.	.	.	.	.	.	.	.	.	.	.	.	.	.	.	.	.	.	.	.	.	.	.	.	.	.	.	.	.	.
chr12	35796710	.	A	C	.	PASS	.	intergenic	NM_032834,NONE	dist=1768409;dist=NONE	.	.	.	12q11	.	.	Score=1358;Name="996258:ALR/Alpha(Satellite)"	.	.	.	.	.	.	.	.	.	.	.	.	.	.	.	.	.	.	.	.	.	.	.	.	.	.	.	.	.	.	.	.
chr12	35796960	.	G	T	.	PASS	.	intergenic	NM_032834,NONE	dist=1768659;dist=NONE	.	.	.	12q11	.	.	Score=1358;Name="996258:ALR/Alpha(Satellite)"	.	.	.	.	.	.	.	.	.	.	.	.	.	.	.	.	.	.	.	.	.	.	.	.	.	.	.	.	.	.	.	.
chr12	35874686	.	T	G	.	PASS	.	intergenic	NM_032834,NONE	dist=1846385;dist=NONE	.	.	.	12q11	.	.	Score=1358;Name="996258:ALR/Alpha(Satellite)"	.	.	.	.	.	.	.	.	.	.	.	.	.	.	.	.	.	.	.	.	.	.	.	.	.	.	.	.	.	.	.	.
chr12	35982412	.	G	A	.	PASS	.	intergenic	NM_032834,NONE	dist=1954111;dist=NONE	.	.	.	12q11	.	.	Score=1358;Name="996258:ALR/Alpha(Satellite)"	.	.	.	.	.	.	.	.	.	.	.	.	.	.	.	.	.	.	.	.	.	.	.	.	.	.	.	.	.	.	.	.
chr12	36054389	.	A	G	.	PASS	.	intergenic	NM_032834,NONE	dist=2026088;dist=NONE	.	.	.	12q11	.	.	Score=1435;Name="996259:ALR/Alpha(Satellite)"	.	.	.	.	.	.	.	.	.	.	.	.	.	.	.	.	.	.	.	.	.	.	.	.	.	.	.	.	.	.	.	.
chr12	36067636	.	A	G	.	PASS	.	intergenic	NM_032834,NONE	dist=2039335;dist=NONE	.	.	.	12q11	.	.	Score=1435;Name="996259:ALR/Alpha(Satellite)"	.	.	.	.	.	.	.	.	.	.	.	.	.	.	.	.	.	.	.	.	.	.	.	.	.	.	.	.	.	.	.	.
chr12	36170460	.	G	C	.	PASS	.	intergenic	NONE,NONE	dist=NONE;dist=NONE	.	.	.	12q11	.	.	Score=1435;Name="996259:ALR/Alpha(Satellite)"	.	.	.	.	.	.	.	.	.	.	.	.	.	.	.	.	.	.	.	.	.	.	.	.	.	.	.	.	.	.	.	.
chr12	36214083	.	T	C	.	PASS	.	intergenic	NONE,NONE	dist=NONE;dist=NONE	.	.	.	12q11	.	.	Score=1435;Name="996259:ALR/Alpha(Satellite)"	.	.	.	.	.	.	.	.	.	.	.	.	.	.	.	.	.	.	.	.	.	.	.	.	.	.	.	.	.	.	.	.
chr12	36386004	.	A	G	.	PASS	.	intergenic	NONE,NM_001308340	dist=NONE;dist=1930751	.	.	.	12q11	.	.	Score=1435;Name="996259:ALR/Alpha(Satellite)"	.	.	.	.	.	.	.	.	.	.	.	.	.	.	.	.	.	.	.	.	.	.	.	.	.	.	.	.	.	.	.	.
chr12	36437467	.	T	G	.	PASS	.	intergenic	NONE,NM_001308340	dist=NONE;dist=1879288	.	.	.	12q11	.	.	Score=1435;Name="996259:ALR/Alpha(Satellite)"	.	.	.	.	.	.	.	.	.	.	.	.	.	.	.	.	.	.	.	.	.	.	.	.	.	.	.	.	.	.	.	.
chr12	36461046	.	G	A	.	PASS	.	intergenic	NONE,NM_001308340	dist=NONE;dist=1855709	.	.	.	12q11	.	.	Score=1435;Name="996259:ALR/Alpha(Satellite)"	.	.	.	.	.	.	.	.	.	.	.	.	.	.	.	.	.	.	.	.	.	.	.	.	.	.	.	.	.	.	.	.
chr12	36493291	.	A	T	.	PASS	.	intergenic	NONE,NM_001308340	dist=NONE;dist=1823464	.	.	.	12q11	.	.	Score=1435;Name="996259:ALR/Alpha(Satellite)"	.	.	.	.	.	.	.	.	.	.	.	.	.	.	.	.	.	.	.	.	.	.	.	.	.	.	.	.	.	.	.	.
chr12	36635739	.	A	C	.	PASS	.	intergenic	NONE,NM_001308340	dist=NONE;dist=1681016	.	.	.	12q11	.	.	Score=1358;Name="996260:ALR/Alpha(Satellite)"	.	.	.	.	.	.	.	.	.	.	.	.	.	.	.	.	.	.	.	.	.	.	.	.	.	.	.	.	.	.	.	.
chr12	36686153	.	A	G	.	PASS	.	intergenic	NONE,NM_001308340	dist=NONE;dist=1630602	.	.	.	12q11	.	.	Score=1380;Name="996262:ALR/Alpha(Satellite)"	.	.	.	.	.	.	.	.	.	.	.	.	.	.	.	.	.	.	.	.	.	.	.	.	.	.	.	.	.	.	.	.
chr12	36780767	.	G	T	.	PASS	.	intergenic	NONE,NM_001308340	dist=NONE;dist=1535988	.	.	.	12q11	.	.	Score=1316;Name="996265:ALR/Alpha(Satellite)"	.	.	.	.	.	.	.	.	.	.	.	.	.	.	.	.	.	.	.	.	.	.	.	.	.	.	.	.	.	.	.	.
chr12	36800137	.	T	C	.	PASS	.	intergenic	NONE,NM_001308340	dist=NONE;dist=1516618	.	.	.	12q11	.	.	Score=1342;Name="996267:ALR/Alpha(Satellite)"	.	.	.	.	.	.	.	.	.	.	.	.	.	.	.	.	.	.	.	.	.	.	.	.	.	.	.	.	.	.	.	.
chr12	36898109	.	T	A	.	PASS	.	intergenic	NONE,NM_001308340	dist=NONE;dist=1418646	.	.	.	12q11	.	.	Score=1342;Name="996267:ALR/Alpha(Satellite)"	.	.	.	.	.	.	.	.	.	.	.	.	.	.	.	.	.	.	.	.	.	.	.	.	.	.	.	.	.	.	.	.
chr12	36941237	.	T	A	.	PASS	.	intergenic	NONE,NM_001308340	dist=NONE;dist=1375518	.	.	.	12q11	.	.	Score=1342;Name="996267:ALR/Alpha(Satellite)"	.	.	.	.	.	.	.	.	.	.	.	.	.	.	.	.	.	.	.	.	.	.	.	.	.	.	.	.	.	.	.	.
chr12	37043784	.	T	A	.	PASS	.	intergenic	NONE,NM_001308340	dist=NONE;dist=1272971	.	.	.	12q11	.	.	Score=1358;Name="996271:ALR/Alpha(Satellite)"	.	.	.	.	.	.	.	.	.	.	.	.	.	.	.	.	.	.	.	.	.	.	.	.	.	.	.	.	.	.	.	.
chr12	37176414	.	A	T	.	PASS	.	intergenic	NONE,NM_001308340	dist=NONE;dist=1140341	.	.	.	12q11	.	.	Score=1358;Name="996271:ALR/Alpha(Satellite)"	.	.	.	.	.	.	.	.	.	.	.	.	.	.	.	.	.	.	.	.	.	.	.	.	.	.	.	.	.	.	.	.
chr12	37236238	.	A	T	.	PASS	.	intergenic	NONE,NM_001308340	dist=NONE;dist=1080517	.	.	.	12q11	.	.	Score=1396;Name="996272:ALR/Alpha(Satellite)"	.	.	.	.	.	.	.	.	.	.	.	.	.	.	.	.	.	.	.	.	.	.	.	.	.	.	.	.	.	.	.	.
chr12	37289305	.	A	T	.	PASS	.	intergenic	NONE,NM_001308340	dist=NONE;dist=1027450	.	.	.	12q11	.	.	Score=1313;Name="996277:ALR/Alpha(Satellite)"	.	.	.	.	.	.	.	.	.	.	.	.	.	.	.	.	.	.	.	.	.	.	.	.	.	.	.	.	.	.	.	.
chr12	37448794	.	C	T	.	PASS	.	intergenic	NONE,NM_001308340	dist=NONE;dist=867961	.	.	.	12q11	.	Score=0.957616;Name=chr7:57649697	Score=311;Name="996354:L1M5(LINE)"	.	.	.	.	.	.	.	.	.	.	.	.	.	.	.	.	.	.	.	.	.	.	.	.	.	.	.	.	.	.	.	.
chr12	38072442	.	G	A	.	PASS	.	intergenic	NONE,NM_001308340	dist=NONE;dist=244313	.	.	.	12q12	.	Score=0.916933;Name=chr12:34246691	Score=13783;Name="996808:L1PA2(LINE)"	.	.	.	.	.	.	.	.	.	.	.	.	.	.	.	.	.	.	.	.	.	.	.	.	.	.	.	.	.	.	.	.
chr12	38204951	.	A	T	.	PASS	.	intergenic	NONE,NM_001308340	dist=NONE;dist=111804	.	.	.	12q12	.	Score=0.925715;Name=chr12:34162542	.	.	.	.	.	.	.	.	.	.	.	.	.	.	.	.	.	.	.	.	.	.	.	.	.	.	.	.	.	.	.	.	.
chr12	38749939	.	G	A	.	PASS	CPNE8	intronic	NM_153634	.	.	.	ENST00000331366.9,ENST00000360449.3	12q12	.	.	Score=10671;Name="997879:THE1B-int(LTR)"	.	.	.	.	.	.	.	.	.	.	.	.	.	.	.	.	.	.	.	.	.	.	.	.	.	.	.	.	.	.	.	.
chr12	38968329	.	T	G	.	PASS	.	intergenic	NM_153634,NM_001173464	dist=62711;dist=324899	.	.	.	12q12	.	.	Score=26428;Name="998207:L1PA3(LINE)"	.	.	.	.	.	.	.	.	.	.	.	.	.	.	.	.	.	.	.	.	.	.	.	.	.	.	.	.	.	.	.	.
chr12	39138536	.	G	C	.	PASS	.	intergenic	NM_153634,NM_001173464	dist=232918;dist=154692	.	.	.	12q12	.	.	Score=7600;Name="998491:L1M4b(LINE)"	.	.	.	.	.	.	.	.	.	.	.	.	.	.	.	.	.	.	.	.	.	.	.	.	.	.	.	.	.	.	.	.
chr12	39524608	.	T	A	.	PASS	.	intergenic	NM_001173464,NM_005164	dist=81218;dist=26612	.	.	.	12q12	.	.	.	.	.	.	.	.	.	.	.	.	.	.	.	.	.	.	.	.	.	.	.	.	.	.	.	.	.	.	.	.	.	.	.
chr12	39738113	.	C	G	.	PASS	.	intergenic	NM_001031748,NM_052885	dist=16197;dist=16908	.	.	.	12q12	.	.	.	.	.	.	.	.	.	.	.	.	.	.	.	.	.	.	.	.	.	.	.	.	.	.	.	.	.	.	.	.	.	.	.
chr12	40392495	.	T	A	.	PASS	.	upstream	NM_173600	.	.	.	.	12q12	.	.	.	.	.	.	.	.	.	.	.	.	.	.	.	.	.	.	.	.	.	.	.	.	.	.	.	.	.	.	.	.	.	.	.
chr12	40698194	.	G	C	.	PASS	CNTN1	intronic	NM_001256063,NM_001843	.	.	.	ENST00000547702.5,ENST00000551295.6	12q12	.	.	Score=300;Name="1000928:MIRb(SINE)"	.	.	.	.	.	.	.	.	.	.	.	.	.	.	.	.	.	.	.	.	.	.	.	.	.	.	.	.	.	.	.	.
chr12	40818074	.	T	G	.	PASS	CNTN1	intronic	NM_001256063,NM_001843	.	.	.	ENST00000547702.5,ENST00000551295.6	12q12	.	.	Score=18466;Name="1001136:L1PA10(LINE)"	.	.	.	.	.	.	.	.	.	.	.	.	.	.	.	.	.	.	.	.	.	.	.	.	.	.	.	.	.	.	.	.
chr12	40835555	.	C	A	.	PASS	CNTN1	intronic	NM_001256063,NM_001256064,NM_001843	.	.	.	ENST00000547849.5,ENST00000547702.5,ENST00000551295.6	12q12	.	.	.	.	.	.	.	.	.	.	.	.	.	.	.	.	.	.	.	.	.	.	.	.	.	.	.	.	.	.	.	.	.	.	.
chr12	41192374	.	A	G	.	PASS	PDZRN4	intronic	NM_001164595	.	.	.	ENST00000402685.6	12q12	.	.	Score=1864;Name="1001735:AluSz(SINE)"	.	.	.	.	.	.	.	.	.	.	.	.	.	.	.	.	.	.	.	.	.	.	.	.	.	.	.	.	.	.	.	.
chr12	41324573	.	G	T	.	PASS	PDZRN4	intronic	NM_001164595	.	.	.	ENST00000402685.6	12q12	.	.	.	.	.	.	.	.	.	.	.	.	.	.	.	.	.	.	.	.	.	.	.	.	.	.	.	.	.	.	.	.	.	.	.
chr12	41710037	.	T	G	.	PASS	.	intergenic	NM_001164595,NR_135041	dist=135447;dist=54152	.	.	.	12q12	.	.	.	.	.	.	.	.	.	.	.	.	.	.	.	.	.	.	.	.	.	.	.	.	.	.	.	.	.	.	.	.	.	.	.
chr12	41804282	.	C	G	.	PASS	.	intergenic	NR_135041,NM_001099650	dist=38701;dist=277564	.	.	.	12q12	.	.	Score=1732;Name="1002661:MLT1E2(LTR)"	.	.	.	.	.	.	.	.	.	.	.	.	.	.	.	.	.	.	.	.	.	.	.	.	.	.	.	.	.	.	.	.
chr12	43231855	.	A	G	.	PASS	.	intergenic	NR_146866,NM_025003	dist=68745;dist=122011	.	.	.	12q12	.	.	Score=27446;Name="1005347:L1PA3(LINE)"	.	.	.	.	.	.	.	.	.	.	.	.	.	.	.	.	.	.	.	.	.	.	.	.	.	.	.	.	.	.	.	.
chr12	43363483	.	C	A	.	PASS	ADAMTS20	intronic	NM_025003	.	.	.	ENST00000389420.7	12q12	.	.	Score=11275;Name="1005605:L1M4b(LINE)"	.	.	.	.	.	.	.	.	.	.	.	.	.	.	.	.	.	.	.	.	.	.	.	.	.	.	.	.	.	.	.	.
chr12	43419493	.	G	C	.	PASS	ADAMTS20	intronic	NM_025003	.	.	.	ENST00000389420.7	12q12	.	.	.	.	.	.	.	.	.	.	.	.	.	.	.	.	.	.	.	.	.	.	.	.	.	.	.	.	.	.	.	.	.	.	.
chr12	43461783	.	A	G	.	PASS	ADAMTS20	intronic	NM_025003	.	.	.	ENST00000553158.5,ENST00000389420.7,ENST00000395541.3	12q12	.	.	.	.	.	.	.	.	.	.	.	.	.	.	.	.	.	.	.	.	.	.	.	.	.	.	.	.	.	.	.	.	.	.	.
chr12	45206702	rs927532917	C	T	.	PASS	PLEKHA8P1	ncRNA_intronic	NR_037144	.	.	.	.	12q12	.	.	Score=187;Name="1008613:(TA)n(Simple_repeat)"	rs927532917	.	.	.	.	.	.	.	.	.	.	.	.	.	.	.	.	.	.	.	.	.	.	.	.	.	.	.	.	.	.	.
chr12	45824672	.	G	T	.	PASS	ARID2	intronic	NM_001347839,NM_152641	.	.	.	ENST00000422737.5,ENST00000334344.10	12q12	.	.	Score=3217;Name="1009771:L1MA4(LINE)"	.	.	.	.	.	.	.	.	.	.	.	.	.	.	.	.	.	.	.	.	.	.	.	.	.	.	.	.	.	.	.	.
chr12	46702506	.	C	G	.	PASS	.	intergenic	NR_125377,NM_018018	dist=49927;dist=62255	.	.	ENST00000611243.1	12q13.11	.	.	.	.	.	.	.	.	.	.	.	.	.	.	.	.	.	.	.	.	.	.	.	.	.	.	.	.	.	.	.	.	.	.	.
chr12	48267409	rs2932097	C	T	.	PASS	.	intergenic	NM_001004134,NM_181788	dist=64117;dist=61571	.	.	ENST00000547523.1	12q13.11	.	.	Score=89;Name="1014038:(CCTT)n(Simple_repeat)"	rs2932097	.	.	.	.	.	.	.	.	.	.	.	.	.	.	.	.	.	.	.	.	.	.	.	.	.	.	.	.	.	.	.
chr12	48648271	.	G	C	.	PASS	.	intergenic	NM_002289,NM_017822	dist=78225;dist=4940	.	.	.	12q13.11	.	.	Score=976;Name="1014662:LTR50(LTR)"	.	.	.	.	.	.	.	.	.	.	.	.	.	.	.	.	.	.	.	.	.	.	.	.	.	.	.	.	.	.	.	.
chr12	49497408	.	C	T	.	PASS	SPATS2	intronic	NM_001293285,NM_001293286,NM_023071	.	.	.	ENST00000321898.10,ENST00000552918.5,ENST00000553127.5	12q13.12	.	.	Score=2558;Name="1016854:AluY(SINE)"	.	.	.	.	.	.	.	.	.	.	.	.	.	.	.	.	.	.	.	.	.	.	.	.	.	.	.	.	.	.	.	.
chr12	50234319	.	A	C	.	PASS	LIMA1	intronic	NM_001113546,NM_016357	.	.	.	ENST00000394943.7,ENST00000341247.8	12q13.12	.	.	Score=2224;Name="1018496:AluSz6(SINE)"	.	.	.	.	.	.	.	.	.	.	.	.	.	.	.	.	.	.	.	.	.	.	.	.	.	.	.	.	.	.	.	.
chr12	51390162	rs557050646	T	C	.	PASS	GALNT6	intronic	NM_007210	.	.	.	ENST00000356317.7	12q13.13	.	.	Score=2400;Name="1021568:AluSq2(SINE)"	rs557050646	.	.	.	.	.	.	.	0.005	.	0.006	0.0477	0.0072	0.0157748	.	.	.	.	.	.	.	.	.	.	.	.	.	.	.	.	.	.
chr12	51705796	.	G	T	.	PASS	SCN8A	intronic	NM_001177984,NM_001330260,NM_014191	.	.	.	ENST00000354534.10,ENST00000599343.5,ENST00000355133.7,ENST00000545061.5,ENST00000627620.2	12q13.13	.	.	.	.	.	.	.	.	.	.	.	.	.	.	.	.	.	.	.	.	.	.	.	.	.	.	.	.	.	.	.	.	.	.	.
chr12	52953837	rs992898699	A	T	.	PASS	.	downstream	NM_000224,NM_199187	.	.	.	.	12q13.13	.	.	Score=2021;Name="1024499:AluSg(SINE)"	rs992898699	.	.	.	.	.	.	.	.	.	.	.	.	.	.	.	.	.	.	.	.	.	.	.	.	.	.	.	.	.	.	.
chr12	53471294	.	A	T	.	PASS	PCBP2	intronic	NM_001098620,NM_001128911,NM_001128912,NM_001128913,NM_001128914,NM_005016,NM_031989	.	.	.	ENST00000552296.6,ENST00000439930.7,ENST00000447282.5,ENST00000359282.9,ENST00000549863.5,ENST00000455667.7,ENST00000359462.9,ENST00000546463.5,ENST00000552819.5,ENST00000437231.5,ENST00000548933.5	12q13.13	.	.	.	.	.	.	.	.	.	.	.	.	.	.	.	.	.	.	.	.	.	.	.	.	.	.	.	.	.	.	.	.	.	.	.
chr12	53857504	.	A	G	.	PASS	.	intergenic	NR_104332,NR_047507	dist=100470;dist=77824	.	.	.	12q13.13	.	.	Score=5515;Name="1026631:L1MB8(LINE)"	.	.	.	.	.	.	.	.	.	.	.	.	.	.	.	.	.	.	.	.	.	.	.	.	.	.	.	.	.	.	.	.
chr12	53922299	.	G	A	.	PASS	.	intergenic	NR_104332,NR_047507	dist=165265;dist=13029	.	.	.	12q13.13	.	.	Score=53;Name="1026780:(TG)n(Simple_repeat)"	.	.	.	.	.	.	.	.	.	.	.	.	.	.	.	.	.	.	.	.	.	.	.	.	.	.	.	.	.	.	.	.
chr12	54213517	.	A	C	.	PASS	.	intergenic	NM_014311,NM_001127322	dist=24523;dist=17429	.	.	.	12q13.13	.	.	Score=374;Name="1027176:L2c(LINE)"	.	.	.	.	.	.	.	.	.	.	.	.	.	.	.	.	.	.	.	.	.	.	.	.	.	.	.	.	.	.	.	.
chr12	54531093	.	C	G	.	PASS	NCKAP1L	intronic	NM_001184976,NM_005337	.	.	.	ENST00000293373.10,ENST00000545638.2	12q13.2	.	.	.	.	.	.	.	.	.	.	.	.	.	.	.	.	.	.	.	.	.	.	.	.	.	.	.	.	.	.	.	.	.	.	.
chr12	54987639	.	G	T	.	PASS	.	intergenic	NM_001136030,NM_021191	dist=2893;dist=32306	.	.	.	12q13.2	.	.	.	.	.	.	.	.	.	.	.	.	.	.	.	.	.	.	.	.	.	.	.	.	.	.	.	.	.	.	.	.	.	.	.
chr12	55088847	.	A	C	.	PASS	.	intergenic	NM_021191,NM_001005243	dist=58830;dist=40922	.	.	.	12q13.2	.	.	Score=2386;Name="1028732:AluSg(SINE)"	.	.	.	.	.	.	.	.	.	.	.	.	.	.	.	.	.	.	.	.	.	.	.	.	.	.	.	.	.	.	.	.
chr12	55540734	.	G	T	.	PASS	.	intergenic	NM_001005519,NM_001005494	dist=47418;dist=10493	.	.	ENST00000556750.5	12q13.2	.	.	Score=24252;Name="1029347:L1PA5(LINE)"	.	.	.	.	.	.	.	.	.	.	.	.	.	.	.	.	.	.	.	.	.	.	.	.	.	.	.	.	.	.	.	.
chr12	55560702	.	G	C	.	PASS	.	intergenic	NM_001005494,NM_001258285	dist=8546;dist=13713	.	.	ENST00000556750.5	12q13.2	.	.	Score=25426;Name="1029374:L1PA3(LINE)"	.	.	.	.	.	.	.	.	.	.	.	.	.	.	.	.	.	.	.	.	.	.	.	.	.	.	.	.	.	.	.	.
chr12	55909936	.	A	C	.	PASS	PYM1	intronic	NM_001143853,NM_032345	.	.	.	ENST00000408946.6,ENST00000398213.4,ENST00000557259.5,ENST00000547925.1	12q13.2	.	.	Score=1112;Name="1030143:AluJo(SINE)"	.	.	.	.	.	.	.	.	.	.	.	.	.	.	.	.	.	.	.	.	.	.	.	.	.	.	.	.	.	.	.	.
chr12	56224462	.	A	C	.	PASS	NABP2	intronic	NM_024068	.	.	.	ENST00000341463.5,ENST00000380198.6,ENST00000267023.8	12q13.3	.	.	Score=12;Name="1030870:G-rich(Low_complexity)"	.	.	.	.	.	.	.	.	.	.	.	.	.	.	.	.	.	.	.	.	.	.	.	.	.	.	.	.	.	.	.	.
chr12	56530380	.	A	T	.	PASS	RBMS2	intronic	NM_002898	.	.	.	ENST00000542360.1,ENST00000550726.5,ENST00000552247.6,ENST00000262031.9	12q13.3	.	.	Score=1919;Name="1031589:AluJb(SINE)"	.	.	.	.	.	.	.	.	.	.	.	.	.	.	.	.	.	.	.	.	.	.	.	.	.	.	.	.	.	.	.	.
chr12	56561544	.	T	C	.	PASS	RBMS2	intronic	NM_002898	.	.	.	ENST00000262031.9,ENST00000550726.5,ENST00000552247.6,ENST00000542360.1	12q13.3	.	.	Score=1973;Name="1031693:AluSx3(SINE)"	.	.	.	.	.	.	.	.	.	.	.	.	.	.	.	.	.	.	.	.	.	.	.	.	.	.	.	.	.	.	.	.
chr12	56567087	.	C	A	.	PASS	RBMS2	intronic	NM_002898	.	.	.	ENST00000542360.1,ENST00000552247.6,ENST00000550726.5,ENST00000262031.9	12q13.3	.	.	.	.	.	.	.	.	.	.	.	.	.	.	.	.	.	.	.	.	.	.	.	.	.	.	.	.	.	.	.	.	.	.	.
chr12	57477657	.	T	G	.	PASS	ARHGAP9	exonic	NM_001080156,NM_001080157,NM_001319850,NM_001319852,NM_032496	.	synonymous SNV	ARHGAP9:NM_001080156:exon2:c.A6C:p.S2S,ARHGAP9:NM_001319852:exon2:c.A6C:p.S2S,ARHGAP9:NM_001080157:exon3:c.A558C:p.S186S,ARHGAP9:NM_032496:exon4:c.A558C:p.S186S,ARHGAP9:NM_001319850:exon7:c.A771C:p.S257S	ENST00000393791.7,ENST00000424809.6,ENST00000550288.5,ENST00000430041.6,ENST00000393797.6	12q13.3	.	.	.	.	.	.	.	.	.	.	.	.	.	.	.	.	.	.	.	.	.	.	.	.	.	.	.	.	.	.	.	.	.	.	.
chr12	58110445	.	T	C	.	PASS	.	intergenic	NR_135022,NR_120452	dist=17085;dist=455514	.	.	.	12q14.1	.	.	Score=21280;Name="1034737:L1PA2(LINE)"	.	.	.	.	.	.	.	.	.	.	.	.	.	.	.	.	.	.	.	.	.	.	.	.	.	.	.	.	.	.	.	.
chr12	58332663	rs373078025	A	G	.	PASS	.	intergenic	NR_135022,NR_120452	dist=239303;dist=233296	.	.	.	12q14.1	.	.	Score=49293;Name="1035100:HERVK-int(LTR)"	rs373078025	.	.	.	.	.	.	.	.	.	.	.	.	.	.	.	.	.	.	.	.	.	.	.	.	.	.	.	.	.	.	.
chr12	58332755	rs4093825	T	A	.	PASS	.	intergenic	NR_135022,NR_120452	dist=239395;dist=233204	.	.	.	12q14.1	.	.	Score=49293;Name="1035100:HERVK-int(LTR)"	rs4093825	.	.	.	.	.	.	.	.	.	.	.	.	.	.	.	.	.	.	.	.	.	.	.	.	.	.	.	.	.	.	.
chr12	58334054	rs111785772	C	T	.	PASS	.	intergenic	NR_135022,NR_120452	dist=240694;dist=231905	.	.	.	12q14.1	.	.	Score=49293;Name="1035100:HERVK-int(LTR)"	rs111785772	.	.	.	.	.	.	.	.	.	.	.	.	.	.	.	.	.	.	.	.	.	.	.	.	.	.	.	.	.	.	.
chr12	59104974	rs574738070	T	C	.	PASS	.	intergenic	NM_153377,NM_001270622	dist=184436;dist=491066	.	.	.	12q14.1	.	.	Score=17318;Name="1036351:HERVH-int(LTR)"	rs574738070	.	.	.	.	.	.	.	.	.	.	0.0083	.	0.00219649	.	.	.	.	.	.	.	.	.	.	.	.	.	.	.	.	.	.
chr12	59740832	.	C	T	.	PASS	SLC16A7	intronic	NM_001270622,NM_001270623,NM_004731	.	.	.	ENST00000552432.5,ENST00000261187.8,ENST00000547379.5,ENST00000552024.5	12q14.1	.	.	Score=6627;Name="1037358:L1PA3(LINE)"	.	.	.	.	.	.	.	.	.	.	.	.	.	.	.	.	.	.	.	.	.	.	.	.	.	.	.	.	.	.	.	.
chr12	60070326	.	T	C	.	PASS	.	intergenic	NM_001270622,NM_178539	dist=280472;dist=1637922	.	.	.	12q14.1	.	.	Score=1684;Name="1037834:THE1D(LTR)"	.	.	.	.	.	.	.	.	.	.	.	.	.	.	.	.	.	.	.	.	.	.	.	.	.	.	.	.	.	.	.	.
chr12	60534406	.	A	C	.	PASS	.	intergenic	NM_001270622,NM_178539	dist=744552;dist=1173842	.	.	.	12q14.1	.	.	.	.	.	.	.	.	.	.	.	.	.	.	.	.	.	.	.	.	.	.	.	.	.	.	.	.	.	.	.	.	.	.	.
chr12	60701208	.	T	G	.	PASS	.	intergenic	NM_001270622,NM_178539	dist=911354;dist=1007040	.	.	.	12q14.1	.	.	Score=2139;Name="1038816:AluSz(SINE)"	.	.	.	.	.	.	.	.	.	.	.	.	.	.	.	.	.	.	.	.	.	.	.	.	.	.	.	.	.	.	.	.
chr12	60751471	rs373478153	G	T	.	PASS	.	intergenic	NM_001270622,NM_178539	dist=961617;dist=956777	.	.	.	12q14.1	.	.	Score=21323;Name="1038896:L1PA8(LINE)"	rs373478153	.	.	.	.	.	.	.	.	.	.	.	.	.	.	.	.	.	.	.	.	.	.	.	.	.	.	.	.	.	.	.
chr12	60831260	.	G	C	.	PASS	.	intergenic	NM_001270622,NM_178539	dist=1041406;dist=876988	.	.	.	12q14.1	.	.	Score=1669;Name="1038994:AluJo(SINE)"	.	.	.	.	.	.	.	.	.	.	.	.	.	.	.	.	.	.	.	.	.	.	.	.	.	.	.	.	.	.	.	.
chr12	61029713	.	T	C	.	PASS	.	intergenic	NM_001270622,NM_178539	dist=1239859;dist=678535	.	.	.	12q14.1	.	.	Score=312;Name="1039288:(TTC)n(Simple_repeat)"	.	.	.	.	.	.	.	.	.	.	.	.	.	.	.	.	.	.	.	.	.	.	.	.	.	.	.	.	.	.	.	.
chr12	61271215	.	A	G	.	PASS	.	intergenic	NM_001270622,NM_178539	dist=1481361;dist=437033	.	.	.	12q14.1	.	.	.	.	.	.	.	.	.	.	.	.	.	.	.	.	.	.	.	.	.	.	.	.	.	.	.	.	.	.	.	.	.	.	.
chr12	61335239	.	A	C	.	PASS	.	intergenic	NM_001270622,NM_178539	dist=1545385;dist=373009	.	.	.	12q14.1	.	.	Score=10581;Name="1039748:MSTA-int(LTR)"	.	.	.	.	.	.	.	.	.	.	.	.	.	.	.	.	.	.	.	.	.	.	.	.	.	.	.	.	.	.	.	.
chr12	61681293	.	G	C	.	PASS	.	intergenic	NM_001270622,NM_178539	dist=1891439;dist=26955	.	.	.	12q14.1	.	.	Score=2512;Name="1040335:THE1B(LTR)"	.	.	.	.	.	.	.	.	.	.	.	.	.	.	.	.	.	.	.	.	.	.	.	.	.	.	.	.	.	.	.	.
chr12	61808681	.	G	T	.	PASS	FAM19A2	intronic	NM_178539	.	.	.	ENST00000551449.1,ENST00000551619.5,ENST00000550003.1,ENST00000416284.7	12q14.1	.	.	.	.	.	.	.	.	.	.	.	.	.	.	.	.	.	.	.	.	.	.	.	.	.	.	.	.	.	.	.	.	.	.	.
chr12	62661028	.	A	C	.	PASS	PPM1H	intronic	NM_020700	.	.	.	ENST00000228705.6	12q14.1	.	.	.	.	.	.	.	.	.	.	.	.	.	.	.	.	.	.	.	.	.	.	.	.	.	.	.	.	.	.	.	.	.	.	.
chr12	62714727	.	A	C	.	PASS	PPM1H	intronic	NM_020700	.	.	.	ENST00000228705.6	12q14.2	.	.	.	.	.	.	.	.	.	.	.	.	.	.	.	.	.	.	.	.	.	.	.	.	.	.	.	.	.	.	.	.	.	.	.
chr12	63100458	.	T	C	.	PASS	.	intergenic	NM_020700,NM_000706	dist=165573;dist=42301	.	.	.	12q14.2	.	.	.	.	.	.	.	.	.	.	.	.	.	.	.	.	.	.	.	.	.	.	.	.	.	.	.	.	.	.	.	.	.	.	.
chr12	63163133	.	T	G	.	PASS	.	intergenic	NM_000706,NM_173812	dist=10323;dist=395780	.	.	.	12q14.2	.	.	Score=1064;Name="1042970:MER39(LTR)"	.	.	.	.	.	.	.	.	.	.	.	.	.	.	.	.	.	.	.	.	.	.	.	.	.	.	.	.	.	.	.	.
chr12	63172928	.	G	C	.	PASS	.	intergenic	NM_000706,NM_173812	dist=20118;dist=385985	.	.	.	12q14.2	.	.	.	.	.	.	.	.	.	.	.	.	.	.	.	.	.	.	.	.	.	.	.	.	.	.	.	.	.	.	.	.	.	.	.
chr12	63720077	.	G	T	.	PASS	.	intergenic	NM_173812,NM_014254	dist=51503;dist=59726	.	.	ENST00000509615.2	12q14.2	.	Score=0.973276;Name=chr7:35099529	.	.	.	.	.	.	.	.	.	.	.	.	.	.	.	.	.	.	.	.	.	.	.	.	.	.	.	.	.	.	.	.	.
chr12	65902419	.	T	G	.	PASS	HMGA2	intronic	NM_001300918,NM_001300919,NM_003483,NM_003484	.	.	.	ENST00000536545.5,ENST00000403681.6,ENST00000354636.7,ENST00000393577.7,ENST00000541363.5	12q14.3	.	.	Score=222;Name="1048251:MIRb(SINE)"	.	.	.	.	.	.	.	.	.	.	.	.	.	.	.	.	.	.	.	.	.	.	.	.	.	.	.	.	.	.	.	.
chr12	66186402	rs549013953	G	A	.	PASS	.	intergenic	NM_001282610,NM_007199	dist=16330;dist=2796	.	.	.	12q14.3	.	.	Score=31;Name="1048752:(TG)n(Simple_repeat)"	rs549013953	.	.	.	.	.	.	.	0.0179	0.0286	0.0258	0.2307	0.0317	0.0796725	.	.	.	.	.	.	.	.	.	.	.	.	.	.	.	.	.	.
chr12	67296504	.	A	C	.	PASS	CAND1	intronic	NM_001329674,NM_001329675,NM_001329676,NM_018448	.	.	.	ENST00000545606.5	12q14.3	.	.	Score=2196;Name="1050822:AluSx1(SINE)"	.	.	.	.	.	.	.	.	.	.	.	.	.	.	.	.	.	.	.	.	.	.	.	.	.	.	.	.	.	.	.	.
chr12	67493641	.	G	C	.	PASS	.	intergenic	NR_146500,NR_103861	dist=51082;dist=26441	.	.	.	12q15	.	.	Score=23422;Name="1051165:L1PA13(LINE)"	.	.	.	.	.	.	.	.	.	.	.	.	.	.	.	.	.	.	.	.	.	.	.	.	.	.	.	.	.	.	.	.
chr12	67898834	.	T	C	.	PASS	.	intergenic	NR_110063,NR_120456	dist=169359;dist=30401	.	.	.	12q15	.	.	.	.	.	.	.	.	.	.	.	.	.	.	.	.	.	.	.	.	.	.	.	.	.	.	.	.	.	.	.	.	.	.	.
chr12	69907357	.	T	A	.	PASS	MYRFL	intronic	NM_182530	.	.	.	ENST00000547771.6,ENST00000552032.6	12q15	.	.	Score=268;Name="1056055:Tigger16b(DNA)"	.	.	.	.	.	.	.	.	.	.	.	.	.	.	.	.	.	.	.	.	.	.	.	.	.	.	.	.	.	.	.	.
chr12	70425783	.	G	A	.	PASS	KCNMB4	intronic	NM_014505	.	.	.	ENST00000258111.4	12q15	.	.	Score=384;Name="1057056:L4_C_Mam(LINE)"	.	.	.	.	.	.	.	.	.	.	.	.	.	.	.	.	.	.	.	.	.	.	.	.	.	.	.	.	.	.	.	.
chr12	71613332	.	T	A	.	PASS	ZFC3H1	intronic	NM_144982	.	.	.	ENST00000378743.7	12q21.1	.	.	.	.	.	.	.	.	.	.	.	.	.	.	.	.	.	.	.	.	.	.	.	.	.	.	0	8.007e-06	0	0	0	0	0	0	0
chr12	71613712	.	G	A	.	PASS	ZFC3H1	intronic	NM_144982	.	.	.	ENST00000378743.7	12q21.1	.	.	Score=258;Name="1059082:MIR3(SINE)"	.	.	.	.	.	.	.	.	.	.	.	.	.	.	.	.	.	.	.	.	.	.	.	.	.	.	.	.	.	.	.	.
chr12	72386059	.	A	G	.	PASS	TRHDE	intronic	NM_013381	.	.	.	ENST00000261180.8	12q21.1	.	.	Score=232;Name="1060540:L2c(LINE)"	.	.	.	.	.	.	.	.	.	.	.	.	.	.	.	.	.	.	.	.	.	.	.	.	.	.	.	.	.	.	.	.
chr12	72531084	.	G	C	.	PASS	TRHDE	intronic	NM_013381	.	.	.	ENST00000261180.8	12q21.1	.	.	Score=765;Name="1060753:L1ME3Cz(LINE)"	.	.	.	.	.	.	.	.	.	.	.	.	.	.	.	.	.	.	.	.	.	.	.	.	.	.	.	.	.	.	.	.
chr12	72637828	.	T	G	.	PASS	TRHDE	intronic	NM_013381	.	.	.	ENST00000261180.8	12q21.1	.	.	Score=27352;Name="1060878:L1PA3(LINE)"	.	.	.	.	.	.	.	.	.	.	.	.	.	.	.	.	.	.	.	.	.	.	.	.	.	.	.	.	.	.	.	.
chr12	72842522	.	T	A	.	PASS	.	intergenic	NM_013381,NR_110130	dist=176880;dist=316668	.	.	.	12q21.1	.	.	Score=18811;Name="1061176:L1PA13(LINE)"	.	.	.	.	.	.	.	.	.	.	.	.	.	.	.	.	.	.	.	.	.	.	.	.	.	.	.	.	.	.	.	.
chr12	73016683	.	T	C	.	PASS	.	intergenic	NM_013381,NR_110130	dist=351041;dist=142507	.	.	.	12q21.1	.	.	Score=3344;Name="1061454:L1MCb(LINE)"	.	.	.	.	.	.	.	.	.	.	.	.	.	.	.	.	.	.	.	.	.	.	.	.	.	.	.	.	.	.	.	.
chr12	73099174	.	T	A	.	PASS	.	intergenic	NM_013381,NR_110130	dist=433532;dist=60016	.	.	.	12q21.1	.	.	.	.	.	.	.	.	.	.	.	.	.	.	.	.	.	.	.	.	.	.	.	.	.	.	.	.	.	.	.	.	.	.	.
chr12	73115792	.	C	G	.	PASS	.	intergenic	NM_013381,NR_110130	dist=450150;dist=43398	.	.	.	12q21.1	.	.	Score=17;Name="1061610:(CT)n(Simple_repeat)"	.	.	.	.	.	.	.	.	.	.	.	.	.	.	.	.	.	.	.	.	.	.	.	.	.	.	.	.	.	.	.	.
chr12	73230492	.	C	A	.	PASS	.	intergenic	NR_110130,NR_038300	dist=22175;dist=902684	.	.	.	12q21.1	.	.	Score=2470;Name="1061775:L1MEc(LINE)"	.	.	.	.	.	.	.	.	.	.	.	.	.	.	.	.	.	.	.	.	.	.	.	.	.	.	.	.	.	.	.	.
chr12	73240999	.	G	C	.	PASS	.	intergenic	NR_110130,NR_038300	dist=32682;dist=892177	.	.	.	12q21.1	.	.	Score=4035;Name="1061789:L1PA7(LINE)"	.	.	.	.	.	.	.	.	.	.	.	.	.	.	.	.	.	.	.	.	.	.	.	.	.	.	.	.	.	.	.	.
chr12	73818023	.	A	T	.	PASS	.	intergenic	NR_110130,NR_038300	dist=609706;dist=315153	.	.	.	12q21.1	.	.	.	.	.	.	.	.	.	.	.	.	.	.	.	.	.	.	.	.	.	.	.	.	.	.	.	.	.	.	.	.	.	.	.
chr12	74070969	.	C	G	.	PASS	.	intergenic	NR_110130,NR_038300	dist=862652;dist=62207	.	.	.	12q21.1	.	.	Score=21542;Name="1063068:L1PA10(LINE)"	.	.	.	.	.	.	.	.	.	.	.	.	.	.	.	.	.	.	.	.	.	.	.	.	.	.	.	.	.	.	.	.
chr12	74145859	.	A	C	.	PASS	LOC100507377	ncRNA_intronic	NR_038300	.	.	.	ENST00000549905.5	12q21.1	.	.	Score=2243;Name="1063177:L1M8(LINE)"	.	.	.	.	.	.	.	.	.	.	.	.	.	.	.	.	.	.	.	.	.	.	.	.	.	.	.	.	.	.	.	.
chr12	74211157	.	T	G	.	PASS	LOC100507377	ncRNA_intronic	NR_038300	.	.	.	ENST00000549905.5,ENST00000515416.6	12q21.1	.	.	.	.	.	.	.	.	.	.	.	.	.	.	.	.	.	.	.	.	.	.	.	.	.	.	.	.	.	.	.	.	.	.	.
chr12	74674777	.	G	C	.	PASS	.	intergenic	NM_001136262,NM_001260499	dist=133325;dist=365301	.	.	.	12q21.1	.	.	.	.	.	.	.	.	.	.	.	.	.	.	.	.	.	.	.	.	.	.	.	.	.	.	.	.	.	.	.	.	.	.	.
chr12	75144297	.	A	T	.	PASS	KCNC2	intronic	NM_001260497,NM_001260498,NM_001260499,NM_139136,NM_139137,NM_153748	.	.	.	ENST00000540018.5,ENST00000393288.2,ENST00000298972.5,ENST00000549446.5,ENST00000350228.6,ENST00000550433.5,ENST00000548513.5	12q21.1	.	.	.	.	.	.	.	.	.	.	.	.	.	.	.	.	.	.	.	.	.	.	.	.	.	.	.	.	.	.	.	.	.	.	.
chr12	75243013	.	A	T	.	PASS	.	intergenic	NM_001260499,NM_032606	dist=33265;dist=32966	.	.	ENST00000549953.1,ENST00000548779.1	12q21.1	.	.	.	.	.	.	.	.	.	.	.	.	.	.	.	.	.	.	.	.	.	.	.	.	.	.	.	.	.	.	.	.	.	.	.
chr12	75283096	.	A	C	.	PASS	CAPS2	intronic	NM_001286547,NM_001286548,NM_001286549,NM_032606	.	.	.	ENST00000393284.7,ENST00000409799.5,ENST00000409445.7,ENST00000549953.1	12q21.1	.	.	.	.	.	.	.	.	.	.	.	.	.	.	.	.	.	.	.	.	.	.	.	.	.	.	.	.	.	.	.	.	.	.	.
chr12	76030747	.	T	G	.	PASS	PHLDA1	exonic	NM_007350	.	missense SNV	PHLDA1:NM_007350:exon1:c.A995C:p.Q332P	ENST00000266671.9,ENST00000602540.5,ENST00000552367.1,ENST00000619060.1	12q21.2	.	.	Score=81;Name="1066378:(TGCGGC)n(Simple_repeat)"	.	.	.	.	.	.	.	.	.	.	.	.	.	.	.	.	.	.	.	.	.	.	.	.	.	.	.	.	.	.	.	.
chr12	76433481	.	G	C	.	PASS	OSBPL8	intronic	NM_001003712,NM_001319652,NM_001319653,NM_020841	.	.	.	ENST00000393250.8,ENST00000261183.7,ENST00000393249.6,ENST00000611266.4	12q21.2	.	.	Score=8278;Name="1067257:L1MA9(LINE)"	.	.	.	.	.	.	.	.	.	.	.	.	.	.	.	.	.	.	.	.	.	.	.	.	.	.	.	.	.	.	.	.
chr12	77140714	.	A	C	.	PASS	.	intergenic	NM_203394,NM_014903	dist=75134;dist=690575	.	.	.	12q21.2	.	.	.	.	.	.	.	.	.	.	.	.	.	.	.	.	.	.	.	.	.	.	.	.	.	.	.	.	.	.	.	.	.	.	.
chr12	77175395	.	A	C	.	PASS	.	intergenic	NM_203394,NM_014903	dist=109815;dist=655894	.	.	.	12q21.2	.	.	Score=28099;Name="1068822:L1PA2(LINE)"	.	.	.	.	.	.	.	.	.	.	.	.	.	.	.	.	.	.	.	.	.	.	.	.	.	.	.	.	.	.	.	.
chr12	77317275	.	G	A	.	PASS	.	intergenic	NM_203394,NM_014903	dist=251695;dist=514014	.	.	.	12q21.2	.	.	.	.	.	.	.	.	.	.	.	.	.	.	.	.	.	.	.	.	.	.	.	.	.	.	.	.	.	.	.	.	.	.	.
chr12	77434925	.	T	A	.	PASS	.	intergenic	NM_203394,NM_014903	dist=369345;dist=396364	.	.	ENST00000550042.1	12q21.2	.	.	.	.	.	.	.	.	.	.	.	.	.	.	.	.	.	.	.	.	.	.	.	.	.	.	.	.	.	.	.	.	.	.	.
chr12	77730784	.	T	A	.	PASS	.	intergenic	NM_203394,NM_014903	dist=665204;dist=100505	.	.	.	12q21.2	.	.	Score=1566;Name="1069661:HAL1(LINE)"	.	.	.	.	.	.	.	.	.	.	.	.	.	.	.	.	.	.	.	.	.	.	.	.	.	.	.	.	.	.	.	.
chr12	77803556	rs529644104	T	C	.	PASS	.	intergenic	NM_203394,NM_014903	dist=737976;dist=27733	.	.	.	12q21.2	.	.	Score=22391;Name="1069781:L1PA8(LINE)"	rs529644104	.	.	.	.	.	.	.	.	.	.	.	.	.	.	.	.	.	.	.	.	.	.	.	.	.	.	.	.	.	.	.
chr12	77871390	.	C	G	.	PASS	NAV3	intronic	NM_001024383,NM_014903	.	.	.	ENST00000397909.6,ENST00000536525.6	12q21.2	.	.	Score=6862;Name="1069879:L1PA7(LINE)"	.	.	.	.	.	.	.	.	.	.	.	.	.	.	.	.	.	.	.	.	.	.	.	.	.	.	.	.	.	.	.	.
chr12	77890821	.	C	G	.	PASS	NAV3	intronic	NM_001024383,NM_014903	.	.	.	ENST00000397909.6,ENST00000536525.6	12q21.2	.	.	.	.	.	.	.	.	.	.	.	.	.	.	.	.	.	.	.	.	.	.	.	.	.	.	.	.	.	.	.	.	.	.	.
chr12	78066644	.	A	G	.	PASS	NAV3	intronic	NM_001024383,NM_014903	.	.	.	ENST00000397909.6,ENST00000549103.1,ENST00000536525.6	12q21.2	.	.	.	.	.	.	.	.	.	.	.	.	.	.	.	.	.	.	.	.	.	.	.	.	.	.	.	.	.	.	.	.	.	.	.
chr12	78589162	.	T	C	.	PASS	.	intergenic	NR_135021,NM_001135805	dist=229416;dist=274831	.	.	.	12q21.2	.	.	.	.	.	.	.	.	.	.	.	.	.	.	.	.	.	.	.	.	.	.	.	.	.	.	.	.	.	.	.	.	.	.	.
chr12	79569983	.	T	G	.	PASS	.	intergenic	NM_001135805,NM_002583	dist=117975;dist=21982	.	.	.	12q21.2	.	.	Score=7355;Name="1072521:L1MA4A(LINE)"	.	.	.	.	.	.	.	.	.	.	.	.	.	.	.	.	.	.	.	.	.	.	.	.	.	.	.	.	.	.	.	.
chr12	80281661	.	T	G	.	PASS	OTOGL	intronic	NM_173591	.	.	.	ENST00000458043.6,ENST00000547103.5	12q21.31	.	.	Score=6052;Name="1073877:L1PA15(LINE)"	.	.	.	.	.	.	.	.	.	.	.	.	.	.	.	.	.	.	.	.	.	.	.	.	.	.	.	.	.	.	.	.
chr12	80617929	.	G	A	.	PASS	PTPRQ	intronic	NM_001145026	.	.	.	ENST00000616559.4,ENST00000614701.4	12q21.31	.	.	Score=1021;Name="1074388:LTR16B1(LTR)"	.	.	.	.	.	.	.	.	.	.	.	.	.	.	.	.	.	.	.	.	.	.	.	.	.	.	.	.	.	.	.	.
chr12	81037395	.	C	G	.	PASS	.	intergenic	NM_004664,NM_001330243	dist=99480;dist=40623	.	.	.	12q21.31	.	.	.	.	.	.	.	.	.	.	.	.	.	.	.	.	.	.	.	.	.	.	.	.	.	.	.	.	.	.	.	.	.	.	.
chr12	81186873	.	A	T	.	PASS	ACSS3	intronic	NM_001330242,NM_001330243,NM_024560	.	.	.	ENST00000548058.5,ENST00000261206.7	12q21.31	.	.	Score=13965;Name="1075398:L1MA9(LINE)"	.	.	.	.	.	.	.	.	.	.	.	.	.	.	.	.	.	.	.	.	.	.	.	.	.	.	.	.	.	.	.	.
chr12	81471427	.	G	C	.	PASS	PPFIA2	intronic	NM_001220473,NM_001220474,NM_001220475,NM_001220476,NM_001220477,NM_001220478,NM_001282536,NM_003625	.	.	.	ENST00000550272.1,ENST00000407050.8,ENST00000333447.11,ENST00000549396.5,ENST00000443686.7,ENST00000550584.6,ENST00000549325.5,ENST00000548586.5,ENST00000550359.6,ENST00000552948.5	12q21.31	.	.	Score=1384;Name="1075811:AluJr(SINE)"	.	.	.	.	.	.	.	.	.	.	.	.	.	.	.	.	.	.	.	.	.	.	.	.	.	.	.	.	.	.	.	.
chr12	81662447	.	C	G	.	PASS	PPFIA2	intronic	NM_001220473,NM_001220474,NM_001220475,NM_001220476,NM_003625	.	.	.	ENST00000549396.5,ENST00000549325.5,ENST00000548586.5,ENST00000550584.6,ENST00000552948.5	12q21.31	.	.	Score=25564;Name="1076103:L1PA4(LINE)"	.	.	.	.	.	.	.	.	.	.	.	.	.	.	.	.	.	.	.	.	.	.	.	.	.	.	.	.	.	.	.	.
chr12	81725594	.	C	G	.	PASS	PPFIA2	intronic	NM_001220473,NM_001220474,NM_001220475,NM_001220476,NM_003625	.	.	.	ENST00000548586.5,ENST00000549325.5,ENST00000550584.6,ENST00000549396.5,ENST00000552948.5	12q21.31	.	.	Score=351;Name="1076198:L1M5(LINE)"	.	.	.	.	.	.	.	.	.	.	.	.	.	.	.	.	.	.	.	.	.	.	.	.	.	.	.	.	.	.	.	.
chr12	81734856	.	T	A	.	PASS	PPFIA2	intronic	NM_001220473,NM_001220474,NM_001220475,NM_001220476,NM_003625	.	.	.	ENST00000552948.5,ENST00000549396.5,ENST00000549325.5,ENST00000548586.5,ENST00000550584.6	12q21.31	.	.	Score=3776;Name="1076213:L1MB8(LINE)"	.	.	.	.	.	.	.	.	.	.	.	.	.	.	.	.	.	.	.	.	.	.	.	.	.	.	.	.	.	.	.	.
chr12	82323312	.	T	C	.	PASS	.	intergenic	NR_110089,NM_014167	dist=330179;dist=28992	.	.	.	12q21.31	.	.	Score=30;Name="1077216:(TA)n(Simple_repeat)"	.	.	.	.	.	.	.	.	.	.	.	.	.	.	.	.	.	.	.	.	.	.	.	.	.	.	.	.	.	.	.	.
chr12	82340660	.	A	C	.	PASS	.	intergenic	NR_110089,NM_014167	dist=347527;dist=11644	.	.	.	12q21.31	.	.	Score=786;Name="1077261:L1PA15(LINE)"	.	.	.	.	.	.	.	.	.	.	.	.	.	.	.	.	.	.	.	.	.	.	.	.	.	.	.	.	.	.	.	.
chr12	83168456	.	T	G	.	PASS	.	intergenic	NM_152588,NM_182767	dist=33588;dist=1691032	.	.	.	12q21.31	.	.	.	.	.	.	.	.	.	.	.	.	.	.	.	.	.	.	.	.	.	.	.	.	.	.	.	.	.	.	.	.	.	.	.
chr12	83342016	.	C	A	.	PASS	.	intergenic	NM_152588,NM_182767	dist=207148;dist=1517472	.	.	.	12q21.31	.	.	Score=6501;Name="1078835:L1MA2(LINE)"	.	.	.	.	.	.	.	.	.	.	.	.	.	.	.	.	.	.	.	.	.	.	.	.	.	.	.	.	.	.	.	.
chr12	83849249	.	G	C	.	PASS	.	intergenic	NM_152588,NM_182767	dist=714381;dist=1010239	.	.	.	12q21.31	.	.	.	.	.	.	.	.	.	.	.	.	.	.	.	.	.	.	.	.	.	.	.	.	.	.	.	.	.	.	.	.	.	.	.
chr12	84152567	.	C	G	.	PASS	.	intergenic	NM_152588,NM_182767	dist=1017699;dist=706921	.	.	.	12q21.31	.	.	Score=7774;Name="1080002:L1PA16(LINE)"	.	.	.	.	.	.	.	.	.	.	.	.	.	.	.	.	.	.	.	.	.	.	.	.	.	.	.	.	.	.	.	.
chr12	84202412	.	C	A	.	PASS	.	intergenic	NM_152588,NM_182767	dist=1067544;dist=657076	.	.	.	12q21.31	.	.	.	.	.	.	.	.	.	.	.	.	.	.	.	.	.	.	.	.	.	.	.	.	.	.	.	.	.	.	.	.	.	.	.
chr12	84346747	.	T	G	.	PASS	.	intergenic	NM_152588,NM_182767	dist=1211879;dist=512741	.	.	.	12q21.31	.	.	Score=10795;Name="1080322:L1PA16(LINE)"	.	.	.	.	.	.	.	.	.	.	.	.	.	.	.	.	.	.	.	.	.	.	.	.	.	.	.	.	.	.	.	.
chr12	85018909	.	T	A	.	PASS	TSPAN19	intronic	NM_001100917	.	.	.	ENST00000532498.6	12q21.31	.	.	Score=912;Name="1081425:MIR(SINE)"	.	.	.	.	.	.	.	.	.	.	.	.	.	.	.	.	.	.	.	.	.	.	.	.	.	.	.	.	.	.	.	.
chr12	85249162	.	G	T	.	PASS	.	intergenic	NM_001079910,NM_006982	dist=4057;dist=31096	.	.	.	12q21.31	.	.	.	.	.	.	.	.	.	.	.	.	.	.	.	.	.	.	.	.	.	.	.	.	.	.	.	.	.	.	.	.	.	.	.
chr12	85270422	.	T	C	.	PASS	.	intergenic	NM_001079910,NM_006982	dist=25317;dist=9836	.	.	.	12q21.31	.	.	.	.	.	.	.	.	.	.	.	.	.	.	.	.	.	.	.	.	.	.	.	.	.	.	.	.	.	.	.	.	.	.	.
chr12	85392501	.	A	C	.	PASS	.	intergenic	NM_006982,NM_005447	dist=90718;dist=412052	.	.	.	12q21.31	.	.	.	.	.	.	.	.	.	.	.	.	.	.	.	.	.	.	.	.	.	.	.	.	.	.	.	.	.	.	.	.	.	.	.
chr12	86366049	.	C	A	.	PASS	MGAT4C	intronic	NM_001351285,NM_001351286,NM_013244	.	.	.	ENST00000621808.4	12q21.32	.	.	Score=5146;Name="1083581:L1M4c(LINE)"	.	.	.	.	.	.	.	.	.	.	.	.	.	.	.	.	.	.	.	.	.	.	.	.	.	.	.	.	.	.	.	.
chr12	87217494	.	T	C	.	PASS	.	intergenic	NM_001351285,NR_135020	dist=378488;dist=113245	.	.	.	12q21.32	.	.	.	.	.	.	.	.	.	.	.	.	.	.	.	.	.	.	.	.	.	.	.	.	.	.	.	.	.	.	.	.	.	.	.
chr12	87236445	.	A	C	.	PASS	.	intergenic	NM_001351285,NR_135020	dist=397439;dist=94294	.	.	.	12q21.32	.	.	.	.	.	.	.	.	.	.	.	.	.	.	.	.	.	.	.	.	.	.	.	.	.	.	.	.	.	.	.	.	.	.	.
chr12	87243352	.	T	C	.	PASS	.	intergenic	NM_001351285,NR_135020	dist=404346;dist=87387	.	.	.	12q21.32	.	.	.	.	.	.	.	.	.	.	.	.	.	.	.	.	.	.	.	.	.	.	.	.	.	.	.	.	.	.	.	.	.	.	.
chr12	88211334	.	C	G	.	PASS	.	intergenic	NM_181783,NM_003994	dist=11447;dist=281459	.	.	.	12q21.32	.	.	Score=14995;Name="1086484:HERVL-int(LTR)"	.	.	.	.	.	.	.	.	.	.	.	.	.	.	.	.	.	.	.	.	.	.	.	.	.	.	.	.	.	.	.	.
chr12	88556004	.	A	C	.	PASS	KITLG	intronic	NM_000899,NM_003994	.	.	.	ENST00000347404.9,ENST00000357116.4,ENST00000228280.9	12q21.32	.	.	.	.	.	.	.	.	.	.	.	.	.	.	.	.	.	.	.	.	.	.	.	.	.	.	.	.	.	.	.	.	.	.	.
chr12	89445751	.	A	T	.	PASS	POC1B	intronic	NM_001199777,NM_172240	.	.	.	ENST00000549504.1,ENST00000549035.1,ENST00000393179.8,ENST00000313546.7	12q21.33	.	.	Score=23948;Name="1088671:L1PA5(LINE)"	.	.	.	.	.	.	.	.	.	.	.	.	.	.	.	.	.	.	.	.	.	.	.	.	.	.	.	.	.	.	.	.
chr12	89569281	rs11105334	G	A	.	PASS	.	intergenic	NR_146294,NM_001682	dist=27739;dist=18768	.	.	ENST00000552778.2	12q21.33	.	.	Score=38;Name="1088935:(CA)n(Simple_repeat)"	rs11105334	.	.	.	.	.	.	.	0.2688	0.4305	0.3569	0.4017	0.2709	0.353435	.	.	.	.	.	.	.	.	.	.	.	.	.	.	.	.	.	.
chr12	89900702	.	C	A	.	PASS	.	intergenic	NR_028138,NR_135019	dist=188750;dist=46991	.	.	ENST00000547370.5	12q21.33	.	.	Score=2261;Name="1089525:THE1D(LTR)"	.	.	.	.	.	.	.	.	.	.	.	.	.	.	.	.	.	.	.	.	.	.	.	.	.	.	.	.	.	.	.	.
chr12	90920487	.	T	G	.	PASS	LINC00615	ncRNA_intronic	NR_038868	.	.	.	ENST00000546725.1	12q21.33	.	.	Score=2931;Name="1091339:Tigger17a(DNA)"	.	.	.	.	.	.	.	.	.	.	.	.	.	.	.	.	.	.	.	.	.	.	.	.	.	.	.	.	.	.	.	.
chr12	91729621	.	A	C	.	PASS	.	intergenic	NM_001920,NR_046159	dist=546497;dist=255355	.	.	.	12q21.33	.	.	Score=1112;Name="1092661:ERVL-int(LTR)"	.	.	.	.	.	.	.	.	.	.	.	.	.	.	.	.	.	.	.	.	.	.	.	.	.	.	.	.	.	.	.	.
chr12	92256177	.	G	A	.	PASS	.	intergenic	NR_135036,NM_001025232	dist=70393;dist=163917	.	.	ENST00000615716.1	12q22	.	.	.	.	.	.	.	.	.	.	.	.	.	.	.	.	.	.	.	.	.	.	.	.	.	.	.	.	.	.	.	.	.	.	.
chr12	92825436	.	G	A	.	PASS	EEA1	intronic	NM_003566	.	.	.	ENST00000322349.12	12q22	.	.	Score=2304;Name="1094779:AluYk3(SINE)"	.	.	.	.	.	.	.	.	.	.	.	.	.	.	.	.	.	.	.	.	.	.	.	.	.	.	.	.	.	.	.	.
chr12	92919857	.	C	G	.	PASS	EEA1	intronic	NM_003566	.	.	.	ENST00000322349.12	12q22	.	.	Score=28724;Name="1094985:L1PA2(LINE)"	.	.	.	.	.	.	.	.	.	.	.	.	.	.	.	.	.	.	.	.	.	.	.	.	.	.	.	.	.	.	.	.
chr12	92972294	.	C	T	.	PASS	.	intergenic	NM_003566,NR_040096	dist=42963;dist=31464	.	.	.	12q22	.	.	.	.	.	.	.	.	.	.	.	.	.	.	.	.	.	.	.	.	.	.	.	.	.	.	.	.	.	.	.	.	.	.	.
chr12	93361827	.	A	C	.	PASS	LOC643339	ncRNA_intronic	NR_040096	.	.	.	ENST00000552835.5	12q22	.	.	.	.	.	.	.	.	.	.	.	.	.	.	.	.	.	.	.	.	.	.	.	.	.	.	.	.	.	.	.	.	.	.	.
chr12	93912730	.	A	C	.	PASS	.	ncRNA_intronic	NR_135017	.	.	.	ENST00000550687.1	12q22	.	.	.	.	.	.	.	.	.	.	.	.	.	.	.	.	.	.	.	.	.	.	.	.	.	.	.	.	.	.	.	.	.	.	.
chr12	94253422	.	G	C	.	PASS	PLXNC1	intronic	NM_005761	.	.	.	ENST00000258526.8	12q22	.	.	.	.	.	.	.	.	.	.	.	.	.	.	.	.	.	.	.	.	.	.	.	.	.	.	.	.	.	.	.	.	.	.	.
chr12	94625023	.	C	T	.	PASS	TMCC3	intronic	NM_020698	.	.	.	ENST00000261226.8	12q22	.	.	Score=2265;Name="1098834:AluSq2(SINE)"	.	.	.	.	.	.	.	.	.	.	.	.	.	.	.	.	.	.	.	.	.	.	.	.	.	.	.	.	.	.	.	.
chr12	94650550	.	T	G	.	PASS	TMCC3	UTR5	NM_020698	NM_020698:c.-120A>C	.	.	ENST00000261226.8	12q22	.	.	.	.	.	.	.	.	.	.	.	.	.	.	.	.	.	.	.	.	.	.	.	.	.	.	.	.	.	.	.	.	.	.	.
chr12	94663359	.	C	G	.	PASS	.	intergenic	NM_020698,NR_030171	dist=12797;dist=171039	.	.	.	12q22	.	.	.	.	.	.	.	.	.	.	.	.	.	.	.	.	.	.	.	.	.	.	.	.	.	.	.	.	.	.	.	.	.	.	.
chr12	95752287	.	A	G	.	PASS	NTN4	intronic	NM_001329700,NM_001329701,NM_001329702,NM_021229	.	.	.	ENST00000553059.1,ENST00000344911.8,ENST00000343702.8,ENST00000538383.5	12q22	.	.	Score=15961;Name="1101553:HERVH-int(LTR)"	.	.	.	.	.	.	.	.	.	.	.	.	.	.	.	.	.	.	.	.	.	.	.	.	.	.	.	.	.	.	.	.
chr12	95952890	rs986508965	G	A	.	PASS	AMDHD1	intronic	NM_152435	.	.	.	ENST00000266736.6	12q23.1	.	.	.	rs986508965	.	.	.	.	.	.	.	.	.	.	.	.	.	.	.	.	.	.	.	.	.	.	.	.	.	.	.	.	.	.	.
chr12	96738194	.	C	T	.	PASS	CFAP54	intronic	NM_001306084	.	.	.	ENST00000524981.8	12q23.1	.	.	Score=738;Name="1103679:L2(LINE)"	.	.	.	.	.	.	.	.	.	.	.	.	.	.	.	.	.	.	.	.	.	.	.	.	.	.	.	.	.	.	.	.
chr12	97218737	.	T	G	.	PASS	.	intergenic	NM_152905,NR_024037	dist=265046;dist=246284	.	.	.	12q23.1	.	.	.	.	.	.	.	.	.	.	.	.	.	.	.	.	.	.	.	.	.	.	.	.	.	.	.	.	.	.	.	.	.	.	.
chr12	97949578	.	G	T	.	PASS	.	intergenic	NR_039716,NR_036189	dist=10457;dist=45805	.	.	.	12q23.1	.	.	Score=2764;Name="1105855:L2a(LINE)"	.	.	.	.	.	.	.	.	.	.	.	.	.	.	.	.	.	.	.	.	.	.	.	.	.	.	.	.	.	.	.	.
chr12	97989014	.	A	C	.	PASS	.	intergenic	NR_039716,NR_036189	dist=49893;dist=6369	.	.	.	12q23.1	.	.	Score=906;Name="1105927:(GGAAGGGAAG)n(Simple_repeat)"	.	.	.	.	.	.	.	.	.	.	.	.	.	.	.	.	.	.	.	.	.	.	.	.	.	.	.	.	.	.	.	.
chr12	98250132	.	G	T	.	PASS	.	intergenic	NR_036189,NR_033801	dist=254684;dist=203709	.	.	ENST00000548344.1	12q23.1	.	.	Score=2808;Name="1106413:AluYb8(SINE)"	.	.	.	.	.	.	.	.	.	.	.	.	.	.	.	.	.	.	.	.	.	.	.	.	.	.	.	.	.	.	.	.
chr12	98594012	.	A	C	.	PASS	SLC25A3	exonic	NM_002635,NM_005888,NM_213611	.	missense SNV	SLC25A3:NM_213611:exon1:c.A34C:p.N12H,SLC25A3:NM_002635:exon2:c.A34C:p.N12H,SLC25A3:NM_005888:exon2:c.A34C:p.N12H	ENST00000551265.5,ENST00000547534.5,ENST00000549338.5,ENST00000228318.7,ENST00000401722.7,ENST00000188376.9,ENST00000548847.1,ENST00000551917.5,ENST00000552981.5	12q23.1	.	.	.	.	.	.	.	.	.	.	.	.	.	.	.	.	.	.	.	.	.	.	.	.	.	.	.	.	.	.	.	.	.	.	.
chr12	99293356	.	T	G	.	PASS	ANKS1B	intronic	NM_152788	.	.	.	ENST00000547010.5,ENST00000547776.6	12q23.1	.	.	Score=7159;Name="1108540:L1PA6(LINE)"	.	.	.	.	.	.	.	.	.	.	.	.	.	.	.	.	.	.	.	.	.	.	.	.	.	.	.	.	.	.	.	.
chr12	99530214	.	C	T	.	PASS	ANKS1B	intronic	NM_152788	.	.	.	ENST00000547776.6,ENST00000547010.5	12q23.1	.	.	.	.	.	.	.	.	.	.	.	.	.	.	.	.	.	.	.	.	.	.	.	.	.	.	.	.	.	.	.	.	.	.	.
chr12	99692270	.	G	T	.	PASS	ANKS1B	intronic	NM_152788	.	.	.	ENST00000547010.5,ENST00000547776.6	12q23.1	.	.	Score=2209;Name="1109209:L2a(LINE)"	.	.	.	.	.	.	.	.	.	.	.	.	.	.	.	.	.	.	.	.	.	.	.	.	.	.	.	.	.	.	.	.
chr12	100294338	.	A	T	.	PASS	SCYL2	intronic	NM_001317784,NM_001330253,NM_001330254,NM_001330256,NM_017988	.	.	.	ENST00000360820.6	12q23.1	.	.	Score=7344;Name="1110484:SVA_D(Retroposon)"	.	.	.	.	.	.	.	.	.	.	.	.	.	.	.	.	.	.	.	.	.	.	.	.	.	.	.	.	.	.	.	.
chr12	100376920	.	A	C	.	PASS	SLC17A8	intronic	NM_001145288,NM_139319	.	.	.	ENST00000323346.9,ENST00000392989.3	12q23.1	.	.	Score=2445;Name="1110649:AluSx1(SINE)"	.	.	.	.	.	.	.	.	.	.	.	.	.	.	.	.	.	.	.	.	.	.	.	.	.	.	.	.	.	.	.	.
chr12	100423928	.	G	T	.	PASS	.	intergenic	NM_139319,NM_005123	dist=1869;dist=49845	.	.	.	12q23.1	.	.	Score=2446;Name="1110779:L1MEg(LINE)"	.	.	.	.	.	.	.	.	.	.	.	.	.	.	.	.	.	.	.	.	.	.	.	.	.	.	.	.	.	.	.	.
chr12	100454682	.	C	A	.	PASS	.	intergenic	NM_139319,NM_005123	dist=32623;dist=19091	.	.	.	12q23.1	.	.	.	.	.	.	.	.	.	.	.	.	.	.	.	.	.	.	.	.	.	.	.	.	.	.	.	.	.	.	.	.	.	.	.
chr12	101119407	.	T	A	.	PASS	ANO4	intronic	NM_001286615,NM_001286616,NM_178826	.	.	.	ENST00000550015.1,ENST00000392979.7,ENST00000392977.7	12q23.1	.	.	Score=1959;Name="1112179:AluSz(SINE)"	.	.	.	.	.	.	.	.	.	.	.	.	.	.	.	.	.	.	.	.	.	.	.	.	.	.	.	.	.	.	.	.
chr12	101223005	.	C	T	.	PASS	.	intergenic	NM_145913,NM_014503	dist=12767;dist=57122	.	.	.	12q23.2	.	.	Score=3617;Name="1112333:HAL1(LINE)"	.	.	.	.	.	.	.	.	.	.	.	.	.	.	.	.	.	.	.	.	.	.	.	.	.	.	.	.	.	.	.	.
chr12	101381926	.	A	C	.	PASS	UTP20	intronic	NM_014503	.	.	.	ENST00000261637.4	12q23.2	.	.	Score=2173;Name="1112700:AluSz(SINE)"	.	.	.	.	.	.	.	.	.	.	.	.	.	.	.	.	.	.	.	.	.	.	.	.	.	.	.	.	.	.	.	.
chr12	101527600	.	G	A	.	PASS	.	intergenic	NM_152323,NM_001254722	dist=40603;dist=67331	.	.	.	12q23.2	.	.	.	.	.	.	.	.	.	.	.	.	.	.	.	.	.	.	.	.	.	.	.	.	.	.	.	.	.	.	.	.	.	.	.
chr12	101998535	.	T	G	.	PASS	.	intergenic	NM_018370,NM_001301107	dist=74912;dist=14305	.	.	.	12q23.2	.	.	Score=2255;Name="1114199:AluSz(SINE)"	.	.	.	.	.	.	.	.	.	.	.	.	.	.	.	.	.	.	.	.	.	.	.	.	.	.	.	.	.	.	.	.
chr12	102372115	.	G	C	.	PASS	.	intergenic	NM_002674,NM_000618	dist=174270;dist=23752	.	.	ENST00000626826.1	12q23.2	.	.	Score=574;Name="1114846:L2c(LINE)"	.	.	.	.	.	.	.	.	.	.	.	.	.	.	.	.	.	.	.	.	.	.	.	.	.	.	.	.	.	.	.	.
chr12	102577207	.	T	C	.	PASS	.	intergenic	NM_000618,NR_033855	dist=96562;dist=232076	.	.	.	12q23.2	.	.	Score=638;Name="1115224:L2(LINE)"	.	.	.	.	.	.	.	.	.	.	.	.	.	.	.	.	.	.	.	.	.	.	.	.	.	.	.	.	.	.	.	.
chr12	102792470	.	A	G	.	PASS	.	intergenic	NM_000618,NR_033855	dist=311825;dist=16813	.	.	.	12q23.2	.	.	.	.	.	.	.	.	.	.	.	.	.	.	.	.	.	.	.	.	.	.	.	.	.	.	.	.	.	.	.	.	.	.	.
chr12	103059045	.	C	G	.	PASS	.	intergenic	NM_004316,NR_126333	dist=98529;dist=92797	.	.	.	12q23.2	.	.	Score=18215;Name="1116174:L1PA8(LINE)"	.	.	.	.	.	.	.	.	.	.	.	.	.	.	.	.	.	.	.	.	.	.	.	.	.	.	.	.	.	.	.	.
chr12	103326762	.	G	T	.	PASS	C12orf42	intronic	NM_001099336,NM_001278419,NM_001278420,NM_198521	.	.	.	ENST00000378113.6,ENST00000548048.5,ENST00000548883.5	12q23.2	.	.	Score=1481;Name="1116687:L2a(LINE)"	.	.	.	.	.	.	.	.	.	.	.	.	.	.	.	.	.	.	.	.	.	.	.	.	.	.	.	.	.	.	.	.
chr12	103533027	.	G	C	.	PASS	.	intergenic	NR_135004,NR_110103	dist=35332;dist=14767	.	.	.	12q23.3	.	.	.	.	.	.	.	.	.	.	.	.	.	.	.	.	.	.	.	.	.	.	.	.	.	.	.	.	.	.	.	.	.	.	.
chr12	104308537	.	G	A	.	PASS	TXNRD1	intronic	NM_001093771,NM_001261445,NM_001261446,NM_003330,NM_182729,NM_182742,NM_182743	.	.	.	ENST00000525566.5,ENST00000503506.6,ENST00000429002.6,ENST00000529546.5,ENST00000397736.6,ENST00000388854.7,ENST00000354940.10,ENST00000526390.5,ENST00000526691.5,ENST00000524698.5	12q23.3	.	.	Score=1618;Name="1118835:Charlie1b(DNA)"	.	.	.	.	.	.	.	.	.	.	.	.	.	.	.	.	.	.	.	.	.	.	.	.	.	.	.	.	.	.	.	.
chr12	104424019	.	A	G	.	PASS	.	intergenic	NM_001093771,NM_001173982	dist=73712;dist=32895	.	.	.	12q23.3	.	.	Score=410;Name="1119100:L2c(LINE)"	.	.	.	.	.	.	.	.	.	.	.	.	.	.	.	.	.	.	.	.	.	.	.	.	.	.	.	.	.	.	.	.
chr12	104430891	.	T	C	.	PASS	.	intergenic	NM_001093771,NM_001173982	dist=80584;dist=26023	.	.	.	12q23.3	.	.	Score=3187;Name="1119113:Charlie6(DNA)"	.	.	.	.	.	.	.	.	.	.	.	.	.	.	.	.	.	.	.	.	.	.	.	.	.	.	.	.	.	.	.	.
chr12	104869321	.	G	A	.	PASS	SLC41A2	intronic	NM_032148	.	.	.	ENST00000258538.7	12q23.3	.	.	.	.	.	.	.	.	.	.	.	.	.	.	.	.	.	.	.	.	.	.	.	.	.	.	.	.	.	.	.	.	.	.	.
chr12	105038260	rs76971370	T	A	.	PASS	ALDH1L2	intronic	NM_001034173	.	.	.	ENST00000258494.13	12q23.3	.	.	Score=69;Name="1120458:(CA)n(Simple_repeat)"	rs76971370	.	.	.	.	.	.	.	0.4157	0.1452	0.159	0.4372	0.2089	0.288339	.	.	.	.	.	.	.	.	.	.	.	.	.	.	.	.	.	.
chr12	105814091	.	T	C	.	PASS	.	intergenic	NR_110108,NM_014840	dist=70028;dist=249256	.	.	.	12q23.3	.	.	Score=2422;Name="1122065:AluSq2(SINE)"	.	.	.	.	.	.	.	.	.	.	.	.	.	.	.	.	.	.	.	.	.	.	.	.	.	.	.	.	.	.	.	.
chr12	106044440	.	G	T	.	PASS	.	intergenic	NR_110108,NM_014840	dist=300377;dist=18907	.	.	.	12q23.3	.	.	Score=27;Name="1122575:(TA)n(Simple_repeat)"	.	.	.	.	.	.	.	.	.	.	.	.	.	.	.	.	.	.	.	.	.	.	.	.	.	.	.	.	.	.	.	.
chr12	106403337	.	T	A	.	PASS	POLR3B	intronic	NM_001160708,NM_018082	.	.	.	ENST00000539066.5,ENST00000228347.8	12q23.3	.	.	Score=25014;Name="1123368:L1PA4(LINE)"	.	.	.	.	.	.	.	.	.	.	.	.	.	.	.	.	.	.	.	.	.	.	.	.	.	.	.	.	.	.	.	.
chr12	106582065	.	A	C	.	PASS	LOC100287944	ncRNA_intronic	NR_040246	.	.	.	ENST00000551505.4,ENST00000549203.2	12q23.3	.	.	.	.	.	.	.	.	.	.	.	.	.	.	.	.	.	.	.	.	.	.	.	.	.	.	.	.	.	.	.	.	.	.	.
chr12	107381096	.	A	C	.	PASS	BTBD11	intronic	NM_001018072,NM_001347943,NM_001347944	.	.	.	ENST00000490090.6,ENST00000420571.6,ENST00000280758.9	12q23.3	.	.	Score=564;Name="1125564:L2a(LINE)"	.	.	.	.	.	.	.	.	.	.	.	.	.	.	.	.	.	.	.	.	.	.	.	.	.	.	.	.	.	.	.	.
chr12	107535523	.	A	C	.	PASS	BTBD11	intronic	NM_001018072,NM_001347943,NM_001347944	.	.	.	ENST00000420571.6,ENST00000280758.9,ENST00000490090.6	12q23.3	.	.	Score=14199;Name="1125988:L1MA5(LINE)"	.	.	.	.	.	.	.	.	.	.	.	.	.	.	.	.	.	.	.	.	.	.	.	.	.	.	.	.	.	.	.	.
chr12	108491057	.	C	G	.	PASS	.	intergenic	NR_120483,NM_007076	dist=17368;dist=24217	.	.	ENST00000502160.6	12q23.3	.	.	.	.	.	.	.	.	.	.	.	.	.	.	.	.	.	.	.	.	.	.	.	.	.	.	.	.	.	.	.	.	.	.	.
chr12	108849382	.	A	C	.	PASS	SSH1	intronic	NM_001161330,NM_018984	.	.	.	ENST00000326495.9,ENST00000551165.5	12q24.11	.	.	Score=1969;Name="1129137:AluJo(SINE)"	.	.	.	.	.	.	.	.	.	.	.	.	.	.	.	.	.	.	.	.	.	.	.	.	.	.	.	.	.	.	.	.
chr12	109524522	.	T	G	.	PASS	UBE3B	intronic	NM_130466,NM_183415	.	.	.	ENST00000434735.6,ENST00000342494.7	12q24.11	.	.	.	.	.	.	.	.	.	.	.	.	.	.	.	.	.	.	.	.	.	.	.	.	.	.	.	.	.	.	.	.	.	.	.
chr12	109833456	.	T	G	.	PASS	.	upstream;downstream	NM_021625;NR_039718	.	.	.	.	12q24.11	.	.	Score=25;Name="1131794:(CCGCCCG)n(Simple_repeat)"	.	.	.	.	.	.	.	.	.	.	.	.	.	.	.	.	.	.	.	.	.	.	.	.	.	.	.	.	.	.	.	.
chr12	110079968	.	G	C	.	PASS	.	intergenic	NM_207435,NM_031473	dist=12273;dist=44367	.	.	.	12q24.11	.	.	Score=290;Name="1132424:MLT1O(LTR)"	.	.	.	.	.	.	.	.	.	.	.	.	.	.	.	.	.	.	.	.	.	.	.	.	.	.	.	.	.	.	.	.
chr12	110777876	.	G	A	.	PASS	.	intergenic	NM_002710,NM_001286243	dist=34898;dist=69084	.	.	.	12q24.11	.	.	Score=2338;Name="1134261:AluSx1(SINE)"	.	.	.	.	.	.	.	.	.	.	.	.	.	.	.	.	.	.	.	.	.	.	.	.	.	.	.	.	.	.	.	.
chr12	111152993	.	T	A	.	PASS	CUX2	intronic	NM_015267	.	.	.	ENST00000261726.10	12q24.11	.	.	.	.	.	.	.	.	.	.	.	.	.	.	.	.	.	.	.	.	.	.	.	.	.	.	.	.	.	.	.	.	.	.	.
chr12	111310301	.	T	G	.	PASS	CUX2	exonic	NM_015267	.	missense SNV	CUX2:NM_015267:exon15:c.T1519G:p.F507V	ENST00000261726.10	12q24.12	.	.	.	.	.	.	.	.	.	.	.	.	.	.	.	.	.	.	.	.	.	.	.	.	.	.	.	.	.	.	.	.	.	.	.
chr12	111409562	.	A	C	.	PASS	SH2B3	intronic	NM_005475	.	.	.	ENST00000341259.6	12q24.12	.	.	.	.	.	.	.	.	.	.	.	.	.	.	.	.	.	.	.	.	.	.	.	.	.	.	.	.	.	.	.	.	.	.	.
chr12	111409688	.	T	G	.	PASS	SH2B3	intronic	NM_005475	.	.	.	ENST00000341259.6	12q24.12	.	.	.	.	.	.	.	.	.	.	.	.	.	.	.	.	.	.	.	.	.	.	.	.	.	.	.	.	.	.	.	.	.	.	.
chr12	111598766	.	T	G	.	PASS	ATXN2	intronic	NM_001310121,NM_001310123,NM_002973	.	.	.	ENST00000377617.7,ENST00000535949.5,ENST00000542287.6,ENST00000550104.5,ENST00000389153.8,ENST00000608853.5,ENST00000616825.4	12q24.12	.	.	.	.	.	.	.	.	.	.	.	.	.	.	.	.	.	.	.	.	.	.	.	.	.	.	.	.	.	.	.	.	.	.	.
chr12	112117509	.	C	A	.	PASS	.	intergenic	NM_024953,NM_006700	dist=8678;dist=8036	.	.	.	12q24.13	.	.	Score=767;Name="1137868:AluJb(SINE)"	.	.	.	.	.	.	.	.	.	.	.	.	.	.	.	.	.	.	.	.	.	.	.	.	.	.	.	.	.	.	.	.
chr12	112567044	.	T	G	.	PASS	.	intergenic	NM_002834,NM_001347952	dist=57126;dist=8053	.	.	.	12q24.13	.	.	Score=2109;Name="1139084:THE1D(LTR)"	.	.	.	.	.	.	.	.	.	.	.	.	.	.	.	.	.	.	.	.	.	.	.	.	.	.	.	.	.	.	.	.
chr12	112813966	.	G	A	.	PASS	RPH3A	intronic	NM_001143854,NM_001347952,NM_001347953,NM_001347954,NM_001347955,NM_014954	.	.	.	ENST00000415485.7,ENST00000548866.5,ENST00000543106.6,ENST00000389385.8,ENST00000551052.5	12q24.13	.	.	Score=53;Name="1139786:(TG)n(Simple_repeat)"	.	.	.	.	.	.	.	.	.	.	.	.	.	.	.	.	.	.	.	.	.	.	.	.	.	.	.	.	.	.	.	.
chr12	112871142	.	T	G	.	PASS	RPH3A	intronic	NM_001143854,NM_001347952,NM_001347953,NM_001347954,NM_001347955,NM_014954	.	.	.	ENST00000389385.8,ENST00000551052.5,ENST00000415485.7,ENST00000543106.6,ENST00000548866.5	12q24.13	.	.	.	.	.	.	.	.	.	.	.	.	.	.	.	.	.	.	.	.	.	.	.	.	.	.	.	.	.	.	.	.	.	.	.
chr12	113098096	.	G	A	.	PASS	.	downstream	NM_001193520,NM_001193521,NM_001301202,NM_004416,NM_004658	.	.	.	.	12q24.13	.	.	.	.	.	.	.	.	.	.	.	.	.	.	.	.	.	.	.	.	.	.	.	.	.	.	.	.	.	.	.	.	.	.	.
chr12	113130687	.	T	G	.	PASS	RASAL1	intronic	NM_001193520,NM_001193521,NM_001301202,NM_004658	.	.	.	ENST00000261729.9,ENST00000446861.7,ENST00000546530.5,ENST00000548055.1	12q24.13	.	.	.	.	.	.	.	.	.	.	.	.	.	.	.	.	.	.	.	.	.	.	.	.	.	.	.	.	.	.	.	.	.	.	.
chr12	113159301	.	A	C	.	PASS	DDX54	intronic	NM_001111322,NM_024072	.	.	.	ENST00000314045.11,ENST00000306014.9	12q24.13	.	.	Score=578;Name="1140681:MIR(SINE)"	.	.	.	.	.	.	.	.	.	.	.	.	.	.	.	.	.	.	.	.	.	.	.	.	.	.	.	.	.	.	.	.
chr12	113183296	.	T	G	.	PASS	DDX54	intronic	NM_001111322,NM_024072	.	.	.	ENST00000306014.9,ENST00000314045.11	12q24.13	.	.	Score=445;Name="1140752:MIR(SINE)"	.	.	.	.	.	.	.	.	.	.	.	.	.	.	.	.	.	.	.	.	.	.	.	.	.	.	.	.	.	.	.	.
chr12	113323775	.	T	C	.	PASS	SLC8B1	intronic	NM_001330466,NM_024959	.	.	.	ENST00000202831.7,ENST00000552014.5,ENST00000546737.5	12q24.13	.	.	.	.	.	.	.	.	.	.	.	.	.	.	.	.	.	.	.	.	.	.	.	.	.	.	.	.	.	.	.	.	.	.	.
chr12	113361341	rs199790493	G	T	.	PASS	PLBD2	intronic	NM_001159727,NM_173542	.	.	.	ENST00000545182.6,ENST00000280800.4	12q24.13	.	.	Score=1826;Name="1141222:AluJo(SINE)"	rs199790493	.	.	.	.	.	.	.	.	.	.	.	.	.	.	.	.	.	.	.	.	.	.	.	.	.	.	.	.	.	.	.
chr12	113363082	.	T	G	.	PASS	PLBD2	intronic	NM_001159727,NM_173542	.	.	.	ENST00000545182.6,ENST00000280800.4	12q24.13	.	.	Score=2184;Name="1141225:AluSx(SINE)"	.	.	.	.	.	.	.	.	.	.	.	.	.	.	.	.	.	.	.	.	.	.	.	.	.	.	.	.	.	.	.	.
chr12	113780066	.	A	C	.	PASS	.	intergenic	NR_110026,NM_001146699	dist=6383;dist=36672	.	.	.	12q24.13	.	.	.	.	.	.	.	.	.	.	.	.	.	.	.	.	.	.	.	.	.	.	.	.	.	.	.	.	.	.	.	.	.	.	.
chr12	113872728	.	G	A	.	PASS	RBM19	intronic	NM_001146698,NM_001146699,NM_016196	.	.	.	ENST00000545145.6,ENST00000261741.9,ENST00000392561.7	12q24.13	.	.	Score=6654;Name="1142664:SVA_F(Retroposon)"	.	.	.	.	.	.	.	.	.	.	.	.	.	.	.	.	.	.	.	.	.	.	.	.	.	.	.	.	.	.	.	.
chr12	114001416	.	A	C	.	PASS	.	intergenic	NM_001146699,NR_146536	dist=35045;dist=237555	.	.	.	12q24.21	.	.	.	.	.	.	.	.	.	.	.	.	.	.	.	.	.	.	.	.	.	.	.	.	.	.	.	.	.	.	.	.	.	.	.
chr12	114011542	.	A	G	.	PASS	.	intergenic	NM_001146699,NR_146536	dist=45171;dist=227429	.	.	.	12q24.21	.	.	Score=1200;Name="1143023:MLT1H1(LTR)"	.	.	.	.	.	.	.	.	.	.	.	.	.	.	.	.	.	.	.	.	.	.	.	.	.	.	.	.	.	.	.	.
chr12	114150603	.	G	T	.	PASS	.	intergenic	NM_001146699,NR_146536	dist=184232;dist=88368	.	.	.	12q24.21	.	.	.	.	.	.	.	.	.	.	.	.	.	.	.	.	.	.	.	.	.	.	.	.	.	.	.	.	.	.	.	.	.	.	.
chr12	114212432	.	C	G	.	PASS	.	intergenic	NM_001146699,NR_146536	dist=246061;dist=26539	.	.	.	12q24.21	.	.	Score=947;Name="1143304:MLT1I(LTR)"	.	.	.	.	.	.	.	.	.	.	.	.	.	.	.	.	.	.	.	.	.	.	.	.	.	.	.	.	.	.	.	.
chr12	115379031	.	G	C	.	PASS	.	intergenic	NM_005996,NM_015335	dist=694867;dist=579545	.	.	.	12q24.21	.	.	.	.	.	.	.	.	.	.	.	.	.	.	.	.	.	.	.	.	.	.	.	.	.	.	.	.	.	.	.	.	.	.	.
chr12	116656126	.	A	C	.	PASS	.	intergenic	NM_001085481,NM_024738	dist=79506;dist=57194	.	.	.	12q24.22	.	.	Score=2000;Name="1149470:AluSz(SINE)"	.	.	.	.	.	.	.	.	.	.	.	.	.	.	.	.	.	.	.	.	.	.	.	.	.	.	.	.	.	.	.	.
chr12	116858148	.	C	A	.	PASS	.	intergenic	NM_032814,NM_003806	dist=4517;dist=2272	.	.	ENST00000257572.5	12q24.22	.	.	.	.	.	.	.	.	.	.	.	.	.	.	.	.	.	.	.	.	.	.	.	.	.	.	.	.	.	.	.	.	.	.	.
chr12	117652894	.	A	G	.	PASS	KSR2	intronic	NM_173598	.	.	.	ENST00000339824.6,ENST00000425217.5	12q24.22	.	.	Score=45626;Name="1151990:HERVL-int(LTR)"	.	.	.	.	.	.	.	.	.	.	.	.	.	.	.	.	.	.	.	.	.	.	.	.	.	.	.	.	.	.	.	.
chr12	117783553	.	C	G	.	PASS	KSR2	intronic	NM_173598	.	.	.	ENST00000425217.5,ENST00000339824.6	12q24.23	.	.	Score=706;Name="1152302:L1MEf(LINE)"	.	.	.	.	.	.	.	.	.	.	.	.	.	.	.	.	.	.	.	.	.	.	.	.	.	.	.	.	.	.	.	.
chr12	117867053	.	A	C	.	PASS	KSR2	intronic	NM_173598	.	.	.	ENST00000425217.5,ENST00000339824.6	12q24.23	.	.	Score=2007;Name="1152519:AluJb(SINE)"	.	.	.	.	.	.	.	.	.	.	.	.	.	.	.	.	.	.	.	.	.	.	.	.	.	.	.	.	.	.	.	.
chr12	118356410	.	A	C	.	PASS	TAOK3	intronic	NM_001346487,NM_001346488,NM_001346489,NM_001346490,NM_001346491,NM_001346492,NM_001346493,NM_016281	.	.	.	ENST00000419821.6,ENST00000392533.7	12q24.23	.	.	Score=2242;Name="1153900:AluSz(SINE)"	.	.	.	.	.	.	.	.	.	.	.	.	.	.	.	.	.	.	.	.	.	.	.	.	.	.	.	.	.	.	.	.
chr12	118498993	.	A	C	.	PASS	.	intergenic	NM_022491,NR_134998	dist=80958;dist=259761	.	.	.	12q24.23	.	.	Score=2129;Name="1154216:AluSx(SINE)"	.	.	.	.	.	.	.	.	.	.	.	.	.	.	.	.	.	.	.	.	.	.	.	.	.	.	.	.	.	.	.	.
chr12	118672999	.	T	G	.	PASS	.	intergenic	NM_022491,NR_134998	dist=254964;dist=85755	.	.	.	12q24.23	.	.	Score=25225;Name="1154708:L1PA6(LINE)"	.	.	.	.	.	.	.	.	.	.	.	.	.	.	.	.	.	.	.	.	.	.	.	.	.	.	.	.	.	.	.	.
chr12	119058327	.	A	G	.	PASS	SRRM4	intronic	NM_194286	.	.	.	ENST00000537730.1,ENST00000267260.4	12q24.23	.	.	Score=427;Name="1155663:MIR(SINE)"	.	.	.	.	.	.	.	.	.	.	.	.	.	.	.	.	.	.	.	.	.	.	.	.	.	.	.	.	.	.	.	.
chr12	119144968	.	C	A	.	PASS	SRRM4	intronic	NM_194286	.	.	.	ENST00000267260.4	12q24.23	.	.	.	.	.	.	.	.	.	.	.	.	.	.	.	.	.	.	.	.	.	.	.	.	.	.	.	.	.	.	.	.	.	.	.
chr12	119191581	.	A	G	.	PASS	HSPB8	intronic	NM_014365	.	.	.	ENST00000281938.6	12q24.23	.	.	Score=20;Name="1155987:(A)n(Simple_repeat)"	.	.	.	.	.	.	.	.	.	.	.	.	.	.	.	.	.	.	.	.	.	.	.	.	.	.	.	.	.	.	.	.
chr12	119545983	.	T	G	.	PASS	.	intergenic	NM_178499,NM_001136534	dist=4936;dist=47476	.	.	ENST00000537366.5,ENST00000509470.2	12q24.23	.	.	Score=363;Name="1156958:L1ME4b(LINE)"	.	.	.	.	.	.	.	.	.	.	.	.	.	.	.	.	.	.	.	.	.	.	.	.	.	.	.	.	.	.	.	.
chr12	119919751	.	G	C	.	PASS	.	intergenic	NM_007174,NM_207311	dist=42460;dist=70093	.	.	.	12q24.23	.	.	Score=340;Name="1157904:(GGGAGA)n(Simple_repeat)"	.	.	.	.	.	.	.	.	.	.	.	.	.	.	.	.	.	.	.	.	.	.	.	.	.	.	.	.	.	.	.	.
chr12	120451766	.	A	C	.	PASS	GATC	intronic	NM_176818	.	.	.	ENST00000551765.5,ENST00000551806.1	12q24.31	.	.	Score=2372;Name="1159417:AluSx(SINE)"	.	.	.	.	.	.	.	.	.	.	.	.	.	.	.	.	.	.	.	.	.	.	.	.	.	.	.	.	.	.	.	.
chr12	120600363	.	T	G	.	PASS	.	intergenic	NM_198202,NM_001033677	dist=18965;dist=40256	.	.	.	12q24.31	.	.	.	.	.	.	.	.	.	.	.	.	.	.	.	.	.	.	.	.	.	.	.	.	.	.	.	.	.	.	.	.	.	.	.
chr12	120987613	rs893350404	T	C	.	PASS	HNF1A	intronic	NM_000545,NM_001306179	.	.	.	ENST00000544413.2,ENST00000400024.6,ENST00000617366.4,ENST00000543427.5,ENST00000541395.5,ENST00000615446.4,ENST00000257555.10	12q24.31	.	.	Score=30;Name="1160841:(AT)n(Simple_repeat)"	rs893350404	.	.	.	.	.	.	.	.	.	.	.	.	.	.	.	.	.	.	.	.	.	.	.	.	.	.	.	.	.	.	.
chr12	121443972	.	A	C	.	PASS	KDM2B	intronic	NM_001005366,NM_032590	.	.	.	ENST00000542973.5,ENST00000536437.5,ENST00000377069.8,ENST00000377071.8,ENST00000611216.4	12q24.31	.	.	.	.	.	.	.	.	.	.	.	.	.	.	.	.	.	.	.	.	.	.	.	.	.	.	.	.	.	.	.	.	.	.	.
chr12	122166653	.	G	T	.	PASS	.	intergenic	NM_014938,NM_152759	dist=19306;dist=1066	.	.	.	12q24.31	.	.	Score=534;Name="1164288:MER45A(DNA)"	.	.	.	.	.	.	.	.	.	.	.	.	.	.	.	.	.	.	.	.	.	.	.	.	.	.	.	.	.	.	.	.
chr12	122296884	.	C	A	.	PASS	CLIP1	intronic	NM_001247997,NM_002956,NM_198240	.	.	.	ENST00000537178.5,ENST00000545889.5,ENST00000620786.4,ENST00000358808.6,ENST00000361654.8,ENST00000540338.5,ENST00000302528.11	12q24.31	.	.	Score=558;Name="1164606:L1MC5(LINE)"	.	.	.	.	.	.	.	.	.	.	.	.	.	.	.	.	.	.	.	.	.	.	.	.	.	.	.	.	.	.	.	.
chr12	122431211	rs116075200	T	A	.	PASS	.	intergenic	NM_198240,NM_017612	dist=8642;dist=40388	.	.	.	12q24.31	.	.	Score=516;Name="1164933:AluJr(SINE)"	rs116075200	.	.	.	.	.	.	.	0.001	0.001	0.001	0.1301	0.0086	0.0361422	.	.	.	.	.	.	.	.	.	.	.	.	.	.	.	.	.	.
chr12	122729095	.	A	C	.	PASS	HCAR1	UTR3	NM_032554	NM_032554:c.*204T>G	.	.	ENST00000432564.2	12q24.31	.	.	.	.	.	.	.	.	.	.	.	.	.	.	.	.	.	.	.	.	.	.	.	.	.	.	.	.	.	.	.	.	.	.	.
chr12	122940220	.	T	G	.	PASS	ABCB9	exonic	NM_001243013,NM_001243014,NM_019624,NM_019625,NM_203444	.	missense SNV	ABCB9:NM_001243013:exon8:c.A1445C:p.K482T,ABCB9:NM_019624:exon8:c.A1505C:p.K502T,ABCB9:NM_001243014:exon9:c.A1634C:p.K545T,ABCB9:NM_019625:exon9:c.A1634C:p.K545T,ABCB9:NM_203444:exon9:c.A1634C:p.K545T	ENST00000442833.6,ENST00000540285.5,ENST00000392439.7,ENST00000542678.5,ENST00000344275.11,ENST00000346530.9,ENST00000442028.6,ENST00000280560.12	12q24.31	.	.	.	.	.	.	.	.	.	.	.	.	.	.	.	.	.	.	.	.	.	.	.	.	.	.	.	.	.	.	.	.	.	.	.
chr12	123449250	.	A	G	.	PASS	.	intergenic	NM_145058,NM_022717	dist=12517;dist=8854	.	.	.	12q24.31	.	.	Score=844;Name="1167590:LTR16B1(LTR)"	.	.	.	.	.	.	.	.	.	.	.	.	.	.	.	.	.	.	.	.	.	.	.	.	.	.	.	.	.	.	.	.
chr12	123499751	.	T	G	.	PASS	RILPL1	intronic	NM_001319243,NM_001319244,NM_001319302,NM_178314	.	.	.	ENST00000340724.6,ENST00000376874.8	12q24.31	.	.	Score=248;Name="1167730:L2b(LINE)"	.	.	.	.	.	.	.	.	.	.	.	.	.	.	.	.	.	.	.	.	.	.	.	.	.	.	.	.	.	.	.	.
chr12	123560788	.	C	A	.	PASS	.	intergenic	NR_037470,NR_110049	dist=24254;dist=20278	.	.	.	12q24.31	.	.	Score=2343;Name="1167922:AluSz(SINE)"	.	.	.	.	.	.	.	.	.	.	.	.	.	.	.	.	.	.	.	.	.	.	.	.	.	.	.	.	.	.	.	.
chr12	123796364	.	A	C	.	PASS	DNAH10	intronic	NM_207437	.	.	.	ENST00000614082.1,ENST00000409039.7	12q24.31	.	.	Score=2073;Name="1168581:AluSx1(SINE)"	.	.	.	.	.	.	.	.	.	.	.	.	.	.	.	.	.	.	.	.	.	.	.	.	.	.	.	.	.	.	.	.
chr12	123832663	.	T	A	.	PASS	DNAH10	intronic	NM_207437	.	.	.	ENST00000409039.7	12q24.31	.	.	.	.	.	.	.	.	.	.	.	.	.	.	.	.	.	.	.	.	.	.	.	.	.	.	.	.	.	.	.	.	.	.	.
chr12	124371504	.	A	G	.	PASS	NCOR2	intronic	NM_001077261,NM_001206654,NM_006312	.	.	.	ENST00000404621.5,ENST00000404121.6,ENST00000429285.6,ENST00000405201.5,ENST00000356219.7	12q24.31	.	.	Score=859;Name="1169751:MLT1C(LTR)"	.	.	.	.	.	.	.	.	.	.	.	.	.	.	.	.	.	.	.	.	.	.	.	.	.	.	.	.	.	.	.	.
chr12	124796821	rs892058690	T	G	.	PASS	SCARB1	intronic	NM_001082959,NM_005505	.	.	.	ENST00000261693.10,ENST00000339570.9,ENST00000415380.6,ENST00000544327.1,ENST00000546215.5	12q24.31	.	.	.	rs892058690	.	.	.	.	.	.	.	.	.	.	.	.	.	.	.	.	.	.	.	.	.	.	.	.	.	.	.	.	.	.	.
chr12	124889667	.	A	C	.	PASS	.	intergenic	NM_001082959,NM_021009	dist=25694;dist=21978	.	.	.	12q24.31	.	.	Score=2414;Name="1171053:AluSx1(SINE)"	.	.	.	.	.	.	.	.	.	.	.	.	.	.	.	.	.	.	.	.	.	.	.	.	.	.	.	.	.	.	.	.
chr12	124889668	.	A	C	.	PASS	.	intergenic	NM_001082959,NM_021009	dist=25695;dist=21977	.	.	.	12q24.31	.	.	Score=2414;Name="1171053:AluSx1(SINE)"	.	.	.	.	.	.	.	.	.	.	.	.	.	.	.	.	.	.	.	.	.	.	.	.	.	.	.	.	.	.	.	.
chr12	125334998	.	T	G	.	PASS	TMEM132B	intronic	NM_052907	.	.	.	ENST00000299308.7	12q24.31	.	.	.	.	.	.	.	.	.	.	.	.	.	.	.	.	.	.	.	.	.	.	.	.	.	.	.	.	.	.	.	.	.	.	.
chr12	125372144	.	G	C	.	PASS	TMEM132B	intronic	NM_052907	.	.	.	ENST00000299308.7	12q24.31	.	.	.	.	.	.	.	.	.	.	.	.	.	.	.	.	.	.	.	.	.	.	.	.	.	.	.	.	.	.	.	.	.	.	.
chr12	125784463	.	A	T	.	PASS	.	intergenic	NM_052907,NR_034132	dist=122086;dist=174223	.	.	.	12q24.32	.	.	Score=2392;Name="1173052:AluSx(SINE)"	.	.	.	.	.	.	.	.	.	.	.	.	.	.	.	.	.	.	.	.	.	.	.	.	.	.	.	.	.	.	.	.
chr12	126914089	.	A	C	.	PASS	.	intergenic	NR_033970,NR_104646	dist=39399;dist=1139	.	.	.	12q24.32	.	.	Score=3293;Name="1175248:Charlie1(DNA)"	.	.	.	.	.	.	.	.	.	.	.	.	.	.	.	.	.	.	.	.	.	.	.	.	.	.	.	.	.	.	.	.
chr12	126937904	.	C	G	.	PASS	LOC101927592	ncRNA_intronic	NR_104646	.	.	.	ENST00000512624.6	12q24.32	.	.	.	.	.	.	.	.	.	.	.	.	.	.	.	.	.	.	.	.	.	.	.	.	.	.	.	.	.	.	.	.	.	.	.
chr12	127037287	rs202217029	G	A	.	PASS	LOC101927592	ncRNA_intronic	NR_104646	.	.	.	ENST00000512624.6	12q24.32	.	.	Score=47;Name="1175496:(AC)n(Simple_repeat)"	rs202217029	.	.	.	.	.	.	.	.	.	.	.	.	.	.	.	.	.	.	.	.	.	.	.	.	.	.	.	.	.	.	.
chr12	127279617	.	G	C	.	PASS	.	ncRNA_intronic	NR_146537	.	.	.	ENST00000536330.1	12q24.32	.	.	.	.	.	.	.	.	.	.	.	.	.	.	.	.	.	.	.	.	.	.	.	.	.	.	.	.	.	.	.	.	.	.	.
chr12	127503760	.	A	G	.	PASS	.	intergenic	NR_110057,NR_120451	dist=163688;dist=127509	.	.	.	12q24.32	.	.	.	.	.	.	.	.	.	.	.	.	.	.	.	.	.	.	.	.	.	.	.	.	.	.	.	.	.	.	.	.	.	.	.
chr12	127575471	.	C	T	.	PASS	.	intergenic	NR_110057,NR_120451	dist=235399;dist=55798	.	.	.	12q24.32	.	.	Score=922;Name="1176545:MLT1D(LTR)"	.	.	.	.	.	.	.	.	.	.	.	.	.	.	.	.	.	.	.	.	.	.	.	.	.	.	.	.	.	.	.	.
chr12	127866550	.	G	C	.	PASS	.	intergenic	NR_134995,NR_033987	dist=210962;dist=15067	.	.	.	12q24.32	.	.	Score=26201;Name="1177127:L1PA3(LINE)"	.	.	.	.	.	.	.	.	.	.	.	.	.	.	.	.	.	.	.	.	.	.	.	.	.	.	.	.	.	.	.	.
chr12	127874525	.	C	T	.	PASS	.	intergenic	NR_134995,NR_033987	dist=218937;dist=7092	.	.	.	12q24.32	.	.	Score=2267;Name="1177133:AluSz(SINE)"	.	.	.	.	.	.	.	.	.	.	.	.	.	.	.	.	.	.	.	.	.	.	.	.	.	.	.	.	.	.	.	.
chr12	127878927	.	T	A	.	PASS	.	intergenic	NR_134995,NR_033987	dist=223339;dist=2690	.	.	.	12q24.32	.	.	.	.	.	.	.	.	.	.	.	.	.	.	.	.	.	.	.	.	.	.	.	.	.	.	.	.	.	.	.	.	.	.	.
chr12	128000083	rs983404859	C	G	.	PASS	.	intergenic	NR_126452,NR_131985	dist=16192;dist=23705	.	.	.	12q24.32	.	.	.	rs983404859	.	.	.	.	.	.	.	.	.	.	.	.	.	.	.	.	.	.	.	.	.	.	.	.	.	.	.	.	.	.	.
chr12	128426063	.	T	C	.	PASS	TMEM132C	intronic	NM_001136103	.	.	.	ENST00000435159.2	12q24.32	.	.	.	.	.	.	.	.	.	.	.	.	.	.	.	.	.	.	.	.	.	.	.	.	.	.	.	.	.	.	.	.	.	.	.
chr12	128608879	.	C	G	.	PASS	TMEM132C	intronic	NM_001136103	.	.	.	ENST00000435159.2	12q24.32	.	.	.	.	.	.	.	.	.	.	.	.	.	.	.	.	.	.	.	.	.	.	.	.	.	.	.	.	.	.	.	.	.	.	.
chr12	129051733	.	T	A	.	PASS	.	intergenic	NM_144669,NM_133448	dist=66769;dist=19993	.	.	.	12q24.33	.	.	.	.	.	.	.	.	.	.	.	.	.	.	.	.	.	.	.	.	.	.	.	.	.	.	.	.	.	.	.	.	.	.	.
chr12	129100585	.	G	C	.	PASS	TMEM132D	intronic	NM_133448	.	.	.	ENST00000619366.1,ENST00000422113.6	12q24.33	.	.	.	.	.	.	.	.	.	.	.	.	.	.	.	.	.	.	.	.	.	.	.	.	.	.	.	.	.	.	.	.	.	.	.
chr12	129147066	.	A	G	.	PASS	TMEM132D	intronic	NM_133448	.	.	.	ENST00000619366.1,ENST00000422113.6	12q24.33	.	.	Score=390;Name="1179882:L1MC4(LINE)"	.	.	.	.	.	.	.	.	.	.	.	.	.	.	.	.	.	.	.	.	.	.	.	.	.	.	.	.	.	.	.	.
chr12	129154911	.	A	T	.	PASS	TMEM132D	intronic	NM_133448	.	.	.	ENST00000422113.6,ENST00000619366.1	12q24.33	.	.	Score=316;Name="1179895:Charlie25(DNA)"	.	.	.	.	.	.	.	.	.	.	.	.	.	.	.	.	.	.	.	.	.	.	.	.	.	.	.	.	.	.	.	.
chr12	129265086	.	A	C	.	PASS	TMEM132D	intronic	NM_133448	.	.	.	ENST00000619366.1,ENST00000422113.6	12q24.33	.	.	Score=840;Name="1180129:MLT1K(LTR)"	.	.	.	.	.	.	.	.	.	.	.	.	.	.	.	.	.	.	.	.	.	.	.	.	.	.	.	.	.	.	.	.
chr12	129429144	rs11060338	A	C	.	PASS	TMEM132D	intronic	NM_133448	.	.	.	ENST00000422113.6,ENST00000619366.1	12q24.33	.	.	.	rs11060338	.	.	.	.	.	.	.	.	.	.	.	.	.	.	.	.	.	.	.	.	.	.	.	.	.	.	.	.	.	.	.
chr12	129593212	.	A	G	.	PASS	TMEM132D	intronic	NM_133448	.	.	.	ENST00000422113.6,ENST00000619366.1	12q24.33	.	.	.	.	.	.	.	.	.	.	.	.	.	.	.	.	.	.	.	.	.	.	.	.	.	.	.	.	.	.	.	.	.	.	.
chr12	129610997	.	C	G	.	PASS	TMEM132D	intronic	NM_133448	.	.	.	ENST00000422113.6,ENST00000619366.1	12q24.33	.	.	.	.	.	.	.	.	.	.	.	.	.	.	.	.	.	.	.	.	.	.	.	.	.	.	.	.	.	.	.	.	.	.	.
chr12	130011506	.	G	T	.	PASS	.	intergenic	NM_133448,NR_024457	dist=107839;dist=22306	.	.	.	12q24.33	.	.	.	.	.	.	.	.	.	.	.	.	.	.	.	.	.	.	.	.	.	.	.	.	.	.	.	.	.	.	.	.	.	.	.
chr12	130238682	.	A	T	.	PASS	.	intergenic	NM_007197,NM_004764	dist=72942;dist=99206	.	.	.	12q24.33	.	.	Score=5692;Name="1182070:L1MC3(LINE)"	.	.	.	.	.	.	.	.	.	.	.	.	.	.	.	.	.	.	.	.	.	.	.	.	.	.	.	.	.	.	.	.
chr12	130238809	.	G	T	.	PASS	.	intergenic	NM_007197,NM_004764	dist=73069;dist=99079	.	.	.	12q24.33	.	.	Score=5692;Name="1182070:L1MC3(LINE)"	.	.	.	.	.	.	.	.	.	.	.	.	.	.	.	.	.	.	.	.	.	.	.	.	.	.	.	.	.	.	.	.
chr12	130337562	.	T	G	.	PASS	.	upstream	NM_001190971,NM_004764	.	.	.	.	12q24.33	.	.	.	.	.	.	.	.	.	.	.	.	.	.	.	.	.	.	.	.	.	.	.	.	.	.	.	.	.	.	.	.	.	.	.
chr12	130338816	.	A	C	.	PASS	PIWIL1	intronic	NM_001190971,NM_004764	.	.	.	ENST00000245255.7	12q24.33	.	.	.	.	.	.	.	.	.	.	.	.	.	.	.	.	.	.	.	.	.	.	.	.	.	.	.	.	.	.	.	.	.	.	.
chr12	130406419	.	T	G	.	PASS	RIMBP2	intronic	NM_001351226,NM_001351227,NM_001351228,NM_001351229,NM_001351230,NM_001351231,NM_015347	.	.	.	ENST00000261655.8	12q24.33	.	.	.	.	.	.	.	.	.	.	.	.	.	.	.	.	.	.	.	.	.	.	.	.	.	.	.	.	.	.	.	.	.	.	.
chr12	130745423	.	C	A	.	PASS	.	intergenic	NM_001351226,NM_001351049	dist=29118;dist=44178	.	.	.	12q24.33	.	.	.	.	.	.	.	.	.	.	.	.	.	.	.	.	.	.	.	.	.	.	.	.	.	.	.	.	.	.	.	.	.	.	.
chr12	132351568	.	T	G	.	PASS	.	intergenic	NR_120467,NM_001142641	dist=19993;dist=139003	.	.	.	12q24.33	.	.	.	.	.	.	.	.	.	.	.	.	.	.	.	.	.	.	.	.	.	.	.	.	.	.	.	.	.	.	.	.	.	.	.
chr12	132876989	.	T	G	.	PASS	CHFR	intronic	NM_001161344,NM_001161345,NM_001161346,NM_001161347,NM_018223	.	.	.	ENST00000266880.11,ENST00000450056.6,ENST00000432561.6,ENST00000443047.6	12q24.33	.	.	Score=2216;Name="1186421:AluSp(SINE)"	.	.	.	.	.	.	.	.	.	.	.	.	.	.	.	.	.	.	.	.	.	.	.	.	.	.	.	.	.	.	.	.
chr12	133069833	.	T	G	.	PASS	.	intergenic	NM_003428,NM_001300778	dist=6529;dist=10370	.	.	.	12q24.33	.	.	Score=2645;Name="1186932:AluY(SINE)"	.	.	.	.	.	.	.	.	.	.	.	.	.	.	.	.	.	.	.	.	.	.	.	.	.	.	.	.	.	.	.	.
chr12	133095991	rs868633439	A	C	.	PASS	ZNF140	intronic	NM_001300776,NM_001300777,NM_001300778,NM_003440	.	.	.	ENST00000319849.7,ENST00000440550.6,ENST00000355557.6,ENST00000544426.5	12q24.33	.	.	Score=8541;Name="1186991:LTR5A(LTR)"	rs868633439	.	.	.	.	.	.	.	.	.	.	.	.	.	.	.	.	.	.	.	.	.	.	.	.	.	.	.	.	.	.	.
chr12	133101546	rs918497779	G	A	.	PASS	ZNF140	intronic	NM_001300776,NM_001300777,NM_001300778,NM_003440	.	.	.	ENST00000544426.5,ENST00000319849.7,ENST00000355557.6,ENST00000440550.6	12q24.33	.	.	Score=2555;Name="1187012:AluY(SINE)"	rs918497779	.	.	.	.	.	.	.	.	.	.	.	.	.	.	.	.	.	.	.	.	.	.	.	.	.	.	.	.	.	.	.
chr13	16037813	.	A	G	.	PASS	.	intergenic	NONE,NONE	dist=NONE;dist=NONE	.	.	.	13p11.2	.	.	Score=1175;Name="1191289:ALR/Alpha(Satellite)"	.	.	.	.	.	.	.	.	.	.	.	.	.	.	.	.	.	.	.	.	.	.	.	.	.	.	.	.	.	.	.	.
chr13	16132614	rs977428192	T	A	.	PASS	.	intergenic	NONE,NR_027278	dist=NONE;dist=2062683	.	.	.	13p11.2	.	.	Score=1064;Name="1191290:ALR/Alpha(Satellite)"	rs977428192	.	.	.	.	.	.	.	.	.	.	.	.	.	.	.	.	.	.	.	.	.	.	.	.	.	.	.	.	.	.	.
chr13	16136823	.	G	T	.	PASS	.	intergenic	NONE,NR_027278	dist=NONE;dist=2058474	.	.	.	13p11.2	.	.	Score=1064;Name="1191290:ALR/Alpha(Satellite)"	.	.	.	.	.	.	.	.	.	.	.	.	.	.	.	.	.	.	.	.	.	.	.	.	.	.	.	.	.	.	.	.
chr13	16145220	rs1022869433	T	C	.	PASS	.	intergenic	NONE,NR_027278	dist=NONE;dist=2050077	.	.	.	13p11.2	.	.	Score=1064;Name="1191290:ALR/Alpha(Satellite)"	rs1022869433	.	.	.	.	.	.	.	.	.	.	.	.	.	.	.	.	.	.	.	.	.	.	.	.	.	.	.	.	.	.	.
chr13	16147540	.	C	T	.	PASS	.	intergenic	NONE,NR_027278	dist=NONE;dist=2047757	.	.	.	13p11.2	.	.	Score=1064;Name="1191290:ALR/Alpha(Satellite)"	.	.	.	.	.	.	.	.	.	.	.	.	.	.	.	.	.	.	.	.	.	.	.	.	.	.	.	.	.	.	.	.
chr13	16148698	.	G	A	.	PASS	.	intergenic	NONE,NR_027278	dist=NONE;dist=2046599	.	.	.	13p11.2	.	.	Score=1064;Name="1191290:ALR/Alpha(Satellite)"	.	.	.	.	.	.	.	.	.	.	.	.	.	.	.	.	.	.	.	.	.	.	.	.	.	.	.	.	.	.	.	.
chr13	16155227	.	A	T	.	PASS	.	intergenic	NONE,NR_027278	dist=NONE;dist=2040070	.	.	.	13p11.2	.	.	Score=1064;Name="1191290:ALR/Alpha(Satellite)"	.	.	.	.	.	.	.	.	.	.	.	.	.	.	.	.	.	.	.	.	.	.	.	.	.	.	.	.	.	.	.	.
chr13	16159632	.	C	G	.	PASS	.	intergenic	NONE,NR_027278	dist=NONE;dist=2035665	.	.	.	13p11.2	.	.	Score=1064;Name="1191290:ALR/Alpha(Satellite)"	.	.	.	.	.	.	.	.	.	.	.	.	.	.	.	.	.	.	.	.	.	.	.	.	.	.	.	.	.	.	.	.
chr13	16205383	.	G	T	.	PASS	.	intergenic	NONE,NR_027278	dist=NONE;dist=1989914	.	.	.	13p11.2	.	.	Score=1094;Name="1191291:ALR/Alpha(Satellite)"	.	.	.	.	.	.	.	.	.	.	.	.	.	.	.	.	.	.	.	.	.	.	.	.	.	.	.	.	.	.	.	.
chr13	16227368	.	A	T	.	PASS	.	intergenic	NONE,NR_027278	dist=NONE;dist=1967929	.	.	.	13p11.2	.	.	Score=1094;Name="1191291:ALR/Alpha(Satellite)"	.	.	.	.	.	.	.	.	.	.	.	.	.	.	.	.	.	.	.	.	.	.	.	.	.	.	.	.	.	.	.	.
chr13	16229760	.	G	C	.	PASS	.	intergenic	NONE,NR_027278	dist=NONE;dist=1965537	.	.	.	13p11.2	.	.	Score=1311;Name="1191292:ALR/Alpha(Satellite)"	.	.	.	.	.	.	.	.	.	.	.	.	.	.	.	.	.	.	.	.	.	.	.	.	.	.	.	.	.	.	.	.
chr13	16245221	.	T	G	.	PASS	.	intergenic	NONE,NR_027278	dist=NONE;dist=1950076	.	.	.	13p11.2	.	.	Score=1311;Name="1191292:ALR/Alpha(Satellite)"	.	.	.	.	.	.	.	.	.	.	.	.	.	.	.	.	.	.	.	.	.	.	.	.	.	.	.	.	.	.	.	.
chr13	16248400	rs975768161	G	A	.	PASS	.	intergenic	NONE,NR_027278	dist=NONE;dist=1946897	.	.	.	13p11.2	.	.	Score=1311;Name="1191292:ALR/Alpha(Satellite)"	rs975768161	.	.	.	.	.	.	.	.	.	.	.	.	.	.	.	.	.	.	.	.	.	.	.	.	.	.	.	.	.	.	.
chr13	16322459	rs1003047265	C	T	.	PASS	.	intergenic	NONE,NR_027278	dist=NONE;dist=1872838	.	.	.	13p11.2	.	.	Score=1154;Name="1191296:ALR/Alpha(Satellite)"	rs1003047265	.	.	.	.	.	.	.	.	.	.	.	.	.	.	.	.	.	.	.	.	.	.	.	.	.	.	.	.	.	.	.
chr13	16322918	.	A	G	.	PASS	.	intergenic	NONE,NR_027278	dist=NONE;dist=1872379	.	.	.	13p11.2	.	.	Score=1154;Name="1191296:ALR/Alpha(Satellite)"	.	.	.	.	.	.	.	.	.	.	.	.	.	.	.	.	.	.	.	.	.	.	.	.	.	.	.	.	.	.	.	.
chr13	16344648	.	G	A	.	PASS	.	intergenic	NONE,NR_027278	dist=NONE;dist=1850649	.	.	.	13p11.2	.	.	Score=1154;Name="1191296:ALR/Alpha(Satellite)"	.	.	.	.	.	.	.	.	.	.	.	.	.	.	.	.	.	.	.	.	.	.	.	.	.	.	.	.	.	.	.	.
chr13	16371988	.	G	A	.	PASS	.	intergenic	NONE,NR_027278	dist=NONE;dist=1823309	.	.	.	13p11.2	.	.	Score=1154;Name="1191296:ALR/Alpha(Satellite)"	.	.	.	.	.	.	.	.	.	.	.	.	.	.	.	.	.	.	.	.	.	.	.	.	.	.	.	.	.	.	.	.
chr13	16375971	.	G	T	.	PASS	.	intergenic	NONE,NR_027278	dist=NONE;dist=1819326	.	.	.	13p11.2	.	.	Score=1154;Name="1191296:ALR/Alpha(Satellite)"	.	.	.	.	.	.	.	.	.	.	.	.	.	.	.	.	.	.	.	.	.	.	.	.	.	.	.	.	.	.	.	.
chr13	16386237	.	G	T	.	PASS	.	intergenic	NONE,NR_027278	dist=NONE;dist=1809060	.	.	.	13p11.2	.	.	Score=1154;Name="1191296:ALR/Alpha(Satellite)"	.	.	.	.	.	.	.	.	.	.	.	.	.	.	.	.	.	.	.	.	.	.	.	.	.	.	.	.	.	.	.	.
chr13	16502541	.	G	T	.	PASS	.	intergenic	NONE,NR_027278	dist=NONE;dist=1692756	.	.	.	13p11.1	.	.	Score=1161;Name="1191297:ALR/Alpha(Satellite)"	.	.	.	.	.	.	.	.	.	.	.	.	.	.	.	.	.	.	.	.	.	.	.	.	.	.	.	.	.	.	.	.
chr13	16510313	.	T	A	.	PASS	.	intergenic	NONE,NR_027278	dist=NONE;dist=1684984	.	.	.	13p11.1	.	.	Score=1161;Name="1191297:ALR/Alpha(Satellite)"	.	.	.	.	.	.	.	.	.	.	.	.	.	.	.	.	.	.	.	.	.	.	.	.	.	.	.	.	.	.	.	.
chr13	16532389	.	G	C	.	PASS	.	intergenic	NONE,NR_027278	dist=NONE;dist=1662908	.	.	.	13p11.1	.	.	Score=1161;Name="1191297:ALR/Alpha(Satellite)"	.	.	.	.	.	.	.	.	.	.	.	.	.	.	.	.	.	.	.	.	.	.	.	.	.	.	.	.	.	.	.	.
chr13	16543708	.	A	G	.	PASS	.	intergenic	NONE,NR_027278	dist=NONE;dist=1651589	.	.	.	13p11.1	.	.	Score=1161;Name="1191297:ALR/Alpha(Satellite)"	.	.	.	.	.	.	.	.	.	.	.	.	.	.	.	.	.	.	.	.	.	.	.	.	.	.	.	.	.	.	.	.
chr13	16560815	.	A	T	.	PASS	.	intergenic	NONE,NR_027278	dist=NONE;dist=1634482	.	.	.	13p11.1	.	.	Score=1161;Name="1191297:ALR/Alpha(Satellite)"	.	.	.	.	.	.	.	.	.	.	.	.	.	.	.	.	.	.	.	.	.	.	.	.	.	.	.	.	.	.	.	.
chr13	16571916	.	C	T	.	PASS	.	intergenic	NONE,NR_027278	dist=NONE;dist=1623381	.	.	.	13p11.1	.	.	Score=1161;Name="1191297:ALR/Alpha(Satellite)"	.	.	.	.	.	.	.	.	.	.	.	.	.	.	.	.	.	.	.	.	.	.	.	.	.	.	.	.	.	.	.	.
chr13	16576847	.	T	C	.	PASS	.	intergenic	NONE,NR_027278	dist=NONE;dist=1618450	.	.	.	13p11.1	.	.	Score=1161;Name="1191297:ALR/Alpha(Satellite)"	.	.	.	.	.	.	.	.	.	.	.	.	.	.	.	.	.	.	.	.	.	.	.	.	.	.	.	.	.	.	.	.
chr13	16578501	.	G	C	.	PASS	.	intergenic	NONE,NR_027278	dist=NONE;dist=1616796	.	.	.	13p11.1	.	.	Score=1161;Name="1191297:ALR/Alpha(Satellite)"	.	.	.	.	.	.	.	.	.	.	.	.	.	.	.	.	.	.	.	.	.	.	.	.	.	.	.	.	.	.	.	.
chr13	16593898	.	G	A	.	PASS	.	intergenic	NONE,NR_027278	dist=NONE;dist=1601399	.	.	.	13p11.1	.	.	Score=1161;Name="1191297:ALR/Alpha(Satellite)"	.	.	.	.	.	.	.	.	.	.	.	.	.	.	.	.	.	.	.	.	.	.	.	.	.	.	.	.	.	.	.	.
chr13	16606962	.	T	C	.	PASS	.	intergenic	NONE,NR_027278	dist=NONE;dist=1588335	.	.	.	13p11.1	.	.	Score=1161;Name="1191297:ALR/Alpha(Satellite)"	.	.	.	.	.	.	.	.	.	.	.	.	.	.	.	.	.	.	.	.	.	.	.	.	.	.	.	.	.	.	.	.
chr13	16618073	.	T	A	.	PASS	.	intergenic	NONE,NR_027278	dist=NONE;dist=1577224	.	.	.	13p11.1	.	.	Score=1161;Name="1191297:ALR/Alpha(Satellite)"	.	.	.	.	.	.	.	.	.	.	.	.	.	.	.	.	.	.	.	.	.	.	.	.	.	.	.	.	.	.	.	.
chr13	16637087	.	A	G	.	PASS	.	intergenic	NONE,NR_027278	dist=NONE;dist=1558210	.	.	.	13p11.1	.	.	Score=1161;Name="1191297:ALR/Alpha(Satellite)"	.	.	.	.	.	.	.	.	.	.	.	.	.	.	.	.	.	.	.	.	.	.	.	.	.	.	.	.	.	.	.	.
chr13	16641045	.	A	G	.	PASS	.	intergenic	NONE,NR_027278	dist=NONE;dist=1554252	.	.	.	13p11.1	.	.	Score=1161;Name="1191297:ALR/Alpha(Satellite)"	.	.	.	.	.	.	.	.	.	.	.	.	.	.	.	.	.	.	.	.	.	.	.	.	.	.	.	.	.	.	.	.
chr13	16688829	.	T	A	.	PASS	.	intergenic	NONE,NR_027278	dist=NONE;dist=1506468	.	.	.	13p11.1	.	.	Score=1161;Name="1191297:ALR/Alpha(Satellite)"	.	.	.	.	.	.	.	.	.	.	.	.	.	.	.	.	.	.	.	.	.	.	.	.	.	.	.	.	.	.	.	.
chr13	16698149	.	T	C	.	PASS	.	intergenic	NONE,NR_027278	dist=NONE;dist=1497148	.	.	.	13p11.1	.	.	Score=1161;Name="1191297:ALR/Alpha(Satellite)"	.	.	.	.	.	.	.	.	.	.	.	.	.	.	.	.	.	.	.	.	.	.	.	.	.	.	.	.	.	.	.	.
chr13	16710028	.	G	T	.	PASS	.	intergenic	NONE,NR_027278	dist=NONE;dist=1485269	.	.	.	13p11.1	.	.	Score=1161;Name="1191297:ALR/Alpha(Satellite)"	.	.	.	.	.	.	.	.	.	.	.	.	.	.	.	.	.	.	.	.	.	.	.	.	.	.	.	.	.	.	.	.
chr13	16715199	.	A	G	.	PASS	.	intergenic	NONE,NR_027278	dist=NONE;dist=1480098	.	.	.	13p11.1	.	.	Score=1161;Name="1191297:ALR/Alpha(Satellite)"	.	.	.	.	.	.	.	.	.	.	.	.	.	.	.	.	.	.	.	.	.	.	.	.	.	.	.	.	.	.	.	.
chr13	16733056	.	G	C	.	PASS	.	intergenic	NONE,NR_027278	dist=NONE;dist=1462241	.	.	.	13p11.1	.	.	Score=1161;Name="1191297:ALR/Alpha(Satellite)"	.	.	.	.	.	.	.	.	.	.	.	.	.	.	.	.	.	.	.	.	.	.	.	.	.	.	.	.	.	.	.	.
chr13	16749716	.	A	G	.	PASS	.	intergenic	NONE,NR_027278	dist=NONE;dist=1445581	.	.	.	13p11.1	.	.	Score=1161;Name="1191297:ALR/Alpha(Satellite)"	.	.	.	.	.	.	.	.	.	.	.	.	.	.	.	.	.	.	.	.	.	.	.	.	.	.	.	.	.	.	.	.
chr13	16749871	.	G	A	.	PASS	.	intergenic	NONE,NR_027278	dist=NONE;dist=1445426	.	.	.	13p11.1	.	.	Score=1161;Name="1191297:ALR/Alpha(Satellite)"	.	.	.	.	.	.	.	.	.	.	.	.	.	.	.	.	.	.	.	.	.	.	.	.	.	.	.	.	.	.	.	.
chr13	16771999	.	A	T	.	PASS	.	intergenic	NONE,NR_027278	dist=NONE;dist=1423298	.	.	.	13p11.1	.	.	Score=1161;Name="1191297:ALR/Alpha(Satellite)"	.	.	.	.	.	.	.	.	.	.	.	.	.	.	.	.	.	.	.	.	.	.	.	.	.	.	.	.	.	.	.	.
chr13	16788106	.	G	T	.	PASS	.	intergenic	NONE,NR_027278	dist=NONE;dist=1407191	.	.	.	13p11.1	.	.	Score=1161;Name="1191297:ALR/Alpha(Satellite)"	.	.	.	.	.	.	.	.	.	.	.	.	.	.	.	.	.	.	.	.	.	.	.	.	.	.	.	.	.	.	.	.
chr13	16847525	.	T	A	.	PASS	.	intergenic	NONE,NR_027278	dist=NONE;dist=1347772	.	.	.	13p11.1	.	.	Score=1161;Name="1191297:ALR/Alpha(Satellite)"	.	.	.	.	.	.	.	.	.	.	.	.	.	.	.	.	.	.	.	.	.	.	.	.	.	.	.	.	.	.	.	.
chr13	16848977	.	G	A	.	PASS	.	intergenic	NONE,NR_027278	dist=NONE;dist=1346320	.	.	.	13p11.1	.	.	Score=1161;Name="1191297:ALR/Alpha(Satellite)"	.	.	.	.	.	.	.	.	.	.	.	.	.	.	.	.	.	.	.	.	.	.	.	.	.	.	.	.	.	.	.	.
chr13	16903266	.	G	T	.	PASS	.	intergenic	NONE,NR_027278	dist=NONE;dist=1292031	.	.	.	13p11.1	.	.	Score=1161;Name="1191297:ALR/Alpha(Satellite)"	.	.	.	.	.	.	.	.	.	.	.	.	.	.	.	.	.	.	.	.	.	.	.	.	.	.	.	.	.	.	.	.
chr13	16943416	.	G	A	.	PASS	.	intergenic	NONE,NR_027278	dist=NONE;dist=1251881	.	.	.	13p11.1	.	.	Score=1161;Name="1191297:ALR/Alpha(Satellite)"	.	.	.	.	.	.	.	.	.	.	.	.	.	.	.	.	.	.	.	.	.	.	.	.	.	.	.	.	.	.	.	.
chr13	16967817	.	T	A	.	PASS	.	intergenic	NONE,NR_027278	dist=NONE;dist=1227480	.	.	.	13p11.1	.	.	Score=1161;Name="1191297:ALR/Alpha(Satellite)"	.	.	.	.	.	.	.	.	.	.	.	.	.	.	.	.	.	.	.	.	.	.	.	.	.	.	.	.	.	.	.	.
chr13	17012699	.	C	A	.	PASS	.	intergenic	NONE,NR_027278	dist=NONE;dist=1182598	.	.	.	13p11.1	.	.	Score=1158;Name="1191298:ALR/Alpha(Satellite)"	.	.	.	.	.	.	.	.	.	.	.	.	.	.	.	.	.	.	.	.	.	.	.	.	.	.	.	.	.	.	.	.
chr13	17020162	.	A	G	.	PASS	.	intergenic	NONE,NR_027278	dist=NONE;dist=1175135	.	.	.	13p11.1	.	.	Score=1158;Name="1191298:ALR/Alpha(Satellite)"	.	.	.	.	.	.	.	.	.	.	.	.	.	.	.	.	.	.	.	.	.	.	.	.	.	.	.	.	.	.	.	.
chr13	17087841	.	C	T	.	PASS	.	intergenic	NONE,NR_027278	dist=NONE;dist=1107456	.	.	.	13p11.1	.	.	Score=1158;Name="1191298:ALR/Alpha(Satellite)"	.	.	.	.	.	.	.	.	.	.	.	.	.	.	.	.	.	.	.	.	.	.	.	.	.	.	.	.	.	.	.	.
chr13	17088815	.	C	G	.	PASS	.	intergenic	NONE,NR_027278	dist=NONE;dist=1106482	.	.	.	13p11.1	.	.	Score=1158;Name="1191298:ALR/Alpha(Satellite)"	.	.	.	.	.	.	.	.	.	.	.	.	.	.	.	.	.	.	.	.	.	.	.	.	.	.	.	.	.	.	.	.
chr13	17094803	.	T	C	.	PASS	.	intergenic	NONE,NR_027278	dist=NONE;dist=1100494	.	.	.	13p11.1	.	.	Score=1158;Name="1191298:ALR/Alpha(Satellite)"	.	.	.	.	.	.	.	.	.	.	.	.	.	.	.	.	.	.	.	.	.	.	.	.	.	.	.	.	.	.	.	.
chr13	17094879	.	C	T	.	PASS	.	intergenic	NONE,NR_027278	dist=NONE;dist=1100418	.	.	.	13p11.1	.	.	Score=1158;Name="1191298:ALR/Alpha(Satellite)"	.	.	.	.	.	.	.	.	.	.	.	.	.	.	.	.	.	.	.	.	.	.	.	.	.	.	.	.	.	.	.	.
chr13	17106073	.	G	C	.	PASS	.	intergenic	NONE,NR_027278	dist=NONE;dist=1089224	.	.	.	13p11.1	.	.	Score=1158;Name="1191298:ALR/Alpha(Satellite)"	.	.	.	.	.	.	.	.	.	.	.	.	.	.	.	.	.	.	.	.	.	.	.	.	.	.	.	.	.	.	.	.
chr13	17127022	.	G	A	.	PASS	.	intergenic	NONE,NR_027278	dist=NONE;dist=1068275	.	.	.	13p11.1	.	.	Score=1158;Name="1191298:ALR/Alpha(Satellite)"	.	.	.	.	.	.	.	.	.	.	.	.	.	.	.	.	.	.	.	.	.	.	.	.	.	.	.	.	.	.	.	.
chr13	17147128	.	T	C	.	PASS	.	intergenic	NONE,NR_027278	dist=NONE;dist=1048169	.	.	.	13p11.1	.	.	Score=1158;Name="1191298:ALR/Alpha(Satellite)"	.	.	.	.	.	.	.	.	.	.	.	.	.	.	.	.	.	.	.	.	.	.	.	.	.	.	.	.	.	.	.	.
chr13	17151275	.	A	T	.	PASS	.	intergenic	NONE,NR_027278	dist=NONE;dist=1044022	.	.	.	13p11.1	.	.	Score=1158;Name="1191298:ALR/Alpha(Satellite)"	.	.	.	.	.	.	.	.	.	.	.	.	.	.	.	.	.	.	.	.	.	.	.	.	.	.	.	.	.	.	.	.
chr13	17161087	.	G	A	.	PASS	.	intergenic	NONE,NR_027278	dist=NONE;dist=1034210	.	.	.	13p11.1	.	.	Score=1158;Name="1191298:ALR/Alpha(Satellite)"	.	.	.	.	.	.	.	.	.	.	.	.	.	.	.	.	.	.	.	.	.	.	.	.	.	.	.	.	.	.	.	.
chr13	17204191	.	C	A	.	PASS	.	intergenic	NONE,NR_027278	dist=NONE;dist=991106	.	.	.	13p11.1	.	.	Score=1158;Name="1191298:ALR/Alpha(Satellite)"	.	.	.	.	.	.	.	.	.	.	.	.	.	.	.	.	.	.	.	.	.	.	.	.	.	.	.	.	.	.	.	.
chr13	17215425	.	T	C	.	PASS	.	intergenic	NONE,NR_027278	dist=NONE;dist=979872	.	.	.	13p11.1	.	.	Score=1158;Name="1191298:ALR/Alpha(Satellite)"	.	.	.	.	.	.	.	.	.	.	.	.	.	.	.	.	.	.	.	.	.	.	.	.	.	.	.	.	.	.	.	.
chr13	17215583	.	A	C	.	PASS	.	intergenic	NONE,NR_027278	dist=NONE;dist=979714	.	.	.	13p11.1	.	.	Score=1158;Name="1191298:ALR/Alpha(Satellite)"	.	.	.	.	.	.	.	.	.	.	.	.	.	.	.	.	.	.	.	.	.	.	.	.	.	.	.	.	.	.	.	.
chr13	17218773	.	C	T	.	PASS	.	intergenic	NONE,NR_027278	dist=NONE;dist=976524	.	.	.	13p11.1	.	.	Score=1158;Name="1191298:ALR/Alpha(Satellite)"	.	.	.	.	.	.	.	.	.	.	.	.	.	.	.	.	.	.	.	.	.	.	.	.	.	.	.	.	.	.	.	.
chr13	17225024	.	G	C	.	PASS	.	intergenic	NONE,NR_027278	dist=NONE;dist=970273	.	.	.	13p11.1	.	.	Score=1158;Name="1191298:ALR/Alpha(Satellite)"	.	.	.	.	.	.	.	.	.	.	.	.	.	.	.	.	.	.	.	.	.	.	.	.	.	.	.	.	.	.	.	.
chr13	17240562	.	G	A	.	PASS	.	intergenic	NONE,NR_027278	dist=NONE;dist=954735	.	.	.	13p11.1	.	.	Score=1158;Name="1191298:ALR/Alpha(Satellite)"	.	.	.	.	.	.	.	.	.	.	.	.	.	.	.	.	.	.	.	.	.	.	.	.	.	.	.	.	.	.	.	.
chr13	17240568	.	T	A	.	PASS	.	intergenic	NONE,NR_027278	dist=NONE;dist=954729	.	.	.	13p11.1	.	.	Score=1158;Name="1191298:ALR/Alpha(Satellite)"	.	.	.	.	.	.	.	.	.	.	.	.	.	.	.	.	.	.	.	.	.	.	.	.	.	.	.	.	.	.	.	.
chr13	17253822	.	A	T	.	PASS	.	intergenic	NONE,NR_027278	dist=NONE;dist=941475	.	.	.	13p11.1	.	.	Score=1158;Name="1191298:ALR/Alpha(Satellite)"	.	.	.	.	.	.	.	.	.	.	.	.	.	.	.	.	.	.	.	.	.	.	.	.	.	.	.	.	.	.	.	.
chr13	17257356	.	G	T	.	PASS	.	intergenic	NONE,NR_027278	dist=NONE;dist=937941	.	.	.	13p11.1	.	.	Score=1158;Name="1191298:ALR/Alpha(Satellite)"	.	.	.	.	.	.	.	.	.	.	.	.	.	.	.	.	.	.	.	.	.	.	.	.	.	.	.	.	.	.	.	.
chr13	17336978	.	G	C	.	PASS	.	intergenic	NONE,NR_027278	dist=NONE;dist=858319	.	.	.	13p11.1	.	.	Score=1158;Name="1191298:ALR/Alpha(Satellite)"	.	.	.	.	.	.	.	.	.	.	.	.	.	.	.	.	.	.	.	.	.	.	.	.	.	.	.	.	.	.	.	.
chr13	17354769	.	G	C	.	PASS	.	intergenic	NONE,NR_027278	dist=NONE;dist=840528	.	.	.	13p11.1	.	.	Score=1158;Name="1191298:ALR/Alpha(Satellite)"	.	.	.	.	.	.	.	.	.	.	.	.	.	.	.	.	.	.	.	.	.	.	.	.	.	.	.	.	.	.	.	.
chr13	17358658	.	C	G	.	PASS	.	intergenic	NONE,NR_027278	dist=NONE;dist=836639	.	.	.	13p11.1	.	.	Score=1158;Name="1191298:ALR/Alpha(Satellite)"	.	.	.	.	.	.	.	.	.	.	.	.	.	.	.	.	.	.	.	.	.	.	.	.	.	.	.	.	.	.	.	.
chr13	17377626	.	G	A	.	PASS	.	intergenic	NONE,NR_027278	dist=NONE;dist=817671	.	.	.	13p11.1	.	.	Score=1158;Name="1191298:ALR/Alpha(Satellite)"	.	.	.	.	.	.	.	.	.	.	.	.	.	.	.	.	.	.	.	.	.	.	.	.	.	.	.	.	.	.	.	.
chr13	17398178	.	T	C	.	PASS	.	intergenic	NONE,NR_027278	dist=NONE;dist=797119	.	.	.	13p11.1	.	.	Score=1158;Name="1191298:ALR/Alpha(Satellite)"	.	.	.	.	.	.	.	.	.	.	.	.	.	.	.	.	.	.	.	.	.	.	.	.	.	.	.	.	.	.	.	.
chr13	17401157	.	A	T	.	PASS	.	intergenic	NONE,NR_027278	dist=NONE;dist=794140	.	.	.	13p11.1	.	.	Score=1158;Name="1191298:ALR/Alpha(Satellite)"	.	.	.	.	.	.	.	.	.	.	.	.	.	.	.	.	.	.	.	.	.	.	.	.	.	.	.	.	.	.	.	.
chr13	17434468	.	A	T	.	PASS	.	intergenic	NONE,NR_027278	dist=NONE;dist=760829	.	.	.	13p11.1	.	.	Score=1138;Name="1191302:ALR/Alpha(Satellite)"	.	.	.	.	.	.	.	.	.	.	.	.	.	.	.	.	.	.	.	.	.	.	.	.	.	.	.	.	.	.	.	.
chr13	17454896	.	C	T	.	PASS	.	intergenic	NONE,NR_027278	dist=NONE;dist=740401	.	.	.	13p11.1	.	.	Score=1138;Name="1191302:ALR/Alpha(Satellite)"	.	.	.	.	.	.	.	.	.	.	.	.	.	.	.	.	.	.	.	.	.	.	.	.	.	.	.	.	.	.	.	.
chr13	17466606	.	T	A	.	PASS	.	intergenic	NONE,NR_027278	dist=NONE;dist=728691	.	.	.	13p11.1	.	.	Score=1138;Name="1191302:ALR/Alpha(Satellite)"	.	.	.	.	.	.	.	.	.	.	.	.	.	.	.	.	.	.	.	.	.	.	.	.	.	.	.	.	.	.	.	.
chr13	17644932	.	C	G	.	PASS	.	intergenic	NONE,NR_027278	dist=NONE;dist=550365	.	.	.	13p11.1	.	.	Score=1108;Name="1191303:ALR/Alpha(Satellite)"	.	.	.	.	.	.	.	.	.	.	.	.	.	.	.	.	.	.	.	.	.	.	.	.	.	.	.	.	.	.	.	.
chr13	17875591	.	G	A	.	PASS	.	intergenic	NONE,NR_027278	dist=NONE;dist=319706	.	.	.	13q11	.	.	Score=1108;Name="1191303:ALR/Alpha(Satellite)"	.	.	.	.	.	.	.	.	.	.	.	.	.	.	.	.	.	.	.	.	.	.	.	.	.	.	.	.	.	.	.	.
chr13	17880747	.	T	C	.	PASS	.	intergenic	NONE,NR_027278	dist=NONE;dist=314550	.	.	.	13q11	.	.	Score=1108;Name="1191303:ALR/Alpha(Satellite)"	.	.	.	.	.	.	.	.	.	.	.	.	.	.	.	.	.	.	.	.	.	.	.	.	.	.	.	.	.	.	.	.
chr13	18192258	.	C	G	.	PASS	.	intergenic	NONE,NR_027278	dist=NONE;dist=3039	.	.	.	13q11	.	Score=0.980174;Name=chr21:10325556	.	.	.	.	.	.	.	.	.	.	.	.	.	.	.	.	.	.	.	.	.	.	.	.	.	.	.	.	.	.	.	.	.
chr13	19481176	rs77671800	T	A	.	PASS	TPTE2	intronic	NM_001141968,NM_130785,NM_199254	.	.	.	ENST00000255310.10,ENST00000400103.6,ENST00000382978.5,ENST00000390680.2,ENST00000400230.6	13q12.11	.	Score=0.962016;Name=chr21:10522552	.	rs77671800	.	.	.	.	.	.	.	.	.	.	.	.	.	.	.	.	.	.	.	.	.	.	.	.	.	.	.	.	.	.	.
chr13	20073176	.	G	A	.	PASS	ZMYM2	intronic	NM_001190964,NM_001190965,NM_003453,NM_197968	.	.	.	ENST00000610343.4,ENST00000382871.3,ENST00000382874.6	13q12.11	.	.	Score=2214;Name="1194880:AluSx1(SINE)"	.	.	.	.	.	.	.	.	.	.	.	.	.	.	.	.	.	.	.	.	.	.	.	.	.	.	.	.	.	.	.	.
chr13	20567081	.	T	G	.	PASS	IFT88	UTR5	NM_001318491,NM_001318493,NM_006531,NM_175605	NM_001318491:c.-7305T>G;NM_001318493:c.-896T>G;NM_006531:c.-7305T>G;NM_175605:c.-896T>G	.	.	ENST00000351808.9	13q12.11	.	.	.	.	.	.	.	.	.	.	.	.	.	.	.	.	.	.	.	.	.	.	.	.	.	.	.	.	.	.	.	.	.	.	.
chr13	23514823	.	T	A	.	PASS	.	intergenic	NR_038995,NM_148957	dist=27359;dist=55547	.	.	.	13q12.12	.	.	Score=2141;Name="1201312:AluSx1(SINE)"	.	.	.	.	.	.	.	.	.	.	.	.	.	.	.	.	.	.	.	.	.	.	.	.	.	.	.	.	.	.	.	.
chr13	25787686	.	G	A	.	PASS	ATP8A2	intronic	NM_001313741,NM_016529	.	.	.	ENST00000381655.6,ENST00000255283.9	13q12.13	.	.	.	.	.	.	.	.	.	.	.	.	.	.	.	.	.	.	.	.	.	.	.	.	.	.	.	.	.	.	.	.	.	.	.
chr13	25978382	.	G	A	.	PASS	ATP8A2	intronic	NM_001313741,NM_016529	.	.	.	ENST00000381655.6,ENST00000255283.9	13q12.13	.	.	.	.	.	.	.	.	.	.	.	.	.	.	.	.	.	.	.	.	.	.	.	.	.	.	.	.	.	.	.	.	.	.	.
chr13	26843652	.	A	T	.	PASS	.	intergenic	NM_005288,NM_182488	dist=82867;dist=222498	.	.	.	13q12.13	.	.	Score=6173;Name="1207156:L1MEf(LINE)"	.	.	.	.	.	.	.	.	.	.	.	.	.	.	.	.	.	.	.	.	.	.	.	.	.	.	.	.	.	.	.	.
chr13	27150126	.	T	G	.	PASS	USP12-AS1	ncRNA_intronic	NR_046547	.	.	.	ENST00000282344.10	13q12.13	.	.	Score=2145;Name="1207765:L1MA5(LINE)"	.	.	.	.	.	.	.	.	.	.	.	.	.	.	.	.	.	.	.	.	.	.	.	.	.	.	.	.	.	.	.	.
chr13	27779781	.	C	T	.	PASS	.	intergenic	NM_001206559,NM_145657	dist=112359;dist=12862	.	.	.	13q12.2	.	.	.	.	.	.	.	.	.	.	.	.	.	.	.	.	.	.	.	.	.	.	.	.	.	.	.	.	.	.	.	.	.	.	.
chr13	27949767	.	A	C	.	PASS	.	intergenic	NM_000209,NR_135254	dist=23453;dist=3759	.	.	.	13q12.2	.	.	Score=1979;Name="1209465:AluSz(SINE)"	.	.	.	.	.	.	.	.	.	.	.	.	.	.	.	.	.	.	.	.	.	.	.	.	.	.	.	.	.	.	.	.
chr13	27954544	.	G	C	.	PASS	.	ncRNA_exonic	NR_135254	.	.	.	ENST00000567234.1	13q12.2	.	.	.	.	.	.	.	.	.	.	.	.	.	.	.	.	.	.	.	.	.	.	.	.	.	.	.	.	.	.	.	.	.	.	.
chr13	28141682	.	G	C	.	PASS	PAN3	intronic	NM_175854	.	.	.	ENST00000399613.1,ENST00000380958.7	13q12.2	.	.	Score=1960;Name="1209969:AluSp(SINE)"	.	.	.	.	.	.	.	.	.	.	.	.	.	.	.	.	.	.	.	.	.	.	.	.	.	.	.	.	.	.	.	.
chr13	29318666	.	G	A	.	PASS	MTUS2	intronic	NM_001033602	.	.	.	ENST00000431530.7,ENST00000612955.4	13q12.3	.	.	.	.	.	.	.	.	.	.	.	.	.	.	.	.	.	.	.	.	.	.	.	.	.	.	.	.	.	.	.	.	.	.	.
chr13	30332579	.	C	G	.	PASS	.	intergenic	NM_032116,NR_024464	dist=25092;dist=7687	.	.	.	13q12.3	.	.	Score=1570;Name="1213850:MLT1B(LTR)"	.	.	.	.	.	.	.	.	.	.	.	.	.	.	.	.	.	.	.	.	.	.	.	.	.	.	.	.	.	.	.	.
chr13	30349025	.	C	G	.	PASS	LINC00426	ncRNA_intronic	NR_024464	.	.	.	ENST00000447147.5,ENST00000417079.5	13q12.3	.	.	.	.	.	.	.	.	.	.	.	.	.	.	.	.	.	.	.	.	.	.	.	.	.	.	.	.	.	.	.	.	.	.	.
chr13	32084913	.	C	T	.	PASS	FRY	intronic	NM_023037	.	.	.	ENST00000380250.7,ENST00000542859.5	13q13.1	.	.	Score=29;Name="1217155:(AC)n(Simple_repeat)"	.	.	.	.	.	.	.	.	.	.	.	.	.	.	.	.	.	.	.	.	.	.	.	.	.	.	.	.	.	.	.	.
chr13	32864130	.	T	C	.	PASS	LINC00423	ncRNA_intronic	NR_047020	.	.	.	.	13q13.1	.	.	.	.	.	.	.	.	.	.	.	.	.	.	.	.	.	.	.	.	.	.	.	.	.	.	.	.	.	.	.	.	.	.	.
chr13	34061229	.	T	G	.	PASS	.	intergenic	NM_181558,NR_146542	dist=94671;dist=286814	.	.	.	13q13.2	.	.	Score=805;Name="1220799:MLT1H1(LTR)"	.	.	.	.	.	.	.	.	.	.	.	.	.	.	.	.	.	.	.	.	.	.	.	.	.	.	.	.	.	.	.	.
chr13	34482933	.	A	T	.	PASS	LINC00457	ncRNA_intronic	NR_047036,NR_146542	.	.	.	ENST00000605909.1	13q13.2	.	.	Score=27452;Name="1221532:L1HS(LINE)"	.	.	.	.	.	.	.	.	.	.	.	.	.	.	.	.	.	.	.	.	.	.	.	.	.	.	.	.	.	.	.	.
chr13	35106673	.	C	G	.	PASS	NBEA	intronic	NM_015678	.	.	.	ENST00000379939.6,ENST00000310336.8,ENST00000400445.7,ENST00000629018.2	13q13.3	.	Score=0.934542;Name=chr15:21242098	.	.	.	.	.	.	.	.	.	.	.	.	.	.	.	.	.	.	.	.	.	.	.	.	.	.	.	.	.	.	.	.	.
chr13	35728364	.	G	C	.	PASS	.	intergenic	NR_132115,NM_004734	dist=29109;dist=40288	.	.	.	13q13.3	.	.	Score=2425;Name="1223593:AluSx(SINE)"	.	.	.	.	.	.	.	.	.	.	.	.	.	.	.	.	.	.	.	.	.	.	.	.	.	.	.	.	.	.	.	.
chr13	37338450	.	G	C	.	PASS	.	intergenic	NM_145203,NR_125762	dist=232786;dist=143015	.	.	.	13q13.3	.	.	Score=273;Name="1226371:L4_B_Mam(LINE)"	.	.	.	.	.	.	.	.	.	.	.	.	.	.	.	.	.	.	.	.	.	.	.	.	.	.	.	.	.	.	.	.
chr13	37815490	.	C	A	.	PASS	TRPC4	intronic	NM_001135955,NM_001135956,NM_001135957,NM_001135958,NM_003306,NM_016179	.	.	.	ENST00000379705.7,ENST00000426868.6,ENST00000379673.2,ENST00000358477.6,ENST00000355779.6,ENST00000338947.9	13q13.3	.	.	Score=5119;Name="1227102:L1PA13(LINE)"	.	.	.	.	.	.	.	.	.	.	.	.	.	.	.	.	.	.	.	.	.	.	.	.	.	.	.	.	.	.	.	.
chr13	38185129	.	G	T	.	PASS	.	intergenic	NR_047500,NM_001286705	dist=41897;dist=164642	.	.	.	13q13.3	.	.	Score=959;Name="1227657:MER67D(LTR)"	.	.	.	.	.	.	.	.	.	.	.	.	.	.	.	.	.	.	.	.	.	.	.	.	.	.	.	.	.	.	.	.
chr13	38684804	.	A	G	.	PASS	LINC00437	ncRNA_intronic	NR_126377	.	.	.	.	13q13.3	.	.	.	.	.	.	.	.	.	.	.	.	.	.	.	.	.	.	.	.	.	.	.	.	.	.	.	.	.	.	.	.	.	.	.
chr13	38968106	.	G	C	.	PASS	STOML3	intronic	NM_001144033,NM_145286	.	.	.	ENST00000379631.8,ENST00000423210.1	13q13.3	.	.	Score=325;Name="1228922:MER5B(DNA)"	.	.	.	.	.	.	.	.	.	.	.	.	.	.	.	.	.	.	.	.	.	.	.	.	.	.	.	.	.	.	.	.
chr13	39488830	.	G	A	.	PASS	LHFP	intronic	NM_005780	.	.	.	ENST00000379589.3	13q13.3	.	.	.	.	.	.	.	.	.	.	.	.	.	.	.	.	.	.	.	.	.	.	.	.	.	.	.	.	.	.	.	.	.	.	.
chr13	40625443	.	C	G	.	PASS	FOXO1	intronic	NM_002015	.	.	.	ENST00000379561.5	13q14.11	.	.	.	.	.	.	.	.	.	.	.	.	.	.	.	.	.	.	.	.	.	.	.	.	.	.	.	.	.	.	.	.	.	.	.
chr13	40953563	.	A	C	.	PASS	ELF1	intronic	NM_001145353,NM_172373	.	.	.	ENST00000239882.6,ENST00000442101.5,ENST00000625359.1	13q14.11	.	.	Score=1853;Name="1232490:MLT1B(LTR)"	.	.	.	.	.	.	.	.	.	.	.	.	.	.	.	.	.	.	.	.	.	.	.	.	.	.	.	.	.	.	.	.
chr13	41047596	.	T	C	.	PASS	.	intergenic	NM_172373,NM_007187	dist=28224;dist=13661	.	.	ENST00000442101.5	13q14.11	.	.	Score=25099;Name="1232672:L1PA5(LINE)"	.	.	.	.	.	.	.	.	.	.	.	.	.	.	.	.	.	.	.	.	.	.	.	.	.	.	.	.	.	.	.	.
chr13	41642394	.	C	G	.	PASS	VWA8	intronic	NM_015058	.	.	.	ENST00000379310.7	13q14.11	.	.	Score=2405;Name="1233913:AluSx3(SINE)"	.	.	.	.	.	.	.	.	.	.	.	.	.	.	.	.	.	.	.	.	.	.	.	.	.	.	.	.	.	.	.	.
chr13	43267007	.	C	G	.	PASS	ENOX1	intronic	NM_001127615,NM_001242863,NM_001347963,NM_001347964,NM_001347965,NM_001347966,NM_001347967,NM_001347968,NM_001347969,NM_001347970,NM_001347971,NM_017993	.	.	.	ENST00000412891.1,ENST00000261488.10	13q14.11	.	.	.	.	.	.	.	.	.	.	.	.	.	.	.	.	.	.	.	.	.	.	.	.	.	.	.	.	.	.	.	.	.	.	.
chr13	43506502	rs111891383	T	C	.	PASS	ENOX1	intronic	NM_001127615,NM_001242863,NM_001347963,NM_001347964,NM_001347965,NM_001347966,NM_001347967,NM_001347968,NM_001347969,NM_001347970,NM_001347971,NM_017993	.	.	.	ENST00000261488.10,ENST00000412891.1	13q14.11	.	.	Score=6798;Name="1237289:L1PA4(LINE)"	rs111891383	.	.	.	.	.	.	.	0.0258	0.0685	0.2724	0.1309	0.1859	0.133586	.	.	.	.	.	.	.	.	.	.	.	.	.	.	.	.	.	.
chr13	44663274	.	G	C	.	PASS	.	intergenic	NR_038381,NR_038433	dist=82842;dist=136230	.	.	ENST00000426509.1	13q14.12	.	.	Score=2390;Name="1239331:AluSc(SINE)"	.	.	.	.	.	.	.	.	.	.	.	.	.	.	.	.	.	.	.	.	.	.	.	.	.	.	.	.	.	.	.	.
chr13	44919788	.	A	C	.	PASS	.	intergenic	NR_038433,NM_012345	dist=110158;dist=19461	.	.	.	13q14.12	.	.	.	.	.	.	.	.	.	.	.	.	.	.	.	.	.	.	.	.	.	.	.	.	.	.	.	.	.	.	.	.	.	.	.
chr13	44993589	.	T	G	.	PASS	GPALPP1	intronic	NM_001316951,NM_001316952,NM_018559	.	.	.	ENST00000379151.8,ENST00000361121.6,ENST00000437748.2	13q14.12	.	.	Score=2087;Name="1240056:AluSx1(SINE)"	.	.	.	.	.	.	.	.	.	.	.	.	.	.	.	.	.	.	.	.	.	.	.	.	.	.	.	.	.	.	.	.
chr13	45858347	.	G	C	.	PASS	.	intergenic	NM_198849,NM_001076788	dist=6636;dist=96118	.	.	.	13q14.13	.	.	.	.	.	.	.	.	.	.	.	.	.	.	.	.	.	.	.	.	.	.	.	.	.	.	.	.	.	.	.	.	.	.	.
chr13	46199585	.	A	C	.	PASS	.	intergenic	NM_002298,NM_001282460	dist=17261;dist=12358	.	.	ENST00000398576.6	13q14.13	.	.	Score=2251;Name="1242583:AluSx(SINE)"	.	.	.	.	.	.	.	.	.	.	.	.	.	.	.	.	.	.	.	.	.	.	.	.	.	.	.	.	.	.	.	.
chr13	46276014	.	G	C	.	PASS	LRRC63	intronic	NM_001282460	.	.	.	ENST00000446175.5,ENST00000595396.1	13q14.13	.	.	Score=471;Name="1242705:L1M5(LINE)"	.	.	.	.	.	.	.	.	.	.	.	.	.	.	.	.	.	.	.	.	.	.	.	.	.	.	.	.	.	.	.	.
chr13	46319766	.	G	C	.	PASS	.	intergenic	NR_047493,NM_001286761	dist=21922;dist=21973	.	.	.	13q14.13	.	.	Score=461;Name="1242799:L1ME3E(LINE)"	.	.	.	.	.	.	.	.	.	.	.	.	.	.	.	.	.	.	.	.	.	.	.	.	.	.	.	.	.	.	.	.
chr13	46951040	rs572510514	C	T	.	PASS	.	intergenic	NM_000621,NR_047492	dist=53964;dist=979113	.	.	.	13q14.2	.	.	.	rs572510514	.	.	.	.	.	.	.	0.001	.	.	.	.	0.000199681	.	.	.	.	.	.	.	.	.	.	.	.	.	.	.	.	.	.
chr13	48619926	.	T	G	.	PASS	.	intergenic	NR_051983,NM_001308465	dist=39025;dist=33785	.	.	.	13q14.2	.	.	Score=2165;Name="1246935:AluSx(SINE)"	.	.	.	.	.	.	.	.	.	.	.	.	.	.	.	.	.	.	.	.	.	.	.	.	.	.	.	.	.	.	.	.
chr13	50400954	.	A	C	.	PASS	DLEU1	ncRNA_intronic	NR_109974	.	.	.	.	13q14.3	.	.	Score=953;Name="1250529:LTR16(LTR)"	.	.	.	.	.	.	.	.	.	.	.	.	.	.	.	.	.	.	.	.	.	.	.	.	.	.	.	.	.	.	.	.
chr13	50608376	.	G	C	.	PASS	.	intergenic	NR_109974,NM_198989	dist=79733;dist=102650	.	.	.	13q14.3	.	.	.	.	.	.	.	.	.	.	.	.	.	.	.	.	.	.	.	.	.	.	.	.	.	.	.	.	.	.	.	.	.	.	.
chr13	50723848	.	T	C	.	PASS	DLEU7	intronic	NM_198989	.	.	.	ENST00000400393.3	13q14.3	.	.	.	.	.	.	.	.	.	.	.	.	.	.	.	.	.	.	.	.	.	.	.	.	.	.	.	.	.	.	.	.	.	.	.
chr13	50984005	.	C	T	.	PASS	.	intergenic	NM_001142279,NR_003923	dist=13545;dist=10506	.	.	.	13q14.3	.	.	Score=26128;Name="1251526:L1PA2(LINE)"	.	.	.	.	.	.	.	.	.	.	.	.	.	.	.	.	.	.	.	.	.	.	.	.	.	.	.	.	.	.	.	.
chr13	51251284	.	G	T	.	PASS	FAM124A	intronic	NM_001242312,NM_001330522,NM_145019	.	.	.	ENST00000280057.6,ENST00000615498.4,ENST00000322475.12,ENST00000614765.4	13q14.3	.	.	.	.	.	.	.	.	.	.	.	.	.	.	.	.	.	.	.	.	.	.	.	.	.	.	.	.	.	.	.	.	.	.	.
chr13	52603940	.	T	A	.	PASS	.	intergenic	NR_002793,NM_001011724	dist=16850;dist=13530	.	.	ENST00000398039.2	13q14.3	.	Score=0.964477;Name=chr13:52197731	Score=2361;Name="1254418:AluSq2(SINE)"	.	.	.	.	.	.	.	.	.	.	.	.	.	.	.	.	.	.	.	.	.	.	.	.	.	.	.	.	.	.	.	.
chr13	52685750	.	T	G	.	PASS	SUGT1	intronic	NM_001130912,NM_001320831,NM_006704	.	.	.	ENST00000310528.8,ENST00000343788.10	13q14.3	.	.	.	.	.	.	.	.	.	.	.	.	.	.	.	.	.	.	.	.	.	.	.	.	.	.	.	.	.	.	.	.	.	.	.
chr13	53009283	.	A	C	.	PASS	.	intergenic	NM_032949,NM_006418	dist=160643;dist=19458	.	.	.	13q14.3	.	.	.	.	.	.	.	.	.	.	.	.	.	.	.	.	.	.	.	.	.	.	.	.	.	.	.	.	.	.	.	.	.	.	.
chr13	53092735	.	C	G	.	PASS	.	intergenic	NM_006418,NR_125788	dist=40674;dist=39011	.	.	.	13q14.3	.	.	Score=235;Name="1255358:L2c(LINE)"	.	.	.	.	.	.	.	.	.	.	.	.	.	.	.	.	.	.	.	.	.	.	.	.	.	.	.	.	.	.	.	.
chr13	53092858	.	C	G	.	PASS	.	intergenic	NM_006418,NR_125788	dist=40797;dist=38888	.	.	.	13q14.3	.	.	.	.	.	.	.	.	.	.	.	.	.	.	.	.	.	.	.	.	.	.	.	.	.	.	.	.	.	.	.	.	.	.	.
chr13	53239699	.	T	G	.	PASS	.	intergenic	NR_125788,NR_047488	dist=87799;dist=575720	.	.	.	13q14.3	.	.	.	.	.	.	.	.	.	.	.	.	.	.	.	.	.	.	.	.	.	.	.	.	.	.	.	.	.	.	.	.	.	.	.
chr13	53251655	.	T	A	.	PASS	.	intergenic	NR_125788,NR_047488	dist=99755;dist=563764	.	.	.	13q14.3	.	.	.	.	.	.	.	.	.	.	.	.	.	.	.	.	.	.	.	.	.	.	.	.	.	.	.	.	.	.	.	.	.	.	.
chr13	53344309	.	G	T	.	PASS	.	intergenic	NR_125788,NR_047488	dist=192409;dist=471110	.	.	.	13q14.3	.	.	Score=16146;Name="1255780:LTR53-int(LTR)"	.	.	.	.	.	.	.	.	.	.	.	.	.	.	.	.	.	.	.	.	.	.	.	.	.	.	.	.	.	.	.	.
chr13	53477443	.	C	A	.	PASS	.	intergenic	NR_125788,NR_047488	dist=325543;dist=337976	.	.	.	13q14.3	.	.	Score=304;Name="1255991:L1M5(LINE)"	.	.	.	.	.	.	.	.	.	.	.	.	.	.	.	.	.	.	.	.	.	.	.	.	.	.	.	.	.	.	.	.
chr13	53881280	.	T	G	.	PASS	.	intergenic	NR_047488,NR_108062	dist=5161;dist=243044	.	.	.	13q14.3	.	.	.	.	.	.	.	.	.	.	.	.	.	.	.	.	.	.	.	.	.	.	.	.	.	.	.	.	.	.	.	.	.	.	.
chr13	53898419	.	C	T	.	PASS	.	intergenic	NR_047488,NR_108062	dist=22300;dist=225905	.	.	.	13q14.3	.	.	Score=8403;Name="1256656:L1PA5(LINE)"	.	.	.	.	.	.	.	.	.	.	.	.	.	.	.	.	.	.	.	.	.	.	.	.	.	.	.	.	.	.	.	.
[truncated: 6,104 more rows]
[truncated: 40 more columns]

## Sheet: BAP1mut_C3_1.strelka_muTect.som
CHROM	POS	ID	REF	ALT	QUAL	FILTER	GeneName	Func	Gene	GeneDetail	ExonicFunc	AAChange	Gencode	cytoBand	wgRna	genomicSuperDups	Repeat	avsnp150	cosmic70	CLNALLELEID	CLNDN	CLNDISDB	CLNREVSTAT	CLNSIG	gwasCatalog	1000g2015aug_eas	1000g2015aug_sas	1000g2015aug_eur	1000g2015aug_afr	1000g2015aug_amr	1000g2015aug_all	esp6500siv2_all	ExAC_ALL	ExAC_AFR	ExAC_AMR	ExAC_EAS	ExAC_FIN	ExAC_NFE	ExAC_OTH	ExAC_SAS	gnomad_exome_AF	gnomad_exome_AF_raw	gnomad_exome_AF_afr	gnomad_exome_AF_sas	gnomad_exome_AF_amr	gnomad_exome_AF_eas	gnomad_exome_AF_nfe	gnomad_exome_AF_fin	gnomad_exome_AF_asj
[truncated: 8,461 more rows]
[truncated: 40 more columns]

[truncated: 1 more sheets: BAP1mut_C5_1.strelka_muTect.som]
