# Supplementary material for: BAP1 Loss Is Associated with Higher ASS1 Expression in Epithelioid Mesothelioma: Implications for Therapeutic Stratification
Source: Mol Cancer Res. 2023 Jan 20;21(5):411–27. doi: 10.1158/1541-7786.MCR-22-0635 (PMC10150242; doi:10.1158/1541-7786.MCR-22-0635)
Supplement: Supplementary Table S3 — Proteomics MeT5A isogenics and MPM cell lines [file mcr-22-0635_supplementary_table_s3_suppst3.xlsx]

## Sheet: Info ISOGENICS
Cell line	BAP1 status	SILAC label
++	BAP1 +/+	Heavy (H)
w-+	BAP1 w-/+	Light (L)
C3_1	BAP1 w-/KO clone1	Medium (M)
C5_1	BAP1 w-/KO clone2	Medium (M)
Key	Description
X1	++, w-+ and C3_1
X2	++, w-+ and C5_1
A	Technical repeat 1
B	Technical repeat 2
Combined	Combined analysis of A + B
Sheets	Description
Raw data	Data generated from MaxQuant analysis
Log2 Ratios	Log2 transformed ratios (cell line of interest normalised to control)
Changing C3_1 and C5_1	Hits changing in same direction (>1.5FC) in both mutant cell lines
Proteins increasing by 1.5FC
Proteins decreasing by 1.5FC
Significance <0.05
Proteins increasing or decreasing by 1.5FC in combined data

## Sheet: X1A raw data
Protein IDs	Majority protein IDs	Peptide counts (all)	Peptide counts (razor+unique)	Peptide counts (unique)	Protein names	Gene names	Fasta headers	Number of proteins	Peptides	Razor + unique peptides	Unique peptides	Sequence coverage [%]	Unique + razor sequence coverage [%]	Unique sequence coverage [%]	Mol. weight [kDa]	Sequence length	Sequence lengths	Q-value	Score	Ratio M/L	Ratio M/L normalized	Ratio M/L variability [%]	Ratio M/L count	Ratio M/L iso-count	Ratio M/L type	Ratio H/L	Ratio H/L normalized	Ratio H/L variability [%]	Ratio H/L count	Ratio H/L iso-count	Ratio H/L type	Ratio H/M	Ratio H/M normalized	Ratio H/M variability [%]	Ratio H/M count	Ratio H/M iso-count	Ratio H/M type	Intensity	Intensity L	Intensity M	Intensity H	Only identified by site	Reverse	Potential contaminant	id	Peptide IDs	Peptide is razor	Mod. peptide IDs	Evidence IDs
A0A024QZP7;P06493;A0A087WZZ9;E5RIU6	A0A024QZP7;P06493;A0A087WZZ9;E5RIU6	14;14;9;7	14;14;9;7	12;12;7;5	Cyclin-dependent kinase 1	CDC2;CDK1	>tr|A0A024QZP7|A0A024QZP7_HUMAN Cell division cycle 2, G1 to S and G2 to M, isoform CRA_a OS=Homo sapiens GN=CDC2 PE=1 SV=1;>sp|P06493|CDK1_HUMAN Cyclin-dependent kinase 1 OS=Homo sapiens GN=CDK1 PE=1 SV=3;>tr|A0A087WZZ9|A0A087WZZ9_HUMAN Cyclin-dependent k	4	14	14	12	64.6	64.6	58.2	34.081	297	297;297;224;189	0	65.388	0.29967	1.2649	15.33	17	0	Median	0.89743	0.94094	8.5397	17	0	Median	3.0652	0.75716	11.405	17	0	Median	762680000	338540000	109250000	314890000				0	472;955;2341;5828;6418;7111;7287;9327;9526;9949;11817;12262;14842;15383	True;True;True;True;True;True;True;True;True;True;True;True;True;True	489;988;2410;5978;6594;7309;7493;9592;9840;10303;12229;12683;15366;15927	1015;2210;5326;5327;13011;13012;14379;14380;15806;16339;21252;21696;22551;26551;27505;33903;35132
A0A024QZX5;A0A087X1N8;P35237	A0A024QZX5;A0A087X1N8;P35237	12;12;12	12;12;12	11;11;11	Serpin B6	SERPINB6	>tr|A0A024QZX5|A0A024QZX5_HUMAN Serpin B6 OS=Homo sapiens GN=SERPINB6 PE=1 SV=1;>tr|A0A087X1N8|A0A087X1N8_HUMAN Serpin B6 OS=Homo sapiens GN=SERPINB6 PE=1 SV=1;>sp|P35237|SPB6_HUMAN Serpin B6 OS=Homo sapiens GN=SERPINB6 PE=1 SV=3	3	12	12	11	42.1	42.1	40	43.024	380	380;395;376	0	88.504	0.14715	0.54075	5.3163	7	0	Median	1.1388	1.1132	2.7602	7	0	Median	7.4424	1.9673	11.753	7	0	Median	819860000	363300000	65051000	391510000				1	276;3543;4856;5341;5529;9149;9976;11112;11330;12574;13159;13278	True;True;True;True;True;True;True;True;True;True;True;True	282;3640;4985;5478;5672;9409;10331;11507;11734;13009;13616;13741	537;538;7883;10764;11772;11773;12374;20829;22630;22631;24973;25414;25415;28187;29566;29567;29568;29839
A0A024R4E5;Q00341;H0Y394;H7C0A4;C9JIZ1;C9J5E5;C9JZI8;C9JHS7;C9JHZ8;C9JES8;C9JT62;C9JK79;H7BZC3;H7C2D1;C9JBS3;C9JEJ8;A0A0E3D6N3;C9JHN6;C9JQ82;C9JMQ6;C9JHS9;C9J739	A0A024R4E5;Q00341;H0Y394	39;38;27;14;11;10;9;8;8;8;6;6;6;6;4;4;4;4;3;2;1;1	39;38;27;14;11;10;9;8;8;8;6;6;6;6;4;4;4;4;3;2;1;1	39;38;27;14;11;10;9;8;8;8;6;6;6;6;4;4;4;4;3;2;1;1	Vigilin	HDLBP	>tr|A0A024R4E5|A0A024R4E5_HUMAN High density lipoprotein binding protein (Vigilin), isoform CRA_a OS=Homo sapiens GN=HDLBP PE=1 SV=1;>sp|Q00341|VIGLN_HUMAN Vigilin OS=Homo sapiens GN=HDLBP PE=1 SV=2;>tr|H0Y394|H0Y394_HUMAN Vigilin (Fragment) OS=Homo sapien	22	39	39	39	36.8	36.8	36.8	141.44	1268	1268;1268;973;333;224;221;164;126;141;147;96;128;267;308;69;79;81;82;54;47;17;19	0	161.59	0.27123	1.0647	10.427	38	0	Median	1.0934	1.029	5.3875	38	0	Median	3.999	1.0267	11.185	38	0	Median	526420000	217720000	67084000	241620000				2	38;479;1200;1400;1519;1520;1699;2038;2249;2289;2465;2914;3084;4236;4346;4854;5632;5719;5720;6260;6369;6638;7830;7887;8725;8920;9102;9654;10812;10813;11141;11293;11355;12042;12432;12509;13398;13840;13916	True;True;True;True;True;True;True;True;True;True;True;True;True;True;True;True;True;True;True;True;True;True;True;True;True;True;True;True;True;True;True;True;True;True;True;True;True;True;True	40;496;1247;1450;1571;1572;1755;2103;2318;2358;2543;3004;3176;4350;4461;4983;5777;5866;5867;6431;6543;6826;8054;8112;8972;9170;9361;9362;9989;11195;11196;11536;11693;11760;12456;12861;12942;13862;14316;14402	64;1040;1041;2777;2778;3274;3556;3557;3558;3559;3966;3967;4721;5137;5138;5218;5596;6576;6577;6941;9330;9542;10762;12579;12763;12764;12765;14040;14264;14265;14879;14880;17766;17891;19914;20345;20737;20738;21982;21983;24280;24281;25028;25319;25465;27018;27891;28068;28069;30130;31272;31273;31562;31563;31564
A0A024R571;Q9H4M9;C9JC03;C9JDQ8;C9J2Z4;A0A0C4DH83;Q9NZN3;C9JIJ3;C9IZH1	A0A024R571;Q9H4M9;C9JC03	5;5;3;2;2;2;2;1;1	5;5;3;2;2;2;2;1;1	5;5;3;2;2;2;2;1;1	EH domain-containing protein 1	EHD1	>tr|A0A024R571|A0A024R571_HUMAN EH domain-containing protein 1 OS=Homo sapiens GN=EHD1 PE=1 SV=1;>sp|Q9H4M9|EHD1_HUMAN EH domain-containing protein 1 OS=Homo sapiens GN=EHD1 PE=1 SV=2;>tr|C9JC03|C9JC03_HUMAN EH domain-containing protein 1 (Fragment) OS=Hom	9	5	5	5	12.8	12.8	12.8	61.927	548	548;534;374;162;306;546;535;145;148	0	6.3238	0.32069	1.1866	12.904	4	0	Median	1.1571	1.1436	5.3112	4	0	Median	3.5287	0.93358	17.92	4	0	Median	46667000	17950000	7575100	21142000				3	5991;7295;8423;11528;14776	True;True;True;True;True	6143;7501;8661;11936;15298	13382;16351;19281;25867;33763
A0A024R6X1;O00748	A0A024R6X1;O00748	1;1	1;1	1;1	Carboxylic ester hydrolase;Cocaine esterase	CES2	>tr|A0A024R6X1|A0A024R6X1_HUMAN Carboxylic ester hydrolase OS=Homo sapiens GN=CES2 PE=1 SV=1;>sp|O00748|EST2_HUMAN Cocaine esterase OS=Homo sapiens GN=CES2 PE=1 SV=1	2	1	1	1	2.2	2.2	2.2	68.898	623	623;559	0.0023223	1.2634	NaN	NaN	NaN	1	1	Median	NaN	NaN	NaN	1	1	Median	NaN	NaN	NaN	1	1	Median	5809400	1609700	562660	3637100				4	6352	TRUE	6526	14235
A0A024R7W5;A0A087WXZ3;A0A087X0Q1;A0A087WY31;Q9BYJ9;Q9Y5A9;Q7Z739	A0A024R7W5;A0A087WXZ3;A0A087X0Q1;A0A087WY31;Q9BYJ9;Q9Y5A9;Q7Z739	1;1;1;1;1;1;1	1;1;1;1;1;1;1	1;1;1;1;1;1;1	YTH domain-containing family protein 1;YTH domain-containing family protein 2;YTH domain-containing family protein 3	YTHDF3;YTHDF2;YTHDF1	>tr|A0A024R7W5|A0A024R7W5_HUMAN YTH domain family, member 3, isoform CRA_a OS=Homo sapiens GN=YTHDF3 PE=1 SV=1;>tr|A0A087WXZ3|A0A087WXZ3_HUMAN YTH domain-containing family protein 2 OS=Homo sapiens GN=YTHDF2 PE=1 SV=1;>tr|A0A087X0Q1|A0A087X0Q1_HUMAN YTH do	7	1	1	1	1.7	1.7	1.7	58.311	534	534;569;583;588;559;579;585	0.00098814	1.775	0.28607	1.1216	4.8961	2	0	Median	1.0915	1.0871	8.7824	2	0	Median	3.6254	0.95338	1.0329	2	0	Median	16704000	6940300	2410200	7353600				5	12264	TRUE	12685	27508;27509
F5GXT8;F5H796;A0A024RBT2;Q9NR28;F5GX50	F5GXT8;F5H796;A0A024RBT2;Q9NR28	3;3;3;3;1	3;3;3;3;1	3;3;3;3;1	Diablo homolog, mitochondrial	DIABLO	>tr|F5GXT8|F5GXT8_HUMAN Diablo homolog, mitochondrial (Fragment) OS=Homo sapiens GN=DIABLO PE=1 SV=1;>tr|F5H796|F5H796_HUMAN Diablo homolog, mitochondrial (Fragment) OS=Homo sapiens GN=DIABLO PE=1 SV=5;>tr|A0A024RBT2|A0A024RBT2_HUMAN Diablo homolog, mitoch	5	3	3	3	17.3	17.3	17.3	15.252	133	133;157;166;239;129	0	5.9432	0.34112	1.2589	8.7107	3	0	Median	1.0343	1.058	9.3244	3	0	Median	2.9376	0.71371	15.696	3	0	Median	53741000	20531000	8960300	24250000				6	7298;7299;8729	True;True;True	7504;7505;8976	16354;16355;19919
A0A087WV90;E9PDN5;A0A087WTU7;A0A075B6G3;P11532	A0A087WV90;E9PDN5;A0A087WTU7;A0A075B6G3;P11532	1;1;1;1;1	1;1;1;1;1	1;1;1;1;1	Dystrophin	DMD	>tr|A0A087WV90|A0A087WV90_HUMAN Dystrophin OS=Homo sapiens GN=DMD PE=1 SV=1;>tr|E9PDN5|E9PDN5_HUMAN Dystrophin OS=Homo sapiens GN=DMD PE=1 SV=1;>tr|A0A087WTU7|A0A087WTU7_HUMAN Dystrophin OS=Homo sapiens GN=DMD PE=1 SV=1;>tr|A0A075B6G3|A0A075B6G3_HUMAN Dyst	5	1	1	1	0.3	0.3	0.3	426.09	3680	3680;3681;3684;3685;3685	0.00049975	1.9043	0.024289	0.087218	26.942	2	2	Median	NaN	NaN	NaN	1	1	Median	NaN	NaN	NaN	1	1	Median	6430900	6298200	72988	59688				7	9086	TRUE	9344	20716;20717
A0A075B730;A0A087X1U6;P58107	A0A075B730;A0A087X1U6;P58107	12;12;11	5;5;5	5;5;5	Epiplakin	EPPK1	>tr|A0A075B730|A0A075B730_HUMAN Epiplakin OS=Homo sapiens GN=EPPK1 PE=1 SV=2;>tr|A0A087X1U6|A0A087X1U6_HUMAN Epiplakin OS=Homo sapiens GN=EPPK1 PE=1 SV=1;>sp|P58107|EPIPL_HUMAN Epiplakin OS=Homo sapiens GN=EPPK1 PE=1 SV=2	3	12	5	5	14.3	7.3	7.3	553.12	5063	5063;5088;5090	0	27.333	0.33742	1.1392	11.644	7	0	Median	1.0484	1.0468	8.3186	7	0	Median	3.3107	0.91502	7.2412	7	0	Median	48402000	20050000	7032700	21319000				8	341;646;1238;4377;5216;8148;8915;9620;13964;14336;14337;14338	True;True;True;False;False;False;True;True;False;False;False;False	351;671;1286;4494;5352;5353;8378;9165;9952;14453;14843;14844;14845	674;1460;1461;1462;1463;1464;1465;2841;9621;9622;11518;11519;11520;11521;11522;18621;18622;18623;18624;18625;20337;20338;21911;31700;31701;31702;31703;32653;32654;32655;32656;32657;32658;32659;32660;32661;32662;32663;32664;32665;32666;32667;32668
A0A075B7C8;A0A075B743;A0A075B7B5;G5EA48;B7ZM87;A2RUF3;P0DMP2;P0DJJ0;O75044;Q7Z6B7	A0A075B7C8;A0A075B743;A0A075B7B5;G5EA48;B7ZM87;A2RUF3;P0DMP2;P0DJJ0;O75044;Q7Z6B7	1;1;1;1;1;1;1;1;1;1	1;1;1;1;1;1;1;1;1;1	1;1;1;1;1;1;1;1;1;1	SLIT-ROBO Rho GTPase-activating protein 2B;SLIT-ROBO Rho GTPase-activating protein 2C;SLIT-ROBO Rho GTPase-activating protein 2;SLIT-ROBO Rho GTPase-activating protein 1	SRGAP2;SRGAP1;SRGAP2B;SRGAP2C	>tr|A0A075B7C8|A0A075B7C8_HUMAN SLIT-ROBO Rho GTPase-activating protein 2 (Fragment) OS=Homo sapiens GN=SRGAP2 PE=4 SV=1;>tr|A0A075B743|A0A075B743_HUMAN SLIT-ROBO Rho GTPase-activating protein 2 (Fragment) OS=Homo sapiens GN=SRGAP2 PE=4 SV=1;>tr|A0A075B7B5	10	1	1	1	14	14	14	10.35	86	86;118;789;1022;1070;1071;458;459;1071;1085	0	7.1047	NaN	NaN	NaN	1	0	Median	NaN	NaN	NaN	1	0	Median	NaN	NaN	NaN	1	0	Median	1953800	760590	295120	898090				9	14383	TRUE	14890	32761
A0A075B785;Q9P260	A0A075B785;Q9P260	2;2	2;2	2;2	LisH domain and HEAT repeat-containing protein KIAA1468	KIAA1468	>tr|A0A075B785|A0A075B785_HUMAN LisH domain and HEAT repeat-containing protein KIAA1468 OS=Homo sapiens GN=KIAA1468 PE=1 SV=4;>sp|Q9P260|K1468_HUMAN LisH domain and HEAT repeat-containing protein KIAA1468 OS=Homo sapiens GN=KIAA1468 PE=1 SV=2	2	2	2	2	2.4	2.4	2.4	112.8	1018	1018;1216	0	10.007	0.24692	1.0088	14.697	3	2	Median	1.0429	0.99463	6.9111	3	2	Median	4.9265	1.1058	4.152	3	2	Plateau	5404500	2228600	655810	2520100				10	1026;8847	True;True	1063;9096	2412;2413;20179
Q9NW36;A0A087WSW7;F6XU50;A0A0B4J1V9;Q9NRZ9	Q9NW36;A0A087WSW7;F6XU50;A0A0B4J1V9;Q9NRZ9	1;1;1;1;1	1;1;1;1;1	1;1;1;1;1	Lymphoid-specific helicase	HELLS	>tr|Q9NW36|Q9NW36_HUMAN Lymphoid-specific helicase OS=Homo sapiens GN=HELLS PE=1 SV=1;>tr|A0A087WSW7|A0A087WSW7_HUMAN Helicase, lymphoid-specific, isoform CRA_d OS=Homo sapiens GN=HELLS PE=1 SV=1;>tr|F6XU50|F6XU50_HUMAN Helicase, lymphoid-specific, isoform	5	1	1	1	3.2	3.2	3.2	35.131	310	310;700;714;884;838	0	2.1081	NaN	NaN	NaN	1	1	Median	NaN	NaN	NaN	1	1	Median	NaN	NaN	NaN	1	1	Median	4773200	1897800	606550	2268900				11	9209	TRUE	9471	20995;20996
A0A087WSW9;A0A087WSY9;Q16881;E9PIR7;F8W809;E9PNQ6;E2QRB9;E9PKD3;A0A0B4J225;E9PIZ5;E9PRI8;E9PLT3;E9PKI4;E9PQI3;A0A096LPD9;E7EWK1;A0A096LPK7;E7ENA2;D3YTF8;D3YTF9;Q9NNW7	A0A087WSW9;A0A087WSY9;Q16881;E9PIR7;F8W809;E9PNQ6;E2QRB9	19;19;19;18;18;18;17;8;5;4;2;2;2;1;1;1;1;1;1;1;1	19;19;19;18;18;18;17;8;5;4;2;2;2;1;1;1;1;1;1;1;1	19;19;19;18;18;18;17;8;5;4;2;2;2;1;1;1;1;1;1;1;1	Thioredoxin reductase 1, cytoplasmic	TXNRD1	>tr|A0A087WSW9|A0A087WSW9_HUMAN Thioredoxin reductase 1, cytoplasmic OS=Homo sapiens GN=TXNRD1 PE=1 SV=1;>tr|A0A087WSY9|A0A087WSY9_HUMAN Thioredoxin reductase 1, cytoplasmic OS=Homo sapiens GN=TXNRD1 PE=1 SV=2;>sp|Q16881|TRXR1_HUMAN Thioredoxin reductase 1	21	19	19	19	53.8	53.8	53.8	60.078	548	548;648;649;482;498;568;460;175;104;139;44;70;72;53;306;338;463;494;499;523;524	0	122.72	0.22887	0.9603	13.052	21	0	Median	1.0778	1.0472	6.8196	21	0	Median	4.6494	1.1256	12.886	21	0	Median	3783300000	1645300000	415010000	1723000000				12	912;3654;3802;5829;5857;6330;6958;7054;8411;9477;10480;12540;13548;14217;14626;14661;14750;14833;15191	True;True;True;True;True;True;True;True;True;True;True;True;True;True;True;True;True;True;True	945;3751;3905;5979;6008;6503;7155;7251;8647;9779;10860;12974;14015;14717;15141;15179;15272;15356;15722	2102;2103;2104;2105;8099;8463;8464;8465;8466;13013;13094;14161;14162;15519;15691;15692;19259;21589;21590;23656;23657;23658;23659;28125;30510;30511;32314;32315;33403;33404;33405;33522;33523;33524;33525;33526;33719;33886;33887;34678
A0A087X2I2;A0A087WT12;P36969;K7ERP4;K7EJ20;A0A0A0MTT1;K7EKX7;K7ENB4;R4GNE4;A0A087X247	A0A087X2I2;A0A087WT12;P36969;K7ERP4;K7EJ20;A0A0A0MTT1;K7EKX7;K7ENB4	10;10;10;9;7;6;5;5;4;1	10;10;10;9;7;6;5;5;4;1	10;10;10;9;7;6;5;5;4;1	Glutathione peroxidase;Phospholipid hydroperoxide glutathione peroxidase, mitochondrial	GPX4	>tr|A0A087X2I2|A0A087X2I2_HUMAN Glutathione peroxidase OS=Homo sapiens GN=GPX4 PE=1 SV=1;>tr|A0A087WT12|A0A087WT12_HUMAN Glutathione peroxidase OS=Homo sapiens GN=GPX4 PE=1 SV=1;>sp|P36969|GPX4_HUMAN Phospholipid hydroperoxide glutathione peroxidase, mitoc	10	10	10	10	56.1	56.1	56.1	22.024	196	196;233;197;155;242;166;175;180;180;134	0	18.252	0.27259	1.0949	18.919	11	0	Median	1.1835	1.2056	5.519	11	0	Median	4.4095	1.1371	19.288	11	0	Median	218020000	87387000	27738000	102900000				13	2184;3805;4578;4643;5645;6071;10462;12449;15092;15093	True;True;True;True;True;True;True;True;True;True	2253;3908;4701;4768;5790;6227;10841;12880;15621;15622;15623	5024;8469;10086;10248;12613;13607;13608;23612;23613;27920;27921;34427;34428;34429;34430;34431
A0A087WT27;J3KN95;O95394;H0Y8I3;D6RIS6;H0Y987	A0A087WT27;J3KN95;O95394;H0Y8I3;D6RIS6;H0Y987	2;2;2;1;1;1	2;2;2;1;1;1	2;2;2;1;1;1	Phosphoacetylglucosamine mutase	PGM3	>tr|A0A087WT27|A0A087WT27_HUMAN Phosphoacetylglucosamine mutase OS=Homo sapiens GN=PGM3 PE=1 SV=1;>tr|J3KN95|J3KN95_HUMAN Phosphoacetylglucosamine mutase OS=Homo sapiens GN=PGM3 PE=1 SV=1;>sp|O95394|AGM1_HUMAN Phosphoacetylglucosamine mutase OS=Homo sapien	6	2	2	2	5	5	5	49.094	441	441;461;542;113;173;197	0.0066875	0.99958	0.2701	1.1041	14.047	2	1	Median	0.90898	0.86374	4.8637	2	1	Median	3.5154	0.94969	35.164	2	1	Median	29583000	13762000	3492600	12328000				14	524;1584	True;True	543;1638	1136;3716
A0A087WT51;Q9H2W6	A0A087WT51;Q9H2W6	1;1	1;1	1;1	39S ribosomal protein L46, mitochondrial	MRPL46	>tr|A0A087WT51|A0A087WT51_HUMAN 39S ribosomal protein L46, mitochondrial (Fragment) OS=Homo sapiens GN=MRPL46 PE=1 SV=1;>sp|Q9H2W6|RM46_HUMAN 39S ribosomal protein L46, mitochondrial OS=Homo sapiens GN=MRPL46 PE=1 SV=1	2	1	1	1	51.1	51.1	51.1	4.8993	45	45;279	0.0062556	1.0095	NaN	NaN	NaN	1	1	Median	NaN	NaN	NaN	1	1	Median	NaN	NaN	NaN	1	1	Median	12040000	5556600	1410200	5072800				15	2983	TRUE	3074	6740
A0A087WTA5;E7ERK9;Q9UI10;A0A087WW69;F8W8L6	A0A087WTA5;E7ERK9;Q9UI10;A0A087WW69;F8W8L6	2;2;2;1;1	2;2;2;1;1	2;2;2;1;1	Translation initiation factor eIF-2B subunit delta	EIF2B4	>tr|A0A087WTA5|A0A087WTA5_HUMAN Translation initiation factor eIF-2B subunit delta OS=Homo sapiens GN=EIF2B4 PE=1 SV=1;>tr|E7ERK9|E7ERK9_HUMAN Translation initiation factor eIF-2B subunit delta OS=Homo sapiens GN=EIF2B4 PE=1 SV=1;>sp|Q9UI10|EI2BD_HUMAN Tra	5	2	2	2	7.7	7.7	7.7	57.495	520	520;544;523;228;235	0	5.4045	0.27659	1.1178	31.421	2	2	Median	1.0629	1.0231	2.9094	2	2	Median	3.8428	0.96592	28.512	2	2	Median	14513000	5721400	1762900	7028600				16	1493;11711	True;True	1545;12119	3515;26329
A0A087WTC9;G3V5I6;G3V256;H0YJA2;Q6PJT7	A0A087WTC9;G3V5I6;G3V256;H0YJA2;Q6PJT7	1;1;1;1;1	1;1;1;1;1	1;1;1;1;1	Zinc finger CCCH domain-containing protein 14	ZC3H14	>tr|A0A087WTC9|A0A087WTC9_HUMAN Zinc finger CCCH domain-containing protein 14 (Fragment) OS=Homo sapiens GN=ZC3H14 PE=1 SV=1;>tr|G3V5I6|G3V5I6_HUMAN Zinc finger CCCH domain-containing protein 14 OS=Homo sapiens GN=ZC3H14 PE=1 SV=1;>tr|G3V256|G3V256_HUMAN Z	5	1	1	1	6.8	6.8	6.8	16.789	148	148;420;605;651;736	0.0036364	1.1256	NaN	NaN	NaN	1	1	Median	NaN	NaN	NaN	1	1	Median	NaN	NaN	NaN	1	1	Median	776070	331240	105890	338940				17	13120	TRUE	13577	29496
F5H5N1;A0A087WXF6;A0A087WTI3;F5GXJ1;O75251	F5H5N1;A0A087WXF6;A0A087WTI3;F5GXJ1;O75251	1;1;1;1;1	1;1;1;1;1	1;1;1;1;1	NADH dehydrogenase [ubiquinone] iron-sulfur protein 7, mitochondrial	NDUFS7	>tr|F5H5N1|F5H5N1_HUMAN NADH dehydrogenase [ubiquinone] iron-sulfur protein 7, mitochondrial OS=Homo sapiens GN=NDUFS7 PE=1 SV=1;>tr|A0A087WXF6|A0A087WXF6_HUMAN NADH dehydrogenase [ubiquinone] iron-sulfur protein 7, mitochondrial OS=Homo sapiens GN=NDUFS7	5	1	1	1	4.9	4.9	4.9	19.77	182	182;214;214;236;213	0	2.9882	NaN	NaN	NaN	1	0	Median	NaN	NaN	NaN	1	0	Median	NaN	NaN	NaN	1	0	Median	10347000	4254700	1075400	5016900				18	7495	TRUE	7712	16907
A0A087WTM7;P04114;A8MUN2	A0A087WTM7;P04114;A8MUN2	6;6;3	4;4;1	4;4;1	Apolipoprotein B-100;Apolipoprotein B-48	APOB	>tr|A0A087WTM7|A0A087WTM7_HUMAN Apolipoprotein B-100 OS=Homo sapiens GN=APOB PE=1 SV=1;>sp|P04114|APOB_HUMAN Apolipoprotein B-100 OS=Homo sapiens GN=APOB PE=1 SV=2;>tr|A8MUN2|A8MUN2_HUMAN Apolipoprotein B-100 OS=Homo sapiens GN=APOB PE=1 SV=2	3	6	4	4	1.6	0.9	0.9	489.83	4344	4344;4563;828	0	3.2404	0.12912	0.49967	221.83	4	4	Median	2.6405	2.6464	211.79	3	3	Plateau	0.69771	0.12937	49.577	3	3	Median	20132000	9155300	9506600	1470200				19	4374;5286;5723;10211;12448;15000	False;True;False;True;True;True	4489;5423;5870;10579;12879;15528	9607;9608;9609;9610;11678;12768;12769;12770;12771;23130;27917;27918;27919;34225
A0A087WTP3;Q92945;M0R0I5;M0QYH3;M0QXW7;M0QYG1;M0R0C6;M0R3J3;M0R251;M0R263	A0A087WTP3;Q92945;M0R0I5	14;14;7;4;3;2;2;2;1;1	14;14;7;4;3;2;2;2;1;1	13;13;7;4;3;1;1;1;0;0	Far upstream element-binding protein 2	KHSRP	>tr|A0A087WTP3|A0A087WTP3_HUMAN Far upstream element-binding protein 2 OS=Homo sapiens GN=KHSRP PE=1 SV=1;>sp|Q92945|FUBP2_HUMAN Far upstream element-binding protein 2 OS=Homo sapiens GN=KHSRP PE=1 SV=4;>tr|M0R0I5|M0R0I5_HUMAN Far upstream element-binding	10	14	14	13	27.6	27.6	25.3	73.027	711	711;711;279;169;116;114;176;269;79;143	0	77.777	0.27227	1.1206	13.124	20	0	Median	1.0398	1.0089	9.1542	20	0	Median	3.7568	0.97129	13.85	20	0	Median	331860000	142560000	42644000	146650000				20	761;1824;2006;5460;5837;5839;5883;5983;6359;9483;9557;12212;13063;14381	True;True;True;True;True;True;True;True;True;True;True;True;True;True	791;1881;2070;5601;5988;5990;6034;6135;6533;9785;9875;12632;13517;14888	1770;4232;4233;4606;12158;13033;13035;13036;13138;13343;13344;14244;14245;14246;21600;21743;27400;27401;29372;32758;32759
A0A087WTT1;P11940;E7EQV3;E7ERJ7;H0YAR2;Q9H361;E5RJB9;H0YAP2;H0YBN4;E5RGH3;E5RH24;H0YB86;Q4VXU2;E5RHG7;H0YAS7;H0YAS6;H0YB75;H0YC10;E5RGC4;E5RFD8;H0YER0;H0Y6X6;Q96DU9	A0A087WTT1;P11940;E7EQV3;E7ERJ7;H0YAR2;Q9H361	16;16;15;14;8;8;5;5;5;4;4;4;4;2;2;2;2;1;1;1;1;1;1	16;16;15;14;8;8;5;5;5;4;4;4;4;2;2;2;2;1;1;1;1;1;1	8;8;8;7;5;5;1;5;1;1;1;2;2;0;1;1;1;1;0;0;0;0;1	Polyadenylate-binding protein;Polyadenylate-binding protein 1;Polyadenylate-binding protein 3	PABPC1;PABPC3	>tr|A0A087WTT1|A0A087WTT1_HUMAN Polyadenylate-binding protein OS=Homo sapiens GN=PABPC1 PE=1 SV=1;>sp|P11940|PABP1_HUMAN Polyadenylate-binding protein 1 OS=Homo sapiens GN=PABPC1 PE=1 SV=2;>tr|E7EQV3|E7EQV3_HUMAN Polyadenylate-binding protein OS=Homo sapie	23	16	16	8	37.4	37.4	17	58.535	522	522;636;591;604;284;631;129;131;175;108;118;165;614;75;136;169;183;42;43;61;68;195;382	0	126.23	0.26866	1.0784	15.668	22	0	Median	1.0211	0.99111	5.3575	22	0	Median	3.7883	0.94482	17.718	22	0	Median	1454500000	624270000	186850000	643380000				21	809;891;1128;2830;3688;3989;4389;4392;6549;6612;9947;11383;11518;11536;11608;15312	True;True;True;True;True;True;True;True;True;True;True;True;True;True;True;True	840;923;1168;2916;3786;4099;4507;4510;6734;6735;6800;10301;11789;11926;11944;12016;15855	1865;1866;2051;2610;2611;2612;2613;6375;8153;8820;8821;8822;9648;9649;9661;9662;14711;14712;14825;14826;14827;22549;25516;25849;25880;26041;26042;34981;34982
Q5JWB9;A0A087WTT2;Q96A57	Q5JWB9;A0A087WTT2;Q96A57	1;1;1	1;1;1	1;1;1	Transmembrane protein 230	TMEM230	>tr|Q5JWB9|Q5JWB9_HUMAN Transmembrane protein 230 (Fragment) OS=Homo sapiens GN=TMEM230 PE=1 SV=1;>tr|A0A087WTT2|A0A087WTT2_HUMAN Transmembrane protein 230 OS=Homo sapiens GN=TMEM230 PE=1 SV=1;>sp|Q96A57|TM230_HUMAN Transmembrane protein 230 OS=Homo sapien	3	1	1	1	14.9	14.9	14.9	7.9924	74	74;127;120	0	2.4124	0.21328	0.91527	35.31	2	2	Median	0.80258	0.81403	0.78786	2	2	Median	3.763	0.8966	35.54	2	2	Median	45263000	23362000	4090700	17810000				22	12883	TRUE	13336	28964;28965
A0A087WTV6;Q96C36;J3KR12;A0A087WZR9	A0A087WTV6;Q96C36;J3KR12	6;6;5;2	6;6;5;2	5;5;4;1	Pyrroline-5-carboxylate reductase 2	PYCR2	>tr|A0A087WTV6|A0A087WTV6_HUMAN Pyrroline-5-carboxylate reductase 2 OS=Homo sapiens GN=PYCR2 PE=1 SV=1;>sp|Q96C36|P5CR2_HUMAN Pyrroline-5-carboxylate reductase 2 OS=Homo sapiens GN=PYCR2 PE=1 SV=1;>tr|J3KR12|J3KR12_HUMAN Uncharacterized protein OS=Homo sap	4	6	6	5	31.3	31.3	26	25.868	246	246;320;359;319	0	40.288	0.24165	0.98009	10.504	5	0	Median	1.0975	1.1166	8.0097	5	0	Median	4.1148	1.07	12.305	5	0	Median	156500000	66427000	19112000	70957000				23	4435;5932;5933;11637;12167;13936	True;True;True;True;True;True	4553;6083;6084;12045;12585;14422	9769;9770;13243;13244;26163;27317;31622
A0A087WVR3;A0A087WTW0;Q96T88	A0A087WVR3;A0A087WTW0;Q96T88	1;1;1	1;1;1	1;1;1	E3 ubiquitin-protein ligase UHRF1	UHRF1	>tr|A0A087WVR3|A0A087WVR3_HUMAN E3 ubiquitin-protein ligase UHRF1 OS=Homo sapiens GN=UHRF1 PE=1 SV=1;>tr|A0A087WTW0|A0A087WTW0_HUMAN E3 ubiquitin-protein ligase UHRF1 OS=Homo sapiens GN=UHRF1 PE=1 SV=1;>sp|Q96T88|UHRF1_HUMAN E3 ubiquitin-protein ligase UHR	3	1	1	1	1.2	1.2	1.2	91.099	806	806;857;793	0	2.209	NaN	NaN	NaN	1	1	Median	NaN	NaN	NaN	1	1	Median	NaN	NaN	NaN	1	1	Median	3430000	1427800	273250	1728900				24	8430	TRUE	8668	19291
A0A087WTZ5;E9PJ81;E9PRQ7;Q04323	A0A087WTZ5;E9PJ81;E9PRQ7;Q04323	2;2;2;2	2;2;2;2	2;2;2;2	UBX domain-containing protein 1	UBXN1	>tr|A0A087WTZ5|A0A087WTZ5_HUMAN UBX domain-containing protein 1 OS=Homo sapiens GN=UBXN1 PE=1 SV=1;>tr|E9PJ81|E9PJ81_HUMAN UBX domain-containing protein 1 (Fragment) OS=Homo sapiens GN=UBXN1 PE=1 SV=1;>tr|E9PRQ7|E9PRQ7_HUMAN UBX domain-containing protein 1	4	2	2	2	11.8	11.8	11.8	27.015	238	238;290;293;297	0	2.1976	0.28127	1.0058	75.578	3	1	Median	0.92415	0.90334	21.849	3	1	Median	3.3043	0.88813	56.678	3	1	Median	105920000	48912000	14754000	42252000				25	403;8513	True;True	418;419;8756	859;860;19465
R4GMM1;A0A087WU07;R4GNA1;Q5TGZ0	R4GMM1;A0A087WU07;R4GNA1;Q5TGZ0	1;1;1;1	1;1;1;1	1;1;1;1	MICOS complex subunit MIC10	MINOS1-NBL1;MINOS1	>tr|R4GMM1|R4GMM1_HUMAN Protein MINOS1-NBL1 (Fragment) OS=Homo sapiens GN=MINOS1-NBL1 PE=4 SV=1;>tr|A0A087WU07|A0A087WU07_HUMAN MICOS complex subunit MIC10 OS=Homo sapiens GN=MINOS1 PE=1 SV=1;>tr|R4GNA1|R4GNA1_HUMAN Protein MINOS1-NBL1 (Fragment) OS=Homo s	4	1	1	1	17.4	17.4	17.4	5.0428	46	46;62;71;78	0.0049305	1.0307	NaN	NaN	NaN	1	0	Median	NaN	NaN	NaN	1	0	Median	NaN	NaN	NaN	1	0	Median	6967600	2956000	853490	3158100				26	1939	TRUE	1998	4482
A0A0B4J231;A0A087WWC9;A0A087WXC3;A0A087WWU7;A0A087WYN7;A0A087WWT5;A0A087WU42;A0A087X2A1;A0A087WYR4;A0A087WX49;B9A064	A0A0B4J231;A0A087WWC9;A0A087WXC3;A0A087WWU7;A0A087WYN7;A0A087WWT5;A0A087WU42;A0A087X2A1;A0A087WYR4;A0A087WX49;B9A064	1;1;1;1;1;1;1;1;1;1;1	1;1;1;1;1;1;1;1;1;1;1	1;1;1;1;1;1;1;1;1;1;1	Immunoglobulin lambda-like polypeptide 5	IGLL5	>tr|A0A0B4J231|A0A0B4J231_HUMAN Immunoglobulin lambda-like polypeptide 5 OS=Homo sapiens GN=IGLL5 PE=1 SV=1;>tr|A0A087WWC9|A0A087WWC9_HUMAN Immunoglobulin lambda-like polypeptide 5 OS=Homo sapiens GN=IGLL5 PE=1 SV=1;>tr|A0A087WXC3|A0A087WXC3_HUMAN Immunogl	11	1	1	1	3.7	3.7	3.7	23.15	215	215;231;232;233;234;234;234;235;235;235;214	0.0014507	1.5716	NaN	NaN	NaN	1	1	Median	NaN	NaN	NaN	1	1	Median	NaN	NaN	NaN	1	1	Median	6423200	6153400	132770	136970				27	14607	TRUE	15121	33363
E9PL01;A0A087WUC6;Q15005;E9PI68;E9PRB9	E9PL01;A0A087WUC6;Q15005;E9PI68;E9PRB9	4;4;4;3;2	4;4;4;3;2	4;4;4;3;2	Signal peptidase complex subunit 2	SPCS2	>tr|E9PL01|E9PL01_HUMAN Signal peptidase complex subunit 2 OS=Homo sapiens GN=SPCS2 PE=1 SV=1;>tr|A0A087WUC6|A0A087WUC6_HUMAN Signal peptidase complex subunit 2 OS=Homo sapiens GN=SPCS2 PE=1 SV=1;>sp|Q15005|SPCS2_HUMAN Signal peptidase complex subunit 2 OS	5	4	4	4	21	21	21	17.027	157	157;227;226;257;87	0	3.5831	0.29249	1.0814	14.45	4	0	Median	0.93574	0.95161	2.3298	4	0	Median	3.2208	0.85577	13.343	4	0	Median	86860000	37977000	12113000	36770000				28	9;7873;8958;11353	True;True;True;True	9;8097;9211;11758	13;17845;17846;20429;25463
A0A087WUD3;Q9NRP0	A0A087WUD3;Q9NRP0	1;1	1;1	1;1	Oligosaccharyltransferase complex subunit OSTC	OSTC	>tr|A0A087WUD3|A0A087WUD3_HUMAN Oligosaccharyltransferase complex subunit OSTC OS=Homo sapiens GN=OSTC PE=1 SV=1;>sp|Q9NRP0|OSTC_HUMAN Oligosaccharyltransferase complex subunit OSTC OS=Homo sapiens GN=OSTC PE=1 SV=1	2	1	1	1	14.5	14.5	14.5	9.369	83	83;149	0	9.4458	NaN	NaN	NaN	1	0	Median	NaN	NaN	NaN	1	0	Median	NaN	NaN	NaN	1	0	Median	72582000	32777000	8117700	31688000				29	14293	TRUE	14800	32534
A0A087WUK2;O14979	A0A087WUK2;O14979	6;6	5;5	5;5	Heterogeneous nuclear ribonucleoprotein D-like	HNRNPDL	>tr|A0A087WUK2|A0A087WUK2_HUMAN Heterogeneous nuclear ribonucleoprotein D-like OS=Homo sapiens GN=HNRNPDL PE=1 SV=1;>sp|O14979|HNRDL_HUMAN Heterogeneous nuclear ribonucleoprotein D-like OS=Homo sapiens GN=HNRNPDL PE=1 SV=3	2	6	5	5	17.1	14.9	14.9	40.04	363	363;420	0	11.421	0.23311	1.018	20.001	6	0	Median	0.95774	0.91497	13.871	6	0	Median	3.8512	0.92979	23.002	6	0	Median	138840000	63612000	16782000	58444000				30	2395;3656;4366;4391;9437;10857	True;True;True;False;True;True	2467;3753;4481;4509;9732;11241	5436;8101;9599;9654;9655;9656;9657;9658;9659;9660;21512;24368;24369
A0A087WUL2;P49720;A0A087WXQ8;A0A087WY10	A0A087WUL2;P49720;A0A087WXQ8;A0A087WY10	5;5;4;4	5;5;4;4	5;5;4;4	Proteasome subunit beta type-3	PSMB3	>tr|A0A087WUL2|A0A087WUL2_HUMAN Proteasome subunit beta type-3 (Fragment) OS=Homo sapiens GN=PSMB3 PE=1 SV=1;>sp|P49720|PSB3_HUMAN Proteasome subunit beta type-3 OS=Homo sapiens GN=PSMB3 PE=1 SV=2;>tr|A0A087WXQ8|A0A087WXQ8_HUMAN Proteasome subunit beta typ	4	5	5	5	40	40	40	16.161	145	145;205;107;112	0	49.621	0.26761	1.0066	14.241	7	0	Median	0.96676	0.97819	5.7089	7	0	Median	3.8648	0.96076	10.272	7	0	Median	151530000	65674000	20074000	65782000				31	3671;3692;8466;8467;9266	True;True;True;True;True	3768;3769;3790;8706;8707;9530	8127;8128;8157;19372;19373;19374;21139;21140
A0A087X1F5;A0A087WYV9;A0A087WUM0;P57105	A0A087X1F5;A0A087WYV9;A0A087WUM0;P57105	1;1;1;1	1;1;1;1	1;1;1;1	Synaptojanin-2-binding protein	SYNJ2BP-COX16;SYNJ2BP	>tr|A0A087X1F5|A0A087X1F5_HUMAN Protein SYNJ2BP-COX16 (Fragment) OS=Homo sapiens GN=SYNJ2BP-COX16 PE=4 SV=3;>tr|A0A087WYV9|A0A087WYV9_HUMAN Protein SYNJ2BP-COX16 OS=Homo sapiens GN=SYNJ2BP-COX16 PE=4 SV=1;>tr|A0A087WUM0|A0A087WUM0_HUMAN Protein SYNJ2BP-COX	4	1	1	1	5.9	5.9	5.9	17.301	153	153;182;186;145	0.0027447	1.168	NaN	NaN	NaN	1	0	Median	NaN	NaN	NaN	1	0	Median	NaN	NaN	NaN	1	0	Median	8117700	3120100	1776800	3220700				32	9712	TRUE	10059	22107
A0A087WUQ6;P07203	A0A087WUQ6;P07203	9;9	9;9	9;9	Glutathione peroxidase;Glutathione peroxidase 1	GPX1	>tr|A0A087WUQ6|A0A087WUQ6_HUMAN Glutathione peroxidase OS=Homo sapiens GN=GPX1 PE=1 SV=1;>sp|P07203|GPX1_HUMAN Glutathione peroxidase 1 OS=Homo sapiens GN=GPX1 PE=1 SV=4	2	9	9	9	55.9	55.9	55.9	21.938	202	202;203	0	40.026	0.24904	0.98929	61.342	10	0	Median	1.0501	1.0745	6.8646	10	0	Median	4.2054	1.0445	52.771	10	0	Median	324690000	137170000	40946000	146570000				33	1918;2649;2723;3841;3934;7989;9777;10846;15435	True;True;True;True;True;True;True;True;True	1977;2731;2805;3945;4041;8217;10126;11230;15979	4454;6005;6159;6160;8529;8530;8708;18163;18164;18165;22249;24349;35250
E7ETK0;A0A087WUS0;P62847	E7ETK0;A0A087WUS0;P62847	6;6;6	6;6;6	6;6;6	40S ribosomal protein S24	RPS24	>tr|E7ETK0|E7ETK0_HUMAN 40S ribosomal protein S24 OS=Homo sapiens GN=RPS24 PE=1 SV=1;>tr|A0A087WUS0|A0A087WUS0_HUMAN 40S ribosomal protein S24 OS=Homo sapiens GN=RPS24 PE=1 SV=1;>sp|P62847|RS24_HUMAN 40S ribosomal protein S24 OS=Homo sapiens GN=RPS24 PE=1	3	6	6	6	36.6	36.6	36.6	15.197	131	131;132;133	0	20.808	0.23226	0.95558	15.767	10	0	Median	0.9851	0.99542	6.0186	10	0	Median	4.118	1.0239	18.738	10	0	Median	265020000	117110000	31942000	115970000				34	7136;9559;10636;13101;13102;13121	True;True;True;True;True;True	7335;9877;9878;11018;11019;13555;13556;13557;13578	15868;21746;21747;23939;23940;23941;29441;29442;29443;29444;29445;29446;29497;29498
A0A087WUT6;O60841	A0A087WUT6;O60841	5;5	5;5	5;5	Eukaryotic translation initiation factor 5B	EIF5B	>tr|A0A087WUT6|A0A087WUT6_HUMAN Eukaryotic translation initiation factor 5B OS=Homo sapiens GN=EIF5B PE=1 SV=1;>sp|O60841|IF2P_HUMAN Eukaryotic translation initiation factor 5B OS=Homo sapiens GN=EIF5B PE=1 SV=4	2	5	5	5	5.3	5.3	5.3	138.68	1220	1220;1220	0	19.191	0.22599	0.90781	23.417	4	0	Median	0.99051	0.99945	5.6641	4	0	Median	4.3328	1.1888	15.588	4	0	Median	75776000	34652000	8772000	32352000				35	1241;5299;8023;8314;8745	True;True;True;True;True	1289;5436;8252;8545;8993	2867;11703;18320;18321;19027;19028;19029;19030;19954
A0A087WUZ3;Q01082;F8W6C1;A4QPE4;O15020;P11277;E9PJZ2	A0A087WUZ3;Q01082	67;67;21;6;6;3;1	67;67;21;6;6;3;1	65;65;19;4;4;2;0	Spectrin beta chain, non-erythrocytic 1	SPTBN1	>tr|A0A087WUZ3|A0A087WUZ3_HUMAN Spectrin beta chain, non-erythrocytic 1 OS=Homo sapiens GN=SPTBN1 PE=1 SV=1;>sp|Q01082|SPTB2_HUMAN Spectrin beta chain, non-erythrocytic 1 OS=Homo sapiens GN=SPTBN1 PE=1 SV=2	7	67	67	65	34.3	34.3	33.3	274.83	2366	2366;2364;690;934;2390;2137;117	0	317.49	0.28858	0.99224	12.263	96	0	Median	0.92289	0.96071	8.2401	96	0	Median	3.2496	0.98099	15.016	96	0	Median	1445700000	631820000	217370000	596470000				36	467;843;1099;2029;2030;2043;2296;2360;2403;2473;2582;2613;2676;2937;3037;3187;3250;3353;3369;3522;3821;4846;5368;5426;5501;5651;5907;6192;6534;6684;6944;7060;7306;7307;7951;8132;8196;8197;8328;8597;8609;9027;9028;9070;9194;9195;9205;9471;9774;10623;10645;11449;11627;11921;12285;12306;12319;12988;12993;13011;13160;13420;13834;14003;14190;14355;15156	True;True;True;True;True;True;True;True;True;True;True;True;True;True;True;True;True;True;True;True;True;True;True;True;True;True;True;True;True;True;True;True;True;True;True;True;True;True;True;True;True;True;True;True;True;True;True;True;True;True;True;True;True;True;True;True;True;True;True;True;True;True;True;True;True;True;True	484;875;1138;2094;2095;2108;2365;2429;2430;2475;2551;2662;2693;2758;3027;3128;3281;3344;3448;3464;3619;3925;4974;5505;5567;5644;5796;6058;6352;6719;6872;7141;7257;7512;7513;8177;8362;8426;8427;8559;8841;8853;9283;9284;9328;9455;9456;9466;9772;10123;11004;11028;11856;12035;12335;12708;12730;12743;13442;13447;13465;13617;13885;14310;14494;14687;14862;15687	1002;1944;2559;2560;2561;2562;4706;4707;4726;4727;4728;4729;5228;5229;5230;5231;5362;5363;5444;5607;5608;5869;5935;5936;6061;6633;6634;6635;6830;6831;7107;7218;7219;7220;7475;7509;7830;7831;7832;8494;10727;10728;11830;12062;12313;12625;12626;12627;13175;13176;13886;13887;14682;14984;15499;15708;16364;16365;16366;18046;18047;18048;18585;18586;18587;18721;18722;18723;19058;19647;19648;19649;19650;1…
A0A087WUZ8;C9JJ19;P82930	A0A087WUZ8;C9JJ19;P82930	2;2;2	2;2;2	2;2;2	28S ribosomal protein S34, mitochondrial	MRPS34	>tr|A0A087WUZ8|A0A087WUZ8_HUMAN 28S ribosomal protein S34, mitochondrial OS=Homo sapiens GN=MRPS34 PE=1 SV=1;>tr|C9JJ19|C9JJ19_HUMAN 28S ribosomal protein S34, mitochondrial OS=Homo sapiens GN=MRPS34 PE=1 SV=2;>sp|P82930|RT34_HUMAN 28S ribosomal protein S3	3	2	2	2	8.5	8.5	8.5	20.662	176	176;225;218	0.00099602	1.869	0.28877	1.1826	21.32	2	0	Median	1.1119	1.1212	13.453	2	0	Median	3.8013	0.97274	7.6457	2	0	Median	42281000	18024000	5568100	18689000				37	7900;8543	True;True	8125;8786	17923;19521
A0A087WV05;Q99417	A0A087WV05;Q99417	2;2	2;2	2;2	C-Myc-binding protein	MYCBP	>tr|A0A087WV05|A0A087WV05_HUMAN Uncharacterized protein OS=Homo sapiens PE=4 SV=1;>sp|Q99417|MYCBP_HUMAN C-Myc-binding protein OS=Homo sapiens GN=MYCBP PE=1 SV=3	2	2	2	2	28.2	28.2	28.2	12.755	110	110;103	0	8.4703	0.25802	1.063	16.036	2	0	Median	1.0272	1.0326	8.1322	2	0	Median	3.9749	0.95037	13.527	2	0	Median	13742000	5779100	1547200	6415900				38	7405;14182	True;True	7619;14679	16629;32239
F8W7C6;A0A087WV22;X1WI28;P27635;H7C123;H7C2C5;Q96L21;B8A6G2;A6QRI9	F8W7C6;A0A087WV22;X1WI28;P27635;H7C123;H7C2C5;Q96L21	7;7;7;7;4;4;4;2;2	7;7;7;7;4;4;4;2;2	7;7;7;7;4;4;4;2;2	60S ribosomal protein L10;60S ribosomal protein L10-like	RPL10;RPL10L	>tr|F8W7C6|F8W7C6_HUMAN 60S ribosomal protein L10 OS=Homo sapiens GN=RPL10 PE=1 SV=2;>tr|A0A087WV22|A0A087WV22_HUMAN 60S ribosomal protein L10 OS=Homo sapiens GN=RPL10 PE=1 SV=1;>tr|X1WI28|X1WI28_HUMAN 60S ribosomal protein L10 (Fragment) OS=Homo sapiens G	9	7	7	7	38.7	38.7	38.7	18.565	163	163;178;201;214;91;131;214;108;181	0	27.173	0.20456	0.84737	23.009	10	0	Median	0.93928	0.98549	3.3311	10	0	Median	4.5851	1.1472	21.498	10	0	Median	384450000	171550000	47305000	165600000				39	2911;3855;3856;4168;5612;9538;13793	True;True;True;True;True;True;True	3001;3960;3961;4280;5757;9853;9854;14269	6573;8555;8556;8557;9146;9147;9148;9149;12542;21713;21714;21715;31150;31151;31152
Q5T123;A0A087WV23;Q9H299	Q5T123;A0A087WV23;Q9H299	2;2;2	2;2;2	2;2;2	SH3 domain-binding glutamic acid-rich-like protein 3	SH3BGRL3	>tr|Q5T123|Q5T123_HUMAN SH3 domain-binding glutamic acid-rich-like protein 3 OS=Homo sapiens GN=SH3BGRL3 PE=1 SV=1;>tr|A0A087WV23|A0A087WV23_HUMAN SH3 domain-binding glutamic acid-rich-like protein 3 OS=Homo sapiens GN=SH3BGRL3 PE=1 SV=1;>sp|Q9H299|SH3L3_H	3	2	2	2	33	33	33	9.3804	88	88;226;93	0	7.0576	0.24556	0.94428	16.229	4	0	Median	1.063	1.0451	2.3114	4	0	Median	4.4385	1.2334	18.191	4	0	Median	162940000	71800000	18152000	72985000				40	6399;14793	True;True	6573;6574;15316	14337;14338;14339;33789
A0A087WV29;Q9H0A0	A0A087WV29;Q9H0A0	2;2	2;2	2;2	N-acetyltransferase 10	NAT10	>tr|A0A087WV29|A0A087WV29_HUMAN N-acetyltransferase 10 OS=Homo sapiens GN=NAT10 PE=1 SV=1;>sp|Q9H0A0|NAT10_HUMAN N-acetyltransferase 10 OS=Homo sapiens GN=NAT10 PE=1 SV=2	2	2	2	2	2.2	2.2	2.2	93.533	834	834;1025	0.0040761	1.0966	0.27695	1.0421	1.0871	2	1	Median	1.0873	1.0038	0.58736	2	1	Median	4.1772	1.0785	4.0498	2	1	Median	13131000	5324400	1423400	6383500				41	556;6827	True;True	575;7019	1242;15257
A0A087WV66;P46013	A0A087WV66;P46013	4;4	4;4	4;4	Antigen KI-67	MKI67	>tr|A0A087WV66|A0A087WV66_HUMAN Antigen KI-67 OS=Homo sapiens GN=MKI67 PE=1 SV=1;>sp|P46013|KI67_HUMAN Antigen KI-67 OS=Homo sapiens GN=MKI67 PE=1 SV=2	2	4	4	4	2.4	2.4	2.4	358.62	3255	3255;3256	0	4.8539	0.36546	1.3676	26.615	10	10	Median	1.0326	0.83201	8.8276	10	10	Median	2.848	0.63877	27.666	10	10	Median	20051000	7858100	3479000	8714300				42	2240;7522;7526;13776	True;True;True;True	2309;7742;7746;14250	5116;5117;5118;5119;5120;5121;17000;17001;17016;31087
J3QS48;I3L295;J3KT75;J3QW43;J3QRD5;Q9H3L2;Q1HDL3;A0A087WV81;O75352;J3KSI4;I3L1D2;I3L4E0;J3KTK8;J3QQZ4;I3L405;I3L261	J3QS48;I3L295;J3KT75;J3QW43;J3QRD5;Q9H3L2;Q1HDL3;A0A087WV81;O75352;J3KSI4;I3L1D2;I3L4E0;J3KTK8;J3QQZ4	3;3;3;3;3;3;3;3;3;2;2;2;2;2;1;1	3;3;3;3;3;3;3;3;3;2;2;2;2;2;1;1	3;3;3;3;3;3;3;3;3;2;2;2;2;2;1;1	Mannose-P-dolichol utilization defect 1 protein	MPDU1;HBEBP2BPA	>tr|J3QS48|J3QS48_HUMAN Mannose-P-dolichol utilization defect 1 protein OS=Homo sapiens GN=MPDU1 PE=1 SV=1;>tr|I3L295|I3L295_HUMAN Mannose-P-dolichol utilization defect 1 protein OS=Homo sapiens GN=MPDU1 PE=1 SV=1;>tr|J3KT75|J3KT75_HUMAN Mannose-P-dolichol	16	3	3	3	33.7	33.7	33.7	10.978	101	101;109;154;192;194;211;299;299;247;52;61;75;116;152;54;61	0	5.4872	0.3304	1.3719	2.8908	3	0	Median	1.024	1.0396	4.9975	3	0	Median	3.1156	0.7607	7.8201	3	0	Median	35014000	14221000	4495000	16298000				43	52;4710;8389	True;True;True	54;4836;8622	84;10401;10402;19176;19177;19178;19179;19180;19181;19182;19183;19184;19185;19186;19187;19188;19189;19190
A0A087WVC1;Q9BQ39	A0A087WVC1;Q9BQ39	5;5	3;3	3;3	ATP-dependent RNA helicase DDX50	DDX50	>tr|A0A087WVC1|A0A087WVC1_HUMAN ATP-dependent RNA helicase DDX50 OS=Homo sapiens GN=DDX50 PE=1 SV=1;>sp|Q9BQ39|DDX50_HUMAN ATP-dependent RNA helicase DDX50 OS=Homo sapiens GN=DDX50 PE=1 SV=1	2	5	3	3	9.7	6	6	82.226	730	730;737	0	9.7245	0.27166	1.0823	38.334	5	3	Median	1.1296	1.0688	23.036	5	3	Median	6.2313	1.5658	22.888	5	3	Linear	17189000	8381200	1682500	7125600				44	2840;4229;5173;9841;12483	False;True;True;False;True	2926;4343;5308;10193;12915	6388;9319;11426;22361;28005;28006;28007
E5RGS7;H0YBP7;B3KPU0;A0A087WVI1;Q96JY6;A0A087WUQ1;C9JS55;H7C1D1	E5RGS7;H0YBP7;B3KPU0;A0A087WVI1;Q96JY6;A0A087WUQ1;C9JS55;H7C1D1	2;2;2;2;2;1;1;1	2;2;2;2;2;1;1;1	2;2;2;2;2;1;1;1	PDZ and LIM domain protein 2	PDLIM2	>tr|E5RGS7|E5RGS7_HUMAN Uncharacterized protein OS=Homo sapiens PE=4 SV=1;>tr|H0YBP7|H0YBP7_HUMAN Uncharacterized protein (Fragment) OS=Homo sapiens PE=1 SV=1;>tr|B3KPU0|B3KPU0_HUMAN PDZ and LIM domain protein 2 OS=Homo sapiens GN=PDLIM2 PE=1 SV=1;>tr|A0A0	8	2	2	2	24.2	24.2	24.2	14.434	132	132;141;146;325;352;72;254;291	0	17.676	0.31229	1.3506	7.6461	2	0	Median	1.1976	1.227	1.9571	2	0	Median	3.7995	0.89329	13.559	2	0	Median	14398000	5416600	2477800	6503900				45	4506;8324	True;True	4627;8555	9920;19052
A0A087WVM3;O00622	A0A087WVM3;O00622	2;2	2;2	2;2	Protein CYR61	CYR61	>tr|A0A087WVM3|A0A087WVM3_HUMAN Protein CYR61 OS=Homo sapiens GN=CYR61 PE=1 SV=1;>sp|O00622|CYR61_HUMAN Protein CYR61 OS=Homo sapiens GN=CYR61 PE=1 SV=1	2	2	2	2	6.3	6.3	6.3	41.839	379	379;381	0	3.7742	0.43262	1.6714	7.0301	2	1	Median	0.89382	0.8717	3.5418	2	1	Median	2.0366	0.50348	1.4578	2	1	Median	49098000	21856000	10315000	16926000				46	4688;6219	True;True	4814;6379	10350;13934
A0A087WVM4;B7ZM99;Q6UB35;Q4VXM0;Q4VXM1;H0Y327	A0A087WVM4;B7ZM99;Q6UB35	7;7;7;2;1;1	6;6;6;2;1;1	6;6;6;2;1;1	Monofunctional C1-tetrahydrofolate synthase, mitochondrial	MTHFD1L	>tr|A0A087WVM4|A0A087WVM4_HUMAN Monofunctional C1-tetrahydrofolate synthase, mitochondrial OS=Homo sapiens GN=MTHFD1L PE=1 SV=1;>tr|B7ZM99|B7ZM99_HUMAN MTHFD1L protein OS=Homo sapiens GN=MTHFD1L PE=1 SV=1;>sp|Q6UB35|C1TM_HUMAN Monofunctional C1-tetrahydrof	6	7	6	6	9.2	8.1	8.1	99.31	913	913;979;978;92;57;332	0	7.4006	0.21149	0.85658	9.5081	3	0	Median	0.95154	0.92011	5.7458	3	0	Median	4.5423	1.0991	6.6067	3	0	Median	45289000	20175000	5389100	19725000				47	1450;2094;2191;6552;7512;8701;14013	True;True;True;True;True;True;False	1502;2161;2260;6738;7731;8948;14504	3417;3418;4849;5037;14715;16957;19855;31894
A0A087WVQ6;Q00610;J3KS13;K7EJJ5;J3KRF5;J3KSQ2;J3QL20;F5H5N6;A0A087WV74;A0A087WXH4	A0A087WVQ6;Q00610	79;79;23;9;3;2;1;1;1;1	79;79;23;9;3;2;1;1;1;1	61;61;21;9;3;1;1;0;0;0	Clathrin heavy chain;Clathrin heavy chain 1	CLTC	>tr|A0A087WVQ6|A0A087WVQ6_HUMAN Clathrin heavy chain OS=Homo sapiens GN=CLTC PE=1 SV=1;>sp|Q00610|CLH1_HUMAN Clathrin heavy chain 1 OS=Homo sapiens GN=CLTC PE=1 SV=5	10	79	79	61	47.1	47.1	37.7	192.06	1679	1679;1675;612;222;131;122;97;169;369;463	0	323.31	0.27306	1.0267	14.707	138	0	Median	1.0303	0.9818	7.4293	138	0	Median	3.735	1.0102	14.985	138	0	Median	3493100000	1480300000	484880000	1528000000				48	260;500;683;914;1152;1208;1333;1759;1848;1955;2456;2705;2891;3199;3296;3315;3363;3364;3579;3827;3859;4925;4930;4931;5275;5282;5283;5455;5516;5909;6448;6449;6651;6728;6829;6870;6880;7201;7219;7309;7417;7592;7593;7878;8049;8273;8399;8590;9402;9985;10021;10022;10072;10081;10552;10608;10820;10902;10965;12145;12196;12813;13054;13055;13255;13368;13497;13785;13875;13950;14206;14252;14485;14654;14655;148…	True;True;True;True;True;True;True;True;True;True;True;True;True;True;True;True;True;True;True;True;True;True;True;True;True;True;True;True;True;True;True;True;True;True;True;True;True;True;True;True;True;True;True;True;True;True;True;True;True;True;True;True;True;True;True;True;True;True;True;True;True;True;True;True;True;True;True;True;True;True;True;True;True;True;True;True;True;True;True	266;517;518;710;947;1195;1255;1382;1816;1905;2016;2534;2787;2980;3293;3391;3410;3458;3459;3676;3931;3964;5055;5060;5061;5412;5419;5420;5596;5659;6060;6625;6626;6839;6917;7022;7064;7074;7403;7421;7516;7631;7812;7813;8103;8278;8503;8632;8833;9688;10341;10379;10380;10435;10444;10933;10989;11203;11286;11352;12562;12616;13260;13261;13508;13509;13717;13832;13963;14261;14358;14438;14703;14757;14996;1517…	507;508;1081;1082;1083;1084;1085;1086;1087;1088;1089;1090;1091;1092;1093;1094;1095;1096;1097;1098;1574;1575;1576;1577;2107;2108;2109;2110;2111;2112;2113;2114;2115;2116;2697;2698;2793;3114;4119;4280;4281;4512;5574;6117;6521;6522;7131;7132;7312;7407;7408;7500;7501;7502;7960;8504;8564;10905;10906;10907;10908;10909;10917;10918;10919;10920;10921;10922;10923;10924;11657;11658;11667;11668;12139;12140;12…
A0A087WWX0;A0A087WVZ9;P19388;A0A0A0MQR7;A0A087WVN5	A0A087WWX0;A0A087WVZ9;P19388;A0A0A0MQR7	3;3;3;2;1	3;3;3;2;1	3;3;3;2;1	DNA-directed RNA polymerases I, II, and III subunit RPABC1	POLR2E	>tr|A0A087WWX0|A0A087WWX0_HUMAN DNA-directed RNA polymerases I, II, and III subunit RPABC1 (Fragment) OS=Homo sapiens GN=POLR2E PE=1 SV=1;>tr|A0A087WVZ9|A0A087WVZ9_HUMAN DNA-directed RNA polymerases I, II, and III subunit RPABC1 OS=Homo sapiens GN=POLR2E P	5	3	3	3	20.1	20.1	20.1	15.421	134	134;184;210;204;83	0	2.7895	0.20898	0.83678	5.7113	4	0	Median	1.0082	0.99552	6.3104	4	0	Median	4.6646	1.202	6.5156	4	0	Median	64370000	28397000	6563900	29409000				49	6001;6335;9585	True;True;True	6154;6508;9911;9912	13403;13404;14181;21840;21841;21842
A0A087WW66;Q99460;H7C378;H7BZR6;C9J9M4	A0A087WW66;Q99460	13;13;5;2;2	13;13;5;2;2	13;13;5;2;2	26S proteasome non-ATPase regulatory subunit 1	PSMD1	>tr|A0A087WW66|A0A087WW66_HUMAN 26S proteasome non-ATPase regulatory subunit 1 OS=Homo sapiens GN=PSMD1 PE=1 SV=1;>sp|Q99460|PSMD1_HUMAN 26S proteasome non-ATPase regulatory subunit 1 OS=Homo sapiens GN=PSMD1 PE=1 SV=2	5	13	13	13	20.7	20.7	20.7	105.85	953	953;953;192;164;203	0	61.638	0.24075	0.9742	10.692	12	0	Median	0.99379	0.96937	11.894	12	0	Median	4.297	1.0464	9.0253	12	0	Median	213140000	92539000	27698000	92906000				50	204;2713;5712;6994;8233;9391;9726;10411;12661;12916;12925;13867;14491	True;True;True;True;True;True;True;True;True;True;True;True;True	209;2795;5859;7191;8463;9674;10074;10787;13099;13370;13379;14349;14350;15002	378;379;380;381;6135;12747;15581;18805;18806;21406;22159;23512;28419;29069;29080;29081;31420;31421;33006
A0A087WW77;Q15334	A0A087WW77;Q15334	3;3	3;3	3;3	Lethal(2) giant larvae protein homolog 1	LLGL1	>tr|A0A087WW77|A0A087WW77_HUMAN Lethal(2) giant larvae protein homolog 1 OS=Homo sapiens GN=LLGL1 PE=1 SV=1;>sp|Q15334|L2GL1_HUMAN Lethal(2) giant larvae protein homolog 1 OS=Homo sapiens GN=LLGL1 PE=1 SV=3	2	3	3	3	3.8	3.8	3.8	114.43	1056	1056;1064	0	17.097	0.22249	0.88464	7.7977	4	2	Median	1.2503	1.209	11.125	4	2	Median	5.5101	1.3897	8.285	4	2	Median	24410000	9358800	2567700	12483000				51	1283;9906;12559	True;True;True	1331;10259;12993	2960;2961;22477;28153
A0A087WWE7;Q8N0T1	A0A087WWE7;Q8N0T1	1;1	1;1	1;1	Uncharacterized protein C8orf59	C8orf59	>tr|A0A087WWE7|A0A087WWE7_HUMAN Uncharacterized protein C8orf59 OS=Homo sapiens GN=C8orf59 PE=1 SV=1;>sp|Q8N0T1|CH059_HUMAN Uncharacterized protein C8orf59 OS=Homo sapiens GN=C8orf59 PE=1 SV=4	2	1	1	1	21.3	21.3	21.3	6.9511	61	61;100	0	2.1258	NaN	NaN	NaN	1	0	Median	NaN	NaN	NaN	1	0	Median	NaN	NaN	NaN	1	0	Median	2147700	855680	263360	1028700				52	5290	TRUE	5427	11686
C9IZD2;C9J8Z7;C9JLE1;C9JHC7;F8W8R3;A0A087WWF6;P49005	C9IZD2;C9J8Z7;C9JLE1;C9JHC7;F8W8R3;A0A087WWF6;P49005	1;1;1;1;1;1;1	1;1;1;1;1;1;1	1;1;1;1;1;1;1	DNA polymerase delta subunit 2	POLD2	>tr|C9IZD2|C9IZD2_HUMAN DNA polymerase delta subunit 2 (Fragment) OS=Homo sapiens GN=POLD2 PE=1 SV=1;>tr|C9J8Z7|C9J8Z7_HUMAN DNA polymerase delta subunit 2 (Fragment) OS=Homo sapiens GN=POLD2 PE=1 SV=1;>tr|C9JLE1|C9JLE1_HUMAN DNA polymerase delta subunit 2	7	1	1	1	9.5	9.5	9.5	16.856	148	148;155;220;257;455;504;469	0.00099305	1.8346	NaN	NaN	NaN	1	0	Median	NaN	NaN	NaN	1	0	Median	NaN	NaN	NaN	1	0	Median	18995000	8364100	2490100	8140300				53	14335	TRUE	14842	32652
A0A087WWM0;O43617;A0A087WYS5;A6NKE1	A0A087WWM0;O43617;A0A087WYS5	3;3;2;1	3;3;2;1	3;3;2;1	Trafficking protein particle complex subunit 3	TRAPPC3	>tr|A0A087WWM0|A0A087WWM0_HUMAN Trafficking protein particle complex subunit 3 OS=Homo sapiens GN=TRAPPC3 PE=1 SV=1;>sp|O43617|TPPC3_HUMAN Trafficking protein particle complex subunit 3 OS=Homo sapiens GN=TRAPPC3 PE=1 SV=1;>tr|A0A087WYS5|A0A087WYS5_HUMAN T	4	3	3	3	18.1	18.1	18.1	21.231	188	188;180;114;118	0	5.1853	0.25834	1.0532	2.2851	5	0	Median	1.0345	1.0519	4.3113	5	0	Median	4.0066	0.99899	6.5971	5	0	Median	50694000	21361000	6254900	23079000				54	4096;7925;10879	True;True;True	4206;8150;11263	9002;18003;18004;24482;24483
H0YNS9;H0YLB8;H0YNH0;H0YMB3;H0YLV5;A0A087WWM4;F8WAN9;H0YNJ6;Q9P2T1	H0YNS9;H0YLB8;H0YNH0;H0YMB3;H0YLV5;A0A087WWM4;F8WAN9;H0YNJ6;Q9P2T1	1;1;1;1;1;1;1;1;1	1;1;1;1;1;1;1;1;1	1;1;1;1;1;1;1;1;1	GMP reductase;GMP reductase 2	GMPR2	>tr|H0YNS9|H0YNS9_HUMAN GMP reductase 2 (Fragment) OS=Homo sapiens GN=GMPR2 PE=1 SV=5;>tr|H0YLB8|H0YLB8_HUMAN GMP reductase 2 (Fragment) OS=Homo sapiens GN=GMPR2 PE=1 SV=1;>tr|H0YNH0|H0YNH0_HUMAN GMP reductase 2 (Fragment) OS=Homo sapiens GN=GMPR2 PE=1 SV=	9	1	1	1	9.5	9.5	9.5	12.851	126	126;169;240;315;333;348;349;427;348	0.0070703	0.95426	0.23518	0.84098	1.2371	2	2	Median	1.2125	1.1852	5.2657	2	2	Median	5.1557	1.3858	6.5027	2	2	Median	25199000	9279300	3012500	12907000				55	13731	TRUE	14205	30981;30982
A0A087WWP4;Q96T37	A0A087WWP4;Q96T37	1;1	1;1	1;1	Putative RNA-binding protein 15	RBM15	>tr|A0A087WWP4|A0A087WWP4_HUMAN Putative RNA-binding protein 15 OS=Homo sapiens GN=RBM15 PE=1 SV=1;>sp|Q96T37|RBM15_HUMAN Putative RNA-binding protein 15 OS=Homo sapiens GN=RBM15 PE=1 SV=2	2	1	1	1	1.8	1.8	1.8	102.13	933	933;977	0	4.593	NaN	NaN	NaN	1	0	Median	NaN	NaN	NaN	1	0	Median	NaN	NaN	NaN	1	0	Median	3122300	1332400	357190	1432700				56	9250	TRUE	9514	21112
A0A087X235;A0A087WWT4;Q9H1Z9	A0A087X235;A0A087WWT4;Q9H1Z9	1;1;1	1;1;1	1;1;1	Tetraspanin;Tetraspanin-10	TSPAN10	>tr|A0A087X235|A0A087X235_HUMAN Tetraspanin OS=Homo sapiens GN=TSPAN10 PE=1 SV=1;>tr|A0A087WWT4|A0A087WWT4_HUMAN Tetraspanin OS=Homo sapiens GN=TSPAN10 PE=1 SV=1;>sp|Q9H1Z9|TSN10_HUMAN Tetraspanin-10 OS=Homo sapiens GN=TSPAN10 PE=2 SV=1	3	1	1	1	2.3	2.3	2.3	36.644	355	355;393;355	0.00050226	1.9531	0.27685	1.0671	3.0344	2	1	Median	0.97461	0.96665	0.064943	2	1	Median	3.5017	0.91335	0.56594	2	1	Median	16010000	6587400	2097900	7324800				57	8210	TRUE	8440	18753;18754
A0A087WWU8;Q5HYB6;D6R904;Q5VU61;K7EP68;D6RFM2	A0A087WWU8;Q5HYB6;D6R904;Q5VU61	18;15;13;12;7;4	11;10;7;8;0;4	7;7;7;4;0;4		TPM3;DKFZp686J1372	>tr|A0A087WWU8|A0A087WWU8_HUMAN Tropomyosin alpha-3 chain OS=Homo sapiens GN=TPM3 PE=1 SV=1;>tr|Q5HYB6|Q5HYB6_HUMAN Epididymis luminal protein 189 OS=Homo sapiens GN=DKFZp686J1372 PE=1 SV=1;>tr|D6R904|D6R904_HUMAN Tropomyosin alpha-3 chain OS=Homo sapiens	6	18	11	7	60.4	38.8	19.4	26.42	227	227;232;95;223;138;49	0	58.869	0.28786	1.1209	9.4185	17	0	Median	0.92441	0.97899	7.4834	17	0	Median	3.108	0.88885	9.2133	17	0	Median	1235200000	558160000	171220000	505790000				58	580;581;980;1393;1394;3217;5329;6376;6377;6395;6976;7072;7425;7426;7569;8405;10891;12630	True;True;True;True;True;True;False;False;False;True;True;True;False;False;False;True;False;True	600;601;1013;1443;1444;3311;5466;6550;6551;6569;7173;7269;7639;7640;7789;8639;11275;13067	1282;1283;2254;2255;3249;3250;3251;3252;7159;11756;11757;11758;14275;14276;14277;14278;14279;14332;15551;15552;15728;15729;16683;16684;16685;17096;17097;17098;19244;24501;24502;28357;28358
A0A087WWU9;P09132;A0A087WYR0;D6RBG4	A0A087WWU9;P09132;A0A087WYR0	3;3;2;1	3;3;2;1	3;3;2;1	Signal recognition particle 19 kDa protein	SRP19	>tr|A0A087WWU9|A0A087WWU9_HUMAN HCG2039564, isoform CRA_a OS=Homo sapiens GN=SRP19 PE=1 SV=1;>sp|P09132|SRP19_HUMAN Signal recognition particle 19 kDa protein OS=Homo sapiens GN=SRP19 PE=1 SV=3;>tr|A0A087WYR0|A0A087WYR0_HUMAN Signal recognition particle 19	4	3	3	3	57.7	57.7	57.7	11.85	104	104;144;120;43	0	8.7152	0.25897	1.1507	21.713	4	2	Median	1.0053	1.0684	3.3921	4	2	Median	3.8989	0.90322	19.12	4	2	Median	26388000	11257000	2896200	12235000				59	1696;10449;11797	True;True;True	1752;10827;12209	3963;23580;26521;26522
A0A087WX59;Q16186;A0A087WUX6	A0A087WX59;Q16186;A0A087WUX6	2;2;1	2;2;1	2;2;1	Proteasomal ubiquitin receptor ADRM1	ADRM1	>tr|A0A087WX59|A0A087WX59_HUMAN Proteasomal ubiquitin receptor ADRM1 OS=Homo sapiens GN=ADRM1 PE=1 SV=1;>sp|Q16186|ADRM1_HUMAN Proteasomal ubiquitin receptor ADRM1 OS=Homo sapiens GN=ADRM1 PE=1 SV=2;>tr|A0A087WUX6|A0A087WUX6_HUMAN Proteasomal ubiquitin rec	3	2	2	2	8.4	8.4	8.4	37.504	368	368;407;141	0	4.4666	0.27193	0.99363	19.519	2	0	Median	0.99331	1.0038	1.4991	2	0	Median	3.6748	1.0053	11.644	2	0	Median	36299000	16502000	4553300	15244000				60	11927;13130	True;True	12341;13587	26798;29520
A0A087WX97;Q9BXK5;H0Y3R5;E9PDD6;A0A087WTL4	A0A087WX97;Q9BXK5;H0Y3R5;E9PDD6;A0A087WTL4	2;2;1;1;1	2;2;1;1;1	2;2;1;1;1	Bcl-2-like protein 13	BCL2L13	>tr|A0A087WX97|A0A087WX97_HUMAN Bcl-2-like protein 13 OS=Homo sapiens GN=BCL2L13 PE=1 SV=1;>sp|Q9BXK5|B2L13_HUMAN Bcl-2-like protein 13 OS=Homo sapiens GN=BCL2L13 PE=1 SV=1;>tr|H0Y3R5|H0Y3R5_HUMAN Bcl-2-like protein 13 (Fragment) OS=Homo sapiens GN=BCL2L13	5	2	2	2	3.9	3.9	3.9	54.388	509	509;485;38;171;461	0	3.3113	0.21257	0.80607	12	2	1	Median	1.1279	1.0988	2.7282	2	1	Median	5.1487	1.3272	17.238	2	1	Median	26120000	10835000	2323900	12961000				61	6212;14482	True;True	6372;14993	13920;32975
Q8N1B9;C9J6X0;A0A087WXC5;E7ESZ7;O95299	Q8N1B9;C9J6X0;A0A087WXC5;E7ESZ7;O95299	2;2;2;2;2	2;2;2;2;2	2;2;2;2;2	NADH dehydrogenase [ubiquinone] 1 alpha subcomplex subunit 10, mitochondrial	NDUFA10	>tr|Q8N1B9|Q8N1B9_HUMAN NADH dehydrogenase (Ubiquinone) 1 alpha subcomplex, 10, 42kDa, isoform CRA_c OS=Homo sapiens GN=NDUFA10 PE=1 SV=1;>tr|C9J6X0|C9J6X0_HUMAN NADH dehydrogenase [ubiquinone] 1 alpha subcomplex subunit 10, mitochondrial (Fragment) OS=Hom	5	2	2	2	16.9	16.9	16.9	22.373	201	201;245;355;390;355	0.00098961	1.7815	0.2512	0.93366	3.2091	2	1	Median	1.4121	1.3787	31.84	2	1	Median	5.6785	1.4638	33.338	2	1	Median	32573000	11657000	3386500	17529000				62	8342;13896	True;True	8573;14380	19087;31511
A0A087WXM6;J3QQT2;J3KRX5;A0A0A6YYL6;P18621;J3KRB3;A0A087WWH0;J3QS96;J3QLC8;A0A0A0MRF8;A0A087WY81;J3KSJ0	A0A087WXM6;J3QQT2;J3KRX5;A0A0A6YYL6;P18621;J3KRB3;A0A087WWH0;J3QS96;J3QLC8;A0A0A0MRF8;A0A087WY81	8;8;8;8;8;7;7;7;6;6;5;3	8;8;8;8;8;7;7;7;6;6;5;3	8;8;8;8;8;7;7;7;6;6;5;3	60S ribosomal protein L17	RPL17;RPL17-C18orf32	>tr|A0A087WXM6|A0A087WXM6_HUMAN 60S ribosomal protein L17 (Fragment) OS=Homo sapiens GN=RPL17 PE=1 SV=1;>tr|J3QQT2|J3QQT2_HUMAN 60S ribosomal protein L17 (Fragment) OS=Homo sapiens GN=RPL17 PE=1 SV=1;>tr|J3KRX5|J3KRX5_HUMAN 60S ribosomal protein L17 (Fragm	12	8	8	8	42.6	42.6	42.6	19.586	169	169;171;174;228;184;129;132;138;174;190;98;56	0	32.685	0.26231	1.0548	10.099	9	0	Median	0.97555	1.0122	10.436	9	0	Median	3.469	0.96504	20.098	9	0	Median	327240000	142530000	39911000	144790000				63	3228;4681;4682;10770;11052;14428;15201;15369	True;True;True;True;True;True;True;True	3322;4807;4808;11153;11444;14937;15732;15913	7178;7179;10339;10340;10341;24210;24841;32844;34695;34696;34697;34698;35102
A0A087WXM8;P50895;K7ENU8	A0A087WXM8;P50895;K7ENU8	5;5;3	5;5;3	5;5;3	Basal cell adhesion molecule	BCAM	>tr|A0A087WXM8|A0A087WXM8_HUMAN Basal cell adhesion molecule OS=Homo sapiens GN=BCAM PE=1 SV=1;>sp|P50895|BCAM_HUMAN Basal cell adhesion molecule OS=Homo sapiens GN=BCAM PE=1 SV=2;>tr|K7ENU8|K7ENU8_HUMAN Basal cell adhesion molecule (Fragment) OS=Homo sapi	3	5	5	5	10.5	10.5	10.5	63.693	588	588;628;291	0	10.905	0.28704	1.1316	5.8734	3	0	Median	1.015	1.0036	7.7633	3	0	Median	3.464	0.86801	2.7713	3	0	Median	89855000	38758000	14287000	36810000				64	2847;8919;8922;11850;13423	True;True;True;True;True	2934;9169;9172;12263;13888	6402;6403;6404;6405;20344;20352;26656;26657;30224;30225
A0A087WXP3;E9PEE8;P18564	A0A087WXP3;E9PEE8;P18564	1;1;1	1;1;1	1;1;1	Integrin beta;Integrin beta-6	ITGB6	>tr|A0A087WXP3|A0A087WXP3_HUMAN Integrin beta OS=Homo sapiens GN=ITGB6 PE=1 SV=1;>tr|E9PEE8|E9PEE8_HUMAN Integrin beta OS=Homo sapiens GN=ITGB6 PE=1 SV=1;>sp|P18564|ITB6_HUMAN Integrin beta-6 OS=Homo sapiens GN=ITGB6 PE=1 SV=2	3	1	1	1	1.3	1.3	1.3	75.849	693	693;746;788	0.00099404	1.8363	0.1521	0.62145	42.366	6	5	Median	1.0083	0.95294	21.091	6	5	Median	7.0492	1.7201	59.667	6	5	Median	217890000	100110000	18906000	98877000				65	7757	TRUE	7980	17610;17611;17612;17613;17614;17615
A0A087WXS7;O43681;K7ERW9	A0A087WXS7;O43681	3;3;1	3;3;1	3;3;1	ATPase ASNA1	ASNA1	>tr|A0A087WXS7|A0A087WXS7_HUMAN ATPase ASNA1 OS=Homo sapiens GN=ASNA1 PE=1 SV=1;>sp|O43681|ASNA_HUMAN ATPase ASNA1 OS=Homo sapiens GN=ASNA1 PE=1 SV=2	3	3	3	3	10.6	10.6	10.6	37.119	331	331;348;200	0	5.0041	0.35887	1.3339	34.43	4	2	Median	1.0163	0.99337	5.7609	4	2	Median	2.8922	0.74554	32.946	4	2	Median	125390000	51908000	18692000	54786000				66	8291;8547;15183	True;True;True	8522;8790;15714	18975;19525;34664;34665
H7BXI1;A0A087WXU3;A0FGR8	H7BXI1;A0A087WXU3;A0FGR8	3;3;3	3;3;3	3;3;3	Extended synaptotagmin-2	ESYT2	>tr|H7BXI1|H7BXI1_HUMAN Extended synaptotagmin-2 (Fragment) OS=Homo sapiens GN=ESYT2 PE=1 SV=1;>tr|A0A087WXU3|A0A087WXU3_HUMAN Extended synaptotagmin-2 OS=Homo sapiens GN=ESYT2 PE=1 SV=1;>sp|A0FGR8|ESYT2_HUMAN Extended synaptotagmin-2 OS=Homo sapiens GN=ES	3	3	3	3	3.7	3.7	3.7	98.008	884	884;921;921	0	13.952	0.24352	0.99452	10.167	2	1	Median	0.98783	0.96217	3.5536	2	1	Median	4.1018	1.006	15.294	2	1	Median	7770000	3299400	1021000	3449600				67	6590;13526;13754	True;True;True	6778;13992;14228	14786;30459;31044
A0A087WY55;Q9NP79;Q5TGM0	A0A087WY55;Q9NP79	3;3;1	3;3;1	3;3;1	Vacuolar protein sorting-associated protein VTA1 homolog	VTA1	>tr|A0A087WY55|A0A087WY55_HUMAN Chromosome 6 open reading frame 55, isoform CRA_b OS=Homo sapiens GN=VTA1 PE=1 SV=1;>sp|Q9NP79|VTA1_HUMAN Vacuolar protein sorting-associated protein VTA1 homolog OS=Homo sapiens GN=VTA1 PE=1 SV=1	3	3	3	3	11.8	11.8	11.8	31.102	280	280;307;249	0.0018975	1.3773	0.23894	0.99113	25.03	4	0	Median	0.99331	0.91427	7.6685	4	0	Median	3.9137	0.90895	18.45	4	0	Median	97694000	42506000	11704000	43485000				68	96;1644;8404	True;True;True	99;1698;8638	165;166;3832;19243
Q6ICJ4;A0A087WY67;P0CG30;P0CG29;P30711	Q6ICJ4;A0A087WY67;P0CG30;P0CG29;P30711	2;2;2;2;1	2;2;2;2;1	2;2;2;2;1	Glutathione S-transferase theta-2B;Glutathione S-transferase theta-2;Glutathione S-transferase theta-1	Em:AP000351.3;GSTT2;GSTT2B;GSTT1	>tr|Q6ICJ4|Q6ICJ4_HUMAN Em:AP000351.3 protein OS=Homo sapiens GN=Em:AP000351.3 PE=1 SV=1;>tr|A0A087WY67|A0A087WY67_HUMAN Glutathione S-transferase theta-2 OS=Homo sapiens GN=GSTT2 PE=3 SV=1;>sp|P0CG30|GSTT2_HUMAN Glutathione S-transferase theta-2B OS=Homo	5	2	2	2	10	10	10	25.948	230	230;243;244;244;240	0.0014613	1.6455	0.16782	0.68541	6.027	2	0	Median	1.0127	1.0389	6.0282	2	0	Median	5.8645	1.494	11.092	2	0	Median	31874000	13565000	2847800	15461000				69	1815;12807	True;True	1872;13254	4221;28765
A0A087WY71;E9PFW3;Q96CW1;C9JTK4;C9JGT8;C9JJ47;C9JJD3;C9JPV8	A0A087WY71;E9PFW3;Q96CW1;C9JTK4;C9JGT8;C9JJ47	3;3;3;2;2;2;1;1	3;3;3;2;2;2;1;1	3;3;3;2;2;2;1;1	AP-2 complex subunit mu	AP2M1	>tr|A0A087WY71|A0A087WY71_HUMAN AP-2 complex subunit mu OS=Homo sapiens GN=AP2M1 PE=1 SV=1;>tr|E9PFW3|E9PFW3_HUMAN AP-2 complex subunit mu OS=Homo sapiens GN=AP2M1 PE=1 SV=1;>sp|Q96CW1|AP2M1_HUMAN AP-2 complex subunit mu OS=Homo sapiens GN=AP2M1 PE=1 SV=2;	8	3	3	3	6.2	6.2	6.2	49.526	434	434;460;435;160;195;252;113;136	0.00050505	1.9766	0.24332	0.91395	22.843	3	1	Median	1.098	1.0987	7.4066	3	1	Median	4.7617	1.2418	22.182	3	1	Median	54911000	22716000	7162100	25033000				70	8499;11873;12473	True;True;True	8741;12287;12905	19439;26692;27988
A0A087WY82;Q9Y624	A0A087WY82;Q9Y624	1;1	1;1	1;1	Junctional adhesion molecule A	F11R	>tr|A0A087WY82|A0A087WY82_HUMAN Junctional adhesion molecule A OS=Homo sapiens GN=F11R PE=1 SV=1;>sp|Q9Y624|JAM1_HUMAN Junctional adhesion molecule A OS=Homo sapiens GN=F11R PE=1 SV=1	2	1	1	1	4.3	4.3	4.3	30.197	279	279;299	0.00098328	1.7348	NaN	NaN	NaN	1	1	Median	NaN	NaN	NaN	1	1	Median	NaN	NaN	NaN	1	1	Median	10558000	4314000	858840	5385700				71	8790	TRUE	9038	20046
A0A087WYC0;A0A0C4DGS5;Q08379	A0A087WYC0;A0A0C4DGS5;Q08379	1;1;1	1;1;1	1;1;1	Golgin subfamily A member 2	GOLGA2	>tr|A0A087WYC0|A0A087WYC0_HUMAN Golgin subfamily A member 2 OS=Homo sapiens GN=GOLGA2 PE=1 SV=1;>tr|A0A0C4DGS5|A0A0C4DGS5_HUMAN Golgi autoantigen, golgin subfamily a, 2, isoform CRA_a OS=Homo sapiens GN=GOLGA2 PE=1 SV=1;>sp|Q08379|GOGA2_HUMAN Golgin subfam	3	1	1	1	3.5	3.5	3.5	31.894	286	286;990;1002	0	2.3051	NaN	NaN	NaN	1	1	Median	NaN	NaN	NaN	1	1	Median	NaN	NaN	NaN	1	1	Median	2191800	691160	226240	1274400				72	8173	TRUE	8403	18671
F5H2F2;A0A087WYF2;P54687	F5H2F2;A0A087WYF2;P54687	1;1;1	1;1;1	1;1;1	Branched-chain-amino-acid aminotransferase, cytosolic	BCAT1	>tr|F5H2F2|F5H2F2_HUMAN Branched-chain-amino-acid aminotransferase, cytosolic (Fragment) OS=Homo sapiens GN=BCAT1 PE=1 SV=1;>tr|A0A087WYF2|A0A087WYF2_HUMAN Branched-chain-amino-acid aminotransferase, cytosolic (Fragment) OS=Homo sapiens GN=BCAT1 PE=1 SV=1;	3	1	1	1	13.9	13.9	13.9	16.519	144	144;225;386	0	3.7556	NaN	NaN	NaN	1	0	Median	NaN	NaN	NaN	1	0	Median	NaN	NaN	NaN	1	0	Median	14568000	7054500	999390	6513900				73	1604	TRUE	1658	3762
F5H7V1;G3V1R5;A0A087WYK8;B1AKJ5;O43847	F5H7V1;G3V1R5;A0A087WYK8;B1AKJ5;O43847	2;2;2;2;2	2;2;2;2;2	2;2;2;2;2	Nardilysin	NRD1	>tr|F5H7V1|F5H7V1_HUMAN Nardilysin OS=Homo sapiens GN=NRD1 PE=1 SV=2;>tr|G3V1R5|G3V1R5_HUMAN Nardilysin OS=Homo sapiens GN=NRD1 PE=1 SV=1;>tr|A0A087WYK8|A0A087WYK8_HUMAN Nardilysin OS=Homo sapiens GN=NRD1 PE=1 SV=1;>tr|B1AKJ5|B1AKJ5_HUMAN Nardilysin OS=Hom	5	2	2	2	1.8	1.8	1.8	108.71	949	949;1087;1148;1219;1150	0.0014451	1.5297	0.29179	1.1604	30.198	2	2	Median	1.1455	1.0557	4.1489	2	2	Median	3.9259	0.88123	26.049	2	2	Median	6581500	2362600	1141600	3077300				74	4996;13174	True;True	5128;13631	11075;29591
A0A087WYP2;Q8IZQ5;H0YE28;H3BV83	A0A087WYP2;Q8IZQ5;H0YE28	4;4;3;1	4;4;3;1	4;4;3;1	Selenoprotein H	C11orf31;SELH	>tr|A0A087WYP2|A0A087WYP2_HUMAN Selenoprotein H OS=Homo sapiens GN=C11orf31 PE=1 SV=1;>sp|Q8IZQ5|SELH_HUMAN Selenoprotein H OS=Homo sapiens GN=SELH PE=1 SV=2;>tr|H0YE28|H0YE28_HUMAN Selenoprotein H (Fragment) OS=Homo sapiens GN=C11orf31 PE=1 SV=1	4	4	4	4	37.2	37.2	37.2	13.303	121	121;122;94;18	0	15.101	0.25993	1.0844	8.0005	4	0	Median	0.90628	0.94748	2.0414	4	0	Median	3.6288	0.87257	11.026	4	0	Median	77688000	35601000	10213000	31874000				75	3886;6759;9694;9695	True;True;True;True	3991;6949;10039;10040	8608;15115;15116;22075;22076
A0A087WYR3;O43399;A0A087WZ51	A0A087WYR3;O43399;A0A087WZ51	6;6;4	6;6;4	6;6;4	Tumor protein D54	TPD52L2	>tr|A0A087WYR3|A0A087WYR3_HUMAN Tumor protein D54 OS=Homo sapiens GN=TPD52L2 PE=1 SV=1;>sp|O43399|TPD54_HUMAN Tumor protein D54 OS=Homo sapiens GN=TPD52L2 PE=1 SV=2;>tr|A0A087WZ51|A0A087WZ51_HUMAN Tumor protein D54 OS=Homo sapiens GN=TPD52L2 PE=1 SV=1	3	6	6	6	34.2	34.2	34.2	23.764	222	222;206;152	0	34.993	0.28154	1.1307	13.103	8	0	Median	1.1152	1.1393	5.6471	8	0	Median	3.8054	0.95043	12.008	8	0	Median	284760000	130100000	33677000	120990000				76	4749;7809;7810;9375;12235;13027	True;True;True;True;True;True	4875;8032;8033;9653;12655;13481	10499;10500;17726;17727;17728;17729;21366;27438;29295;29296
A0A087WYS1;E7EUC7;Q16851;C9JNZ1;C9JWG0;C9JVG3;C9JQU9;C9JTZ5;C9JUW1	A0A087WYS1;E7EUC7;Q16851;C9JNZ1	8;8;8;4;3;3;3;2;2	8;8;8;4;3;3;3;2;2	8;8;8;4;3;3;3;2;2	UTP--glucose-1-phosphate uridylyltransferase	UGP2	>tr|A0A087WYS1|A0A087WYS1_HUMAN UTP--glucose-1-phosphate uridylyltransferase OS=Homo sapiens GN=UGP2 PE=1 SV=1;>tr|E7EUC7|E7EUC7_HUMAN UTP--glucose-1-phosphate uridylyltransferase OS=Homo sapiens GN=UGP2 PE=1 SV=1;>sp|Q16851|UGPA_HUMAN UTP--glucose-1-phosp	9	8	8	8	20.1	20.1	20.1	56.967	508	508;517;508;213;150;171;175;105;135	0	24.207	0.17152	0.71045	12.594	6	0	Median	0.9347	0.91974	5.7427	6	0	Median	5.3793	1.3133	23.671	6	0	Median	542170000	256530000	48623000	237020000				77	2825;4756;6387;6742;9081;9797;11269;12748	True;True;True;True;True;True;True;True	2911;4882;6561;6932;9339;10147;11669;13189	6368;10507;14314;15086;20709;22284;22285;25285;28632
A0A087WYT3;Q15185;B4DDC6	A0A087WYT3;Q15185	5;5;1	5;5;1	5;5;1	Prostaglandin E synthase 3	PTGES3	>tr|A0A087WYT3|A0A087WYT3_HUMAN Prostaglandin E synthase 3 OS=Homo sapiens GN=PTGES3 PE=1 SV=1;>sp|Q15185|TEBP_HUMAN Prostaglandin E synthase 3 OS=Homo sapiens GN=PTGES3 PE=1 SV=1	3	5	5	5	31.1	31.1	31.1	19.155	164	164;160;124	0	32.259	0.252	1.0305	12.553	5	0	Median	1.0412	1.0683	4.6746	5	0	Median	4.064	0.99228	11.954	5	0	Median	407190000	177470000	47456000	182270000				78	5373;8497;8960;11453;11529	True;True;True;True;True	5511;8739;9213;11860;11937	11839;11840;19435;19436;20432;20433;25675;25676;25868;25869;25870;25871
A0A087WZ13;E9PAU2;Q8IY67;K7EKR9	A0A087WZ13;E9PAU2;Q8IY67	5;5;5;1	5;5;5;1	5;5;5;1	Ribonucleoprotein PTB-binding 1	RAVER1	>tr|A0A087WZ13|A0A087WZ13_HUMAN Ribonucleoprotein PTB-binding 1 OS=Homo sapiens GN=RAVER1 PE=1 SV=1;>tr|E9PAU2|E9PAU2_HUMAN Ribonucleoprotein PTB-binding 1 OS=Homo sapiens GN=RAVER1 PE=1 SV=1;>sp|Q8IY67|RAVR1_HUMAN Ribonucleoprotein PTB-binding 1 OS=Homo s	4	5	5	5	10.1	10.1	10.1	77.843	739	739;756;606;96	0	9.5487	0.24932	1.0184	7.2136	4	0	Median	0.91456	0.92644	10.814	4	0	Median	3.6262	0.88656	4.9296	4	0	Median	43035000	18426000	6196500	18413000				79	5029;11146;11302;11734;14450	True;True;True;True;True	5161;11541;11703;12144;14960	11137;25037;25338;26392;26393;26394;32900
A0A087WZE9;P05204;Q15651	A0A087WZE9;P05204;Q15651	1;1;1	1;1;1	1;1;1	Non-histone chromosomal protein HMG-17;High mobility group nucleosome-binding domain-containing protein 3	HMGN3;HMGN2	>tr|A0A087WZE9|A0A087WZE9_HUMAN High mobility group nucleosome-binding domain-containing protein 3 OS=Homo sapiens GN=HMGN3 PE=1 SV=1;>sp|P05204|HMGN2_HUMAN Non-histone chromosomal protein HMG-17 OS=Homo sapiens GN=HMGN2 PE=1 SV=3;>sp|Q15651|HMGN3_HUMAN Hi	3	1	1	1	10	10	10	13.956	130	130;90;99	0	2.4452	NaN	NaN	NaN	1	0	Median	NaN	NaN	NaN	1	0	Median	NaN	NaN	NaN	1	0	Median	23458000	10499000	2389700	10570000				80	8782	TRUE	9030	20036
A0A087WZH7;P29966	A0A087WZH7;P29966	7;7	7;7	7;7	Myristoylated alanine-rich C-kinase substrate	MARCKS	>tr|A0A087WZH7|A0A087WZH7_HUMAN Myristoylated alanine-rich C-kinase substrate OS=Homo sapiens GN=MARCKS PE=1 SV=1;>sp|P29966|MARCS_HUMAN Myristoylated alanine-rich C-kinase substrate OS=Homo sapiens GN=MARCKS PE=1 SV=4	2	7	7	7	24.5	24.5	24.5	31.595	330	330;332	0	57.845	0.17674	0.71075	16.37	8	0	Median	0.76848	0.77169	5.0387	8	0	Median	4.3995	1.1706	15.347	8	0	Median	207620000	106980000	21042000	79597000				81	353;354;2692;4321;4345;8836;12282	True;True;True;True;True;True;True	364;365;2774;4435;4460;9085;12705	704;705;6095;9495;9496;9541;20159;27561;27562
A0A087WZK0;P49366;M0R1T4;M0R0V2	A0A087WZK0;P49366;M0R1T4;M0R0V2	2;2;1;1	2;2;1;1	2;2;1;1	Deoxyhypusine synthase	DHPS	>tr|A0A087WZK0|A0A087WZK0_HUMAN Deoxyhypusine synthase OS=Homo sapiens GN=DHPS PE=1 SV=1;>sp|P49366|DHYS_HUMAN Deoxyhypusine synthase OS=Homo sapiens GN=DHPS PE=1 SV=1;>tr|M0R1T4|M0R1T4_HUMAN Deoxyhypusine synthase (Fragment) OS=Homo sapiens GN=DHPS PE=1 S	4	2	2	2	8.1	8.1	8.1	41.114	370	370;369;115;159	0	4.6416	0.22225	0.79175	5.3851	4	4	Median	0.86327	0.85436	11.211	4	4	Median	3.7834	1.0129	14.391	4	4	Median	23862000	11707000	2670900	9484700				82	7962;14764	True;True	8188;15286	18065;33741;33742;33743
A0A087WZK9;B3KS98;O15372;E5RJT0	A0A087WZK9;B3KS98;O15372	3;3;3;1	3;3;3;1	3;3;3;1	Eukaryotic translation initiation factor 3 subunit H	EIF3H	>tr|A0A087WZK9|A0A087WZK9_HUMAN Eukaryotic translation initiation factor 3 subunit H OS=Homo sapiens GN=EIF3H PE=1 SV=1;>tr|B3KS98|B3KS98_HUMAN Eukaryotic translation initiation factor 3 subunit H OS=Homo sapiens GN=EIF3H PE=1 SV=1;>sp|O15372|EIF3H_HUMAN E	4	3	3	3	12	12	12	39.589	349	349;366;352;244	0	3.1413	0.27736	0.98913	13.579	3	2	Median	1.0218	1.0353	7.377	3	2	Median	3.6842	0.86422	23.372	3	2	Median	144580000	65221000	16702000	62656000				83	7659;7670;11098	True;True;True	7881;7892;11493	17270;17271;17292;24949
D6R9P3;D6RD18;D6RBZ0;A0A087WZV1;Q99729	D6R9P3;D6RD18;D6RBZ0;A0A087WZV1;Q99729	10;10;10;10;8	10;10;10;10;8	10;10;10;10;8	Heterogeneous nuclear ribonucleoprotein A/B	HNRNPAB	>tr|D6R9P3|D6R9P3_HUMAN Heterogeneous nuclear ribonucleoprotein A/B OS=Homo sapiens GN=HNRNPAB PE=1 SV=1;>tr|D6RD18|D6RD18_HUMAN Heterogeneous nuclear ribonucleoprotein A/B OS=Homo sapiens GN=HNRNPAB PE=1 SV=1;>tr|D6RBZ0|D6RBZ0_HUMAN Heterogeneous nuclear	5	10	10	10	32.9	32.9	32.9	30.302	280	280;283;327;330;332	0	61.689	0.27246	1.0924	16.986	29	0	Median	0.99151	0.96218	11.291	29	0	Median	3.5763	0.87937	13.843	29	0	Median	1240200000	538980000	162280000	538890000				84	2338;3453;3462;4387;4441;5804;5805;6826;9447;9448	True;True;True;True;True;True;True;True;True;True	2407;3550;3559;4504;4559;5953;5954;7018;9744;9745;9746	5317;5318;7671;7672;7673;7703;9634;9635;9636;9637;9638;9639;9640;9641;9642;9643;9783;9784;9785;9786;9787;12935;12936;12937;12938;15255;15256;21538;21539;21540;21541;21542;21543;21544;21545
A0A087WZX2;O95139	A0A087WZX2;O95139	1;1	1;1	1;1	NADH dehydrogenase [ubiquinone] 1 beta subcomplex subunit 6	NDUFB6	>tr|A0A087WZX2|A0A087WZX2_HUMAN NADH dehydrogenase [ubiquinone] 1 beta subcomplex subunit 6 OS=Homo sapiens GN=NDUFB6 PE=1 SV=1;>sp|O95139|NDUB6_HUMAN NADH dehydrogenase [ubiquinone] 1 beta subcomplex subunit 6 OS=Homo sapiens GN=NDUFB6 PE=1 SV=3	2	1	1	1	10.3	10.3	10.3	11.716	97	97;128	0	3.2981	NaN	NaN	NaN	1	0	Median	NaN	NaN	NaN	1	0	Median	NaN	NaN	NaN	1	0	Median	18792000	8002900	2007000	8782400				85	12586	TRUE	13021	28235
A0A087WZZ5;Q13435;E9PPJ0;E9PJ04;H0YCG1;E9PJT3;E9PIL8;H0YEX5	A0A087WZZ5;Q13435;E9PPJ0;E9PJ04;H0YCG1	13;13;11;7;7;6;2;2	13;13;11;7;7;6;2;2	13;13;11;7;7;6;2;2	Splicing factor 3B subunit 2	SF3B2	>tr|A0A087WZZ5|A0A087WZZ5_HUMAN Splicing factor 3B subunit 2 OS=Homo sapiens GN=SF3B2 PE=1 SV=1;>sp|Q13435|SF3B2_HUMAN Splicing factor 3B subunit 2 OS=Homo sapiens GN=SF3B2 PE=1 SV=2;>tr|E9PPJ0|E9PPJ0_HUMAN Splicing factor 3B subunit 2 OS=Homo sapiens GN=S	8	13	13	13	15	15	15	97.584	871	871;895;878;354;387;273;81;315	0	19.02	0.24619	0.90905	12.943	13	0	Median	1.0226	0.99476	9.1241	13	0	Median	4.1412	1.0551	15.414	13	0	Median	262700000	110380000	31646000	120680000				86	210;211;4045;4556;4557;5666;6317;7105;7304;7401;10710;13709;15094	True;True;True;True;True;True;True;True;True;True;True;True;True	215;216;4155;4678;4679;5812;6490;7303;7510;7615;11093;14182;15624	390;391;8930;10040;10041;10042;12650;14142;15789;16362;16624;24100;30915;34432
A0A0C4DFV9;A0A087X027;Q01105;P0DME0	A0A0C4DFV9;A0A087X027;Q01105;P0DME0	4;4;4;4	4;4;4;4	4;4;4;4	Protein SET;Protein SETSIP	SET;SETSIP	>tr|A0A0C4DFV9|A0A0C4DFV9_HUMAN Protein SET OS=Homo sapiens GN=SET PE=1 SV=1;>tr|A0A087X027|A0A087X027_HUMAN Protein SETSIP OS=Homo sapiens GN=SETSIP PE=3 SV=1;>sp|Q01105|SET_HUMAN Protein SET OS=Homo sapiens GN=SET PE=1 SV=3;>sp|P0DME0|SETLP_HUMAN Protein	4	4	4	4	16.9	16.9	16.9	31.124	266	266;292;290;302	0	43.208	0.27845	1.1245	6.1437	8	0	Median	0.68071	0.62693	5.2637	8	0	Median	2.5188	0.58291	5.7895	8	0	Median	301040000	149040000	46319000	105690000				87	2819;5661;8771;13599	True;True;True;True	2905;5807;9019;14068	6356;6357;6358;6359;12644;20011;20012;20013;30648;30649
A0A087X054;Q9Y4L1;E9PJ21;A0A087WWI4;K7EQK2;J3KTF1;J3QL06;Q9BST8;J3QQH7;J3QLE9;A0A087WW13;A0A087X214;Q9BXT5	A0A087X054;Q9Y4L1;E9PJ21;A0A087WWI4;K7EQK2	42;42;27;27;27;11;10;9;9;9;6;5;1	42;42;27;27;27;11;10;9;9;9;6;5;1	42;42;27;27;27;11;10;9;9;9;6;5;1	Hypoxia up-regulated protein 1	HYOU1	>tr|A0A087X054|A0A087X054_HUMAN Hypoxia up-regulated protein 1 OS=Homo sapiens GN=HYOU1 PE=1 SV=1;>sp|Q9Y4L1|HYOU1_HUMAN Hypoxia up-regulated protein 1 OS=Homo sapiens GN=HYOU1 PE=1 SV=1;>tr|E9PJ21|E9PJ21_HUMAN Hypoxia up-regulated protein 1 (Fragment) OS=	13	42	42	42	47.8	47.8	47.8	104.78	937	937;999;656;677;678;224;211;147;149;154;103;92;2789	0	226.26	0.26813	1.067	12.733	48	0	Median	0.9433	0.89345	7.0372	48	0	Median	3.4513	0.85118	13.25	48	0	Median	1049300000	458190000	143780000	447330000				88	140;349;350;2052;2696;3376;3426;3611;3612;3885;7002;7174;7333;7473;7822;7964;8041;8506;8627;8628;8629;8776;8784;9287;9466;9552;9895;10398;11542;12710;12769;12971;12972;13204;13205;13354;13549;14135;14366;14590;15033;15291	True;True;True;True;True;True;True;True;True;True;True;True;True;True;True;True;True;True;True;True;True;True;True;True;True;True;True;True;True;True;True;True;True;True;True;True;True;True;True;True;True;True	144;359;360;2117;2778;3472;3523;3708;3709;3990;7199;7374;7543;7689;8046;8190;8191;8270;8749;8871;8872;8873;9024;9032;9551;9765;9766;9868;10247;10774;11950;13150;13211;13212;13425;13426;13661;13662;13818;14016;14631;14873;15104;15561;15832	252;253;689;690;691;4752;4753;4754;6102;7529;7530;7606;8014;8015;8605;8606;8607;15601;15602;15603;15993;16426;16427;16810;17755;18068;18069;18070;18071;18356;19451;19452;19453;19454;19455;19717;19718;19719;19720;19721;20027;20028;20039;21186;21570;21571;21735;22452;22453;22454;23496;25890;25891;28543;28670;28671;29180;29181;29655;29656;30003;30004;30512;32143;32144;32145;32735;32736;33310;34282;3…
E9PLA9;G3V153;A0A087X082;Q14444	E9PLA9;G3V153;A0A087X082;Q14444	1;1;1;1	1;1;1;1	1;1;1;1	Caprin-1	CAPRIN1	>tr|E9PLA9|E9PLA9_HUMAN Caprin-1 (Fragment) OS=Homo sapiens GN=CAPRIN1 PE=1 SV=1;>tr|G3V153|G3V153_HUMAN Caprin-1 OS=Homo sapiens GN=CAPRIN1 PE=1 SV=1;>tr|A0A087X082|A0A087X082_HUMAN Caprin-1 OS=Homo sapiens GN=CAPRIN1 PE=1 SV=1;>sp|Q14444|CAPR1_HUMAN Capr	4	1	1	1	5.9	5.9	5.9	20.236	186	186;628;649;709	0	4.8431	0.22492	0.94513	3.1862	3	2	Median	0.98458	0.94106	3.2732	3	2	Median	4.6835	1.1706	7.1776	3	2	Plateau	17366000	7397600	1811300	8156600				89	8472	TRUE	8712	19380;19381;19382
A0A087X0A8;D6RGG3;Q99715;H0Y4P7;H0Y5N9	A0A087X0A8;D6RGG3;Q99715;H0Y4P7;H0Y5N9	2;2;2;1;1	2;2;2;1;1	2;2;2;1;1	Collagen alpha-1(XII) chain	COL12A1	>tr|A0A087X0A8|A0A087X0A8_HUMAN Collagen alpha-1(XII) chain OS=Homo sapiens GN=COL12A1 PE=1 SV=1;>tr|D6RGG3|D6RGG3_HUMAN Collagen alpha-1(XII) chain OS=Homo sapiens GN=COL12A1 PE=1 SV=1;>sp|Q99715|COCA1_HUMAN Collagen alpha-1(XII) chain OS=Homo sapiens GN=	5	2	2	2	1.2	1.2	1.2	203.11	1874	1874;3062;3063;638;756	0	4.4393	NaN	NaN	NaN	0	0	Median	NaN	NaN	NaN	0	0	Median	NaN	NaN	NaN	0	0	Median	1354200	422620	0	931580				90	852;11645	True;True	884;12053	1964;1965;26183
A0A087X0H9;Q5T8P6;E2PSN0	A0A087X0H9;Q5T8P6	3;3;1	3;3;1	3;3;1	RNA-binding protein 26	RBM26	>tr|A0A087X0H9|A0A087X0H9_HUMAN RNA-binding protein 26 OS=Homo sapiens GN=RBM26 PE=1 SV=1;>sp|Q5T8P6|RBM26_HUMAN RNA-binding protein 26 OS=Homo sapiens GN=RBM26 PE=1 SV=3	3	3	3	3	4	4	4	113.79	1009	1009;1007;171	0	2.0958	0.31495	1.3611	10.844	3	2	Median	0.99124	1.1152	54.702	3	2	Median	3.4199	0.89911	49.584	3	2	Median	18360000	7728100	2353000	8279200				91	870;7126;13020	True;True;True	902;7324;13474	2007;15843;29286
A0A087X0K1;Q9Y376;B7ZBJ4;Q5TAW7;Q9H9S4	A0A087X0K1;Q9Y376;B7ZBJ4;Q5TAW7;Q9H9S4	2;2;1;1;1	2;2;1;1;1	2;2;1;1;1	Calcium-binding protein 39;Calcium-binding protein 39-like	CAB39;CAB39L	>tr|A0A087X0K1|A0A087X0K1_HUMAN Calcium-binding protein 39 OS=Homo sapiens GN=CAB39 PE=1 SV=1;>sp|Q9Y376|CAB39_HUMAN Calcium-binding protein 39 OS=Homo sapiens GN=CAB39 PE=1 SV=1;>tr|B7ZBJ4|B7ZBJ4_HUMAN Calcium-binding protein 39-like OS=Homo sapiens GN=CA	5	2	2	2	5.9	5.9	5.9	39.452	339	339;341;193;280;337	0	2.9598	0.3722	1.5342	28.121	2	2	Median	1.1544	1.1259	1.9715	2	2	Median	3.1015	0.7543	28.588	2	2	Median	6168000	2790000	679480	2698500				92	2567;15138	True;True	2646;15669	5835;34564
A0A087X0Q9;Q9BVL4	A0A087X0Q9;Q9BVL4	1;1	1;1	1;1	Selenoprotein O	SELO	>tr|A0A087X0Q9|A0A087X0Q9_HUMAN Selenoprotein O OS=Homo sapiens GN=SELO PE=1 SV=1;>sp|Q9BVL4|SELO_HUMAN Selenoprotein O OS=Homo sapiens GN=SELO PE=2 SV=3	2	1	1	1	3	3	3	73.338	668	668;669	0.0045025	1.0576	0.28713	1.1257	2.0662	2	2	Median	1.1822	1.1774	4.5111	2	2	Median	4.1172	1.0827	2.4449	2	2	Median	7139100	2645900	925830	3567400				93	9055	TRUE	9312	20659;20660
A0A087X0R6;Q9UMY4	A0A087X0R6;Q9UMY4	8;8	8;8	6;6	Sorting nexin-12	SNX12	>tr|A0A087X0R6|A0A087X0R6_HUMAN Sorting nexin-12 OS=Homo sapiens GN=SNX12 PE=1 SV=1;>sp|Q9UMY4|SNX12_HUMAN Sorting nexin-12 OS=Homo sapiens GN=SNX12 PE=1 SV=3	2	8	8	6	39	39	34.9	19.825	172	172;172	0	15.293	0.24697	1.0185	18.549	7	0	Median	0.95244	0.98163	4.8377	7	0	Median	3.7518	0.96129	23.18	7	0	Median	167100000	64134000	25286000	77675000				94	4044;5541;6695;10492;10984;11165;12887;15349	True;True;True;True;True;True;True;True	4154;5684;6883;10873;11371;11560;13340;15892	8929;12388;12389;15004;23678;24719;24720;25073;28971;35073
A0A087X0S5;P12109	A0A087X0S5;P12109	6;6	6;6	6;6	Collagen alpha-1(VI) chain	COL6A1	>tr|A0A087X0S5|A0A087X0S5_HUMAN Collagen alpha-1(VI) chain OS=Homo sapiens GN=COL6A1 PE=1 SV=1;>sp|P12109|CO6A1_HUMAN Collagen alpha-1(VI) chain OS=Homo sapiens GN=COL6A1 PE=1 SV=3	2	6	6	6	7.9	7.9	7.9	108.34	1026	1026;1028	0	28.326	0.25295	1.0331	21.13	8	8	Median	1.1912	1.1419	15.768	8	8	Median	5.2498	1.2286	24.344	8	8	Median	42627000	17214000	4197100	21216000				95	2004;5555;12297;13421;13681;14327	True;True;True;True;True;True	2068;5699;12720;13886;14154;14834	4603;4604;12429;27588;30222;30865;32606;32607
A0A087X0X1;Q9UJ72	A0A087X0X1;Q9UJ72	2;2	2;2	2;2	Annexin A10	ANXA10	>tr|A0A087X0X1|A0A087X0X1_HUMAN Annexin A10 OS=Homo sapiens GN=ANXA10 PE=1 SV=1;>sp|Q9UJ72|ANX10_HUMAN Annexin A10 OS=Homo sapiens GN=ANXA10 PE=1 SV=3	2	2	2	2	9	9	9	37.111	323	323;324	0	6.7903	NaN	NaN	NaN	1	0	Median	NaN	NaN	NaN	1	0	Median	NaN	NaN	NaN	1	0	Median	12424000	5153200	742300	6528100				96	991;5124	True;True	1025;5257	2272;11333
H0YJR8;A0A087X0Z7;H0YJ66;Q9Y394	H0YJR8;A0A087X0Z7;H0YJ66;Q9Y394	1;1;1;1	1;1;1;1	1;1;1;1	Dehydrogenase/reductase SDR family member 7	DHRS7	>tr|H0YJR8|H0YJR8_HUMAN Dehydrogenase/reductase SDR family member 7 (Fragment) OS=Homo sapiens GN=DHRS7 PE=1 SV=1;>tr|A0A087X0Z7|A0A087X0Z7_HUMAN Dehydrogenase/reductase SDR family member 7 OS=Homo sapiens GN=DHRS7 PE=1 SV=1;>tr|H0YJ66|H0YJ66_HUMAN Dehydro	4	1	1	1	10.8	10.8	10.8	23.368	212	212;376;399;339	0	4.6636	0.23936	0.98719	1.6446	2	2	Median	0.81842	0.79282	2.7305	2	2	Median	3.4191	0.83618	4.3751	2	2	Median	9970300	4592800	1258200	4119300				97	6691	TRUE	6879	14996;14997
A0A087X106;CON__O43790;CON__Q14533;O43790;Q14533;CON__Q6NT21;CON__P78385;P78385;A6NCN2;F5GYI5;CON__Q61726;CON__P78386;P78386;CON__Q9NSB4;Q9NSB4	A0A087X106;CON__O43790;CON__Q14533;O43790;Q14533;CON__Q6NT21;CON__P78385;P78385;A6NCN2;F5GYI5;CON__Q61726;CON__P78386;P78386	6;6;6;6;6;5;5;5;4;3;3;3;3;1;1	6;6;6;6;6;5;5;5;4;3;3;3;3;1;1	6;6;6;6;6;5;5;5;4;3;3;3;3;1;1	Keratin, type II cuticular Hb6;Keratin, type II cuticular Hb1;Keratin, type II cuticular Hb3;Putative keratin-87 protein;Keratin, type II cuticular Hb5	KRT81;KRT86;KRT83;KRT87P;KRT85	>tr|A0A087X106|A0A087X106_HUMAN Keratin, type II cuticular Hb1 OS=Homo sapiens GN=KRT81 PE=1 SV=1;>O43790 SWISS-PROT:O43790 Keratin, type II cuticular Hb6 (Hair keratin, type II Hb6) (ghHb6) - Homo sapiens (Human).;>Q14533 SWISS-PROT:Q14533 Keratin, type I	15	6	6	6	11.4	11.4	11.4	53.116	484	484;486;505;486;505;493;493;493;255;295;479;507;507;513;513	0	18.961	0.29188	1.2523	9.8394	8	0	Median	0.59098	0.60331	10.802	8	0	Median	2.0511	0.51655	11.91	8	0	Median	129510000	64663000	20745000	44098000			+	98	1382;3470;7310;8165;8927;12713	True;True;True;True;True;True	1432;3567;7517;8395;9177;13153	3205;3206;7716;16371;18658;20364;28547;28548;28549;28550
A0A087X117;Q15155;A0A087WW46;J3KN36;P69849;Q5JPE7;H3BUC9	A0A087X117;Q15155;A0A087WW46;J3KN36;P69849;Q5JPE7	3;3;2;2;2;2;1	3;3;2;2;2;2;1	3;3;2;2;2;2;1	Nodal modulator 1;Nodal modulator 3;Nodal modulator 2	NOMO1;NOMO3;NOMO2	>tr|A0A087X117|A0A087X117_HUMAN Nodal modulator 1 OS=Homo sapiens GN=NOMO1 PE=1 SV=1;>sp|Q15155|NOMO1_HUMAN Nodal modulator 1 OS=Homo sapiens GN=NOMO1 PE=1 SV=5;>tr|A0A087WW46|A0A087WW46_HUMAN Nodal modulator 1 OS=Homo sapiens GN=NOMO1 PE=1 SV=1;>tr|J3KN36	7	3	3	3	3.4	3.4	3.4	139.47	1267	1267;1222;1100;1267;1222;1267;144	0	2.871	0.29021	1.1094	24.719	3	1	Median	1.1051	1.0444	5.8081	3	1	Median	4.0267	1.0207	21.137	3	1	Plateau	14183000	5634700	2137300	6411200				99	952;6390;11997	True;True;True	985;6564;12411	2204;14317;26946
A0A087X142;A6NMH6;A6NFQ9;F8W8I8;Q92599;B1AMS2;Q14141	A0A087X142;A6NMH6;A6NFQ9;F8W8I8;Q92599;B1AMS2;Q14141	2;2;2;2;2;1;1	1;1;1;1;1;0;0	1;1;1;1;1;0;0	Septin-8;Septin-6	SEPT8;SEPT6	>tr|A0A087X142|A0A087X142_HUMAN Septin-8 OS=Homo sapiens GN=SEPT8 PE=1 SV=1;>tr|A6NMH6|A6NMH6_HUMAN Septin-8 OS=Homo sapiens GN=SEPT8 PE=1 SV=1;>tr|A6NFQ9|A6NFQ9_HUMAN Septin-8 OS=Homo sapiens GN=SEPT8 PE=1 SV=1;>tr|F8W8I8|F8W8I8_HUMAN Septin-8 OS=Homo sap	7	2	1	1	3.8	2.1	2.1	49.355	426	426;430;440;460;483;431;434	0	2.2515	NaN	NaN	NaN	1	0	Median	NaN	NaN	NaN	1	0	Median	NaN	NaN	NaN	1	0	Median	6775200	2905900	888390	2981000				100	3986;14244	True;False	4096;14749	8817;32396
A0A087X1A5;Q5JW30;O95793;Q5JW28	A0A087X1A5;Q5JW30;O95793	4;4;4;1	4;4;4;1	4;4;4;1	Double-stranded RNA-binding protein Staufen homolog 1	STAU1	>tr|A0A087X1A5|A0A087X1A5_HUMAN Double-stranded RNA-binding protein Staufen homolog 1 OS=Homo sapiens GN=STAU1 PE=1 SV=1;>tr|Q5JW30|Q5JW30_HUMAN Double-stranded RNA-binding protein Staufen homolog 1 OS=Homo sapiens GN=STAU1 PE=1 SV=1;>sp|O95793|STAU1_HUMAN	4	4	4	4	9.3	9.3	9.3	54.945	493	493;494;577;199	0.00145	1.5697	0.29183	1.18	19.123	3	3	Median	1.1627	1.1372	38.529	2	2	Median	4.676	1.1759	14.935	2	2	Median	76654000	27970000	7753200	40931000				101	8352;8560;10016;14372	True;True;True;True	8584;8803;10374;14879	19106;19555;22717;32748
A0A087X1B7;X6R700;Q9Y3Y2	A0A087X1B7;X6R700;Q9Y3Y2	1;1;1	1;1;1	1;1;1	Chromatin target of PRMT1 protein	CHTOP	>tr|A0A087X1B7|A0A087X1B7_HUMAN Chromatin target of PRMT1 protein OS=Homo sapiens GN=CHTOP PE=1 SV=1;>tr|X6R700|X6R700_HUMAN Chromatin target of PRMT1 protein OS=Homo sapiens GN=CHTOP PE=1 SV=1;>sp|Q9Y3Y2|CHTOP_HUMAN Chromatin target of PRMT1 protein OS=Ho	3	1	1	1	17.1	17.1	17.1	8.5199	76	76;223;248	0	23.482	NaN	NaN	NaN	1	0	Median	NaN	NaN	NaN	1	0	Median	NaN	NaN	NaN	1	0	Median	12571000	5945400	1245200	5380000				102	1485	TRUE	1537	3503
A0A087X1H5;Q15057;F8WAU0;H7C3K3	A0A087X1H5;Q15057;F8WAU0;H7C3K3	2;2;1;1	2;2;1;1	2;2;1;1	Arf-GAP with coiled-coil, ANK repeat and PH domain-containing protein 2	ACAP2	>tr|A0A087X1H5|A0A087X1H5_HUMAN Arf-GAP with coiled-coil, ANK repeat and PH domain-containing protein 2 OS=Homo sapiens GN=ACAP2 PE=1 SV=1;>sp|Q15057|ACAP2_HUMAN Arf-GAP with coiled-coil, ANK repeat and PH domain-containing protein 2 OS=Homo sapiens GN=ACA	4	2	2	2	3.1	3.1	3.1	88.02	777	777;778;49;229	0	3.1002	0.15092	0.60851	139.19	2	2	Median	0.81185	0.79321	5.3045	2	2	Median	5.3793	1.4039	132.7	2	2	Median	93626000	49844000	1448700	42333000				103	7088;11700	True;True	7286;12108	15757;26291
H7C3I1;F6VDH7;Q3KNR6;A0A087X1H6;P50502;Q8IZP2;Q8NFI4	H7C3I1;F6VDH7;Q3KNR6;A0A087X1H6;P50502;Q8IZP2;Q8NFI4	6;6;6;6;6;5;4	6;6;6;6;6;5;4	6;6;6;6;6;5;4	Hsc70-interacting protein;Putative protein FAM10A4;Putative protein FAM10A5	ST13;ST13P4;ST13P5	>tr|H7C3I1|H7C3I1_HUMAN Hsc70-interacting protein (Fragment) OS=Homo sapiens GN=ST13 PE=1 SV=1;>tr|F6VDH7|F6VDH7_HUMAN Hsc70-interacting protein (Fragment) OS=Homo sapiens GN=ST13 PE=1 SV=1;>tr|Q3KNR6|Q3KNR6_HUMAN Hsc70-interacting protein OS=Homo sapiens	7	6	6	6	40.4	40.4	40.4	16.219	146	146;162;211;254;369;240;369	0	36.092	0.29548	1.0899	10.833	6	0	Median	1.0548	1.0825	10.886	6	0	Median	3.5799	0.90785	8.2383	6	0	Median	408160000	173920000	52061000	182180000				104	705;708;709;7344;8674;13301	True;True;True;True;True;True	733;736;737;7554;8919;13764	1629;1632;1633;16456;19795;29876
A0A087X1I3;D6RFM5;P31040;H0Y8X1	A0A087X1I3;D6RFM5;P31040	3;3;3;1	3;3;3;1	3;3;3;1	Succinate dehydrogenase [ubiquinone] flavoprotein subunit, mitochondrial	SDHA	>tr|A0A087X1I3|A0A087X1I3_HUMAN Succinate dehydrogenase [ubiquinone] flavoprotein subunit, mitochondrial OS=Homo sapiens GN=SDHA PE=1 SV=1;>tr|D6RFM5|D6RFM5_HUMAN Succinate dehydrogenase [ubiquinone] flavoprotein subunit, mitochondrial OS=Homo sapiens GN=S	4	3	3	3	7.7	7.7	7.7	56.662	519	519;583;664;126	0	20.286	0.2452	0.94778	16.684	6	4	Median	1.0266	1.0381	7.7409	6	4	Median	4.18	1.0992	17.799	6	4	Median	140400000	61838000	16321000	62244000				105	5659;7717;14560	True;True;True	5805;7939;15072	12641;17441;17442;17443;17444;33234
A0A087X1K9;E5RGR0;O75608;E5RJ48;B4DP64;E5RI35	A0A087X1K9;E5RGR0;O75608;E5RJ48;B4DP64	4;4;4;2;2;1	4;4;4;2;2;1	4;4;4;2;2;1	Acyl-protein thioesterase 1	LYPLA1	>tr|A0A087X1K9|A0A087X1K9_HUMAN Acyl-protein thioesterase 1 OS=Homo sapiens GN=LYPLA1 PE=1 SV=1;>tr|E5RGR0|E5RGR0_HUMAN Acyl-protein thioesterase 1 (Fragment) OS=Homo sapiens GN=LYPLA1 PE=1 SV=1;>sp|O75608|LYPA1_HUMAN Acyl-protein thioesterase 1 OS=Homo sa	6	4	4	4	27.7	27.7	27.7	17.981	166	166;197;230;90;196;103	0	8.1065	0.30078	1.1873	16.544	4	0	Median	1.0192	1.0317	10.968	4	0	Median	3.2809	0.84848	16.313	4	0	Median	95872000	42292000	14063000	39517000				106	967;1441;7340;12848	True;True;True;True	1000;1492;7550;13297	2225;2226;3359;3360;16440;28881;28882
A0A087X1N2;Q03701;C9J9W7	A0A087X1N2;Q03701	5;5;1	5;5;1	5;5;1	CCAAT/enhancer-binding protein zeta	CEBPZ	>tr|A0A087X1N2|A0A087X1N2_HUMAN CCAAT/enhancer-binding protein zeta OS=Homo sapiens GN=CEBPZ PE=1 SV=1;>sp|Q03701|CEBPZ_HUMAN CCAAT/enhancer-binding protein zeta OS=Homo sapiens GN=CEBPZ PE=1 SV=3	3	5	5	5	5.8	5.8	5.8	114.16	998	998;1054;146	0	3.9487	0.26622	1.046	63.948	6	4	Median	0.90936	0.86179	30.288	6	4	Median	3.4296	0.80349	37.786	6	4	Median	27804000	10238000	5096900	12470000				107	801;1096;2267;5182;9286	True;True;True;True;True	832;1135;2336;5317;9550	1850;2543;5183;5184;11466;21185
J3QT95;A0A087X1P5;J3KQ41;Q9H9Q2;J3KQV6;J3QT67;J3QT66;J3QT69;J3QT50;J3QT43;J3QT73;J3KQ34	J3QT95;A0A087X1P5;J3KQ41;Q9H9Q2;J3KQV6;J3QT67;J3QT66;J3QT69;J3QT50;J3QT43;J3QT73;J3KQ34	2;2;2;2;1;1;1;1;1;1;1;1	2;2;2;2;1;1;1;1;1;1;1;1	2;2;2;2;1;1;1;1;1;1;1;1	COP9 signalosome complex subunit 7b	COPS7B	>tr|J3QT95|J3QT95_HUMAN COP9 signalosome complex subunit 7b (Fragment) OS=Homo sapiens GN=COPS7B PE=1 SV=1;>tr|A0A087X1P5|A0A087X1P5_HUMAN COP9 signalosome complex subunit 7b OS=Homo sapiens GN=COPS7B PE=1 SV=1;>tr|J3KQ41|J3KQ41_HUMAN COP9 signalosome comp	12	2	2	2	18	18	18	16.956	150	150;209;278;264;54;62;62;68;78;103;172;230	0	13.667	0.22485	0.86394	31.087	3	2	Median	0.89146	0.91843	8.4308	3	2	Median	3.9646	1.0577	34.791	3	2	Median	10603000	5154200	1174700	4273800				108	549;6824	True;True	568;7016	1206;1207;15253
A0A087X1S2;P67809;H0Y449;P16989;C9J5V9;Q9Y2T7	A0A087X1S2;P67809;H0Y449	7;7;4;3;2;2	7;7;4;3;2;2	7;7;4;3;2;2	Nuclease-sensitive element-binding protein 1	YBX1	>tr|A0A087X1S2|A0A087X1S2_HUMAN Nuclease-sensitive element-binding protein 1 OS=Homo sapiens GN=YBX1 PE=1 SV=2;>sp|P67809|YBOX1_HUMAN Nuclease-sensitive element-binding protein 1 OS=Homo sapiens GN=YBX1 PE=1 SV=3;>tr|H0Y449|H0Y449_HUMAN Nuclease-sensitive	6	7	7	7	30.3	30.3	30.3	34.656	320	320;324;374;372;216;364	0	61.803	0.24937	1.0111	10.998	10	0	Median	0.9704	1.0047	9.7657	10	0	Median	3.9973	0.98678	10.488	10	0	Median	492320000	209430000	59027000	223860000				109	2789;2790;4154;9775;9776;9855;10974	True;True;True;True;True;True;True	2874;2875;4265;10124;10125;10207;11361	6294;6295;6296;9121;22244;22245;22246;22247;22248;22384;24699
A0A087X1Z3;Q9UL46;H0YM70;H0YKU2	A0A087X1Z3;Q9UL46;H0YM70	12;12;11;3	12;12;11;3	12;12;11;3	Proteasome activator complex subunit 2	PSME2	>tr|A0A087X1Z3|A0A087X1Z3_HUMAN Proteasome activator complex subunit 2 OS=Homo sapiens GN=PSME2 PE=1 SV=1;>sp|Q9UL46|PSME2_HUMAN Proteasome activator complex subunit 2 OS=Homo sapiens GN=PSME2 PE=1 SV=4;>tr|H0YM70|H0YM70_HUMAN Proteasome activator complex	4	12	12	12	63.4	63.4	63.4	29.126	254	254;239;228;85	0	83.596	0.22686	0.91688	17.005	18	0	Median	1.0145	1.0377	7.8584	18	0	Median	4.1811	1.0826	10.338	18	0	Median	620910000	270280000	77307000	273320000				110	525;1112;1164;1932;3329;5703;6026;6664;10644;12728;14158;15036	True;True;True;True;True;True;True;True;True;True;True;True	544;1151;1209;1991;3424;5850;6180;6852;11027;13168;14654;15564	1137;1138;1139;2585;2586;2587;2588;2714;2715;4475;7429;12733;13502;13503;14944;23956;23957;28583;28584;28585;28586;32194;32195;32196;34286;34287;34288
A0A087X208;O00468	A0A087X208;O00468	4;4	4;4	4;4	Agrin;Agrin N-terminal 110 kDa subunit;Agrin C-terminal 110 kDa subunit;Agrin C-terminal 90 kDa fragment;Agrin C-terminal 22 kDa fragment	AGRN	>tr|A0A087X208|A0A087X208_HUMAN Agrin OS=Homo sapiens GN=AGRN PE=1 SV=1;>sp|O00468|AGRIN_HUMAN Agrin OS=Homo sapiens GN=AGRN PE=1 SV=5	2	4	4	4	2.2	2.2	2.2	202.29	1930	1930;2067	0	4.5502	NaN	NaN	NaN	0	0	Median	NaN	NaN	NaN	0	0	Median	NaN	NaN	NaN	0	0	Median	1363100	1363100	0	0				111	1855;3638;7597;12127	True;True;True;True	1913;3735;7817;12544	4300;8063;17151;27240
A0A087X256;Q2M389	A0A087X256;Q2M389	1;1	1;1	1;1	WASH complex subunit 7	KIAA1033	>tr|A0A087X256|A0A087X256_HUMAN WASH complex subunit 7 OS=Homo sapiens GN=KIAA1033 PE=1 SV=1;>sp|Q2M389|WASH7_HUMAN WASH complex subunit 7 OS=Homo sapiens GN=KIAA1033 PE=1 SV=2	2	1	1	1	1.6	1.6	1.6	136.5	1174	1174;1173	0	3.2572	NaN	NaN	NaN	1	1	Median	NaN	NaN	NaN	1	1	Median	NaN	NaN	NaN	1	1	Median	2466200	794840	318830	1352500				112	1705	TRUE	1761	3980
A0A087X271;B4DDF4;B4DUT8;Q99439;K7ES69;H3BVI6;A0A087X1X5;A0A087WV51;H3BQH0	A0A087X271;B4DDF4;B4DUT8;Q99439;K7ES69;H3BVI6	9;9;9;9;6;5;4;1;1	8;8;8;8;5;5;4;1;1	8;8;8;8;5;5;4;1;1	Calponin;Calponin-2	CNN2	>tr|A0A087X271|A0A087X271_HUMAN Calponin (Fragment) OS=Homo sapiens GN=CNN2 PE=1 SV=1;>tr|B4DDF4|B4DDF4_HUMAN Calponin OS=Homo sapiens GN=CNN2 PE=1 SV=1;>tr|B4DUT8|B4DUT8_HUMAN Calponin OS=Homo sapiens GN=CNN2 PE=1 SV=1;>sp|Q99439|CNN2_HUMAN Calponin-2 OS=	9	9	8	8	57	57	57	19.757	179	179;298;330;309;148;218;191;66;154	0	73.233	0.24993	1.0066	16.674	8	0	Median	0.91495	0.90068	8.8111	8	0	Median	3.2923	0.81011	12.342	8	0	Median	496320000	217480000	67458000	211380000				113	628;4730;4767;4913;11740;12039;12720;13254;14966	True;True;True;False;True;True;True;True;True	652;4856;4893;5043;12151;12453;13160;13716;15494	1424;10458;10459;10520;10521;10887;10888;26403;26404;26405;27013;27014;28564;28565;29795;29796;34152;34153
A0A087X2B5;P35613;I3L192;A0A087WUV8;R4GMX5;R4GN83	A0A087X2B5;P35613;I3L192;A0A087WUV8;R4GMX5	5;5;4;4;3;2	5;5;4;4;3;2	5;5;4;4;3;2	Basigin	BSG	>tr|A0A087X2B5|A0A087X2B5_HUMAN Basigin (Fragment) OS=Homo sapiens GN=BSG PE=1 SV=1;>sp|P35613|BASI_HUMAN Basigin OS=Homo sapiens GN=BSG PE=1 SV=2;>tr|I3L192|I3L192_HUMAN Basigin (Fragment) OS=Homo sapiens GN=BSG PE=1 SV=5;>tr|A0A087WUV8|A0A087WUV8_HUMAN B	6	5	5	5	32.1	32.1	32.1	23.896	221	221;385;161;189;84;52	0	19.854	0.18073	0.67258	36.282	13	0	Median	0.94256	0.94234	35.068	13	0	Median	4.7143	1.2456	25.682	13	0	Median	1144500000	529700000	118930000	495920000				114	3636;4515;11222;11238;11969	True;True;True;True;True	3733;4636;11617;11635;12383	8053;8054;8055;8056;8057;8058;8059;8060;8061;9936;9937;9938;9939;9940;9941;9942;9943;9944;9945;25176;25177;25178;25222;25223;25224;26879;26880
A0A087X2D5;Q9BRJ2;A0A087WU62	A0A087X2D5;Q9BRJ2;A0A087WU62	2;2;1	2;2;1	2;2;1	39S ribosomal protein L45, mitochondrial	MRPL45	>tr|A0A087X2D5|A0A087X2D5_HUMAN 39S ribosomal protein L45, mitochondrial OS=Homo sapiens GN=MRPL45 PE=1 SV=1;>sp|Q9BRJ2|RM45_HUMAN 39S ribosomal protein L45, mitochondrial OS=Homo sapiens GN=MRPL45 PE=1 SV=2;>tr|A0A087WU62|A0A087WU62_HUMAN 39S ribosomal pr	3	2	2	2	8.2	8.2	8.2	35.29	306	306;306;256	0	3.074	0.22424	0.88106	6.2065	2	0	Median	0.94134	0.95058	1.0936	2	0	Median	4.2856	1.0656	6.7484	2	0	Median	30882000	14259000	3294800	13328000				115	4035;14876	True;True	4145;15402	8914;33968
A0A087X2I1;P62333;H0YJC0;H0YJS8;H0YJX2;H0YJE9;H0YJT1	A0A087X2I1;P62333;H0YJC0	12;12;6;5;2;1;1	12;12;6;5;2;1;1	12;12;6;5;2;1;1	26S protease regulatory subunit 10B	PSMC6	>tr|A0A087X2I1|A0A087X2I1_HUMAN 26S protease regulatory subunit 10B OS=Homo sapiens GN=PSMC6 PE=1 SV=1;>sp|P62333|PRS10_HUMAN 26S protease regulatory subunit 10B OS=Homo sapiens GN=PSMC6 PE=1 SV=1;>tr|H0YJC0|H0YJC0_HUMAN 26S protease regulatory subunit 10B	7	12	12	12	37.5	37.5	37.5	45.796	403	403;389;262;194;67;70;97	0	57.238	0.22542	0.81012	11.512	12	0	Median	0.97712	0.98361	6.0318	12	0	Median	4.0804	1.1055	12.884	12	0	Median	366030000	163540000	44225000	158260000				116	286;1064;1669;2178;3129;3398;3956;4259;5308;6960;10249;14725	True;True;True;True;True;True;True;True;True;True;True;True	292;1101;1723;2247;3222;3495;4063;4373;5445;7157;10619;15245	552;2478;2479;3900;5017;7016;7565;8746;8747;9374;11724;15521;23206;33669
C9JFE4;A0A096LP07;A0A096LPJ3;A8K070;Q13098;J3QQX0	C9JFE4;A0A096LP07;A0A096LPJ3;A8K070;Q13098;J3QQX0	2;2;2;2;2;1	2;2;2;2;2;1	2;2;2;2;2;1	COP9 signalosome complex subunit 1	GPS1	>tr|C9JFE4|C9JFE4_HUMAN COP9 signalosome complex subunit 1 OS=Homo sapiens GN=GPS1 PE=1 SV=2;>tr|A0A096LP07|A0A096LP07_HUMAN COP9 signalosome complex subunit 1 OS=Homo sapiens GN=GPS1 PE=1 SV=1;>tr|A0A096LPJ3|A0A096LPJ3_HUMAN COP9 signalosome complex subun	6	2	2	2	5.5	5.5	5.5	53.371	471	471;486;490;526;491;79	0.0070953	0.97232	0.37464	1.5149	35.756	2	2	Median	1.0607	1.0504	14.636	2	2	Median	2.8312	0.71606	50.392	2	2	Median	65597000	31612000	12023000	21962000				117	975;7663	True;True	1008;7885	2243;17278
A0A096LP25;Q6ZSR9	A0A096LP25;Q6ZSR9	1;1	1;1	1;1	Uncharacterized protein FLJ45252	AAK1	>tr|A0A096LP25|A0A096LP25_HUMAN AP2-associated protein kinase 1 (Fragment) OS=Homo sapiens GN=AAK1 PE=1 SV=1;>sp|Q6ZSR9|YJ005_HUMAN Uncharacterized protein FLJ45252 OS=Homo sapiens PE=2 SV=2	2	1	1	1	3.5	3.5	3.5	54.448	511	511;355	0	6.9818	NaN	NaN	NaN	1	0	Median	NaN	NaN	NaN	1	0	Median	NaN	NaN	NaN	1	0	Median	2529600	1109200	408440	1012000				118	13095	TRUE	13549	29433
A0A096LPI6;A0A096LNH5;A0A0B4J2D5;P30042;H7C2G3;A0A0B4J2H4;H7C1F6;A0A096LP73;A0A096LP12;F2Z2Q0;H7BYH1;A0A096LNJ1	A0A096LPI6;A0A096LNH5;A0A0B4J2D5;P30042;H7C2G3;A0A0B4J2H4;H7C1F6;A0A096LP73;A0A096LP12;F2Z2Q0;H7BYH1	8;7;7;7;5;5;5;4;4;4;4;2	8;7;7;7;5;5;5;4;4;4;4;2	7;7;7;7;5;5;5;4;4;4;4;2	ES1 protein homolog, mitochondrial	C21orf33	>tr|A0A096LPI6|A0A096LPI6_HUMAN Uncharacterized protein OS=Homo sapiens PE=4 SV=1;>tr|A0A096LNH5|A0A096LNH5_HUMAN Uncharacterized protein OS=Homo sapiens PE=4 SV=1;>tr|A0A0B4J2D5|A0A0B4J2D5_HUMAN Uncharacterized protein OS=Homo sapiens PE=4 SV=1;>sp|P30042	12	8	8	7	32.4	32.4	26.9	25.64	238	238;182;268;268;191;237;257;137;165;217;224;106	0	21.365	0.19641	0.80651	15.448	5	0	Median	1.0814	1.1173	3.896	5	0	Median	5.5698	1.4252	12.268	5	0	Median	187320000	79346000	21654000	86319000				119	644;3441;6533;7209;10032;10033;10287;14027	True;True;True;True;True;True;True;True	669;3538;6718;7411;10390;10391;10658;14519	1455;7647;7648;14680;14681;16087;22757;22758;22759;23280;31913
A0A0A0MQS1;Q53H96;B5MD87	A0A0A0MQS1;Q53H96;B5MD87	3;3;2	3;3;2	3;3;2	Pyrroline-5-carboxylate reductase;Pyrroline-5-carboxylate reductase 3	PYCRL	>tr|A0A0A0MQS1|A0A0A0MQS1_HUMAN Pyrroline-5-carboxylate reductase OS=Homo sapiens GN=PYCRL PE=1 SV=1;>sp|Q53H96|P5CR3_HUMAN Pyrroline-5-carboxylate reductase 3 OS=Homo sapiens GN=PYCRL PE=1 SV=3;>tr|B5MD87|B5MD87_HUMAN Pyrroline-5-carboxylate reductase 3 O	3	3	3	3	18.2	18.2	18.2	29.892	286	286;274;137	0	7.7602	0.17018	0.66882	18.901	3	1	Median	1.1148	1.1308	0.12216	3	1	Median	6.6298	1.7109	17.897	3	1	Median	77185000	32765000	6577800	37843000				120	5514;11168;14121	True;True;True	5657;11563;14617	12340;25077;32123
C9JP00;A0A0A0MQX8;Q9NR56	C9JP00;A0A0A0MQX8;Q9NR56	1;1;1	1;1;1	1;1;1	Muscleblind-like protein 1	MBNL1	>tr|C9JP00|C9JP00_HUMAN Muscleblind-like protein 1 OS=Homo sapiens GN=MBNL1 PE=1 SV=1;>tr|A0A0A0MQX8|A0A0A0MQX8_HUMAN Muscleblind-like protein 1 OS=Homo sapiens GN=MBNL1 PE=1 SV=1;>sp|Q9NR56|MBNL1_HUMAN Muscleblind-like protein 1 OS=Homo sapiens GN=MBNL1 P	3	1	1	1	3.2	3.2	3.2	37.898	348	348;400;388	0	6.5603	NaN	NaN	NaN	1	0	Median	NaN	NaN	NaN	1	0	Median	NaN	NaN	NaN	1	0	Median	31865000	14534000	3516900	13814000				121	1784	TRUE	1841	4167
A0A0A0MR02;P45880;Q5JSD2;Q5JSD1;A2A3S1	A0A0A0MR02;P45880	7;7;3;3;1	7;7;3;3;1	7;7;3;3;1	Voltage-dependent anion-selective channel protein 2	VDAC2	>tr|A0A0A0MR02|A0A0A0MR02_HUMAN Voltage-dependent anion-selective channel protein 2 (Fragment) OS=Homo sapiens GN=VDAC2 PE=1 SV=1;>sp|P45880|VDAC2_HUMAN Voltage-dependent anion-selective channel protein 2 OS=Homo sapiens GN=VDAC2 PE=1 SV=2	5	7	7	7	33.7	33.7	33.7	30.348	282	282;294;195;204;109	0	36.757	0.25306	1.0491	11.233	14	0	Median	0.97887	0.97816	6.4814	14	0	Median	3.8179	0.95817	9.3874	14	0	Median	931260000	414780000	109910000	406570000				122	4384;8957;8989;10066;12518;14247;15318	True;True;True;True;True;True;True	4501;9210;9244;10429;12951;14752;15861	9630;9631;20427;20428;20503;20504;20505;22863;22864;22865;22866;28080;32403;32404;32405;34996;34997;34998
A0A0A0MRA3;A0A0A0MTS7;Q8WZ42	A0A0A0MRA3;A0A0A0MTS7;Q8WZ42	1;1;1	1;1;1	1;1;1	Titin	TTN	>tr|A0A0A0MRA3|A0A0A0MRA3_HUMAN Titin OS=Homo sapiens GN=TTN PE=1 SV=1;>tr|A0A0A0MTS7|A0A0A0MTS7_HUMAN Titin OS=Homo sapiens GN=TTN PE=1 SV=1;>sp|Q8WZ42|TITIN_HUMAN Titin OS=Homo sapiens GN=TTN PE=1 SV=4	3	1	1	1	0	0	0	3014	27118	27118;35991;34350	0.0070922	0.97118	NaN	NaN	NaN	1	0	Median	NaN	NaN	NaN	1	0	Median	NaN	NaN	NaN	1	0	Median	33214000	14433000	4157500	14624000				123	10380	TRUE	10755	23446
M0R3F1;A0A0A0MRA5;B7Z4B8;Q9BUJ2;M0QYZ0;M0QYI8;M0QYM5	M0R3F1;A0A0A0MRA5;B7Z4B8;Q9BUJ2;M0QYZ0	7;7;7;7;4;2;1	7;7;7;7;4;2;1	7;7;7;7;4;2;1	Heterogeneous nuclear ribonucleoprotein U-like protein 1	HNRNPUL1	>tr|M0R3F1|M0R3F1_HUMAN Heterogeneous nuclear ribonucleoprotein U-like protein 1 (Fragment) OS=Homo sapiens GN=HNRNPUL1 PE=1 SV=1;>tr|A0A0A0MRA5|A0A0A0MRA5_HUMAN Heterogeneous nuclear ribonucleoprotein U-like protein 1 OS=Homo sapiens GN=HNRNPUL1 PE=1 SV=1	7	7	7	7	17.6	17.6	17.6	71.611	641	641;766;767;856;371;172;90	0	61.5	0.28546	1.1002	15.634	6	0	Median	1.0109	0.98755	6.2992	6	0	Median	3.5067	0.89919	9.8891	6	0	Median	71186000	33026000	9215400	28945000				124	421;5902;6253;6773;10331;14818;15276	True;True;True;True;True;True;True	438;6053;6424;6963;10703;15341;15816	891;892;893;894;13169;14021;15149;23350;33834;34914
G3V5X4;A0A0A0MRE3;Q8WXH0;A0A0C4DGK3;G3V4T3;G3V5D3	G3V5X4;A0A0A0MRE3;Q8WXH0;A0A0C4DGK3	18;18;18;9;2;1	18;18;18;9;2;1	18;18;18;9;2;1	Nesprin-2	SYNE2	>tr|G3V5X4|G3V5X4_HUMAN Nesprin-2 OS=Homo sapiens GN=SYNE2 PE=1 SV=1;>tr|A0A0A0MRE3|A0A0A0MRE3_HUMAN Nesprin-2 OS=Homo sapiens GN=SYNE2 PE=1 SV=1;>sp|Q8WXH0|SYNE2_HUMAN Nesprin-2 OS=Homo sapiens GN=SYNE2 PE=1 SV=3;>tr|A0A0C4DGK3|A0A0C4DGK3_HUMAN Nesprin-2	6	18	18	18	2.7	2.7	2.7	787.71	6818	6818;6824;6885;3541;1113;162	0	38.291	0.33318	1.3561	22.346	24	23	Median	1.2704	0.9295	8.4806	24	23	Median	3.8125	0.70545	19.144	24	23	Median	23077000	8956300	3071100	11050000				125	903;1366;1372;1472;6172;7320;7662;8177;8247;8644;8689;9012;9289;9821;11755;11919;12893;13590	True;True;True;True;True;True;True;True;True;True;True;True;True;True;True;True;True;True	935;1416;1422;1524;6332;7530;7884;8407;8477;8888;8935;9268;9553;10172;12166;12333;13346;14057	2067;2068;3172;3180;3181;3478;13849;16398;16399;17277;18675;18863;19748;19749;19833;20535;21189;22325;26427;26428;26786;28987;28988;30618
H0YBF7;A0A0A0MRE5;Q9ULH1;O43150	H0YBF7;A0A0A0MRE5;Q9ULH1;O43150	2;2;2;1	2;2;2;1	2;2;2;1	Arf-GAP with SH3 domain, ANK repeat and PH domain-containing protein 1;Arf-GAP with SH3 domain, ANK repeat and PH domain-containing protein 2	ASAP1;ASAP2	>tr|H0YBF7|H0YBF7_HUMAN Arf-GAP with SH3 domain, ANK repeat and PH domain-containing protein 1 (Fragment) OS=Homo sapiens GN=ASAP1 PE=1 SV=1;>tr|A0A0A0MRE5|A0A0A0MRE5_HUMAN Arf-GAP with SH3 domain, ANK repeat and PH domain-containing protein 1 OS=Homo sapi	4	2	2	2	2.4	2.4	2.4	105.13	950	950;1122;1129;1006	0	4.06	NaN	NaN	NaN	1	1	Median	NaN	NaN	NaN	1	1	Median	NaN	NaN	NaN	1	1	Median	1479500	702920	99719	676850				126	5108;5118	True;True	5240;5251	11297;11317
A0A0A0MRF4;P49406;S4R3W9	A0A0A0MRF4;P49406;S4R3W9	3;3;2	3;3;2	3;3;2	39S ribosomal protein L19, mitochondrial	MRPL19	>tr|A0A0A0MRF4|A0A0A0MRF4_HUMAN 39S ribosomal protein L19, mitochondrial OS=Homo sapiens GN=MRPL19 PE=1 SV=1;>sp|P49406|RM19_HUMAN 39S ribosomal protein L19, mitochondrial OS=Homo sapiens GN=MRPL19 PE=1 SV=2;>tr|S4R3W9|S4R3W9_HUMAN 39S ribosomal protein L1	3	3	3	3	19.7	19.7	19.7	19.131	173	173;292;143	0	5.5581	0.22402	0.8804	7.0521	3	0	Median	0.89669	0.92074	8.1176	3	0	Median	3.8857	1.0076	1.5073	3	0	Median	34893000	15623000	4292200	14978000				127	3830;14061;14595	True;True;True	3934;14554;15109	8507;31979;33316
A0A0A0MRI0;P42771;K7ES20;K7ENC6;J3QRG6;P42772	A0A0A0MRI0;P42771;K7ES20;K7ENC6;J3QRG6;P42772	2;2;1;1;1;1	2;2;1;1;1;1	2;2;1;1;1;1	Cyclin-dependent kinase inhibitor 2A;Cyclin-dependent kinase 4 inhibitor B	CDKN2A;CDKN2B	>tr|A0A0A0MRI0|A0A0A0MRI0_HUMAN Cyclin-dependent kinase inhibitor 2A OS=Homo sapiens GN=CDKN2A PE=1 SV=1;>sp|P42771|CDN2A_HUMAN Cyclin-dependent kinase inhibitor 2A OS=Homo sapiens GN=CDKN2A PE=1 SV=2;>tr|K7ES20|K7ES20_HUMAN Cyclin-dependent kinase inhibit	6	2	2	2	14.1	14.1	14.1	18.519	170	170;156;104;121;138;138	0	9.6765	0.22582	0.97663	1.7006	2	0	Median	1.048	1.0737	1.4793	2	0	Median	4.6116	1.0842	0.74126	2	0	Median	27744000	11565000	2916300	13263000				128	2854;5646	True;True	2941;5791	6420;6421;12614
A0A0A0MRI2;Q9UNH7;G3V5X9	A0A0A0MRI2;Q9UNH7	3;3;1	3;3;1	3;3;1	Sorting nexin-6;Sorting nexin-6, N-terminally processed	SNX6	>tr|A0A0A0MRI2|A0A0A0MRI2_HUMAN Sorting nexin 6, isoform CRA_b OS=Homo sapiens GN=SNX6 PE=1 SV=1;>sp|Q9UNH7|SNX6_HUMAN Sorting nexin-6 OS=Homo sapiens GN=SNX6 PE=1 SV=1	3	3	3	3	10	10	10	47.804	418	418;406;239	0	3.57	0.2926	1.1458	8.9779	3	1	Median	1.0002	1.0273	19.37	3	1	Plateau	3.4911	0.89195	19.02	3	1	Plateau	29059000	12893000	4816000	11350000				129	10043;11041;11707	True;True;True	10401;11433;12115	22774;24816;26319
A0A0A0MRJ6;H7BY58;P22061;F6S8N6;C9J0F2	A0A0A0MRJ6;H7BY58;P22061;F6S8N6;C9J0F2	6;6;6;5;4	6;6;6;5;4	6;6;6;5;4	Protein-L-isoaspartate O-methyltransferase;Protein-L-isoaspartate(D-aspartate) O-methyltransferase	PCMT1	>tr|A0A0A0MRJ6|A0A0A0MRJ6_HUMAN Protein-L-isoaspartate O-methyltransferase OS=Homo sapiens GN=PCMT1 PE=1 SV=1;>tr|H7BY58|H7BY58_HUMAN Protein-L-isoaspartate O-methyltransferase OS=Homo sapiens GN=PCMT1 PE=1 SV=1;>sp|P22061|PIMT_HUMAN Protein-L-isoaspartate	5	6	6	6	19.6	19.6	19.6	30.315	285	285;286;227;250;96	0	19.838	0.30087	1.2222	12.944	5	0	Median	0.96191	0.99385	4.5372	5	0	Median	3.212	0.82768	12.944	5	0	Median	153150000	65118000	25257000	62774000				130	892;3149;6817;13843;13844;14388	True;True;True;True;True;True	924;3242;7009;14319;14320;14895	2052;7050;15230;15231;31277;31278;32768
A0A0A0MRM9;Q14978;S4R402;S4R349	A0A0A0MRM9;Q14978	5;5;2;2	5;5;2;2	3;3;0;0	Nucleolar and coiled-body phosphoprotein 1	NOLC1	>tr|A0A0A0MRM9|A0A0A0MRM9_HUMAN Nucleolar and coiled-body phosphoprotein 1 (Fragment) OS=Homo sapiens GN=NOLC1 PE=1 SV=1;>sp|Q14978|NOLC1_HUMAN Nucleolar and coiled-body phosphoprotein 1 OS=Homo sapiens GN=NOLC1 PE=1 SV=2	4	5	5	3	9.5	9.5	5.9	74.543	708	708;699;46;258	0	16.634	0.22052	0.91755	4.772	5	0	Median	1.191	1.152	5.9136	5	0	Median	5.5367	1.294	5.9879	5	0	Median	88356000	37217000	8827800	42311000				131	125;1576;2441;14415;14713	True;True;True;True;True	128;1630;2515;14924;15233	221;3700;3701;5539;5540;32817;32818;33643;33644;33645;33646
A0A0A0MRN5;Q9NZT2;A0A087X028	A0A0A0MRN5;Q9NZT2;A0A087X028	6;6;3	6;6;3	6;6;3	Opioid growth factor receptor	OGFR	>tr|A0A0A0MRN5|A0A0A0MRN5_HUMAN Opioid growth factor receptor OS=Homo sapiens GN=OGFR PE=1 SV=1;>sp|Q9NZT2|OGFR_HUMAN Opioid growth factor receptor OS=Homo sapiens GN=OGFR PE=1 SV=3;>tr|A0A087X028|A0A087X028_HUMAN Opioid growth factor receptor OS=Homo sapi	3	6	6	6	13	13	13	67.194	625	625;677;390	0	37.299	0.30318	1.2622	4.3972	5	0	Median	1.1081	1.0627	9.5501	5	0	Median	3.7164	0.92892	5.8994	5	0	Median	81856000	33487000	12062000	36307000				132	546;3239;3918;10686;11597;12157	True;True;True;True;True;True	565;3333;4023;11069;12005;12574	1203;7203;8670;24040;26015;26016;26017;26018;27289;27290
A0A0A0MRV0;Q9P2E9;A0A087WVV2;F8W7S5;A0A087WU26;A2A2S5;V9GY78;H0YDJ4;H9KV85;E9PN67;C9J066;Q8N4C6	A0A0A0MRV0;Q9P2E9;A0A087WVV2;F8W7S5	29;29;26;23;10;3;2;1;1;1;1;1	29;29;26;23;10;3;2;1;1;1;1;1	29;29;26;23;10;3;2;1;1;1;1;1	Ribosome-binding protein 1	RRBP1	>tr|A0A0A0MRV0|A0A0A0MRV0_HUMAN Ribosome-binding protein 1 OS=Homo sapiens GN=RRBP1 PE=1 SV=1;>sp|Q9P2E9|RRBP1_HUMAN Ribosome-binding protein 1 OS=Homo sapiens GN=RRBP1 PE=1 SV=4;>tr|A0A087WVV2|A0A087WVV2_HUMAN Ribosome-binding protein 1 OS=Homo sapiens GN	12	29	29	29	28.4	28.4	28.4	152.45	1410	1410;1410;934;751;346;300;229;1537;1581;1989;2046;2090	0	306.34	0.24674	0.96224	10.118	28	0	Median	0.95656	0.99441	9.8282	28	0	Median	3.7754	1.0437	12.737	28	0	Median	671480000	299450000	89056000	282970000				133	91;573;1314;2032;2039;3028;3221;3417;5360;5410;6757;7929;8110;8638;8707;10214;10594;10752;11412;11429;11452;11508;12148;12304;12811;12850;13000;13580;13686	True;True;True;True;True;True;True;True;True;True;True;True;True;True;True;True;True;True;True;True;True;True;True;True;True;True;True;True;True	94;593;1363;2097;2104;3119;3315;3514;5497;5548;6947;8154;8339;8882;8954;10583;10975;11135;11818;11835;11859;11916;12565;12727;13258;13299;13454;14047;14159	152;1270;1271;1272;3019;4710;4722;6817;6818;7163;7593;11807;12015;12016;15112;18008;18531;19738;19875;19876;23138;23864;24182;25589;25622;25623;25674;25818;25819;27274;27601;28772;28884;28885;29236;29237;30588;30589;30871;30872
X6RA56;X6RCK5;A0A0A0MRV8;X6RLR1;O75935	X6RA56;X6RCK5;A0A0A0MRV8;X6RLR1;O75935	2;2;2;2;2	2;2;2;2;2	2;2;2;2;2	Dynactin subunit 3	DCTN3	>tr|X6RA56|X6RA56_HUMAN Dynactin subunit 3 OS=Homo sapiens GN=DCTN3 PE=1 SV=1;>tr|X6RCK5|X6RCK5_HUMAN Dynactin subunit 3 (Fragment) OS=Homo sapiens GN=DCTN3 PE=1 SV=1;>tr|A0A0A0MRV8|A0A0A0MRV8_HUMAN Dynactin subunit 3 (Fragment) OS=Homo sapiens GN=DCTN3 PE	5	2	2	2	14.8	14.8	14.8	16.091	142	142;151;161;176;186	0.0040779	1.1024	0.2706	1.0354	5.509	2	1	Median	0.96513	0.99596	4.8217	2	1	Median	3.5644	0.90535	11.176	2	1	Median	22490000	9624900	3245000	9620200				134	14406;15182	True;True	14915;15713	32800;34663
A0A0A0MRX2;Q96HY6	A0A0A0MRX2;Q96HY6	2;2	2;2	2;2	DDRGK domain-containing protein 1	DDRGK1	>tr|A0A0A0MRX2|A0A0A0MRX2_HUMAN DDRGK domain-containing protein 1 OS=Homo sapiens GN=DDRGK1 PE=1 SV=1;>sp|Q96HY6|DDRGK_HUMAN DDRGK domain-containing protein 1 OS=Homo sapiens GN=DDRGK1 PE=1 SV=2	2	2	2	2	10.7	10.7	10.7	33.939	298	298;314	0	4.1134	0.39095	1.398	78.178	2	1	Median	1.0525	1.0288	21.985	2	1	Median	2.654	0.71336	54.171	2	1	Median	43590000	16301000	9553300	17736000				135	171;13385	True;True	175;13849	307;30110
A0A0A0MS41;Q9BWM7;S4R3N9	A0A0A0MS41;Q9BWM7;S4R3N9	2;2;1	1;1;1	1;1;1	Sideroflexin;Sideroflexin-3	SFXN3	>tr|A0A0A0MS41|A0A0A0MS41_HUMAN Sideroflexin OS=Homo sapiens GN=SFXN3 PE=1 SV=1;>sp|Q9BWM7|SFXN3_HUMAN Sideroflexin-3 OS=Homo sapiens GN=SFXN3 PE=1 SV=2;>tr|S4R3N9|S4R3N9_HUMAN Sideroflexin-3 OS=Homo sapiens GN=SFXN3 PE=1 SV=1	3	2	1	1	8.7	2.8	2.8	35.503	321	321;325;177	0	2.1142	NaN	NaN	NaN	1	0	Median	NaN	NaN	NaN	1	0	Median	NaN	NaN	NaN	1	0	Median	39339000	16739000	4049600	18550000				136	4090;14816	False;True	4200;15339	8994;8995;33830
A0A0A0MS51;A0A0A0MT01;P06396;Q5T0H8;Q5T0H9;Q5T0I1	A0A0A0MS51;A0A0A0MT01;P06396	9;9;9;4;4;3	1;1;1;1;1;0	1;1;1;1;1;0	Gelsolin	GSN	>tr|A0A0A0MS51|A0A0A0MS51_HUMAN Gelsolin OS=Homo sapiens GN=GSN PE=1 SV=1;>tr|A0A0A0MT01|A0A0A0MT01_HUMAN Gelsolin OS=Homo sapiens GN=GSN PE=1 SV=1;>sp|P06396|GELS_HUMAN Gelsolin OS=Homo sapiens GN=GSN PE=1 SV=1	6	9	1	1	15.1	1.1	1.1	82.525	748	748;767;782;207;485;228	0.00099157	1.8172	NaN	NaN	NaN	1	0	Median	NaN	NaN	NaN	1	0	Median	NaN	NaN	NaN	1	0	Median	9631800	3231900	985620	5414300				137	538;586;2516;3419;5493;10723;11181;12513;15121	False;False;False;False;False;False;False;True;False	557;606;2595;3516;5636;11106;11576;12946;15652	1186;1187;1188;1288;1289;1290;5689;7595;7596;7597;12302;12303;24124;24125;25097;28075;34535
A0A0A0MSA9;A0A0C4DG49;P15151	A0A0A0MSA9;A0A0C4DG49;P15151	1;1;1	1;1;1	1;1;1	Poliovirus receptor	PVR	>tr|A0A0A0MSA9|A0A0A0MSA9_HUMAN Poliovirus receptor OS=Homo sapiens GN=PVR PE=1 SV=1;>tr|A0A0C4DG49|A0A0C4DG49_HUMAN Poliovirus receptor OS=Homo sapiens GN=PVR PE=1 SV=1;>sp|P15151|PVR_HUMAN Poliovirus receptor OS=Homo sapiens GN=PVR PE=1 SV=2	3	1	1	1	3.3	3.3	3.3	42.882	392	392;417;417	0.0079225	0.93033	0.2604	0.93594	13.808	2	0	Median	0.97405	0.9733	4.8969	2	0	Median	3.7896	1.0531	9.9983	2	0	Median	34130000	15372000	4385300	14373000				138	13977	TRUE	14466	31728;31729
E9PF18;A0A0A0MSE2;Q16836	E9PF18;A0A0A0MSE2;Q16836	3;3;3	3;3;3	3;3;3	Hydroxyacyl-coenzyme A dehydrogenase, mitochondrial	HADH	>tr|E9PF18|E9PF18_HUMAN Hydroxyacyl-coenzyme A dehydrogenase, mitochondrial OS=Homo sapiens GN=HADH PE=1 SV=1;>tr|A0A0A0MSE2|A0A0A0MSE2_HUMAN Hydroxyacyl-coenzyme A dehydrogenase, mitochondrial OS=Homo sapiens GN=HADH PE=1 SV=1;>sp|Q16836|HCDH_HUMAN Hydrox	3	3	3	3	13.5	13.5	13.5	35.236	318	318;390;314	0	13.174	0.27399	1.13	13.747	3	1	Median	1.1622	1.1259	4.4691	3	1	Median	4.2552	1.0641	6.6578	3	1	Plateau	53887000	22876000	6016900	24994000				139	7715;8391;12466	True;True;True	7937;8624;12898	17439;19193;27970
J3KNW4;A0A0A0MSG2;Q14192	J3KNW4;A0A0A0MSG2;Q14192	2;2;2	2;2;2	2;2;2	Four and a half LIM domains protein 2	FHL2	>tr|J3KNW4|J3KNW4_HUMAN Four and a half LIM domains protein 2 OS=Homo sapiens GN=FHL2 PE=1 SV=1;>tr|A0A0A0MSG2|A0A0A0MSG2_HUMAN Four and a half LIM domains protein 2 OS=Homo sapiens GN=FHL2 PE=1 SV=1;>sp|Q14192|FHL2_HUMAN Four and a half LIM domains protei	3	2	2	2	7.5	7.5	7.5	44.205	389	389;395;279	0	4.5775	0.46477	1.8022	4.1038	3	0	Median	0.87363	0.9283	3.6288	3	0	Median	1.9637	0.52762	1.1427	3	0	Median	68577000	28218000	13740000	26619000				140	4413;7110	True;True	4531;7308	9728;15804;15805
A0A0A0MSJ2;E7EU13;Q96P48;F5GWN4;F8WBT0	A0A0A0MSJ2;E7EU13;Q96P48;F5GWN4;F8WBT0	2;2;2;1;1	2;2;2;1;1	2;2;2;1;1	Arf-GAP with Rho-GAP domain, ANK repeat and PH domain-containing protein 1	ARAP1	>tr|A0A0A0MSJ2|A0A0A0MSJ2_HUMAN Arf-GAP with Rho-GAP domain, ANK repeat and PH domain-containing protein 1 OS=Homo sapiens GN=ARAP1 PE=1 SV=1;>tr|E7EU13|E7EU13_HUMAN Arf-GAP with Rho-GAP domain, ANK repeat and PH domain-containing protein 1 OS=Homo sapiens	5	2	2	2	4	4	4	77.531	679	679;1194;1450;254;307	0	2.5569	0.30453	1.1164	3.1379	2	1	Median	1.0213	0.94935	3.1804	2	1	Median	3.3407	0.93193	5.7642	2	1	Median	3968500	1575800	637980	1754700				141	523;12131	True;True	542;12548	1135;27245
A0A0A0MSK5;J3KN66;Q5JTV8;H0YD16;H0Y4R4	A0A0A0MSK5;J3KN66;Q5JTV8	3;3;3;1;1	3;3;3;1;1	3;3;3;1;1	Torsin-1A-interacting protein 1	TOR1AIP1	>tr|A0A0A0MSK5|A0A0A0MSK5_HUMAN Torsin-1A-interacting protein 1 OS=Homo sapiens GN=TOR1AIP1 PE=1 SV=1;>tr|J3KN66|J3KN66_HUMAN Torsin-1A-interacting protein 1 OS=Homo sapiens GN=TOR1AIP1 PE=1 SV=1;>sp|Q5JTV8|TOIP1_HUMAN Torsin-1A-interacting protein 1 OS=Ho	5	3	3	3	8.9	8.9	8.9	52.406	462	462;599;583;198;296	0	17.142	0.19136	0.77376	17.214	3	0	Median	0.87697	0.85916	8.1831	3	0	Median	4.2801	1.0825	18.45	3	0	Median	89136000	42137000	9833700	37165000				142	6457;11221;11923	True;True;True	6634;11616;12337	14488;25175;26793
A0A0A0MSM4;Q9C0D5	A0A0A0MSM4;Q9C0D5	1;1	1;1	1;1	Protein TANC1	TANC1	>tr|A0A0A0MSM4|A0A0A0MSM4_HUMAN Protein TANC1 OS=Homo sapiens GN=TANC1 PE=1 SV=1;>sp|Q9C0D5|TANC1_HUMAN Protein TANC1 OS=Homo sapiens GN=TANC1 PE=1 SV=3	2	1	1	1	3	3	3	50.847	462	462;1861	0	2.7918	0.26863	1.0519	19.101	2	2	Median	1.294	1.3441	1.3751	2	2	Median	4.8169	1.3002	17.726	2	2	Median	3793300	1518100	376510	1898700				143	1172	TRUE	1217	2724;2725
B3KYB6;A0A0A0MSW4;P48739;B3KYB7	B3KYB6;A0A0A0MSW4;P48739;B3KYB7	3;3;3;2	3;3;3;2	2;2;2;1	Phosphatidylinositol transfer protein beta isoform	PITPNB	>tr|B3KYB6|B3KYB6_HUMAN Phosphatidylinositol transfer protein beta isoform (Fragment) OS=Homo sapiens GN=PITPNB PE=1 SV=1;>tr|A0A0A0MSW4|A0A0A0MSW4_HUMAN Phosphatidylinositol transfer protein beta isoform OS=Homo sapiens GN=PITPNB PE=1 SV=1;>sp|P48739|PIPN	4	3	3	2	35.8	35.8	28.3	13.781	120	120;271;271;168	0	6.1044	0.23087	0.95784	9.605	3	1	Plateau	0.97097	0.99648	12.503	3	1	Plateau	4.0767	1.0975	11.546	3	1	Plateau	75187000	35490000	8721800	30975000				144	1832;9474;11932	True;True;True	1889;9776;12346	4255;21586;26805
A0A0A0MTN9;J3QQX3;A0A0A0MTR6;A0A0C4DFN8;A0A0A0MSZ4;A0A0A0MT64;P22570;A0A0C4DGN7;J3QKZ8;J3QQW7	A0A0A0MTN9;J3QQX3;A0A0A0MTR6;A0A0C4DFN8;A0A0A0MSZ4;A0A0A0MT64;P22570;A0A0C4DGN7;J3QKZ8	4;4;4;4;4;4;4;3;2;1	4;4;4;4;4;4;4;3;2;1	4;4;4;4;4;4;4;3;2;1	NADPH:adrenodoxin oxidoreductase, mitochondrial	FDXR	>tr|A0A0A0MTN9|A0A0A0MTN9_HUMAN NADPH:adrenodoxin oxidoreductase, mitochondrial OS=Homo sapiens GN=FDXR PE=1 SV=1;>tr|J3QQX3|J3QQX3_HUMAN NADPH:adrenodoxin oxidoreductase, mitochondrial OS=Homo sapiens GN=FDXR PE=1 SV=2;>tr|A0A0A0MTR6|A0A0A0MTR6_HUMAN NADP	10	4	4	4	10	10	10	48.027	439	439;463;483;491;522;534;491;497;164;178	0	2.8804	0.25478	0.99772	16.204	5	4	Median	1.1299	1.1224	8.5099	5	4	Median	4.8092	1.2106	14.031	5	4	Median	95929000	39376000	9949000	46604000				145	3701;6161;7584;11856	True;True;True;True	3799;6319;7804;12269	8175;13817;13818;17129;26665
A0A0A0MT33;O95104;Q9UPN6	A0A0A0MT33;O95104;Q9UPN6	1;1;1	1;1;1	1;1;1	Splicing factor, arginine/serine-rich 15;Protein SCAF8	SCAF8;SCAF4	>tr|A0A0A0MT33|A0A0A0MT33_HUMAN Protein SCAF8 OS=Homo sapiens GN=SCAF8 PE=1 SV=1;>sp|O95104|SFR15_HUMAN Splicing factor, arginine/serine-rich 15 OS=Homo sapiens GN=SCAF4 PE=1 SV=3;>sp|Q9UPN6|SCAF8_HUMAN Protein SCAF8 OS=Homo sapiens GN=SCAF8 PE=1 SV=1	3	1	1	1	0.9	0.9	0.9	148.86	1349	1349;1147;1271	0.00050839	2.0342	NaN	NaN	NaN	1	0	Median	NaN	NaN	NaN	1	0	Median	NaN	NaN	NaN	1	0	Median	4175100	1785600	545490	1844000				146	14297	TRUE	14804	32539
Q9HBD4;A0A0A0MT49;P51532;P51531;K7EP28;F6XE55;A0A0A0MSS5;F6UH26;B1ALG1;F6T8Q0;B1ALG2;F6XG14;B1ALF6	Q9HBD4;A0A0A0MT49;P51532	8;8;8;3;1;1;1;1;1;1;1;1;1	8;8;8;3;1;1;1;1;1;1;1;1;1	8;8;8;3;1;1;1;1;1;1;1;1;1	Transcription activator BRG1	SMARCA4	>tr|Q9HBD4|Q9HBD4_HUMAN SMARCA4 isoform 2 OS=Homo sapiens GN=SMARCA4 PE=1 SV=1;>tr|A0A0A0MT49|A0A0A0MT49_HUMAN Transcription activator BRG1 OS=Homo sapiens GN=SMARCA4 PE=1 SV=1;>sp|P51532|SMCA4_HUMAN Transcription activator BRG1 OS=Homo sapiens GN=SMARCA4	13	8	8	8	5.5	5.5	5.5	188.15	1679	1679;1681;1647;1590;136;153;171;177;236;248;254;271;278	0	12.476	0.22399	0.84386	11.919	5	0	Median	1.095	1.127	7.4371	5	0	Median	4.7845	1.3559	9.3211	5	0	Median	58292000	25781000	7840000	24670000				147	707;2531;3113;4678;4914;6196;7481;9014	True;True;True;True;True;True;True;True	735;2610;3206;4804;5044;6356;7697;9270	1631;5747;6989;10334;10889;13893;16819;20537
A0A0A0MT60;Q5T1M5	A0A0A0MT60;Q5T1M5	1;1	1;1	1;1	Peptidyl-prolyl cis-trans isomerase;FK506-binding protein 15	FKBP15	>tr|A0A0A0MT60|A0A0A0MT60_HUMAN Peptidyl-prolyl cis-trans isomerase (Fragment) OS=Homo sapiens GN=FKBP15 PE=1 SV=1;>sp|Q5T1M5|FKB15_HUMAN FK506-binding protein 15 OS=Homo sapiens GN=FKBP15 PE=1 SV=2	2	1	1	1	0.9	0.9	0.9	136.27	1244	1244;1219	0	4.6473	NaN	NaN	NaN	1	0	Median	NaN	NaN	NaN	1	0	Median	NaN	NaN	NaN	1	0	Median	2639700	1163100	196300	1280300				148	12663	TRUE	13101	28421
A0A0A0MTB8;Q8NI36	A0A0A0MTB8;Q8NI36	1;1	1;1	1;1	WD repeat-containing protein 36	WDR36	>tr|A0A0A0MTB8|A0A0A0MTB8_HUMAN WD repeat-containing protein 36 OS=Homo sapiens GN=WDR36 PE=1 SV=1;>sp|Q8NI36|WDR36_HUMAN WD repeat-containing protein 36 OS=Homo sapiens GN=WDR36 PE=1 SV=1	2	1	1	1	1.7	1.7	1.7	99.365	895	895;951	0	2.4059	NaN	NaN	NaN	1	0	Median	NaN	NaN	NaN	1	0	Median	NaN	NaN	NaN	1	0	Median	2707300	1207300	396760	1103200				149	11089	TRUE	11484	24939
A0A0A0MTR7;A0A0A0MTC1;Q63HN8	A0A0A0MTR7;A0A0A0MTC1;Q63HN8	2;2;2	2;2;2	2;2;2	E3 ubiquitin-protein ligase RNF213	RNF213	>tr|A0A0A0MTR7|A0A0A0MTR7_HUMAN E3 ubiquitin-protein ligase RNF213 OS=Homo sapiens GN=RNF213 PE=1 SV=1;>tr|A0A0A0MTC1|A0A0A0MTC1_HUMAN E3 ubiquitin-protein ligase RNF213 OS=Homo sapiens GN=RNF213 PE=1 SV=1;>sp|Q63HN8|RN213_HUMAN E3 ubiquitin-protein ligase	3	2	2	2	0.8	0.8	0.8	591.4	5207	5207;5256;5207	0.00098668	1.7641	0.25059	1.0652	11.258	2	1	Median	1.0828	0.9439	31.311	2	1	Median	4.2808	0.9157	49.934	2	1	Median	118020000	46983000	11308000	59726000				150	13717;14824	True;True	14191;15347	30934;33844
A0A0A0MTI6;Q9NYP7	A0A0A0MTI6;Q9NYP7	1;1	1;1	1;1	Elongation of very long chain fatty acids protein;Elongation of very long chain fatty acids protein 5	ELOVL5	>tr|A0A0A0MTI6|A0A0A0MTI6_HUMAN Elongation of very long chain fatty acids protein OS=Homo sapiens GN=ELOVL5 PE=1 SV=1;>sp|Q9NYP7|ELOV5_HUMAN Elongation of very long chain fatty acids protein 5 OS=Homo sapiens GN=ELOVL5 PE=1 SV=1	2	1	1	1	5	5	5	30.742	262	262;299	0	4.4389	0.23331	0.84748	5.3172	2	2	Median	1.1142	1.1073	4.136	2	2	Median	4.7757	1.3504	3.3898	2	2	Median	4669900	1895100	490790	2283900				151	9404	TRUE	9690	21425;21426
Q5T2B5;A0A0A0MTN0;Q13617;Q5T2B7	Q5T2B5;A0A0A0MTN0;Q13617	5;5;5;1	5;5;5;1	5;5;5;1	Cullin-2	CUL2	>tr|Q5T2B5|Q5T2B5_HUMAN Cullin-2 OS=Homo sapiens GN=CUL2 PE=1 SV=1;>tr|A0A0A0MTN0|A0A0A0MTN0_HUMAN Cullin-2 OS=Homo sapiens GN=CUL2 PE=1 SV=1;>sp|Q13617|CUL2_HUMAN Cullin-2 OS=Homo sapiens GN=CUL2 PE=1 SV=2	4	5	5	5	11	11	11	82.358	706	706;758;745;90	0	4.757	0.18327	0.70212	11.523	3	0	Median	1.2033	1.1363	13.552	3	0	Median	6.3003	1.825	19.893	3	0	Median	30900000	14436000	3567000	12897000				152	1629;1782;1807;8420;15215	True;True;True;True;True	1683;1839;1864;8658;15747	3799;4163;4164;4165;4211;19278;34721
A0A0A6YYA0;Q9Y3B3	A0A0A6YYA0;Q9Y3B3	3;3	3;3	3;3	Transmembrane emp24 domain-containing protein 7	TMED7-TICAM2;TMED7	>tr|A0A0A6YYA0|A0A0A6YYA0_HUMAN Protein TMED7-TICAM2 OS=Homo sapiens GN=TMED7-TICAM2 PE=3 SV=1;>sp|Q9Y3B3|TMED7_HUMAN Transmembrane emp24 domain-containing protein 7 OS=Homo sapiens GN=TMED7 PE=1 SV=2	2	3	3	3	22.3	22.3	22.3	21.233	188	188;224	0	2.5187	0.19807	0.84361	24.267	4	0	Median	1.0823	1.0934	12.69	4	0	Median	5.7201	1.4264	19.291	4	0	Median	60864000	26465000	6804400	27594000				153	3548;12174;14430	True;True;True	3645;12593;14939	7892;27327;27328;32846
B8ZZ09;B8ZZ10;A8MYV2;A0A0A6YYC3;A0A0A6YYJ8;Q9NQ29;Q9Y383	B8ZZ09;B8ZZ10;A8MYV2;A0A0A6YYC3;A0A0A6YYJ8;Q9NQ29;Q9Y383	1;1;1;1;1;1;1	1;1;1;1;1;1;1	1;1;1;1;1;1;1	Putative RNA-binding protein Luc7-like 1;Putative RNA-binding protein Luc7-like 2	LUC7L;C7orf55-LUC7L2;LUC7L2	>tr|B8ZZ09|B8ZZ09_HUMAN LUC7-like (S. cerevisiae) (Fragment) OS=Homo sapiens GN=LUC7L PE=1 SV=1;>tr|B8ZZ10|B8ZZ10_HUMAN LUC7-like (S. cerevisiae) (Fragment) OS=Homo sapiens GN=LUC7L PE=1 SV=1;>tr|A8MYV2|A8MYV2_HUMAN LUC7-like (S. cerevisiae) OS=Homo sapien	7	1	1	1	11.9	11.9	11.9	9.4786	84	84;182;272;389;458;371;392	0.0027536	1.1882	NaN	NaN	NaN	1	1	Median	NaN	NaN	NaN	1	1	Median	NaN	NaN	NaN	1	1	Median	8251900	2295500	643920	5312500				154	13789	TRUE	14265	31139
I3L1U7;I3L0X9;I3L3T0;A0A0A6YYL4;Q9Y3D7	I3L1U7;I3L0X9;I3L3T0;A0A0A6YYL4;Q9Y3D7	3;3;3;3;3	3;3;3;3;3	3;3;3;3;3	Coronin;Mitochondrial import inner membrane translocase subunit TIM16	PAM16;CORO7-PAM16	>tr|I3L1U7|I3L1U7_HUMAN Mitochondrial import inner membrane translocase subunit TIM16 OS=Homo sapiens GN=PAM16 PE=4 SV=1;>tr|I3L0X9|I3L0X9_HUMAN Mitochondrial import inner membrane translocase subunit TIM16 OS=Homo sapiens GN=PAM16 PE=4 SV=1;>tr|I3L3T0|I3L	5	3	3	3	34.1	34.1	34.1	14.013	129	129;137;145;1048;125	0	11.033	0.32181	1.3781	16.674	4	2	Median	0.97487	0.97861	8.0427	4	2	Median	3.0463	0.71042	9.2666	4	2	Median	33822000	13712000	5249600	14861000				155	1068;11034;12168	True;True;True	1105;11426;12586	2484;2485;24805;27318
F8VZB4;A0A0B4J1R2;REV__E7EP17;REV__Q9NYC9;Q9H6R3	F8VZB4;A0A0B4J1R2;REV__E7EP17;REV__Q9NYC9;Q9H6R3	1;1;1;1;1	1;1;1;1;1	1;1;1;1;1	Acyl-CoA synthetase short-chain family member 3, mitochondrial	ACSS3	>tr|F8VZB4|F8VZB4_HUMAN Acyl-CoA synthetase short-chain family member 3, mitochondrial (Fragment) OS=Homo sapiens GN=ACSS3 PE=1 SV=1;>tr|A0A0B4J1R2|A0A0B4J1R2_HUMAN Acyl-CoA synthetase short-chain family member 3, mitochondrial OS=Homo sapiens GN=ACSS3 PE=	5	1	1	1	7.5	7.5	7.5	10.201	93	93;685;4410;4486;686	0.0070765	0.95731	NaN	NaN	NaN	1	1	Median	NaN	NaN	NaN	1	1	Median	NaN	NaN	NaN	1	1	Median	4525500	1890100	592400	2043000				156	7339	TRUE	7549	16439
A0A0B4J1W3;Q9BXJ9;Q6N069	A0A0B4J1W3;Q9BXJ9	13;13;1	13;13;1	13;13;1	N-alpha-acetyltransferase 15, NatA auxiliary subunit	NAA15	>tr|A0A0B4J1W3|A0A0B4J1W3_HUMAN N-alpha-acetyltransferase 15, NatA auxiliary subunit OS=Homo sapiens GN=NAA15 PE=1 SV=1;>sp|Q9BXJ9|NAA15_HUMAN N-alpha-acetyltransferase 15, NatA auxiliary subunit OS=Homo sapiens GN=NAA15 PE=1 SV=1	3	13	13	13	16.4	16.4	16.4	101.2	865	865;866;864	0	31.648	0.23746	0.9628	8.2366	11	0	Median	1.0296	1.0098	5.3022	11	0	Median	4.1246	1.0674	7.3395	11	0	Median	207850000	89359000	25286000	93208000				157	988;2388;4260;7562;9822;10095;10931;12273;13004;13199;13594;13595;15319	True;True;True;True;True;True;True;True;True;True;True;True;True	1022;2459;4374;7782;10173;10458;11317;12696;13458;13656;14062;14063;15862	2268;2269;5415;5416;9375;17086;17087;22326;22327;22925;24563;24564;24565;27532;27533;29243;29650;30638;30639;30640;34999;35000
A0A0B4J1Z1;C9JAB2;Q16629	A0A0B4J1Z1;C9JAB2;Q16629	5;5;5	5;5;5	4;4;4	Serine/arginine-rich splicing factor 7	SRSF7	>tr|A0A0B4J1Z1|A0A0B4J1Z1_HUMAN Serine/arginine-rich-splicing factor 7 OS=Homo sapiens GN=SRSF7 PE=1 SV=1;>tr|C9JAB2|C9JAB2_HUMAN Serine/arginine-rich-splicing factor 7 OS=Homo sapiens GN=SRSF7 PE=1 SV=1;>sp|Q16629|SRSF7_HUMAN Serine/arginine-rich splicing	3	5	5	4	34.3	34.3	34.3	15.763	137	137;235;238	0	12.412	0.20507	0.95082	19.864	8	0	Median	0.9048	0.90163	4.9308	8	0	Median	4.3556	0.99588	24.904	8	0	Median	379800000	175690000	39385000	164730000				158	514;10106;10108;14798;14799	True;True;True;True;True	533;10469;10471;15321;15322	1120;1121;1122;22941;22944;22945;22946;33795;33796;33797;33798
E9PLD3;A0A0B4J220;E9PRG8	E9PLD3;A0A0B4J220;E9PRG8	1;1;1	1;1;1	1;1;1	Uncharacterized protein C11orf98	C11orf98	>tr|E9PLD3|E9PLD3_HUMAN Uncharacterized protein OS=Homo sapiens PE=4 SV=1;>tr|A0A0B4J220|A0A0B4J220_HUMAN Chromosome 11 open reading frame 48, isoform CRA_c OS=Homo sapiens GN=C11orf98 PE=1 SV=1;>sp|E9PRG8|CK098_HUMAN Uncharacterized protein C11orf98 OS=Ho	3	1	1	1	13.1	13.1	13.1	11.6	99	99;123;122	0	2.7199	0.22832	0.92748	12.135	2	2	Median	1.0023	1.0169	6.9461	2	2	Median	4.3898	1.1058	1.2626	2	2	Median	21281000	9216800	1776900	10287000				159	14657	TRUE	15175	33515;33516
A0A0B4J230;Q9UII2	A0A0B4J230;Q9UII2	1;1	1;1	1;1	ATPase inhibitor, mitochondrial	ATPIF1	>tr|A0A0B4J230|A0A0B4J230_HUMAN ATPase inhibitor, mitochondrial OS=Homo sapiens GN=ATPIF1 PE=1 SV=1;>sp|Q9UII2|ATIF1_HUMAN ATPase inhibitor, mitochondrial OS=Homo sapiens GN=ATPIF1 PE=1 SV=1	2	1	1	1	13.3	13.3	13.3	8.119	75	75;106	0.0023386	1.2916	NaN	NaN	NaN	1	0	Median	NaN	NaN	NaN	1	0	Median	NaN	NaN	NaN	1	0	Median	3279700	1220800	509210	1549600				160	3218	TRUE	3312	7160
F8VV32;A0A0B4J259;P61626	F8VV32;A0A0B4J259;P61626	1;1;1	1;1;1	1;1;1	Lysozyme;Lysozyme C	LYZ	>tr|F8VV32|F8VV32_HUMAN Lysozyme OS=Homo sapiens GN=LYZ PE=1 SV=1;>tr|A0A0B4J259|A0A0B4J259_HUMAN Lysozyme OS=Homo sapiens GN=LYZ PE=1 SV=1;>sp|P61626|LYSC_HUMAN Lysozyme C OS=Homo sapiens GN=LYZ PE=1 SV=1	3	1	1	1	11.5	11.5	11.5	11.488	104	104;137;148	0	2.9613	NaN	NaN	NaN	0	0	Median	NaN	NaN	NaN	0	0	Median	NaN	NaN	NaN	0	0	Median	648570	648570	0	0				161	12064	TRUE	12479	27063
A0A0B4J269;Q13509;G3V2A3;G3V5W4;G3V2R8;G3V3R4;G3V2N6	A0A0B4J269;Q13509	17;17;6;2;2;2;2	2;2;1;1;1;1;1	2;2;1;1;1;1;1	Tubulin beta-3 chain	TUBB3	>tr|A0A0B4J269|A0A0B4J269_HUMAN Tubulin beta-3 chain OS=Homo sapiens GN=TUBB3 PE=1 SV=1;>sp|Q13509|TBB3_HUMAN Tubulin beta-3 chain OS=Homo sapiens GN=TUBB3 PE=1 SV=2	7	17	2	2	20.5	4.6	4.6	88.381	797	797;450;189;97;118;148;164	1	-2	0.33629	1.2898	15.057	2	1	Median	1.0324	1.0293	14.087	2	1	Median	3.6419	0.93516	23.579	2	1	Median	29210000	12852000	3709000	12648000	+			162	749;1097;3889;3890;4539;4540;6239;6442;6443;6523;7000;7430;7439;10058;10201;10893;15238	False;False;False;False;False;False;False;False;False;True;False;True;False;False;False;False;False	778;779;1136;3994;3995;4661;4662;6406;6407;6618;6619;6620;6708;7197;7644;7653;7654;10418;10419;10420;10568;11277;15770	1703;1704;1705;1706;1707;1708;1709;1710;1711;1712;1713;2544;2545;2546;2547;2548;8613;8614;8615;8616;8617;8618;8619;8620;8621;8622;8623;8624;8625;8626;9984;9985;9986;9987;9988;9989;9990;9991;9992;9993;9994;9995;9996;9997;9998;9999;10000;10001;10002;10003;10004;10005;10006;10007;10008;10009;10010;13979;13980;13981;13982;13983;13984;13985;13986;14421;14422;14423;14424;14425;14426;14427;14428;14429;1…
A0A0B4J2A4;P42765;K7EME0;K7ER88;K7EJB1;K7EJ68	A0A0B4J2A4;P42765;K7EME0	8;8;5;1;1;1	8;8;5;1;1;1	8;8;5;1;1;1	3-ketoacyl-CoA thiolase, mitochondrial	ACAA2	>tr|A0A0B4J2A4|A0A0B4J2A4_HUMAN 3-ketoacyl-CoA thiolase, mitochondrial OS=Homo sapiens GN=ACAA2 PE=1 SV=1;>sp|P42765|THIM_HUMAN 3-ketoacyl-CoA thiolase, mitochondrial OS=Homo sapiens GN=ACAA2 PE=1 SV=2;>tr|K7EME0|K7EME0_HUMAN 3-ketoacyl-CoA thiolase, mitoc	6	8	8	8	28.2	28.2	28.2	41.601	394	394;397;342;72;84;124	0	20.133	0.26432	0.92886	13.45	6	0	Median	1.1581	1.1512	7.418	6	0	Median	4.5993	1.2524	10.876	6	0	Median	191280000	77166000	22341000	91776000				163	138;2116;3339;6505;6530;11555;12929;14480	True;True;True;True;True;True;True;True	142;2183;3434;6690;6715;11963;13383;14991	250;4897;7446;14617;14676;25916;29089;32973
A0A0B4J2A5;Q5XKP0	A0A0B4J2A5;Q5XKP0	1;1	1;1	1;1	Protein QIL1	C19orf70;QIL1	>tr|A0A0B4J2A5|A0A0B4J2A5_HUMAN Protein QIL1 OS=Homo sapiens GN=C19orf70 PE=1 SV=1;>sp|Q5XKP0|QIL1_HUMAN Protein QIL1 OS=Homo sapiens GN=QIL1 PE=1 SV=1	2	1	1	1	7.9	7.9	7.9	15.436	140	140;118	0	2.3742	NaN	NaN	NaN	1	0	Median	NaN	NaN	NaN	1	0	Median	NaN	NaN	NaN	1	0	Median	3179400	1295000	439810	1444600				164	3473	TRUE	3570	7724
Q5W0H4;A0A0B4J2C3;P13693;J3KPG2;E9PJF7;Q56UQ5;H0YCX0;Q9HAU6	Q5W0H4;A0A0B4J2C3;P13693;J3KPG2;E9PJF7	6;6;6;5;5;2;1;1	6;6;6;5;5;2;1;1	6;6;6;5;5;2;1;1	Translationally-controlled tumor protein	TPT1	>tr|Q5W0H4|Q5W0H4_HUMAN Translationally-controlled tumor protein OS=Homo sapiens GN=TPT1 PE=1 SV=1;>tr|A0A0B4J2C3|A0A0B4J2C3_HUMAN Translationally-controlled tumor protein OS=Homo sapiens GN=TPT1 PE=1 SV=1;>sp|P13693|TCTP_HUMAN Translationally-controlled t	8	6	6	6	29.8	29.8	29.8	21.525	188	188;197;172;160;162;140;77;139	0	31.72	0.23441	0.9196	15.091	9	0	Median	0.94291	0.96053	3.6174	9	0	Median	4.0132	1.0147	14.368	9	0	Median	295380000	135430000	34420000	125540000				165	2336;2912;5338;6407;13944;15129	True;True;True;True;True;True	2405;3002;5475;6583;14432;15660	5312;5313;6574;11768;14349;14350;31642;31643;34546
A0A0B4J2D4;Q5VT79;P13928;B4DTF2;A0A087WTN9;A0A075B752;Q5T2P8;A0A087WUP0;A0A0B4J2F9;A0A075B765;A0A096LPL1	A0A0B4J2D4;Q5VT79;P13928;B4DTF2;A0A087WTN9;A0A075B752;Q5T2P8;A0A087WUP0;A0A0B4J2F9;A0A075B765	6;6;6;5;5;5;5;4;3;3;2	6;6;6;5;5;5;5;4;3;3;2	6;6;6;5;5;5;5;4;3;3;2	Annexin;Annexin A8-like protein 2;Annexin A8;Annexin A8-like protein 1	ANXA8L1;ANXA8L2;ANXA8	>tr|A0A0B4J2D4|A0A0B4J2D4_HUMAN Annexin OS=Homo sapiens GN=ANXA8L1 PE=1 SV=1;>sp|Q5VT79|AXA82_HUMAN Annexin A8-like protein 2 OS=Homo sapiens GN=ANXA8L2 PE=2 SV=1;>sp|P13928|ANXA8_HUMAN Annexin A8 OS=Homo sapiens GN=ANXA8 PE=1 SV=3;>tr|B4DTF2|B4DTF2_HUMAN	11	6	6	6	20.8	20.8	20.8	36.879	327	327;327;327;270;365;365;327;265;276;276;86	0	14.041	0.21151	0.83513	5.1391	5	0	Median	1.5752	1.5371	8.661	5	0	Median	7.2999	1.8583	10.937	5	0	Median	150450000	52922000	14839000	82690000				166	2898;3751;4568;7991;12029;13623	True;True;True;True;True;True	2987;3850;4691;8220;12443;14092	6533;8291;10065;18170;26999;30700
A0A0B4J2E5;Q15269	A0A0B4J2E5;Q15269	2;2	1;1	1;1	Periodic tryptophan protein 2 homolog	PWP2	>tr|A0A0B4J2E5|A0A0B4J2E5_HUMAN Uncharacterized protein OS=Homo sapiens PE=1 SV=1;>sp|Q15269|PWP2_HUMAN Periodic tryptophan protein 2 homolog OS=Homo sapiens GN=PWP2 PE=1 SV=2	2	2	1	1	3.2	1.7	1.7	102.45	919	919;919	0	3.2683	NaN	NaN	NaN	1	1	Median	NaN	NaN	NaN	1	1	Median	NaN	NaN	NaN	1	1	Median	3700700	1644200	434960	1621600				167	644;14037	False;True	669;14529	1455;31932
A0A0B4J2G9;P68036	A0A0B4J2G9;P68036	4;4	4;4	4;4	Ubiquitin-conjugating enzyme E2 L3	hCG_1789329;UBE2L3	>tr|A0A0B4J2G9|A0A0B4J2G9_HUMAN HCG1789329, isoform CRA_a OS=Homo sapiens GN=hCG_1789329 PE=3 SV=1;>sp|P68036|UB2L3_HUMAN Ubiquitin-conjugating enzyme E2 L3 OS=Homo sapiens GN=UBE2L3 PE=1 SV=1	2	4	4	4	34.4	34.4	34.4	17.807	154	154;154	0	8.3584	0.23328	0.98355	20.992	5	0	Median	0.9928	1.0249	4.6823	5	0	Median	4.1302	1.009	15.437	5	0	Median	75961000	34015000	9339800	32606000				168	301;4955;5729;6724	True;True;True;True	310;5087;5876;6913	582;10982;12778;12779;12780;12781;15055;15056
A0A0C4DFN1;Q8IWA4	A0A0C4DFN1;Q8IWA4	1;1	1;1	1;1	Mitofusin-1	MFN1	>tr|A0A0C4DFN1|A0A0C4DFN1_HUMAN Mitofusin-1 OS=Homo sapiens GN=MFN1 PE=1 SV=1;>sp|Q8IWA4|MFN1_HUMAN Mitofusin-1 OS=Homo sapiens GN=MFN1 PE=1 SV=2	2	1	1	1	1.9	1.9	1.9	84.159	741	741;741	0	5.1413	NaN	NaN	NaN	1	1	Median	NaN	NaN	NaN	1	1	Median	NaN	NaN	NaN	1	1	Median	1922900	785710	263540	873620				169	14086	TRUE	14579	32038
C9IYP1;H7C166;B4E2H8;E7EQD7;A0A0C4DFT3;Q12959	C9IYP1;H7C166;B4E2H8;E7EQD7;A0A0C4DFT3;Q12959	1;1;1;1;1;1	1;1;1;1;1;1	1;1;1;1;1;1	Disks large homolog 1	DLG1	>tr|C9IYP1|C9IYP1_HUMAN Disks large homolog 1 (Fragment) OS=Homo sapiens GN=DLG1 PE=1 SV=1;>tr|H7C166|H7C166_HUMAN Disks large homolog 1 (Fragment) OS=Homo sapiens GN=DLG1 PE=1 SV=1;>tr|B4E2H8|B4E2H8_HUMAN Disks large homolog 1 OS=Homo sapiens GN=DLG1 PE=1	6	1	1	1	9.8	9.8	9.8	13.282	122	122;286;370;658;892;904	0	2.5512	NaN	NaN	NaN	1	1	Median	NaN	NaN	NaN	1	1	Median	NaN	NaN	NaN	1	1	Median	2429900	989000	287290	1153600				170	6014	TRUE	6167	13460
A0A0C4DFU2;P04179;A0A0C4DFU1;F5H3C5;A0A0C4DG56;F5H4R2;F5GYZ5;G8JLJ2	A0A0C4DFU2;P04179;A0A0C4DFU1;F5H3C5;A0A0C4DG56;F5H4R2;F5GYZ5	5;5;4;3;3;3;3;2	5;5;4;3;3;3;3;2	5;5;4;3;3;3;3;2	Superoxide dismutase;Superoxide dismutase [Mn], mitochondrial	SOD2	>tr|A0A0C4DFU2|A0A0C4DFU2_HUMAN Superoxide dismutase OS=Homo sapiens GN=SOD2 PE=1 SV=1;>sp|P04179|SODM_HUMAN Superoxide dismutase [Mn], mitochondrial OS=Homo sapiens GN=SOD2 PE=1 SV=2;>tr|A0A0C4DFU1|A0A0C4DFU1_HUMAN Superoxide dismutase OS=Homo sapiens GN=	8	5	5	5	25.2	25.2	25.2	24.75	222	222;222;183;111;162;183;190;61	0	38.332	0.21379	0.81758	56.343	5	0	Median	0.7777	0.80959	6.0179	5	0	Median	3.492	0.8484	50.489	5	0	Median	239020000	118130000	29810000	91083000				171	803;2089;4313;4339;10302	True;True;True;True;True	834;2155;4427;4454;10673	1852;4832;9472;9534;23305
A0A0C4DFX0;Q9H6R4	A0A0C4DFX0;Q9H6R4	1;1	1;1	1;1	Nucleolar protein 6	NOL6	>tr|A0A0C4DFX0|A0A0C4DFX0_HUMAN Nucleolar protein 6 OS=Homo sapiens GN=NOL6 PE=1 SV=1;>sp|Q9H6R4|NOL6_HUMAN Nucleolar protein 6 OS=Homo sapiens GN=NOL6 PE=1 SV=2	2	1	1	1	7.5	7.5	7.5	22.203	200	200;1146	0	2.8804	NaN	NaN	NaN	1	0	Median	NaN	NaN	NaN	1	0	Median	NaN	NaN	NaN	1	0	Median	2911500	1123300	438050	1350100				172	13175	TRUE	13632	29592
C9J9K3;A0A0C4DG17;P08865;A6NE09;C9JQR9	C9J9K3;A0A0C4DG17;P08865;A6NE09	9;9;9;7;2	9;9;9;7;2	9;9;9;7;2	40S ribosomal protein SA	RPSA;RPSAP58	>tr|C9J9K3|C9J9K3_HUMAN 40S ribosomal protein SA (Fragment) OS=Homo sapiens GN=RPSA PE=1 SV=5;>tr|A0A0C4DG17|A0A0C4DG17_HUMAN 40S ribosomal protein SA OS=Homo sapiens GN=RPSA PE=1 SV=1;>sp|P08865|RSSA_HUMAN 40S ribosomal protein SA OS=Homo sapiens GN=RPSA	5	9	9	9	46.2	46.2	46.2	29.505	264	264;300;295;295;73	0	106.38	0.26368	1.0787	15.613	21	0	Median	0.99025	0.94974	6.6578	21	0	Median	3.7609	0.95574	11.513	21	0	Median	2718700000	1179000000	340090000	1199600000				173	287;794;3481;4033;4034;7148;8394;11303;15417	True;True;True;True;True;True;True;True;True	293;825;3578;4143;4144;7347;8627;11704;11705;15961	553;554;1835;1836;1837;1838;1839;1840;7733;7734;7735;7736;8911;8912;8913;15938;15939;19198;19199;19200;19201;25339;25340;25341;25342;25343;25344;25345;25346;25347;25348;35199;35200;35201
A0A0C4DG89;Q7L014;D6RJA6;H0Y9U3	A0A0C4DG89;Q7L014	11;11;5;1	11;11;5;1	11;11;5;1	Probable ATP-dependent RNA helicase DDX46	DDX46	>tr|A0A0C4DG89|A0A0C4DG89_HUMAN Probable ATP-dependent RNA helicase DDX46 OS=Homo sapiens GN=DDX46 PE=1 SV=1;>sp|Q7L014|DDX46_HUMAN Probable ATP-dependent RNA helicase DDX46 OS=Homo sapiens GN=DDX46 PE=1 SV=2	4	11	11	11	12.6	12.6	12.6	117.46	1032	1032;1031;471;70	0	23.704	0.17036	0.68717	1.2884	3	0	Median	1.1759	1.0837	5.4087	3	0	Median	6.7859	1.5232	13.088	3	0	Median	119290000	53734000	11178000	54374000				174	3016;4161;4503;6191;8379;8697;9833;11573;12223;12617;12618	True;True;True;True;True;True;True;True;True;True;True	3107;4273;4624;6351;8612;8944;10185;11981;12643;13053;13054;13055	6794;9133;9134;9915;9916;13885;19163;19164;19847;19848;22346;22347;25970;25971;27420;28321;28322;28323;28324
A0A0C4DG98;Q8NI27	A0A0C4DG98;Q8NI27	2;2	2;2	2;2	THO complex subunit 2	THOC2	>tr|A0A0C4DG98|A0A0C4DG98_HUMAN THO complex subunit 2 OS=Homo sapiens GN=THOC2 PE=1 SV=1;>sp|Q8NI27|THOC2_HUMAN THO complex subunit 2 OS=Homo sapiens GN=THOC2 PE=1 SV=2	2	2	2	2	1.2	1.2	1.2	169.58	1478	1478;1593	0	2.4191	0.31182	1.1503	28.408	4	4	Median	1.0889	1.0711	9.1765	4	4	Median	3.6011	0.95279	22.405	4	4	Median	6360500	2675400	870560	2814500				175	7800;11266	True;True	8023;11666	17709;17710;25280;25281
A0A0C4DGB6;CON__P02768-1;P02768;H0YA55;C9JKR2;D6RHD5;B7WNR0;A0A087WWT3;H7C013	A0A0C4DGB6;CON__P02768-1;P02768;H0YA55;C9JKR2;D6RHD5;B7WNR0;A0A087WWT3	8;8;8;7;5;5;5;4;3	2;2;2;1;1;1;1;1;1	2;2;2;1;1;1;1;1;1	Serum albumin	ALB	>tr|A0A0C4DGB6|A0A0C4DGB6_HUMAN Serum albumin OS=Homo sapiens GN=ALB PE=1 SV=1;>P02768-1 SWISS-PROT:P02768-1 Tax_Id=9606 Gene_Symbol=ALB Isoform 1 of Serum albumin precursor;>sp|P02768|ALBU_HUMAN Serum albumin OS=Homo sapiens GN=ALB PE=1 SV=2;>tr|H0YA55|H0	9	8	2	2	10.4	4	4	69.226	604	604;609;609;454;417;459;494;396;197	0	8.3009	0.057054	0.20726	83.515	5	5	Median	0.017595	0.019601	135.36	4	4	Median	0.44161	0.14271	148.02	4	4	Median	287460000	270320000	7495800	9641100			+	176	1896;3356;7217;8019;9210;14322;15246;15247	False;True;False;True;False;False;False;False	1954;3451;7419;8248;9472;14829;15778;15779	4395;4396;4397;4398;4399;4400;4401;4402;4403;4404;4405;4406;4407;4408;4409;4410;4411;4412;4413;4414;4415;4416;4417;4418;4419;4420;4421;4422;7479;16096;16097;16098;16099;16100;16101;16102;16103;16104;16105;16106;16107;16108;16109;16110;16111;16112;16113;16114;16115;16116;16117;16118;16119;16120;16121;16122;16123;16124;16125;16126;16127;16128;16129;16130;16131;16132;16133;16134;16135;16136;16137;16…
F5GWX5;A0A0C4DGG9;Q14839;Q8TDI0;Q12873;I3L229;H7C3H7;F5H6N4;H7C0J3;K7EMY3	F5GWX5;A0A0C4DGG9;Q14839	10;10;10;3;2;1;1;1;1;1	10;10;10;3;2;1;1;1;1;1	10;10;10;3;2;1;1;1;1;1	Chromodomain-helicase-DNA-binding protein 4	CHD4	>tr|F5GWX5|F5GWX5_HUMAN Chromodomain-helicase-DNA-binding protein 4 OS=Homo sapiens GN=CHD4 PE=1 SV=1;>tr|A0A0C4DGG9|A0A0C4DGG9_HUMAN Chromodomain-helicase-DNA-binding protein 4 OS=Homo sapiens GN=CHD4 PE=1 SV=1;>sp|Q14839|CHD4_HUMAN Chromodomain-helicase-	10	10	10	10	6.2	6.2	6.2	217.1	1905	1905;1937;1912;1954;2000;250;277;354;383;1060	0	15.204	0.23664	0.89364	18.098	8	0	Median	1.0967	1.1269	5.6044	8	0	Median	4.2314	1.2717	27.036	8	0	Median	85287000	35877000	11022000	38387000				177	513;4465;4837;4879;8183;8507;9806;13225;13722;14868	True;True;True;True;True;True;True;True;True;True	532;4583;4965;5008;8413;8750;10157;13685;14196;15394	1119;9837;9838;9839;10706;10807;10808;18689;19456;22301;29727;30946;30947;33957
A0A0C4DGH2;P62070;E9PK85;E9PQ87	A0A0C4DGH2;P62070;E9PK85	4;4;3;1	2;2;2;1	2;2;2;1	Ras-related protein R-Ras2	RRAS2	>tr|A0A0C4DGH2|A0A0C4DGH2_HUMAN Ras-related protein R-Ras2 OS=Homo sapiens GN=RRAS2 PE=1 SV=1;>sp|P62070|RRAS2_HUMAN Ras-related protein R-Ras2 OS=Homo sapiens GN=RRAS2 PE=1 SV=1;>tr|E9PK85|E9PK85_HUMAN Ras-related protein R-Ras2 (Fragment) OS=Homo sapiens	4	4	2	2	23.2	9.9	9.9	23.294	203	203;204;166;69	0	12.8	0.20292	0.82879	4.6546	2	0	Median	1.205	1.2362	0.91034	2	0	Median	5.542	1.4119	10.042	2	0	Median	11913000	4986400	1042900	5883800				178	4985;7514;9227;10760	True;False;False;True	5117;7733;9490;11143	11030;16967;21068;24196
A0A0C4DGI3;B4DJV2;O75390;H0YIC4;F8W642;F8VZK9;F8VX07;F8VRP1;F8VX68;F8VPF9;F8VPA1;F8VTT8;F8W1S4;F8W4S1;H0YH82;F8VWQ5;F8VRI6	A0A0C4DGI3;B4DJV2;O75390;H0YIC4	8;8;8;4;3;3;3;3;3;3;3;3;3;3;3;1;1	8;8;8;4;3;3;3;3;3;3;3;3;3;3;3;1;1	8;8;8;4;3;3;3;3;3;3;3;3;3;3;3;1;1	Citrate synthase;Citrate synthase, mitochondrial	CS	>tr|A0A0C4DGI3|A0A0C4DGI3_HUMAN Citrate synthase OS=Homo sapiens GN=CS PE=1 SV=1;>tr|B4DJV2|B4DJV2_HUMAN Citrate synthase OS=Homo sapiens GN=CS PE=1 SV=1;>sp|O75390|CISY_HUMAN Citrate synthase, mitochondrial OS=Homo sapiens GN=CS PE=1 SV=2;>tr|H0YIC4|H0YIC	17	8	8	8	19.5	19.5	19.5	44.703	400	400;453;466;123;66;81;114;118;120;141;144;149;157;178;190;132;140	0	25.496	0.27941	1.0772	22.717	11	0	Median	1.0581	1.106	7.8706	11	0	Median	3.6565	0.98119	19.32	11	0	Median	672540000	265220000	85408000	321910000				179	949;956;4428;4801;4802;6668;9057;14711	True;True;True;True;True;True;True;True	982;989;4546;4928;4929;6856;9314;15231	2196;2197;2198;2211;9751;10644;10645;10646;14948;14949;14950;20662;33640
A0A0C4DGK1;G3XAH6;Q9NRJ5;P51003;G3V3I9;H0YJ00;G3V457;H7C3W0;F8WAT4;Q9BWT3	A0A0C4DGK1;G3XAH6;Q9NRJ5;P51003;G3V3I9;H0YJ00	3;3;3;3;2;2;1;1;1;1	3;3;3;3;2;2;1;1;1;1	3;3;3;3;2;2;1;1;1;1	Poly(A) polymerase beta;Poly(A) polymerase alpha	PAPOLA;PAPOLB	>tr|A0A0C4DGK1|A0A0C4DGK1_HUMAN Poly(A) polymerase alpha OS=Homo sapiens GN=PAPOLA PE=1 SV=1;>tr|G3XAH6|G3XAH6_HUMAN Poly(A) polymerase alpha OS=Homo sapiens GN=PAPOLA PE=1 SV=1;>sp|Q9NRJ5|PAPOB_HUMAN Poly(A) polymerase beta OS=Homo sapiens GN=PAPOLB PE=2	10	3	3	3	16	16	16	27.056	238	238;724;636;745;177;203;111;168;234;736	0.00050378	1.9702	0.17647	0.73491	51.726	4	4	Median	1.169	1.1173	6.9559	4	4	Median	6.6242	1.6557	51.175	4	4	Median	18696000	8228400	1326200	9140900				180	1689;5796;7363	True;True;True	1745;5945;7573	3947;3948;12915;16498
K7ELJ7;A0A0C4DGQ5;P04632;K7EIV0;A0A075B7C0;U3KQE2;K7EKD8;K7EM73;U3KPR7;K7EMQ1;Q96L46;K7ES78	K7ELJ7;A0A0C4DGQ5;P04632;K7EIV0;A0A075B7C0;U3KQE2;K7EKD8;K7EM73	9;9;9;7;7;6;6;5;4;2;2;1	9;9;9;7;7;6;6;5;4;2;2;1	9;9;9;7;7;6;6;5;4;2;2;1	Calpain small subunit 1	CAPNS1	>tr|K7ELJ7|K7ELJ7_HUMAN Calpain small subunit 1 OS=Homo sapiens GN=CAPNS1 PE=1 SV=1;>tr|A0A0C4DGQ5|A0A0C4DGQ5_HUMAN Calpain small subunit 1 OS=Homo sapiens GN=CAPNS1 PE=1 SV=1;>sp|P04632|CPNS1_HUMAN Calpain small subunit 1 OS=Homo sapiens GN=CAPNS1 PE=1 SV	12	9	9	9	41.4	41.4	41.4	29.44	278	278;322;268;196;197;161;238;163;100;94;248;72	0	92.287	0.2564	1.0734	15.422	12	0	Median	0.999	1.0074	5.9403	12	0	Median	3.9518	0.95729	14.898	12	0	Median	297440000	131700000	37122000	128620000				181	6131;7627;7755;9442;12393;12613;15244;15245;15348	True;True;True;True;True;True;True;True;True	6288;7849;7978;9738;9739;12819;13049;15776;15777;15891	13742;13743;17208;17605;21527;21528;21529;21530;27793;28309;28310;34768;34769;34770;35072
A0A0C4DGS0;P56556;R4GN43	A0A0C4DGS0;P56556;R4GN43	3;3;2	3;3;2	3;3;2	NADH dehydrogenase [ubiquinone] 1 alpha subcomplex subunit 6	NDUFA6	>tr|A0A0C4DGS0|A0A0C4DGS0_HUMAN NADH dehydrogenase [ubiquinone] 1 alpha subcomplex subunit 6 OS=Homo sapiens GN=NDUFA6 PE=1 SV=1;>sp|P56556|NDUA6_HUMAN NADH dehydrogenase [ubiquinone] 1 alpha subcomplex subunit 6 OS=Homo sapiens GN=NDUFA6 PE=1 SV=3;>tr|R4G	3	3	3	3	27.3	27.3	27.3	15.136	128	128;154;71	0	5.3906	0.23028	0.96687	5.6823	3	0	Median	1.238	1.2869	17.853	3	0	Median	4.935	1.2017	18	3	0	Median	45166000	17968000	4508100	22689000				182	3418;3616;14631	True;True;True	3515;3713;15146	7594;8019;33429
A0A0C4DGS1;P39656;U3KQ84	A0A0C4DGS1;P39656;U3KQ84	10;10;5	10;10;5	10;10;5	Dolichyl-diphosphooligosaccharide--protein glycosyltransferase 48 kDa subunit	DDOST	>tr|A0A0C4DGS1|A0A0C4DGS1_HUMAN Dolichyl-diphosphooligosaccharide--protein glycosyltransferase 48 kDa subunit OS=Homo sapiens GN=DDOST PE=1 SV=1;>sp|P39656|OST48_HUMAN Dolichyl-diphosphooligosaccharide--protein glycosyltransferase 48 kDa subunit OS=Homo sa	3	10	10	10	24.6	24.6	24.6	48.799	439	439;456;155	0	39.918	0.27254	0.96538	17.243	11	0	Median	0.94943	0.9411	11.266	11	0	Median	3.5354	0.98598	12.747	11	0	Median	712730000	319410000	88312000	305010000				183	3328;4373;8517;10227;12009;12289;12845;14895;14900;15380	True;True;True;True;True;True;True;True;True;True	3423;4488;8760;10596;12423;12712;13293;15422;15427;15924	7428;9606;19474;23170;23171;26967;26968;26969;27572;27573;28860;34000;34001;34011;34012;35128
Q5VY30;A0A0C4DGV7;P02753	Q5VY30;A0A0C4DGV7;P02753	1;1;1	1;1;1	1;1;1	Retinol-binding protein 4;Plasma retinol-binding protein(1-182);Plasma retinol-binding protein(1-181);Plasma retinol-binding protein(1-179);Plasma retinol-binding protein(1-176)	RBP4	>tr|Q5VY30|Q5VY30_HUMAN Retinol binding protein 4, plasma, isoform CRA_b OS=Homo sapiens GN=RBP4 PE=1 SV=2;>tr|A0A0C4DGV7|A0A0C4DGV7_HUMAN Retinol-binding protein 4 OS=Homo sapiens GN=RBP4 PE=1 SV=1;>sp|P02753|RET4_HUMAN Retinol-binding protein 4 OS=Homo s	3	1	1	1	5	5	5	22.974	199	199;199;201	0	2.3738	NaN	NaN	NaN	1	1	Median	NaN	NaN	NaN	1	1	Median	NaN	NaN	NaN	1	1	Median	8603400	7479600	267490	856380				184	15443	TRUE	15987	35260
A0A0C4DGX4;Q13616	A0A0C4DGX4;Q13616	2;2	2;2	2;2	Cullin-1	CUL1	>tr|A0A0C4DGX4|A0A0C4DGX4_HUMAN Cullin-1 OS=Homo sapiens GN=CUL1 PE=1 SV=1;>sp|Q13616|CUL1_HUMAN Cullin-1 OS=Homo sapiens GN=CUL1 PE=1 SV=2	2	2	2	2	3.3	3.3	3.3	87.387	752	752;776	0.00099453	1.8513	0.24094	0.98039	1.0165	2	2	Median	0.66413	0.6477	11.93	2	2	Median	2.7564	0.68441	12.947	2	2	Median	9840400	5047400	1343200	3449800				185	3740;8189	True;True	3839;8419	8277;18703
X6RC15;H7C2K6;A0A0D9SG07;A0A0C4DH22;Q9H4G0	X6RC15;H7C2K6;A0A0D9SG07;A0A0C4DH22;Q9H4G0	1;1;1;1;1	1;1;1;1;1	1;1;1;1;1	Band 4.1-like protein 1	EPB41L1	>tr|X6RC15|X6RC15_HUMAN Band 4.1-like protein 1 (Fragment) OS=Homo sapiens GN=EPB41L1 PE=1 SV=1;>tr|H7C2K6|H7C2K6_HUMAN Band 4.1-like protein 1 (Fragment) OS=Homo sapiens GN=EPB41L1 PE=1 SV=1;>tr|A0A0D9SG07|A0A0D9SG07_HUMAN Band 4.1-like protein 1 OS=Homo	5	1	1	1	5.1	5.1	5.1	21.299	197	197;268;670;880;881	0.003643	1.1432	NaN	NaN	NaN	1	1	Median	NaN	NaN	NaN	1	1	Median	NaN	NaN	NaN	1	1	Median	2797100	919700	239850	1637500				186	5418	TRUE	5557	12035
H0YNI7;F5H7D6;H0YNT2;K7EMK7;Q5T7A9;A0A0D9SES8;H0YKT5;H0YKN8;H0YL70;Q04725;Q04724;Q04726;Q04727	H0YNI7;F5H7D6;H0YNT2;K7EMK7;Q5T7A9;A0A0D9SES8;H0YKT5;H0YKN8;H0YL70;Q04725;Q04724;Q04726;Q04727	1;1;1;1;1;1;1;1;1;1;1;1;1	1;1;1;1;1;1;1;1;1;1;1;1;1	1;1;1;1;1;1;1;1;1;1;1;1;1	Transducin-like enhancer protein 2;Transducin-like enhancer protein 1;Transducin-like enhancer protein 3;Transducin-like enhancer protein 4	TLE3;TLE2;TLE1;TLE4	>tr|H0YNI7|H0YNI7_HUMAN Transducin-like enhancer protein 3 OS=Homo sapiens GN=TLE3 PE=1 SV=1;>tr|F5H7D6|F5H7D6_HUMAN Transducin-like enhancer protein 3 OS=Homo sapiens GN=TLE3 PE=1 SV=1;>tr|H0YNT2|H0YNT2_HUMAN Transducin-like enhancer protein 3 OS=Homo sap	13	1	1	1	3.1	3.1	3.1	38.368	353	353;699;716;744;769;772;774;778;782;743;770;772;773	0.0036413	1.1373	0.44556	1.9327	12.513	2	2	Median	1.2401	1.1898	6.8853	2	2	Median	2.7833	0.66864	5.6275	2	2	Median	5913200	2352900	975090	2585200				187	12978	TRUE	13432	29197;29198
A0A0D9SFB3;A0A0D9SG12;A0A0D9SF53;O00571;O15523;A0A087WVZ1;C9J8G5;C9J081	A0A0D9SFB3;A0A0D9SG12;A0A0D9SF53;O00571;O15523	12;12;12;12;7;2;1;1	12;12;12;12;7;2;1;1	12;12;12;12;7;2;1;1	ATP-dependent RNA helicase DDX3X;ATP-dependent RNA helicase DDX3Y	DDX3X;DDX3Y	>tr|A0A0D9SFB3|A0A0D9SFB3_HUMAN ATP-dependent RNA helicase DDX3X OS=Homo sapiens GN=DDX3X PE=1 SV=1;>tr|A0A0D9SG12|A0A0D9SG12_HUMAN ATP-dependent RNA helicase DDX3X OS=Homo sapiens GN=DDX3X PE=1 SV=1;>tr|A0A0D9SF53|A0A0D9SF53_HUMAN ATP-dependent RNA helica	8	12	12	12	22.7	22.7	22.7	70.839	640	640;647;733;662;660;138;224;250	0	71.719	0.24283	0.97742	14.852	12	0	Median	1.0679	1.0423	6.0901	12	0	Median	4.2821	1.0949	12.496	12	0	Median	397130000	173040000	44632000	179460000				188	2346;2481;4251;4675;5262;5481;10785;11283;11831;12281;13752;14749	True;True;True;True;True;True;True;True;True;True;True;True	2415;2559;4365;4801;5399;5624;11168;11683;12244;12704;14226;15271	5338;5619;9355;10331;11637;12287;24228;25305;26610;27559;27560;31042;33718
A0A0D9SG53;A0A0D9SGB2;Q5JXI0;A0A0D9SFI6;A0A0D9SFB0;Q5JXH9;A0A0D9SFZ9;Q5JXH8;Q5JXH7;Q5JXI3;Q5JXI2;Q5JXI8;Q13642;A0A0D9SGD1	A0A0D9SG53;A0A0D9SGB2;Q5JXI0;A0A0D9SFI6;A0A0D9SFB0;Q5JXH9;A0A0D9SFZ9;Q5JXH8;Q5JXH7;Q5JXI3;Q5JXI2;Q5JXI8;Q13642;A0A0D9SGD1	2;2;2;2;2;2;2;2;2;2;2;2;2;1	2;2;2;2;2;2;2;2;2;2;2;2;2;1	2;2;2;2;2;2;2;2;2;2;2;2;2;1	Four and a half LIM domains protein 1	FHL1	>tr|A0A0D9SG53|A0A0D9SG53_HUMAN Four and a half LIM domains protein 1 (Fragment) OS=Homo sapiens GN=FHL1 PE=1 SV=1;>tr|A0A0D9SGB2|A0A0D9SGB2_HUMAN Four and a half LIM domains protein 1 (Fragment) OS=Homo sapiens GN=FHL1 PE=1 SV=1;>tr|Q5JXI0|Q5JXI0_HUMAN Fo	14	2	2	2	15.4	15.4	15.4	15.015	130	130;138;141;147;152;155;175;204;205;207;210;257;323;78	0	4.4552	0.31869	1.2599	17.233	2	1	Median	1.1972	1.2207	7.1464	2	1	Median	3.8286	0.99252	10.289	2	1	Median	27562000	11391000	3826400	12345000				189	793;4108	True;True	824;4218	1834;9020
A0A0D9SFE4;Q05193;A0A0D9SFB1	A0A0D9SFE4;Q05193;A0A0D9SFB1	10;10;8	5;5;3	4;4;2	Dynamin-1	DNM1	>tr|A0A0D9SFE4|A0A0D9SFE4_HUMAN Dynamin-1 OS=Homo sapiens GN=DNM1 PE=1 SV=1;>sp|Q05193|DYN1_HUMAN Dynamin-1 OS=Homo sapiens GN=DNM1 PE=1 SV=2;>tr|A0A0D9SFB1|A0A0D9SFB1_HUMAN Dynamin-1 OS=Homo sapiens GN=DNM1 PE=1 SV=1	3	10	5	4	12	7.2	5.4	97.237	864	864;864;835	0	9.7262	0.34942	1.3902	20.62	5	5	Median	2.2764	2.2438	13.236	5	5	Median	6.5565	1.6533	28.157	5	5	Median	19532000	6140600	2094500	11296000				190	1009;2959;3887;4599;5227;10040;12044;12547;12548;14790	True;False;False;False;False;True;False;True;True;True	1043;3049;3992;4722;5364;10398;12458;12981;12982;15313	2359;6677;8609;8610;10136;11545;22771;27024;27025;28134;28135;33785
H7BY36;A0A0D9SFL3;B0QYK0;C9JGE3;Q01844	H7BY36;A0A0D9SFL3;B0QYK0;C9JGE3;Q01844	2;2;2;2;2	2;2;2;2;2	2;2;2;2;2	RNA-binding protein EWS	EWSR1	>tr|H7BY36|H7BY36_HUMAN RNA-binding protein EWS (Fragment) OS=Homo sapiens GN=EWSR1 PE=1 SV=1;>tr|A0A0D9SFL3|A0A0D9SFL3_HUMAN RNA-binding protein EWS OS=Homo sapiens GN=EWSR1 PE=1 SV=1;>tr|B0QYK0|B0QYK0_HUMAN RNA-binding protein EWS OS=Homo sapiens GN=EWSR	5	2	2	2	9.4	9.4	9.4	32.071	308	308;584;618;620;656	0	15.423	0.36686	1.3012	26.198	3	0	Median	1.0485	1.0061	0.84759	3	0	Median	2.8477	0.76279	24.977	3	0	Median	93275000	40362000	11634000	41279000				191	205;4271	True;True	210;4385	382;383;384;9394;9395
Q5QPP1;A0A0E3D6K8;Q14376;Q5QPP3;Q5QPP4	Q5QPP1;A0A0E3D6K8;Q14376	3;3;3;1;1	3;3;3;1;1	3;3;3;1;1	UDP-glucose 4-epimerase	GALE	>tr|Q5QPP1|Q5QPP1_HUMAN UDP-glucose 4-epimerase (Fragment) OS=Homo sapiens GN=GALE PE=1 SV=1;>tr|A0A0E3D6K8|A0A0E3D6K8_HUMAN UDP-glucose 4-epimerase (Fragment) OS=Homo sapiens GN=GALE PE=1 SV=1;>sp|Q14376|GALE_HUMAN UDP-glucose 4-epimerase OS=Homo sapiens	5	3	3	3	21.6	21.6	21.6	21.432	194	194;195;348;227;239	0	10.71	0.1788	0.69348	69.887	3	3	Median	0.89362	0.90789	3.3774	3	3	Median	5.421	1.2571	58.476	3	3	Plateau	57249000	26787000	6753100	23709000				192	1713;4472;12152	True;True;True	1769;4591;12569	4030;9854;27278
F8WC54;A0AVL1;Q13443	F8WC54;A0AVL1;Q13443	1;1;1	1;1;1	1;1;1	Disintegrin and metalloproteinase domain-containing protein 9	ADAM9	>tr|F8WC54|F8WC54_HUMAN Disintegrin and metalloproteinase domain-containing protein 9 OS=Homo sapiens GN=ADAM9 PE=1 SV=1;>tr|A0AVL1|A0AVL1_HUMAN ADAM9 protein OS=Homo sapiens GN=ADAM9 PE=1 SV=1;>sp|Q13443|ADAM9_HUMAN Disintegrin and metalloproteinase domai	3	1	1	1	3.8	3.8	3.8	69.323	628	628;712;819	0.00098571	1.7635	NaN	NaN	NaN	1	0	Median	NaN	NaN	NaN	1	0	Median	NaN	NaN	NaN	1	0	Median	7970600	3035200	977100	3958300				193	8617	TRUE	8861	19702
A0AVT1;H0Y8S8	A0AVT1	7;1	7;1	7;1	Ubiquitin-like modifier-activating enzyme 6	UBA6	>sp|A0AVT1|UBA6_HUMAN Ubiquitin-like modifier-activating enzyme 6 OS=Homo sapiens GN=UBA6 PE=1 SV=1	2	7	7	7	7.9	7.9	7.9	117.97	1052	1052;271	0	12.418	0.18692	0.70246	24.597	3	0	Median	0.98587	0.92586	4.5161	3	0	Median	4.4463	1.1329	22.068	3	0	Median	54840000	24461000	6682000	23697000				194	1058;4110;6388;7613;9800;13173;14544	True;True;True;True;True;True;True	1095;4220;6562;7833;10150;13630;15055	2471;9022;14315;17185;22288;29590;33152
A2A274;Q99798	A2A274;Q99798	14;14	14;14	14;14	Aconitate hydratase, mitochondrial	ACO2	>tr|A2A274|A2A274_HUMAN Aconitate hydratase, mitochondrial OS=Homo sapiens GN=ACO2 PE=1 SV=1;>sp|Q99798|ACON_HUMAN Aconitate hydratase, mitochondrial OS=Homo sapiens GN=ACO2 PE=1 SV=2	2	14	14	14	23.9	23.9	23.9	87.819	805	805;780	0	93.453	0.28286	1.0925	15.9	12	0	Median	1.1275	1.1114	5.9957	12	0	Median	4.0155	1.0349	10.815	12	0	Median	251120000	103890000	32747000	114480000				195	807;2168;2217;2518;6697;8479;8969;9736;9762;10222;11900;13324;13365;14902	True;True;True;True;True;True;True;True;True;True;True;True;True;True	838;2236;2286;2597;6885;8721;9224;10085;10111;10591;12314;13787;13829;15429	1857;1858;1859;4997;5079;5080;5693;15007;15008;19401;19402;20458;22177;22178;22179;22213;22214;23165;26746;26747;29926;30017;30018;34016;34017
A2A283;F8WCE4;B5MCD7;O43759	A2A283;F8WCE4;B5MCD7;O43759	1;1;1;1	1;1;1;1	1;1;1;1	Synaptogyrin-1	SYNGR1	>tr|A2A283|A2A283_HUMAN Synaptogyrin-1 OS=Homo sapiens GN=SYNGR1 PE=1 SV=1;>tr|F8WCE4|F8WCE4_HUMAN Synaptogyrin-1 OS=Homo sapiens GN=SYNGR1 PE=1 SV=1;>tr|B5MCD7|B5MCD7_HUMAN Synaptogyrin-1 OS=Homo sapiens GN=SYNGR1 PE=1 SV=1;>sp|O43759|SNG1_HUMAN Synaptogy	4	1	1	1	10.2	10.2	10.2	12.79	118	118;144;169;233	0.00050787	2.0243	NaN	NaN	NaN	1	0	Median	NaN	NaN	NaN	1	0	Median	NaN	NaN	NaN	1	0	Median	5864900	2864300	741080	2259500				196	558	TRUE	577	1246
A2A2D0;P16949	A2A2D0;P16949	10;10	10;10	7;7	Stathmin	STMN1	>tr|A2A2D0|A2A2D0_HUMAN Stathmin (Fragment) OS=Homo sapiens GN=STMN1 PE=1 SV=5;>sp|P16949|STMN1_HUMAN Stathmin OS=Homo sapiens GN=STMN1 PE=1 SV=3	2	10	10	7	60.5	60.5	46.5	9.8642	86	86;149	0	30.269	0.25858	1.0454	16.231	11	0	Median	0.98457	1.0086	4.3527	11	0	Median	3.7248	0.93302	18.061	11	0	Median	745160000	317160000	114510000	313490000				197	1455;1501;1502;1503;2386;2387;3309;6990;10808;11515	True;True;True;True;True;True;True;True;True;True	1507;1553;1554;1555;2457;2458;3404;7187;11191;11923	3434;3435;3436;3437;3535;3536;3537;5412;5413;5414;7390;15574;24276;25840;25841;25842;25843
A2AB15;O60231	A2AB15;O60231	1;1	1;1	1;1	Putative pre-mRNA-splicing factor ATP-dependent RNA helicase DHX16	DHX16	>tr|A2AB15|A2AB15_HUMAN Putative pre-mRNA-splicing factor ATP-dependent RNA helicase DHX16 (Fragment) OS=Homo sapiens GN=DHX16 PE=1 SV=1;>sp|O60231|DHX16_HUMAN Putative pre-mRNA-splicing factor ATP-dependent RNA helicase DHX16 OS=Homo sapiens GN=DHX16 PE=1	2	1	1	1	4.4	4.4	4.4	34.88	295	295;1041	0.00099502	1.86	NaN	NaN	NaN	1	0	Median	NaN	NaN	NaN	1	0	Median	NaN	NaN	NaN	1	0	Median	4218200	1887800	546100	1784300				198	74	TRUE	76	118
A2IDA3;P29372	A2IDA3;P29372	1;1	1;1	1;1	DNA-3-methyladenine glycosylase	MPG	>tr|A2IDA3|A2IDA3_HUMAN DNA-3-methyladenine glycosylase (Fragment) OS=Homo sapiens GN=MPG PE=1 SV=1;>sp|P29372|3MG_HUMAN DNA-3-methyladenine glycosylase OS=Homo sapiens GN=MPG PE=1 SV=3	2	1	1	1	6	6	6	27.295	251	251;298	0.0027701	1.2173	NaN	NaN	NaN	1	1	Median	NaN	NaN	NaN	1	1	Median	NaN	NaN	NaN	1	1	Median	4428000	1607100	517250	2303600				199	7793	TRUE	8016	17700
A2IDC6;Q13084;A2IDC7;Q4TT37	A2IDC6;Q13084;A2IDC7;Q4TT37	2;2;1;1	2;2;1;1	2;2;1;1	39S ribosomal protein L28, mitochondrial	MRPL28	>tr|A2IDC6|A2IDC6_HUMAN 39S ribosomal protein L28, mitochondrial (Fragment) OS=Homo sapiens GN=MRPL28 PE=1 SV=1;>sp|Q13084|RM28_HUMAN 39S ribosomal protein L28, mitochondrial OS=Homo sapiens GN=MRPL28 PE=1 SV=4;>tr|A2IDC7|A2IDC7_HUMAN 39S ribosomal protein	4	2	2	2	12.1	12.1	12.1	28.506	240	240;256;194;218	0	6.1003	0.29749	1.156	32.985	2	1	Median	0.99308	1.0214	5.0757	2	1	Median	3.2728	0.85872	25.624	2	1	Median	20641000	9208300	2505400	8927600				200	8157;12749	True;True	8387;13190	18645;28633
A2VDF0;X6R6T9;X6RK00	A2VDF0;X6R6T9;X6RK00	2;1;1	2;1;1	2;1;1	Fucose mutarotase	FUOM	>sp|A2VDF0|FUCM_HUMAN Fucose mutarotase OS=Homo sapiens GN=FUOM PE=1 SV=2;>tr|X6R6T9|X6R6T9_HUMAN Fucose mutarotase OS=Homo sapiens GN=FUOM PE=1 SV=1;>tr|X6RK00|X6RK00_HUMAN Fucose mutarotase (Fragment) OS=Homo sapiens GN=FUOM PE=1 SV=2	3	2	2	2	20.1	20.1	20.1	16.765	154	154;109;127	0	7.088	0.12647	0.52517	24.602	2	1	Median	0.90724	0.92394	4.9191	2	1	Median	7.02	1.6894	16.591	2	1	Median	3994000	1843500	306210	1844300				201	278;5150	True;True	284;5285	541;11388
Q5TGE2;A5PLL7	Q5TGE2;A5PLL7	1;1	1;1	1;1	Transmembrane protein 189	TMEM189	>tr|Q5TGE2|Q5TGE2_HUMAN HCG2044780, isoform CRA_b OS=Homo sapiens GN=TMEM189 PE=1 SV=1;>sp|A5PLL7|TM189_HUMAN Transmembrane protein 189 OS=Homo sapiens GN=TMEM189 PE=1 SV=3	2	1	1	1	7.7	7.7	7.7	22.883	195	195;270	0	2.9154	NaN	NaN	NaN	1	0	Median	NaN	NaN	NaN	1	0	Median	NaN	NaN	NaN	1	0	Median	10363000	4212100	1903500	4247500				202	10914	TRUE	11299	24540
A5YKK6;H3BMZ2	A5YKK6;H3BMZ2	2;1	2;1	2;1	CCR4-NOT transcription complex subunit 1	CNOT1	>sp|A5YKK6|CNOT1_HUMAN CCR4-NOT transcription complex subunit 1 OS=Homo sapiens GN=CNOT1 PE=1 SV=2;>tr|H3BMZ2|H3BMZ2_HUMAN CCR4-NOT transcription complex subunit 1 (Fragment) OS=Homo sapiens GN=CNOT1 PE=1 SV=1	2	2	2	2	0.8	0.8	0.8	266.94	2376	2376;439	0	6.8605	0.27756	1.0287	13.335	5	3	Median	1.0149	1.0645	18.13	5	3	Median	4.7208	1.3501	19.516	5	3	Linear	10233000	4132500	1173100	4927000				203	11560;11634	True;True	11968;12042	25948;25949;25950;26152;26153
A6NDG6	A6NDG6	2	2	2	Phosphoglycolate phosphatase	PGP	>sp|A6NDG6|PGP_HUMAN Phosphoglycolate phosphatase OS=Homo sapiens GN=PGP PE=1 SV=1	1	2	2	2	6.2	6.2	6.2	34.006	321	321	0	4.337	0.20697	0.82904	9.6099	2	1	Median	1.1988	1.1682	12.481	2	1	Median	5.9267	1.4788	1.7481	2	1	Median	28697000	11257000	2691100	14749000				204	3719;7759	True;True	3818;7982	8239;17629
A6NEM2;P51610;H7C1C4;Q9Y5Z7	A6NEM2;P51610	4;4;1;1	4;4;1;1	4;4;1;1	Host cell factor 1;HCF N-terminal chain 1;HCF N-terminal chain 2;HCF N-terminal chain 3;HCF N-terminal chain 4;HCF N-terminal chain 5;HCF N-terminal chain 6;HCF C-terminal chain 1;HCF C-terminal chain 2;HCF C-terminal chain 3;HCF C-terminal chain 4;HCF C-terminal chain 5;HCF C-terminal chain 6	HCFC1	>tr|A6NEM2|A6NEM2_HUMAN Host cell factor 1 OS=Homo sapiens GN=HCFC1 PE=1 SV=2;>sp|P51610|HCFC1_HUMAN Host cell factor 1 OS=Homo sapiens GN=HCFC1 PE=1 SV=2	4	4	4	4	2.5	2.5	2.5	213.47	2080	2080;2035;611;792	0	6.3007	0.23533	0.8805	16.418	4	0	Median	1.0252	0.96586	15.897	4	0	Median	4.7572	1.2161	25.315	4	0	Median	54398000	22849000	6936500	24612000				205	1423;4210;5223;5590	True;True;True;True	1474;4322;5360;5735	3327;3328;3329;3330;9278;9279;9280;11535;12508
F8VVW8;F8VZG4;F8W1J0;A6NF51;O95861	F8VVW8;F8VZG4;F8W1J0;A6NF51;O95861	1;1;1;1;1	1;1;1;1;1	1;1;1;1;1	3(2),5-bisphosphate nucleotidase 1	BPNT1	>tr|F8VVW8|F8VVW8_HUMAN 3(2),5-bisphosphate nucleotidase 1 (Fragment) OS=Homo sapiens GN=BPNT1 PE=1 SV=2;>tr|F8VZG4|F8VZG4_HUMAN 3(2),5-bisphosphate nucleotidase 1 (Fragment) OS=Homo sapiens GN=BPNT1 PE=1 SV=1;>tr|F8W1J0|F8W1J0_HUMAN 3(2),5-bispho	5	1	1	1	8.5	8.5	8.5	14.405	130	130;136;170;291;308	0	3.0377	NaN	NaN	NaN	1	1	Median	NaN	NaN	NaN	1	1	Median	NaN	NaN	NaN	1	1	Median	15126000	5611400	1903900	7611000				206	9060	TRUE	9317	20667
A6NFX8;Q9UKK9;A6NJU6;A6NCQ0;H0YEY4;C9JYY9	A6NFX8;Q9UKK9;A6NJU6;A6NCQ0	9;9;6;5;3;2	9;9;6;5;3;2	9;9;6;5;3;2	ADP-sugar pyrophosphatase	NUDT5	>tr|A6NFX8|A6NFX8_HUMAN ADP-sugar pyrophosphatase OS=Homo sapiens GN=NUDT5 PE=1 SV=1;>sp|Q9UKK9|NUDT5_HUMAN ADP-sugar pyrophosphatase OS=Homo sapiens GN=NUDT5 PE=1 SV=1;>tr|A6NJU6|A6NJU6_HUMAN ADP-sugar pyrophosphatase OS=Homo sapiens GN=NUDT5 PE=1 SV=2;>t	6	9	9	9	44.4	44.4	44.4	25.895	232	232;219;186;180;137;98	0	31.91	0.22282	0.86209	20.863	9	0	Median	0.94842	0.97712	6.2664	9	0	Median	4.2865	1.1163	18.694	9	0	Median	381640000	171990000	40024000	169630000				207	3244;5265;6858;7492;10370;10780;12779;13141;14795	True;True;True;True;True;True;True;True;True	3338;5402;7052;7709;10742;11163;13222;13598;15318	7209;11641;15316;16904;23421;24223;28688;28689;29535;33792
H3BMT0;H3BTV5;H3BU16;A6NGP5;H3BMV3;Q9H910;H3BMM8;B4E1P3	H3BMT0;H3BTV5;H3BU16;A6NGP5;H3BMV3;Q9H910	3;3;3;3;3;3;1;1	3;3;3;3;3;3;1;1	3;3;3;3;3;3;1;1	Hematological and neurological expressed 1-like protein	HN1L	>tr|H3BMT0|H3BMT0_HUMAN Hematological and neurological-expressed 1-like protein (Fragment) OS=Homo sapiens GN=HN1L PE=1 SV=1;>tr|H3BTV5|H3BTV5_HUMAN Hematological and neurological-expressed 1-like protein (Fragment) OS=Homo sapiens GN=HN1L PE=1 SV=1;>tr|H3	8	3	3	3	39.1	39.1	39.1	12.23	115	115;116;167;178;190;190;70;98	0	16.604	0.28193	1.1453	37.588	4	4	Median	1.0545	1.0895	1.2825	4	4	Median	3.7394	0.96359	36.908	4	4	Median	64941000	26763000	8818500	29359000				208	4990;9334;13035	True;True;True	5122;9601;13489	11061;11062;21264;29316;29317
A6NHQ2	A6NHQ2	2	1	1	rRNA/tRNA 2-O-methyltransferase fibrillarin-like protein 1	FBLL1	>sp|A6NHQ2|FBLL1_HUMAN rRNA/tRNA 2-O-methyltransferase fibrillarin-like protein 1 OS=Homo sapiens GN=FBLL1 PE=3 SV=2	1	2	1	1	6.6	3.3	3.3	34.803	334	334	0.0014479	1.5444	0.19193	0.75381	14.574	2	0	Median	0.73748	0.70809	7.4225	2	0	Median	4.069	1.0063	23.582	2	0	Median	78152000	38165000	9015500	30972000				209	6607;12881	False;True	6795;13334	14813;14814;14815;14816;28960;28961
J3KTL8;A6NHR9	J3KTL8;A6NHR9	4;4	4;4	4;4	Structural maintenance of chromosomes flexible hinge domain-containing protein 1	SMCHD1	>tr|J3KTL8|J3KTL8_HUMAN Structural maintenance of chromosomes flexible hinge domain-containing protein 1 (Fragment) OS=Homo sapiens GN=SMCHD1 PE=1 SV=1;>sp|A6NHR9|SMHD1_HUMAN Structural maintenance of chromosomes flexible hinge domain-containing protein 1	2	4	4	4	3	3	3	155.65	1388	1388;2005	0	7.2091	0.23721	0.89366	14.941	3	0	Median	1.0618	1.1108	1.3568	3	0	Median	4.5281	1.2833	16.461	3	0	Median	28422000	12162000	3432600	12827000				210	1185;3959;8825;12806	True;True;True;True	1232;4066;9074;13253	2746;2747;8750;8751;8752;8753;8754;20117;28764
A6NIR2;X6R7Y7;Q9Y547	A6NIR2;X6R7Y7;Q9Y547	1;1;1	1;1;1	1;1;1	Intraflagellar transport protein 25 homolog	HSPB11	>tr|A6NIR2|A6NIR2_HUMAN Chromosome 1 open reading frame 41, isoform CRA_b OS=Homo sapiens GN=HSPB11 PE=1 SV=1;>tr|X6R7Y7|X6R7Y7_HUMAN Intraflagellar transport protein 25 homolog OS=Homo sapiens GN=HSPB11 PE=1 SV=1;>sp|Q9Y547|IFT25_HUMAN Intraflagellar tran	3	1	1	1	10.7	10.7	10.7	13.028	112	112;214;144	0.0023629	1.3444	NaN	NaN	NaN	1	1	Median	NaN	NaN	NaN	1	1	Median	NaN	NaN	NaN	1	1	Median	6377200	2661400	691370	3024400				211	9127	TRUE	9387	20786
A6NJA2;P54578;J3QQT6;J3KS55	A6NJA2;P54578;J3QQT6;J3KS55	2;2;1;1	2;2;1;1	2;2;1;1	Ubiquitin carboxyl-terminal hydrolase;Ubiquitin carboxyl-terminal hydrolase 14	USP14	>tr|A6NJA2|A6NJA2_HUMAN Ubiquitin carboxyl-terminal hydrolase OS=Homo sapiens GN=USP14 PE=1 SV=2;>sp|P54578|UBP14_HUMAN Ubiquitin carboxyl-terminal hydrolase 14 OS=Homo sapiens GN=USP14 PE=1 SV=3;>tr|J3QQT6|J3QQT6_HUMAN Ubiquitin carboxyl-terminal hydrolas	4	2	2	2	5.4	5.4	5.4	51.086	448	448;494;20;28	0	9.1847	0.32344	1.3078	22.146	3	1	Median	1.0073	0.99434	5.4967	3	1	Plateau	2.9759	0.75264	30.881	3	1	Median	100780000	44499000	11335000	44946000				212	1338;8509	True;True	1387;8752	3125;19458;19459
A6NJD9;A8MVT4;A8MYK1;Q16540;H7C2P7	A6NJD9;A8MVT4;A8MYK1;Q16540;H7C2P7	3;3;3;3;2	3;3;3;3;2	3;3;3;3;2	39S ribosomal protein L23, mitochondrial	MRPL23	>tr|A6NJD9|A6NJD9_HUMAN 39S ribosomal protein L23, mitochondrial OS=Homo sapiens GN=MRPL23 PE=1 SV=1;>tr|A8MVT4|A8MVT4_HUMAN 39S ribosomal protein L23, mitochondrial OS=Homo sapiens GN=MRPL23 PE=1 SV=1;>tr|A8MYK1|A8MYK1_HUMAN 39S ribosomal protein L23, mit	5	3	3	3	27.6	27.6	27.6	18.529	163	163;166;191;153;118	0	23.377	0.26976	1.098	10.03	3	0	Median	0.95735	0.96738	0.53385	3	0	Median	3.5542	0.86559	10.126	3	0	Median	36968000	16422000	4543800	16002000				213	10319;10334;12880	True;True;True	10691;10706;13333	23329;23354;28959
A6NKB8;Q9H4A4;A0A087WU27;A0A087WUS4	A6NKB8;Q9H4A4;A0A087WU27	4;4;2;1	4;4;2;1	4;4;2;1	Aminopeptidase B	RNPEP	>tr|A6NKB8|A6NKB8_HUMAN Aminopeptidase B OS=Homo sapiens GN=RNPEP PE=1 SV=1;>sp|Q9H4A4|AMPB_HUMAN Aminopeptidase B OS=Homo sapiens GN=RNPEP PE=1 SV=2;>tr|A0A087WU27|A0A087WU27_HUMAN Aminopeptidase B (Fragment) OS=Homo sapiens GN=RNPEP PE=1 SV=1	4	4	4	4	11.3	11.3	11.3	68.168	611	611;650;171;151	0	17.389	0.24339	0.94122	60.564	6	4	Median	1.0358	1.0316	3.1948	6	4	Median	4.2639	1.0567	58.454	6	4	Median	123180000	55419000	16037000	51729000				214	367;1448;3323;13707	True;True;True;True	380;1500;3418;14180	746;3415;7419;7420;30911;30912
A6NNI4;G8JLH6;P21926	A6NNI4;G8JLH6;P21926	1;1;1	1;1;1	1;1;1	Tetraspanin;CD9 antigen	CD9	>tr|A6NNI4|A6NNI4_HUMAN Tetraspanin OS=Homo sapiens GN=CD9 PE=1 SV=1;>tr|G8JLH6|G8JLH6_HUMAN Tetraspanin (Fragment) OS=Homo sapiens GN=CD9 PE=1 SV=1;>sp|P21926|CD9_HUMAN CD9 antigen OS=Homo sapiens GN=CD9 PE=1 SV=4	3	1	1	1	6.3	6.3	6.3	17.764	159	159;228;228	0.0014368	1.4726	NaN	NaN	NaN	1	0	Median	NaN	NaN	NaN	1	0	Median	NaN	NaN	NaN	1	0	Median	17931000	6782200	2384900	8763900				215	6833	TRUE	7026	15268
H0YBA1;A6NNN6;E7ETA6;Q15154	H0YBA1;A6NNN6;E7ETA6;Q15154	1;1;1;1	1;1;1;1	1;1;1;1	Pericentriolar material 1 protein	PCM1	>tr|H0YBA1|H0YBA1_HUMAN Pericentriolar material 1 protein (Fragment) OS=Homo sapiens GN=PCM1 PE=1 SV=1;>tr|A6NNN6|A6NNN6_HUMAN Pericentriolar material 1 protein OS=Homo sapiens GN=PCM1 PE=1 SV=5;>tr|E7ETA6|E7ETA6_HUMAN Pericentriolar material 1 protein OS=	4	1	1	1	1.4	1.4	1.4	85.715	764	764;1860;2016;2024	0.0027791	1.2326	NaN	NaN	NaN	1	1	Median	NaN	NaN	NaN	1	1	Median	NaN	NaN	NaN	1	1	Median	1549800	670410	211890	667470				216	1127	TRUE	1167	2609
A6PVN5;Q15257;Q5T949;Q5T948;F6WIT2;Q68CR8;A6PVN6;A6PVN9;B7ZBQ0;A6PVN8;C9IZ76	A6PVN5;Q15257;Q5T949;Q5T948;F6WIT2;Q68CR8;A6PVN6;A6PVN9	4;4;3;3;3;2;2;2;1;1;1	4;4;3;3;3;2;2;2;1;1;1	4;4;3;3;3;2;2;2;1;1;1	Serine/threonine-protein phosphatase 2A activator	PPP2R4;DKFZp781M17165	>tr|A6PVN5|A6PVN5_HUMAN Serine/threonine-protein phosphatase 2A activator OS=Homo sapiens GN=PPP2R4 PE=1 SV=1;>sp|Q15257|PTPA_HUMAN Serine/threonine-protein phosphatase 2A activator OS=Homo sapiens GN=PPP2R4 PE=1 SV=3;>tr|Q5T949|Q5T949_HUMAN Serine/threoni	11	4	4	4	19.1	19.1	19.1	37.375	329	329;358;250;254;288;104;176;263;61;129;132	0	10.107	0.23903	1.0203	15.356	4	2	Median	0.74087	0.67282	7.304	4	2	Median	3.2485	0.71646	18.654	4	2	Median	42251000	21722000	4687400	15842000				217	3697;6850;7497;13458	True;True;True;True	3795;7044;7714;13924	8166;8167;15306;16909;16910;30297
J3QLE5;A8MT02;P63162;P14678;J3KRY3;S4R3P3	J3QLE5;A8MT02;P63162;P14678;J3KRY3;S4R3P3	6;6;6;6;3;3	6;6;6;6;3;3	6;6;6;6;3;3	Small nuclear ribonucleoprotein-associated protein N;Small nuclear ribonucleoprotein-associated proteins B and B	SNRPN;SNRPB	>tr|J3QLE5|J3QLE5_HUMAN Small nuclear ribonucleoprotein-associated protein N (Fragment) OS=Homo sapiens GN=SNRPN PE=4 SV=1;>tr|A8MT02|A8MT02_HUMAN Small nuclear ribonucleoprotein-associated proteins B and B OS=Homo sapiens GN=SNRPB PE=1 SV=3;>sp|P63162|RS	6	6	6	6	30.8	30.8	30.8	17.546	169	169;288;240;240;59;70	0	15.414	0.25048	1.0263	8.3596	8	0	Median	0.99285	1.0052	3.5772	8	0	Median	3.9662	1.0261	12.255	8	0	Median	494270000	212150000	60306000	221810000				218	1931;4344;5777;9533;11019;14051	True;True;True;True;True;True	1990;4459;5926;9847;11411;14543	4474;9539;9540;12881;12882;21703;24783;24784;31955;31956;31957
H3BQG3;A8MT40;Q8NCN5	H3BQG3;A8MT40;Q8NCN5	1;1;1	1;1;1	1;1;1	Pyruvate dehydrogenase phosphatase regulatory subunit, mitochondrial	PDPR	>tr|H3BQG3|H3BQG3_HUMAN Pyruvate dehydrogenase phosphatase regulatory subunit, mitochondrial OS=Homo sapiens GN=PDPR PE=1 SV=1;>tr|A8MT40|A8MT40_HUMAN Pyruvate dehydrogenase phosphatase regulatory subunit, mitochondrial OS=Homo sapiens GN=PDPR PE=1 SV=2;>s	3	1	1	1	3.7	3.7	3.7	54.79	491	491;779;879	0	3.5596	NaN	NaN	NaN	1	0	Median	NaN	NaN	NaN	1	0	Median	NaN	NaN	NaN	1	0	Median	3310300	1503200	630060	1177000				219	6246	TRUE	6417	14005
A8MU39;H0YDU8;P53041	A8MU39;H0YDU8;P53041	1;1;1	1;1;1	1;1;1	Serine/threonine-protein phosphatase;Serine/threonine-protein phosphatase 5	PPP5C	>tr|A8MU39|A8MU39_HUMAN Serine/threonine-protein phosphatase OS=Homo sapiens GN=PPP5C PE=1 SV=1;>tr|H0YDU8|H0YDU8_HUMAN Serine/threonine-protein phosphatase (Fragment) OS=Homo sapiens GN=PPP5C PE=1 SV=1;>sp|P53041|PPP5_HUMAN Serine/threonine-protein phosph	3	1	1	1	3.5	3.5	3.5	42.394	371	371;485;499	0	2.4653	NaN	NaN	NaN	1	1	Median	NaN	NaN	NaN	1	1	Median	NaN	NaN	NaN	1	1	Median	28539000	12014000	4343000	12183000				220	493	TRUE	510	1069
A8MU58;F8W950;Q13155	A8MU58;F8W950;Q13155	1;1;1	1;1;1	1;1;1	Aminoacyl tRNA synthase complex-interacting multifunctional protein 2	AIMP2	>tr|A8MU58|A8MU58_HUMAN Aminoacyl tRNA synthase complex-interacting multifunctional protein 2 OS=Homo sapiens GN=AIMP2 PE=1 SV=2;>tr|F8W950|F8W950_HUMAN Aminoacyl tRNA synthase complex-interacting multifunctional protein 2 OS=Homo sapiens GN=AIMP2 PE=1 SV=	3	1	1	1	3.7	3.7	3.7	26.76	242	242;251;320	0	3.2529	NaN	NaN	NaN	1	0	Median	NaN	NaN	NaN	1	0	Median	NaN	NaN	NaN	1	0	Median	10995000	5251600	1052400	4691200				221	3797	TRUE	3900	8456
H7BY10;K7ERT8;A8MUS3;P62750;K7EJV9;K7EMA7	H7BY10;K7ERT8;A8MUS3;P62750;K7EJV9;K7EMA7	9;9;9;9;8;6	9;9;9;9;8;6	9;9;9;9;8;6	60S ribosomal protein L23a	RPL23A	>tr|H7BY10|H7BY10_HUMAN 60S ribosomal protein L23a (Fragment) OS=Homo sapiens GN=RPL23A PE=1 SV=1;>tr|K7ERT8|K7ERT8_HUMAN 60S ribosomal protein L23a (Fragment) OS=Homo sapiens GN=RPL23A PE=1 SV=1;>tr|A8MUS3|A8MUS3_HUMAN 60S ribosomal protein L23a OS=Homo s	6	9	9	9	36.7	36.7	36.7	17.692	158	158;175;194;156;170;70	0	31.956	0.2697	1.0777	10.115	16	0	Median	0.95686	0.97709	4.5064	16	0	Median	3.4801	0.9127	12.077	16	0	Median	777760000	339470000	101620000	336680000				222	3893;7080;7375;7376;9255;9923;9924;14262;14263	True;True;True;True;True;True;True;True;True	3998;7277;7587;7588;9519;10276;10277;14768;14769	8632;15741;15742;15743;16536;16537;16538;16539;21118;22508;22509;32454;32455;32456;32457;32458;32459
H7C0D7;H7C2R1;A8MVM8;S4R3T6;A8MYJ8;O95167	H7C0D7;H7C2R1;A8MVM8;S4R3T6;A8MYJ8;O95167	1;1;1;1;1;1	1;1;1;1;1;1	1;1;1;1;1;1	NADH dehydrogenase [ubiquinone] 1 alpha subcomplex subunit 3	NDUFA3	>tr|H7C0D7|H7C0D7_HUMAN NADH dehydrogenase [ubiquinone] 1 alpha subcomplex subunit 3 (Fragment) OS=Homo sapiens GN=NDUFA3 PE=1 SV=1;>tr|H7C2R1|H7C2R1_HUMAN NADH dehydrogenase [ubiquinone] 1 alpha subcomplex subunit 3 (Fragment) OS=Homo sapiens GN=NDUFA3 PE	6	1	1	1	20.6	20.6	20.6	3.7873	34	34;69;72;73;81;84	1	-2	NaN	NaN	NaN	1	1	Median	NaN	NaN	NaN	1	1	Median	NaN	NaN	NaN	1	1	Median	1808600	789410	201940	817220	+			223	15387	TRUE	15931	35140
Q49AN9;F5H013;P62308;A8MWD9	Q49AN9;F5H013;P62308;A8MWD9	1;1;1;1	1;1;1;1	1;1;1;1	Small nuclear ribonucleoprotein G;Putative small nuclear ribonucleoprotein G-like protein 15	SNRPG;SNRPGP15	>tr|Q49AN9|Q49AN9_HUMAN SNRPG protein OS=Homo sapiens GN=SNRPG PE=1 SV=1;>tr|F5H013|F5H013_HUMAN Small nuclear ribonucleoprotein G OS=Homo sapiens GN=SNRPG PE=1 SV=1;>sp|P62308|RUXG_HUMAN Small nuclear ribonucleoprotein G OS=Homo sapiens GN=SNRPG PE=1 SV=1	4	1	1	1	20.3	20.3	20.3	7.1013	64	64;68;76;76	0	5.4772	0.29183	1.1804	6.1136	2	0	Median	1.0329	1.0052	5.3711	2	0	Median	3.5909	0.89351	2.1278	2	0	Median	7942100	3395100	1131500	3415500				224	4853	TRUE	4981;4982	10760;10761
A8MXB7;Q9Y343	A8MXB7;Q9Y343	1;1	1;1	1;1	Sorting nexin-24	SNX24	>tr|A8MXB7|A8MXB7_HUMAN Sorting nexin-24 OS=Homo sapiens GN=SNX24 PE=1 SV=1;>sp|Q9Y343|SNX24_HUMAN Sorting nexin-24 OS=Homo sapiens GN=SNX24 PE=1 SV=1	2	1	1	1	4.5	4.5	4.5	23.728	202	202;169	0.00098765	1.773	NaN	NaN	NaN	1	1	Median	NaN	NaN	NaN	1	1	Median	NaN	NaN	NaN	1	1	Median	2450100	1039400	437840	972830				225	7661	TRUE	7883	17276
A8MXP9;P43243;D6REM6;D6R991;B3KM87;H0Y8T4;Q68E03;D6R8Z5;D6RBI2;D6RBK5;D6RE02;D6RIA2;D6RB45;D6R9F3;D6RAM9;D6RAY2;D6RBS2;D6RCM3;D6REK4	A8MXP9;P43243;D6REM6;D6R991	24;24;21;16;11;8;4;3;3;3;3;3;2;2;2;2;2;2;2	24;24;21;16;11;8;4;3;3;3;3;3;2;2;2;2;2;2;2	24;24;21;16;11;8;4;3;3;3;3;3;2;2;2;2;2;2;2	Matrin-3	MATR3	>tr|A8MXP9|A8MXP9_HUMAN Matrin-3 OS=Homo sapiens GN=MATR3 PE=1 SV=1;>sp|P43243|MATR3_HUMAN Matrin-3 OS=Homo sapiens GN=MATR3 PE=1 SV=2;>tr|D6REM6|D6REM6_HUMAN Matrin-3 OS=Homo sapiens GN=MATR3 PE=1 SV=1;>tr|D6R991|D6R991_HUMAN Matrin-3 (Fragment) OS=Homo s	19	24	24	24	33.2	33.2	33.2	99.966	895	895;847;794;433;509;334;283;107;109;121;125;172;47;78;81;86;87;99;100	0	98.312	0.24302	0.97128	12.029	32	0	Median	1.0313	0.99571	7.2436	32	0	Median	4.1764	1.014	12.628	32	0	Median	932370000	409980000	115210000	407170000				226	1125;2297;2380;2497;3573;4212;4270;4547;4847;4893;5876;6567;7477;10219;10992;10999;11095;11290;11895;12423;13503;13848;14667;15320	True;True;True;True;True;True;True;True;True;True;True;True;True;True;True;True;True;True;True;True;True;True;True;True	1165;2366;2450;2451;2575;3670;4324;4384;4669;4975;5023;6027;6755;7693;10588;11379;11386;11490;11690;12309;12851;13969;14325;15185;15186;15863	2606;5232;5233;5396;5397;5398;5399;5400;5644;7947;7948;7949;7950;9282;9392;9393;10024;10729;10846;10847;10848;10849;13123;13124;13125;13126;13127;13128;14747;16815;23159;23160;23161;24730;24740;24946;25315;25316;26737;27869;30408;31349;31350;31351;31352;31353;33533;33534;33535;35001;35002;35003;35004;35005;35006;35007;35008
J3QR71;J3QRI9;J3QKW7;A8MZF9;P55039	J3QR71;J3QRI9;J3QKW7;A8MZF9;P55039	1;1;1;1;1	1;1;1;1;1	1;1;1;1;1	Developmentally-regulated GTP-binding protein 2	DRG2	>tr|J3QR71|J3QR71_HUMAN Developmentally-regulated GTP-binding protein 2 (Fragment) OS=Homo sapiens GN=DRG2 PE=1 SV=1;>tr|J3QRI9|J3QRI9_HUMAN Developmentally-regulated GTP-binding protein 2 OS=Homo sapiens GN=DRG2 PE=1 SV=1;>tr|J3QKW7|J3QKW7_HUMAN Developme	5	1	1	1	12.7	12.7	12.7	16.906	158	158;172;244;343;364	0	18.182	0.27528	1.0635	26.27	2	1	Median	1.056	1.0298	3.0598	2	1	Median	3.628	0.89689	15.327	2	1	Median	15038000	7042100	1642000	6354400				227	4204	TRUE	4316	9261;9262
A9Z1X7;Q8IYB3;E9PCT1;M0R1E7;M0R088;M0QXG5	A9Z1X7;Q8IYB3;E9PCT1;M0R1E7;M0R088	4;4;3;2;2;1	4;4;3;2;2;1	4;4;3;2;2;1	Serine/arginine repetitive matrix protein 1	SRRM1	>tr|A9Z1X7|A9Z1X7_HUMAN Serine/arginine repetitive matrix protein 1 OS=Homo sapiens GN=SRRM1 PE=1 SV=1;>sp|Q8IYB3|SRRM1_HUMAN Serine/arginine repetitive matrix protein 1 OS=Homo sapiens GN=SRRM1 PE=1 SV=2;>tr|E9PCT1|E9PCT1_HUMAN Serine/arginine repetitive	6	4	4	4	7.7	7.7	7.7	103.39	913	913;904;820;79;681;102	0	6.0098	0.10179	0.40026	25.102	7	7	Median	1.0777	1.0151	2.767	7	7	Median	10.946	2.9083	28.534	7	7	Median	46983000	20676000	2714100	23593000				228	1645;3496;13917;14242	True;True;True;True	1699;3593;14403;14747	3833;3834;7777;7778;31565;32393;32394
B0QY89;Q9Y262;H7C3A0;C9JHP4;C9K0Q7;B0QY90	B0QY89;Q9Y262;H7C3A0;C9JHP4;C9K0Q7	3;3;2;2;2;1	3;3;2;2;2;1	3;3;2;2;2;1	Eukaryotic translation initiation factor 3 subunit L	EIF3L	>tr|B0QY89|B0QY89_HUMAN Eukaryotic translation initiation factor 3 subunit L OS=Homo sapiens GN=EIF3L PE=1 SV=1;>sp|Q9Y262|EIF3L_HUMAN Eukaryotic translation initiation factor 3 subunit L OS=Homo sapiens GN=EIF3L PE=1 SV=1;>tr|H7C3A0|H7C3A0_HUMAN Eukaryoti	6	3	3	3	6.3	6.3	6.3	70.901	607	607;564;127;150;183;466	0	6.9432	0.28337	1.0799	19.492	3	0	Median	1.0236	0.97961	11.053	3	0	Median	3.3255	0.88611	18.979	3	0	Median	42363000	18473000	5925000	17966000				229	9522;13226;14489	True;True;True	9836;13686;15000	21692;29728;33004
B0QYA5;O15371;B0QYA4;B0QYA8;B0QYA6	B0QYA5;O15371;B0QYA4;B0QYA8;B0QYA6	2;2;1;1;1	2;2;1;1;1	2;2;1;1;1	Eukaryotic translation initiation factor 3 subunit D	EIF3D	>tr|B0QYA5|B0QYA5_HUMAN Eukaryotic translation initiation factor 3 subunit D (Fragment) OS=Homo sapiens GN=EIF3D PE=1 SV=1;>sp|O15371|EIF3D_HUMAN Eukaryotic translation initiation factor 3 subunit D OS=Homo sapiens GN=EIF3D PE=1 SV=1;>tr|B0QYA4|B0QYA4_HUMA	5	2	2	2	12.3	12.3	12.3	31.729	269	269;548;105;123;173	0	48.132	0.25169	0.95917	4.3433	3	0	Median	0.95841	0.91724	6.6869	3	0	Median	3.9743	1.0509	6.3271	3	0	Median	53718000	22968000	6432100	24318000				230	12991;13317	True;True	13445;13780	29222;29223;29917
H3BQQ9;B0QYN7;P63279;H3BPC4;H3BRD1	H3BQQ9;B0QYN7;P63279;H3BPC4	6;6;6;5;1	6;6;6;5;1	6;6;6;5;1	SUMO-conjugating enzyme UBC9	UBE2I	>tr|H3BQQ9|H3BQQ9_HUMAN SUMO-conjugating enzyme UBC9 (Fragment) OS=Homo sapiens GN=UBE2I PE=1 SV=1;>tr|B0QYN7|B0QYN7_HUMAN SUMO-conjugating enzyme UBC9 OS=Homo sapiens GN=UBE2I PE=1 SV=1;>sp|P63279|UBC9_HUMAN SUMO-conjugating enzyme UBC9 OS=Homo sapiens GN	5	6	6	6	32.1	32.1	32.1	15.516	137	137;184;158;70;29	0	13.829	0.26075	1.0648	15.194	10	0	Median	0.95084	0.96834	10.648	10	0	Median	3.7752	0.93082	10.5	10	0	Median	211030000	93476000	26478000	91075000				231	2176;5070;6823;6923;9517;11342	True;True;True;True;True;True	2245;5202;7015;7119;9830;11747	5010;5011;5012;11206;11207;15252;15448;15449;15450;15451;21683;21684;21685;21686;25440;25441
B0QYV8;H0Y6A0;Q9NP61	B0QYV8;H0Y6A0;Q9NP61	1;1;1	1;1;1	1;1;1	ADP-ribosylation factor GTPase-activating protein 3	ARFGAP3	>tr|B0QYV8|B0QYV8_HUMAN ADP-ribosylation factor GTPase-activating protein 3 (Fragment) OS=Homo sapiens GN=ARFGAP3 PE=1 SV=1;>tr|H0Y6A0|H0Y6A0_HUMAN ADP-ribosylation factor GTPase-activating protein 3 (Fragment) OS=Homo sapiens GN=ARFGAP3 PE=1 SV=1;>sp|Q9NP	3	1	1	1	6.6	6.6	6.6	16.404	152	152;273;516	0.00625	1.0038	NaN	NaN	NaN	1	1	Median	NaN	NaN	NaN	1	1	Median	NaN	NaN	NaN	1	1	Median	7025000	3216100	923600	2885400				232	1599	TRUE	1653	3742
B0YIW6;P48444;Q6P1Q5	B0YIW6;P48444	8;8;3	8;8;3	8;8;3	Coatomer subunit delta	ARCN1	>tr|B0YIW6|B0YIW6_HUMAN Archain 1, isoform CRA_a OS=Homo sapiens GN=ARCN1 PE=1 SV=1;>sp|P48444|COPD_HUMAN Coatomer subunit delta OS=Homo sapiens GN=ARCN1 PE=1 SV=1	3	8	8	8	17.2	17.2	17.2	61.626	552	552;511;189	0	20.581	0.25456	0.97686	11.934	8	0	Median	0.98356	0.97454	4.4798	8	0	Median	3.9083	0.95433	12.962	8	0	Median	133950000	58206000	17610000	58130000				233	3202;5158;7689;9278;10193;10225;13370;14589	True;True;True;True;True;True;True;True	3296;5293;7911;9542;10560;10594;13834;15103	7135;11399;17331;21171;21172;23087;23168;30033;30034;33309
B1AH87;P30536	B1AH87;P30536	1;1	1;1	1;1	Translocator protein	TSPO	>tr|B1AH87|B1AH87_HUMAN Putative peripheral benzodiazepine receptor-related protein (Fragment) OS=Homo sapiens GN=TSPO PE=1 SV=1;>sp|P30536|TSPOA_HUMAN Translocator protein OS=Homo sapiens GN=TSPO PE=1 SV=3	2	1	1	1	21.5	21.5	21.5	11.896	107	107;169	0	9.7931	0.2715	1.1742	1.7428	2	0	Median	1.0231	1.0482	2.2014	2	0	Median	3.8216	0.89847	7.5719	2	0	Median	13210000	5627200	1731900	5850600				234	1264	TRUE	1312	2914;2915
B1AHB1;P33992;B1AHB2;B1AHA9	B1AHB1;P33992	18;18;4;2	18;18;4;2	18;18;4;2	DNA helicase;DNA replication licensing factor MCM5	MCM5	>tr|B1AHB1|B1AHB1_HUMAN DNA helicase OS=Homo sapiens GN=MCM5 PE=1 SV=1;>sp|P33992|MCM5_HUMAN DNA replication licensing factor MCM5 OS=Homo sapiens GN=MCM5 PE=1 SV=5	4	18	18	18	29.8	29.8	29.8	77.592	691	691;734;150;231	0	53.022	0.20471	0.78216	18.115	14	0	Median	1.1268	1.0733	6.8715	14	0	Median	5.4669	1.4302	17.464	14	0	Median	338050000	140120000	33726000	164200000				235	582;695;696;1981;3509;5392;6304;7269;8645;8699;8778;9507;10229;10570;10850;11260;14050;14136	True;True;True;True;True;True;True;True;True;True;True;True;True;True;True;True;True;True	602;723;724;2043;3606;5530;6477;7475;8889;8946;9026;9817;10598;10951;11234;11660;14542;14632	1284;1609;1610;1611;4552;7804;7805;11980;14124;14125;16292;16293;19750;19853;20030;21658;23173;23802;23803;24354;25267;25268;31954;32146
B1AHD1;P55769	B1AHD1;P55769	6;6	6;6	6;6	NHP2-like protein 1;NHP2-like protein 1, N-terminally processed	NHP2L1	>tr|B1AHD1|B1AHD1_HUMAN NHP2-like protein 1 OS=Homo sapiens GN=NHP2L1 PE=1 SV=1;>sp|P55769|NH2L1_HUMAN NHP2-like protein 1 OS=Homo sapiens GN=NHP2L1 PE=1 SV=3	2	6	6	6	39.4	39.4	39.4	14.627	132	132;128	0	51.237	0.23182	1.0439	11.822	13	0	Median	0.96997	0.98038	6.96	13	0	Median	4.1775	0.9798	12.151	13	0	Median	387000000	174500000	43988000	168520000				236	240;1871;1872;7048;8128;10667	True;True;True;True;True;True	245;1929;1930;7245;8358;11050	467;468;469;470;4327;4328;4329;4330;15684;15685;18573;18574;23986;23987
B1AKD8;Q5TZA2	B1AKD8;Q5TZA2	1;1	1;1	1;1	Rootletin	CROCC	>tr|B1AKD8|B1AKD8_HUMAN Rootletin (Fragment) OS=Homo sapiens GN=CROCC PE=1 SV=2;>sp|Q5TZA2|CROCC_HUMAN Rootletin OS=Homo sapiens GN=CROCC PE=1 SV=1	2	1	1	1	0.6	0.6	0.6	149.06	1311	1311;2017	0.00050302	1.9657	NaN	NaN	NaN	1	0	Median	NaN	NaN	NaN	1	0	Median	NaN	NaN	NaN	1	0	Median	110740000	44827000	14645000	51265000				237	7360	TRUE	7570	16494
B1AKV2;B1AKV6;B1AKV3;Q9NVA1	B1AKV2;B1AKV6;B1AKV3;Q9NVA1	1;1;1;1	1;1;1;1	1;1;1;1	Ubiquinol-cytochrome-c reductase complex assembly factor 1	UQCC1	>tr|B1AKV2|B1AKV2_HUMAN Ubiquinol-cytochrome-c reductase complex assembly factor 1 OS=Homo sapiens GN=UQCC1 PE=1 SV=1;>tr|B1AKV6|B1AKV6_HUMAN Ubiquinol-cytochrome-c reductase complex assembly factor 1 (Fragment) OS=Homo sapiens GN=UQCC1 PE=1 SV=1;>tr|B1AKV	4	1	1	1	4.1	4.1	4.1	25.49	221	221;243;249;299	0.00098232	1.7284	NaN	NaN	NaN	1	1	Median	NaN	NaN	NaN	1	1	Median	NaN	NaN	NaN	1	1	Median	1484000	536590	230110	717320				238	12390	TRUE	12816	27790
B1AKZ5;Q15121	B1AKZ5;Q15121	4;4	4;4	4;4	Astrocytic phosphoprotein PEA-15	PEA15	>tr|B1AKZ5|B1AKZ5_HUMAN Astrocytic phosphoprotein PEA-15 OS=Homo sapiens GN=PEA15 PE=1 SV=1;>sp|Q15121|PEA15_HUMAN Astrocytic phosphoprotein PEA-15 OS=Homo sapiens GN=PEA15 PE=1 SV=2	2	4	4	4	50	50	50	12.53	108	108;130	0	15.855	0.24088	1.0403	4.0525	3	0	Median	0.96564	0.97227	4.5916	3	0	Median	3.7734	0.91881	9.7853	3	0	Median	93255000	40989000	12633000	39633000				239	446;6438;10654;10962	True;True;True;True	463;6614;11037;11349	932;933;14417;23972;24677
H0YBU8;H0Y6Y8;B1AL05;Q8N983	H0YBU8;H0Y6Y8;B1AL05;Q8N983	2;2;2;2	2;2;2;2	2;2;2;2	39S ribosomal protein L43, mitochondrial	MRPL43	>tr|H0YBU8|H0YBU8_HUMAN 39S ribosomal protein L43, mitochondrial (Fragment) OS=Homo sapiens GN=MRPL43 PE=1 SV=1;>tr|H0Y6Y8|H0Y6Y8_HUMAN 39S ribosomal protein L43, mitochondrial (Fragment) OS=Homo sapiens GN=MRPL43 PE=1 SV=1;>tr|B1AL05|B1AL05_HUMAN 39S ribo	4	2	2	2	14.9	14.9	14.9	16.567	148	148;169;184;215	0	12.467	0.22898	0.95081	8.9154	2	0	Median	0.94658	0.96401	12.427	2	0	Median	4.4452	1.0698	17.497	2	0	Median	23567000	10586000	2682100	10299000				240	7294;12149	True;True	7500;12566	16350;27275
B1AMU3;Q9Y3B2;R4GNH9;R4GMQ7;B1AMU7;B1AMU4	B1AMU3;Q9Y3B2;R4GNH9;R4GMQ7;B1AMU7;B1AMU4	2;2;1;1;1;1	2;2;1;1;1;1	2;2;1;1;1;1	Exosome complex component CSL4	EXOSC1	>tr|B1AMU3|B1AMU3_HUMAN Exosome complex component CSL4 OS=Homo sapiens GN=EXOSC1 PE=1 SV=1;>sp|Q9Y3B2|EXOS1_HUMAN Exosome complex component CSL4 OS=Homo sapiens GN=EXOSC1 PE=1 SV=1;>tr|R4GNH9|R4GNH9_HUMAN Exosome complex component CSL4 OS=Homo sapiens GN=E	6	2	2	2	15.9	15.9	15.9	18.816	170	170;195;139;143;165;178	0	37.37	0.21436	0.79753	0.89855	2	0	Median	0.77387	0.78454	7.4047	2	0	Median	3.5311	0.91266	9.4005	2	0	Median	20955000	9149000	3295700	8510800				241	1562;7471	True;True	1616;7687	3665;16805
B1ANH5;Q16774;B1ANH0;B1ANG9;B1ANH6;B1ANH2;B1ANH3	B1ANH5;Q16774;B1ANH0;B1ANG9;B1ANH6;B1ANH2;B1ANH3	2;2;1;1;1;1;1	2;2;1;1;1;1;1	2;2;1;1;1;1;1	Guanylate kinase	GUK1	>tr|B1ANH5|B1ANH5_HUMAN Guanylate kinase OS=Homo sapiens GN=GUK1 PE=1 SV=1;>sp|Q16774|KGUA_HUMAN Guanylate kinase OS=Homo sapiens GN=GUK1 PE=1 SV=2;>tr|B1ANH0|B1ANH0_HUMAN Guanylate kinase (Fragment) OS=Homo sapiens GN=GUK1 PE=1 SV=1;>tr|B1ANG9|B1ANG9_HUMA	7	2	2	2	19.1	19.1	19.1	21.999	199	199;197;217;235;242;253;272	0	5.6133	0.25211	1.0195	18.31	2	0	Median	1.0138	1.0569	2.6339	2	0	Median	3.941	0.96162	12.838	2	0	Median	21655000	9367000	2550500	9737100				242	1552;11367	True;True	1606;11772	3642;25484
B1ANR0;Q13310;H0Y5F5;B1ANR1;H0YEU6;H0YEQ8;H0YCC8	B1ANR0;Q13310;H0Y5F5	12;12;8;5;4;3;2	5;5;3;2;2;1;1	4;4;3;1;2;0;1	Polyadenylate-binding protein;Polyadenylate-binding protein 4	PABPC4	>tr|B1ANR0|B1ANR0_HUMAN Polyadenylate-binding protein OS=Homo sapiens GN=PABPC4 PE=1 SV=1;>sp|Q13310|PABP4_HUMAN Polyadenylate-binding protein 4 OS=Homo sapiens GN=PABPC4 PE=1 SV=1;>tr|H0Y5F5|H0Y5F5_HUMAN Polyadenylate-binding protein (Fragment) OS=Homo sa	7	12	5	4	26.2	10.7	9.3	67.97	615	615;644;550;129;249;112;197	0	11.663	0.27992	1.1239	10.025	4	0	Median	0.99919	0.99513	12.706	4	0	Median	3.5057	0.84554	7.9891	4	0	Median	192400000	80914000	26458000	85030000				243	809;891;1128;2829;3990;4389;6549;6644;9811;11384;11518;11608	False;False;False;True;True;False;False;True;True;True;False;False	840;923;1168;2915;4100;4507;6734;6735;6832;10162;11790;11926;12016	1865;1866;2051;2610;2611;2612;2613;6374;8823;9648;9649;14711;14712;14903;22309;22310;25517;25849;26041;26042
H3BLV0;B1AP13;H7BY55;P08174	H3BLV0;B1AP13;H7BY55;P08174	1;1;1;1	1;1;1;1	1;1;1;1	Complement decay-accelerating factor	CD55	>tr|H3BLV0|H3BLV0_HUMAN Complement decay-accelerating factor (Fragment) OS=Homo sapiens GN=CD55 PE=1 SV=1;>tr|B1AP13|B1AP13_HUMAN Complement decay-accelerating factor OS=Homo sapiens GN=CD55 PE=1 SV=1;>tr|H7BY55|H7BY55_HUMAN Complement decay-accelerating f	4	1	1	1	2.5	2.5	2.5	35.695	326	326;444;550;381	0.0014437	1.5143	NaN	NaN	NaN	1	0	Median	NaN	NaN	NaN	1	0	Median	NaN	NaN	NaN	1	0	Median	25433000	9895500	3419700	12118000				244	8934	TRUE	9184	20379
G3V4W0;B4DY08;B2R5W2;P07910;G3V576;G3V4C1;G3V2Q1;G3V555;G3V575;G3V5X6;G3V3K6;G3V251;B4DSU6;G3V4M8;G3V2H6;G3V5V7;G3V2D6;P0DMR1;O60812;B7ZW38;B2RXH8	G3V4W0;B4DY08;B2R5W2;P07910;G3V576;G3V4C1;G3V2Q1;G3V555;G3V575;G3V5X6;G3V3K6;G3V251;B4DSU6;G3V4M8	12;12;12;12;11;11;11;9;9;7;7;7;7;6;5;5;5;5;5;5;5	12;12;12;12;11;11;11;9;9;7;7;7;7;6;5;5;5;5;5;5;5	12;12;12;12;11;11;11;9;9;7;7;7;7;6;5;5;5;5;5;5;5	Heterogeneous nuclear ribonucleoproteins C1/C2	HNRNPC	>tr|G3V4W0|G3V4W0_HUMAN Heterogeneous nuclear ribonucleoproteins C1/C2 (Fragment) OS=Homo sapiens GN=HNRNPC PE=1 SV=1;>tr|B4DY08|B4DY08_HUMAN Heterogeneous nuclear ribonucleoproteins C1/C2 OS=Homo sapiens GN=HNRNPC PE=1 SV=1;>tr|B2R5W2|B2R5W2_HUMAN Heterog	21	12	12	12	45.4	45.4	45.4	28.916	262	262;288;290;306;231;292;305;175;187;117;121;126;147;66;54;180;214;293;293;293;293	0	51.468	0.22622	0.94827	12.261	38	0	Median	0.9705	0.94934	5.7808	38	0	Median	4.1548	1.0161	10.996	38	0	Median	3268700000	1436400000	376610000	1455700000				245	1490;4358;7150;8035;9473;9691;10430;10550;11170;13645;13646;14316	True;True;True;True;True;True;True;True;True;True;True;True	1542;4473;7349;8264;9775;10035;10036;10807;10808;10931;11565;14114;14115;14823	3509;3510;3511;9563;9564;9565;9566;15941;15942;15943;15944;15945;18342;18343;18344;18345;18346;18347;21581;21582;21583;21584;21585;22066;22067;22068;22069;22070;23541;23542;23543;23770;23771;23772;25079;25080;25081;30742;30743;30744;30745;30746;30747;30748;30749;30750;32573;32574;32575;32576
M0QZP4;B3KSI3;M0QZ10;M0QXF9;O15382	M0QZP4;B3KSI3;M0QZ10;M0QXF9;O15382	2;2;2;2;2	2;2;2;2;2	2;2;2;2;2	Branched-chain-amino-acid aminotransferase;Branched-chain-amino-acid aminotransferase, mitochondrial	BCAT2	>tr|M0QZP4|M0QZP4_HUMAN Branched-chain-amino-acid aminotransferase OS=Homo sapiens GN=BCAT2 PE=1 SV=1;>tr|B3KSI3|B3KSI3_HUMAN Branched-chain-amino-acid aminotransferase OS=Homo sapiens GN=BCAT2 PE=1 SV=1;>tr|M0QZ10|M0QZ10_HUMAN Branched-chain-amino-acid am	5	2	2	2	8.3	8.3	8.3	34.897	313	313;352;405;445;392	0	3.5747	0.24721	1.0055	33.032	2	0	Median	1.0848	1.0025	13.486	2	0	Median	4.608	1.0607	60.294	2	0	Median	24451000	9233600	3712200	11505000				246	1837;3386	True;True	1894;3483	4261;7544
B4DFG0;P35659;D6RDA2;D6R9L5;H0Y8X0;H0Y993	B4DFG0;P35659;D6RDA2	5;5;4;2;2;1	5;5;4;2;2;1	5;5;4;2;2;1	Protein DEK	DEK	>tr|B4DFG0|B4DFG0_HUMAN Protein DEK OS=Homo sapiens GN=DEK PE=1 SV=1;>sp|P35659|DEK_HUMAN Protein DEK OS=Homo sapiens GN=DEK PE=1 SV=1;>tr|D6RDA2|D6RDA2_HUMAN Protein DEK (Fragment) OS=Homo sapiens GN=DEK PE=1 SV=1	6	5	5	5	17	17	17	39.5	347	347;375;122;151;161;156	0	6.3969	0.23744	0.97308	9.2384	4	0	Median	0.98792	0.98817	8.113	4	0	Median	3.8991	1.0227	4.5562	4	0	Median	209850000	96345000	24542000	88959000				247	8107;8400;10265;11389;11421	True;True;True;True;True	8336;8633;10635;11795;11827	18528;19231;23236;25530;25605
B4DGU4;P35222;C9JTX4;C9J826;C9JK18;C9JKY1	B4DGU4;P35222	14;14;1;1;1;1	14;14;1;1;1;1	11;11;0;0;0;0	Catenin beta-1	CTNNB1	>tr|B4DGU4|B4DGU4_HUMAN Catenin beta-1 OS=Homo sapiens GN=CTNNB1 PE=1 SV=1;>sp|P35222|CTNB1_HUMAN Catenin beta-1 OS=Homo sapiens GN=CTNNB1 PE=1 SV=1	6	14	14	11	20.5	20.5	16	84.765	774	774;781;235;277;296;298	0	59.154	0.20396	0.84256	6.9641	10	0	Median	0.98854	0.96068	4.4353	10	0	Median	4.9362	1.1982	6.229	10	0	Median	146780000	64678000	16979000	65121000				248	213;1637;2873;4755;5420;7897;8287;9184;9186;9395;9791;11333;11854;12867	True;True;True;True;True;True;True;True;True;True;True;True;True;True	218;1691;2960;4881;5559;8122;8518;9444;9446;9679;10140;11737;12267;13318	399;3807;6461;10506;12037;17916;17917;18961;20923;20925;20926;20927;21411;22274;22275;25423;26663;28919
B4DHN5;E9PBU7;G5EA09;O00560	B4DHN5;E9PBU7;G5EA09;O00560	1;1;1;1	1;1;1;1	1;1;1;1	Syntenin-1	SDCBP	>tr|B4DHN5|B4DHN5_HUMAN Syntenin-1 OS=Homo sapiens GN=SDCBP PE=1 SV=1;>tr|E9PBU7|E9PBU7_HUMAN Syntenin-1 OS=Homo sapiens GN=SDCBP PE=1 SV=1;>tr|G5EA09|G5EA09_HUMAN Syndecan binding protein (Syntenin), isoform CRA_a OS=Homo sapiens GN=SDCBP PE=1 SV=1;>sp|O0	4	1	1	1	4.2	4.2	4.2	25.968	239	239;244;318;298	0.0023708	1.3717	NaN	NaN	NaN	0	0	Median	NaN	NaN	NaN	0	0	Median	NaN	NaN	NaN	0	0	Median	0	0	0	0				249	11656	TRUE	12064	26204
B4DJ81;P28331	B4DJ81;P28331	5;5	5;5	5;5	NADH-ubiquinone oxidoreductase 75 kDa subunit, mitochondrial	NDUFS1	>tr|B4DJ81|B4DJ81_HUMAN NADH-ubiquinone oxidoreductase 75 kDa subunit, mitochondrial OS=Homo sapiens GN=NDUFS1 PE=1 SV=1;>sp|P28331|NDUS1_HUMAN NADH-ubiquinone oxidoreductase 75 kDa subunit, mitochondrial OS=Homo sapiens GN=NDUFS1 PE=1 SV=3	2	5	5	5	9	9	9	66.921	611	611;727	0	10.219	0.5091	1.8527	62.874	5	4	Median	1.1219	1.095	8.0903	5	4	Median	2.4878	0.64027	64.514	5	4	Median	76180000	26566000	19413000	30201000				250	1688;3585;4753;11097;13417	True;True;True;True;True	1744;3682;4879;11492;13882	3946;7972;10504;24948;30213
B4DKB2;P42892	B4DKB2;P42892	1;1	1;1	1;1	Endothelin-converting enzyme 1	ECE1	>tr|B4DKB2|B4DKB2_HUMAN Endothelin-converting enzyme 1 OS=Homo sapiens GN=ECE1 PE=1 SV=1;>sp|P42892|ECE1_HUMAN Endothelin-converting enzyme 1 OS=Homo sapiens GN=ECE1 PE=1 SV=2	2	1	1	1	2	2	2	83.573	738	738;770	0.0066756	0.99536	NaN	NaN	NaN	1	0	Median	NaN	NaN	NaN	1	0	Median	NaN	NaN	NaN	1	0	Median	10427000	4167500	1862300	4397600				251	2424	TRUE	2498	5487
B4DKY1;P49589	B4DKY1;P49589	3;3	3;3	3;3	Cysteine--tRNA ligase, cytoplasmic	CARS	>tr|B4DKY1|B4DKY1_HUMAN Cysteine--tRNA ligase, cytoplasmic OS=Homo sapiens GN=CARS PE=1 SV=1;>sp|P49589|SYCC_HUMAN Cysteine--tRNA ligase, cytoplasmic OS=Homo sapiens GN=CARS PE=1 SV=3	2	3	3	3	4.5	4.5	4.5	84.277	739	739;748	0	3.4377	0.29345	1.1807	19.212	3	1	Median	0.8951	0.87294	10.233	3	1	Median	2.6953	0.69013	16.026	3	1	Median	17009000	7305800	3039700	6664000				252	866;6362;9167	True;True;True	898;6536;9427	2002;14253;20891
B4DLN1;Q9UBX3;F6RGN5;I3L1E8	B4DLN1;Q9UBX3;F6RGN5	6;5;3;2	6;5;3;2	5;5;3;2	Mitochondrial dicarboxylate carrier	SLC25A10	>tr|B4DLN1|B4DLN1_HUMAN Uncharacterized protein OS=Homo sapiens PE=2 SV=1;>sp|Q9UBX3|DIC_HUMAN Mitochondrial dicarboxylate carrier OS=Homo sapiens GN=SLC25A10 PE=1 SV=2;>tr|F6RGN5|F6RGN5_HUMAN Mitochondrial dicarboxylate carrier OS=Homo sapiens GN=SLC25A10	4	6	6	5	18.6	18.6	15.8	48.099	442	442;287;406;113	0	51.965	0.30735	1.2079	7.8122	7	0	Median	1.0899	1.1063	5.4264	7	0	Median	3.4993	0.90301	6.325	7	0	Median	248510000	98331000	33439000	116740000				253	4200;5014;7685;7826;10332;14088	True;True;True;True;True;True	4312;5146;7907;8050;10704;14581	9257;11111;11112;17326;17761;23351;32040;32041
B4DLR8;P15559;H3BRK3;H3BNV2	B4DLR8;P15559;H3BRK3;H3BNV2	9;9;7;6	9;9;7;6	9;9;7;6	NAD(P)H dehydrogenase [quinone] 1	NQO1	>tr|B4DLR8|B4DLR8_HUMAN NAD(P)H dehydrogenase [quinone] 1 OS=Homo sapiens GN=NQO1 PE=1 SV=1;>sp|P15559|NQO1_HUMAN NAD(P)H dehydrogenase [quinone] 1 OS=Homo sapiens GN=NQO1 PE=1 SV=1;>tr|H3BRK3|H3BRK3_HUMAN NAD(P)H dehydrogenase [quinone] 1 OS=Homo sapiens	4	9	9	9	39.1	39.1	39.1	22.793	202	202;274;269;253	0	25.957	0.18992	0.75527	23.349	13	0	Median	1.155	1.1702	3.6724	13	0	Median	6.1738	1.6078	21.544	13	0	Median	1504400000	631780000	136500000	736070000				254	978;2862;3681;6366;6367;8014;10801;11471;13044	True;True;True;True;True;True;True;True;True	1011;2949;3779;6540;6541;8243;11184;11879;13498	2246;2247;2248;2249;6433;6434;6435;6436;6437;8138;8139;14258;14259;14260;14261;14262;18220;18221;18222;18223;18224;18225;24256;25715;25716;25717;29335;29336;29337;29338
C9K0J2;F8WD51;C9J486;C9JIP2;B4DND0;Q16831	C9K0J2;F8WD51;C9J486;C9JIP2;B4DND0;Q16831	1;1;1;1;1;1	1;1;1;1;1;1	1;1;1;1;1;1	Uridine phosphorylase 1	UPP1	>tr|C9K0J2|C9K0J2_HUMAN Uridine phosphorylase 1 (Fragment) OS=Homo sapiens GN=UPP1 PE=1 SV=1;>tr|F8WD51|F8WD51_HUMAN Uridine phosphorylase 1 OS=Homo sapiens GN=UPP1 PE=1 SV=1;>tr|C9J486|C9J486_HUMAN Uridine phosphorylase 1 (Fragment) OS=Homo sapiens GN=UPP	6	1	1	1	65.5	65.5	65.5	3.0675	29	29;85;144;146;171;310	0	3.2373	NaN	NaN	NaN	1	1	Median	NaN	NaN	NaN	1	1	Median	NaN	NaN	NaN	1	1	Median	11571000	5340300	1160900	5070300				255	191	TRUE	196	338
C9JUN4;C9J168;B4DP31;Q14558;C9JKT9;C9JNQ3	C9JUN4;C9J168;B4DP31;Q14558;C9JKT9;C9JNQ3	2;2;2;2;1;1	2;2;2;2;1;1	2;2;2;2;1;1	Phosphoribosyl pyrophosphate synthase-associated protein 1	PRPSAP1	>tr|C9JUN4|C9JUN4_HUMAN Phosphoribosyl pyrophosphate synthase-associated protein 1 (Fragment) OS=Homo sapiens GN=PRPSAP1 PE=1 SV=2;>tr|C9J168|C9J168_HUMAN Phosphoribosyl pyrophosphate synthase-associated protein 1 (Fragment) OS=Homo sapiens GN=PRPSAP1 PE=1	6	2	2	2	19.1	19.1	19.1	17.524	157	157;230;282;356;89;104	0	7.4152	0.26238	0.97524	16.993	2	0	Median	1.0343	1.0099	1.2827	2	0	Median	4.0061	1.0327	15.568	2	0	Median	23203000	9734900	2612200	10856000				256	1492;9880	True;True	1544;10232	3514;22426
B4DQI4;Q96IU4;F8W9U3	B4DQI4;Q96IU4;F8W9U3	2;2;1	2;2;1	2;2;1	Alpha/beta hydrolase domain-containing protein 14B	ABHD14B	>tr|B4DQI4|B4DQI4_HUMAN Alpha/beta hydrolase domain-containing protein 14B OS=Homo sapiens GN=ABHD14B PE=1 SV=1;>sp|Q96IU4|ABHEB_HUMAN Alpha/beta hydrolase domain-containing protein 14B OS=Homo sapiens GN=ABHD14B PE=1 SV=1;>tr|F8W9U3|F8W9U3_HUMAN Alpha/bet	3	2	2	2	14.4	14.4	14.4	19.756	188	188;210;208	0	3.1759	0.28913	1.1199	19.944	4	3	Median	0.94414	0.95567	6.484	4	3	Median	3.2655	0.83354	25.219	4	3	Median	61571000	27764000	7387900	26418000				257	1655;3999	True;True	1709;4109	3866;3867;8837;8838
Q5JV98;B4DR80;Q9Y6E0	Q5JV98;B4DR80;Q9Y6E0	1;1;1	1;1;1	1;1;1	Serine/threonine-protein kinase 24;Serine/threonine-protein kinase 24 36 kDa subunit;Serine/threonine-protein kinase 24 12 kDa subunit	STK24	>tr|Q5JV98|Q5JV98_HUMAN Serine/threonine-protein kinase 24 (Fragment) OS=Homo sapiens GN=STK24 PE=1 SV=1;>tr|B4DR80|B4DR80_HUMAN Serine/threonine-protein kinase 24 OS=Homo sapiens GN=STK24 PE=1 SV=1;>sp|Q9Y6E0|STK24_HUMAN Serine/threonine-protein kinase 24	3	1	1	1	5.3	5.3	5.3	23.127	209	209;412;443	0.0040853	1.1175	NaN	NaN	NaN	0	0	Median	NaN	NaN	NaN	0	0	Median	NaN	NaN	NaN	0	0	Median	0	0	0	0				258	15372	TRUE	15916	35106
B4DUC8;Q13126;J3QSB7;F2Z2F3;F8WES2;J3KRN1	B4DUC8;Q13126;J3QSB7;F2Z2F3	7;7;5;4;2;1	7;7;5;4;2;1	7;7;5;4;2;1	S-methyl-5-thioadenosine phosphorylase;Purine nucleoside phosphorylase	MTAP	>tr|B4DUC8|B4DUC8_HUMAN S-methyl-5-thioadenosine phosphorylase OS=Homo sapiens GN=MTAP PE=1 SV=1;>sp|Q13126|MTAP_HUMAN S-methyl-5-thioadenosine phosphorylase OS=Homo sapiens GN=MTAP PE=1 SV=2;>tr|J3QSB7|J3QSB7_HUMAN Purine nucleoside phosphorylase OS=Hom	6	7	7	7	34	34	34	33.186	300	300;283;242;143;50;112	0	39.722	0.26093	1.0258	11.369	6	0	Median	0.95475	0.97832	3.5406	6	0	Median	3.7135	0.97707	14.818	6	0	Median	314980000	141020000	40186000	133770000				259	5848;5849;6055;10054;11640;13253;15418	True;True;True;True;True;True;True	5999;6000;6210;10414;12048;13715;15962	13078;13079;13080;13566;13567;22821;26169;26170;29793;29794;35202;35203;35204
B4DUR8;P49368;Q5SZX6;E9PQ35;E9PRC8;Q5SZW8;E9PM09;Q5SZX9	B4DUR8;P49368	18;18;6;5;5;3;2;1	18;18;6;5;5;3;2;1	18;18;6;5;5;3;2;1	T-complex protein 1 subunit gamma	CCT3	>tr|B4DUR8|B4DUR8_HUMAN T-complex protein 1 subunit gamma OS=Homo sapiens GN=CCT3 PE=1 SV=1;>sp|P49368|TCPG_HUMAN T-complex protein 1 subunit gamma OS=Homo sapiens GN=CCT3 PE=1 SV=4	8	18	18	18	43.4	43.4	43.4	55.674	500	500;545;276;144;234;188;154;161	0	68.823	0.25944	1.0019	20.736	22	0	Median	1.0126	1.0032	5.3973	22	0	Median	3.8088	1.005	19.264	22	0	Median	1213600000	529150000	160710000	523790000				260	251;875;876;1158;1665;2950;4594;5820;6303;6657;6683;6900;10018;10285;12354;12782;13569;14883	True;True;True;True;True;True;True;True;True;True;True;True;True;True;True;True;True;True	256;907;908;1202;1719;3040;4717;5970;6476;6845;6871;7096;10376;10656;12780;13225;14036;15409	487;488;489;2013;2014;2015;2706;3882;3883;3884;3885;6659;10124;10125;10126;12990;14123;14930;14931;14981;14982;14983;15413;15414;22719;22720;23270;23271;27709;27710;27711;27712;28693;28694;28695;28696;30567;33981;33982
B4DW73;H0YM31;Q16822;H0YMU6;H0YNG4;H0YMA5;A0A0A0MS74;H0YML5	B4DW73;H0YM31;Q16822;H0YMU6;H0YNG4;H0YMA5;A0A0A0MS74;H0YML5	2;2;2;1;1;1;1;1	2;2;2;1;1;1;1;1	2;2;2;1;1;1;1;1	Phosphoenolpyruvate carboxykinase [GTP], mitochondrial	PCK2	>tr|B4DW73|B4DW73_HUMAN Phosphoenolpyruvate carboxykinase [GTP], mitochondrial OS=Homo sapiens GN=PCK2 PE=1 SV=1;>tr|H0YM31|H0YM31_HUMAN Phosphoenolpyruvate carboxykinase [GTP], mitochondrial OS=Homo sapiens GN=PCK2 PE=1 SV=2;>sp|Q16822|PCKGM_HUMAN Phospho	8	2	2	2	5.5	5.5	5.5	55.952	506	506;509;640;107;113;122;441;474	0	4.9945	0.27035	1.0518	21.881	2	1	Median	1.1114	1.1011	17.559	2	1	Median	4.1477	1.0588	1.0529	2	1	Median	29582000	12022000	3706100	13854000				261	5154;7852	True;True	5289;8076	11392;17802
E5RHD8;E5RI03;B4DWJ1;E9PEI4;H0YB16;H0YBZ1;H0YBP1;E7ESA6;Q05397	E5RHD8;E5RI03;B4DWJ1;E9PEI4;H0YB16;H0YBZ1;H0YBP1;E7ESA6;Q05397	1;1;1;1;1;1;1;1;1	1;1;1;1;1;1;1;1;1	1;1;1;1;1;1;1;1;1	Focal adhesion kinase 1	PTK2	>tr|E5RHD8|E5RHD8_HUMAN Focal adhesion kinase 1 OS=Homo sapiens GN=PTK2 PE=1 SV=1;>tr|E5RI03|E5RI03_HUMAN Focal adhesion kinase 1 (Fragment) OS=Homo sapiens GN=PTK2 PE=1 SV=1;>tr|B4DWJ1|B4DWJ1_HUMAN Focal adhesion kinase 1 OS=Homo sapiens GN=PTK2 PE=1 SV=1	9	1	1	1	8.7	8.7	8.7	12.863	115	115;120;362;680;724;753;1017;1096;1052	0.00050865	2.0361	0.30571	1.1528	6.0508	2	2	Median	1.0447	0.98109	7.0289	2	2	Median	3.4172	0.87645	0.97814	2	2	Median	8562400	3777000	1340600	3444800				262	9995	TRUE	10351	22668;22669
B4DWR3;P61758	B4DWR3;P61758	5;5	5;5	5;5	Prefoldin subunit 3	VBP1	>tr|B4DWR3|B4DWR3_HUMAN Prefoldin subunit 3 OS=Homo sapiens GN=VBP1 PE=1 SV=1;>sp|P61758|PFD3_HUMAN Prefoldin subunit 3 OS=Homo sapiens GN=VBP1 PE=1 SV=3	2	5	5	5	21.9	21.9	21.9	22.254	192	192;197	0	5.282	0.27837	1.1343	3.5704	3	0	Median	1.0076	1.0264	5.3274	3	0	Median	3.7201	0.96211	3.079	3	0	Median	90094000	36659000	14636000	38799000				263	3810;3846;8040;10713;14784	True;True;True;True;True	3914;3950;8269;11096;15306	8480;8481;8536;18355;24104;33776
E7EU85;E9PFF5;B4DXZ6;P51114;R9WNI0;A8MQB8;G3V0J0;Q06787;P51116	E7EU85;E9PFF5;B4DXZ6;P51114;R9WNI0;A8MQB8;G3V0J0;Q06787;P51116	2;2;2;2;1;1;1;1;1	2;2;2;2;1;1;1;1;1	2;2;2;2;1;1;1;1;1	Fragile X mental retardation syndrome-related protein 1;Fragile X mental retardation protein 1;Fragile X mental retardation syndrome-related protein 2	FXR1;FMR1;FXR2	>tr|E7EU85|E7EU85_HUMAN Fragile X mental retardation syndrome-related protein 1 OS=Homo sapiens GN=FXR1 PE=1 SV=1;>tr|E9PFF5|E9PFF5_HUMAN Fragile X mental retardation syndrome-related protein 1 OS=Homo sapiens GN=FXR1 PE=1 SV=1;>tr|B4DXZ6|B4DXZ6_HUMAN Frag	9	2	2	2	4.8	4.8	4.8	50.99	454	454;490;608;621;544;582;592;632;673	0	3.349	0.29916	1.1941	20.556	4	3	Median	1.0458	1.0222	8.2728	4	3	Linear	3.2266	0.83043	13.091	4	3	Median	52758000	20736000	9814400	22208000				264	4408;8666	True;True	4526;8911	9712;9713;19784;19785
B4DY09;Q12905;X6R6Z1;A0A0A0MRL0	B4DY09;Q12905;X6R6Z1	13;13;7;6	13;13;7;6	13;13;7;6	Interleukin enhancer-binding factor 2	ILF2	>tr|B4DY09|B4DY09_HUMAN Interleukin enhancer-binding factor 2 OS=Homo sapiens GN=ILF2 PE=1 SV=1;>sp|Q12905|ILF2_HUMAN Interleukin enhancer-binding factor 2 OS=Homo sapiens GN=ILF2 PE=1 SV=2;>tr|X6R6Z1|X6R6Z1_HUMAN Interleukin enhancer-binding factor 2 (Fra	4	13	13	13	49.1	49.1	49.1	38.91	352	352;390;115;150	0	66.229	0.26064	0.92643	9.1687	16	0	Median	1.0068	1.0123	6.5237	16	0	Median	3.8417	1.0547	14.712	16	0	Median	1153600000	510550000	142300000	500770000				265	1308;5066;6145;6173;6271;6922;7011;10124;10653;13942;13943;14142;14822	True;True;True;True;True;True;True;True;True;True;True;True;True	1356;5198;6302;6333;6442;7118;7208;10488;11036;14430;14431;14638;15345	3005;3006;11195;11196;13770;13850;13851;14064;15447;15620;22972;22973;22974;23971;31638;31639;31640;31641;32152;33842
B5MBZ8;C9JD73;C9J177;H7C003;Q15435	B5MBZ8;C9JD73;C9J177;H7C003;Q15435	1;1;1;1;1	1;1;1;1;1	1;1;1;1;1	Protein phosphatase 1 regulatory subunit 7	PPP1R7	>tr|B5MBZ8|B5MBZ8_HUMAN Protein phosphatase 1 regulatory subunit 7 OS=Homo sapiens GN=PPP1R7 PE=1 SV=1;>tr|C9JD73|C9JD73_HUMAN Protein phosphatase 1 regulatory subunit 7 (Fragment) OS=Homo sapiens GN=PPP1R7 PE=1 SV=1;>tr|C9J177|C9J177_HUMAN Protein phospha	5	1	1	1	6.6	6.6	6.6	31.357	274	274;282;289;335;360	0	19.175	0.24966	0.91191	5.1771	2	2	Median	1.0301	1.0572	3.6651	2	2	Median	4.126	1.0064	1.5121	2	2	Median	20202000	8669700	2523400	9008700				266	715	TRUE	743	1641;1642
B5MC22;Q9UDX5;F8WEN7	B5MC22;Q9UDX5;F8WEN7	2;2;1	2;2;1	1;1;1	Mitochondrial fission process protein 1	MTFP1	>tr|B5MC22|B5MC22_HUMAN Mitochondrial fission process protein 1 OS=Homo sapiens GN=MTFP1 PE=1 SV=1;>sp|Q9UDX5|MTFP1_HUMAN Mitochondrial fission process protein 1 OS=Homo sapiens GN=MTFP1 PE=1 SV=1;>tr|F8WEN7|F8WEN7_HUMAN Mitochondrial fission process prote	3	2	2	1	16.8	16.8	9.1	15.556	143	143;166;74	0	8.8147	0.26993	1.0943	21.812	2	1	Median	1.0669	1.0868	14.171	2	1	Median	3.9452	1.028	7.3794	2	1	Median	15783000	6816900	2053300	6912800				267	12141;15195	True;True	12558;15726	27261;34686
E9PFD4;B5MCE7;Q75MG1;B5MCH7;E7ETZ4;Q9Y6E2	E9PFD4;B5MCE7;Q75MG1;B5MCH7;E7ETZ4;Q9Y6E2	2;2;2;2;2;2	2;2;2;2;2;2	2;2;2;2;2;2	Basic leucine zipper and W2 domain-containing protein 2	BZW2	>tr|E9PFD4|E9PFD4_HUMAN BZW2 protein OS=Homo sapiens GN=BZW2 PE=1 SV=2;>tr|B5MCE7|B5MCE7_HUMAN Basic leucine zipper and W2 domain-containing protein 2 OS=Homo sapiens GN=BZW2 PE=1 SV=1;>tr|Q75MG1|Q75MG1_HUMAN Basic leucine zipper and W2 domain-containing p	6	2	2	2	12.7	12.7	12.7	21.511	189	189;225;274;343;408;419	0	3.0743	0.28052	1.0923	2.9889	2	0	Median	1.1185	1.1444	3.7905	2	0	Median	4.2919	1.1346	10.757	2	0	Median	39172000	17301000	3834500	18036000				268	8171;15038	True;True	8401;15566	18669;34292
B5MCX3;Q15019;C9J2Q4;C9IY94;C9IZU3;C9JQJ4;C9J938;H7C310;C9JB25;H7C2Y0;B5MD47;C9JFT1;F8WB65;C9JZI2	B5MCX3;Q15019;C9J2Q4;C9IY94;C9IZU3;C9JQJ4;C9J938;H7C310;C9JB25;H7C2Y0	6;6;5;3;3;3;3;3;3;3;2;1;1;1	6;6;5;3;3;3;3;3;3;3;2;1;1;1	6;6;5;3;3;3;3;3;3;3;2;1;1;1	Septin-2	2002-09-01	>tr|B5MCX3|B5MCX3_HUMAN Septin-2 OS=Homo sapiens GN=SEPT2 PE=1 SV=1;>sp|Q15019|SEPT2_HUMAN Septin-2 OS=Homo sapiens GN=SEPT2 PE=1 SV=1;>tr|C9J2Q4|C9J2Q4_HUMAN Septin-2 (Fragment) OS=Homo sapiens GN=SEPT2 PE=1 SV=1;>tr|C9IY94|C9IY94_HUMAN Septin-2 (Fragment	14	6	6	6	25.2	25.2	25.2	36.94	321	321;361;184;121;131;147;148;161;173;188;94;72;80;105	0	48.254	0.25306	0.90492	16.527	9	0	Median	1.004	0.98401	4.0722	9	0	Median	3.9605	1.054	19.209	9	0	Median	477020000	199130000	65956000	211940000				269	1466;6091;9046;12089;12655;14240	True;True;True;True;True;True	1518;6248;9303;12504;13093;14745	3465;3466;13661;13662;20638;20639;27137;27138;28408;32390;32391
B5MD17;J3KS05;P83916;K7ELA4	B5MD17;J3KS05;P83916	3;3;3;1	2;2;2;0	2;2;2;0	Chromobox protein homolog 1	CBX1	>tr|B5MD17|B5MD17_HUMAN Chromobox protein homolog 1 (Fragment) OS=Homo sapiens GN=CBX1 PE=1 SV=1;>tr|J3KS05|J3KS05_HUMAN Chromobox protein homolog 1 (Fragment) OS=Homo sapiens GN=CBX1 PE=1 SV=5;>sp|P83916|CBX1_HUMAN Chromobox protein homolog 1 OS=Homo sapi	4	3	2	2	19	9.5	9.5	19.325	168	168;174;185;138	0	4.7854	0.26709	1.0453	15.682	2	1	Median	1.0208	1.0495	1.7863	2	1	Median	3.7835	1.0017	17.862	2	1	Median	20093000	9249300	2389400	8454600				270	5962;10176;10177	False;True;True	6113;10542;10543	13288;13289;23061;23062
B5MDF5;P62826;J3KQE5;F5H018;B4DV51;H0YFC6;A0A087X0W0	B5MDF5;P62826;J3KQE5;F5H018;B4DV51	13;13;12;11;7;5;1	13;13;12;11;7;5;1	13;13;12;11;7;5;1	GTP-binding nuclear protein Ran	RAN	>tr|B5MDF5|B5MDF5_HUMAN GTP-binding nuclear protein Ran OS=Homo sapiens GN=RAN PE=1 SV=1;>sp|P62826|RAN_HUMAN GTP-binding nuclear protein Ran OS=Homo sapiens GN=RAN PE=1 SV=3;>tr|J3KQE5|J3KQE5_HUMAN GTP-binding nuclear protein Ran (Fragment) OS=Homo sapien	7	13	13	13	46.4	46.4	46.4	26.224	233	233;216;234;199;128;103;53	0	70.896	0.24669	0.99315	15.364	28	0	Median	0.95801	0.97271	6.9102	28	0	Median	3.7497	0.96482	14.69	28	0	Median	3012200000	1343900000	355960000	1312300000				271	162;3881;4886;6996;7253;9146;10027;10294;11795;13435;13436;13437;15416	True;True;True;True;True;True;True;True;True;True;True;True;True	166;3986;5015;7193;7459;9406;10385;10665;12207;13900;13901;13902;15960	292;293;294;295;296;8600;8601;10826;10827;10828;10829;10830;10831;15583;15584;16242;20822;20823;20824;20825;22747;22748;22749;23294;26511;26512;26513;26514;26515;26516;26517;30251;30252;30253;30254;30255;30256;30257;30258;30259;30260;30261;35194;35195;35196;35197;35198
Q99613;B5ME19;H3BPE4;H3BTY8;H3BPE3	Q99613;B5ME19	8;8;2;1;1	8;8;2;1;1	8;8;2;1;1	Eukaryotic translation initiation factor 3 subunit C;Eukaryotic translation initiation factor 3 subunit C-like protein	EIF3C;EIF3CL	>sp|Q99613|EIF3C_HUMAN Eukaryotic translation initiation factor 3 subunit C OS=Homo sapiens GN=EIF3C PE=1 SV=1;>sp|B5ME19|EIFCL_HUMAN Eukaryotic translation initiation factor 3 subunit C-like protein OS=Homo sapiens GN=EIF3CL PE=3 SV=1	5	8	8	8	9.2	9.2	9.2	105.34	913	913;914;148;80;133	0	10.662	0.24144	0.97135	22.728	5	0	Median	1.0111	1.0134	6.3491	5	0	Median	4.1043	1.035	19.444	5	0	Median	102280000	43539000	14336000	44401000				272	810;3589;4252;5043;7841;11494;12366;14754	True;True;True;True;True;True;True;True	841;3686;4366;5175;8065;11902;12792;15276	1867;1868;7977;7978;9356;9357;11159;17783;17784;17785;25771;27731;33724
F5H7S3;H7BYY1;H0YK48;B7Z596;H0YN06	F5H7S3;H7BYY1;H0YK48;B7Z596	7;7;7;7;1	1;1;1;1;1	1;1;1;1;1		TPM1	>tr|F5H7S3|F5H7S3_HUMAN Tropomyosin alpha-1 chain OS=Homo sapiens GN=TPM1 PE=1 SV=2;>tr|H7BYY1|H7BYY1_HUMAN Tropomyosin 1 (Alpha), isoform CRA_m OS=Homo sapiens GN=TPM1 PE=1 SV=1;>tr|H0YK48|H0YK48_HUMAN Tropomyosin alpha-1 chain OS=Homo sapiens GN=TPM1 PE=	5	7	1	1	19.2	4.9	4.9	28.524	245	245;248;248;275;49	0	2.2229	NaN	NaN	NaN	1	0	Median	NaN	NaN	NaN	1	0	Median	NaN	NaN	NaN	1	0	Median	13201000	5845800	1601100	5754100				273	6376;6377;7425;7426;7569;10891;11677	False;False;False;False;False;False;True	6550;6551;7639;7640;7789;11275;12085	14275;14276;14277;14278;14279;16683;16684;16685;17096;17097;17098;24501;24502;26243
B7Z645;O60506;F6UXX1	B7Z645;O60506	6;6;2	2;2;1	2;2;1	Heterogeneous nuclear ribonucleoprotein Q	SYNCRIP	>tr|B7Z645|B7Z645_HUMAN Heterogeneous nuclear ribonucleoprotein Q OS=Homo sapiens GN=SYNCRIP PE=1 SV=1;>sp|O60506|HNRPQ_HUMAN Heterogeneous nuclear ribonucleoprotein Q OS=Homo sapiens GN=SYNCRIP PE=1 SV=2	3	6	2	2	14	5.6	5.6	52.046	464	464;623;185	0	2.4769	0.32722	1.3079	110.9	4	2	Median	1.0505	0.98373	59.677	4	2	Median	2.9673	0.73126	54.227	4	2	Median	131590000	28464000	49852000	53277000				274	623;2320;4367;7701;9943;12585	False;True;False;False;True;False	647;2389;4482;7923;10297;13020	1415;1416;1417;5280;5281;5282;9600;17409;22542;28233;28234
B7Z6D5;Q96GQ7;A0A087X059	B7Z6D5;Q96GQ7;A0A087X059	10;10;6	10;10;6	10;10;6	Probable ATP-dependent RNA helicase DDX27	DDX27	>tr|B7Z6D5|B7Z6D5_HUMAN Probable ATP-dependent RNA helicase DDX27 OS=Homo sapiens GN=DDX27 PE=1 SV=1;>sp|Q96GQ7|DDX27_HUMAN Probable ATP-dependent RNA helicase DDX27 OS=Homo sapiens GN=DDX27 PE=1 SV=2;>tr|A0A087X059|A0A087X059_HUMAN Probable ATP-dependent	3	10	10	10	14	14	14	86.604	765	765;796;275	0	25.507	0.26329	1.0393	9.1577	8	0	Median	0.94682	0.91474	5.1722	8	0	Median	3.589	0.92625	8.9914	8	0	Median	134360000	56227000	27536000	50601000				275	146;241;1050;2181;3055;4633;4671;5809;12280;14191	True;True;True;True;True;True;True;True;True;True	150;246;1087;2250;3147;4758;4797;5958;12703;14688	266;471;2457;5020;6868;10231;10232;10325;12947;27558;32252
K7EN31;B7Z7F3;Q9H6Z4	K7EN31;B7Z7F3;Q9H6Z4	1;1;1	1;1;1	1;1;1	Ran-binding protein 3	RANBP3	>tr|K7EN31|K7EN31_HUMAN Ran-binding protein 3 (Fragment) OS=Homo sapiens GN=RANBP3 PE=1 SV=5;>tr|B7Z7F3|B7Z7F3_HUMAN Ran-binding protein 3 OS=Homo sapiens GN=RANBP3 PE=1 SV=1;>sp|Q9H6Z4|RANB3_HUMAN Ran-binding protein 3 OS=Homo sapiens GN=RANBP3 PE=1 SV=1	3	1	1	1	8.1	8.1	8.1	18.282	172	172;494;567	0.00049925	1.9021	NaN	NaN	NaN	1	0	Median	NaN	NaN	NaN	1	0	Median	NaN	NaN	NaN	1	0	Median	24002000	10928000	2594700	10479000				276	12186	TRUE	12606	27366
R4GNH5;B7Z7U4	R4GNH5;B7Z7U4	1;1	1;1	1;1	Tyrosine-protein kinase receptor	NTRK3	>tr|R4GNH5|R4GNH5_HUMAN NT-3 growth factor receptor (Fragment) OS=Homo sapiens GN=NTRK3 PE=1 SV=1;>tr|B7Z7U4|B7Z7U4_HUMAN Tyrosine-protein kinase receptor OS=Homo sapiens GN=NTRK3 PE=1 SV=1	2	1	1	1	8.9	8.9	8.9	10.709	90	90;617	0.0070734	0.9545	NaN	NaN	NaN	1	1	Median	NaN	NaN	NaN	1	1	Median	NaN	NaN	NaN	1	1	Median	18975000	17114000	814230	1046400				277	3164	TRUE	3257	7071
H0YHC3;F8W020;F8W118;F8VXI6;F8VUX1;F8VY35;F8VV59;B7Z9C2;F8W0J6;F5H4R6;H0YIV4;P55209;H0YH88;F8W543;F8VRJ2	H0YHC3;F8W020;F8W118;F8VXI6;F8VUX1;F8VY35;F8VV59;B7Z9C2;F8W0J6;F5H4R6;H0YIV4;P55209;H0YH88;F8W543	3;3;3;3;3;3;3;3;3;3;3;3;2;2;1	3;3;3;3;3;3;3;3;3;3;3;3;2;2;1	3;3;3;3;3;3;3;3;3;3;3;3;2;2;1	Nucleosome assembly protein 1-like 1	NAP1L1	>tr|H0YHC3|H0YHC3_HUMAN Nucleosome assembly protein 1-like 1 (Fragment) OS=Homo sapiens GN=NAP1L1 PE=1 SV=1;>tr|F8W020|F8W020_HUMAN Nucleosome assembly protein 1-like 1 (Fragment) OS=Homo sapiens GN=NAP1L1 PE=1 SV=1;>tr|F8W118|F8W118_HUMAN Nucleosome assem	15	3	3	3	23.2	23.2	23.2	23.417	198	198;207;209;215;237;264;327;349;379;383;385;391;177;328;114	0	7.8669	0.22533	0.85963	16.366	4	0	Median	0.97993	0.9779	4.8664	4	0	Median	4.0641	1.0105	9.7971	4	0	Median	106770000	50267000	11971000	44528000				278	4587;7505;10254	True;True;True	4710;7722;10624	10108;10109;10110;10111;10112;10113;10114;10115;10116;16928;23212
B7Z9I1;Q5T4U5;P11310;H0YDT5	B7Z9I1;Q5T4U5;P11310	3;3;3;1	3;3;3;1	3;3;3;1	Medium-chain specific acyl-CoA dehydrogenase, mitochondrial	ACADM	>tr|B7Z9I1|B7Z9I1_HUMAN Medium-chain-specific acyl-CoA dehydrogenase, mitochondrial OS=Homo sapiens GN=ACADM PE=1 SV=1;>tr|Q5T4U5|Q5T4U5_HUMAN Acyl-Coenzyme A dehydrogenase, C-4 to C-12 straight chain, isoform CRA_a OS=Homo sapiens GN=ACADM PE=1 SV=1;>sp|P	4	3	3	3	9.1	9.1	9.1	42.426	385	385;454;421;67	0	5.0872	0.21883	0.81003	17.779	3	0	Median	1.1281	1.1401	1.4568	3	0	Median	5.7524	1.5839	22.945	3	0	Median	96125000	40483000	10450000	45192000				279	1210;4614;13026	True;True;True	1257;4739;13480	2795;2796;10185;10186;29293;29294
B8ZZ77;H7BZ14;Q9H2H8	B8ZZ77;H7BZ14;Q9H2H8	2;2;2	2;2;2	2;2;2	Peptidyl-prolyl cis-trans isomerase;Peptidyl-prolyl cis-trans isomerase-like 3	PPIL3	>tr|B8ZZ77|B8ZZ77_HUMAN Peptidyl-prolyl cis-trans isomerase-like 3 OS=Homo sapiens GN=PPIL3 PE=1 SV=1;>tr|H7BZ14|H7BZ14_HUMAN Peptidyl-prolyl cis-trans isomerase (Fragment) OS=Homo sapiens GN=PPIL3 PE=1 SV=1;>sp|Q9H2H8|PPIL3_HUMAN Peptidyl-prolyl cis-trans	3	2	2	2	19.1	19.1	19.1	17.696	157	157;180;161	0	2.1077	NaN	NaN	NaN	1	1	Median	NaN	NaN	NaN	1	1	Median	NaN	NaN	NaN	1	1	Median	13138000	6401200	1095900	5641100				280	2237;13818	True;True	2306;14294	5111;31235
H7BZ50;H7C173;H7C202;B8ZZ87;Q6P582;Q6NZ67	H7BZ50;H7C173;H7C202;B8ZZ87;Q6P582;Q6NZ67	1;1;1;1;1;1	1;1;1;1;1;1	1;1;1;1;1;1	Mitotic-spindle organizing protein 2A;Mitotic-spindle organizing protein 2B	MZT2B;MZT2A	>tr|H7BZ50|H7BZ50_HUMAN Mitotic-spindle organizing protein 2B (Fragment) OS=Homo sapiens GN=MZT2B PE=1 SV=1;>tr|H7C173|H7C173_HUMAN Mitotic-spindle organizing protein 2B (Fragment) OS=Homo sapiens GN=MZT2B PE=1 SV=1;>tr|H7C202|H7C202_HUMAN Mitotic-spindle	6	1	1	1	10.7	10.7	10.7	12.386	121	121;122;140;218;158;158	0	3.4504	NaN	NaN	NaN	1	0	Median	NaN	NaN	NaN	1	0	Median	NaN	NaN	NaN	1	0	Median	2467900	1090600	220930	1156400				281	8488	TRUE	8730	19416
B8ZZF8;Q9Y4Y9	B8ZZF8;Q9Y4Y9	1;1	1;1	1;1	U6 snRNA-associated Sm-like protein LSm5	LSM5	>tr|B8ZZF8|B8ZZF8_HUMAN U6 snRNA-associated Sm-like protein LSm5 OS=Homo sapiens GN=LSM5 PE=1 SV=1;>sp|Q9Y4Y9|LSM5_HUMAN U6 snRNA-associated Sm-like protein LSm5 OS=Homo sapiens GN=LSM5 PE=1 SV=3	2	1	1	1	29.7	29.7	29.7	7.0202	64	64;91	0	13.575	0.27539	1.1455	1.7307	2	2	Median	1.017	1.0083	0.12265	2	2	Median	3.6931	0.87918	1.6081	2	2	Median	14463000	6394800	1692100	6375600				282	137	TRUE	141	248;249
B8ZZQ6;P06454;B8ZZA1;B8ZZW7;H7C2N1;A0A087WUT1	B8ZZQ6;P06454;B8ZZA1;B8ZZW7;H7C2N1	3;3;2;2;2;1	3;3;2;2;2;1	3;3;2;2;2;1	Prothymosin alpha;Prothymosin alpha, N-terminally processed;Thymosin alpha-1	PTMA	>tr|B8ZZQ6|B8ZZQ6_HUMAN Prothymosin alpha OS=Homo sapiens GN=PTMA PE=1 SV=1;>sp|P06454|PTMA_HUMAN Prothymosin alpha OS=Homo sapiens GN=PTMA PE=1 SV=2;>tr|B8ZZA1|B8ZZA1_HUMAN Prothymosin alpha OS=Homo sapiens GN=PTMA PE=1 SV=1;>tr|B8ZZW7|B8ZZW7_HUMAN Prothy	6	3	3	3	34.6	34.6	34.6	11.758	107	107;111;131;136;148;135	0	24.079	0.2415	1.0038	12.376	5	0	Median	1.1079	1.151	4.8883	5	0	Median	4.6608	1.149	9.0304	5	0	Median	164000000	68937000	18110000	76949000				283	54;3442;11129	True;True;True	56;3539;11524	88;7649;7650;25009;25010
H7C400;B8ZZZ0;Q6NVY1	H7C400;B8ZZZ0;Q6NVY1	1;1;1	1;1;1	1;1;1	3-hydroxyisobutyryl-CoA hydrolase, mitochondrial	HIBCH	>tr|H7C400|H7C400_HUMAN 3-hydroxyisobutyryl-CoA hydrolase, mitochondrial (Fragment) OS=Homo sapiens GN=HIBCH PE=1 SV=1;>tr|B8ZZZ0|B8ZZZ0_HUMAN 3-hydroxyisobutyryl-CoA hydrolase, mitochondrial (Fragment) OS=Homo sapiens GN=HIBCH PE=1 SV=1;>sp|Q6NVY1|HIBCH_H	3	1	1	1	21.2	21.2	21.2	5.7074	52	52;273;386	0.0023496	1.3183	NaN	NaN	NaN	1	1	Median	NaN	NaN	NaN	1	1	Median	NaN	NaN	NaN	1	1	Median	3296800	1121400	882450	1293000				284	7868	TRUE	8092	17838
B9A051;Q96EL3	B9A051;Q96EL3	1;1	1;1	1;1	39S ribosomal protein L53, mitochondrial	MRPL53	>tr|B9A051|B9A051_HUMAN 39S ribosomal protein L53, mitochondrial OS=Homo sapiens GN=MRPL53 PE=1 SV=1;>sp|Q96EL3|RM53_HUMAN 39S ribosomal protein L53, mitochondrial OS=Homo sapiens GN=MRPL53 PE=1 SV=1	2	1	1	1	11.4	11.4	11.4	7.8158	70	70;112	0.0066726	0.9953	NaN	NaN	NaN	1	0	Median	NaN	NaN	NaN	1	0	Median	NaN	NaN	NaN	1	0	Median	9584900	4292200	773880	4518800				285	14368	TRUE	14875	32738
B9A067;Q16891;C9J406;H7C463;A0A087WYS0;D6RAW4	B9A067;Q16891;C9J406;H7C463	24;24;22;20;8;2	24;24;22;20;8;2	24;24;22;20;8;2	MICOS complex subunit MIC60	IMMT	>tr|B9A067|B9A067_HUMAN MICOS complex subunit MIC60 OS=Homo sapiens GN=IMMT PE=1 SV=2;>sp|Q16891|MIC60_HUMAN MICOS complex subunit MIC60 OS=Homo sapiens GN=IMMT PE=1 SV=1;>tr|C9J406|C9J406_HUMAN MICOS complex subunit MIC60 OS=Homo sapiens GN=IMMT PE=1 SV=1	6	24	24	24	44.7	44.7	44.7	78.973	711	711;758;659;613;372;147	0	133.45	0.29832	1.1607	10.261	33	0	Median	0.97016	0.9382	6.4435	33	0	Median	3.1085	0.82595	6.9776	33	0	Median	483560000	212340000	70125000	201090000				286	134;1678;3033;3259;3359;4087;4559;4817;5185;6771;6803;7400;7886;8758;8826;8889;10501;10705;11567;12675;13070;13377;14722;15384	True;True;True;True;True;True;True;True;True;True;True;True;True;True;True;True;True;True;True;True;True;True;True;True	137;138;1733;3124;3353;3454;4197;4682;4944;5320;6961;6994;7614;8111;9006;9075;9139;10882;11088;11975;13115;13524;13841;15242;15928	242;243;3923;3924;6825;6826;7231;7232;7487;7488;8987;10045;10046;10667;11470;11471;15146;15211;15212;16621;16622;16623;17890;19990;20118;20271;23693;24094;25963;28449;29382;29383;30088;33657;33658;33659;35133;35134
C4P0D6;C4P0D8;Q99598;C4P0D4;Q5VVQ1	C4P0D6;C4P0D8;Q99598;C4P0D4;Q5VVQ1	3;3;3;2;2	3;3;3;2;2	3;3;3;2;2	Translin-associated protein X	DISC1;TSNAX	>tr|C4P0D6|C4P0D6_HUMAN Disrupted in schizophrenia 1 isoform 49 OS=Homo sapiens GN=DISC1 PE=2 SV=1;>tr|C4P0D8|C4P0D8_HUMAN Disrupted in schizophrenia 1 isoform 51 OS=Homo sapiens GN=DISC1 PE=2 SV=1;>sp|Q99598|TSNAX_HUMAN Translin-associated protein X OS=Ho	5	3	3	3	27.4	27.4	27.4	21.427	186	186;188;290;138;163	0	3.4195	0.27328	1.1382	13.264	4	2	Median	0.97072	0.9729	15.355	4	2	Median	3.2736	0.79878	15.448	4	2	Median	70373000	32306000	9030500	29036000				287	790;6580;11289	True;True;True	821;6768;11689	1828;1829;14769;25314
F8WAU4;C9IZ01;Q96RP9	F8WAU4;C9IZ01;Q96RP9	2;2;2	2;2;2	2;2;2	Elongation factor G, mitochondrial	GFM1	>tr|F8WAU4|F8WAU4_HUMAN Elongation factor G, mitochondrial OS=Homo sapiens GN=GFM1 PE=1 SV=1;>tr|C9IZ01|C9IZ01_HUMAN Elongation factor G, mitochondrial OS=Homo sapiens GN=GFM1 PE=1 SV=1;>sp|Q96RP9|EFGM_HUMAN Elongation factor G, mitochondrial OS=Homo sapie	3	2	2	2	4.6	4.6	4.6	50.911	453	453;591;751	0	2.7439	0.28417	1.1321	16.762	2	1	Median	1.1034	1.091	2.7362	2	1	Median	3.7162	0.93571	25.711	2	1	Median	14100000	6015100	1794400	6290400				288	805;3695	True;True	836;3793	1854;8162
C9JV57;C9J188;C9JWF5;C9JFN4;C9IZ80;Q7L1Q6	C9JV57;C9J188;C9JWF5;C9JFN4;C9IZ80;Q7L1Q6	1;1;1;1;1;1	1;1;1;1;1;1	1;1;1;1;1;1	Basic leucine zipper and W2 domain-containing protein 1	BZW1	>tr|C9JV57|C9JV57_HUMAN Basic leucine zipper and W2 domain-containing protein 1 (Fragment) OS=Homo sapiens GN=BZW1 PE=1 SV=1;>tr|C9J188|C9J188_HUMAN Basic leucine zipper and W2 domain-containing protein 1 (Fragment) OS=Homo sapiens GN=BZW1 PE=1 SV=5;>tr|C9	6	1	1	1	22.4	22.4	22.4	13.025	116	116;155;162;216;294;419	0	3.5805	0.28608	1.0449	4.8701	3	3	Median	1.0261	1.0531	10.043	3	3	Plateau	3.5819	0.87487	1.0794	3	3	Plateau	42699000	20638000	4074700	17987000				289	3572	TRUE	3669	7944;7945;7946
I3L4P6;C9IZD3;Q68EM7	I3L4P6;C9IZD3;Q68EM7	1;1;1	1;1;1	1;1;1	Rho GTPase-activating protein 17	ARHGAP17	>tr|I3L4P6|I3L4P6_HUMAN Rho GTPase-activating protein 17 (Fragment) OS=Homo sapiens GN=ARHGAP17 PE=1 SV=1;>tr|C9IZD3|C9IZD3_HUMAN Rho GTPase-activating protein 17 (Fragment) OS=Homo sapiens GN=ARHGAP17 PE=1 SV=3;>sp|Q68EM7|RHG17_HUMAN Rho GTPase-activating	3	1	1	1	11.8	11.8	11.8	8.6247	76	76;211;881	0.0031905	1.1492	NaN	NaN	NaN	1	0	Median	NaN	NaN	NaN	1	0	Median	NaN	NaN	NaN	1	0	Median	2716500	1117500	321840	1277100				290	9137	TRUE	9397	20803
C9IZG4;O60888;C9IZQ5	C9IZG4;O60888;C9IZQ5	2;2;1	2;2;1	2;2;1	Protein CutA	CUTA	>tr|C9IZG4|C9IZG4_HUMAN Protein CutA OS=Homo sapiens GN=CUTA PE=1 SV=1;>sp|O60888|CUTA_HUMAN Protein CutA OS=Homo sapiens GN=CUTA PE=1 SV=2;>tr|C9IZQ5|C9IZQ5_HUMAN Protein CutA OS=Homo sapiens GN=CUTA PE=1 SV=1	3	2	2	2	23.7	23.7	23.7	14.401	135	135;179;155	0	9.1215	0.31161	1.2944	9.2788	2	1	Median	1.0058	1.0287	1.5598	2	1	Median	3.2634	0.79955	6.4227	2	1	Median	61964000	25422000	8870400	27671000				291	7257;13010	True;True	7463;13464	16253;29252
C9J3L8;C9J5W0;E9PAL7;C9IZQ1;P43307	C9J3L8;C9J5W0;E9PAL7;C9IZQ1;P43307	3;3;3;3;3	3;3;3;3;3	3;3;3;3;3	Translocon-associated protein subunit alpha	SSR1	>tr|C9J3L8|C9J3L8_HUMAN Translocon-associated protein subunit alpha OS=Homo sapiens GN=SSR1 PE=1 SV=1;>tr|C9J5W0|C9J5W0_HUMAN Translocon-associated protein subunit alpha OS=Homo sapiens GN=SSR1 PE=1 SV=1;>tr|E9PAL7|E9PAL7_HUMAN Translocon-associated protei	5	3	3	3	12.8	12.8	12.8	29.573	265	265;266;291;298;286	0	11.487	0.29559	1.2191	8.6064	3	0	Median	1.0123	0.99229	7.2824	3	0	Median	3.3363	0.81592	6.0006	3	0	Median	174290000	75941000	24902000	73452000				292	3840;4327;5039	True;True;True	3944;4442;5171	8528;9513;11153;11154;11155
F8WBT4;C9J9T0;C9IZU8;Q96AT9	F8WBT4;C9J9T0;C9IZU8;Q96AT9	1;1;1;1	1;1;1;1	1;1;1;1	Ribulose-phosphate 3-epimerase	RPE	>tr|F8WBT4|F8WBT4_HUMAN Ribulose-phosphate 3-epimerase OS=Homo sapiens GN=RPE PE=1 SV=1;>tr|C9J9T0|C9J9T0_HUMAN Ribulose-5-phosphate-3-epimerase, isoform CRA_a OS=Homo sapiens GN=RPE PE=1 SV=1;>tr|C9IZU8|C9IZU8_HUMAN Ribulose-phosphate 3-epimerase OS=Homo	4	1	1	1	31.7	31.7	31.7	6.3293	60	60;191;225;228	0	18.204	NaN	NaN	NaN	1	0	Median	NaN	NaN	NaN	1	0	Median	NaN	NaN	NaN	1	0	Median	11059000	4987800	1118100	4952900				293	5875	TRUE	6026	13122
C9IZW8;C9JXM4;H7C5B8;O95178	C9IZW8;C9JXM4;H7C5B8;O95178	1;1;1;1	1;1;1;1	1;1;1;1	NADH dehydrogenase [ubiquinone] 1 beta subcomplex subunit 2, mitochondrial	NDUFB2	>tr|C9IZW8|C9IZW8_HUMAN NADH dehydrogenase [ubiquinone] 1 beta subcomplex subunit 2, mitochondrial OS=Homo sapiens GN=NDUFB2 PE=1 SV=1;>tr|C9JXM4|C9JXM4_HUMAN NADH dehydrogenase [ubiquinone] 1 beta subcomplex subunit 2, mitochondrial OS=Homo sapiens GN=NDU	4	1	1	1	11.5	11.5	11.5	9.3942	78	78;93;104;105	0.0044964	1.0495	NaN	NaN	NaN	1	0	Median	NaN	NaN	NaN	1	0	Median	NaN	NaN	NaN	1	0	Median	6621700	2781500	761020	3079200				294	15343	TRUE	15886	35060
C9J0J7;G5E9Q6;C9J712;C9JQ45;P35080;C9J2N0	C9J0J7;G5E9Q6;C9J712;C9JQ45;P35080	5;5;3;3;3;1	5;5;3;3;3;1	5;5;3;3;3;1	Profilin;Profilin-2	PFN2	>tr|C9J0J7|C9J0J7_HUMAN Profilin-2 OS=Homo sapiens GN=PFN2 PE=1 SV=1;>tr|G5E9Q6|G5E9Q6_HUMAN Profilin OS=Homo sapiens GN=PFN2 PE=1 SV=1;>tr|C9J712|C9J712_HUMAN Profilin-2 OS=Homo sapiens GN=PFN2 PE=1 SV=1;>tr|C9JQ45|C9JQ45_HUMAN Profilin OS=Homo sapiens GN	6	5	5	5	52.7	52.7	52.7	9.8402	91	91;188;91;110;140;125	0	22.835	0.20354	0.91649	13.49	8	0	Median	0.99164	1.0021	3.9818	8	0	Median	4.7964	1.1117	15.527	8	0	Median	186420000	82654000	19192000	84575000				295	1114;1849;2482;11903;12724	True;True;True;True;True	1153;1154;1906;2560;12317;13164	2591;2592;4282;4283;5620;26753;26754;28571;28572;28573
C9J0K6;P30626;B4DHQ6	C9J0K6;P30626	6;6;2	6;6;2	6;6;2	Sorcin	SRI	>tr|C9J0K6|C9J0K6_HUMAN Sorcin OS=Homo sapiens GN=SRI PE=1 SV=1;>sp|P30626|SORCN_HUMAN Sorcin OS=Homo sapiens GN=SRI PE=1 SV=1	3	6	6	6	43.2	43.2	43.2	17.605	155	155;198;158	0	10.117	0.23232	0.97	8.9208	3	0	Median	1.0821	1.1171	9.3088	3	0	Median	4.326	1.0685	5.1708	3	0	Median	42853000	18535000	4763100	19554000				296	2532;6545;8885;8886;10499;11378	True;True;True;True;True;True	2611;6730;9135;9136;10880;11784	5748;14700;14701;20266;20267;23691;25509
F8WBU5;C9J391;C9J1C6;H7C426;Q9P0P0	F8WBU5;C9J391;C9J1C6;H7C426;Q9P0P0	1;1;1;1;1	1;1;1;1;1	1;1;1;1;1	E3 ubiquitin-protein ligase RNF181	RNF181	>tr|F8WBU5|F8WBU5_HUMAN E3 ubiquitin-protein ligase RNF181 OS=Homo sapiens GN=RNF181 PE=1 SV=1;>tr|C9J391|C9J391_HUMAN E3 ubiquitin-protein ligase RNF181 (Fragment) OS=Homo sapiens GN=RNF181 PE=1 SV=1;>tr|C9J1C6|C9J1C6_HUMAN E3 ubiquitin-protein ligase RNF	5	1	1	1	10.3	10.3	10.3	8.7797	78	78;103;139;170;153	0.0070891	0.96279	NaN	NaN	NaN	1	1	Median	NaN	NaN	NaN	1	1	Median	NaN	NaN	NaN	1	1	Median	4443600	1851900	382060	2209700				297	13242	TRUE	13704	29779
C9J1Z8;P84085	C9J1Z8;P84085	4;4	1;1	1;1	ADP-ribosylation factor 5	ARF5	>tr|C9J1Z8|C9J1Z8_HUMAN ADP-ribosylation factor 5 (Fragment) OS=Homo sapiens GN=ARF5 PE=1 SV=1;>sp|P84085|ARF5_HUMAN ADP-ribosylation factor 5 OS=Homo sapiens GN=ARF5 PE=1 SV=2	2	4	1	1	34.7	6.7	6.7	17.107	150	150;180	0	9.2875	NaN	NaN	NaN	1	0	Median	NaN	NaN	NaN	1	0	Median	NaN	NaN	NaN	1	0	Median	40915000	16893000	4415800	19606000				298	2048;6165;7741;14365	False;False;False;True	2113;6324;6325;7963;14872	4743;13826;13827;13828;17553;17554;32734
C9J4M6;C9J2Y9;P30876	C9J4M6;C9J2Y9;P30876	4;4;4	4;4;4	4;4;4	DNA-directed RNA polymerase;DNA-directed RNA polymerase II subunit RPB2	POLR2B	>tr|C9J4M6|C9J4M6_HUMAN DNA-directed RNA polymerase OS=Homo sapiens GN=POLR2B PE=1 SV=2;>tr|C9J2Y9|C9J2Y9_HUMAN DNA-directed RNA polymerase OS=Homo sapiens GN=POLR2B PE=1 SV=2;>sp|P30876|RPB2_HUMAN DNA-directed RNA polymerase II subunit RPB2 OS=Homo sapien	3	4	4	4	3.5	3.5	3.5	125.19	1099	1099;1167;1174	0	7.9358	0.30777	1.224	41.528	5	3	Median	1.0852	1.0001	11.604	5	3	Median	4.4696	1.0033	44.516	5	3	Median	30741000	10922000	6499600	13320000				299	4888;5034;6498;10464	True;True;True;True	5017;5166;6682;10843	10833;10834;11142;14608;23615
C9JE55;C9J415;C9JFF4;O95352	C9JE55;C9J415;C9JFF4;O95352	1;1;1;1	1;1;1;1	1;1;1;1	Ubiquitin-like modifier-activating enzyme ATG7	ATG7	>tr|C9JE55|C9JE55_HUMAN Ubiquitin-like modifier-activating enzyme ATG7 (Fragment) OS=Homo sapiens GN=ATG7 PE=1 SV=1;>tr|C9J415|C9J415_HUMAN Ubiquitin-like modifier-activating enzyme ATG7 (Fragment) OS=Homo sapiens GN=ATG7 PE=1 SV=1;>tr|C9JFF4|C9JFF4_HUMAN	4	1	1	1	11.9	11.9	11.9	13.766	126	126;152;176;703	0.00098425	1.7511	NaN	NaN	NaN	1	0	Median	NaN	NaN	NaN	1	0	Median	NaN	NaN	NaN	1	0	Median	5572500	2362000	805960	2404500				300	8252	TRUE	8482	18869
C9J4Z3;P61513;G5E9R3;M0R0A1;Q6P4E4;E9PEL3;M0R2L6;A6NKH3	C9J4Z3;P61513;G5E9R3;M0R0A1;Q6P4E4;E9PEL3;M0R2L6;A6NKH3	2;2;1;1;1;1;1;1	2;2;1;1;1;1;1;1	2;2;1;1;1;1;1;1	60S ribosomal protein L37a;Putative 60S ribosomal protein L37a-like protein	RPL37A;RPL37AP8	>tr|C9J4Z3|C9J4Z3_HUMAN 60S ribosomal protein L37a OS=Homo sapiens GN=RPL37A PE=1 SV=1;>sp|P61513|RL37A_HUMAN 60S ribosomal protein L37a OS=Homo sapiens GN=RPL37A PE=1 SV=2;>tr|G5E9R3|G5E9R3_HUMAN 60S ribosomal protein L37a OS=Homo sapiens GN=RPL37A PE=1 S	8	2	2	2	38.2	38.2	38.2	7.624	68	68;92;58;60;72;75;88;93	0	19.573	0.25208	1.1275	7.1479	3	0	Median	0.96642	0.95252	1.8616	3	0	Median	3.8734	0.8663	5.8209	3	0	Median	35688000	15549000	4421100	15718000				301	13143;15392	True;True	13600;15936	29537;35146;35147
C9J5E3;C9JNS9;C9JL73;P21281;P15313	C9J5E3;C9JNS9;C9JL73;P21281;P15313	1;1;1;1;1	1;1;1;1;1	1;1;1;1;1	V-type proton ATPase subunit B, brain isoform;V-type proton ATPase subunit B, kidney isoform	ATP6V1B1;ATP6V1B2	>tr|C9J5E3|C9J5E3_HUMAN V-type proton ATPase subunit B, kidney isoform OS=Homo sapiens GN=ATP6V1B1 PE=1 SV=1;>tr|C9JNS9|C9JNS9_HUMAN V-type proton ATPase subunit B, kidney isoform (Fragment) OS=Homo sapiens GN=ATP6V1B1 PE=1 SV=1;>tr|C9JL73|C9JL73_HUMAN V-t	5	1	1	1	8.1	8.1	8.1	26.915	248	248;249;496;511;513	0	3.4025	NaN	NaN	NaN	1	0	Median	NaN	NaN	NaN	1	0	Median	NaN	NaN	NaN	1	0	Median	36300000	15085000	4072100	17143000				302	6308	TRUE	6481	14129
F8WEX5;E9PG02;E9PBT8;C9JL30;J3KQJ1;C9J660;F8WA42;Q8NBJ7	F8WEX5;E9PG02;E9PBT8;C9JL30;J3KQJ1;C9J660;F8WA42;Q8NBJ7	1;1;1;1;1;1;1;1	1;1;1;1;1;1;1;1	1;1;1;1;1;1;1;1	Sulfatase-modifying factor 2	SUMF2	>tr|F8WEX5|F8WEX5_HUMAN Sulfatase-modifying factor 2 OS=Homo sapiens GN=SUMF2 PE=1 SV=1;>tr|E9PG02|E9PG02_HUMAN Sulfatase-modifying factor 2 OS=Homo sapiens GN=SUMF2 PE=1 SV=1;>tr|E9PBT8|E9PBT8_HUMAN Sulfatase-modifying factor 2 OS=Homo sapiens GN=SUMF2 PE	8	1	1	1	6.1	6.1	6.1	18.584	165	165;183;232;294;320;352;358;301	0.0040614	1.0746	NaN	NaN	NaN	1	1	Median	NaN	NaN	NaN	1	1	Median	NaN	NaN	NaN	1	1	Median	8055800	2695500	648850	4711400				303	12189	TRUE	12609	27370
C9J6P4;Q7Z2W4	C9J6P4;Q7Z2W4	2;2	2;2	2;2	Zinc finger CCCH-type antiviral protein 1	ZC3HAV1	>tr|C9J6P4|C9J6P4_HUMAN Zinc finger CCCH-type antiviral protein 1 OS=Homo sapiens GN=ZC3HAV1 PE=1 SV=1;>sp|Q7Z2W4|ZCCHV_HUMAN Zinc finger CCCH-type antiviral protein 1 OS=Homo sapiens GN=ZC3HAV1 PE=1 SV=3	2	2	2	2	2.1	2.1	2.1	114.08	1024	1024;902	0	4.6758	0.27035	1.0548	8.585	2	1	Median	1.0085	1.003	1.4655	2	1	Median	3.8709	0.98883	15.146	2	1	Median	9919200	4862400	1143900	3912900				304	11779;13176	True;True	12191;13633	26475;29593
C9J7B1;C9K068;H7C333;O75323	C9J7B1;C9K068;H7C333;O75323	1;1;1;1	1;1;1;1	1;1;1;1	Protein NipSnap homolog 2	GBAS	>tr|C9J7B1|C9J7B1_HUMAN Protein NipSnap homolog 2 (Fragment) OS=Homo sapiens GN=GBAS PE=1 SV=1;>tr|C9K068|C9K068_HUMAN Protein NipSnap homolog 2 (Fragment) OS=Homo sapiens GN=GBAS PE=1 SV=5;>tr|H7C333|H7C333_HUMAN Protein NipSnap homolog 2 (Fragment) OS=Ho	4	1	1	1	13.8	13.8	13.8	7.939	65	65;81;114;286	0	2.9612	NaN	NaN	NaN	1	0	Median	NaN	NaN	NaN	1	0	Median	NaN	NaN	NaN	1	0	Median	25129000	10354000	3003200	11773000				305	11366	TRUE	11771	25483
C9J7Y4;Q8WWK9	C9J7Y4;Q8WWK9	1;1	1;1	1;1	Cytoskeleton-associated protein 2	CKAP2	>tr|C9J7Y4|C9J7Y4_HUMAN Cytoskeleton-associated protein 2 (Fragment) OS=Homo sapiens GN=CKAP2 PE=1 SV=1;>sp|Q8WWK9|CKAP2_HUMAN Cytoskeleton-associated protein 2 OS=Homo sapiens GN=CKAP2 PE=1 SV=1	2	1	1	1	13.4	13.4	13.4	10.865	97	97;683	0	16.982	NaN	NaN	NaN	1	0	Median	NaN	NaN	NaN	1	0	Median	NaN	NaN	NaN	1	0	Median	6691800	2666500	1083900	2941400				306	14734	TRUE	15255	33691
C9J8H1;P36543	C9J8H1;P36543	1;1	1;1	1;1	V-type proton ATPase subunit E 1	ATP6V1E1	>tr|C9J8H1|C9J8H1_HUMAN V-type proton ATPase subunit E 1 (Fragment) OS=Homo sapiens GN=ATP6V1E1 PE=1 SV=1;>sp|P36543|VATE1_HUMAN V-type proton ATPase subunit E 1 OS=Homo sapiens GN=ATP6V1E1 PE=1 SV=1	2	1	1	1	6.9	6.9	6.9	23.539	203	203;226	0	2.178	0.55172	2.1394	146.29	2	1	Median	1.0032	1.066	12.177	2	1	Median	1.8118	0.48681	133.6	2	1	Median	40670000	14171000	12125000	14374000				307	1392	TRUE	1442	3247;3248
C9J8T6;Q14061	C9J8T6;Q14061	1;1	1;1	1;1	Cytochrome c oxidase copper chaperone	COX17	>tr|C9J8T6|C9J8T6_HUMAN Cytochrome c oxidase copper chaperone OS=Homo sapiens GN=COX17 PE=1 SV=1;>sp|Q14061|COX17_HUMAN Cytochrome c oxidase copper chaperone OS=Homo sapiens GN=COX17 PE=1 SV=2	2	1	1	1	16.3	16.3	16.3	10.853	98	98;63	0	7.3693	NaN	NaN	NaN	1	0	Median	NaN	NaN	NaN	1	0	Median	NaN	NaN	NaN	1	0	Median	3183300	1390000	405100	1388200				308	10364	TRUE	10736	23412
C9J8U1;F8WAN1;Q69YQ0;C9JLY8	C9J8U1;F8WAN1;Q69YQ0;C9JLY8	2;2;2;1	2;2;2;1	2;2;2;1	Cytospin-A	SPECC1L;SPECC1L-ADORA2A	>tr|C9J8U1|C9J8U1_HUMAN Cytospin-A (Fragment) OS=Homo sapiens GN=SPECC1L PE=4 SV=5;>tr|F8WAN1|F8WAN1_HUMAN Protein SPECC1L-ADORA2A OS=Homo sapiens GN=SPECC1L-ADORA2A PE=4 SV=2;>sp|Q69YQ0|CYTSA_HUMAN Cytospin-A OS=Homo sapiens GN=SPECC1L PE=1 SV=2;>tr|C9JLY	4	2	2	2	2.8	2.8	2.8	88.282	789	789;911;1117;175	0.00050813	2.0302	0.44062	1.714	6.0069	2	0	Median	0.98619	0.93455	1.3781	2	0	Median	2.3186	0.55062	22.588	2	0	Median	11518000	4298100	2180700	5038900				309	9131;12709	True;True	9391;13149	20792;28542
C9J8Z4;Q969P0	C9J8Z4;Q969P0	1;1	1;1	1;1	Immunoglobulin superfamily member 8	IGSF8	>tr|C9J8Z4|C9J8Z4_HUMAN Immunoglobulin superfamily member 8 (Fragment) OS=Homo sapiens GN=IGSF8 PE=1 SV=1;>sp|Q969P0|IGSF8_HUMAN Immunoglobulin superfamily member 8 OS=Homo sapiens GN=IGSF8 PE=1 SV=1	2	1	1	1	3.3	3.3	3.3	32.284	301	301;613	0.0023267	1.2716	NaN	NaN	NaN	0	0	Median	NaN	NaN	NaN	0	0	Median	NaN	NaN	NaN	0	0	Median	1768200	0	0	1768200				310	14622	TRUE	15137	33392
C9J931;Q15382;C9J469	C9J931;Q15382;C9J469	2;2;1	2;2;1	2;2;1	GTP-binding protein Rheb	RHEB	>tr|C9J931|C9J931_HUMAN GTP-binding protein Rheb OS=Homo sapiens GN=RHEB PE=1 SV=1;>sp|Q15382|RHEB_HUMAN GTP-binding protein Rheb OS=Homo sapiens GN=RHEB PE=1 SV=1;>tr|C9J469|C9J469_HUMAN GTP-binding protein Rheb (Fragment) OS=Homo sapiens GN=RHEB PE=1 SV=	3	2	2	2	35.4	35.4	35.4	8.6739	79	79;184;19	0	22.599	0.26231	1.0838	0.57124	2	0	Median	0.92034	0.94526	1.163	2	0	Median	3.4761	0.85654	0.49155	2	0	Median	18095000	8280400	2359200	7455700				311	849;14379	True;True	881;14886	1960;32756
C9JA28;Q9UNL2	C9JA28;Q9UNL2	1;1	1;1	1;1	Translocon-associated protein subunit gamma	SSR3	>tr|C9JA28|C9JA28_HUMAN Translocon-associated protein subunit gamma OS=Homo sapiens GN=SSR3 PE=1 SV=1;>sp|Q9UNL2|SSRG_HUMAN Translocon-associated protein subunit gamma OS=Homo sapiens GN=SSR3 PE=1 SV=1	2	1	1	1	8	8	8	20.161	174	174;185	0	10.763	NaN	NaN	NaN	1	0	Median	NaN	NaN	NaN	1	0	Median	NaN	NaN	NaN	1	0	Median	24662000	10431000	3288000	10943000				312	10677	TRUE	11060	24001
C9JAF7;O95721	C9JAF7;O95721	1;1	1;1	1;1	Synaptosomal-associated protein;Synaptosomal-associated protein 29	SNAP29	>tr|C9JAF7|C9JAF7_HUMAN Synaptosomal-associated protein (Fragment) OS=Homo sapiens GN=SNAP29 PE=1 SV=1;>sp|O95721|SNP29_HUMAN Synaptosomal-associated protein 29 OS=Homo sapiens GN=SNAP29 PE=1 SV=1	2	1	1	1	6.9	6.9	6.9	17.963	160	160;258	0.0019075	1.421	0.24387	0.95841	1.6451	2	2	Median	0.96543	0.99133	5.0123	2	2	Median	3.9588	1.0216	6.6574	2	2	Median	16672000	7469100	2121300	7082000				313	12161	TRUE	12579	27309;27310
C9JAL9;J3QR50;J3QRW3;J3KRG1;Q9BZE9	C9JAL9;J3QR50;J3QRW3;J3KRG1;Q9BZE9	1;1;1;1;1	1;1;1;1;1	1;1;1;1;1	Tether containing UBX domain for GLUT4	ASPSCR1	>tr|C9JAL9|C9JAL9_HUMAN Tether-containing UBX domain for GLUT4 OS=Homo sapiens GN=ASPSCR1 PE=1 SV=2;>tr|J3QR50|J3QR50_HUMAN Tether-containing UBX domain for GLUT4 OS=Homo sapiens GN=ASPSCR1 PE=1 SV=1;>tr|J3QRW3|J3QRW3_HUMAN Tether-containing UBX domain for	5	1	1	1	27.6	27.6	27.6	6.184	58	58;160;182;188;553	0	2.5337	NaN	NaN	NaN	1	1	Median	NaN	NaN	NaN	1	1	Median	NaN	NaN	NaN	1	1	Median	6180600	2629100	528820	3022700				314	14583	TRUE	15097	33290
C9JAW5;C9JNU6;Q9Y241	C9JAW5;C9JNU6;Q9Y241	2;2;2	2;2;2	2;2;2	HIG1 domain family member 1A, mitochondrial	HIGD1A	>tr|C9JAW5|C9JAW5_HUMAN Uncharacterized protein OS=Homo sapiens PE=4 SV=1;>tr|C9JNU6|C9JNU6_HUMAN HIG1 domain family member 1A, mitochondrial OS=Homo sapiens GN=HIGD1A PE=4 SV=1;>sp|Q9Y241|HIG1A_HUMAN HIG1 domain family member 1A, mitochondrial OS=Homo sap	3	2	2	2	48.2	48.2	48.2	8.8131	83	83;96;93	0	20.828	0.31207	1.3958	23.7	2	0	Median	1.0523	1.0343	4.0601	2	0	Median	3.2699	0.73133	15.905	2	0	Median	24067000	9850600	3233000	10984000				315	2734;12063	True;True	2816;12478	6175;27062
C9JBI3;P78330	C9JBI3;P78330	1;1	1;1	1;1	Phosphoserine phosphatase	PSPH	>tr|C9JBI3|C9JBI3_HUMAN Phosphoserine phosphatase (Fragment) OS=Homo sapiens GN=PSPH PE=1 SV=1;>sp|P78330|SERB_HUMAN Phosphoserine phosphatase OS=Homo sapiens GN=PSPH PE=1 SV=2	2	1	1	1	7.5	7.5	7.5	20.745	187	187;225	0.0023452	1.3019	NaN	NaN	NaN	1	0	Median	NaN	NaN	NaN	1	0	Median	NaN	NaN	NaN	1	0	Median	26944000	12885000	5116300	8942800				316	7901	TRUE	8126	17924
E9PNC7;E9PQX9;C9JCC6;Q14919	E9PNC7;E9PQX9;C9JCC6;Q14919	2;2;2;2	2;2;2;2	2;2;2;2	Dr1-associated corepressor	DRAP1	>tr|E9PNC7|E9PNC7_HUMAN Dr1-associated corepressor (Fragment) OS=Homo sapiens GN=DRAP1 PE=1 SV=5;>tr|E9PQX9|E9PQX9_HUMAN Dr1-associated corepressor OS=Homo sapiens GN=DRAP1 PE=1 SV=1;>tr|C9JCC6|C9JCC6_HUMAN Dr1-associated corepressor OS=Homo sapiens GN=DRA	4	2	2	2	14.1	14.1	14.1	16.658	156	156;185;212;205	0	4.2369	0.26095	1.0255	8.2974	3	1	Median	0.93111	0.93893	4.4349	3	1	Median	3.4971	0.88226	4.5238	3	1	Median	19585000	8721200	2670900	8193100				317	923;13299	True;True	956;13762	2133;2134;29874
C9JD32;J3KT29;P62829;B9ZVP7;J3QQT9;J3KTJ3	C9JD32;J3KT29;P62829;B9ZVP7	7;7;7;6;1;1	7;7;7;6;1;1	7;7;7;6;1;1	60S ribosomal protein L23	RPL23	>tr|C9JD32|C9JD32_HUMAN 60S ribosomal protein L23 (Fragment) OS=Homo sapiens GN=RPL23 PE=1 SV=1;>tr|J3KT29|J3KT29_HUMAN 60S ribosomal protein L23 OS=Homo sapiens GN=RPL23 PE=1 SV=1;>sp|P62829|RL23_HUMAN 60S ribosomal protein L23 OS=Homo sapiens GN=RPL23 PE	6	7	7	7	62.6	62.6	62.6	9.6694	91	91;122;140;114;34;81	0	39.871	0.25951	1.1367	70.945	12	0	Median	0.93236	1.0022	8.0108	12	0	Median	3.765	0.89324	69.523	12	0	Median	1317800000	448630000	437260000	431910000				318	6469;6999;8477;8478;8500;8501;10050	True;True;True;True;True;True;True	6646;7196;8717;8718;8719;8720;8742;8743;8744;10409	14520;14521;14522;14523;14524;14525;14526;15596;15597;19394;19395;19396;19397;19398;19399;19400;19440;19441;19442;19443;19444;19445;22796;22797
C9JEH7;P22090	C9JEH7;P22090	8;8	2;2	1;1	40S ribosomal protein S4, Y isoform 1	RPS4Y1	>tr|C9JEH7|C9JEH7_HUMAN 40S ribosomal protein S4, Y isoform 1 (Fragment) OS=Homo sapiens GN=RPS4Y1 PE=1 SV=1;>sp|P22090|RS4Y1_HUMAN 40S ribosomal protein S4, Y isoform 1 OS=Homo sapiens GN=RPS4Y1 PE=1 SV=2	2	8	2	1	30.5	11.1	6.5	29.383	262	262;263	0	3.2739	0.23358	0.98399	8.1803	5	4	Median	1.5213	1.6221	9.4144	5	4	Plateau	6.2126	1.7506	6.4205	5	4	Linear	53780000	20275000	4590900	28914000				319	3256;3576;4589;5408;8084;8751;8970;14922	False;True;False;False;False;True;False;False	3350;3673;4712;5546;8313;8999;9225;15450	7228;7956;7957;10118;10119;12012;18472;19967;19968;19969;20459;34068;34069;34070
C9JFR7;CON__P62894;P99999	C9JFR7;CON__P62894;P99999	1;1;1	1;1;1	1;1;1	Cytochrome c	CYCS	>tr|C9JFR7|C9JFR7_HUMAN Cytochrome c (Fragment) OS=Homo sapiens GN=CYCS PE=1 SV=1;>P62894 SWISS-PROT:P62894 Cytochrome c - Bos taurus (Bovine).;>sp|P99999|CYC_HUMAN Cytochrome c OS=Homo sapiens GN=CYCS PE=1 SV=2	3	1	1	1	10.9	10.9	10.9	11.333	101	101;105;105	0	3.7459	0.25191	1.148	12.499	3	0	Median	0.95538	0.9889	2.4795	3	0	Median	3.881	0.88891	17.032	3	0	Median	53430000	23237000	6471100	23722000			+	320	12560	TRUE	12994	28154;28155;28156;28157;28158
C9JHW1;E7ESB6;I1E4Y6;Q6Y7W6;C9JW88;F8WCD5;C9JPV7;C9JXQ0;C9J0V6;C9JHT0;C9JRZ2	C9JHW1;E7ESB6;I1E4Y6;Q6Y7W6;C9JW88;F8WCD5;C9JPV7;C9JXQ0;C9J0V6;C9JHT0;C9JRZ2	2;2;2;2;1;1;1;1;1;1;1	2;2;2;2;1;1;1;1;1;1;1	2;2;2;2;1;1;1;1;1;1;1	PERQ amino acid-rich with GYF domain-containing protein 2	GIGYF2	>tr|C9JHW1|C9JHW1_HUMAN PERQ amino acid-rich with GYF domain-containing protein 2 (Fragment) OS=Homo sapiens GN=GIGYF2 PE=1 SV=1;>tr|E7ESB6|E7ESB6_HUMAN PERQ amino acid-rich with GYF domain-containing protein 2 (Fragment) OS=Homo sapiens GN=GIGYF2 PE=1 SV=	11	2	2	2	5.1	5.1	5.1	81.788	720	720;836;1321;1299;68;92;93;100;106;113;115	0	9.2046	0.53572	1.9639	24.14	3	3	Median	1.0386	0.96536	8.6178	3	3	Median	1.9344	0.53963	28.843	3	3	Median	14606000	5829000	2876000	5900600				321	64;126	True;True	66;129	104;105;222
H7C1U0;C9JIF9;P13798;C9JLK2;H7C393;H0YFE5	H7C1U0;C9JIF9;P13798;C9JLK2;H7C393	4;4;4;2;2;1	4;4;4;2;2;1	4;4;4;2;2;1	Acylamino-acid-releasing enzyme	APEH	>tr|H7C1U0|H7C1U0_HUMAN Acylamino-acid-releasing enzyme (Fragment) OS=Homo sapiens GN=APEH PE=1 SV=1;>tr|C9JIF9|C9JIF9_HUMAN Acylamino-acid-releasing enzyme OS=Homo sapiens GN=APEH PE=1 SV=1;>sp|P13798|ACPH_HUMAN Acylamino-acid-releasing enzyme OS=Homo sap	6	4	4	4	14.3	14.3	14.3	34.583	308	308;737;732;232;284;47	0	10.152	0.27835	1.0912	15.881	4	2	Median	1.0782	1.0818	6.8373	4	2	Median	3.7949	0.93368	11.221	4	2	Median	42559000	16923000	5478700	20158000				322	894;11082;14594;14649	True;True;True;True	926;11476;15108;15167	2054;24926;33315;33493
C9JIZ6;P07602;Q5BJH1	C9JIZ6;P07602	3;3;1	3;3;1	3;3;1	Prosaposin;Saposin-A;Saposin-B-Val;Saposin-B;Saposin-C;Saposin-D	PSAP	>tr|C9JIZ6|C9JIZ6_HUMAN Prosaposin OS=Homo sapiens GN=PSAP PE=1 SV=2;>sp|P07602|SAP_HUMAN Prosaposin OS=Homo sapiens GN=PSAP PE=1 SV=2	3	3	3	3	7.4	7.4	7.4	58.44	527	527;524;240	0	9.5234	0.25612	1.0654	21.863	3	0	Median	0.84497	0.83259	7.7834	3	0	Median	3.5783	0.85184	28.026	3	0	Median	17157000	8086000	2159600	6910900				323	2964;4262;11175	True;True;True	3055;4376;11570	6709;6710;6711;9377;25089
C9JJT5;G3V325	C9JJT5;G3V325	3;3	3;3	1;1		ATP5J2-PTCD1	>tr|C9JJT5|C9JJT5_HUMAN Protein ATP5J2-PTCD1 OS=Homo sapiens GN=ATP5J2-PTCD1 PE=4 SV=2;>tr|G3V325|G3V325_HUMAN Protein ATP5J2-PTCD1 OS=Homo sapiens GN=ATP5J2-PTCD1 PE=4 SV=1	2	3	3	1	63	63	18.5	5.9149	54	54;749	0	19.938	0.26902	1.1189	2.3624	6	0	Median	1.055	1.038	2.4152	6	0	Median	3.7758	0.94174	5.8011	6	0	Median	71722000	30832000	9260900	31630000				324	1526;2113;7743	True;True;True	1578;2180;7965;7966	3568;3569;4893;4894;17556;17557;17558;17559
C9JKQ2;O43676	C9JKQ2;O43676	1;1	1;1	1;1	NADH dehydrogenase [ubiquinone] 1 beta subcomplex subunit 3	NDUFB3	>tr|C9JKQ2|C9JKQ2_HUMAN NADH dehydrogenase [ubiquinone] 1 beta subcomplex subunit 3 (Fragment) OS=Homo sapiens GN=NDUFB3 PE=1 SV=1;>sp|O43676|NDUB3_HUMAN NADH dehydrogenase [ubiquinone] 1 beta subcomplex subunit 3 OS=Homo sapiens GN=NDUFB3 PE=1 SV=3	2	1	1	1	16.9	16.9	16.9	7.5855	65	65;98	0	2.067	NaN	NaN	NaN	1	1	Median	NaN	NaN	NaN	1	1	Median	NaN	NaN	NaN	1	1	Median	10926000	4714800	1736500	4474600				325	5724	TRUE	5871	12772
E7EN55;C9JL41;D6RDI2;J3KPP4;O95232	E7EN55;C9JL41;D6RDI2;J3KPP4;O95232	1;1;1;1;1	1;1;1;1;1	1;1;1;1;1	Luc7-like protein 3	LUC7L3	>tr|E7EN55|E7EN55_HUMAN Luc7-like protein 3 OS=Homo sapiens GN=LUC7L3 PE=1 SV=1;>tr|C9JL41|C9JL41_HUMAN Luc7-like protein 3 OS=Homo sapiens GN=LUC7L3 PE=1 SV=1;>tr|D6RDI2|D6RDI2_HUMAN Luc7-like protein 3 (Fragment) OS=Homo sapiens GN=LUC7L3 PE=1 SV=1;>tr|J	5	1	1	1	29.6	29.6	29.6	6.4234	54	54;79;184;489;432	0	4.3253	NaN	NaN	NaN	1	0	Median	NaN	NaN	NaN	1	0	Median	NaN	NaN	NaN	1	0	Median	4691500	2056900	392710	2241900				326	9488	TRUE	9790	21607
C9JL85;P58546	C9JL85;P58546	3;3	3;3	3;3	Myotrophin	MTPN	>tr|C9JL85|C9JL85_HUMAN Myotrophin OS=Homo sapiens GN=MTPN PE=1 SV=1;>sp|P58546|MTPN_HUMAN Myotrophin OS=Homo sapiens GN=MTPN PE=1 SV=2	2	3	3	3	57.7	57.7	57.7	5.7044	52	52;118	0	40.209	0.22837	0.98507	29.977	4	0	Median	0.92621	0.93355	4.8228	4	0	Median	3.9886	0.89741	8.713	4	0	Median	53017000	24006000	6201800	22810000				327	1907;4869;13190	True;True;True	1965;1966;4998;13647	4435;4436;4437;10792;10793;29631
C9JLU1;P52434	C9JLU1;P52434	2;2	2;2	2;2	DNA-directed RNA polymerases I, II, and III subunit RPABC3	POLR2H	>tr|C9JLU1|C9JLU1_HUMAN DNA-directed RNA polymerases I, II, and III subunit RPABC3 (Fragment) OS=Homo sapiens GN=POLR2H PE=1 SV=5;>sp|P52434|RPAB3_HUMAN DNA-directed RNA polymerases I, II, and III subunit RPABC3 OS=Homo sapiens GN=POLR2H PE=1 SV=4	2	2	2	2	12.8	12.8	12.8	16.996	149	149;150	0	26.206	0.20084	0.80945	21.016	3	0	Median	1.0771	1.1055	3.4306	3	0	Median	5.384	1.3746	21.644	3	0	Median	17582000	7744900	1520000	8317100				328	575;576	True;True	595;596	1275;1276;1277
C9JMG5;O00291	C9JMG5;O00291	1;1	1;1	1;1	Huntingtin-interacting protein 1	HIP1	>tr|C9JMG5|C9JMG5_HUMAN Huntingtin-interacting protein 1 (Fragment) OS=Homo sapiens GN=HIP1 PE=1 SV=1;>sp|O00291|HIP1_HUMAN Huntingtin-interacting protein 1 OS=Homo sapiens GN=HIP1 PE=1 SV=5	2	1	1	1	6.8	6.8	6.8	16.875	146	146;1037	0.0014361	1.4703	0.41523	1.5605	1.2103	2	2	Median	1.0283	0.97183	18.541	2	2	Median	2.4764	0.63095	17.33	2	2	Median	6334300	2393800	715580	3224900				329	763	TRUE	793	1772;1773
C9JXB8;C9JNW5;P83731	C9JXB8;C9JNW5;P83731	7;7;7	7;7;7	7;7;7	60S ribosomal protein L24	RPL24	>tr|C9JXB8|C9JXB8_HUMAN 60S ribosomal protein L24 OS=Homo sapiens GN=RPL24 PE=1 SV=1;>tr|C9JNW5|C9JNW5_HUMAN 60S ribosomal protein L24 OS=Homo sapiens GN=RPL24 PE=1 SV=1;>sp|P83731|RL24_HUMAN 60S ribosomal protein L24 OS=Homo sapiens GN=RPL24 PE=1 SV=1	3	7	7	7	45.5	45.5	45.5	14.369	121	121;150;157	0	23.503	0.22853	0.8889	7.6777	6	0	Median	0.95376	0.96367	2.8519	6	0	Median	4.2255	1.0557	10.319	6	0	Median	556930000	248640000	67817000	240480000				330	781;782;1916;9509;10528;12394;13669	True;True;True;True;True;True;True	811;812;813;1975;9819;10909;12820;14141	1808;1809;1810;1811;1812;4452;21660;21661;23733;27794;27795;27796;30822;30823
C9JP16;O75718	C9JP16;O75718	2;2	2;2	2;2	Cartilage-associated protein	CRTAP	>tr|C9JP16|C9JP16_HUMAN Cartilage-associated protein OS=Homo sapiens GN=CRTAP PE=1 SV=1;>sp|O75718|CRTAP_HUMAN Cartilage-associated protein OS=Homo sapiens GN=CRTAP PE=1 SV=1	2	2	2	2	6.4	6.4	6.4	41.432	358	358;401	0	3.9068	0.27463	1.0031	6.0812	2	0	Median	0.98863	1.0146	0.31709	2	0	Median	3.6656	0.89408	19.08	2	0	Median	27042000	11872000	3597500	11573000				331	3825;13058	True;True	3929;13512	8502;29367
C9JQ41;H7C525;Q4VC31;C9JBU9	C9JQ41;H7C525;Q4VC31	4;4;4;1	4;4;4;1	4;4;4;1	Coiled-coil domain-containing protein 58	CCDC58	>tr|C9JQ41|C9JQ41_HUMAN Coiled-coil domain-containing protein 58 OS=Homo sapiens GN=CCDC58 PE=1 SV=1;>tr|H7C525|H7C525_HUMAN Coiled-coil domain-containing protein 58 (Fragment) OS=Homo sapiens GN=CCDC58 PE=1 SV=1;>sp|Q4VC31|CCD58_HUMAN Coiled-coil domain-c	4	4	4	4	39.2	39.2	39.2	15.296	130	130;141;144;53	0	11.258	0.24122	1.058	28.358	3	0	Median	0.95993	0.98578	4.9255	3	0	Median	3.9601	0.94039	22.278	3	0	Median	68000000	20625000	5282800	42092000				332	5911;9746;9948;12634	True;True;True;True	6062;10095;10302;13071	13187;22189;22190;22550;28362
F8WF90;C9JQU6;F8WF33;O75915	F8WF90;C9JQU6;F8WF33;O75915	1;1;1;1	1;1;1;1	1;1;1;1	PRA1 family protein 3	ARL6IP5	>tr|F8WF90|F8WF90_HUMAN PRA1 family protein 3 OS=Homo sapiens GN=ARL6IP5 PE=1 SV=1;>tr|C9JQU6|C9JQU6_HUMAN PRA1 family protein 3 OS=Homo sapiens GN=ARL6IP5 PE=1 SV=1;>tr|F8WF33|F8WF33_HUMAN PRA1 family protein 3 OS=Homo sapiens GN=ARL6IP5 PE=1 SV=1;>sp|O75	4	1	1	1	18.6	18.6	18.6	6.8708	59	59;88;93;188	0.0027523	1.1828	NaN	NaN	NaN	0	0	Median	NaN	NaN	NaN	0	0	Median	NaN	NaN	NaN	0	0	Median	602090	602090	0	0				333	1819	TRUE	1876	4226
C9JRJ8;E9PFW8;E7EMC7;Q13501;E3W990	C9JRJ8;E9PFW8;E7EMC7;Q13501;E3W990	3;3;3;3;2	3;3;3;3;2	3;3;3;3;2	Sequestosome-1	SQSTM1	>tr|C9JRJ8|C9JRJ8_HUMAN Sequestosome-1 (Fragment) OS=Homo sapiens GN=SQSTM1 PE=1 SV=1;>tr|E9PFW8|E9PFW8_HUMAN Sequestosome-1 (Fragment) OS=Homo sapiens GN=SQSTM1 PE=1 SV=1;>tr|E7EMC7|E7EMC7_HUMAN Sequestosome-1 OS=Homo sapiens GN=SQSTM1 PE=1 SV=1;>sp|Q1350	5	3	3	3	22.1	22.1	22.1	15.74	140	140;167;378;440;190	0	4.2687	0.19939	0.82829	2.2699	3	0	Median	1.0396	1.0533	6.2022	3	0	Median	5.8709	1.3874	4.3435	3	0	Median	49680000	21750000	6459600	21470000				334	2179;7325;10819	True;True;True	2248;7535;11202	5018;16407;24293
C9JY28;C9JRX8;F5H189;Q9HD34;C9J799;H7C4Q5	C9JY28;C9JRX8;F5H189;Q9HD34;C9J799;H7C4Q5	2;2;2;2;1;1	2;2;2;2;1;1	2;2;2;2;1;1	LYR motif-containing protein 4	LYRM4	>tr|C9JY28|C9JY28_HUMAN LYR motif-containing protein 4 OS=Homo sapiens GN=LYRM4 PE=1 SV=1;>tr|C9JRX8|C9JRX8_HUMAN LYR motif-containing protein 4 OS=Homo sapiens GN=LYRM4 PE=1 SV=1;>tr|F5H189|F5H189_HUMAN LYR motif-containing protein 4 OS=Homo sapiens GN=LY	6	2	2	2	30	30	30	8.2474	70	70;96;130;91;40;74	0	3.4484	0.59325	2.0821	25.78	3	2	Median	1.0857	1.0941	6.5518	3	2	Plateau	1.6006	0.36227	49.736	3	2	Median	17977000	6576500	3802000	7598400				335	3951;10278	True;True	4058;10649	8740;23260;23261
C9JRZ6;Q9NX63;F8WAR4;F8WD73	C9JRZ6;Q9NX63;F8WAR4	7;7;6;1	7;7;6;1	7;7;6;1	MICOS complex subunit MIC19	CHCHD3	>tr|C9JRZ6|C9JRZ6_HUMAN MICOS complex subunit MIC19 OS=Homo sapiens GN=CHCHD3 PE=1 SV=1;>sp|Q9NX63|MIC19_HUMAN MICOS complex subunit MIC19 OS=Homo sapiens GN=CHCHD3 PE=1 SV=1;>tr|F8WAR4|F8WAR4_HUMAN MICOS complex subunit MIC19 OS=Homo sapiens GN=CHCHD3 PE=	4	7	7	7	26.3	26.3	26.3	26.694	232	232;227;241;63	0	48.737	0.28539	1.129	7.0352	7	0	Median	0.9137	0.92665	4.6955	7	0	Median	3.2153	0.81254	4.9843	7	0	Median	264530000	118500000	35802000	110230000				336	7125;8824;13320;13321;15002;15360;15361	True;True;True;True;True;True;True	7323;9073;13783;13784;15530;15904;15905	15842;20115;20116;29921;29922;29923;34227;34228;35089;35090
G3V580;G3V2L6;C9JSX3;O14744	G3V580;G3V2L6;C9JSX3;O14744	2;2;2;2	2;2;2;2	1;1;1;1	Protein arginine N-methyltransferase 5;Protein arginine N-methyltransferase 5, N-terminally processed	PRMT5	>tr|G3V580|G3V580_HUMAN Protein arginine N-methyltransferase 5 (Fragment) OS=Homo sapiens GN=PRMT5 PE=1 SV=1;>tr|G3V2L6|G3V2L6_HUMAN Protein arginine N-methyltransferase 5 (Fragment) OS=Homo sapiens GN=PRMT5 PE=1 SV=1;>tr|C9JSX3|C9JSX3_HUMAN Protein argini	4	2	2	1	17.2	17.2	7.8	20.375	180	180;183;186;637	0.0014486	1.5445	0.28551	1.1453	1.7723	2	2	Median	1.1089	1.0764	2.8182	2	2	Median	3.8837	0.9723	2.146	2	2	Median	20120000	7873600	2317200	9929000				337	2362;10483	True;True	2432;10863	5367;23663
C9JTA2;C9K086;Q9Y6D9	C9JTA2;C9K086;Q9Y6D9	1;1;1	1;1;1	1;1;1	Mitotic spindle assembly checkpoint protein MAD1	MAD1L1	>tr|C9JTA2|C9JTA2_HUMAN Mitotic spindle assembly checkpoint protein MAD1 (Fragment) OS=Homo sapiens GN=MAD1L1 PE=1 SV=1;>tr|C9K086|C9K086_HUMAN Mitotic spindle assembly checkpoint protein MAD1 (Fragment) OS=Homo sapiens GN=MAD1L1 PE=1 SV=1;>sp|Q9Y6D9|MD1L1	3	1	1	1	5.4	5.4	5.4	24.176	205	205;213;718	0.0040724	1.0934	NaN	NaN	NaN	1	1	Median	NaN	NaN	NaN	1	1	Median	NaN	NaN	NaN	1	1	Median	2940100	1250200	660510	1029400				338	6353	TRUE	6527	14236
C9JTN7;F8W8I6;Q01085;P31483;F8WE16;E7ETC0;E5RGV5;E5RG67	C9JTN7;F8W8I6;Q01085;P31483;F8WE16;E7ETC0;E5RGV5;E5RG67	2;2;2;2;1;1;1;1	2;2;2;2;1;1;1;1	2;2;2;2;1;1;1;1	Nucleolysin TIAR;Nucleolysin TIA-1 isoform p40	TIA1;TIAL1	>tr|C9JTN7|C9JTN7_HUMAN Nucleolysin TIA-1 isoform p40 OS=Homo sapiens GN=TIA1 PE=1 SV=1;>tr|F8W8I6|F8W8I6_HUMAN Nucleolysin TIA-1 isoform p40 OS=Homo sapiens GN=TIA1 PE=1 SV=1;>sp|Q01085|TIAR_HUMAN Nucleolysin TIAR OS=Homo sapiens GN=TIAL1 PE=1 SV=1;>sp|P3	8	2	2	2	7.7	7.7	7.7	31.624	285	285;385;375;386;114;135;144;161	0.00097656	1.6636	0.30157	1.0443	1.6075	2	0	Median	1.0407	1.0389	9.6646	2	0	Median	3.3501	0.93428	9.5683	2	0	Median	41471000	16955000	6293200	18223000				339	10709;12855	True;True	11092;13305	24099;28897
C9JVE2;Q96GG9;C9JRU6;C9J0B2;C9JUW4;C9J8R4	C9JVE2;Q96GG9;C9JRU6;C9J0B2;C9JUW4;C9J8R4	2;2;1;1;1;1	2;2;1;1;1;1	2;2;1;1;1;1	DCN1-like protein;DCN1-like protein 1	DCUN1D1	>tr|C9JVE2|C9JVE2_HUMAN DCN1-like protein OS=Homo sapiens GN=DCUN1D1 PE=1 SV=1;>sp|Q96GG9|DCNL1_HUMAN DCN1-like protein 1 OS=Homo sapiens GN=DCUN1D1 PE=1 SV=1;>tr|C9JRU6|C9JRU6_HUMAN DCN1-like protein (Fragment) OS=Homo sapiens GN=DCUN1D1 PE=1 SV=1;>tr|C9J	6	2	2	2	11.1	11.1	11.1	28.305	244	244;259;75;92;98;128	0	18.183	0.28795	1.1821	24.3	2	1	Median	1.142	1.16	10.072	2	1	Median	3.8117	0.96982	30.253	2	1	Median	10811000	4875600	1500400	4434600				340	7541;9419	True;True	7761;9709	17051;21477
C9JW74;Q5EB52;R4GN52;C9JWU9;C9JSW2	C9JW74;Q5EB52;R4GN52;C9JWU9;C9JSW2	2;2;1;1;1	2;2;1;1;1	2;2;1;1;1	Mesoderm-specific transcript homolog protein	MEST	>tr|C9JW74|C9JW74_HUMAN Mesoderm-specific transcript homolog protein OS=Homo sapiens GN=MEST PE=1 SV=1;>sp|Q5EB52|MEST_HUMAN Mesoderm-specific transcript homolog protein OS=Homo sapiens GN=MEST PE=2 SV=2;>tr|R4GN52|R4GN52_HUMAN Mesoderm-specific transcript	5	2	2	2	9.1	9.1	9.1	34.348	296	296;335;173;213;232	0	9.9385	0.18659	0.7259	40.015	3	0	Median	1.2405	1.216	12.953	3	0	Median	5.896	1.5009	24.596	3	0	Median	22574000	9254000	2302600	11018000				341	8416;10063	True;True	8653;10426	19269;19270;22858
C9JYM0;O75817	C9JYM0;O75817	1;1	1;1	1;1	Ribonuclease P protein subunit p20	POP7	>tr|C9JYM0|C9JYM0_HUMAN Ribonuclease P protein subunit p20 (Fragment) OS=Homo sapiens GN=POP7 PE=1 SV=1;>sp|O75817|POP7_HUMAN Ribonuclease P protein subunit p20 OS=Homo sapiens GN=POP7 PE=1 SV=2	2	1	1	1	10.9	10.9	10.9	15.324	137	137;140	0	7.2293	NaN	NaN	NaN	1	0	Median	NaN	NaN	NaN	1	0	Median	NaN	NaN	NaN	1	0	Median	5366900	2333600	470590	2562700				342	4232	TRUE	4346	9323
H0YJG9;H0YJP4;C9JZP6;Q13268	H0YJG9;H0YJP4;C9JZP6;Q13268	2;2;2;2	2;2;2;2	2;2;2;2	Dehydrogenase/reductase SDR family member 2, mitochondrial	DHRS2	>tr|H0YJG9|H0YJG9_HUMAN Dehydrogenase/reductase SDR family member 2, mitochondrial (Fragment) OS=Homo sapiens GN=DHRS2 PE=1 SV=1;>tr|H0YJP4|H0YJP4_HUMAN Dehydrogenase/reductase SDR family member 2, mitochondrial (Fragment) OS=Homo sapiens GN=DHRS2 PE=1 SV=	4	2	2	2	10.6	10.6	10.6	17.471	161	161;180;225;280	0.0091944	0.88881	0.37898	1.5479	7.4396	2	2	Median	1.2721	1.305	2.399	2	2	Median	3.3566	0.85511	9.9833	2	2	Median	9556800	3528800	1611600	4416400				343	12317;12740	True;True	12741;13180	27627;28611
C9JZR2;O60716;H0YC95;E9PRE2	C9JZR2;O60716	7;7;1;1	7;7;1;1	7;7;1;1	Catenin delta-1	CTNND1	>tr|C9JZR2|C9JZR2_HUMAN Catenin delta-1 OS=Homo sapiens GN=CTNND1 PE=1 SV=2;>sp|O60716|CTND1_HUMAN Catenin delta-1 OS=Homo sapiens GN=CTNND1 PE=1 SV=1	4	7	7	7	9.7	9.7	9.7	104.85	938	938;968;123;261	0	9.6465	0.17912	0.72549	3.6325	3	0	Median	1.0569	1.0245	4.1161	3	0	Median	5.7116	1.3821	10.761	3	0	Median	65125000	28470000	8986600	27668000				344	1070;5212;5263;9741;11929;12903;13724	True;True;True;True;True;True;True	1108;5348;5400;10090;12343;13356;14198	2488;2489;11510;11511;11638;22184;26800;29006;30950
CON__A2I7N3	CON__A2I7N3	7	1	1			>A2I7N3 TREMBL:A2I7N3;Q27984 (Bos taurus) SERPINA3-7	1	7	1	1	18.7	2.4	2.4	46.941	417	417	0.010017	0.85919	NaN	NaN	NaN	1	1	Median	NaN	NaN	NaN	1	1	Median	NaN	NaN	NaN	1	1	Median	27933000	26914000	479330	539580			+	345	2001;2208;2209;3969;7959;8998;12932	False;False;False;True;False;False;False	2065;2277;2278;4077;8185;9254;13386	4593;5067;5068;5069;5070;8779;18060;18061;20518;29094
CON__ENSEMBL:ENSBTAP00000007350;CON__P01030;P0C0L4;F5GXS0;P0C0L5	CON__ENSEMBL:ENSBTAP00000007350;CON__P01030	31;26;4;3;3	31;26;4;3;3	31;26;4;3;3			>ENSEMBL:ENSBTAP00000007350 (Bos taurus) similar to Complement C4-A precursor;>P01030 SWISS-PROT:P01030 (Bos taurus) similar to Complement C4-A precursor	5	31	31	31	25	25	25	192.99	1742	1742;1741;1744;1698;1744	0	106.56	0.078316	0.29702	72.158	30	30	Median	0.093941	0.09558	84.074	23	23	Median	0.9597	0.24171	112.66	23	23	Median	572100000	528500000	25454000	18140000			+	346	1100;1143;1979;2522;2787;3383;3679;4083;4936;4951;4984;5900;6577;7836;8256;8270;8364;8622;9065;10112;10670;11405;11986;13105;13467;13532;13711;14413;14516;15146;15429	True;True;True;True;True;True;True;True;True;True;True;True;True;True;True;True;True;True;True;True;True;True;True;True;True;True;True;True;True;True;True	1139;1183;2041;2601;2872;3479;3777;4193;5066;5083;5116;6051;6765;8060;8486;8500;8596;8866;9323;10475;11053;11811;12400;13561;13933;13998;14184;14922;15027;15677;15973	2563;2564;2565;2633;4550;5697;5698;6292;7538;8136;8982;8983;10933;10966;11028;11029;13166;13167;14765;14766;17774;18873;18874;18875;18900;19120;19707;19708;19709;20673;22950;23990;23991;23992;25581;26911;29470;29471;29472;30311;30473;30919;32814;33072;33073;33074;33075;34583;34584;35241
CON__ENSEMBL:ENSBTAP00000014147	CON__ENSEMBL:ENSBTAP00000014147	2	2	2			>ENSEMBL:ENSBTAP00000014147 (Bos taurus) 12 kDa protein	1	2	2	2	27.4	27.4	27.4	11.756	113	113	0	5.2953	NaN	NaN	NaN	1	1	Median	NaN	NaN	NaN	1	1	Median	NaN	NaN	NaN	1	1	Median	16188000	16045000	100910	42286			+	347	12656;14176	True;True	13094;14673	28409;32229
CON__ENSEMBL:ENSBTAP00000016046;P23142;B1AHL2	CON__ENSEMBL:ENSBTAP00000016046	6;2;1	6;2;1	6;2;1			>ENSEMBL:ENSBTAP00000016046 (Bos taurus) similar to fibulin-1 C isoform 1	3	6	6	6	10.9	10.9	10.9	77.456	706	706;703;721	0	52.502	0.09097	0.39459	57.217	7	7	Median	0.072715	0.070827	88.86	5	5	Median	1.8301	0.44886	93.602	5	5	Median	48614000	44561000	2283800	1768500			+	348	673;2836;4928;5224;12376;14443	True;True;True;True;True;True	700;2922;5058;5361;12802;14953	1547;6384;10912;10913;11536;11537;11538;11539;27765;27766;32879;32880
CON__ENSEMBL:ENSBTAP00000018229;D6RBJ7;D6RF35;P02774;D6RF20	CON__ENSEMBL:ENSBTAP00000018229	18;4;4;4;1	18;4;4;4;1	3;0;0;0;0			>ENSEMBL:ENSBTAP00000018229 (Bos taurus) 54 kDa protein	5	18	18	3	44.2	44.2	5.9	53.661	475	475;348;476;474;145	0	104.39	0.10884	0.44807	79.485	34	34	Median	0.086337	0.085377	130.01	26	26	Median	0.78218	0.19671	136.15	26	26	Median	1383800000	1249100000	71248000	63440000			+	349	2068;2293;3112;3527;4636;4637;5303;5428;5429;5430;5642;6302;7001;11115;11550;12260;14009;14328	True;True;True;True;True;True;True;True;True;True;True;True;True;True;True;True;True;True	2134;2362;3205;3624;4761;4762;5440;5569;5570;5571;5787;6475;7198;11510;11958;12681;14500;14835	4781;5223;5224;6988;7840;7841;7842;10236;10237;10238;11710;12064;12065;12066;12067;12608;12609;14122;15600;24977;25902;25903;25904;27502;31877;31878;31879;31880;32608;32609;32610;32611;32612;32613;32614;32615;32616;32617
CON__ENSEMBL:ENSBTAP00000024146;P01023;P20742;F5GXY0	CON__ENSEMBL:ENSBTAP00000024146	64;6;3;1	64;6;3;1	64;6;3;1			>ENSEMBL:ENSBTAP00000024146 (Bos taurus) similar to alpha-2-macroglobulin isoform 1	4	64	64	64	52.7	52.7	52.7	164.34	1477	1477;1474;1482;144	0	323.31	0.075893	0.29316	103.02	377	377	Median	0.065396	0.06177	114.82	293	293	Median	0.94652	0.23471	117.42	293	293	Median	5692700000	5296000000	211880000	184760000			+	350	536;750;993;1267;1442;1639;1683;2122;2321;2340;2420;2538;2541;2893;3152;3936;4221;4323;4852;4989;5225;5297;5584;5636;6049;6345;6346;6655;6656;6751;6819;6832;7249;8239;8369;8561;8834;8835;9676;9717;9787;10113;10162;10163;10674;10726;11593;11594;11785;11866;12084;13014;13670;13742;14100;14448;14449;14502;14503;14518;14768;14991;15043;15338	True;True;True;True;True;True;True;True;True;True;True;True;True;True;True;True;True;True;True;True;True;True;True;True;True;True;True;True;True;True;True;True;True;True;True;True;True;True;True;True;True;True;True;True;True;True;True;True;True;True;True;True;True;True;True;True;True;True;True;True;True;True;True;True	555;780;1027;1315;1493;1494;1693;1738;1739;2190;2390;2409;2494;2617;2620;2982;3245;4043;4335;4438;4980;5121;5362;5434;5729;5781;6204;6519;6520;6843;6844;6941;7011;7025;7454;8469;8602;8804;9083;9084;10018;10065;10136;10476;10528;10529;11057;11109;12001;12002;12197;12279;12280;12499;13468;14142;14143;14216;14594;14958;14959;15013;15014;15029;15290;15519;15571;15881	1171;1172;1173;1174;1175;1176;1177;1178;1179;1180;1181;1182;1183;1714;1715;1716;1717;1718;1719;1720;1721;1722;1723;1724;1725;1726;1727;1728;1729;2274;2275;2276;2277;2278;2279;2280;2281;2282;2283;2284;2285;2286;2287;2288;2289;2290;2291;2292;2293;2294;2295;2296;2297;2298;2299;2300;2301;2918;2919;2920;3361;3362;3363;3364;3365;3366;3367;3368;3369;3370;3371;3372;3373;3374;3375;3376;3377;3378;3379;3380…
CON__ENSEMBL:ENSBTAP00000024466;CON__ENSEMBL:ENSBTAP00000024462	CON__ENSEMBL:ENSBTAP00000024466;CON__ENSEMBL:ENSBTAP00000024462	3;3	3;3	3;3			>ENSEMBL:ENSBTAP00000024466 (Bos taurus) 44 kDa protein;>ENSEMBL:ENSBTAP00000024462 (Bos taurus) 47 kDa protein	2	3	3	3	13.5	13.5	13.5	43.9	401	401;419	0	4.1343	0.097026	0.38586	47.521	3	3	Median	0.043152	0.041153	97.576	3	3	Median	0.51166	0.12485	58.302	3	3	Median	33303000	30469000	1902600	931750			+	351	2545;3212;13800	True;True;True	2624;3306;14276	5801;7148;31195;31196
CON__ENSEMBL:ENSBTAP00000032840	CON__ENSEMBL:ENSBTAP00000032840	14	14	12			>ENSEMBL:ENSBTAP00000032840 (Bos taurus) similar to apolipoprotein B, partial	1	14	14	12	20.7	20.7	17.5	92.273	825	825	0	30.006	0.081646	0.33132	92.001	14	14	Median	0.075648	0.056869	109.72	6	6	Median	0.69103	0.12928	106.28	6	6	Median	38698000	36587000	1241200	869490			+	352	2085;3407;4374;4777;4858;5723;6130;6574;7440;7895;10751;11231;11484;13571	True;True;True;True;True;True;True;True;True;True;True;True;True;True	2151;3504;4489;4903;4987;5870;6287;6762;7655;8120;11134;11628;11892;14038	4825;7575;9607;9608;9609;9610;10539;10767;12768;12769;12770;12771;13740;13741;14760;16731;17903;17904;17905;17906;17907;24181;25194;25195;25196;25753;25754;25755;25756;30569
CON__ENSEMBL:ENSBTAP00000037665	CON__ENSEMBL:ENSBTAP00000037665	5	5	5			>ENSEMBL:ENSBTAP00000037665 (Bos taurus) similar to Pregnancy zone protein, partial	1	5	5	5	14.4	14.4	14.4	65.19	578	578	0	14.854	0.16009	0.59058	32.441	5	5	Median	0.15406	0.14592	86.137	5	5	Median	0.59273	0.15683	106.07	5	5	Median	22584000	18017000	2314700	2252000			+	353	428;5727;5789;8659;12256	True;True;True;True;True	445;5874;5938;8904;12677	906;12776;12900;12901;19776;27493
CON__ENSEMBL:ENSBTAP00000038253	CON__ENSEMBL:ENSBTAP00000038253	11	1	1			>ENSEMBL:ENSBTAP00000038253 (Bos taurus) 63 kDa protein	1	11	1	1	15.3	2.8	2.8	63.165	606	606	1	-2	NaN	NaN	NaN	1	0	Median	NaN	NaN	NaN	1	0	Median	NaN	NaN	NaN	1	0	Median	16156000	6477900	1497900	8180000	+		+	354	1389;2644;3793;3962;7237;8343;11160;11662;11663;12788;14976	False;False;False;True;False;False;False;False;False;False;False	1439;2724;2725;3896;4069;7439;8574;8575;11555;12070;12071;13232;15504	3233;3234;3235;3236;3237;3238;3239;3240;3241;3242;3243;3244;5994;5995;5996;8429;8430;8431;8432;8433;8434;8435;8436;8437;8438;8439;8440;8441;8442;8443;8758;16205;16206;16207;19088;19089;19090;19091;19092;19093;25063;26212;26213;26214;26215;26216;26217;26218;26219;26220;26221;26222;26223;26224;26225;28711;28712;28713;28714;28715;28716;28717;28718;28719;28720;28721;28722;28723;28724;34168
CON__ENSEMBL:ENSBTAP00000038329	CON__ENSEMBL:ENSBTAP00000038329	1	1	1			>ENSEMBL:ENSBTAP00000038329 (Bos taurus) 9 kDa protein	1	1	1	1	15	15	15	8.5787	80	80	0	26.765	0.023651	0.098987	24.345	2	2	Median	0.10565	0.10255	71.543	2	2	Median	4.4671	1.1395	53.05	2	2	Median	146490000	137450000	2016700	7023900			+	355	8523	TRUE	8766	19486;19487;19488;19489
CON__P00735	CON__P00735	2	2	2			>P00735 SWISS-PROT:P00735 (Bos taurus) Prothrombin precursor (Fragment)	1	2	2	2	7.8	7.8	7.8	70.505	625	625	0	11.561	NaN	NaN	NaN	0	0	Median	NaN	NaN	NaN	0	0	Median	NaN	NaN	NaN	0	0	Median	15807000	15807000	0	0			+	356	3354;6626	True;True	3449;6814	7476;7477;14860
CON__P00761	CON__P00761	4	4	4			>P00761 SWISS-PROT:P00761|TRYP_PIG Trypsin - Sus scrofa (Pig).	1	4	4	4	25.1	25.1	25.1	24.409	231	231	0	54.34	0.08848	0.35614	121.03	123	123	Median	0.039989	0.036763	135.5	99	99	Median	0.52159	0.11333	153.6	99	99	Median	12329000000	10939000000	1211300000	178310000			+	357	6015;7739;8904;13402	True;True;True;True	6168;6169;7961;9154;13867	13461;13462;13463;13464;13465;13466;13467;13468;13469;13470;13471;17491;17492;17493;17494;17495;17496;17497;17498;17499;17500;17501;17502;17503;17504;17505;17506;17507;17508;17509;17510;17511;17512;17513;17514;17515;17516;17517;17518;17519;17520;17521;17522;17523;17524;17525;17526;17527;17528;17529;17530;17531;17532;17533;17534;17535;17536;17537;17538;17539;17540;17541;17542;17543;17544;17545;175…
CON__P00978	CON__P00978	8	8	8			>P00978 SWISS-PROT:P00978 (Bos taurus) AMBP protein precursor	1	8	8	8	25	25	25	39.234	352	352	0	46.169	0.058945	0.23874	79.7	17	17	Median	0.059271	0.056139	103.65	15	15	Median	0.72878	0.1927	58.568	15	15	Median	233660000	220400000	6384100	6872200			+	358	2779;3457;6755;6756;9261;12257;13154;14826	True;True;True;True;True;True;True;True	2864;3554;6945;6946;9525;12678;13611;15349	6281;7678;7679;7680;15107;15108;15109;15110;15111;21132;27494;27495;27496;27497;27498;27499;29553;29554;29555;29556;29557;29558;29559;33846
CON__Q2KJ62;CON__P01044-1;CON__P01045-1;P01042	CON__Q2KJ62;CON__P01044-1;CON__P01045-1	8;8;6;1	8;8;6;1	8;8;6;1			>Q2KJ62 TREMBL:Q2KJ62 (Bos taurus) KNG protein;>P01044-1 SWISS-PROT:P01044-1 (Bos taurus) Isoform HMW of Kininogen-1 precursor;>P01045-1 SWISS-PROT:P01045-1 (Bos taurus) Isoform HMW of Kininogen-2 precursor	4	8	8	8	17.1	17.1	17.1	68.964	621	621;621;619;644	0	17.669	0.21094	0.85248	76.235	7	7	Median	0.063992	0.065294	40.775	7	7	Median	0.29821	0.08455	104.91	7	7	Median	247560000	218380000	22229000	6943900			+	359	1908;7457;9367;10969;11358;11695;11810;15368	True;True;True;True;True;True;True;True	1967;7673;9643;11356;11763;12103;12222;15912	4438;16766;16767;16768;21354;21355;24690;25469;26277;26539;35101
CON__P01966;G3V1N2;P69905	CON__P01966;G3V1N2;P69905	6;3;3	6;3;3	6;3;3	Hemoglobin subunit alpha	HBA2;HBA1	>P01966 SWISS-PROT:P01966 (Bos taurus) Hemoglobin subunit alpha;>tr|G3V1N2|G3V1N2_HUMAN HCG1745306, isoform CRA_a OS=Homo sapiens GN=HBA2 PE=1 SV=1;>sp|P69905|HBA_HUMAN Hemoglobin subunit alpha OS=Homo sapiens GN=HBA1 PE=1 SV=2	3	6	6	6	58.5	58.5	58.5	15.184	142	142;110;142	0	30.87	0.079221	0.33107	163.57	20	20	Median	0.031178	0.030343	152.67	11	11	Median	0.74804	0.1673	142.55	11	11	Median	713740000	678270000	29940000	5533300			+	360	1693;3775;8773;9441;13274;13720	True;True;True;True;True;True	1749;3878;9021;9736;9737;13737;14194	3954;3955;3956;3957;3958;3959;3960;8398;20020;20021;20022;20023;21522;21523;21524;21525;21526;29825;29826;29827;29828;30937;30938;30939;30940;30941;30942;30943;30944
CON__P02070;A8MUF7;F8W6P5;E9PEW8;E9PBW4;P69892;P69891;P02100	CON__P02070	5;1;1;1;1;1;1;1	1;0;0;0;0;0;0;0	1;0;0;0;0;0;0;0			>P02070 SWISS-PROT:P02070 (Bos taurus) Hemoglobin subunit beta	8	5	1	1	32.4	8.3	8.3	15.954	145	145;87;90;104;137;147;147;147	0	5.9379	NaN	NaN	NaN	1	1	Median	NaN	NaN	NaN	0	0	Median	NaN	NaN	NaN	0	0	Median	4756000	4362000	175420	218490			+	361	8224;8395;13462;13952;14623	False;False;False;False;True	8454;8628;13928;14440;15138	18777;18778;18779;18780;18781;18782;18783;18784;18785;18786;19202;19203;19204;19205;19206;19207;19208;19209;19210;19211;19212;19213;19214;19215;19216;19217;30302;30303;30304;31664;31665;31666;31667;31668;31669;33393
CON__P02533;P02533;CON__P08779;P08779;CON__Q04695;CON__Q9QWL7;CON__Q6IFX2;CON__A2A4G1;Q04695;K7EPJ9;F5GWP8;K7ESE1;K7EMS3;C9JTG5;A8MT21	CON__P02533;P02533;CON__P08779;P08779;CON__Q04695;CON__Q9QWL7;CON__Q6IFX2;CON__A2A4G1;Q04695	7;7;5;5;4;4;4;4;4;3;3;1;1;1;1	4;4;2;2;2;2;3;1;2;1;2;1;1;1;1	2;2;0;0;1;1;1;0;1;0;1;1;0;0;0	Keratin, type I cytoskeletal 14;Keratin, type I cytoskeletal 16;Keratin, type I cytoskeletal 17	KRT14;KRT16;KRT17	>P02533 SWISS-PROT:P02533 Tax_Id=9606 Gene_Symbol=KRT14 Keratin, type I cytoskeletal 14;>sp|P02533|K1C14_HUMAN Keratin, type I cytoskeletal 14 OS=Homo sapiens GN=KRT14 PE=1 SV=4;>P08779 SWISS-PROT:P08779 Tax_Id=9606 Gene_Symbol=KRT16 Keratin, type I cytosk	15	7	4	2	14.6	9.3	4.9	51.621	472	472;472;473;473;432;433;452;456;432;231;349;95;181;220;291	0	12.334	0.080247	0.34334	213.55	5	5	Median	0.47057	0.62013	99.543	5	5	Median	2.698	0.8847	153.35	5	5	Median	31900000	13285000	14393000	4222500			+	362	907;3362;7258;7422;12730;13995;14572	True;True;False;False;True;True;False	940;3457;7464;7636;13170;14485;15084;15085	2082;2083;7499;16254;16255;16256;16257;16258;16259;16260;16667;16668;16669;16670;16671;16672;16673;16674;16675;16676;16677;28588;31772;31773;31774;31775;33254;33255;33256;33257;33258;33259;33260;33261;33262;33263;33264;33265;33266;33267;33268;33269;33270
CON__P02538;P02538;CON__P48668;CON__P04259;P48668	CON__P02538;P02538;CON__P48668;CON__P04259;P48668	14;14;13;13;13	5;5;4;4;4	1;1;0;0;0	Keratin, type II cytoskeletal 6A;Keratin, type II cytoskeletal 6C	KRT6A;KRT6C	>P02538 SWISS-PROT:P02538 Tax_Id=9606 Gene_Symbol=KRT6A Keratin, type II cytoskeletal 6A;>sp|P02538|K2C6A_HUMAN Keratin, type II cytoskeletal 6A OS=Homo sapiens GN=KRT6A PE=1 SV=3;>P48668 SWISS-PROT:P48668 Tax_Id=9606 Gene_Symbol=KRT6C Keratin, type II cyt	5	14	5	1	20.4	10.1	1.8	60.044	564	564;564;564;564;564	0	7.91	0.56528	2.2857	107.11	3	2	Plateau	0.65541	0.62784	2.2136	2	1	Median	1.3638	0.35309	30.889	2	1	Median	23374000	10601000	6468200	6304600			+	363	329;1389;3468;3531;3532;7049;8161;9938;9953;10567;10643;11328;14891;14976	True;False;False;False;False;False;False;False;False;True;True;True;True;False	339;1439;3565;3628;3629;7246;8391;10291;10307;10948;11026;11732;15418;15504	651;3233;3234;3235;3236;3237;3238;3239;3240;3241;3242;3243;3244;7713;7714;7849;7850;7851;7852;7853;7854;7855;7856;7857;7858;7859;7860;7861;7862;7863;15686;18649;18650;22531;22532;22533;22571;22572;22573;22574;22575;22576;22577;22578;22579;22580;22581;22582;22583;22584;22585;22586;22587;22588;23797;23955;25412;33993;33994;34168
CON__P02662	CON__P02662	3	3	3			>P02662 SWISS-PROT:P02662 Alpha-S1-casein - Bos taurus (Bovine).	1	3	3	3	16.6	16.6	16.6	22.975	199	199	0	6.068	0.12707	0.54772	114.12	6	6	Median	0.20585	0.20631	75.998	5	5	Median	1.1107	0.26441	122.38	5	5	Median	22616000	20676000	999280	940900			+	364	3633;5342;15196	True;True;True	3730;5479;15727	8041;8042;8043;8044;8045;8046;8047;8048;8049;8050;11774;34687;34688
CON__P02663	CON__P02663	4	4	4			>P02663 SWISS-PROT:P02663 Alpha-S2-casein [Contains: Casocidin-1 - Bos taurus (Bovine).	1	4	4	4	16.4	16.4	16.4	24.348	207	207	0	2.1695	NaN	NaN	NaN	1	1	Median	NaN	NaN	NaN	1	1	Median	NaN	NaN	NaN	1	1	Median	7271700	7218900	30174	22583			+	365	1150;3516;12729;13249	True;True;True;True	1193;3613;13169;13711	2695;7820;7821;28587;29788
CON__P02666	CON__P02666	2	2	2			>P02666 SWISS-PROT:P02666 Beta-casein - Bos taurus (Bovine).	1	2	2	2	12.9	12.9	12.9	23.583	209	209	0	5.2497	NaN	NaN	NaN	0	0	Median	NaN	NaN	NaN	0	0	Median	NaN	NaN	NaN	0	0	Median	4887100	4887100	0	0			+	366	2417;13911	True;True	2490;2491;14395	5476;5477;31539
CON__P02668	CON__P02668	2	2	2			>P02668 SWISS-PROT:P02668 Kappa-casein [Contains: Casoxin C; Casoxin 6; Casoxin A; Casoxin B; Casoplatelin] - Bos taurus (Bovine).	1	2	2	2	16.6	16.6	16.6	18.974	169	169	0	8.9263	0.14293	0.49845	73.305	2	2	Median	0.15266	0.12199	1.2775	2	2	Median	1.0681	0.24244	75.959	2	2	Median	6628300	5692700	472210	463410			+	367	11806;15132	True;True	12218;15663	26533;34550;34551;34552;34553
CON__P02754	CON__P02754	5	5	5			>P02754 SWISS-PROT:P02754 Beta-lactoglobulin - Bos taurus (Bovine).	1	5	5	5	33.3	33.3	33.3	18.281	162	162	0	11.042	0.44694	1.9122	31.396	3	3	Median	0.060884	0.063035	30.121	2	2	Median	0.15845	0.041782	70.274	2	2	Median	12963000	11491000	1167200	305370			+	368	5647;7998;8831;12928;14189	True;True;True;True;True	5792;8227;9080;13382;14686	12615;18189;20132;20133;29086;29087;29088;32250
CON__P02769	CON__P02769	80	80	74			>P02769 SWISS-PROT:P02769 (Bos taurus) Bovine serum albumin precursor	1	80	80	74	88.1	88.1	84.5	69.293	607	607	0	323.31	0.049824	0.19141	122.15	902	902	Median	0.041909	0.042324	133.19	730	730	Median	0.90461	0.22995	118.34	730	730	Median	135380000000	131590000000	2058800000	1729100000			+	369	369;370;461;462;979;1558;1559;1893;1896;1897;1898;2007;2008;2026;2072;2073;2078;2325;2540;2774;2775;2776;3355;3458;3459;3460;3754;4148;4794;5385;5386;5406;5414;7140;7217;7346;7347;7482;7483;7484;7690;7691;7692;7748;8018;8043;8058;8059;8890;8891;9157;9210;9224;9572;9781;10343;10344;10354;10461;10637;10638;10704;10872;10874;10959;11398;11617;12375;12974;13208;13209;13392;13794;13795;14322;15118;152…	True;True;True;True;True;True;True;True;True;True;True;True;True;True;True;True;True;True;True;True;True;True;True;True;True;True;True;True;True;True;True;True;True;True;True;True;True;True;True;True;True;True;True;True;True;True;True;True;True;True;True;True;True;True;True;True;True;True;True;True;True;True;True;True;True;True;True;True;True;True;True;True;True;True;True;True;True;True;True;True	382;383;478;479;1012;1612;1613;1951;1954;1955;1956;2071;2072;2091;2138;2139;2144;2394;2619;2859;2860;2861;3450;3555;3556;3557;3853;4259;4920;5523;5524;5544;5553;7339;7419;7556;7557;7698;7699;7700;7912;7913;7914;7971;8247;8272;8287;8288;9140;9141;9417;9472;9487;9893;9894;10130;10715;10716;10726;10840;11020;11021;11087;11256;11258;11346;11804;12025;12801;13428;13665;13666;13667;13668;13856;14270;14…	749;750;751;752;753;754;755;756;757;758;759;760;761;762;763;764;765;766;767;768;769;770;771;772;773;774;775;776;777;778;779;780;781;782;966;967;968;969;970;971;972;973;974;975;976;977;978;979;980;981;982;983;984;985;986;987;988;989;990;991;992;993;994;995;996;997;2250;2251;2252;2253;3652;3653;3654;3655;3656;3657;3658;3659;4369;4370;4371;4372;4373;4374;4375;4376;4377;4378;4379;4380;4381;4382;4383;…
CON__P02777	CON__P02777	4	4	4			>P02777 SWISS-PROT:P02777 (Bos taurus) similar to Platelet factor 4	1	4	4	4	16.1	16.1	16.1	24.241	230	230	0	12.565	0.14185	0.5956	43.562	3	3	Median	0.058932	0.059337	36.47	2	2	Median	0.38093	0.092755	48.736	2	2	Median	41396000	39400000	1428500	566880			+	370	5343;5631;6948;6949	True;True;True;True	5480;5776;7145;7146	11775;11776;12578;15505;15506
CON__P05787;P05787;F8VUG2;CON__H-INV:HIT000292931;F8W1U3;F8VP67;F8VRG4;CON__Q9H552;CON__H-INV:HIT000016045;CON__Q9NSB2;CON__Q6ISB0;Q9NSB2;F8VQY3;Q8IWY7;CON__REFSEQ:XP_092267;K7EJU1;CON__Q6KB66-1;P14136;Q6KB66	CON__P05787;P05787;F8VUG2	37;37;19;18;16;12;9;7;4;3;3;3;2;2;1;1;1;1;1	36;36;19;18;16;12;9;6;4;2;2;2;2;2;1;1;1;1;1	29;29;14;16;12;10;7;5;2;0;0;0;2;1;1;0;0;0;0	Keratin, type II cytoskeletal 8	KRT8	>P05787 SWISS-PROT:P05787 Tax_Id=9606 Gene_Symbol=KRT8 Keratin, type II cytoskeletal 8;>sp|P05787|K2C8_HUMAN Keratin, type II cytoskeletal 8 OS=Homo sapiens GN=KRT8 PE=1 SV=7;>tr|F8VUG2|F8VUG2_HUMAN Keratin, type II cytoskeletal 8 (Fragment) OS=Homo sapien	19	37	36	29	66.3	66.3	58.2	53.704	483	483;483;273;443;289;113;177;499;99;600;600;600;180;1649;213;248;452;432;452	0	222.04	0.25842	1.0916	15.415	48	0	Median	0.87501	0.86914	15.923	48	0	Median	3.3379	0.83082	18.537	48	0	Median	6606100000	3016000000	921070000	2669000000			+	371	345;1385;1474;1475;1476;2574;2575;3468;3531;3532;4482;6511;7051;7352;7583;8166;8167;8603;8604;8819;9197;9938;10576;10611;10624;10986;11562;11769;11770;11942;11943;12431;12438;12439;14878;14976;14985	True;True;True;True;True;True;True;True;True;True;True;True;True;True;True;False;True;True;True;True;True;True;True;True;True;True;True;True;True;True;True;True;True;True;True;True;True	355;1435;1526;1527;1528;2653;2654;3565;3628;3629;4603;6696;7248;7562;7803;8396;8397;8847;8848;9068;9458;10291;10957;10992;11005;11373;11970;12181;12182;12356;12357;12860;12868;12869;12870;15404;15504;15513	683;3213;3214;3215;3481;3482;3483;3484;3485;3486;3487;5845;5846;5847;7713;7714;7849;7850;7851;7852;7853;7854;7855;7856;7857;7858;7859;7860;7861;7862;7863;9870;14634;14635;15688;16472;17128;18659;18660;18661;18662;18663;19665;19666;19667;19668;19669;19670;19671;19672;20099;20100;20101;20954;20955;20956;22531;22532;22533;23815;23901;23922;24723;25952;25953;25954;26460;26461;26834;26835;26836;27890;…
CON__P06868;P00747	CON__P06868	20;2	20;2	20;2			>P06868 SWISS-PROT:P06868 (Bos taurus) Plasminogen precursor	2	20	20	20	28.7	28.7	28.7	91.215	812	812;810	0	45.494	0.13618	0.57878	87.386	18	18	Median	0.095075	0.094117	95.365	15	15	Median	1.194	0.29555	117.81	15	15	Median	160550000	143480000	11818000	5243700			+	372	1284;2702;3240;3243;3399;5294;7684;8896;9961;10090;10330;12147;12922;12924;13443;14419;14427;14481;14819;14875	True;True;True;True;True;True;True;True;True;True;True;True;True;True;True;True;True;True;True;True	1332;2784;3334;3337;3496;5431;7906;9146;10316;10453;10702;12564;13376;13378;13908;14928;14936;14992;15342;15401	2962;6112;6113;7204;7207;7208;7566;7567;11692;11693;17323;17324;17325;20278;22605;22606;22906;22907;23348;23349;27272;27273;29076;29077;29079;30274;32826;32843;32974;33835;33836;33966;33967
CON__P07744	CON__P07744	5	1	1			>P07744 SWISS-PROT:P07744 Tax_Id=10090 Gene_Symbol=Krt4 Keratin, type II cytoskeletal 4	1	5	1	1	5	1.5	1.5	56.283	525	525	0.008348	0.91495	0.21418	0.81571	15.769	3	0	Median	0.80423	0.80289	10.841	3	0	Median	3.7665	1.0008	5.7112	3	0	Median	430860000	198740000	53032000	179080000			+	373	1387;3531;3532;7049;8161	True;False;False;False;False	1437;3628;3629;7246;8391	3229;3230;3231;7849;7850;7851;7852;7853;7854;7855;7856;7857;7858;7859;7860;7861;7862;7863;15686;18649;18650
CON__P12763;P02765;C9JV77	CON__P12763	18;4;2	18;4;2	18;4;2			>P12763 SWISS-PROT:P12763 (Bos taurus) Alpha-2-HS-glycoprotein precursor	3	18	18	18	40.7	40.7	40.7	38.418	359	359;367;368	0	139.54	0.11229	0.45109	104.22	193	193	Median	0.041778	0.041676	116.51	114	114	Median	0.52845	0.13163	124.04	114	114	Median	14669000000	13985000000	468190000	215820000			+	374	950;1322;1323;1910;1911;1957;1958;3438;3439;5229;5230;5465;5469;5470;10437;10679;10680;12940	True;True;True;True;True;True;True;True;True;True;True;True;True;True;True;True;True;True	983;1371;1372;1969;1970;2018;2019;3535;3536;5366;5367;5606;5611;5612;10815;11062;11063;13394	2199;2200;2201;2202;3036;3037;3038;3039;3040;3041;3042;3043;3044;3045;3046;3047;3048;3049;3050;3051;3052;3053;3054;3055;3056;3057;3058;3059;3060;3061;3062;3063;3064;3065;3066;3067;3068;3069;3070;3071;3072;3073;3074;3075;3076;3077;3078;3079;3080;3081;3082;3083;3084;3085;3086;3087;3088;3089;3090;3091;3092;3093;3094;3095;3096;4440;4441;4442;4443;4444;4515;4516;4517;4518;4519;7625;7626;7627;7628;7629…
CON__P13645;P13645;CON__P02535-1;CON__P08730-1;CON__Q148H6;CON__Q7Z3Y7;Q7Z3Y7;CON__Q7Z3Z0;CON__Q7Z3Y8;CON__Q9Z2K1;CON__Q3ZAW8;CON__Q2M2I5;Q7Z3Z0;Q7Z3Y8;Q2M2I5;CON__Q14525;A0A087X2I6;CON__Q9UE12;CON__Q15323;CON__A2A5Y0;CON__Q92764;C4AM86;CON__Q14532;CON__A2AB72;CON__Q497I4;CON__O76013;CON__Q7Z3Y9;CON__REFSEQ:XP_986630;CON__Q99456;Q14525;Q15323;Q14532;Q92764;O76013;Q7Z3Y9;Q99456	CON__P13645;P13645	28;28;9;4;3;3;3;2;2;2;2;2;2;2;2;1;1;1;1;1;1;1;1;1;1;1;1;1;1;1;1;1;1;1;1;1	27;27;8;3;2;2;2;2;2;1;1;1;2;2;1;0;0;0;0;0;0;0;0;0;0;0;1;0;1;0;0;0;0;0;1;1	23;23;5;0;1;1;1;1;1;0;0;0;1;1;0;0;0;0;0;0;0;0;0;0;0;0;0;0;0;0;0;0;0;0;0;0	Keratin, type I cytoskeletal 10	KRT10	>P13645 SWISS-PROT:P13645 Tax_Id=9606 Gene_Symbol=KRT10 Keratin, type I cytoskeletal 10;>sp|P13645|K1C10_HUMAN Keratin, type I cytoskeletal 10 OS=Homo sapiens GN=KRT10 PE=1 SV=6	36	28	27	23	48.7	47.6	42.7	59.51	593	593;584;570;437;464;486;464;450;459;469;474;525;450;459;525;404;404;416;416;416;425;425;448;453;455;467;468;476;494;404;416;448;455;467;468;494	0	146.52	0.079163	0.32668	105.65	82	82	Median	0.05993	0.063544	104.18	69	69	Median	0.85994	0.21012	124.58	69	69	Median	713340000	655970000	31050000	26327000			+	375	307;431;910;2002;3148;5000;6417;7258;7422;7602;8085;9858;10295;10307;10690;10698;10699;11018;11212;11213;11513;11631;11939;11940;12633;13996;14572;14998	True;True;True;True;True;True;True;False;True;True;True;True;True;True;True;True;True;True;True;True;True;True;True;True;True;True;True;True	316;317;448;943;2066;3241;5132;6593;7464;7636;7822;8314;10210;10666;10678;10679;11073;11081;11082;11410;11607;11608;11921;12039;12353;12354;13070;14486;15084;15085;15526	595;596;597;909;910;2088;2089;2090;2091;2092;2093;2094;2095;2096;2097;2098;2099;2100;4594;4595;4596;4597;4598;4599;4600;4601;7048;7049;11079;11080;11081;11082;11083;14372;14373;14374;14375;14376;14377;14378;16254;16255;16256;16257;16258;16259;16260;16667;16668;16669;16670;16671;16672;16673;16674;16675;16676;16677;17161;17162;17163;17164;17165;17166;17167;18473;18474;18475;18476;18477;18478;18479;…
CON__P13647;P13647;F8W0C6;CON__Q8VED5;H0YI76;H0YIN9;F8VV57	CON__P13647;P13647;F8W0C6	12;12;7;5;4;3;1	2;2;0;0;1;1;1	2;2;0;0;1;1;1	Keratin, type II cytoskeletal 5	KRT5	>P13647 SWISS-PROT:P13647 Tax_Id=9606 Gene_Symbol=KRT5 Keratin, type II cytoskeletal 5;>sp|P13647|K2C5_HUMAN Keratin, type II cytoskeletal 5 OS=Homo sapiens GN=KRT5 PE=1 SV=3;>tr|F8W0C6|F8W0C6_HUMAN Keratin, type II cytoskeletal 5 (Fragment) OS=Homo sapien	7	12	2	2	16.1	3.4	3.4	62.378	590	590;590;179;531;201;196;132	0	2.1266	NaN	NaN	NaN	1	1	Median	NaN	NaN	NaN	1	1	Median	NaN	NaN	NaN	1	1	Median	2842200	2712900	64943	64361			+	376	1388;3531;3532;6464;7049;8161;9938;9953;10567;10643;14891;14976	True;False;False;True;False;False;False;False;False;False;False;False	1438;3628;3629;6641;7246;8391;10291;10307;10948;11026;15418;15504	3232;7849;7850;7851;7852;7853;7854;7855;7856;7857;7858;7859;7860;7861;7862;7863;14514;14515;15686;18649;18650;22531;22532;22533;22571;22572;22573;22574;22575;22576;22577;22578;22579;22580;22581;22582;22583;22584;22585;22586;22587;22588;23797;23955;33993;33994;34168
CON__P15497;F8W696;P02647	CON__P15497	15;1;1	15;1;1	15;1;1			>P15497 SWISS-PROT:P15497 (Bos taurus) Apolipoprotein A-I precursor	3	15	15	15	53.6	53.6	53.6	30.276	265	265;245;267	0	39.774	0.047381	0.18161	100.99	16	16	Median	0.10378	0.10504	155.44	13	13	Median	1.5169	0.38204	134.44	13	13	Median	341340000	308270000	8549600	24518000			+	377	825;2652;2857;3231;7557;8131;8883;10493;10668;13375;14361;14393;14394;14465;14466	True;True;True;True;True;True;True;True;True;True;True;True;True;True;True	857;2734;2944;3325;7777;8361;9133;10874;11051;13839;14868;14901;14902;14975;14976	1903;6008;6425;7184;17076;17077;17078;18582;18583;18584;20263;23679;23988;30086;32728;32774;32775;32776;32947;32948;32949;32950
CON__P17690	CON__P17690	7	7	7			>P17690 SWISS-PROT:P17690 (Bos taurus) Beta-2-glycoprotein 1 precursor	1	7	7	7	30.1	30.1	30.1	38.252	345	345	0	64.165	0.057511	0.23074	91.713	11	11	Median	0.077341	0.075512	94.799	8	8	Median	1.1232	0.30944	98.346	8	8	Median	298910000	259700000	20706000	18499000			+	378	1638;2533;4018;6811;10809;12369;13272	True;True;True;True;True;True;True	1692;2612;4128;7002;11192;12795;13735	3808;3809;5749;8882;8883;8884;15222;24277;27738;27739;27740;29821;29822;29823
CON__P28800;C9JMH6;P08697	CON__P28800	5;1;1	5;1;1	5;1;1			>P28800 SWISS-PROT:P28800 (Bos taurus) Alpha-2-antiplasmin precursor	3	5	5	5	12.8	12.8	12.8	54.71	492	492;255;491	0	10.467	0.072444	0.2926	73.078	6	6	Median	0.082338	0.082022	71.77	4	4	Median	1.1595	0.28689	123.23	4	4	Median	210670000	199010000	7302900	4354300			+	379	4287;7472;7529;8034;11517	True;True;True;True;True	4401;7688;7749;8263;11925	9425;16806;16807;16808;16809;17021;17022;17023;17024;18339;18340;18341;25846;25847;25848
CON__P34955	CON__P34955	20	20	20			>P34955 SWISS-PROT:P34955 (Bos taurus) Alpha-1-antiproteinase precursor	1	20	20	20	41.1	41.1	41.1	46.103	416	416	0	122.31	0.072785	0.28236	122.61	156	156	Median	0.044631	0.04476	158.66	125	125	Median	0.84156	0.21125	135.31	125	125	Median	10721000000	10333000000	226980000	161220000			+	380	129;313;2091;2092;4652;5472;6250;6967;7233;7816;8708;8851;9068;9069;10049;11833;12181;12182;14008;14936	True;True;True;True;True;True;True;True;True;True;True;True;True;True;True;True;True;True;True;True	132;323;2157;2158;2159;4777;4778;5615;6421;7164;7435;8039;8040;8955;9100;9326;9327;10408;12246;12601;12602;14499;15464	227;228;229;230;627;628;629;4835;4836;4837;4838;4839;4840;4841;4842;4843;4844;4845;10264;10265;10266;10267;10268;10269;10270;10271;10272;12267;12268;12269;12270;12271;12272;12273;12274;14012;14013;14014;14015;14016;14017;15528;16191;16192;16193;16194;16195;16196;16197;16198;17737;17738;17739;17740;17741;17742;19877;19878;19879;19880;19881;19882;19883;19884;19885;20186;20187;20188;20189;20190;2019…
CON__P35908;P35908;Q01546;CON__Q01546;CON__P12035;P12035;CON__Q7RTS7;CON__Q32MB2;F8W1S1;CON__Q7Z794;Q7RTS7;Q86Y46;Q7Z794;CON__Q9R0H5;H0YID6;H0YIC5;CON__Q3SY84;Q3SY84;H0YHD9;F8VS61;CON__Q8N1N4-2;CON__Q7RTT2;Q8N1N4	CON__P35908;P35908	30;30;9;8;6;6;4;4;4;4;4;4;4;3;2;2;2;2;1;1;1;1;1	25;25;6;5;3;3;2;2;2;0;2;2;0;0;2;2;0;0;0;0;1;1;1	16;16;0;0;0;0;0;0;0;0;0;0;0;0;0;0;0;0;0;0;0;0;0	Keratin, type II cytoskeletal 2 epidermal	KRT2	>P35908 SWISS-PROT:P35908 Tax_Id=9606 Gene_Symbol=KRT2 Keratin, type II cytoskeletal 2 epidermal;>sp|P35908|K22E_HUMAN Keratin, type II cytoskeletal 2 epidermal OS=Homo sapiens GN=KRT2 PE=1 SV=2	23	30	25	16	42.6	39.4	27.9	65.865	645	645;639;638;638;629;628;529;540;543;578;529;540;578;524;119;285;523;523;143;248;521;521;520	0	75.708	0.27699	1.0711	9.3944	3	0	Median	0.46363	0.45913	63.751	3	0	Median	1.5904	0.40223	57.609	3	0	Median	454030000	362790000	35344000	55889000			+	381	67;1389;2580;2645;2945;3531;3532;3793;4432;4500;5730;7049;7237;8161;8344;8656;9953;10296;11482;11511;11710;12117;12277;12278;13067;13502;13509;14976;14986;15179	True;True;True;True;True;False;False;False;True;True;False;True;True;True;True;True;True;True;True;True;True;True;True;True;True;True;True;False;True;True	69;1439;2660;2726;2727;3035;3628;3629;3896;4550;4621;5877;7246;7439;8391;8576;8901;10307;10667;11890;11919;12118;12534;12700;12701;13521;13968;13975;15504;15514;15710	108;3233;3234;3235;3236;3237;3238;3239;3240;3241;3242;3243;3244;5863;5864;5865;5866;5997;5998;5999;6000;6652;7849;7850;7851;7852;7853;7854;7855;7856;7857;7858;7859;7860;7861;7862;7863;8429;8430;8431;8432;8433;8434;8435;8436;8437;8438;8439;8440;8441;8442;8443;9762;9763;9764;9765;9766;9907;9908;9909;9910;12782;12783;12784;12785;12786;12787;12788;12789;12790;15686;16205;16206;16207;18649;18650;19094…
CON__P41361;Q8TCE1;P01008	CON__P41361	12;2;2	12;2;2	12;2;2			>P41361 SWISS-PROT:P41361 (Bos taurus) Antithrombin-III precursor	3	12	12	12	31.8	31.8	31.8	52.347	465	465;259;464	0	36.262	0.060639	0.24606	104.42	20	20	Median	0.086059	0.08781	79.847	12	12	Median	1.7245	0.43369	111.67	12	12	Median	379200000	348730000	15509000	14964000			+	382	1561;2222;3233;3360;6795;8700;11028;11147;11869;11950;13037;13330	True;True;True;True;True;True;True;True;True;True;True;True	1615;2291;3327;3455;6986;8947;11420;11542;12283;12364;13491;13793	3661;3662;3663;3664;5086;5087;7187;7188;7189;7489;15195;15196;15197;19854;24798;24799;25038;25039;25040;25041;25042;26686;26687;26688;26851;26852;29320;29321;29322;29933
CON__P50448	CON__P50448	3	3	3			>P50448 SWISS-PROT:P50448 (Bos taurus) Factor XIIa inhibitor precursor	1	3	3	3	8.1	8.1	8.1	51.723	468	468	0	18.259	0.10916	0.42797	109.57	5	5	Median	0.12432	0.12213	4.1207	2	2	Median	1.1975	0.30484	29.5	2	2	Median	77058000	72606000	2916100	1536100			+	383	7954;8136;11049	True;True;True	8180;8366;11441	18052;18594;18595;24833;24834;24835;24836;24837
CON__P67983;Q8N339;P80297;P04732;P02795;P13640	CON__P67983;Q8N339;P80297;P04732;P02795;P13640	1;1;1;1;1;1	1;1;1;1;1;1	1;1;1;1;1;1	Metallothionein-1M;Metallothionein-1X;Metallothionein-1E;Metallothionein-2;Metallothionein-1G	MT1M;MT1X;MT1E;MT2A;MT1G	>P67983 SWISS-PROT:P67983 (Bos taurus) Metallothionein-1A;>sp|Q8N339|MT1M_HUMAN Metallothionein-1M OS=Homo sapiens GN=MT1M PE=3 SV=2;>sp|P80297|MT1X_HUMAN Metallothionein-1X OS=Homo sapiens GN=MT1X PE=1 SV=1;>sp|P04732|MT1E_HUMAN Metallothionein-1E OS=Homo	6	1	1	1	19.7	19.7	19.7	5.9511	61	61;61;61;61;61;62	0	5.735	0.14535	0.62697	11.765	4	4	Median	0.75613	0.74641	3.8757	4	4	Median	5.2595	1.2136	13.836	4	4	Median	13513000	7194200	1102400	5215900			+	384	11111	TRUE	11506	24969;24970;24971;24972
CON__P81644	CON__P81644	2	2	2			>P81644 SWISS-PROT:P81644 (Bos taurus) Apolipoprotein A-II precursor	1	2	2	2	27	27	27	11.202	100	100	0	9.3131	NaN	NaN	NaN	0	0	Median	NaN	NaN	NaN	0	0	Median	NaN	NaN	NaN	0	0	Median	4021000	4021000	0	0			+	385	640;12986	True;True	665;13440	1450;29214
CON__Q03247;P02649	CON__Q03247;P02649	2;1	2;1	2;1	Apolipoprotein E	APOE	>Q03247 SWISS-PROT:Q03247 (Bos taurus) Apolipoprotein E precursor;>sp|P02649|APOE_HUMAN Apolipoprotein E OS=Homo sapiens GN=APOE PE=1 SV=1	2	2	2	2	7.3	7.3	7.3	35.979	316	316;317	0	7.7784	NaN	NaN	NaN	1	1	Median	NaN	NaN	NaN	1	1	Median	NaN	NaN	NaN	1	1	Median	24708000	17494000	1474900	5738700			+	386	7447;8598	True;True	7662;8842	16742;16743;19651
CON__Q05B55	CON__Q05B55	2	2	2			>Q05B55 TREMBL:Q05B55 (Bos taurus) Similar to Ig kappa chain C region	1	2	2	2	14.2	14.2	14.2	26.59	240	240	0	5.5623	0.093994	0.35535	25.219	3	3	Median	0.55079	0.56497	112.6	3	3	Plateau	6.1935	1.8033	134.39	3	3	Plateau	21475000	14674000	1247600	5553500			+	387	11130;12577	True;True	11525;13012	25011;28192;28193
CON__Q0IIK2;CON__Q29443;CON__Q2HJF0;E7EQB2;E7ER44;P02788;H7C5E8;P02787	CON__Q0IIK2;CON__Q29443	72;71;3;3;3;3;2;2	72;71;3;3;3;3;2;2	72;71;3;3;3;3;2;2			>Q0IIK2 TREMBL:Q0IIK2 (Bos taurus) Transferrin;>Q29443 SWISS-PROT:Q29443 Serotransferrin - Bos taurus (Bovine).	8	72	72	72	82.5	82.5	82.5	77.738	704	704;685;622;696;708;710;143;698	0	323.31	0.067275	0.26772	113.27	242	242	Median	0.038136	0.039388	135.68	183	183	Median	0.73131	0.17578	110.09	183	183	Median	14147000000	13363000000	492130000	291660000			+	388	22;779;1887;1890;1925;1926;1947;1949;1950;2155;2261;2262;2349;2350;2351;2439;2440;2477;2488;2489;2534;3110;3188;3189;3286;3564;4306;4307;4322;4895;5035;5231;5457;5458;5459;6117;6118;6168;6233;6269;6831;6852;7100;7101;7123;7160;7183;7475;7476;8147;9270;9988;10233;10328;10329;11066;11120;12138;12214;12215;12216;12305;12425;13032;13033;13034;13180;13270;14809;14813;14877;15458	True;True;True;True;True;True;True;True;True;True;True;True;True;True;True;True;True;True;True;True;True;True;True;True;True;True;True;True;True;True;True;True;True;True;True;True;True;True;True;True;True;True;True;True;True;True;True;True;True;True;True;True;True;True;True;True;True;True;True;True;True;True;True;True;True;True;True;True;True;True;True;True	24;809;1945;1948;1984;1985;2006;2007;2009;2010;2223;2330;2331;2418;2419;2420;2513;2514;2555;2566;2567;2613;3203;3282;3283;3380;3381;3661;4420;4421;4436;4437;5025;5167;5368;5598;5599;5600;6274;6275;6328;6397;6398;6440;7024;7046;7298;7299;7321;7360;7385;7691;7692;8377;9534;10344;10602;10700;10701;11458;11459;11515;12555;12634;12635;12636;12728;12729;12854;13486;13487;13488;13637;13733;15332;15336;1…	33;34;35;36;37;38;39;40;41;42;43;1806;4358;4359;4360;4363;4364;4365;4366;4462;4463;4464;4497;4498;4499;4500;4502;4503;4504;4969;4970;4971;4972;4973;4974;4975;4976;5165;5166;5167;5168;5169;5170;5171;5172;5173;5342;5343;5344;5345;5346;5347;5528;5529;5530;5531;5532;5533;5534;5535;5536;5537;5538;5612;5613;5630;5631;5632;5633;5634;5750;5751;5752;5753;6984;6985;6986;7108;7109;7110;7111;7112;7113;7286;7…
CON__Q0V8M9;A0A087WW43;E7ET33;Q06033	CON__Q0V8M9	10;2;2;2	10;2;2;2	10;2;2;2			>Q0V8M9 TREMBL:Q0V8M9;Q9TRI0 (Bos taurus) similar to inter-alpha (globulin) inhibitor H3 isoform 2	4	10	10	10	12.3	12.3	12.3	99.536	891	891;670;698;890	0	15.401	0.12416	0.48615	79.262	19	19	Median	0.14357	0.13916	44.415	17	17	Median	0.72919	0.20113	77.074	17	17	Median	99218000	80756000	11350000	7112000			+	389	1053;2634;3429;3507;4278;4820;7286;9727;11123;14537	True;True;True;True;True;True;True;True;True;True	1090;2714;3526;3604;4392;4948;7492;10075;11518;15048	2463;2464;2465;5973;5974;7610;7611;7612;7613;7614;7801;7802;9408;9409;10682;10683;10684;10685;16338;22160;22161;24996;33135
CON__Q0VCM5;F8WAS2;P19827	CON__Q0VCM5	4;1;1	4;1;1	4;1;1			>Q0VCM5 TREMBL:Q0VCM5 (Bos taurus) Similar to Inter-alpha-trypsin inhibitor heavy chain H1	3	4	4	4	6.7	6.7	6.7	101.24	906	906;213;911	0	10.954	NaN	NaN	NaN	1	1	Median	NaN	NaN	NaN	1	1	Median	NaN	NaN	NaN	1	1	Median	21318000	20169000	581720	567390			+	390	93;3430;5003;6712	True;True;True;True	96;3527;5135;6900	154;155;156;7615;11086;11087;15036
CON__Q1RMK2	CON__Q1RMK2	3	3	3			>Q1RMK2 TREMBL:Q1RMK2 (Bos taurus) IGHM protein	1	3	3	3	8	8	8	65.056	597	597	0	11.833	0.27762	1.0893	75.81	4	4	Median	0.12533	0.12575	37.576	4	4	Median	0.53967	0.13424	94.956	4	4	Median	14523000	11235000	2499500	788150			+	391	3268;4364;13667	True;True;True	3362;4479;14139	7249;9590;9591;9592;9593;30820
CON__Q1RMN8	CON__Q1RMN8	4	4	4			>Q1RMN8 TREMBL:Q1RMN8 (Bos taurus) Similar to Immunoglobulin lambda-like polypeptide 1	1	4	4	4	20.1	20.1	20.1	24.536	234	234	0	20.985	0.064818	0.27107	68.3	2	2	Median	NaN	NaN	NaN	1	1	Median	NaN	NaN	NaN	1	1	Median	32707000	30370000	1123700	1212900			+	392	5027;11522;14469;14906	True;True;True;True	5159;11930;14979;15433	11135;25857;25858;32954;34023;34024
CON__Q28085	CON__Q28085	12	12	12			>Q28085 SWISS-PROT:Q28085 (Bos taurus) Complement factor H precursor	1	12	12	12	13.9	13.9	13.9	140.37	1236	1236	0	23.573	0.11487	0.46891	69.15	11	11	Median	0.10324	0.097105	60.964	8	8	Median	1.0148	0.25718	72.716	8	8	Median	54616000	45116000	5632500	3867400			+	393	2167;2611;2786;3205;3748;5733;6338;11113;12231;12773;13047;15222	True;True;True;True;True;True;True;True;True;True;True;True	2235;2691;2871;3299;3847;5880;6512;11508;12651;13216;13501;15754	4996;5933;6291;7138;8286;12793;14186;24974;24975;27434;28676;29344;29345;34730;34731
CON__Q29RQ1	CON__Q29RQ1	4	4	4			>Q29RQ1 SWISS-PROT:Q29RQ1 (Bos taurus) Complement component C7 precursor	1	4	4	4	6	6	6	93.089	843	843	0	8.2887	0.18689	0.75154	31.232	4	4	Median	NaN	NaN	NaN	1	1	Median	NaN	NaN	NaN	1	1	Median	9604700	8215600	1007300	381790			+	394	3271;8839;12211;15381	True;True;True;True	3365;9088;12631;15925	7252;20163;27399;35129
E9PHK0;CON__Q2KIS7;P05452	E9PHK0;CON__Q2KIS7;P05452	2;2;2	2;2;2	2;2;2	Tetranectin	CLEC3B	>tr|E9PHK0|E9PHK0_HUMAN Tetranectin OS=Homo sapiens GN=CLEC3B PE=1 SV=1;>Q2KIS7 SWISS-PROT:Q2KIS7 (Bos taurus) Tetranectin precursor;>sp|P05452|TETN_HUMAN Tetranectin OS=Homo sapiens GN=CLEC3B PE=1 SV=3	3	2	2	2	20.6	20.6	20.6	17.794	160	160;202;202	0	16.413	NaN	NaN	NaN	1	1	Median	NaN	NaN	NaN	1	1	Median	NaN	NaN	NaN	1	1	Median	25587000	24851000	508990	226810			+	395	4505;12470	True;True	4626;12902	9918;9919;27975
CON__Q2KJF1	CON__Q2KJF1	6	6	6			>Q2KJF1 TREMBL:Q2KJF1 (Bos taurus) Alpha-1-B glycoprotein	1	6	6	6	17.3	17.3	17.3	53.553	503	503	0	26.42	0.056551	0.22423	153.21	5	5	Median	0.11194	0.10733	142.5	4	4	Median	2.0439	0.51375	79.847	4	4	Median	246250000	235470000	5311400	5467900			+	396	1126;4158;7578;8783;11648;14161	True;True;True;True;True;True	1166;4270;7798;9031;12056;14657	2607;2608;9129;17116;20037;20038;26187;26188;32200;32201
CON__Q2UVX4;P01024;M0QXZ3	CON__Q2UVX4	30;4;1	30;4;1	30;4;1			>Q2UVX4 SWISS-PROT:Q2UVX4 (Bos taurus) Complement C3 precursor	3	30	30	30	23.5	23.5	23.5	187.37	1662	1662;1663;100	0	108.88	0.12279	0.49564	101.85	36	36	Median	0.16087	0.16174	120.99	23	23	Median	1.3766	0.34032	114.84	23	23	Median	755140000	597710000	37945000	119490000			+	397	235;291;491;2458;2813;3209;3617;5004;5250;5431;5860;6158;6216;6834;6933;8594;9062;10324;10788;10982;11144;12043;12535;12864;13573;13574;13748;13802;14301;14796	True;True;True;True;True;True;True;True;True;True;True;True;True;True;True;True;True;True;True;True;True;True;True;True;True;True;True;True;True;True	240;298;508;2536;2899;3303;3714;5136;5387;5572;6011;6316;6376;7027;7130;8837;9320;10696;11171;11369;11539;12457;12969;13315;14040;14041;14222;14278;14808;15319	451;452;563;1065;1066;5576;6345;7143;8020;11088;11089;11616;12068;12069;12070;13098;13813;13814;13927;13928;13929;13930;15269;15475;19640;19641;20670;23335;24232;24714;24715;24716;24717;25033;25034;25035;27019;27020;27021;27022;27023;28112;28113;28914;30572;30573;30574;31037;31198;31199;32545;33793
CON__Q3KNV1;P08729;CON__P08729;CON__Q9DCV7;CON__Q14CN4-1;CON__Q6IME9;Q14CN4	CON__Q3KNV1;P08729;CON__P08729	25;25;24;7;3;3;3	21;21;20;3;1;1;1	19;19;18;2;1;1;1	Keratin, type II cytoskeletal 7	KRT7	>Q3KNV1 TREMBL:Q3KNV1;Q96GE1 Tax_Id=9606 Gene_Symbol=KRT7 keratin 7;>sp|P08729|K2C7_HUMAN Keratin, type II cytoskeletal 7 OS=Homo sapiens GN=KRT7 PE=1 SV=5;>P08729 SWISS-PROT:P08729 Tax_Id=9606 Gene_Symbol=KRT7 Keratin, type II cytoskeletal 7	7	25	21	19	54.4	48.2	44.1	51.385	469	469;469;469;457;511;520;511	0	114.27	0.31146	1.1963	12.897	34	0	Median	1.0338	1.0405	6.8598	34	0	Median	3.3853	0.89214	11.652	34	0	Median	3284700000	1371800000	488120000	1424700000			+	398	342;828;3436;3469;3531;3532;3597;4938;4939;7352;7489;8166;8516;8602;8897;9792;10236;11106;11442;11554;12027;12279;13449;14423;14892	True;True;True;True;False;False;True;True;True;False;True;False;True;True;True;True;True;True;True;True;True;True;True;True;True	352;860;3533;3566;3628;3629;3694;5068;5069;7562;7706;8396;8759;8846;9147;10141;10142;10605;10606;11501;11848;11962;12441;12702;13915;14932;15419	675;1906;1907;7622;7623;7715;7849;7850;7851;7852;7853;7854;7855;7856;7857;7858;7859;7860;7861;7862;7863;7988;10935;10936;16472;16901;18659;18660;18661;19471;19472;19473;19661;19662;19663;19664;20279;20280;22276;22277;23184;23185;23186;24962;25646;25647;25648;25649;25914;25915;26996;26997;27555;27556;27557;30284;32832;32833;33995;33996
CON__Q3KUS7	CON__Q3KUS7	10	10	10			>Q3KUS7 TREMBL:Q3KUS7 (Bos taurus) Complement factor B	1	10	10	10	17.1	17.1	17.1	85.411	760	760	0	18.25	0.15969	0.66337	56.395	10	10	Median	0.099475	0.097642	89.09	9	9	Median	0.68601	0.17298	54.448	9	9	Median	110930000	104510000	3794300	2625200			+	399	2090;2991;4588;8663;10973;11967;12083;13910;15085;15202	True;True;True;True;True;True;True;True;True;True	2156;3082;4711;8908;11360;12381;12498;14394;15614;15733	4833;4834;6754;10117;19780;24697;24698;26877;27114;31536;31537;31538;34413;34414;34415;34416;34699
CON__Q3MHN5	CON__Q3MHN5	17	2	2			>Q3MHN5 SWISS-PROT:Q3MHN5 (Bos taurus) Vitamin D-binding protein precursor	1	17	2	2	42.4	4	4	53.341	474	474	0	5.9452	NaN	NaN	NaN	1	1	Median	NaN	NaN	NaN	1	1	Median	NaN	NaN	NaN	1	1	Median	302850000	299280000	1599700	1970400			+	400	3112;3139;3527;4636;4637;5303;5428;5429;5430;5642;7001;7176;11115;11550;12260;14009;14328	False;True;False;False;False;False;False;False;False;False;False;True;False;False;False;False;False	3205;3232;3624;4761;4762;5440;5569;5570;5571;5787;7198;7376;11510;11958;12681;14500;14835	6988;7035;7840;7841;7842;10236;10237;10238;11710;12064;12065;12066;12067;12608;12609;15600;15996;15997;24977;25902;25903;25904;27502;31877;31878;31879;31880;32608;32609;32610;32611;32612;32613;32614;32615;32616;32617
CON__Q3SX09;E9PFT6;P68871;P02042	CON__Q3SX09	14;2;2;2	14;2;2;2	10;1;1;1			>Q3SX09 TREMBL:Q3SX09 (Bos taurus) similar to HBG protein	4	14	14	10	59.2	59.2	41.8	22.06	201	201;141;147;147	0	92.343	0.048873	0.21152	161.4	39	39	Median	0.060107	0.058962	131.44	24	24	Median	1.2859	0.29873	127.46	24	24	Median	1291500000	1259200000	21161000	11125000			+	401	219;3608;3696;7208;7894;8224;8395;10842;13462;13952;14010;14011;14729;14730	True;True;True;True;True;True;True;True;True;True;True;True;True;True	224;3705;3794;7410;8119;8454;8628;11226;13928;14440;14501;14502;15249;15250	414;415;416;8004;8005;8006;8007;8008;8009;8010;8163;8164;8165;16084;16085;16086;17902;18777;18778;18779;18780;18781;18782;18783;18784;18785;18786;19202;19203;19204;19205;19206;19207;19208;19209;19210;19211;19212;19213;19214;19215;19216;19217;24341;24342;24343;24344;24345;30302;30303;30304;31664;31665;31666;31667;31668;31669;31881;31882;31883;31884;31885;31886;31887;33676;33677;33678;33679;33680;3…
CON__Q3SX14	CON__Q3SX14	10	10	2			>Q3SX14 TREMBL:Q3SX14 (Bos taurus) Similar to Gelsolin	1	10	10	2	17.3	17.3	3.8	85.686	781	781	0	52.171	0.11684	0.47603	10.801	5	0	Median	0.99048	0.93716	4.1575	5	0	Median	8.1413	2.0215	10.743	5	0	Median	142850000	76779000	10411000	55662000			+	402	538;586;1361;2516;3419;5493;10723;11181;12511;15121	True;True;True;True;True;True;True;True;True;True	557;606;1411;2595;3516;5636;11106;11576;12944;15652	1186;1187;1188;1288;1289;1290;3160;5689;7595;7596;7597;12302;12303;24124;24125;25097;28072;34535
Q5TCU3;CON__Q3SX28;Q5TCU8;P07951;H0YKX5;H0YKP3;H0YL52;Q6ZN40;P09493;H0YL80;H0YNC7	Q5TCU3;CON__Q3SX28;Q5TCU8;P07951;H0YKX5;H0YKP3;H0YL52;Q6ZN40;P09493;H0YL80;H0YNC7	11;11;11;11;8;8;8;8;8;6;6	5;5;5;5;2;2;2;2;2;0;0	5;5;5;5;2;2;2;2;2;0;0	Tropomyosin beta chain;Tropomyosin alpha-1 chain	TPM2;TPM1	>tr|Q5TCU3|Q5TCU3_HUMAN Tropomyosin beta chain OS=Homo sapiens GN=TPM2 PE=1 SV=1;>Q3SX28 TREMBL:Q3SX28;Q5KR48 (Bos taurus) Tropomyosin 2;>tr|Q5TCU8|Q5TCU8_HUMAN Tropomyosin beta chain OS=Homo sapiens GN=TPM2 PE=1 SV=1;>sp|P07951|TPM2_HUMAN Tropomyosin beta	11	11	5	5	28.2	16.2	16.2	32.814	284	284;284;322;284;142;157;265;326;284;68;223	0	7.3593	0.25795	0.9334	34.117	7	0	Median	0.90208	0.9517	12.358	7	0	Median	3.3672	0.8814	37.724	7	0	Median	198610000	89263000	28851000	80498000			+	403	1148;1549;5328;6376;6377;6794;7425;7426;7569;9411;10891	True;True;True;False;False;True;False;False;False;True;False	1190;1603;5465;6550;6551;6985;7639;7640;7789;9699;11275	2690;2691;3636;3637;11755;14275;14276;14277;14278;14279;15192;15193;15194;16683;16684;16685;17096;17097;17098;21460;24501;24502
CON__Q3SZ57;J3KMX3;P02771	CON__Q3SZ57	31;5;5	31;5;5	31;5;5			>Q3SZ57 SWISS-PROT:Q3SZ57 (Bos taurus) Alpha-fetoprotein precursor	3	31	31	31	57.9	57.9	57.9	68.587	610	610;622;609	0	113.55	0.046429	0.18314	95.018	35	35	Median	0.061868	0.061357	106.48	24	24	Median	1.8796	0.46356	118.21	24	24	Median	2401900000	2276500000	49650000	75818000			+	404	144;1977;2598;2952;2979;3128;3302;3800;4049;4861;5244;5278;6750;6788;6789;7441;7749;7750;8582;9153;9154;10549;10648;10649;10664;10960;11116;12521;12522;14214;15135	True;True;True;True;True;True;True;True;True;True;True;True;True;True;True;True;True;True;True;True;True;True;True;True;True;True;True;True;True;True;True	148;2039;2678;3042;3070;3221;3397;3903;4159;4990;5381;5415;6940;6978;6979;6980;7656;7972;7973;8825;9413;9414;10930;11031;11032;11047;11347;11511;12954;12955;14713;14714;15666	260;261;4547;5896;5897;6662;6735;7015;7324;7325;8459;8460;8935;10772;11587;11588;11662;15101;15178;15179;15180;15181;16732;16733;16734;17595;17596;17597;19613;20833;20834;23768;23769;23963;23964;23965;23983;24675;24978;28086;28087;28088;32308;32309;34558
CON__Q3SZH5	CON__Q3SZH5	11	11	11			>Q3SZH5 TREMBL:Q3SZH5 (Bos taurus) Similar to Angiotensinogen	1	11	11	11	46	46	46	45.456	424	424	0	30.923	0.089354	0.37408	64.076	14	14	Median	0.11258	0.10927	66.798	10	10	Median	0.99311	0.26516	87.673	10	10	Median	355960000	322530000	18214000	15216000			+	405	1436;1563;7189;8282;8607;10652;11561;11748;11961;14163;14312	True;True;True;True;True;True;True;True;True;True;True	1487;1617;7391;8512;8851;11035;11969;12159;12375;14660;14819	3351;3666;16035;16036;18947;18948;18949;18950;18951;18952;19676;19677;23968;23969;23970;25951;26415;26868;26869;32207;32566;32567
CON__Q3SZR3	CON__Q3SZR3	4	4	4			>Q3SZR3 SWISS-PROT:Q3SZR3 (Bos taurus) Alpha-1-acid glycoprotein precursor	1	4	4	4	29.7	29.7	29.7	23.182	202	202	0	9.7952	0.055179	0.217	74.026	5	5	Median	0.066818	0.068386	79.531	3	3	Plateau	1.761	0.45748	127.22	3	3	Plateau	167650000	157080000	4703000	5868500			+	406	767;1997;10267;13587	True;True;True;True	797;2061;10637;14054	1788;4589;23239;23240;30603;30604;30605;30606;30607
CON__Q3SZV7	CON__Q3SZV7	10	10	10			>Q3SZV7 TREMBL:Q3SZV7 (Bos taurus) Similar to hemopexin	1	10	10	10	35.7	35.7	35.7	52.295	460	460	0	28.875	0.18302	0.70079	120.83	9	9	Median	0.039872	0.038378	40.88	3	3	Median	0.40526	0.10187	220.77	3	3	Median	438870000	387330000	48155000	3376400			+	407	672;2609;2818;3888;4286;7523;9567;10205;11600;14970	True;True;True;True;True;True;True;True;True;True	699;2689;2904;3993;4400;7743;9888;10573;12008;15498	1545;1546;5931;6355;8611;8612;9424;17002;17003;17004;17005;21764;21765;21766;23119;23120;23121;26022;34160
CON__Q3T052;B7ZKJ8;Q14624;H7C0L5	CON__Q3T052	17;2;2;1	17;2;2;1	17;2;2;1			>Q3T052 TREMBL:Q3T052;Q5EA67 (Bos taurus) Inter-alpha (Globulin) inhibitor H4	4	17	17	17	24.9	24.9	24.9	101.51	916	916;935;930;719	0	55.669	0.11409	0.43021	113.23	17	17	Median	0.11869	0.11147	96.161	13	13	Median	0.80251	0.20583	96.759	13	13	Median	277130000	259570000	10840000	6725900			+	408	26;2755;3508;3770;5365;7166;8276;8755;9324;10972;12242;14422;14538;14549;14570;15123;15293	True;True;True;True;True;True;True;True;True;True;True;True;True;True;True;True;True	28;2838;3605;3873;5502;7366;8506;9003;9589;11359;12662;14931;15049;15060;15082;15654;15834	47;6210;7803;8389;8390;8391;8392;11824;11825;11826;15975;15976;18935;18936;18937;19981;19982;19983;19984;19985;19986;21246;24696;27448;32830;32831;33136;33137;33200;33252;34537;34938
CON__Q3Y5Z3	CON__Q3Y5Z3	4	4	4			>Q3Y5Z3 SWISS-PROT:Q3Y5Z3 (Bos taurus) Adiponectin precursor	1	4	4	4	19.2	19.2	19.2	26.133	240	240	0	24.621	0.11759	0.46213	105.54	6	6	Median	0.10727	0.10937	84.154	6	6	Median	0.7869	0.20307	136.45	6	6	Median	155690000	132170000	18431000	5091600			+	409	1001;5810;10761;11061	True;True;True;True	1035;5959;11144;11453	2336;12948;12949;12950;24197;24863
CON__Q3ZBS7;P04004	CON__Q3ZBS7	9;2	9;2	9;2			>Q3ZBS7 TREMBL:Q3ZBS7 (Bos taurus) Vitronectin	2	9	9	9	18.4	18.4	18.4	54.099	484	484;478	0	34.617	0.063426	0.23854	117.64	15	15	Median	0.030977	0.031786	86.939	13	13	Median	3.7366	0.98755	116.1	13	13	Linear	392900000	372400000	8238900	12259000			+	410	2525;2617;4803;7970;8208;10322;11009;11418;13455	True;True;True;True;True;True;True;True;True	2604;2697;4930;8197;8438;10694;11396;11824;13921	5702;5703;5704;5705;5945;5946;5947;10647;10648;18085;18747;18748;18749;18750;18751;23332;23333;24752;24753;24754;25599;30294
CON__Q58D62	CON__Q58D62	11	11	11			>Q58D62 SWISS-PROT:Q58D62 (Bos taurus) Fetuin-B precursor	1	11	11	11	35.7	35.7	35.7	42.663	387	387	0	56.49	0.11151	0.43666	102.29	35	35	Median	0.061946	0.063573	125.75	25	25	Median	0.95211	0.24779	114.85	25	25	Median	1826100000	1725300000	64843000	35920000			+	411	727;2170;3848;5024;5240;5776;6012;11199;13073;14742;14743	True;True;True;True;True;True;True;True;True;True;True	755;2238;3952;3953;5156;5377;5925;6165;11594;13527;15264;15265	1656;1657;1658;4999;8538;8539;8540;8541;8542;8543;8544;8545;11123;11124;11125;11582;12878;12879;12880;13453;13454;13455;13456;13457;25125;25126;25127;25128;25129;25130;29387;29388;29389;29390;29391;29392;29393;33702;33703;33704;33705
CON__Q5D862;Q5D862	CON__Q5D862;Q5D862	2;2	2;2	2;2	Filaggrin-2	FLG2	>Q5D862 SWISS-PROT:Q5D862 Tax_Id=9606 Gene_Symbol=FLG2 Filaggrin-2;>sp|Q5D862|FILA2_HUMAN Filaggrin-2 OS=Homo sapiens GN=FLG2 PE=1 SV=1	2	2	2	2	1	1	1	248.07	2391	2391;2391	0	3.2384	NaN	NaN	NaN	0	0	Median	NaN	NaN	NaN	0	0	Median	NaN	NaN	NaN	0	0	Median	799280	799280	0	0			+	412	3987;12228	True;True	4097;12648	8818;27431
CON__Q95121	CON__Q95121	5	5	5			>Q95121 SWISS-PROT:Q95121 (Bos taurus) Pigment epithelium-derived factor precursor	1	5	5	5	20.9	20.9	20.9	46.228	416	416	0	33.534	0.09163	0.33468	45.869	4	4	Median	0.039861	0.040775	75.081	3	3	Median	0.67518	0.18077	94.549	3	3	Median	92459000	89136000	2406400	916330			+	413	5579;8959;11323;13219;15080	True;True;True;True;True	5724;9212;11727;13678;15608	12481;12482;12483;20430;20431;25390;25391;29715;29716;34406
CON__Q9D312	CON__Q9D312	2	2	2			>Q9D312 SWISS-PROT:Q9D312 Tax_Id=10090 Gene_Symbol=Krt20 Keratin, type I cytoskeletal 20	1	2	2	2	5.6	5.6	5.6	49.034	431	431	0.010035	0.86139	0.20057	0.86998	30.489	3	0	Median	1.0624	1.0193	10.619	3	0	Median	5.3899	1.2948	15.376	3	0	Median	51396000	23337000	4303500	23755000			+	414	5599;10646	True;True	5744;11029	12523;12524;12525;23960
CON__Q9N2I2	CON__Q9N2I2	1	1	1			>Q9N2I2 SWISS-PROT:Q9N2I2 (Bos taurus) Plasma serine protease inhibitor precursor	1	1	1	1	3	3	3	45.296	404	404	0	2.7991	0.21659	0.83918	57.022	2	2	Median	0.39352	0.38092	15.342	2	2	Median	1.8169	0.46236	74.308	2	2	Median	29458000	15571000	2893200	10993000			+	415	8539	TRUE	8782	19514;19515
CON__Q9TRI1;Q5T985;A0A087WTE1;P19823;Q5T987	CON__Q9TRI1	17;5;5;5;1	17;5;5;5;1	17;5;5;5;1			>Q9TRI1 TREMBL:Q9TRI1 (Bos taurus) similar to inter-alpha-trypsin inhibitor heavy chain2	5	17	17	17	25.2	25.2	25.2	106.19	946	946;935;945;946;237	0	96.244	0.092905	0.34612	84.896	50	50	Median	0.0669	0.065181	130.21	43	43	Median	0.87811	0.23482	104.78	43	43	Median	900190000	834850000	35377000	29972000			+	416	681;888;4128;5364;5955;6380;6722;6723;7079;9234;10297;11481;11618;12658;13259;14369;14703	True;True;True;True;True;True;True;True;True;True;True;True;True;True;True;True;True	708;920;4238;5501;6106;6554;6911;6912;7276;9497;10668;11889;12026;13096;13721;14876;15222	1565;1566;1567;1568;1569;1570;1571;1572;2045;2046;2047;2048;9062;9063;9064;9065;9066;9067;11823;13271;13272;13273;13274;13275;13276;14282;14283;14284;14285;14286;14287;15049;15050;15051;15052;15053;15054;15739;15740;21082;23298;25750;26126;26127;26128;26129;26130;28412;28413;28414;28415;28416;29801;29802;32739;32740;32741;32742;32743;32744;32745;33622;33623;33624;33625;33626
CON__Q9TT36;P05543	CON__Q9TT36;P05543	2;1	2;1	2;1	Thyroxine-binding globulin	SERPINA7	>Q9TT36 SWISS-PROT:Q9TT36 (Bos taurus) Thyroxine-binding globulin precursor;>sp|P05543|THBG_HUMAN Thyroxine-binding globulin OS=Homo sapiens GN=SERPINA7 PE=1 SV=2	2	2	2	2	4.6	4.6	4.6	46.017	411	411;415	0	3.1654	NaN	NaN	NaN	0	0	Median	NaN	NaN	NaN	0	0	Median	NaN	NaN	NaN	0	0	Median	12814000	12814000	0	0			+	417	9714;11284	True;True	10061;11684	22112;25306
CON__Q9TTE1;CON__A2I7N0;CON__A2I7N1	CON__Q9TTE1;CON__A2I7N0	9;5;4	9;5;4	8;5;3			>Q9TTE1 SWISS-PROT:Q9TTE1 (Bos taurus) Endopin-1 precursor;>A2I7N0 TREMBL:A2I7N0;Q28922;Q3ZEJ6 (Bos taurus) SERPINA3-4	3	9	9	8	20.4	20.4	18.5	46.203	411	411;411;411	0	52.027	0.10129	0.43687	63.359	9	9	Median	0.11066	0.10987	105.53	6	6	Median	0.55319	0.13375	100.22	6	6	Median	500210000	481340000	8896300	9974000			+	418	2552;5910;8998;10276;10884;11010;11793;11794;13469	True;True;True;True;True;True;True;True;True	2631;6061;9254;10647;11268;11397;12205;12206;13935	5811;13186;20518;23258;24488;24489;24490;24491;24492;24755;24756;24757;26507;26508;26509;26510;30314
CON__REFSEQ:XP_001252647	CON__REFSEQ:XP_001252647	8	7	2			>REFSEQ:XP_001252647 (Bos taurus) similar to endopin 2B	1	8	7	2	20.9	18.9	4.6	46.897	417	417	0	19.595	0.10169	0.38244	148.79	5	5	Median	0.067508	0.067464	10.114	4	4	Median	1.196	0.30173	115.52	4	4	Median	238180000	212760000	17531000	7895300			+	419	2001;2208;2209;3968;5331;7959;8998;12932	True;True;True;True;True;True;False;True	2065;2277;2278;4076;5468;8185;9254;13386	4593;5067;5068;5069;5070;8778;11760;18060;18061;20518;29094
CON__REFSEQ:XP_585019;P43652	CON__REFSEQ:XP_585019	9;1	9;1	9;1			>REFSEQ:XP_585019 (Bos taurus) similar to afamin	2	9	9	9	16.6	16.6	16.6	69.561	604	604;599	0	22.944	0.057024	0.22277	68.328	6	6	Median	0.059048	0.056145	81.283	6	6	Median	0.66704	0.16244	86.754	6	6	Median	170530000	159450000	4884500	6195400			+	420	416;3280;3843;7382;9899;10101;10524;10871;10955	True;True;True;True;True;True;True;True;True	433;3374;3947;7594;10252;10464;10905;11255;11342	882;7268;8533;16564;22460;22934;23728;24391;24610;24611;24612
H0Y3P2;D3DQV9;P78344;E9PKF8;H0YCH5;H0YE22;H0YD77;H0YEC5;H0YD99;H0YEN8;H0YDC0;H0YCF8	H0Y3P2;D3DQV9;P78344;E9PKF8	10;10;10;5;4;3;3;2;1;1;1;1	10;10;10;5;4;3;3;2;1;1;1;1	10;10;10;5;4;3;3;2;1;1;1;1	Eukaryotic translation initiation factor 4 gamma 2	EIF4G2	>tr|H0Y3P2|H0Y3P2_HUMAN Eukaryotic translation initiation factor 4 gamma 2 OS=Homo sapiens GN=EIF4G2 PE=1 SV=1;>tr|D3DQV9|D3DQV9_HUMAN Eukaryotic translation initiation factor 4 gamma 2 (Fragment) OS=Homo sapiens GN=EIF4G2 PE=1 SV=1;>sp|P78344|IF4G2_HUMAN	12	10	10	10	12	12	12	98.117	869	869;907;907;186;444;234;282;244;84;112;116;130	0	16.414	0.26146	1.0401	6.9118	6	0	Median	1.043	1.035	5.4563	6	0	Median	4.0044	1.0229	9.3949	6	0	Median	80596000	33103000	9763400	37730000				421	1507;3811;4771;7618;8623;8631;11657;12259;12302;13012	True;True;True;True;True;True;True;True;True;True	1559;3915;4897;7839;8867;8875;12065;12680;12725;13466	3542;8482;10528;17194;19710;19724;26205;27501;27597;27598;29254
D3DRR9;Q86WR7	D3DRR9;Q86WR7	1;1	1;1	1;1	Proline and serine-rich protein 2	C10orf47;PROSER2	>tr|D3DRR9|D3DRR9_HUMAN Chromosome 10 open reading frame 47, isoform CRA_b OS=Homo sapiens GN=C10orf47 PE=1 SV=1;>sp|Q86WR7|PRSR2_HUMAN Proline and serine-rich protein 2 OS=Homo sapiens GN=PROSER2 PE=1 SV=2	2	1	1	1	6.3	6.3	6.3	24.792	239	239;435	0.0014333	1.4549	NaN	NaN	NaN	1	0	Median	NaN	NaN	NaN	1	0	Median	NaN	NaN	NaN	1	0	Median	9483000	4204600	947380	4331100				422	11314	TRUE	11717	25376
D3DTZ5;J3QSB9;P63272	D3DTZ5;J3QSB9;P63272	2;2;2	2;2;2	2;2;2	Transcription elongation factor SPT4	SUPT4H1	>tr|D3DTZ5|D3DTZ5_HUMAN Suppressor of Ty 4 homolog 1 (S. cerevisiae), isoform CRA_b OS=Homo sapiens GN=SUPT4H1 PE=1 SV=1;>tr|J3QSB9|J3QSB9_HUMAN Transcription elongation factor SPT4 OS=Homo sapiens GN=SUPT4H1 PE=1 SV=1;>sp|P63272|SPT4H_HUMAN Transcription	3	2	2	2	30.3	30.3	30.3	8.5057	76	76;108;117	0	3.6743	0.22559	1.1506	3.4988	3	1	Median	0.95206	0.97411	7.0592	3	1	Plateau	4.0078	0.82092	10.08	3	1	Median	26692000	12072000	3186000	11434000				423	8563;14478	True;True	8806;14989	19565;32970;32971
D3YTB1;F8W727;P62910;D3YTI8	D3YTB1;F8W727;P62910	6;6;6;1	6;6;6;1	6;6;6;1	60S ribosomal protein L32	RPL32	>tr|D3YTB1|D3YTB1_HUMAN 60S ribosomal protein L32 (Fragment) OS=Homo sapiens GN=RPL32 PE=1 SV=1;>tr|F8W727|F8W727_HUMAN 60S ribosomal protein L32 OS=Homo sapiens GN=RPL32 PE=1 SV=1;>sp|P62910|RL32_HUMAN 60S ribosomal protein L32 OS=Homo sapiens GN=RPL32 PE	4	6	6	6	44.4	44.4	44.4	15.616	133	133;153;135;62	0	31.091	0.14895	0.62442	4.5796	6	0	Median	0.89886	0.99276	2.0867	6	0	Median	6.2871	1.6161	7.8048	6	0	Median	323700000	154050000	27138000	142510000				424	121;3048;3758;4933;5390;12243	True;True;True;True;True;True	124;3140;3857;3858;5063;5528;12663	208;209;6857;6858;8361;8362;8363;10929;11978;27449;27450
D6RAY7;D6R9P4;D6RFF8;P46926;D6R917;D6RB13	D6RAY7;D6R9P4;D6RFF8;P46926;D6R917;D6RB13	2;2;2;2;1;1	2;2;2;2;1;1	2;2;2;2;1;1	Glucosamine-6-phosphate isomerase;Glucosamine-6-phosphate isomerase 1	GNPDA1	>tr|D6RAY7|D6RAY7_HUMAN Glucosamine-6-phosphate isomerase (Fragment) OS=Homo sapiens GN=GNPDA1 PE=1 SV=1;>tr|D6R9P4|D6R9P4_HUMAN Glucosamine-6-phosphate isomerase OS=Homo sapiens GN=GNPDA1 PE=1 SV=1;>tr|D6RFF8|D6RFF8_HUMAN Glucosamine-6-phosphate isomerase	6	2	2	2	9.3	9.3	9.3	26.987	237	237;274;290;289;138;161	0	9.5113	0.25586	1.0505	17.9	3	1	Median	1.0466	1.0596	1.4118	3	1	Median	4.032	0.95859	14.669	3	1	Median	35975000	14581000	4299400	17095000				425	5997;12741	True;True	6150;13181	13397;28612;28613
D6R9V8;Q9UKY7	D6R9V8;Q9UKY7	1;1	1;1	1;1	Protein CDV3 homolog	CDV3	>tr|D6R9V8|D6R9V8_HUMAN Protein CDV3 homolog OS=Homo sapiens GN=CDV3 PE=1 SV=1;>sp|Q9UKY7|CDV3_HUMAN Protein CDV3 homolog OS=Homo sapiens GN=CDV3 PE=1 SV=1	2	1	1	1	9	9	9	17.309	156	156;258	0	7.2415	NaN	NaN	NaN	1	1	Median	NaN	NaN	NaN	1	1	Median	NaN	NaN	NaN	1	1	Median	7975700	3399100	1186900	3389700				426	8675	TRUE	8920	19796
D6RAA6;P57088;H0Y8N0	D6RAA6;P57088;H0Y8N0	3;3;2	3;3;2	3;3;2	Transmembrane protein 33	TMEM33	>tr|D6RAA6|D6RAA6_HUMAN Transmembrane protein 33 (Fragment) OS=Homo sapiens GN=TMEM33 PE=1 SV=1;>sp|P57088|TMM33_HUMAN Transmembrane protein 33 OS=Homo sapiens GN=TMEM33 PE=1 SV=2;>tr|H0Y8N0|H0Y8N0_HUMAN Transmembrane protein 33 (Fragment) OS=Homo sapiens	3	3	3	3	14	14	14	25.223	222	222;247;155	0	12.646	0.26539	1.0781	4.3369	3	1	Median	0.97038	0.99287	3.2316	3	1	Median	3.6872	0.95775	3.5171	3	1	Plateau	49480000	22435000	5819000	21226000				427	992;5007;8786	True;True;True	1026;5139;9034	2273;11093;20041
D6RAN4;P32969;E7ESE0;H0Y9V9;H0Y9R4	D6RAN4;P32969;E7ESE0;H0Y9V9	5;5;4;4;2	5;5;4;4;2	5;5;4;4;2	60S ribosomal protein L9	RPL9	>tr|D6RAN4|D6RAN4_HUMAN 60S ribosomal protein L9 (Fragment) OS=Homo sapiens GN=RPL9 PE=1 SV=5;>sp|P32969|RL9_HUMAN 60S ribosomal protein L9 OS=Homo sapiens GN=RPL9 PE=1 SV=1;>tr|E7ESE0|E7ESE0_HUMAN 60S ribosomal protein L9 (Fragment) OS=Homo sapiens GN=RPL	5	5	5	5	33.5	33.5	33.5	20.874	182	182;192;166;189;91	0	28.411	0.26417	1.0732	9.4855	3	0	Median	0.87091	0.88715	10.322	3	0	Median	3.2404	0.81611	9.6618	3	0	Median	367310000	165950000	44376000	156980000				428	2105;3779;5172;12629;12668	True;True;True;True;True	2172;3882;5307;13066;13108	4870;4871;4872;4873;8405;11425;28355;28356;28429;28430;28431
D6RD63;D6RAX7;Q9BT78;D6RFN0	D6RD63;D6RAX7;Q9BT78;D6RFN0	6;6;6;5	6;6;6;5	6;6;6;5	COP9 signalosome complex subunit 4	COPS4	>tr|D6RD63|D6RD63_HUMAN COP9 signalosome complex subunit 4 (Fragment) OS=Homo sapiens GN=COPS4 PE=1 SV=1;>tr|D6RAX7|D6RAX7_HUMAN COP9 signalosome complex subunit 4 OS=Homo sapiens GN=COPS4 PE=1 SV=1;>sp|Q9BT78|CSN4_HUMAN COP9 signalosome complex subunit 4	4	6	6	6	31.6	31.6	31.6	31.433	275	275;420;406;438	0	52.794	0.23272	0.81738	8.1615	4	0	Median	1.0138	1.0077	1.8809	4	0	Median	4.6243	1.2636	7.9041	4	0	Median	156670000	66150000	20000000	70520000				429	1633;1722;4850;5588;9274;9280	True;True;True;True;True;True	1687;1778;4978;5733;9538;9544	3803;4042;4043;10740;12506;21164;21174;21175;21176;21177
D6RBT3;O75380	D6RBT3;O75380	1;1	1;1	1;1	NADH dehydrogenase [ubiquinone] iron-sulfur protein 6, mitochondrial	NDUFS6	>tr|D6RBT3|D6RBT3_HUMAN NADH dehydrogenase [ubiquinone] iron-sulfur protein 6, mitochondrial OS=Homo sapiens GN=NDUFS6 PE=1 SV=1;>sp|O75380|NDUS6_HUMAN NADH dehydrogenase [ubiquinone] iron-sulfur protein 6, mitochondrial OS=Homo sapiens GN=NDUFS6 PE=1 SV=1	2	1	1	1	8.7	8.7	8.7	18.751	172	172;124	0.0027599	1.1964	NaN	NaN	NaN	1	0	Median	NaN	NaN	NaN	1	0	Median	NaN	NaN	NaN	1	0	Median	5610400	2345100	398030	2867200				430	13812	TRUE	14288	31223
D6RBV2;Q12907;D6RIU4;D6RDX1;D6RBH1	D6RBV2;Q12907;D6RIU4;D6RDX1	4;4;3;3;1	4;4;3;3;1	4;4;3;3;1	Vesicular integral-membrane protein VIP36	LMAN2	>tr|D6RBV2|D6RBV2_HUMAN Vesicular integral-membrane protein VIP36 OS=Homo sapiens GN=LMAN2 PE=1 SV=1;>sp|Q12907|LMAN2_HUMAN Vesicular integral-membrane protein VIP36 OS=Homo sapiens GN=LMAN2 PE=1 SV=1;>tr|D6RIU4|D6RIU4_HUMAN Vesicular integral-membrane pro	5	4	4	4	21.8	21.8	21.8	36.543	325	325;356;192;288;203	0	10.093	0.19005	1.1049	27.593	5	5	Linear	0.92475	0.90646	10.75	5	5	Median	4.0645	1.0347	24.601	5	5	Median	99287000	44985000	10541000	43761000				431	2423;8579;9980;10164	True;True;True;True	2497;8822;10336;10530	5486;19609;19610;22644;23044
D6RBW1;P06730;H0Y8J7;D6RHE2;H0Y8X3;A6NMX2	D6RBW1;P06730;H0Y8J7	5;5;3;1;1;1	5;5;3;1;1;1	5;5;3;1;1;1	Eukaryotic translation initiation factor 4E	EIF4E	>tr|D6RBW1|D6RBW1_HUMAN Eukaryotic translation initiation factor 4E OS=Homo sapiens GN=EIF4E PE=1 SV=1;>sp|P06730|IF4E_HUMAN Eukaryotic translation initiation factor 4E OS=Homo sapiens GN=EIF4E PE=1 SV=2;>tr|H0Y8J7|H0Y8J7_HUMAN Eukaryotic translation initi	6	5	5	5	18.8	18.8	18.8	28.512	245	245;217;155;90;171;242	0	14.73	0.24561	0.96524	7.2638	6	0	Median	1.021	1.041	5.8831	6	0	Median	4.1081	1.065	9.1961	6	0	Median	178690000	76471000	21146000	81074000				432	5546;6647;13258;14807;14849	True;True;True;True;True	5690;6835;13720;15330;15375	12411;14907;14908;29800;33809;33810;33811;33916
D6RC52;D6RCB9;Q9NX24;J3QSY4;H0YC83	D6RC52;D6RCB9;Q9NX24;J3QSY4	3;3;3;2;1	3;3;3;2;1	3;3;3;2;1	H/ACA ribonucleoprotein complex subunit 2	NHP2	>tr|D6RC52|D6RC52_HUMAN H/ACA ribonucleoprotein complex subunit 2 (Fragment) OS=Homo sapiens GN=NHP2 PE=1 SV=1;>tr|D6RCB9|D6RCB9_HUMAN H/ACA ribonucleoprotein complex subunit 2 (Fragment) OS=Homo sapiens GN=NHP2 PE=1 SV=1;>sp|Q9NX24|NHP2_HUMAN H/ACA ribonu	5	3	3	3	36.4	36.4	36.4	15.017	132	132;135;153;90;85	0	48.487	0.19762	0.79903	9.479	4	0	Median	0.97596	0.9983	11.849	4	0	Median	4.6527	1.1832	18.249	4	0	Median	41321000	18844000	4341900	18134000				433	6028;10017;13288	True;True;True	6182;10375;13751	13506;22718;29851;29852
D6RCP9;D6RFG8;P27707	D6RCP9;D6RFG8;P27707	1;1;1	1;1;1	1;1;1	Deoxycytidine kinase	DCK	>tr|D6RCP9|D6RCP9_HUMAN Deoxycytidine kinase OS=Homo sapiens GN=DCK PE=1 SV=1;>tr|D6RFG8|D6RFG8_HUMAN Deoxycytidine kinase OS=Homo sapiens GN=DCK PE=1 SV=1;>sp|P27707|DCK_HUMAN Deoxycytidine kinase OS=Homo sapiens GN=DCK PE=1 SV=1	3	1	1	1	4	4	4	22.891	199	199;317;260	0.007064	0.95184	NaN	NaN	NaN	1	0	Median	NaN	NaN	NaN	1	0	Median	NaN	NaN	NaN	1	0	Median	18425000	8066900	1827300	8530400				434	12074	TRUE	12489	27094
D6RD46;Q9UPQ0;E7EPK0;H0Y8P3;G5EA03	D6RD46;Q9UPQ0;E7EPK0;H0Y8P3;G5EA03	5;5;4;4;4	5;5;4;4;4	1;1;0;0;0	LIM and calponin homology domains-containing protein 1	LIMCH1	>tr|D6RD46|D6RD46_HUMAN LIM and calponin homology domains-containing protein 1 OS=Homo sapiens GN=LIMCH1 PE=1 SV=1;>sp|Q9UPQ0|LIMC1_HUMAN LIM and calponin homology domains-containing protein 1 OS=Homo sapiens GN=LIMCH1 PE=1 SV=4;>tr|E7EPK0|E7EPK0_HUMAN LIM	5	5	5	1	7.3	7.3	1.6	109.93	980	980;1083;897;917;1467	0	22.069	0.22535	0.8962	10.147	3	0	Median	1.0856	1.0005	1.8314	3	0	Median	4.9051	1.101	8.0875	3	0	Median	24008000	9567500	3060500	11380000				435	4942;5001;7478;8580;11892	True;True;True;True;True	5072;5133;7694;8823;12306	10939;11084;16816;19611;26732
D6RDG3;H0Y9Y1	D6RDG3;H0Y9Y1	3;2	3;2	1;0	Transcription factor BTF3	BTF3	>tr|D6RDG3|D6RDG3_HUMAN Transcription factor BTF3 (Fragment) OS=Homo sapiens GN=BTF3 PE=1 SV=3;>tr|H0Y9Y1|H0Y9Y1_HUMAN Transcription factor BTF3 (Fragment) OS=Homo sapiens GN=BTF3 PE=1 SV=2	2	3	3	1	33	33	9.2	11.802	109	109;86	0	5.535	0.29096	1.1123	31.152	5	3	Median	1.0816	1.111	32.248	5	3	Median	3.7383	1.0161	2.7303	5	3	Median	79946000	34456000	9324400	36165000				436	7297;9500;14354	True;True;True	7503;9809;9810;14861	16353;21641;21642;21643;32713
D6RGI3;D6RER5;Q9NVA2;D6RDU5;H0Y961;H0Y9G8;D6RDP1;D6R9Y6	D6RGI3;D6RER5;Q9NVA2;D6RDU5	8;8;8;5;3;2;2;2	8;8;8;5;3;2;2;2	7;7;7;4;2;2;2;2	Septin-11	2011-09-01	>tr|D6RGI3|D6RGI3_HUMAN Septin 11, isoform CRA_b OS=Homo sapiens GN=SEPT11 PE=1 SV=1;>tr|D6RER5|D6RER5_HUMAN Septin-11 OS=Homo sapiens GN=SEPT11 PE=1 SV=1;>sp|Q9NVA2|SEP11_HUMAN Septin-11 OS=Homo sapiens GN=SEPT11 PE=1 SV=3;>tr|D6RDU5|D6RDU5_HUMAN Septin-1	8	8	8	7	22.4	22.4	20.7	49.005	425	425;432;429;372;160;82;126;136	0	32.267	0.28052	1.0537	18.203	7	0	Median	1.0688	1.0695	10.714	7	0	Median	4.1794	1.0947	19.404	7	0	Median	306650000	130940000	39072000	136640000				437	27;28;1671;5905;11591;12116;12248;14244	True;True;True;True;True;True;True;True	29;30;1725;6056;11999;12533;12669;14749	48;49;3902;13172;25999;26000;27199;27485;32396
D6REX3;O94979;H7BXG7;D6RHZ5;H0Y8W8;H0YAB3;H0YAF5;H0Y9T9;H0Y9K1;H0Y8V7;H0Y9V3	D6REX3;O94979;H7BXG7;D6RHZ5	9;9;7;6;3;3;2;2;2;2;1	9;9;7;6;3;3;2;2;2;2;1	9;9;7;6;3;3;2;2;2;2;1	Protein transport protein Sec31A	SEC31A	>tr|D6REX3|D6REX3_HUMAN Protein transport protein Sec31A OS=Homo sapiens GN=SEC31A PE=1 SV=1;>sp|O94979|SC31A_HUMAN Protein transport protein Sec31A OS=Homo sapiens GN=SEC31A PE=1 SV=3;>tr|H7BXG7|H7BXG7_HUMAN Protein transport protein Sec31A OS=Homo sapien	11	9	9	9	8.2	8.2	8.2	136.22	1251	1251;1220;969;877;383;443;181;235;237;286;219	0	16.199	0.2534	1.0077	17.759	7	0	Median	1.0419	0.98472	8.1866	7	0	Median	4.0768	0.91511	19.102	7	0	Median	120540000	49652000	17846000	53039000				438	1306;3246;3535;7108;9212;10089;10320;13003;13099	True;True;True;True;True;True;True;True;True	1354;3340;3632;7306;9474;10452;10692;13457;13553	3002;3003;7211;7866;15801;15802;21006;22904;22905;23330;29242;29437;29438;29439
D6RFF7;P98082	D6RFF7;P98082	1;1	1;1	1;1	Disabled homolog 2	DAB2	>tr|D6RFF7|D6RFF7_HUMAN Disabled homolog 2 OS=Homo sapiens GN=DAB2 PE=1 SV=1;>sp|P98082|DAB2_HUMAN Disabled homolog 2 OS=Homo sapiens GN=DAB2 PE=1 SV=3	2	1	1	1	14.7	14.7	14.7	12.726	116	116;770	1	-2	NaN	NaN	NaN	1	1	Median	NaN	NaN	NaN	0	0	Median	NaN	NaN	NaN	0	0	Median	3209600	2884800	134530	190260	+			439	9626	TRUE	9959	21923
D6RFH4;H3BUX2;J3KNF8;O43169;J3QR91	D6RFH4;H3BUX2;J3KNF8;O43169;J3QR91	2;2;2;2;1	2;2;2;2;1	2;2;2;2;1	Cytochrome b5 type B	CYB5B	>tr|D6RFH4|D6RFH4_HUMAN Cytochrome b5 type B OS=Homo sapiens GN=CYB5B PE=1 SV=1;>tr|H3BUX2|H3BUX2_HUMAN Cytochrome b5 type B OS=Homo sapiens GN=CYB5B PE=1 SV=1;>tr|J3KNF8|J3KNF8_HUMAN Cytochrome b5 type B OS=Homo sapiens GN=CYB5B PE=1 SV=1;>sp|O43169|CYB5B	5	2	2	2	32.8	32.8	32.8	14.846	131	131;140;150;146;64	0	4.1372	0.28974	1.1746	7.621	2	2	Median	1.1396	1.1608	4.442	2	2	Median	3.9332	1.0249	3.1789	2	2	Median	8251500	4271900	829310	3150400				440	3159;3816	True;True	3252;3920	7066;8488
D6RGE2;Q96CN7	D6RGE2;Q96CN7	3;3	3;3	3;3	Isochorismatase domain-containing protein 1	ISOC1	>tr|D6RGE2|D6RGE2_HUMAN Isochorismatase domain-containing protein 1 (Fragment) OS=Homo sapiens GN=ISOC1 PE=1 SV=1;>sp|Q96CN7|ISOC1_HUMAN Isochorismatase domain-containing protein 1 OS=Homo sapiens GN=ISOC1 PE=1 SV=3	2	3	3	3	21.3	21.3	21.3	20.239	188	188;298	0	3.7027	0.23134	0.96088	23.198	3	1	Median	1.1966	1.1993	2.6778	3	1	Median	5.4103	1.2863	23.774	3	1	Plateau	28829000	10772000	3222000	14836000				441	4713;6132;15020	True;True;True	4839;6289;15548	10405;13744;34258
D6RHX8;F8W9W2;P43250;P34947	D6RHX8;F8W9W2;P43250;P34947	1;1;1;1	1;1;1;1	1;1;1;1	G protein-coupled receptor kinase 6;G protein-coupled receptor kinase 5	GRK6;GRK5	>tr|D6RHX8|D6RHX8_HUMAN G protein-coupled receptor kinase 6 OS=Homo sapiens GN=GRK6 PE=1 SV=1;>tr|F8W9W2|F8W9W2_HUMAN G protein-coupled receptor kinase 6 OS=Homo sapiens GN=GRK6 PE=1 SV=1;>sp|P43250|GRK6_HUMAN G protein-coupled receptor kinase 6 OS=Homo sa	4	1	1	1	2.9	2.9	2.9	54.483	475	475;542;576;590	0.0014556	1.5906	NaN	NaN	NaN	1	1	Median	NaN	NaN	NaN	1	1	Median	NaN	NaN	NaN	1	1	Median	1307900	506960	208730	592200				442	9407	TRUE	9694	21432
D6RJD1;P09497	D6RJD1;P09497	1;1	1;1	1;1	Clathrin light chain B	CLTB	>tr|D6RJD1|D6RJD1_HUMAN Clathrin light chain B (Fragment) OS=Homo sapiens GN=CLTB PE=1 SV=1;>sp|P09497|CLCB_HUMAN Clathrin light chain B OS=Homo sapiens GN=CLTB PE=1 SV=1	2	1	1	1	8	8	8	13.078	125	125;229	0.0027804	1.2395	NaN	NaN	NaN	1	1	Median	NaN	NaN	NaN	1	1	Median	NaN	NaN	NaN	1	1	Median	12059000	4409600	2070300	5579300				443	13382	TRUE	13846	30097
E3W994;H0Y5T1;J3KR49;F8WA11;E7ERI8;E7EW49;O75122;Q7Z460	E3W994;H0Y5T1;J3KR49;F8WA11;E7ERI8;E7EW49;O75122;Q7Z460	1;1;1;1;1;1;1;1	1;1;1;1;1;1;1;1	1;1;1;1;1;1;1;1	CLIP-associating protein 2;CLIP-associating protein 1	CLASP2;CLASP1	>tr|E3W994|E3W994_HUMAN CLIP-associating protein 2 OS=Homo sapiens GN=CLASP2 PE=1 SV=2;>tr|H0Y5T1|H0Y5T1_HUMAN CLIP-associating protein 1 (Fragment) OS=Homo sapiens GN=CLASP1 PE=1 SV=2;>tr|J3KR49|J3KR49_HUMAN CLIP-associating protein 2 OS=Homo sapiens GN=C	8	1	1	1	0.9	0.9	0.9	138.86	1273	1273;1275;1293;1478;1513;1514;1294;1538	0	2.9382	0.25127	0.97506	18.563	4	4	Median	1.0459	0.98789	10.931	4	4	Median	4.1624	1.0703	10.454	4	4	Median	8748900	3704500	849770	4194600				444	2874	TRUE	2961	6462;6463;6464;6465
E5KLK1;E5KLJ6;E5KLJ9;E5KLJ5;O60313	E5KLK1;E5KLJ6;E5KLJ9;E5KLJ5;O60313	2;2;2;2;2	2;2;2;2;2	2;2;2;2;2	Dynamin-like 120 kDa protein, mitochondrial;Dynamin-like 120 kDa protein, form S1	OPA1	>tr|E5KLK1|E5KLK1_HUMAN Dynamin-like 120 kDa protein, mitochondrial OS=Homo sapiens GN=OPA1 PE=1 SV=1;>tr|E5KLJ6|E5KLJ6_HUMAN Dynamin-like 120 kDa protein, mitochondrial OS=Homo sapiens GN=OPA1 PE=1 SV=1;>tr|E5KLJ9|E5KLJ9_HUMAN Dynamin-like 120 kDa protein	5	2	2	2	2.3	2.3	2.3	111.82	961	961;978;979;1015;960	0.00098135	1.7211	0.28495	1.1867	14.254	3	3	Median	1.1713	1.1196	8.712	3	3	Plateau	4.1106	1.0275	22.333	3	3	Median	8066200	3266200	1069300	3730700				445	958;14748	True;True	991;15270	2213;33716;33717
E5RFP0;Q8WVJ2	E5RFP0;Q8WVJ2	3;3	3;3	3;3	NudC domain-containing protein 2	NUDCD2	>tr|E5RFP0|E5RFP0_HUMAN NudC domain-containing protein 2 OS=Homo sapiens GN=NUDCD2 PE=1 SV=1;>sp|Q8WVJ2|NUDC2_HUMAN NudC domain-containing protein 2 OS=Homo sapiens GN=NUDCD2 PE=1 SV=1	2	3	3	3	29.5	29.5	29.5	14.745	132	132;157	0	31.846	0.25077	1.0623	10.208	4	3	Median	1.0614	1.0814	1.763	4	3	Median	4.1918	0.99688	11.25	4	3	Median	42878000	19491000	4806200	18581000				446	1307;3196;4487	True;True;True	1355;3290;4608	3004;7126;7127;9882
E5RJD2;E5RJG7;E5RFV2;Q16698;E5RID6	E5RJD2;E5RJG7;E5RFV2;Q16698;E5RID6	2;2;2;2;1	2;2;2;2;1	2;2;2;2;1	2,4-dienoyl-CoA reductase, mitochondrial	DECR1	>tr|E5RJD2|E5RJD2_HUMAN 2,4-dienoyl-CoA reductase, mitochondrial (Fragment) OS=Homo sapiens GN=DECR1 PE=1 SV=1;>tr|E5RJG7|E5RJG7_HUMAN 2,4-dienoyl-CoA reductase, mitochondrial (Fragment) OS=Homo sapiens GN=DECR1 PE=1 SV=1;>tr|E5RFV2|E5RFV2_HUMAN 2,4-dienoy	5	2	2	2	17.2	17.2	17.2	15.898	151	151;181;205;335;95	0	10.641	0.16187	0.67234	5.8612	3	3	Plateau	1.1149	1.1174	7.3646	3	3	Median	7.4541	1.7721	13.211	3	3	Median	19440000	11414000	1205000	6820900				447	1534;13332	True;True	1586;13795	3586;3587;29936
E5RFX4;Q96KB5	E5RFX4;Q96KB5	3;3	3;3	3;3	Lymphokine-activated killer T-cell-originated protein kinase	PBK	>tr|E5RFX4|E5RFX4_HUMAN Lymphokine-activated killer T-cell-originated protein kinase (Fragment) OS=Homo sapiens GN=PBK PE=1 SV=2;>sp|Q96KB5|TOPK_HUMAN Lymphokine-activated killer T-cell-originated protein kinase OS=Homo sapiens GN=PBK PE=1 SV=3	2	3	3	3	19.9	19.9	19.9	17.075	151	151;322	0	5.5343	0.27026	0.97985	6.5902	5	3	Median	1.1258	1.0589	13.572	5	3	Median	4.3469	1.0444	12.893	5	3	Median	65980000	28079000	7483000	30418000				448	4772;11614;11659	True;True;True	4898;12022;12067	10529;26053;26054;26055;26207
E5RGS4;O60925;D6RGG5	E5RGS4;O60925;D6RGG5	2;2;1	2;2;1	2;2;1	Prefoldin subunit 1	PFDN1	>tr|E5RGS4|E5RGS4_HUMAN Prefoldin subunit 1 OS=Homo sapiens GN=PFDN1 PE=1 SV=1;>sp|O60925|PFD1_HUMAN Prefoldin subunit 1 OS=Homo sapiens GN=PFDN1 PE=1 SV=2;>tr|D6RGG5|D6RGG5_HUMAN Prefoldin subunit 1 OS=Homo sapiens GN=PFDN1 PE=1 SV=1	3	2	2	2	17.9	17.9	17.9	13.466	117	117;122;35	0	4.6462	0.30434	1.1779	22.145	3	2	Median	0.9384	0.97484	4.7813	3	2	Median	3.3043	0.84458	17.891	3	2	Plateau	30619000	13268000	4139500	13212000				449	156;7289	True;True	160;7495	283;284;16342
E5RGX5;Q93045	E5RGX5;Q93045	4;4	1;1	1;1	Stathmin;Stathmin-2	STMN2	>tr|E5RGX5|E5RGX5_HUMAN Stathmin OS=Homo sapiens GN=STMN2 PE=1 SV=1;>sp|Q93045|STMN2_HUMAN Stathmin-2 OS=Homo sapiens GN=STMN2 PE=1 SV=3	2	4	1	1	13.1	6	6	19.574	168	168;179	0	4.4356	0.2754	1.1666	58.624	3	2	Median	0.97389	0.9996	22.888	3	2	Median	3.5268	0.83873	36.805	3	2	Median	147260000	67155000	17307000	62800000				450	909;2386;2387;6990	True;False;False;False	942;2457;2458;7187	2085;2086;2087;5412;5413;5414;15574
E5RHG8;Q15369;R4GMY8	E5RHG8;Q15369;R4GMY8	3;3;2	3;3;2	3;3;2	Transcription elongation factor B polypeptide 1	TCEB1	>tr|E5RHG8|E5RHG8_HUMAN Transcription elongation factor B polypeptide 1 (Fragment) OS=Homo sapiens GN=TCEB1 PE=1 SV=1;>sp|Q15369|ELOC_HUMAN Transcription elongation factor B polypeptide 1 OS=Homo sapiens GN=TCEB1 PE=1 SV=1;>tr|R4GMY8|R4GMY8_HUMAN Transcrip	3	3	3	3	24.7	24.7	24.7	9.9601	89	89;112;65	0	14.55	0.23937	1.2355	19.476	3	0	Median	1.0667	1.0737	2.1442	3	0	Median	4.4732	0.91625	14.571	3	0	Median	88583000	36987000	10608000	40989000				451	2954;7976;7977	True;True;True	3044;8203;8204	6664;18115;18116;18117;18118
E5RHW4;O94905;E5RJ09	E5RHW4;O94905;E5RJ09	4;4;2	4;4;2	2;2;2	Erlin-2	ERLIN2	>tr|E5RHW4|E5RHW4_HUMAN Erlin-2 (Fragment) OS=Homo sapiens GN=ERLIN2 PE=1 SV=1;>sp|O94905|ERLN2_HUMAN Erlin-2 OS=Homo sapiens GN=ERLIN2 PE=1 SV=1;>tr|E5RJ09|E5RJ09_HUMAN Erlin-2 (Fragment) OS=Homo sapiens GN=ERLIN2 PE=1 SV=1	3	4	4	2	14.2	14.2	7.1	37.725	338	338;339;197	0	16.838	0.19833	0.74916	2.8796	3	0	Median	0.85985	0.85219	1.2383	3	0	Median	4.5205	1.1213	5.4293	3	0	Median	94026000	42283000	11921000	39821000				452	6439;12206;13387;14556	True;True;True;True	6615;12626;13851;15068	14418;27393;30115;33227
E5RI99;P62888;E5RJH3;A0A0C4DH44;A0A0B4J213	E5RI99;P62888	9;9;4;3;2	9;9;4;3;2	9;9;4;3;2	60S ribosomal protein L30	RPL30	>tr|E5RI99|E5RI99_HUMAN 60S ribosomal protein L30 (Fragment) OS=Homo sapiens GN=RPL30 PE=1 SV=1;>sp|P62888|RL30_HUMAN 60S ribosomal protein L30 OS=Homo sapiens GN=RPL30 PE=1 SV=2	5	9	9	9	68.4	68.4	68.4	12.656	114	114;115;56;96;51	0	60.983	0.26026	1.0782	9.255	14	0	Median	0.98336	1.0099	9.196	14	0	Median	3.7892	0.90972	8.1571	14	0	Median	599510000	266090000	76552000	256870000				453	821;7152;9118;9119;11210;11349;11584;12581;13446	True;True;True;True;True;True;True;True;True	853;7351;7352;9378;9379;11605;11754;11992;13016;13912	1898;15948;15949;15950;20765;20766;20767;20768;25147;25459;25984;28226;28227;28228;30280;30281
E5RIW3;E5RJD8;O75347;E5RHG6;E5RIX8	E5RIW3;E5RJD8;O75347;E5RHG6	6;6;6;5;2	6;6;6;5;2	6;6;6;5;2	Tubulin-specific chaperone A	TBCA	>tr|E5RIW3|E5RIW3_HUMAN Tubulin-specific chaperone A OS=Homo sapiens GN=TBCA PE=1 SV=1;>tr|E5RJD8|E5RJD8_HUMAN Tubulin-specific chaperone A OS=Homo sapiens GN=TBCA PE=1 SV=1;>sp|O75347|TBCA_HUMAN Tubulin-specific chaperone A OS=Homo sapiens GN=TBCA PE=1 SV	5	6	6	6	72.6	72.6	72.6	10.08	84	84;119;108;131;79	0	30.517	0.263	1.1114	90.189	10	0	Median	0.98946	1.012	6.3894	10	0	Median	3.7913	0.90593	90.271	10	0	Median	362580000	126860000	109610000	126110000				454	6115;7555;9135;9604;10400;10913	True;True;True;True;True;True	6272;7775;9395;9935;9936;10776;11298	13700;13701;17074;20801;21877;21878;21879;23499;24538;24539
E5RJR3;Q9NZL9	E5RJR3;Q9NZL9	1;1	1;1	1;1	Methionine adenosyltransferase 2 subunit beta	MAT2B	>tr|E5RJR3|E5RJR3_HUMAN Methionine adenosyltransferase 2 subunit beta OS=Homo sapiens GN=MAT2B PE=1 SV=1;>sp|Q9NZL9|MAT2B_HUMAN Methionine adenosyltransferase 2 subunit beta OS=Homo sapiens GN=MAT2B PE=1 SV=1	2	1	1	1	10.3	10.3	10.3	13.541	117	117;334	0	3.9177	0.16659	0.6273	9.8983	2	0	Median	1.0549	1.0115	3.0309	2	0	Median	6.1002	1.5502	10.736	2	0	Median	40626000	18083000	3266200	19277000				455	14195	TRUE	14692	32267;32268
E7ERH2;F8W8N3;E5RJR5;P63208;E5RGM3	E7ERH2;F8W8N3;E5RJR5;P63208;E5RGM3	3;3;3;3;2	3;3;3;3;2	2;2;2;2;1	S-phase kinase-associated protein 1	SKP1	>tr|E7ERH2|E7ERH2_HUMAN S-phase kinase-associated protein 1 (Fragment) OS=Homo sapiens GN=SKP1 PE=1 SV=1;>tr|F8W8N3|F8W8N3_HUMAN S-phase kinase-associated protein 1 (Fragment) OS=Homo sapiens GN=SKP1 PE=1 SV=1;>tr|E5RJR5|E5RJR5_HUMAN S-phase kinase-associa	5	3	3	2	35.2	35.2	14.8	16.034	142	142;158;163;163;102	0	10.002	0.26703	1.1187	43.959	3	0	Median	1.1029	1.1328	18.005	3	0	Median	4.3275	1.0566	18.868	3	0	Median	42621000	18671000	4996400	18954000				456	4735;12385;12858	True;True;True	4861;12811;13309	10468;10469;27784;28904
E5RJZ1;H0YBD2;O14548	E5RJZ1;H0YBD2;O14548	1;1;1	1;1;1	1;1;1	Cytochrome c oxidase subunit 7A-related protein, mitochondrial	COX7A2L	>tr|E5RJZ1|E5RJZ1_HUMAN Cytochrome c oxidase subunit 7A-related protein, mitochondrial OS=Homo sapiens GN=COX7A2L PE=1 SV=1;>tr|H0YBD2|H0YBD2_HUMAN Cytochrome c oxidase subunit 7A-related protein, mitochondrial (Fragment) OS=Homo sapiens GN=COX7A2L PE=1 SV	3	1	1	1	16.5	16.5	16.5	8.8399	79	79;95;114	0	2.0981	NaN	NaN	NaN	1	0	Median	NaN	NaN	NaN	1	0	Median	NaN	NaN	NaN	1	0	Median	7790900	2829500	896410	4065000				457	9018	TRUE	9274	20547
E5RK00;O00399	E5RK00;O00399	1;1	1;1	1;1	Dynactin subunit 6	DCTN6	>tr|E5RK00|E5RK00_HUMAN Dynactin subunit 6 OS=Homo sapiens GN=DCTN6 PE=1 SV=1;>sp|O00399|DCTN6_HUMAN Dynactin subunit 6 OS=Homo sapiens GN=DCTN6 PE=1 SV=1	2	1	1	1	5.9	5.9	5.9	18.401	170	170;190	0	2.0562	NaN	NaN	NaN	1	1	Median	NaN	NaN	NaN	1	1	Median	NaN	NaN	NaN	1	1	Median	4581700	1754900	949370	1877400				458	9453	TRUE	9752	21554
E7EM64;Q7L5N1;H7C3T0	E7EM64;Q7L5N1;H7C3T0	2;2;1	2;2;1	2;2;1	COP9 signalosome complex subunit 6	COPS6	>tr|E7EM64|E7EM64_HUMAN COP9 signalosome complex subunit 6 OS=Homo sapiens GN=COPS6 PE=1 SV=1;>sp|Q7L5N1|CSN6_HUMAN COP9 signalosome complex subunit 6 OS=Homo sapiens GN=COPS6 PE=1 SV=1;>tr|H7C3T0|H7C3T0_HUMAN COP9 signalosome complex subunit 6 (Fragment)	3	2	2	2	8.6	8.6	8.6	36.064	326	326;327;123	0	2.8109	0.23724	0.92295	21.643	3	2	Median	1.1239	1.0571	13.041	3	2	Median	5.85	1.4055	38.076	3	2	Plateau	51047000	20718000	5293300	25035000				459	1429;10733	True;True	1480;11116	3340;3341;24153
E7EMB6;E7ETB3;Q9ULA0	E7EMB6;E7ETB3;Q9ULA0	2;2;2	2;2;2	2;2;2	Aspartyl aminopeptidase	DNPEP	>tr|E7EMB6|E7EMB6_HUMAN Aspartyl aminopeptidase OS=Homo sapiens GN=DNPEP PE=1 SV=2;>tr|E7ETB3|E7ETB3_HUMAN Aspartyl aminopeptidase OS=Homo sapiens GN=DNPEP PE=1 SV=2;>sp|Q9ULA0|DNPEP_HUMAN Aspartyl aminopeptidase OS=Homo sapiens GN=DNPEP PE=1 SV=1	3	2	2	2	6.8	6.8	6.8	44.992	410	410;493;475	0	10.314	NaN	NaN	NaN	1	0	Median	NaN	NaN	NaN	1	0	Median	NaN	NaN	NaN	1	0	Median	21593000	9186900	2705300	9701300				460	4380;14935	True;True	4497;15463	9626;34099
J3QLD9;E7EMK3;Q14254;K7EKW9	J3QLD9;E7EMK3;Q14254;K7EKW9	2;2;2;1	2;2;2;1	2;2;2;1	Flotillin-2	FLOT2	>tr|J3QLD9|J3QLD9_HUMAN Flotillin-2 OS=Homo sapiens GN=FLOT2 PE=1 SV=1;>tr|E7EMK3|E7EMK3_HUMAN Flotillin-2 OS=Homo sapiens GN=FLOT2 PE=1 SV=1;>sp|Q14254|FLOT2_HUMAN Flotillin-2 OS=Homo sapiens GN=FLOT2 PE=1 SV=2;>tr|K7EKW9|K7EKW9_HUMAN Flotillin-2 (Fragmen	4	2	2	2	7	7	7	47.142	428	428;483;428;249	0	4.9007	0.33403	1.2904	18.413	3	0	Median	0.97487	1.0005	9.4966	3	0	Median	3.3148	0.84708	13.696	3	0	Median	54390000	21633000	8012600	24744000				461	6382;8096	True;True	6556;8325	14289;14290;18509
E9PGG1;E7EU01;E7EUM4;E7ERR6;E7ERH4;E7ET01;E7ETL8;E7EQU2;E7ESD3;E7EMU4;E7EV09;E7EQL5;Q13409	E9PGG1;E7EU01;E7EUM4;E7ERR6;E7ERH4;E7ET01;E7ETL8;E7EQU2;E7ESD3;E7EMU4;E7EV09;E7EQL5;Q13409	1;1;1;1;1;1;1;1;1;1;1;1;1	1;1;1;1;1;1;1;1;1;1;1;1;1	1;1;1;1;1;1;1;1;1;1;1;1;1	Cytoplasmic dynein 1 intermediate chain 2	DYNC1I2	>tr|E9PGG1|E9PGG1_HUMAN Cytoplasmic dynein 1 intermediate chain 2 (Fragment) OS=Homo sapiens GN=DYNC1I2 PE=1 SV=1;>tr|E7EU01|E7EU01_HUMAN Cytoplasmic dynein 1 intermediate chain 2 OS=Homo sapiens GN=DYNC1I2 PE=1 SV=1;>tr|E7EUM4|E7EUM4_HUMAN Cytoplasmic dyn	13	1	1	1	12.7	12.7	12.7	12.328	110	110;121;137;139;151;173;184;185;187;214;251;305;638	0	15.976	0.27115	1.0459	31.104	3	2	Median	1.0761	1.039	4.5627	3	2	Median	6.8438	1.6666	35.575	3	2	Plateau	45574000	20635000	4091900	20846000				462	2762	TRUE	2845	6229;6230;6231
H0Y612;E7EN20;Q9UPN9	H0Y612;E7EN20;Q9UPN9	2;2;2	2;2;2	2;2;2	E3 ubiquitin-protein ligase TRIM33	TRIM33	>tr|H0Y612|H0Y612_HUMAN E3 ubiquitin-protein ligase TRIM33 (Fragment) OS=Homo sapiens GN=TRIM33 PE=1 SV=1;>tr|E7EN20|E7EN20_HUMAN E3 ubiquitin-protein ligase TRIM33 OS=Homo sapiens GN=TRIM33 PE=1 SV=2;>sp|Q9UPN9|TRI33_HUMAN E3 ubiquitin-protein ligase TRIM	3	2	2	2	2.8	2.8	2.8	98.891	888	888;1119;1127	0.001432	1.4536	0.35053	1.4057	38.983	2	1	Median	0.9479	1.0187	0.54194	2	1	Median	2.6567	0.76127	34.146	2	1	Median	12369000	5284900	1964000	5120600				463	3411;11646	True;True	3508;12054	7583;26184
K7EJL1;E7ENJ6;Q9BXS5;K7EK69;K7ERH5;K7EL08;Q9Y6Q5	K7EJL1;E7ENJ6;Q9BXS5;K7EK69;K7ERH5;K7EL08;Q9Y6Q5	2;2;2;1;1;1;1	2;2;2;1;1;1;1	2;2;2;1;1;1;1	AP-1 complex subunit mu-1;AP-1 complex subunit mu-2	AP1M1;AP1M2	>tr|K7EJL1|K7EJL1_HUMAN AP-1 complex subunit mu-1 OS=Homo sapiens GN=AP1M1 PE=1 SV=1;>tr|E7ENJ6|E7ENJ6_HUMAN AP-1 complex subunit mu-1 OS=Homo sapiens GN=AP1M1 PE=1 SV=1;>sp|Q9BXS5|AP1M1_HUMAN AP-1 complex subunit mu-1 OS=Homo sapiens GN=AP1M1 PE=1 SV=3;>t	7	2	2	2	6.8	6.8	6.8	40.296	351	351;370;423;44;103;128;423	0	2.4999	0.29998	1.1565	35.476	2	1	Median	1.0048	1.0278	11.677	2	1	Median	3.3488	0.89863	23.773	2	1	Median	28044000	11635000	4272900	12136000				464	3592;11396	True;True	3689;11802	7982;25542
E7EV99;E7ENY0;P35611;A0A0A0MSR2;H0Y9H2;D6RF25	E7EV99;E7ENY0;P35611;A0A0A0MSR2;H0Y9H2	5;5;5;3;3;1	5;5;5;3;3;1	5;5;5;3;3;1	Alpha-adducin	ADD1	>tr|E7EV99|E7EV99_HUMAN Alpha-adducin OS=Homo sapiens GN=ADD1 PE=1 SV=1;>tr|E7ENY0|E7ENY0_HUMAN Alpha-adducin OS=Homo sapiens GN=ADD1 PE=1 SV=1;>sp|P35611|ADDA_HUMAN Alpha-adducin OS=Homo sapiens GN=ADD1 PE=1 SV=2;>tr|A0A0A0MSR2|A0A0A0MSR2_HUMAN Alpha-addu	6	5	5	5	12	12	12	70.055	632	632;663;737;400;444;143	0	32.21	0.18314	0.70064	13.882	5	0	Median	1.0748	1.0646	6.1572	5	0	Median	6.2601	1.5786	14.85	5	0	Median	40318000	17374000	4456000	18487000				465	6267;7291;11719;12743;13077	True;True;True;True;True	6438;7497;12127;13183;13531	14055;16346;26352;28622;29400
E7EPA1;O60256;C9JJS3;C9K0K7;C9JDU5;C9JDH0;E7EW35;I3L331;I3L164;I3L0S1;I3L4G9	E7EPA1;O60256;C9JJS3;C9K0K7;C9JDU5;C9JDH0;E7EW35	6;6;5;5;4;3;3;2;2;2;1	6;6;5;5;4;3;3;2;2;2;1	6;6;5;5;4;3;3;2;2;2;1	Phosphoribosyl pyrophosphate synthase-associated protein 2	PRPSAP2	>tr|E7EPA1|E7EPA1_HUMAN Phosphoribosyl pyrophosphate synthase-associated protein 2 (Fragment) OS=Homo sapiens GN=PRPSAP2 PE=1 SV=1;>sp|O60256|KPRB_HUMAN Phosphoribosyl pyrophosphate synthase-associated protein 2 OS=Homo sapiens GN=PRPSAP2 PE=1 SV=1;>tr|C9J	11	6	6	6	30.2	30.2	30.2	29.642	268	268;369;194;244;176;140;161;93;104;260;143	0	16.988	0.24473	0.87514	13.541	5	0	Median	1.1449	1.1236	3.5351	5	0	Median	4.7913	1.2345	9.9395	5	0	Median	143740000	60943000	15493000	67302000				466	1491;2955;11444;12132;14380;14411	True;True;True;True;True;True	1543;3045;11850;12549;14887;14920	3512;3513;6665;25651;27246;32757;32812
E7EPB3;P50914	E7EPB3;P50914	5;5	5;5	5;5	60S ribosomal protein L14	RPL14	>tr|E7EPB3|E7EPB3_HUMAN 60S ribosomal protein L14 OS=Homo sapiens GN=RPL14 PE=1 SV=1;>sp|P50914|RL14_HUMAN 60S ribosomal protein L14 OS=Homo sapiens GN=RPL14 PE=1 SV=4	2	5	5	5	42.7	42.7	42.7	14.558	124	124;215	0	29.785	0.24852	1.0305	9.2363	8	0	Median	0.96257	0.97804	4.0047	8	0	Median	3.8908	0.97654	6.4614	8	0	Median	1051100000	472830000	121100000	457160000				467	1105;1954;9053;9637;13424	True;True;True;True;True	1144;2015;9310;9971;13889	2574;2575;4511;20656;20657;21950;21951;30226;30227
E7ES33;E7EPK1;Q16181;G3V1Q4;H0Y3Y4;Q5JXL7;Q6ZU15	E7ES33;E7EPK1;Q16181;G3V1Q4;H0Y3Y4	7;7;7;6;5;2;1	7;7;7;6;5;2;1	7;7;7;6;5;2;1	Septin-7	2007-09-01	>tr|E7ES33|E7ES33_HUMAN Septin-7 OS=Homo sapiens GN=SEPT7 PE=1 SV=3;>tr|E7EPK1|E7EPK1_HUMAN Septin-7 OS=Homo sapiens GN=SEPT7 PE=1 SV=2;>sp|Q16181|SEPT7_HUMAN Septin-7 OS=Homo sapiens GN=SEPT7 PE=1 SV=2;>tr|G3V1Q4|G3V1Q4_HUMAN Septin 7, isoform CRA_a OS=Ho	7	7	7	7	24.9	24.9	24.9	48.715	417	417;437;437;384;373;88;432	0	62.567	0.2472	0.98957	12.84	13	0	Median	0.93985	0.95857	3.4656	13	0	Median	3.822	0.98699	12.028	13	0	Median	485740000	216540000	57500000	211700000				468	331;8015;9959;9962;12090;12598;14235	True;True;True;True;True;True;True	341;8244;10314;10317;12505;13033;14740	653;18226;18227;18228;22601;22602;22603;22607;27139;27140;28280;32381;32382
E7EPN9;Q9Y520;A0A0A0MS30;H7C5N8	E7EPN9;Q9Y520	3;3;1;1	3;3;1;1	3;3;1;1	Protein PRRC2C	PRRC2C	>tr|E7EPN9|E7EPN9_HUMAN Protein PRRC2C OS=Homo sapiens GN=PRRC2C PE=1 SV=1;>sp|Q9Y520|PRC2C_HUMAN Protein PRRC2C OS=Homo sapiens GN=PRRC2C PE=1 SV=4	4	3	3	3	1.2	1.2	1.2	308.77	2819	2819;2896;299;1300	0	2.8321	0.29607	1.1117	25.741	4	3	Median	0.91796	0.84415	32.721	4	3	Median	3.1004	0.78394	55.63	4	3	Median	9419300	4546600	1421400	3451400				469	6430;9700;12033	True;True;True	6606;10045;12447	14401;14402;22083;27003
E7EPT4;P19404	E7EPT4;P19404	3;3	3;3	3;3	NADH dehydrogenase [ubiquinone] flavoprotein 2, mitochondrial	NDUFV2	>tr|E7EPT4|E7EPT4_HUMAN NADH dehydrogenase [ubiquinone] flavoprotein 2, mitochondrial OS=Homo sapiens GN=NDUFV2 PE=1 SV=1;>sp|P19404|NDUV2_HUMAN NADH dehydrogenase [ubiquinone] flavoprotein 2, mitochondrial OS=Homo sapiens GN=NDUFV2 PE=1 SV=2	2	3	3	3	13.5	13.5	13.5	27.907	252	252;249	0	6.454	0.20821	0.85497	20.329	3	1	Median	1.1037	1.1347	5.1548	3	1	Plateau	5.089	1.2817	14.482	3	1	Median	33609000	13924000	3785800	15899000				470	35;2189;10178	True;True;True	37;2258;10544	59;60;5034;23063
E7EQ69;Q9GZZ1;A0A087WWJ2;C9J5D1;B0AZT5;C9J5J3;A0A0D9SF32;F8WCK0;C9JZU6	E7EQ69;Q9GZZ1;A0A087WWJ2;C9J5D1;B0AZT5	10;10;8;8;7;4;4;1;1	10;10;8;8;7;4;4;1;1	10;10;8;8;7;4;4;1;1	N-alpha-acetyltransferase 50	NAA50	>tr|E7EQ69|E7EQ69_HUMAN N-alpha-acetyltransferase 50 OS=Homo sapiens GN=NAA50 PE=1 SV=1;>sp|Q9GZZ1|NAA50_HUMAN N-alpha-acetyltransferase 50 OS=Homo sapiens GN=NAA50 PE=1 SV=1;>tr|A0A087WWJ2|A0A087WWJ2_HUMAN N-alpha-acetyltransferase 50 OS=Homo sapiens GN=N	9	10	10	10	47.6	47.6	47.6	19.311	168	168;169;81;129;95;58;58;48;57	0	45.514	0.2376	0.94406	13.571	7	0	Median	1.013	1.041	3.6387	7	0	Median	4.4392	1.0934	14.664	7	0	Median	140250000	58419000	17092000	64743000				471	3660;3661;5731;5735;7450;9267;9990;9991;10881;14324	True;True;True;True;True;True;True;True;True;True	3757;3758;5878;5882;7665;9531;10346;10347;11265;14831	8112;8113;8114;12791;12796;16747;21141;22661;22662;24485;32600
F5GX39;E7EQ72;Q15363	F5GX39;E7EQ72;Q15363	1;1;1	1;1;1	1;1;1	Transmembrane emp24 domain-containing protein 2	TMED2	>tr|F5GX39|F5GX39_HUMAN Transmembrane emp24 domain-containing protein 2 OS=Homo sapiens GN=TMED2 PE=1 SV=1;>tr|E7EQ72|E7EQ72_HUMAN Transmembrane emp24 domain-containing protein 2 (Fragment) OS=Homo sapiens GN=TMED2 PE=1 SV=2;>sp|Q15363|TMED2_HUMAN Transmem	3	1	1	1	11.2	11.2	11.2	13.631	116	116;166;201	0	3.579	NaN	NaN	NaN	1	0	Median	NaN	NaN	NaN	1	0	Median	NaN	NaN	NaN	1	0	Median	4674000	2139700	495660	2038600				472	6662	TRUE	6850	14942
E7EQG2;Q14240;E7EMV8;J3KSN7;E9PBH4;F8WE11	E7EQG2;Q14240	11;11;2;2;1;1	1;1;0;0;0;0	1;1;0;0;0;0	Eukaryotic initiation factor 4A-II;Eukaryotic initiation factor 4A-II, N-terminally processed	EIF4A2	>tr|E7EQG2|E7EQG2_HUMAN Eukaryotic initiation factor 4A-II OS=Homo sapiens GN=EIF4A2 PE=1 SV=1;>sp|Q14240|IF4A2_HUMAN Eukaryotic initiation factor 4A-II OS=Homo sapiens GN=EIF4A2 PE=1 SV=2	6	11	1	1	30.4	4.1	4.1	41.29	362	362;407;98;109;96;97	0.0027548	1.1901	0.32913	1.2026	15.431	2	0	Median	1.112	1.1238	8.7093	2	0	Median	3.2928	0.90078	11.972	2	0	Median	73419000	30036000	12381000	31002000				473	4552;4553;4624;5209;7188;8599;9449;10908;13619;13620;14072	False;False;False;False;False;True;False;False;False;False;False	4674;4675;4749;5345;7390;8843;9747;11293;14088;14089;14565	10033;10034;10035;10206;10207;10208;10209;10210;10211;11506;11507;16034;19652;19653;21546;21547;24529;24530;24531;30694;30695;32001;32002;32003;32004;32005;32006;32007
E7EQI7;Q12768	E7EQI7;Q12768	1;1	1;1	1;1	WASH complex subunit strumpellin	KIAA0196	>tr|E7EQI7|E7EQI7_HUMAN WASH complex subunit strumpellin OS=Homo sapiens GN=KIAA0196 PE=1 SV=1;>sp|Q12768|STRUM_HUMAN WASH complex subunit strumpellin OS=Homo sapiens GN=KIAA0196 PE=1 SV=1	2	1	1	1	1.1	1.1	1.1	117.06	1011	1011;1159	0.0036347	1.1238	NaN	NaN	NaN	1	1	Median	NaN	NaN	NaN	1	1	Median	NaN	NaN	NaN	1	1	Median	2641100	1100500	343300	1197300				474	7408	TRUE	7622	16633
E7EQR4;P15311;E9PNP4	E7EQR4;P15311	33;33;1	24;24;0	22;22;0	Ezrin	EZR	>tr|E7EQR4|E7EQR4_HUMAN Ezrin OS=Homo sapiens GN=EZR PE=1 SV=3;>sp|P15311|EZRI_HUMAN Ezrin OS=Homo sapiens GN=EZR PE=1 SV=4	3	33	24	22	59.6	46.9	45.6	69.371	586	586;586;52	0	133.99	0.26267	1.1094	14.157	35	0	Median	1.0576	1.0426	7.1288	35	0	Median	3.9414	0.95994	12.302	35	0	Median	2519400000	1062900000	306620000	1149800000				475	814;1056;1220;1311;2865;3136;3197;3347;3451;3652;4077;4078;4129;4812;5036;5551;5571;5833;6183;6397;6784;6853;7643;10426;10577;10603;10604;10683;10903;10906;11894;12600;14598	True;True;False;True;True;True;True;True;True;True;False;False;True;True;True;True;True;False;True;True;False;True;False;True;False;True;True;True;True;False;True;True;False	846;1093;1268;1360;2952;3229;3291;3442;3548;3749;4187;4188;4239;4939;5168;5695;5715;5984;6343;6571;6974;7047;7865;10803;10958;10984;10985;11066;11287;11290;11291;12308;13035;13036;15112	1877;1878;1879;2469;2814;2815;2816;2817;3012;3013;3014;3015;6440;6441;6442;7029;7030;7031;7032;7128;7129;7461;7667;7668;7669;8095;8096;8097;8974;8975;8976;8977;9068;9069;9070;10659;11147;11148;12421;12422;12423;12457;13023;13024;13025;13026;13027;13028;13868;14334;15173;15174;15311;17239;17240;17241;23535;23816;23817;23888;23889;24032;24520;24521;24524;24525;24526;24527;26734;26735;26736;28282;28…
E7ES08;E7EQU1;O15347;E9PES6	E7ES08;E7EQU1;O15347;E9PES6	5;5;5;4	5;5;5;4	5;5;5;4	High mobility group protein B3	HMGB3	>tr|E7ES08|E7ES08_HUMAN High mobility group protein B3 (Fragment) OS=Homo sapiens GN=HMGB3 PE=1 SV=1;>tr|E7EQU1|E7EQU1_HUMAN High mobility group protein B3 (Fragment) OS=Homo sapiens GN=HMGB3 PE=1 SV=1;>sp|O15347|HMGB3_HUMAN High mobility group protein B3	4	5	5	5	19.7	19.7	19.7	21.444	188	188;193;200;153	0	12.788	0.2748	1.1704	71.327	3	0	Median	1.0854	1.0986	4.8863	3	0	Median	3.8695	0.92264	68.026	3	0	Median	119140000	47937000	19467000	51739000				476	7095;7096;10099;12107;14995	True;True;True;True;True	7293;7294;10462;12524;15523	15771;15772;22932;27185;34213;34214
E7EQV9;P61313;E7EX53;E7ENU7;E7ERA2	E7EQV9;P61313;E7EX53;E7ENU7	5;5;4;4;1	5;5;4;4;1	5;5;4;4;1	Ribosomal protein L15;60S ribosomal protein L15	RPL15	>tr|E7EQV9|E7EQV9_HUMAN Ribosomal protein L15 (Fragment) OS=Homo sapiens GN=RPL15 PE=1 SV=1;>sp|P61313|RL15_HUMAN 60S ribosomal protein L15 OS=Homo sapiens GN=RPL15 PE=1 SV=2;>tr|E7EX53|E7EX53_HUMAN Ribosomal protein L15 (Fragment) OS=Homo sapiens GN=RPL15	5	5	5	5	28.2	28.2	28.2	20.51	174	174;204;133;175;59	0	22.322	0.14538	0.59059	26.781	5	0	Median	0.95119	0.98837	23.384	5	0	Median	6.5576	1.6898	12.143	5	0	Median	378400000	175990000	26865000	175550000				477	3610;10498;11682;14112;15134	True;True;True;True;True	3707;10879;12090;14608;15665	8013;23689;23690;26250;26251;26252;32100;34556;34557
E7ERY9;P20020;Q16720;P23634;H0YDG5;H7BZS8;H7BY13;H0YHH6;H0Y7S3;Q01814	E7ERY9;P20020;Q16720;P23634	3;3;2;2;1;1;1;1;1;1	3;3;2;2;1;1;1;1;1;1	3;3;2;2;1;1;1;1;1;1	Calcium-transporting ATPase;Plasma membrane calcium-transporting ATPase 1;Plasma membrane calcium-transporting ATPase 3;Plasma membrane calcium-transporting ATPase 4	ATP2B1;ATP2B3;ATP2B4	>tr|E7ERY9|E7ERY9_HUMAN Calcium-transporting ATPase OS=Homo sapiens GN=ATP2B1 PE=1 SV=2;>sp|P20020|AT2B1_HUMAN Plasma membrane calcium-transporting ATPase 1 OS=Homo sapiens GN=ATP2B1 PE=1 SV=3;>sp|Q16720|AT2B3_HUMAN Plasma membrane calcium-transporting ATP	10	3	3	3	4.4	4.4	4.4	106.86	963	963;1258;1220;1241;102;117;129;162;1099;1243	0	20.319	0.25797	0.99511	11.413	5	4	Median	0.90765	0.85495	7.7324	5	4	Median	4.5679	0.92257	13.07	5	4	Linear	15436000	6926200	2186700	6322900				478	2747;4934;11096	True;True;True	2830;5064;11491	6199;6200;6201;10930;10931;24947
E7ESJ3;Q9UPS8	E7ESJ3;Q9UPS8	1;1	1;1	1;1	Ankyrin repeat domain-containing protein 26	ANKRD26	>tr|E7ESJ3|E7ESJ3_HUMAN Ankyrin repeat domain-containing protein 26 OS=Homo sapiens GN=ANKRD26 PE=1 SV=1;>sp|Q9UPS8|ANR26_HUMAN Ankyrin repeat domain-containing protein 26 OS=Homo sapiens GN=ANKRD26 PE=1 SV=3	2	1	1	1	0.6	0.6	0.6	198.27	1726	1726;1709	0.0071048	0.98051	0.19845	0.90956	23.468	2	0	Median	0.89723	0.94903	1.8804	2	0	Median	4.4249	0.98673	8.1966	2	0	Median	161180000	74429000	17120000	69629000				479	3000	TRUE	3091	6770;6771
E7ESM1;Q92597;E5RJY1	E7ESM1;Q92597;E5RJY1	2;2;1	2;2;1	2;2;1	Protein NDRG1	NDRG1	>tr|E7ESM1|E7ESM1_HUMAN Protein NDRG1 OS=Homo sapiens GN=NDRG1 PE=1 SV=1;>sp|Q92597|NDRG1_HUMAN Protein NDRG1 OS=Homo sapiens GN=NDRG1 PE=1 SV=1;>tr|E5RJY1|E5RJY1_HUMAN Protein NDRG1 OS=Homo sapiens GN=NDRG1 PE=1 SV=1	3	2	2	2	20.6	20.6	20.6	15	141	141;394;103	0	4.552	NaN	NaN	NaN	1	1	Median	NaN	NaN	NaN	1	1	Median	NaN	NaN	NaN	1	1	Median	22390000	16484000	555050	5351600				480	9315;12335	True;True	9579;12761	21232;27657
E7ETU9	E7ETU9	27	27	2		PLOD2	>tr|E7ETU9|E7ETU9_HUMAN Procollagen-lysine,2-oxoglutarate 5-dioxygenase 2 OS=Homo sapiens GN=PLOD2 PE=1 SV=1	1	27	27	2	46.5	46.5	3.7	81.169	703	703	0	142.49	0.15652	0.68452	25.337	26	0	Median	1.016	0.9824	4.7589	26	0	Median	6.2479	1.5536	21.391	26	0	Median	814090000	369110000	69069000	375910000				481	232;2256;2820;2976;3782;4363;4449;5116;5788;5795;5929;6142;6450;6641;6671;6963;7290;8972;9247;10735;11189;13783;14054;14055;14648;14775;15213	True;True;True;True;True;True;True;True;True;True;True;True;True;True;True;True;True;True;True;True;True;True;True;True;True;True;True	237;2325;2906;3067;3885;4478;4567;5249;5937;5944;6080;6299;6627;6829;6859;7160;7496;9227;9511;11118;11584;14258;14259;14547;14548;15166;15297;15745	446;447;448;5152;5153;5154;6360;6732;8408;9583;9584;9585;9586;9587;9588;9589;9805;9806;9807;11314;12896;12897;12898;12899;12911;12912;12913;12914;13236;13237;13766;13767;14445;14446;14447;14448;14887;14888;14889;14955;14956;14957;14958;14959;15524;16343;16344;16345;20464;20465;21107;21108;21109;24155;24156;24157;25107;25108;31109;31110;31111;31112;31113;31114;31115;31116;31117;31966;31967;31968;3…
J3KQ96;E7ETY2;Q13428	J3KQ96;E7ETY2;Q13428	2;2;2	2;2;2	2;2;2	Treacle protein	TCOF1	>tr|J3KQ96|J3KQ96_HUMAN Treacle protein (Fragment) OS=Homo sapiens GN=TCOF1 PE=1 SV=1;>tr|E7ETY2|E7ETY2_HUMAN Treacle protein OS=Homo sapiens GN=TCOF1 PE=1 SV=1;>sp|Q13428|TCOF_HUMAN Treacle protein OS=Homo sapiens GN=TCOF1 PE=1 SV=3	3	2	2	2	1.3	1.3	1.3	144.12	1414	1414;1488;1488	0	2.5522	0.25344	0.98347	23.662	4	3	Median	1.0169	1.0173	12.749	4	3	Median	3.7894	1.0079	20.411	4	3	Median	19558000	8646900	2461700	8449200				482	625;8527	True;True	649;8770	1419;1420;1421;19495
E7EU96;Q5U5J2;P68400;Q8NEV1;A0A087WY74;V9GYW6;V9GYA2;V9GY80	E7EU96;Q5U5J2;P68400;Q8NEV1	11;11;11;10;4;1;1;1	11;11;11;10;4;1;1;1	11;11;11;10;4;1;1;1	Casein kinase II subunit alpha;Casein kinase II subunit alpha 3	CSNK2A1;CSNK2A3	>tr|E7EU96|E7EU96_HUMAN Casein kinase II subunit alpha OS=Homo sapiens GN=CSNK2A1 PE=1 SV=1;>tr|Q5U5J2|Q5U5J2_HUMAN CSNK2A1 protein OS=Homo sapiens GN=CSNK2A1 PE=1 SV=1;>sp|P68400|CSK21_HUMAN Casein kinase II subunit alpha OS=Homo sapiens GN=CSNK2A1 PE=1 S	8	11	11	11	42.6	42.6	42.6	45.31	385	385;397;391;391;118;27;74;80	0	43.799	0.25743	0.92005	13.932	14	0	Median	0.96824	0.97708	3.8874	14	0	Median	3.8322	1.0378	12.035	14	0	Median	777840000	343880000	102470000	331480000				483	895;2726;2727;3478;3862;4073;4491;7924;10627;12905;14057	True;True;True;True;True;True;True;True;True;True;True	927;2808;2809;3575;3967;4183;4612;8149;11008;13358;14550	2055;2056;6165;6166;7730;8571;8968;8969;8970;9888;9889;9890;9891;18002;23925;29012;29013;29014;31972
E7EX73;E9PGM1;E7EUU4;Q04637;A0A0A0MR52;C9JF13;C9J6B6;C9K073;C9J2Z7;H7C044;A0A0A0MSA7;O43432;H7C0V6;F8WCF2;REV__F5H7J8;C9JHW9;REV__Q8NEG2;REV__C9JQZ6;REV__J3KQX6	E7EX73;E9PGM1;E7EUU4;Q04637;A0A0A0MR52	31;31;31;31;25;15;12;9;8;7;5;5;2;1;1;1;1;1;1	31;31;31;31;25;15;12;9;8;7;5;5;2;1;1;1;1;1;1	31;31;31;31;25;15;12;9;8;7;5;5;2;1;1;1;1;1;1	Eukaryotic translation initiation factor 4 gamma 1	EIF4G1	>tr|E7EX73|E7EX73_HUMAN Eukaryotic translation initiation factor 4 gamma 1 OS=Homo sapiens GN=EIF4G1 PE=1 SV=1;>tr|E9PGM1|E9PGM1_HUMAN Eukaryotic translation initiation factor 4 gamma 1 OS=Homo sapiens GN=EIF4G1 PE=1 SV=1;>tr|E7EUU4|E7EUU4_HUMAN Eukaryotic	19	31	31	31	25.8	25.8	25.8	158.64	1436	1436;1513;1560;1599;1395;903;757;869;834;226;1621;1585;180;50;157;160;295;324;340	0	97.851	0.25102	0.97946	13.732	27	0	Median	1.0492	1.1501	6.2928	27	0	Median	4.1556	1.1985	13.619	27	0	Median	577880000	247570000	73419000	256890000				484	123;124;179;776;1041;2660;2767;2769;3260;3261;3727;3850;3947;4488;4494;4758;5009;5016;5126;6401;6556;8020;8021;8376;8661;9374;9542;9856;11161;12947;14333	True;True;True;True;True;True;True;True;True;True;True;True;True;True;True;True;True;True;True;True;True;True;True;True;True;True;True;True;True;True;True	126;127;184;806;1078;2742;2852;2854;3354;3355;3826;3955;4054;4609;4615;4884;5141;5148;5259;6576;6742;8249;8250;8609;8906;9652;9858;10208;11556;13401;14840	218;219;220;320;1801;2444;6017;6243;6246;6247;7233;7234;8251;8547;8734;8735;9883;9895;9896;10509;10510;11099;11114;11115;11336;14341;14721;18316;18317;18318;19158;19159;19778;21365;21721;22385;25064;25065;29131;29132;32648
E7EVA0;P27816;H7C4C5;H0Y2V1;B5MEG9;F8W9U4;H7C456	E7EVA0;P27816	30;30;10;9;9;8;5	30;30;10;9;9;8;5	30;30;10;9;9;8;5	Microtubule-associated protein;Microtubule-associated protein 4	MAP4	>tr|E7EVA0|E7EVA0_HUMAN Microtubule-associated protein OS=Homo sapiens GN=MAP4 PE=1 SV=1;>sp|P27816|MAP4_HUMAN Microtubule-associated protein 4 OS=Homo sapiens GN=MAP4 PE=1 SV=3	7	30	30	30	19.1	19.1	19.1	245.44	2297	2297;1152;493;463;712;828;290	0	142.91	0.30895	1.181	12.121	44	0	Median	1.0113	0.98362	9.6271	44	0	Median	3.2751	0.89355	12.794	44	0	Median	1105600000	468120000	152860000	484660000				485	314;1976;2093;2159;2414;2415;2419;2592;2603;2743;2926;5350;5486;5487;7429;10247;10248;10315;10316;10651;10958;11863;12198;12303;13094;13132;13135;13362;13769;14863	True;True;True;True;True;True;True;True;True;True;True;True;True;True;True;True;True;True;True;True;True;True;True;True;True;True;True;True;True;True	324;2038;2160;2227;2487;2488;2493;2672;2683;2826;3016;5487;5629;5630;7643;10617;10618;10687;10688;11034;11345;12276;12618;12726;13548;13589;13592;13826;14243;15389	630;631;4546;4846;4847;4848;4986;5473;5474;5479;5881;5882;5883;5884;5915;6195;6608;11795;12294;12295;12296;16689;16690;16691;16692;16693;23202;23203;23204;23205;23322;23323;23324;23325;23326;23967;24620;26673;26674;27381;27382;27599;27600;29432;29522;29523;29524;29528;29529;30013;30014;31068;31069;31070;33944;33945
E7EWB4;Q9BPU6	E7EWB4;Q9BPU6	1;1	1;1	1;1	Dihydropyrimidinase-related protein 5	DPYSL5	>tr|E7EWB4|E7EWB4_HUMAN Dihydropyrimidinase-related protein 5 (Fragment) OS=Homo sapiens GN=DPYSL5 PE=1 SV=5;>sp|Q9BPU6|DPYL5_HUMAN Dihydropyrimidinase-related protein 5 OS=Homo sapiens GN=DPYSL5 PE=1 SV=1	2	1	1	1	3.7	3.7	3.7	20.867	190	190;564	0.008359	0.91932	0.23393	0.98812	6.237	3	0	Median	0.94249	0.97151	2.2225	3	0	Median	4.1207	0.96879	3.9059	3	0	Median	1285200000	581980000	139150000	564020000				486	2194	TRUE	2263	5041;5042;5043;5044
E7EWC2;F5H7S7;Q13576	E7EWC2;F5H7S7;Q13576	3;3;3	1;1;1	1;1;1	Ras GTPase-activating-like protein IQGAP2	IQGAP2	>tr|E7EWC2|E7EWC2_HUMAN Ras GTPase-activating-like protein IQGAP2 (Fragment) OS=Homo sapiens GN=IQGAP2 PE=1 SV=1;>tr|F5H7S7|F5H7S7_HUMAN Ras GTPase-activating-like protein IQGAP2 OS=Homo sapiens GN=IQGAP2 PE=1 SV=2;>sp|Q13576|IQGA2_HUMAN Ras GTPase-activat	3	3	1	1	1.7	0.6	0.6	160.33	1402	1402;1525;1575	0.007108	0.98147	0.24677	0.91035	12.868	3	0	Median	1.1133	1.0486	6.2593	3	0	Median	4.6007	1.2173	6.4952	3	0	Median	31775000	13118000	3718400	14938000				487	7935;9684;10591	False;False;True	8160;10027;10972	18017;18018;18019;22055;23854;23855;23856
E7EWW9;P09488;H3BRM6;B9ZVX7;A0A0A0MR85;Q03013;A6NNT0	E7EWW9;P09488;H3BRM6;B9ZVX7;A0A0A0MR85;Q03013	4;4;2;2;2;2;1	4;4;2;2;2;2;1	1;1;1;1;1;1;1	Glutathione S-transferase Mu 1;Glutathione S-transferase Mu 4	GSTM1;GSTM4	>tr|E7EWW9|E7EWW9_HUMAN Glutathione S-transferase Mu 1 OS=Homo sapiens GN=GSTM1 PE=1 SV=1;>sp|P09488|GSTM1_HUMAN Glutathione S-transferase Mu 1 OS=Homo sapiens GN=GSTM1 PE=1 SV=3;>tr|H3BRM6|H3BRM6_HUMAN Glutathione S-transferase Mu 1 (Fragment) OS=Homo sap	7	4	4	1	18.6	18.6	5.5	27.617	237	237;218;102;149;218;218;202	0	18.98	0.091163	0.34002	52.894	7	7	Median	1.8271	1.8878	4.5668	7	7	Median	18.751	5.2189	51.878	7	7	Median	108110000	41089000	2972100	64052000				488	6575;8254;9293;15187	True;True;True;True	6763;8484;9557;15718	14761;14762;18871;21195;34672;34673;34674
E9PH64;E7EWZ0;E9PF49;Q9Y6M9	E9PH64;E7EWZ0;E9PF49;Q9Y6M9	1;1;1;1	1;1;1;1	1;1;1;1	NADH dehydrogenase [ubiquinone] 1 beta subcomplex subunit 9	NDUFB9	>tr|E9PH64|E9PH64_HUMAN NADH dehydrogenase [ubiquinone] 1 beta subcomplex subunit 9 OS=Homo sapiens GN=NDUFB9 PE=1 SV=1;>tr|E7EWZ0|E7EWZ0_HUMAN NADH dehydrogenase [ubiquinone] 1 beta subcomplex subunit 9 OS=Homo sapiens GN=NDUFB9 PE=1 SV=1;>tr|E9PF49|E9PF4	4	1	1	1	8.3	8.3	8.3	20.383	168	168;178;221;179	0	22.226	NaN	NaN	NaN	1	0	Median	NaN	NaN	NaN	1	0	Median	NaN	NaN	NaN	1	0	Median	45882000	19784000	4838200	21260000				489	488	TRUE	505	1062
E7EX17;P23588;F8VX11;F8W0K0;F8VRU1;F8VYE9;F8VSC7;F8VP89	E7EX17;P23588;F8VX11	4;4;3;1;1;1;1;1	4;4;3;1;1;1;1;1	4;4;3;1;1;1;1;1	Eukaryotic translation initiation factor 4B	EIF4B	>tr|E7EX17|E7EX17_HUMAN Eukaryotic translation initiation factor 4B OS=Homo sapiens GN=EIF4B PE=1 SV=1;>sp|P23588|IF4B_HUMAN Eukaryotic translation initiation factor 4B OS=Homo sapiens GN=EIF4B PE=1 SV=2;>tr|F8VX11|F8VX11_HUMAN Eukaryotic translation initi	8	4	4	4	7.8	7.8	7.8	69.697	616	616;611;360;170;175;185;227;275	0	6.8112	0.28798	1.2203	8.0758	4	0	Median	1.0466	1.0862	9.3909	4	0	Median	3.576	0.8738	6.662	4	0	Median	73567000	30510000	10088000	32969000				490	176;8568;10566;13372	True;True;True;True	181;8811;10947;13836	315;316;19585;23796;30036
E7EX90;Q14203;Q6AWB1;E7EWF7;C9J1B7;C9JZA4;C9JTE5;C9JJN7;C9JJD0;C9JUI8;C9JKG6;E9PCY0	E7EX90;Q14203;Q6AWB1	22;21;12;7;2;2;2;2;2;1;1;1	22;21;12;7;2;2;2;2;2;1;1;1	22;21;12;7;2;2;2;2;2;1;1;1	Dynactin subunit 1	DCTN1;DKFZp686E0752	>tr|E7EX90|E7EX90_HUMAN Dynactin subunit 1 OS=Homo sapiens GN=DCTN1 PE=1 SV=1;>sp|Q14203|DCTN1_HUMAN Dynactin subunit 1 OS=Homo sapiens GN=DCTN1 PE=1 SV=3;>tr|Q6AWB1|Q6AWB1_HUMAN Dynactin subunit 1 OS=Homo sapiens GN=DKFZp686E0752 PE=1 SV=1	12	22	22	22	21.2	21.2	21.2	139.09	1256	1256;1278;890;191;64;76;76;87;121;14;135;186	0	114.42	0.25256	0.981	12.379	19	0	Median	1.0055	0.94712	5.3084	19	0	Median	4.0205	1.007	13.112	19	0	Median	232470000	98249000	30144000	104070000				491	387;498;1473;2307;2318;2513;3146;4978;6046;6371;7573;7879;8845;9145;9587;10005;10129;11011;11048;11857;14539;14897	True;True;True;True;True;True;True;True;True;True;True;True;True;True;True;True;True;True;True;True;True;True	401;515;1525;2376;2387;2592;3239;5110;6201;6545;7793;8104;9094;9405;9914;10362;10493;11398;11440;12270;15050;15424	830;1075;1076;3479;3480;5254;5278;5683;7043;11019;13544;13545;13546;14269;14270;17107;17880;20175;20821;21844;22694;22979;24758;24832;26666;33138;34005
E7EXA3;Q6X734;Q9GZT8	E7EXA3;Q6X734;Q9GZT8	1;1;1	1;1;1	1;1;1	NIF3-like protein 1	NIF3L1	>tr|E7EXA3|E7EXA3_HUMAN NIF3-like protein 1 (Fragment) OS=Homo sapiens GN=NIF3L1 PE=1 SV=1;>tr|Q6X734|Q6X734_HUMAN NIF3-like protein 1 OS=Homo sapiens GN=NIF3L1 PE=1 SV=1;>sp|Q9GZT8|GTPC1_HUMAN NIF3-like protein 1 OS=Homo sapiens GN=NIF3L1 PE=1 SV=2	3	1	1	1	5.3	5.3	5.3	23.578	209	209;252;377	0.0014493	1.563	0.26288	0.98986	14.728	2	0	Median	0.91614	0.87841	8.8899	2	0	Median	3.5131	0.89274	19.686	2	0	Median	19190000	8140600	2890500	8159100				492	1023	TRUE	1060	2407;2408
F8VZJ2;H0YHX9;Q13765;E9PAV3;F8W1N5;F8VNW4;F8W0W4;F8VZ58;Q9BZK3	F8VZJ2;H0YHX9;Q13765;E9PAV3;F8W1N5;F8VNW4;F8W0W4	4;4;4;4;3;3;3;1;1	4;4;4;4;3;3;3;1;1	4;4;4;4;3;3;3;1;1	Nascent polypeptide-associated complex subunit alpha;Nascent polypeptide-associated complex subunit alpha, muscle-specific form	NACA	>tr|F8VZJ2|F8VZJ2_HUMAN Nascent polypeptide-associated complex subunit alpha OS=Homo sapiens GN=NACA PE=1 SV=1;>tr|H0YHX9|H0YHX9_HUMAN Nascent polypeptide-associated complex subunit alpha (Fragment) OS=Homo sapiens GN=NACA PE=1 SV=1;>sp|Q13765|NACA_HUMAN N	9	4	4	4	43.4	43.4	43.4	15.016	136	136;213;215;2078;71;148;198;126;213	0	57.014	0.2719	1.1254	6.1943	6	0	Median	1.0047	0.99588	8.8975	6	0	Median	3.7165	0.91969	10.04	6	0	Median	211440000	93490000	27416000	90534000				493	5705;10084;11530;11807	True;True;True;True	5852;10447;11938;12219	12735;12736;22897;25872;25873;26534;26535
E9PB90;P52789	E9PB90;P52789	5;5	3;3	3;3	Hexokinase;Hexokinase-2	HK2	>tr|E9PB90|E9PB90_HUMAN Hexokinase OS=Homo sapiens GN=HK2 PE=1 SV=1;>sp|P52789|HXK2_HUMAN Hexokinase-2 OS=Homo sapiens GN=HK2 PE=1 SV=2	2	5	3	3	7	4.4	4.4	98.972	889	889;917	0	5.1753	0.16833	0.66973	69.78	4	2	Median	0.84425	0.83968	9.0334	4	2	Median	4.6234	1.1658	63.567	4	2	Median	29459000	13830000	4671600	10957000				494	4143;4145;4705;7791;9490	True;False;True;True;False	4253;4255;4256;4831;8014;9793	9093;9095;9096;10394;10395;17697;21613
E9PBY7;E9PQ61;O75152	E9PBY7;E9PQ61;O75152	1;1;1	1;1;1	1;1;1	Zinc finger CCCH domain-containing protein 11A	ZC3H11A	>tr|E9PBY7|E9PBY7_HUMAN Zinc finger CCCH domain-containing protein 11A (Fragment) OS=Homo sapiens GN=ZC3H11A PE=1 SV=1;>tr|E9PQ61|E9PQ61_HUMAN Zinc finger CCCH domain-containing protein 11A OS=Homo sapiens GN=ZC3H11A PE=1 SV=1;>sp|O75152|ZC11A_HUMAN Zinc f	3	1	1	1	1.7	1.7	1.7	57.427	515	515;652;810	0.0027574	1.1937	NaN	NaN	NaN	1	1	Median	NaN	NaN	NaN	1	1	Median	NaN	NaN	NaN	1	1	Median	3418200	1445500	363730	1609000				495	12758	TRUE	13200	28653
E9PC74;Q13144	E9PC74;Q13144	1;1	1;1	1;1	Translation initiation factor eIF-2B subunit epsilon	EIF2B5	>tr|E9PC74|E9PC74_HUMAN Translation initiation factor eIF-2B subunit epsilon OS=Homo sapiens GN=EIF2B5 PE=1 SV=1;>sp|Q13144|EI2BE_HUMAN Translation initiation factor eIF-2B subunit epsilon OS=Homo sapiens GN=EIF2B5 PE=1 SV=3	2	1	1	1	1.4	1.4	1.4	78.346	705	705;721	0.00050352	1.9657	NaN	NaN	NaN	1	0	Median	NaN	NaN	NaN	1	0	Median	NaN	NaN	NaN	1	0	Median	6855100	3036000	721950	3097200				496	14946	TRUE	15474	34125
E9PFG7;E9PDF2;E9PCR7;Q02218;A0A0D9SFS3;Q9ULD0	E9PFG7;E9PDF2;E9PCR7;Q02218;A0A0D9SFS3	7;7;7;7;5;2	7;7;7;7;5;2	7;7;7;7;5;2	2-oxoglutarate dehydrogenase, mitochondrial	OGDH	>tr|E9PFG7|E9PFG7_HUMAN 2-oxoglutarate dehydrogenase, mitochondrial OS=Homo sapiens GN=OGDH PE=1 SV=1;>tr|E9PDF2|E9PDF2_HUMAN 2-oxoglutarate dehydrogenase, mitochondrial OS=Homo sapiens GN=OGDH PE=1 SV=1;>tr|E9PCR7|E9PCR7_HUMAN 2-oxoglutarate dehydrogenase	6	7	7	7	9.6	9.6	9.6	99.015	873	873;1034;1038;1023;1001;1010	0	15.288	0.2081	0.89772	2.8571	3	0	Median	1.1884	1.152	3.4054	3	0	Median	5.6115	1.34	6.0675	3	0	Median	46095000	19162000	5046500	21887000				497	3676;5739;7112;8139;8140;12023;14699	True;True;True;True;True;True;True	3774;5886;7310;8369;8370;12437;15218	8133;12800;15807;18599;18600;26991;33617
E9PCT5;Q03135;C9JKI3;P56539	E9PCT5;Q03135;C9JKI3;P56539	2;2;1;1	2;2;1;1	2;2;1;1	Caveolin;Caveolin-1;Caveolin-3	CAV1;CAV3	>tr|E9PCT5|E9PCT5_HUMAN Caveolin OS=Homo sapiens GN=CAV1 PE=1 SV=1;>sp|Q03135|CAV1_HUMAN Caveolin-1 OS=Homo sapiens GN=CAV1 PE=1 SV=4;>tr|C9JKI3|C9JKI3_HUMAN Caveolin (Fragment) OS=Homo sapiens GN=CAV1 PE=1 SV=1;>sp|P56539|CAV3_HUMAN Caveolin-3 OS=Homo sap	4	2	2	2	11.4	11.4	11.4	19.177	167	167;178;138;151	0.0023234	1.2657	0.33859	1.3052	18.777	3	1	Median	1.0742	1.1182	15.633	3	1	Plateau	3.2241	0.78331	25.843	3	1	Plateau	24353000	10572000	4229000	9551200				498	1140;2922	True;True	1180;3012	2630;6598;6599
E9PCY5;Q02880	E9PCY5;Q02880	5;5	3;3	3;3	DNA topoisomerase 2;DNA topoisomerase 2-beta	TOP2B	>tr|E9PCY5|E9PCY5_HUMAN DNA topoisomerase 2 (Fragment) OS=Homo sapiens GN=TOP2B PE=1 SV=1;>sp|Q02880|TOP2B_HUMAN DNA topoisomerase 2-beta OS=Homo sapiens GN=TOP2B PE=1 SV=3	2	5	3	3	4.8	3.2	3.2	130.48	1150	1150;1626	0	8.6296	0.23193	0.90814	2.2963	3	1	Median	1.2317	1.2794	2.5471	3	1	Plateau	5.2744	1.4237	6.6532	3	1	Median	9145200	3934000	935940	4275300				499	181;2335;3435;7470;8206	True;True;False;False;True	186;2404;3532;7686;8436	323;5311;7621;16803;16804;18745
E9PD53;Q9NTJ3;C9JR83;C9J9E4;C9JVD8;C9J578;C9JWF0;C9IYK2;C9JJ64	E9PD53;Q9NTJ3	18;18;5;4;3;3;1;1;1	18;18;5;4;3;3;1;1;1	18;18;5;4;3;3;1;1;1	Structural maintenance of chromosomes protein;Structural maintenance of chromosomes protein 4	SMC4	>tr|E9PD53|E9PD53_HUMAN Structural maintenance of chromosomes protein OS=Homo sapiens GN=SMC4 PE=1 SV=1;>sp|Q9NTJ3|SMC4_HUMAN Structural maintenance of chromosomes protein 4 OS=Homo sapiens GN=SMC4 PE=1 SV=2	9	18	18	18	16.1	16.1	16.1	144.45	1263	1263;1288;423;157;119;139;170;173;180	0	45.709	0.21831	0.80537	19.57	15	0	Median	1.1627	1.1099	10.652	15	0	Median	5.4431	1.4702	15.812	15	0	Median	217890000	87749000	24526000	105610000				500	2448;4038;5943;6305;6992;9010;10000;10224;10565;10640;11401;11570;11712;11772;11791;13325;13877;13994	True;True;True;True;True;True;True;True;True;True;True;True;True;True;True;True;True;True	2525;4148;6094;6478;7189;9266;10357;10593;10946;11023;11807;11978;12120;12184;12203;13788;14360;14484	5563;5564;8921;8922;13255;14126;15578;20532;22685;23167;23795;23950;25576;25966;25967;26330;26465;26500;29927;31439;31440;31771
E9PDF6;O43795;E7EQD9;C9JYW1;H7C2Y7;C9JUP5;C9K0I9	E9PDF6;O43795	21;21;8;5;5;3;1	21;21;8;5;5;3;1	18;18;6;3;5;2;1	Unconventional myosin-Ib	MYO1B	>tr|E9PDF6|E9PDF6_HUMAN Unconventional myosin-Ib OS=Homo sapiens GN=MYO1B PE=1 SV=1;>sp|O43795|MYO1B_HUMAN Unconventional myosin-Ib OS=Homo sapiens GN=MYO1B PE=1 SV=3	7	21	21	18	24.7	24.7	22.8	128.48	1107	1107;1136;303;163;192;149;83	0	85.505	0.18806	0.71896	10.182	17	0	Median	1.0444	0.97756	3.8407	17	0	Median	5.5054	1.4027	10.313	17	0	Median	385070000	169480000	41567000	174020000				501	84;1135;3232;3815;4166;4279;5782;5968;6713;7688;7818;8474;9155;9830;11256;11382;11669;11957;14230;15193;15289	True;True;True;True;True;True;True;True;True;True;True;True;True;True;True;True;True;True;True;True;True	87;1175;3326;3919;4278;4393;5931;6120;6901;7910;8042;8714;9415;10182;11656;11788;12077;12371;14735;15724;15830	138;139;2623;7185;7186;8487;9144;9410;9411;12888;13315;15037;17329;17330;17746;19390;19391;20835;22339;25260;25514;25515;26233;26862;32356;34683;34933
H7C2F5;H3BLS9;H0YLQ3;E9PDP5;H0YM23;Q8IWZ3;O75179	H7C2F5;H3BLS9;H0YLQ3;E9PDP5;H0YM23;Q8IWZ3;O75179	1;1;1;1;1;1;1	1;1;1;1;1;1;1	1;1;1;1;1;1;1	Ankyrin repeat and KH domain-containing protein 1;Ankyrin repeat domain-containing protein 17	ANKHD1;ANKRD17	>tr|H7C2F5|H7C2F5_HUMAN Ankyrin repeat and KH domain-containing protein 1 (Fragment) OS=Homo sapiens GN=ANKHD1 PE=1 SV=1;>tr|H3BLS9|H3BLS9_HUMAN Ankyrin repeat and KH domain-containing protein 1 (Fragment) OS=Homo sapiens GN=ANKHD1 PE=1 SV=1;>tr|H0YLQ3|H0Y	7	1	1	1	3.5	3.5	3.5	64.914	608	608;687;862;1565;2487;2542;2603	0	5.6	NaN	NaN	NaN	1	1	Median	NaN	NaN	NaN	1	1	Median	NaN	NaN	NaN	1	1	Median	2851600	779160	279030	1793400				502	10303	TRUE	10674	23306
E9PDW2;P55809	E9PDW2;P55809	1;1	1;1	1;1	Succinyl-CoA:3-ketoacid coenzyme A transferase 1, mitochondrial	OXCT1	>tr|E9PDW2|E9PDW2_HUMAN Succinyl-CoA:3-ketoacid coenzyme A transferase 1, mitochondrial OS=Homo sapiens GN=OXCT1 PE=1 SV=1;>sp|P55809|SCOT1_HUMAN Succinyl-CoA:3-ketoacid coenzyme A transferase 1, mitochondrial OS=Homo sapiens GN=OXCT1 PE=1 SV=1	2	1	1	1	3.3	3.3	3.3	36.69	334	334;520	0	2.2173	0.18946	0.79375	7.8702	2	2	Median	1.5317	1.5733	3.0931	2	2	Median	8.0846	1.9739	4.7771	2	2	Median	9921500	3895200	574350	5452000				503	12075	TRUE	12490	27095;27096
E9PEB5;Q96AE4;C9JSZ1	E9PEB5;Q96AE4	11;11;4	10;10;4	10;10;4	Far upstream element-binding protein 1	FUBP1	>tr|E9PEB5|E9PEB5_HUMAN Far upstream element-binding protein 1 OS=Homo sapiens GN=FUBP1 PE=1 SV=1;>sp|Q96AE4|FUBP1_HUMAN Far upstream element-binding protein 1 OS=Homo sapiens GN=FUBP1 PE=1 SV=3	3	11	10	10	20.6	19.4	19.4	68.903	655	655;644;232	0	30.175	0.19132	0.76363	9.7972	8	0	Median	1.0202	0.99625	4.4834	8	0	Median	5.0995	1.3124	10.346	8	0	Median	448250000	198670000	45647000	203940000				504	1824;3184;5069;5573;5838;5842;6364;6547;8134;12192;12550	False;True;True;True;True;True;True;True;True;True;True	1881;3278;5201;5718;5989;5993;6538;6732;8364;12612;12984	4232;4233;7101;11205;12461;13034;13066;14256;14706;18592;27373;28137
E9PEJ4;P10515;H0YDD4	E9PEJ4;P10515;H0YDD4	2;2;1	2;2;1	2;2;1	Acetyltransferase component of pyruvate dehydrogenase complex;Dihydrolipoyllysine-residue acetyltransferase component of pyruvate dehydrogenase complex, mitochondrial	DLAT	>tr|E9PEJ4|E9PEJ4_HUMAN Acetyltransferase component of pyruvate dehydrogenase complex OS=Homo sapiens GN=DLAT PE=1 SV=1;>sp|P10515|ODP2_HUMAN Dihydrolipoyllysine-residue acetyltransferase component of pyruvate dehydrogenase complex, mitochondrial OS=Homo s	3	2	2	2	3	3	3	57.586	542	542;647;479	0.0023518	1.3225	0.27657	1.0761	2.449	2	1	Median	1.024	1.0144	4.0177	2	1	Median	3.7093	0.94692	2.6866	2	1	Median	42904000	17125000	5207800	20572000				505	4548;6201	True;True	4670;6361	10025;13900
E9PF10;O75694	E9PF10;O75694	9;9	9;9	9;9	Nuclear pore complex protein Nup155	NUP155	>tr|E9PF10|E9PF10_HUMAN Nuclear pore complex protein Nup155 OS=Homo sapiens GN=NUP155 PE=1 SV=1;>sp|O75694|NU155_HUMAN Nuclear pore complex protein Nup155 OS=Homo sapiens GN=NUP155 PE=1 SV=1	2	9	9	9	8.1	8.1	8.1	148.09	1327	1327;1391	0	21.388	0.28875	1.1483	10.43	5	0	Median	1.0942	0.97966	4.904	5	0	Median	3.8165	0.87155	10.643	5	0	Median	44261000	17651000	6216100	20394000				506	1168;1936;2961;4764;6374;6473;8200;13395;15254	True;True;True;True;True;True;True;True;True	1213;1995;3051;4890;6548;6650;8430;13859;15788	2719;4479;6680;10517;14273;14537;18727;30126;34825
F8WFD3;E9PF58;Q92747	F8WFD3;E9PF58;Q92747	1;1;1	1;1;1	1;1;1	Actin-related protein 2/3 complex subunit 1A	ARPC1A	>tr|F8WFD3|F8WFD3_HUMAN Actin-related protein 2/3 complex subunit 1A OS=Homo sapiens GN=ARPC1A PE=1 SV=1;>tr|E9PF58|E9PF58_HUMAN Actin-related protein 2/3 complex subunit 1A OS=Homo sapiens GN=ARPC1A PE=1 SV=1;>sp|Q92747|ARC1A_HUMAN Actin-related protein 2	3	1	1	1	32.1	32.1	32.1	6.0741	53	53;279;370	0	5.1162	NaN	NaN	NaN	1	0	Median	NaN	NaN	NaN	1	0	Median	NaN	NaN	NaN	1	0	Median	20271000	9245400	2468900	8556300				507	11616	TRUE	12024	26057
E9PFN5;Q9Y2Q3;C9JNT3	E9PFN5;Q9Y2Q3	5;5;2	5;5;2	5;5;2	Glutathione S-transferase kappa 1	GSTK1	>tr|E9PFN5|E9PFN5_HUMAN Glutathione S-transferase kappa 1 OS=Homo sapiens GN=GSTK1 PE=1 SV=1;>sp|Q9Y2Q3|GSTK1_HUMAN Glutathione S-transferase kappa 1 OS=Homo sapiens GN=GSTK1 PE=1 SV=3	3	5	5	5	33.2	33.2	33.2	21.707	190	190;226;118	0	58.167	0.25341	1.0406	7.8825	3	0	Median	0.95232	0.97008	7.6074	3	0	Median	3.6678	0.92376	7.0704	3	0	Median	98012000	42466000	12083000	43463000				508	611;2103;2501;9784;10138	True;True;True;True;True	633;634;2170;2579;10133;10502	1387;1388;4867;5648;5649;22259;22997;22998
E9PGT1;Q15631;H7C1D4	E9PGT1;Q15631;H7C1D4	3;3;2	3;3;2	3;3;2	Translin	TSN	>tr|E9PGT1|E9PGT1_HUMAN Translin OS=Homo sapiens GN=TSN PE=1 SV=1;>sp|Q15631|TSN_HUMAN Translin OS=Homo sapiens GN=TSN PE=1 SV=1;>tr|H7C1D4|H7C1D4_HUMAN Translin (Fragment) OS=Homo sapiens GN=TSN PE=1 SV=1	3	3	3	3	17	17	17	25.572	223	223;228;185	0	17.514	0.26838	1.0447	23.496	4	0	Median	1.0016	1.0408	3.1022	4	0	Median	3.5607	0.9536	22.989	4	0	Median	60976000	26098000	8231500	26647000				509	2770;4415;14715	True;True;True	2855;4533;15235	6248;6249;9730;9731;33649
E9PGT6;Q99627;H7C3S9	E9PGT6;Q99627;H7C3S9	3;3;2	3;3;2	3;3;2	COP9 signalosome complex subunit 8	COPS8	>tr|E9PGT6|E9PGT6_HUMAN COP9 signalosome complex subunit 8 OS=Homo sapiens GN=COPS8 PE=1 SV=1;>sp|Q99627|CSN8_HUMAN COP9 signalosome complex subunit 8 OS=Homo sapiens GN=COPS8 PE=1 SV=1;>tr|H7C3S9|H7C3S9_HUMAN COP9 signalosome complex subunit 8 (Fragment)	3	3	3	3	28.9	28.9	28.9	19.344	173	173;209;83	0	27.58	0.2805	1.0231	3.733	3	0	Median	1.0191	1.0425	4.7848	3	0	Median	3.8623	1.0256	9.7323	3	0	Median	57041000	24705000	7350000	24986000				510	3741;4577;11086	True;True;True	3840;4700;11481	8278;10085;24934
E9PGZ1;E7EX44;Q05682;C9J813;C9JEK3;REV__H0YH95;REV__H0YEF9;REV__E9PJZ7;REV__H0YHK3;REV__Q13136;REV__G3V200;REV__O75334	E9PGZ1;E7EX44;Q05682;C9J813	9;8;8;7;1;1;1;1;1;1;1;1	9;8;8;7;1;1;1;1;1;1;1;1	9;8;8;7;1;1;1;1;1;1;1;1	Caldesmon	CALD1	>tr|E9PGZ1|E9PGZ1_HUMAN Caldesmon OS=Homo sapiens GN=CALD1 PE=1 SV=1;>tr|E7EX44|E7EX44_HUMAN Caldesmon OS=Homo sapiens GN=CALD1 PE=1 SV=1;>sp|Q05682|CALD1_HUMAN Caldesmon OS=Homo sapiens GN=CALD1 PE=1 SV=3;>tr|C9J813|C9J813_HUMAN Caldesmon (Fragment) OS=Ho	12	9	9	9	22	22	22	61.705	536	536;557;793;459;132;284;387;583;1104;1202;1247;1257	0	25.667	0.2631	1.0732	35.664	14	0	Median	0.72421	0.74177	14.337	14	0	Median	3.0608	0.77248	38.429	14	0	Median	316180000	156800000	42376000	117010000				511	1516;2675;4859;5687;6256;8634;9596;10867;11075	True;True;True;True;True;True;True;True;True	1568;2757;4988;5834;6427;8878;9927;11251;11469	3553;6060;10768;10769;12693;14027;14028;19732;21864;24384;24894;24895;24896;24897
E9PHM2;Q15031	E9PHM2;Q15031	3;3	3;3	3;3	Probable leucine--tRNA ligase, mitochondrial	LARS2	>tr|E9PHM2|E9PHM2_HUMAN Probable leucine--tRNA ligase, mitochondrial OS=Homo sapiens GN=LARS2 PE=1 SV=1;>sp|Q15031|SYLM_HUMAN Probable leucine--tRNA ligase, mitochondrial OS=Homo sapiens GN=LARS2 PE=1 SV=2	2	3	3	3	3.4	3.4	3.4	96.93	860	860;903	0	2.9693	0.36927	1.485	61.427	2	2	Median	0.96235	0.92957	5.2668	2	2	Median	2.6061	0.66804	63.821	2	2	Median	7193500	2780900	1272800	3139800				512	306;6327;12314	True;True;True	315;6500;12738	594;14157;27624
F8WDS9;E9PHS0;O43813	F8WDS9;E9PHS0;O43813	1;1;1	1;1;1	1;1;1	LanC-like protein 1	LANCL1	>tr|F8WDS9|F8WDS9_HUMAN LanC-like protein 1 OS=Homo sapiens GN=LANCL1 PE=1 SV=1;>tr|E9PHS0|E9PHS0_HUMAN LanC-like protein 1 (Fragment) OS=Homo sapiens GN=LANCL1 PE=1 SV=1;>sp|O43813|LANC1_HUMAN LanC-like protein 1 OS=Homo sapiens GN=LANCL1 PE=1 SV=1	3	1	1	1	14.6	14.6	14.6	9.2824	82	82;196;399	0	3.6621	NaN	NaN	NaN	1	0	Median	NaN	NaN	NaN	1	0	Median	NaN	NaN	NaN	1	0	Median	14387000	5750800	1535800	7100100				513	11543	TRUE	11951	25892
E9PHY5;O43491;E9PJP4;E9PQN0;E9PRG1;E9PIG0;E9PQD2;Q6ZSX4;E9PN54;Q6R5J7;I6L9B1;E9PII3;E9PK52	E9PHY5;O43491;E9PJP4;E9PQN0;E9PRG1;E9PIG0;E9PQD2;Q6ZSX4;E9PN54;Q6R5J7;I6L9B1;E9PII3;E9PK52	2;2;1;1;1;1;1;1;1;1;1;1;1	2;2;1;1;1;1;1;1;1;1;1;1;1	2;2;1;1;1;1;1;1;1;1;1;1;1	Band 4.1-like protein 2	EPB41L2	>tr|E9PHY5|E9PHY5_HUMAN Band 4.1-like protein 2 OS=Homo sapiens GN=EPB41L2 PE=1 SV=1;>sp|O43491|E41L2_HUMAN Band 4.1-like protein 2 OS=Homo sapiens GN=EPB41L2 PE=1 SV=1;>tr|E9PJP4|E9PJP4_HUMAN Band 4.1-like protein 2 (Fragment) OS=Homo sapiens GN=EPB41L2 P	13	2	2	2	2.4	2.4	2.4	104.36	935	935;1005;118;127;153;162;179;201;240;383;633;706;811	0	2.3501	0.4699	1.8826	1.032	2	0	Median	1.269	1.2052	0.39282	2	0	Median	2.9512	0.78083	3.4953	2	0	Median	6959900	2671200	1196200	3092600				514	3415;13098	True;True	3512;13552	7591;29436
E9PI14;Q9NX20	E9PI14;Q9NX20	2;2	2;2	2;2	39S ribosomal protein L16, mitochondrial	MRPL16	>tr|E9PI14|E9PI14_HUMAN 39S ribosomal protein L16, mitochondrial (Fragment) OS=Homo sapiens GN=MRPL16 PE=1 SV=1;>sp|Q9NX20|RM16_HUMAN 39S ribosomal protein L16, mitochondrial OS=Homo sapiens GN=MRPL16 PE=1 SV=1	2	2	2	2	24.4	24.4	24.4	9.5822	86	86;251	0	2.7869	0.21523	0.91669	8.8455	3	2	Median	0.93507	0.94644	7.3539	3	2	Median	4.0218	0.95896	5.6131	3	2	Median	43051000	19788000	4527900	18734000				515	4185;14277	True;True	4297;14784	9201;9202;32504
E9PI78;E9PNF1;Q13405	E9PI78;E9PNF1;Q13405	1;1;1	1;1;1	1;1;1	39S ribosomal protein L49, mitochondrial	MRPL49	>tr|E9PI78|E9PI78_HUMAN 39S ribosomal protein L49, mitochondrial OS=Homo sapiens GN=MRPL49 PE=1 SV=1;>tr|E9PNF1|E9PNF1_HUMAN 39S ribosomal protein L49, mitochondrial OS=Homo sapiens GN=MRPL49 PE=1 SV=1;>sp|Q13405|RM49_HUMAN 39S ribosomal protein L49, mitoc	3	1	1	1	13.1	13.1	13.1	11.348	99	99;140;166	0	10.78	NaN	NaN	NaN	1	0	Median	NaN	NaN	NaN	1	0	Median	NaN	NaN	NaN	1	0	Median	5174500	2136600	568150	2469700				516	4066	TRUE	4176	8958
E9PSE5;E9PIA8;P50897	E9PSE5;E9PIA8;P50897	1;1;1	1;1;1	1;1;1	Palmitoyl-protein thioesterase 1	PPT1	>tr|E9PSE5|E9PSE5_HUMAN Palmitoyl-protein thioesterase 1 OS=Homo sapiens GN=PPT1 PE=1 SV=1;>tr|E9PIA8|E9PIA8_HUMAN Palmitoyl-protein thioesterase 1 (Fragment) OS=Homo sapiens GN=PPT1 PE=1 SV=6;>sp|P50897|PPT1_HUMAN Palmitoyl-protein thioesterase 1 OS=Homo	3	1	1	1	17.2	17.2	17.2	10.016	87	87;205;306	0.0049372	1.0446	NaN	NaN	NaN	1	1	Median	NaN	NaN	NaN	1	1	Median	NaN	NaN	NaN	1	1	Median	28681000	11662000	3943400	13075000				517	3331	TRUE	3426	7431
E9PIN3;Q9UBU9	E9PIN3;Q9UBU9	1;1	1;1	1;1	Nuclear RNA export factor 1	NXF1	>tr|E9PIN3|E9PIN3_HUMAN Nuclear RNA export factor 1 (Fragment) OS=Homo sapiens GN=NXF1 PE=1 SV=1;>sp|Q9UBU9|NXF1_HUMAN Nuclear RNA export factor 1 OS=Homo sapiens GN=NXF1 PE=1 SV=1	2	1	1	1	2	2	2	68.106	603	603;619	0	3.6459	NaN	NaN	NaN	1	0	Median	NaN	NaN	NaN	1	0	Median	NaN	NaN	NaN	1	0	Median	5422700	2271100	631470	2520100				518	8494	TRUE	8736	19431
E9PIZ4;E9PSD5;E9PPQ5;Q9UHD1	E9PIZ4;E9PSD5;E9PPQ5;Q9UHD1	2;2;2;2	2;2;2;2	2;2;2;2	Cysteine and histidine-rich domain-containing protein 1	CHORDC1	>tr|E9PIZ4|E9PIZ4_HUMAN Cysteine and histidine-rich domain-containing protein 1 OS=Homo sapiens GN=CHORDC1 PE=1 SV=1;>tr|E9PSD5|E9PSD5_HUMAN Cysteine and histidine-rich domain-containing protein 1 OS=Homo sapiens GN=CHORDC1 PE=1 SV=1;>tr|E9PPQ5|E9PPQ5_HUMA	4	2	2	2	25.9	25.9	25.9	13.143	116	116;120;184;332	0.00050556	1.9802	0.40576	1.681	66.77	2	1	Median	0.95696	0.93733	20.451	2	1	Median	2.5502	0.61523	63.186	2	1	Median	33288000	12536000	6238400	14514000				519	5397;13091	True;True	5535;13545	11994;29421
E9PJ95;Q9P000	E9PJ95;Q9P000	1;1	1;1	1;1	COMM domain-containing protein 9	COMMD9	>tr|E9PJ95|E9PJ95_HUMAN COMM domain-containing protein 9 OS=Homo sapiens GN=COMMD9 PE=1 SV=1;>sp|Q9P000|COMD9_HUMAN COMM domain-containing protein 9 OS=Homo sapiens GN=COMMD9 PE=1 SV=2	2	1	1	1	8.6	8.6	8.6	20.687	185	185;198	0	16.344	0.29097	1.219	16.885	3	2	Median	1.005	1.0323	5.6115	3	2	Median	4.6485	1.1406	22.214	3	2	Plateau	13819000	5708700	2196700	5913700				520	127	TRUE	130	223;224;225
E9PJA7;E9PK09;E9PQN2;E9PKI6;E9PK91;Q9NYF8;H0YF00	E9PJA7;E9PK09;E9PQN2;E9PKI6;E9PK91;Q9NYF8;H0YF00	3;3;3;3;3;3;2	3;3;3;3;3;3;2	3;3;3;3;3;3;2	Bcl-2-associated transcription factor 1	BCLAF1	>tr|E9PJA7|E9PJA7_HUMAN Bcl-2-associated transcription factor 1 OS=Homo sapiens GN=BCLAF1 PE=1 SV=1;>tr|E9PK09|E9PK09_HUMAN Bcl-2-associated transcription factor 1 (Fragment) OS=Homo sapiens GN=BCLAF1 PE=1 SV=5;>tr|E9PQN2|E9PQN2_HUMAN Bcl-2-associated tran	7	3	3	3	7.5	7.5	7.5	52.917	467	467;726;750;752;871;920;118	0	3.0594	0.24964	1.0199	16.407	4	2	Median	1.1372	1.0662	2.3835	4	2	Median	4.5791	1.1174	20.187	4	2	Median	30641000	12810000	3988400	13842000				521	9475;11982;12623	True;True;True	9777;12396;13060	21587;26902;26903;28339
E9PJF0;E9PQW4;P27361;H0YDH9;K7ELV1;B3KR49;K7EN18;E9PBK7;P31152;Q16659	E9PJF0;E9PQW4;P27361;H0YDH9;K7ELV1;B3KR49;K7EN18;E9PBK7;P31152;Q16659	2;2;2;1;1;1;1;1;1;1	1;1;1;0;0;0;0;0;0;0	1;1;1;0;0;0;0;0;0;0	Mitogen-activated protein kinase;Mitogen-activated protein kinase 3;Mitogen-activated protein kinase 4;Mitogen-activated protein kinase 6	MAPK3;MAPK4;MAPK6	>tr|E9PJF0|E9PJF0_HUMAN Mitogen-activated protein kinase OS=Homo sapiens GN=MAPK3 PE=1 SV=1;>tr|E9PQW4|E9PQW4_HUMAN Mitogen-activated protein kinase OS=Homo sapiens GN=MAPK3 PE=1 SV=1;>sp|P27361|MK03_HUMAN Mitogen-activated protein kinase 3 OS=Homo sapiens	10	2	1	1	7.6	4.4	4.4	35.737	316	316;339;379;87;233;265;281;311;587;721	0.0027397	1.1565	0.23072	0.79897	1.1811	2	2	Median	0.71193	0.71074	0.38987	2	2	Median	3.0857	0.86056	1.5709	2	2	Median	29000000	14281000	3561900	11157000				522	6;15126	True;False	6;15657	9;10;34541
E9PMI6;E9PJF4;J3KN38;P54105	E9PMI6;E9PJF4;J3KN38;P54105	1;1;1;1	1;1;1;1	1;1;1;1	Methylosome subunit pICln	CLNS1A	>tr|E9PMI6|E9PMI6_HUMAN Methylosome subunit pICln OS=Homo sapiens GN=CLNS1A PE=1 SV=1;>tr|E9PJF4|E9PJF4_HUMAN Methylosome subunit pICln OS=Homo sapiens GN=CLNS1A PE=1 SV=1;>tr|J3KN38|J3KN38_HUMAN Methylosome subunit pICln OS=Homo sapiens GN=CLNS1A PE=1 SV=	4	1	1	1	7.8	7.8	7.8	18.259	167	167;179;203;237	0	5.9808	NaN	NaN	NaN	1	0	Median	NaN	NaN	NaN	1	0	Median	NaN	NaN	NaN	1	0	Median	20595000	9065000	1993400	9536900				523	4720	TRUE	4846	10435
H0YEF9;E9PJZ7;Q13136	H0YEF9;E9PJZ7;Q13136	1;1;1	1;1;1	1;1;1	Liprin-alpha-1	PPFIA1	>tr|H0YEF9|H0YEF9_HUMAN Liprin-alpha-1 (Fragment) OS=Homo sapiens GN=PPFIA1 PE=1 SV=1;>tr|E9PJZ7|E9PJZ7_HUMAN Liprin-alpha-1 OS=Homo sapiens GN=PPFIA1 PE=1 SV=1;>sp|Q13136|LIPA1_HUMAN Liprin-alpha-1 OS=Homo sapiens GN=PPFIA1 PE=1 SV=1	3	1	1	1	2.6	2.6	2.6	44.45	387	387;583;1202	0.0027726	1.225	0.23331	0.95237	9.8349	2	2	Median	1.1702	1.1023	2.0814	2	2	Median	5.0157	1.2534	7.7536	2	2	Median	6940800	3025600	637300	3277900				524	13830	TRUE	14306	31256;31257
E9PK01;P29692;A0A087X1X7;E9PRY8;E9PPR1;E9PL12;E9PQ49;E9PI39;E9PMW7;E9PQZ1;E9PIZ1;H0YCK7;E9PK06;E9PKK3;E9PK72;E9PNW6;E9PJD0;H0YE58;H0YE72;E9PQC9	E9PK01;P29692;A0A087X1X7;E9PRY8;E9PPR1;E9PL12;E9PQ49;E9PI39;E9PMW7;E9PQZ1;E9PIZ1;H0YCK7	12;12;11;11;9;9;9;9;8;8;7;7;5;4;4;3;3;3;3;2	12;12;11;11;9;9;9;9;8;8;7;7;5;4;4;3;3;3;3;2	4;4;4;4;1;1;1;1;1;3;1;1;0;0;0;0;0;3;3;2	Elongation factor 1-delta	EEF1D	>tr|E9PK01|E9PK01_HUMAN Elongation factor 1-delta (Fragment) OS=Homo sapiens GN=EEF1D PE=1 SV=1;>sp|P29692|EF1D_HUMAN Elongation factor 1-delta OS=Homo sapiens GN=EEF1D PE=1 SV=5;>tr|A0A087X1X7|A0A087X1X7_HUMAN Elongation factor 1-delta OS=Homo sapiens GN=	20	12	12	4	56.7	56.7	26.8	28.821	261	261;281;631;697;166;168;199;204;130;238;137;210;140;39;63;35;99;119;156;36	0	93.117	0.30506	1.2207	9.633	25	0	Median	0.9257	0.93916	4.5083	25	0	Median	3.1256	0.7825	9.4543	25	0	Median	2126900000	929900000	305120000	891870000				525	1541;1612;3772;4120;5180;5181;5587;6702;9175;11478;11544;12000	True;True;True;True;True;True;True;True;True;True;True;True	1593;1666;3875;4230;5315;5316;5732;6890;9435;11886;11952;12414	3604;3605;3606;3607;3774;3775;8395;9043;9044;11457;11458;11459;11460;11461;11462;11463;11464;11465;12503;12504;12505;15015;20901;20902;20903;25740;25741;25893;25894;26950;26951
E9PKG1;H7C2I1;Q99873;E9PNR9;E9PQ98;E9PIX6;H0YDE4;A0A087X1W2;E9PMW9;E9PI83	E9PKG1;H7C2I1;Q99873;E9PNR9;E9PQ98;E9PIX6;H0YDE4;A0A087X1W2	5;5;5;4;4;4;4;3;1;1	5;5;5;4;4;4;4;3;1;1	5;5;5;4;4;4;4;3;1;1	Protein arginine N-methyltransferase 1	PRMT1	>tr|E9PKG1|E9PKG1_HUMAN Protein arginine N-methyltransferase 1 OS=Homo sapiens GN=PRMT1 PE=1 SV=1;>tr|H7C2I1|H7C2I1_HUMAN Protein arginine N-methyltransferase 1 OS=Homo sapiens GN=PRMT1 PE=1 SV=1;>sp|Q99873|ANM1_HUMAN Protein arginine N-methyltransferase 1	10	5	5	5	20.9	20.9	20.9	37.709	325	325;371;361;160;205;209;238;285;110;113	0	14.177	0.22266	0.82758	30.742	4	0	Median	0.99583	0.98365	12.957	4	0	Median	4.657	1.2005	18.31	4	0	Median	285540000	126060000	29982000	129490000				526	1183;1610;2274;7205;12531	True;True;True;True;True	1230;1664;2343;7407;12965	2741;2742;2743;3772;5192;5193;16080;28108
E9PN51;F8W9K7;E9PKH6;E9PPW7;O00217	E9PN51;F8W9K7;E9PKH6;E9PPW7;O00217	1;1;1;1;1	1;1;1;1;1	1;1;1;1;1	NADH dehydrogenase [ubiquinone] iron-sulfur protein 8, mitochondrial	NDUFS8	>tr|E9PN51|E9PN51_HUMAN NADH dehydrogenase [ubiquinone] iron-sulfur protein 8, mitochondrial (Fragment) OS=Homo sapiens GN=NDUFS8 PE=1 SV=1;>tr|F8W9K7|F8W9K7_HUMAN NADH dehydrogenase [ubiquinone] iron-sulfur protein 8, mitochondrial (Fragment) OS=Homo sapi	5	1	1	1	8.2	8.2	8.2	12.405	110	110;124;138;184;210	0	3.032	0.27486	1.057	9.1598	2	1	Median	0.96684	0.98695	17.752	2	1	Median	3.5367	0.93031	21.248	2	1	Median	13940000	6068800	1628900	6241800				527	12796	TRUE	13240	28736;28737
E9PKK4;G3V1A9;P42695	E9PKK4;G3V1A9;P42695	2;2;2	2;2;2	2;2;2	Condensin-2 complex subunit D3	NCAPD3	>tr|E9PKK4|E9PKK4_HUMAN Condensin-2 complex subunit D3 OS=Homo sapiens GN=NCAPD3 PE=1 SV=1;>tr|G3V1A9|G3V1A9_HUMAN Condensin-2 complex subunit D3 OS=Homo sapiens GN=NCAPD3 PE=1 SV=1;>sp|P42695|CNDD3_HUMAN Condensin-2 complex subunit D3 OS=Homo sapiens GN=N	3	2	2	2	3	3	3	94.557	832	832;1084;1498	0	5.4121	0.27376	1.0036	7.9343	3	2	Plateau	1.151	1.0699	3.1024	3	2	Plateau	4.2403	1.1686	3.6163	3	2	Median	5937400	2423900	849500	2664000				528	911;11079	True;True	944;11473	2101;24902;24903
E9PKP0;H0YE52;H0YCP5;H0YEF3;Q8TDP1;E9PN81	E9PKP0;H0YE52;H0YCP5;H0YEF3;Q8TDP1;E9PN81	2;2;2;2;2;1	2;2;2;2;2;1	2;2;2;2;2;1	Ribonuclease H2 subunit C	RNASEH2C	>tr|E9PKP0|E9PKP0_HUMAN Ribonuclease H2 subunit C OS=Homo sapiens GN=RNASEH2C PE=1 SV=1;>tr|H0YE52|H0YE52_HUMAN Ribonuclease H2 subunit C (Fragment) OS=Homo sapiens GN=RNASEH2C PE=1 SV=1;>tr|H0YCP5|H0YCP5_HUMAN Ribonuclease H2 subunit C (Fragment) OS=Homo	6	2	2	2	42	42	42	8.9569	81	81;124;129;158;164;247	0	5.7935	NaN	NaN	NaN	1	0	Median	NaN	NaN	NaN	1	0	Median	NaN	NaN	NaN	1	0	Median	4003500	1662600	455740	1885100				529	4029;4199	True;True	4139;4311	8906;9256
E9PKP7;P17480;H0YDH7	E9PKP7;P17480;H0YDH7	2;2;1	2;2;1	2;2;1	Nucleolar transcription factor 1	UBTF	>tr|E9PKP7|E9PKP7_HUMAN Nucleolar transcription factor 1 OS=Homo sapiens GN=UBTF PE=1 SV=1;>sp|P17480|UBF1_HUMAN Nucleolar transcription factor 1 OS=Homo sapiens GN=UBTF PE=1 SV=1;>tr|H0YDH7|H0YDH7_HUMAN Nucleolar transcription factor 1 (Fragment) OS=Homo	3	2	2	2	2.6	2.6	2.6	87.435	745	745;764;36	0.0014549	1.588	NaN	NaN	NaN	1	1	Median	NaN	NaN	NaN	1	1	Median	NaN	NaN	NaN	1	1	Median	6537500	2505500	750840	3281100				530	12955;13796	True;True	13409;14272	29146;31179
H0YDR3;E9PKV8;Q8N5M4	H0YDR3;E9PKV8;Q8N5M4	1;1;1	1;1;1	1;1;1	Tetratricopeptide repeat protein 9C	TTC9C	>tr|H0YDR3|H0YDR3_HUMAN Tetratricopeptide repeat protein 9C (Fragment) OS=Homo sapiens GN=TTC9C PE=1 SV=1;>tr|E9PKV8|E9PKV8_HUMAN Tetratricopeptide repeat protein 9C (Fragment) OS=Homo sapiens GN=TTC9C PE=1 SV=1;>sp|Q8N5M4|TTC9C_HUMAN Tetratricopeptide rep	3	1	1	1	21.7	21.7	21.7	8.1571	69	69;140;171	0	2.5769	NaN	NaN	NaN	1	0	Median	NaN	NaN	NaN	1	0	Median	NaN	NaN	NaN	1	0	Median	14833000	7182600	2326000	5324700				531	653	TRUE	678	1487
E9PL57;F8VSA6;E9PS38;S4R3E9;Q15843;Q86V88	E9PL57;F8VSA6;E9PS38;S4R3E9;Q15843	3;2;2;2;2;1	3;2;2;2;2;1	3;2;2;2;2;1	NEDD8	NEDD8-MDP1;NEDD8	>tr|E9PL57|E9PL57_HUMAN Protein NEDD8-MDP1 (Fragment) OS=Homo sapiens GN=NEDD8-MDP1 PE=4 SV=1;>tr|F8VSA6|F8VSA6_HUMAN NEDD8 OS=Homo sapiens GN=NEDD8 PE=4 SV=1;>tr|E9PS38|E9PS38_HUMAN Protein NEDD8-MDP1 OS=Homo sapiens GN=NEDD8-MDP1 PE=4 SV=2;>tr|S4R3E9|S4R	6	3	3	3	18.8	18.8	18.8	19.536	170	170;50;67;84;81;176	0	24.313	0.22953	0.9602	2.7169	3	0	Median	1.1419	1.2169	0.70464	3	0	Median	4.8269	1.1476	8.0804	3	0	Median	38001000	15094000	5637100	17271000				532	2925;8719;12833	True;True;True	3015;8966;13281	6606;6607;19904;19905;28840
E9PL71;E9PN91	E9PL71;E9PN91	9;8	1;1	1;1		EEF1D	>tr|E9PL71|E9PL71_HUMAN Elongation factor 1-delta (Fragment) OS=Homo sapiens GN=EEF1D PE=1 SV=1;>tr|E9PN91|E9PN91_HUMAN Elongation factor 1-delta OS=Homo sapiens GN=EEF1D PE=1 SV=1	2	9	1	1	52.9	11.2	11.2	20.819	187	187;106	0	6.0975	NaN	NaN	NaN	1	0	Median	NaN	NaN	NaN	1	0	Median	NaN	NaN	NaN	1	0	Median	33851000	15912000	4736600	13202000				533	1541;1612;3772;4120;5180;5181;5587;6702;10696	False;False;False;False;False;False;False;False;True	1593;1666;3875;4230;5315;5316;5732;6890;11079	3604;3605;3606;3607;3774;3775;8395;9043;9044;11457;11458;11459;11460;11461;11462;11463;11464;11465;12503;12504;12505;15015;24053
E9PLK3;P55786;A6NEC2;H0YDG0;E9PP11;H0YCQ5	E9PLK3;P55786	18;18;5;4;4;3	18;18;5;4;4;3	18;18;5;4;4;3	Puromycin-sensitive aminopeptidase	NPEPPS	>tr|E9PLK3|E9PLK3_HUMAN Puromycin-sensitive aminopeptidase OS=Homo sapiens GN=NPEPPS PE=1 SV=1;>sp|P55786|PSA_HUMAN Puromycin-sensitive aminopeptidase OS=Homo sapiens GN=NPEPPS PE=1 SV=2	6	18	18	18	24.5	24.5	24.5	102.99	915	915;919;478;169;201;65	0	41.525	0.23924	0.94927	11.662	20	0	Median	1.1436	1.1368	8.7368	20	0	Median	4.8344	1.2365	11.204	20	0	Median	390910000	160910000	48094000	181910000				534	470;502;574;1571;2628;3512;7807;8458;8916;9697;10279;11538;11875;12678;13019;14046;14907;15310	True;True;True;True;True;True;True;True;True;True;True;True;True;True;True;True;True;True	487;520;594;1625;2708;3609;8030;8698;9166;10042;10650;11946;12289;13118;13473;14538;15434;15853	1011;1012;1013;1101;1273;1274;3691;3692;5961;7812;17723;17724;19361;19362;20339;22079;22080;23262;25882;25883;25884;26694;26695;26696;26697;28457;29283;29284;29285;31946;31947;31948;34025;34026;34979
E9PLL6;P46776;E9PJD9;E9PLX7	E9PLL6;P46776;E9PJD9	6;6;5;2	6;6;5;2	6;6;5;2	60S ribosomal protein L27a	RPL27A	>tr|E9PLL6|E9PLL6_HUMAN 60S ribosomal protein L27a OS=Homo sapiens GN=RPL27A PE=1 SV=1;>sp|P46776|RL27A_HUMAN 60S ribosomal protein L27a OS=Homo sapiens GN=RPL27A PE=1 SV=2;>tr|E9PJD9|E9PJD9_HUMAN 60S ribosomal protein L27a OS=Homo sapiens GN=RPL27A PE=1 S	4	6	6	6	44.4	44.4	44.4	12.201	108	108;148;91;113	0	24.025	0.22075	0.85093	13.231	7	0	Median	0.95806	0.99922	4.4717	7	0	Median	4.5048	1.1883	14.6	7	0	Median	400640000	177290000	43063000	180290000				535	6258;9248;9936;10147;10148;12503	True;True;True;True;True;True	6429;9512;10289;10511;10512;12936	14035;14036;21110;22528;22529;23011;23012;28059
E9PPJ5;E9PLM6;P21741	E9PPJ5;E9PLM6;P21741	1;1;1	1;1;1	1;1;1	Midkine	MDK	>tr|E9PPJ5|E9PPJ5_HUMAN Midkine (Fragment) OS=Homo sapiens GN=MDK PE=1 SV=1;>tr|E9PLM6|E9PLM6_HUMAN Midkine OS=Homo sapiens GN=MDK PE=1 SV=1;>sp|P21741|MK_HUMAN Midkine OS=Homo sapiens GN=MDK PE=1 SV=1	3	1	1	1	7.6	7.6	7.6	14.374	131	131;156;143	0	9.1646	0.2218	0.91156	97.905	3	2	Median	1.0906	1.1329	5.3173	3	2	Median	27.072	6.3626	95.428	3	2	Plateau	26741000	12551000	793340	13397000				536	15265	TRUE	15805	34875;34876;34877
I3L3B4;F8W9H0;E9PLN8;Q9BQB6	I3L3B4;F8W9H0;E9PLN8;Q9BQB6	1;1;1;1	1;1;1;1	1;1;1;1	Vitamin K epoxide reductase complex subunit 1	VKORC1	>tr|I3L3B4|I3L3B4_HUMAN Uncharacterized protein (Fragment) OS=Homo sapiens PE=4 SV=1;>tr|F8W9H0|F8W9H0_HUMAN Vitamin K epoxide reductase complex subunit 1 OS=Homo sapiens GN=VKORC1 PE=4 SV=1;>tr|E9PLN8|E9PLN8_HUMAN Uncharacterized protein (Fragment) OS=Hom	4	1	1	1	12.5	12.5	12.5	11.082	104	104;149;166;163	0	5.9808	0.20327	0.85697	30.065	2	0	Median	1.0578	1.0912	5.8388	2	0	Median	5.0294	1.2108	23.581	2	0	Median	32265000	14510000	2776700	14979000				537	867	TRUE	899	2003;2004
E9PSF0;E9PRL5;H3BSU7;E9PLR1;G3V155;Q9Y320	E9PSF0;E9PRL5;H3BSU7;E9PLR1;G3V155;Q9Y320	1;1;1;1;1;1	1;1;1;1;1;1	1;1;1;1;1;1	Thioredoxin-related transmembrane protein 2	TMX2;TMX2-CTNND1	>tr|E9PSF0|E9PSF0_HUMAN Thioredoxin-related transmembrane protein 2 OS=Homo sapiens GN=TMX2 PE=4 SV=1;>tr|E9PRL5|E9PRL5_HUMAN Thioredoxin-related transmembrane protein 2 OS=Homo sapiens GN=TMX2 PE=4 SV=1;>tr|H3BSU7|H3BSU7_HUMAN Protein TMX2-CTNND1 OS=Homo	6	1	1	1	17.9	17.9	17.9	9.5744	84	84;86;103;103;115;296	0	4.071	0.32334	1.2017	23.994	2	1	Median	1.1211	1.1407	2.5702	2	1	Median	3.296	0.85711	19.395	2	1	Median	3580300	1450500	583090	1546700				538	1732	TRUE	1788	4059;4060
E9PM04;H0YCN4;Q9BTE7;H0Y9C5;H0Y907;Q92564	E9PM04;H0YCN4;Q9BTE7;H0Y9C5;H0Y907;Q92564	2;2;2;1;1;1	2;2;2;1;1;1	2;2;2;1;1;1	DCN1-like protein;DCN1-like protein 5;DCN1-like protein 4	DCUN1D5;DCUN1D4	>tr|E9PM04|E9PM04_HUMAN DCN1-like protein OS=Homo sapiens GN=DCUN1D5 PE=1 SV=1;>tr|H0YCN4|H0YCN4_HUMAN DCN1-like protein (Fragment) OS=Homo sapiens GN=DCUN1D5 PE=1 SV=1;>sp|Q9BTE7|DCNL5_HUMAN DCN1-like protein 5 OS=Homo sapiens GN=DCUN1D5 PE=1 SV=1;>tr|H0Y	6	2	2	2	11.2	11.2	11.2	17.855	152	152;195;237;21;116;292	0.0014409	1.4885	0.26576	1.0913	5.7232	3	2	Median	0.91736	0.93447	4.6119	3	2	Median	3.7848	0.9753	10.05	3	2	Plateau	33479000	14882000	4788900	13808000				539	11917;14914	True;True	12331;15441	26783;26784;34052
E9PM69;R4GNH3;P17980;E9PKD5;E9PMD8;E9PN50;E9PLG2	E9PM69;R4GNH3;P17980;E9PKD5;E9PMD8	5;5;5;4;3;2;1	5;5;5;4;3;2;1	5;5;5;4;3;2;1	26S protease regulatory subunit 6A	PSMC3	>tr|E9PM69|E9PM69_HUMAN 26S protease regulatory subunit 6A OS=Homo sapiens GN=PSMC3 PE=1 SV=1;>tr|R4GNH3|R4GNH3_HUMAN 26S protease regulatory subunit 6A OS=Homo sapiens GN=PSMC3 PE=1 SV=1;>sp|P17980|PRS6A_HUMAN 26S protease regulatory subunit 6A OS=Homo sa	7	5	5	5	20.4	20.4	20.4	44.323	397	397;423;439;311;302;258;184	0	19.651	0.19721	0.73004	13.166	4	0	Median	0.97913	1.0048	3.6212	4	0	Median	4.7928	1.215	8.0666	4	0	Median	122450000	53644000	12921000	55886000				540	2973;7086;7335;10727;13811	True;True;True;True;True	3064;7284;7545;11110;14287	6728;6729;15755;16429;24144;31222
E9PMA0;O95831	E9PMA0;O95831	1;1	1;1	1;1	Apoptosis-inducing factor 1, mitochondrial	AIFM1	>tr|E9PMA0|E9PMA0_HUMAN Apoptosis-inducing factor 1, mitochondrial OS=Homo sapiens GN=AIFM1 PE=1 SV=1;>sp|O95831|AIFM1_HUMAN Apoptosis-inducing factor 1, mitochondrial OS=Homo sapiens GN=AIFM1 PE=1 SV=1	2	1	1	1	4.7	4.7	4.7	29.938	274	274;613	0.00098039	1.6957	NaN	NaN	NaN	1	1	Median	NaN	NaN	NaN	1	1	Median	NaN	NaN	NaN	1	1	Median	11665000	4955400	1826600	4883400				541	6171	TRUE	6331	13848
E9PMP7;F8WD26;J3KP06;Q8WWI1	E9PMP7;F8WD26;J3KP06;Q8WWI1	1;1;1;1	1;1;1;1	1;1;1;1	LIM domain only protein 7	LMO7	>tr|E9PMP7|E9PMP7_HUMAN LIM domain only protein 7 (Fragment) OS=Homo sapiens GN=LMO7 PE=1 SV=5;>tr|F8WD26|F8WD26_HUMAN LIM domain only protein 7 OS=Homo sapiens GN=LMO7 PE=1 SV=2;>tr|J3KP06|J3KP06_HUMAN LIM domain only protein 7 OS=Homo sapiens GN=LMO7 PE=	4	1	1	1	1.5	1.5	1.5	119.52	1046	1046;1631;1668;1683	0	4.0073	NaN	NaN	NaN	1	0	Median	NaN	NaN	NaN	1	0	Median	NaN	NaN	NaN	1	0	Median	2973600	1202300	554910	1216400				542	8911	TRUE	9161	20330
E9PN17;O75964	E9PN17;O75964	5;5	5;5	5;5	ATP synthase subunit g, mitochondrial	ATP5L	>tr|E9PN17|E9PN17_HUMAN ATP synthase subunit g, mitochondrial OS=Homo sapiens GN=ATP5L PE=1 SV=1;>sp|O75964|ATP5L_HUMAN ATP synthase subunit g, mitochondrial OS=Homo sapiens GN=ATP5L PE=1 SV=3	2	5	5	5	64.5	64.5	64.5	8.4518	76	76;103	0	24.717	0.24694	1.0272	12.071	5	0	Median	1.0352	1.063	5.3454	5	0	Median	4.2443	1.0148	7.9494	5	0	Median	245320000	108440000	25943000	110940000				543	6665;6987;7428;12906;13577	True;True;True;True;True	6853;7184;7642;13359;14044	14945;15569;16688;29015;29016;30585
E9PNR2;Q13671	E9PNR2;Q13671	1;1	1;1	1;1	Ras and Rab interactor 1	RIN1	>tr|E9PNR2|E9PNR2_HUMAN Ras and Rab interactor 1 OS=Homo sapiens GN=RIN1 PE=1 SV=1;>sp|Q13671|RIN1_HUMAN Ras and Rab interactor 1 OS=Homo sapiens GN=RIN1 PE=1 SV=4	2	1	1	1	1.8	1.8	1.8	66.545	617	617;783	0.0023685	1.3682	0.20464	0.83572	8.1464	2	2	Median	1.2413	1.2091	2.9444	2	2	Median	6.066	1.4878	5.2019	2	2	Median	3579200	1441500	328130	1809600				544	2206	TRUE	2275	5063;5064
E9PNW4;E9PR17;P13987	E9PNW4;E9PR17;P13987	2;2;2	2;2;2	2;2;2	CD59 glycoprotein	CD59	>tr|E9PNW4|E9PNW4_HUMAN CD59 glycoprotein OS=Homo sapiens GN=CD59 PE=1 SV=1;>tr|E9PR17|E9PR17_HUMAN CD59 glycoprotein OS=Homo sapiens GN=CD59 PE=1 SV=1;>sp|P13987|CD59_HUMAN CD59 glycoprotein OS=Homo sapiens GN=CD59 PE=1 SV=1	3	2	2	2	18.5	18.5	18.5	11.985	108	108;130;128	0	2.3209	0.26892	1.1267	13.166	5	4	Median	0.99396	1.021	4.7706	5	4	Median	3.6961	0.90244	13.853	5	4	Median	25473000	11047000	3287700	11138000				545	604;3591	True;True	626;3688	1366;1367;1368;7980;7981
E9PPG9;E9PQ57;P78406	E9PPG9;E9PQ57;P78406	1;1;1	1;1;1	1;1;1	mRNA export factor	RAE1	>tr|E9PPG9|E9PPG9_HUMAN mRNA export factor OS=Homo sapiens GN=RAE1 PE=1 SV=1;>tr|E9PQ57|E9PQ57_HUMAN mRNA export factor OS=Homo sapiens GN=RAE1 PE=1 SV=1;>sp|P78406|RAE1L_HUMAN mRNA export factor OS=Homo sapiens GN=RAE1 PE=1 SV=1	3	1	1	1	6.5	6.5	6.5	24.061	217	217;437;368	0	2.6249	NaN	NaN	NaN	1	0	Median	NaN	NaN	NaN	1	0	Median	NaN	NaN	NaN	1	0	Median	16721000	6571800	1685600	8463700				546	1262	TRUE	1310	2912
E9PQ56;H0YEM1;Q9UHX1;E9PMU7;E9PN18;E9PL19;H0YCP8	E9PQ56;H0YEM1;Q9UHX1;E9PMU7;E9PN18;E9PL19;H0YCP8	4;4;4;3;3;2;2	4;4;4;3;3;2;2	4;4;4;3;3;2;2	Poly(U)-binding-splicing factor PUF60	PUF60	>tr|E9PQ56|E9PQ56_HUMAN Poly(U)-binding-splicing factor PUF60 (Fragment) OS=Homo sapiens GN=PUF60 PE=1 SV=5;>tr|H0YEM1|H0YEM1_HUMAN Poly(U)-binding-splicing factor PUF60 (Fragment) OS=Homo sapiens GN=PUF60 PE=1 SV=1;>sp|Q9UHX1|PUF60_HUMAN Poly(U)-binding-s	7	4	4	4	17.6	17.6	17.6	34.529	323	323;336;559;247;263;228;273	0	15.998	0.24018	0.95038	13.774	4	0	Median	1.0542	1.0272	12.858	4	0	Median	4.9074	1.2911	15.035	4	0	Median	114040000	50020000	13047000	50975000				547	5221;7806;10404;13765	True;True;True;True	5358;8029;10780;14239	11532;17720;17721;17722;23504;31061
E9PQI5;E9PQ80;E9PSI1;Q9BY43	E9PQI5;E9PQ80;E9PSI1;Q9BY43	2;2;2;2	2;2;2;2	2;2;2;2	Charged multivesicular body protein 4a	CHMP4A	>tr|E9PQI5|E9PQI5_HUMAN Charged multivesicular body protein 4a OS=Homo sapiens GN=CHMP4A PE=1 SV=1;>tr|E9PQ80|E9PQ80_HUMAN Charged multivesicular body protein 4a (Fragment) OS=Homo sapiens GN=CHMP4A PE=1 SV=1;>tr|E9PSI1|E9PSI1_HUMAN Uncharacterized protein	4	2	2	2	12.7	12.7	12.7	18.845	166	166;213;815;222	0	3.8722	NaN	NaN	NaN	1	1	Median	NaN	NaN	NaN	1	1	Median	NaN	NaN	NaN	1	1	Median	12992000	7322300	973740	4696400				548	117;2708	True;True	120;2790	199;6122
H7BYV1;E9PS44;E9PQN9;P13164;Q01629;Q01628	H7BYV1;E9PS44;E9PQN9;P13164;Q01629;Q01628	1;1;1;1;1;1	1;1;1;1;1;1	1;1;1;1;1;1	Interferon-induced transmembrane protein 1;Interferon-induced transmembrane protein 2;Interferon-induced transmembrane protein 3	IFITM2;IFITM3;IFITM1	>tr|H7BYV1|H7BYV1_HUMAN Interferon-induced transmembrane protein 2 (Fragment) OS=Homo sapiens GN=IFITM2 PE=4 SV=1;>tr|E9PS44|E9PS44_HUMAN Interferon-induced transmembrane protein 3 OS=Homo sapiens GN=IFITM3 PE=1 SV=1;>tr|E9PQN9|E9PQN9_HUMAN Interferon-indu	6	1	1	1	21.6	21.6	21.6	8.0866	74	74;112;112;125;132;133	0	11.084	NaN	NaN	NaN	1	1	Median	NaN	NaN	NaN	1	1	Median	NaN	NaN	NaN	1	1	Median	6898300	5433800	236680	1227900				549	9660	TRUE	9996	21995;21996
E9PR30;P62861	E9PR30;P62861	2;2	2;2	2;2	40S ribosomal protein S30	FAU	>tr|E9PR30|E9PR30_HUMAN 40S ribosomal protein S30 OS=Homo sapiens GN=FAU PE=1 SV=1;>sp|P62861|RS30_HUMAN 40S ribosomal protein S30 OS=Homo sapiens GN=FAU PE=1 SV=1	2	2	2	2	11.2	11.2	11.2	10.905	98	98;59	0	3.7803	0.20701	0.82472	8.6374	4	0	Median	0.94073	0.95291	2.6296	4	0	Median	4.7161	1.0905	11	4	0	Median	125080000	57421000	12290000	55369000				550	4088;4089	True;True	4198;4199	8988;8989;8990;8991;8992;8993
E9PSI0;H0YEN0;Q9NPQ8	E9PSI0;H0YEN0;Q9NPQ8	1;1;1	1;1;1	1;1;1	Synembryn-A	RIC8A	>tr|E9PSI0|E9PSI0_HUMAN Synembryn-A (Fragment) OS=Homo sapiens GN=RIC8A PE=1 SV=1;>tr|H0YEN0|H0YEN0_HUMAN Synembryn-A (Fragment) OS=Homo sapiens GN=RIC8A PE=1 SV=5;>sp|Q9NPQ8|RIC8A_HUMAN Synembryn-A OS=Homo sapiens GN=RIC8A PE=1 SV=3	3	1	1	1	4.9	4.9	4.9	20.742	183	183;287;531	0	2.2205	0.28965	1.0894	6.7071	2	2	Median	1.0779	1.0999	5.6229	2	2	Median	3.7215	0.94223	1.0843	2	2	Median	4823800	2085700	561380	2176700				551	8203	TRUE	8433	18730;18731
F2Z2B9;Q9BSJ2;B3KTU7	F2Z2B9;Q9BSJ2	3;3;1	3;3;1	3;3;1	Gamma-tubulin complex component 2	TUBGCP2	>tr|F2Z2B9|F2Z2B9_HUMAN Gamma-tubulin complex component 2 OS=Homo sapiens GN=TUBGCP2 PE=1 SV=1;>sp|Q9BSJ2|GCP2_HUMAN Gamma-tubulin complex component 2 OS=Homo sapiens GN=TUBGCP2 PE=1 SV=2	3	3	3	3	4.9	4.9	4.9	82.603	721	721;902;495	0	13.126	0.24048	0.93378	19.605	3	1	Median	1.0374	0.99151	15.411	3	1	Plateau	4.0226	1.0055	4.6802	3	1	Median	16560000	7778800	1732100	7049000				552	9955;15401;15436	True;True;True	10309;15945;15980	22590;35157;35251
F5GWF6;P78371;F8VQ14	F5GWF6;P78371;F8VQ14	15;15;13	15;15;13	15;15;13	T-complex protein 1 subunit beta	CCT2	>tr|F5GWF6|F5GWF6_HUMAN T-complex protein 1 subunit beta OS=Homo sapiens GN=CCT2 PE=1 SV=2;>sp|P78371|TCPB_HUMAN T-complex protein 1 subunit beta OS=Homo sapiens GN=CCT2 PE=1 SV=4;>tr|F8VQ14|F8VQ14_HUMAN T-complex protein 1 subunit beta OS=Homo sapiens GN=	3	15	15	15	41.7	41.7	41.7	56.806	530	530;535;416	0	78.473	0.2479	1.0377	10.398	14	0	Median	1.0102	0.99797	4.6656	14	0	Median	4.057	1.0399	15.354	14	0	Median	1305100000	576720000	158030000	570320000				553	1482;2722;2761;4224;5315;6961;7038;7366;7437;7771;9019;9532;10589;11611;14356	True;True;True;True;True;True;True;True;True;True;True;True;True;True;True	1534;2804;2844;4338;5452;7158;7235;7576;7651;7994;9275;9846;10970;12019;14863	3499;3500;6157;6158;6228;9312;11736;15522;15667;16501;16502;16710;17666;17667;20548;21702;23852;26048;26049;32716
F5GWH2	F5GWH2	3	1	1		ACSL3	>tr|F5GWH2|F5GWH2_HUMAN Long-chain-fatty-acid--CoA ligase 3 (Fragment) OS=Homo sapiens GN=ACSL3 PE=1 SV=1	1	3	1	1	30.5	12.1	12.1	15.393	141	141	1	-2	NaN	NaN	NaN	0	0	Median	NaN	NaN	NaN	0	0	Median	NaN	NaN	NaN	0	0	Median	6649900	6649900	0	0	+			554	4573;8010;9520	False;False;True	4696;8239;9834	10072;18212;21690
F5GWT4;Q9H4A3;F6UYG0	F5GWT4;Q9H4A3;F6UYG0	5;5;3	5;5;3	5;5;3	Serine/threonine-protein kinase WNK1	WNK1	>tr|F5GWT4|F5GWT4_HUMAN Serine/threonine-protein kinase WNK1 OS=Homo sapiens GN=WNK1 PE=1 SV=1;>sp|Q9H4A3|WNK1_HUMAN Serine/threonine-protein kinase WNK1 OS=Homo sapiens GN=WNK1 PE=1 SV=2;>tr|F6UYG0|F6UYG0_HUMAN Serine/threonine-protein kinase WNK1 OS=Homo	3	5	5	5	2.9	2.9	2.9	225.5	2134	2134;2382;393	0	12.21	0.32252	1.0612	35.956	6	5	Median	1.0982	1.0429	14.405	6	5	Median	3.6669	1.0987	43.541	6	5	Median	38067000	14087000	6054000	17926000				555	2887;4117;7709;11486;11925	True;True;True;True;True	2976;4227;7931;11894;12339	6504;9032;17422;17423;25760;26795
H0YFI1;F5H479;F5GX19;F5H3Y3;Q6IAA8	H0YFI1;F5H479;F5GX19;F5H3Y3;Q6IAA8	1;1;1;1;1	1;1;1;1;1	1;1;1;1;1	Ragulator complex protein LAMTOR1	LAMTOR1	>tr|H0YFI1|H0YFI1_HUMAN Ragulator complex protein LAMTOR1 (Fragment) OS=Homo sapiens GN=LAMTOR1 PE=1 SV=1;>tr|F5H479|F5H479_HUMAN Ragulator complex protein LAMTOR1 OS=Homo sapiens GN=LAMTOR1 PE=1 SV=1;>tr|F5GX19|F5GX19_HUMAN Ragulator complex protein LAMTO	5	1	1	1	16.5	16.5	16.5	8.5974	79	79;99;142;160;161	0.0027739	1.2281	NaN	NaN	NaN	1	1	Median	NaN	NaN	NaN	1	1	Median	NaN	NaN	NaN	1	1	Median	5405800	2291600	563130	2551000				556	12389	TRUE	12815	27789
F5H7X1;F5H169;F5H5V4;F5GX23;J3KN29;O00233	F5H7X1;F5H169;F5H5V4;F5GX23;J3KN29;O00233	1;1;1;1;1;1	1;1;1;1;1;1	1;1;1;1;1;1	26S proteasome non-ATPase regulatory subunit 9	PSMD9	>tr|F5H7X1|F5H7X1_HUMAN 26S proteasome non-ATPase regulatory subunit 9 OS=Homo sapiens GN=PSMD9 PE=1 SV=1;>tr|F5H169|F5H169_HUMAN 26S proteasome non-ATPase regulatory subunit 9 OS=Homo sapiens GN=PSMD9 PE=1 SV=1;>tr|F5H5V4|F5H5V4_HUMAN 26S proteasome non-A	6	1	1	1	10.6	10.6	10.6	9.4303	85	85;128;153;179;222;223	0	2.1966	NaN	NaN	NaN	1	0	Median	NaN	NaN	NaN	1	0	Median	NaN	NaN	NaN	1	0	Median	19458000	5790300	6306500	7361600				557	11169	TRUE	11564	25078
F5GXG4;Q96HS1	F5GXG4;Q96HS1	1;1	1;1	1;1	Serine/threonine-protein phosphatase PGAM5, mitochondrial	PGAM5	>tr|F5GXG4|F5GXG4_HUMAN Serine/threonine-protein phosphatase PGAM5, mitochondrial OS=Homo sapiens GN=PGAM5 PE=1 SV=1;>sp|Q96HS1|PGAM5_HUMAN Serine/threonine-protein phosphatase PGAM5, mitochondrial OS=Homo sapiens GN=PGAM5 PE=1 SV=2	2	1	1	1	7.1	7.1	7.1	15.911	140	140;289	0.0062472	1.0038	NaN	NaN	NaN	1	1	Median	NaN	NaN	NaN	1	1	Median	NaN	NaN	NaN	1	1	Median	8880100	3609100	1419700	3851300				558	719	TRUE	747	1646
F5H7R9;F5GXR3;P20962	F5H7R9;F5GXR3;P20962	1;1;1	1;1;1	1;1;1	Parathymosin	PTMS	>tr|F5H7R9|F5H7R9_HUMAN Parathymosin (Fragment) OS=Homo sapiens GN=PTMS PE=1 SV=1;>tr|F5GXR3|F5GXR3_HUMAN Parathymosin OS=Homo sapiens GN=PTMS PE=1 SV=1;>sp|P20962|PTMS_HUMAN Parathymosin OS=Homo sapiens GN=PTMS PE=1 SV=2	3	1	1	1	19.3	19.3	19.3	6.2542	57	57;104;102	0	3.1626	0.30691	1.293	20.526	2	2	Median	1.0217	1.0491	17.197	2	2	Median	3.3289	0.80217	2.3023	2	2	Median	10216000	4337500	1599200	4279000				559	12146	TRUE	12563	27270;27271
F5GXW5;U3KQ07;Q99622	F5GXW5;U3KQ07;Q99622	1;1;1	1;1;1	1;1;1	Protein C10	C12orf57	>tr|F5GXW5|F5GXW5_HUMAN Protein C10 OS=Homo sapiens GN=C12orf57 PE=1 SV=1;>tr|U3KQ07|U3KQ07_HUMAN Protein C10 OS=Homo sapiens GN=C12orf57 PE=1 SV=1;>sp|Q99622|C10_HUMAN Protein C10 OS=Homo sapiens GN=C12orf57 PE=1 SV=1	3	1	1	1	18.6	18.6	18.6	9.9953	97	97;103;126	0	4.3161	0.22319	1.0171	23.319	2	0	Median	0.8753	0.87373	2.2955	2	0	Median	4.0775	0.93392	10.349	2	0	Median	5665800	2791200	758280	2116400				560	14672	TRUE	15191	33558;33559
F5GXX5;P61803;F5H895;A0A0B4J239	F5GXX5;P61803;F5H895;A0A0B4J239	4;4;2;2	4;4;2;2	4;4;2;2	Dolichyl-diphosphooligosaccharide--protein glycosyltransferase subunit DAD1	DAD1	>tr|F5GXX5|F5GXX5_HUMAN Dolichyl-diphosphooligosaccharide--protein glycosyltransferase subunit DAD1 OS=Homo sapiens GN=DAD1 PE=1 SV=1;>sp|P61803|DAD1_HUMAN Dolichyl-diphosphooligosaccharide--protein glycosyltransferase subunit DAD1 OS=Homo sapiens GN=DAD1	4	4	4	4	47.1	47.1	47.1	9.5541	85	85;113;65;78	0	19.36	0.25537	1.0475	10.678	4	0	Median	0.93763	0.92101	5.5878	4	0	Median	3.5617	0.86687	12.56	4	0	Median	81088000	37690000	9915200	33482000				561	275;3786;6368;11093	True;True;True;True	281;3889;6542;11488	536;8413;14263;24944
F5H7C6;F5GYF7;F5H248;Q9UBW8	F5H7C6;F5GYF7;F5H248;Q9UBW8	1;1;1;1	1;1;1;1	1;1;1;1	COP9 signalosome complex subunit 7a	COPS7A	>tr|F5H7C6|F5H7C6_HUMAN COP9 signalosome complex subunit 7a (Fragment) OS=Homo sapiens GN=COPS7A PE=1 SV=1;>tr|F5GYF7|F5GYF7_HUMAN COP9 signalosome complex subunit 7a (Fragment) OS=Homo sapiens GN=COPS7A PE=1 SV=5;>tr|F5H248|F5H248_HUMAN COP9 signalosome c	4	1	1	1	8.3	8.3	8.3	21.306	192	192;213;262;275	0	5.1625	NaN	NaN	NaN	1	1	Median	NaN	NaN	NaN	1	1	Median	NaN	NaN	NaN	1	1	Median	2323200	1056200	313450	953570				562	10572	TRUE	10953	23807
H0YG54;H0YGR4;F5GYG5;Q9Y3B8	H0YG54;H0YGR4;F5GYG5;Q9Y3B8	3;3;3;3	3;3;3;3	3;3;3;3	Oligoribonuclease, mitochondrial	REXO2	>tr|H0YG54|H0YG54_HUMAN Oligoribonuclease, mitochondrial OS=Homo sapiens GN=REXO2 PE=1 SV=2;>tr|H0YGR4|H0YGR4_HUMAN Oligoribonuclease, mitochondrial (Fragment) OS=Homo sapiens GN=REXO2 PE=1 SV=1;>tr|F5GYG5|F5GYG5_HUMAN Oligoribonuclease, mitochondrial OS=H	4	3	3	3	12.8	12.8	12.8	21.848	188	188;192;222;237	0	3.7098	0.23207	0.98167	18.481	4	3	Median	0.82795	0.8434	6.8569	4	3	Median	3.6789	0.91595	15.867	4	3	Median	57648000	26514000	7689900	23444000				563	873;874;5947	True;True;True	905;906;6098	2010;2011;2012;13260
M0R317;F5GYK2;Q9NRL3	M0R317;F5GYK2;Q9NRL3	1;1;1	1;1;1	1;1;1	Striatin-4	STRN4	>tr|M0R317|M0R317_HUMAN Striatin-4 (Fragment) OS=Homo sapiens GN=STRN4 PE=1 SV=1;>tr|F5GYK2|F5GYK2_HUMAN Striatin-4 OS=Homo sapiens GN=STRN4 PE=1 SV=1;>sp|Q9NRL3|STRN4_HUMAN Striatin-4 OS=Homo sapiens GN=STRN4 PE=1 SV=2	3	1	1	1	6.6	6.6	6.6	20.883	198	198;634;753	0.0023321	1.2771	NaN	NaN	NaN	1	1	Median	NaN	NaN	NaN	1	1	Median	NaN	NaN	NaN	1	1	Median	3648600	1532200	348200	1768200				564	966	TRUE	999	2224
F5GYK7;P43304	F5GYK7;P43304	1;1	1;1	1;1	Glycerol-3-phosphate dehydrogenase;Glycerol-3-phosphate dehydrogenase, mitochondrial	GPD2	>tr|F5GYK7|F5GYK7_HUMAN Glycerol-3-phosphate dehydrogenase OS=Homo sapiens GN=GPD2 PE=1 SV=1;>sp|P43304|GPDM_HUMAN Glycerol-3-phosphate dehydrogenase, mitochondrial OS=Homo sapiens GN=GPD2 PE=1 SV=3	2	1	1	1	2.4	2.4	2.4	41.512	379	379;727	0.0014563	1.591	NaN	NaN	NaN	1	0	Median	NaN	NaN	NaN	1	0	Median	NaN	NaN	NaN	1	0	Median	7331000	3099600	769790	3461700				565	13835	TRUE	14311	31264
F5GYN4;J3KR44;Q96FW1;F5H6Q1;F5GYJ8;F5H3F0	F5GYN4;J3KR44;Q96FW1;F5H6Q1;F5GYJ8;F5H3F0	5;5;5;4;4;3	5;5;5;4;4;3	5;5;5;4;4;3	Ubiquitin thioesterase OTUB1	OTUB1	>tr|F5GYN4|F5GYN4_HUMAN Ubiquitin thioesterase OTUB1 OS=Homo sapiens GN=OTUB1 PE=1 SV=1;>tr|J3KR44|J3KR44_HUMAN Ubiquitin thioesterase OTUB1 OS=Homo sapiens GN=OTUB1 PE=1 SV=2;>sp|Q96FW1|OTUB1_HUMAN Ubiquitin thioesterase OTUB1 OS=Homo sapiens GN=OTUB1 PE=	6	5	5	5	24.9	24.9	24.9	28.05	241	241;272;271;280;286;170	0	9.7099	0.22682	0.89113	3.3201	5	0	Median	0.97462	0.99327	3.25	5	0	Median	4.4914	1.1295	3.6624	5	0	Median	182050000	78561000	20435000	83051000				566	3607;6381;7177;8374;14778	True;True;True;True;True	3704;6555;7377;8607;15300	8003;14288;15998;19156;33765;33766
F5GYN7;Q5FWF4	F5GYN7;Q5FWF4	1;1	1;1	1;1	DNA annealing helicase and endonuclease ZRANB3;DNA annealing helicase ZRANB3;Endonuclease ZRANB3	ZRANB3	>tr|F5GYN7|F5GYN7_HUMAN DNA annealing helicase and endonuclease ZRANB3 OS=Homo sapiens GN=ZRANB3 PE=1 SV=2;>sp|Q5FWF4|ZRAB3_HUMAN DNA annealing helicase and endonuclease ZRANB3 OS=Homo sapiens GN=ZRANB3 PE=1 SV=2	2	1	1	1	3.7	3.7	3.7	71.514	625	625;1079	0.010013	0.85843	27.133	103.9	85.623	3	3	Plateau	4.5069	4.4078	51.882	3	3	Plateau	0.17151	0.046294	40.085	3	3	Median	135950000	3759500	117450000	14741000				567	10386	TRUE	10761	23456;23457;23458
J3QL14;R4GN72;F5GYQ1;P61421	J3QL14;R4GN72;F5GYQ1;P61421	1;1;1;1	1;1;1;1	1;1;1;1	V-type proton ATPase subunit d 1	ATP6V0D1	>tr|J3QL14|J3QL14_HUMAN V-type proton ATPase subunit d 1 (Fragment) OS=Homo sapiens GN=ATP6V0D1 PE=1 SV=1;>tr|R4GN72|R4GN72_HUMAN V-type proton ATPase subunit d 1 OS=Homo sapiens GN=ATP6V0D1 PE=1 SV=1;>tr|F5GYQ1|F5GYQ1_HUMAN V-type proton ATPase subunit d	4	1	1	1	4.7	4.7	4.7	26.705	232	232;274;392;351	0.0027816	1.2427	NaN	NaN	NaN	1	1	Median	NaN	NaN	NaN	1	1	Median	NaN	NaN	NaN	1	1	Median	34126000	8563400	2390100	23172000				568	9283	TRUE	9547	21182
F5GZ28;P18858;M0R0Q7;B4E135	F5GZ28;P18858;M0R0Q7	5;5;4;2	5;5;4;2	5;5;4;2	DNA ligase;DNA ligase 1	LIG1	>tr|F5GZ28|F5GZ28_HUMAN DNA ligase OS=Homo sapiens GN=LIG1 PE=1 SV=1;>sp|P18858|DNLI1_HUMAN DNA ligase 1 OS=Homo sapiens GN=LIG1 PE=1 SV=1;>tr|M0R0Q7|M0R0Q7_HUMAN DNA ligase OS=Homo sapiens GN=LIG1 PE=1 SV=1	4	5	5	5	7.6	7.6	7.6	93.946	851	851;919;800;415	0	7.1907	0.27398	1.0332	9.8216	7	7	Median	1.2329	1.1477	8.8957	7	7	Linear	3.7424	0.95986	11.042	7	7	Median	53016000	22027000	7533500	23456000				569	1331;5663;9658;10127;14344	True;True;True;True;True	1380;5809;9994;10491;14851	3111;12646;12647;21993;22977;32693;32694
[truncated: 1,772 more rows]
[truncated: 4 more columns]

## Sheet: X1B raw data
Protein IDs	Majority protein IDs	Peptide counts (all)	Peptide counts (razor+unique)	Peptide counts (unique)	Protein names	Gene names	Fasta headers	Number of proteins	Peptides	Razor + unique peptides	Unique peptides	Sequence coverage [%]	Unique + razor sequence coverage [%]	Unique sequence coverage [%]	Mol. weight [kDa]	Sequence length	Sequence lengths	Q-value	Score	Ratio M/L	Ratio M/L normalized	Ratio M/L variability [%]	Ratio M/L count	Ratio M/L iso-count	Ratio M/L type	Ratio H/L	Ratio H/L normalized	Ratio H/L variability [%]	Ratio H/L count	Ratio H/L iso-count	Ratio H/L type	Ratio H/M	Ratio H/M normalized	Ratio H/M variability [%]	Ratio H/M count	Ratio H/M iso-count	Ratio H/M type	Intensity	Intensity L	Intensity M	Intensity H	Only identified by site	Reverse	Potential contaminant	id	Peptide IDs	Peptide is razor	Mod. peptide IDs	Evidence IDs
[truncated: 2,192 more rows]
[truncated: 4 more columns]

[truncated: 9 more sheets: X1-combined raw data, X2A raw data, X2B raw data, X2-combined raw data, Log2 Ratios, Changing C3_1 and C5_1 , Info MESO, Raw data, Log2 ratios (2)]
